# Supplementary material for: Serotonin Promotes Serum Albumin Interaction with the Monomeric Amyloid β Peptide
Source: MDPI journal article supplement (doi:10.3390/ijms22115896), 2021-05-31
Supplement: s1 [file s1]

## Supplementary materials

# Serotonin Promotes Serum Albumin Interaction with Monomeric Amyloid $\beta$ Peptide

Ekaterina A. Litus<sup>1</sup>, Alexey S. Kazakov<sup>1</sup>, Evgenia I. Deryusheva<sup>1</sup>, Ekaterina L. Nemashkalova<sup>1</sup>, Marina P. Shevelyova<sup>1</sup>, Aliya A. Nazipova<sup>1</sup>, Maria E. Permyakova<sup>1</sup>, Elena V. Raznikova<sup>1</sup>, Vladimir N. Uversky<sup>2,\*</sup>, Sergei E. Permyakov<sup>1,\*</sup>

<sup>1</sup> Institute for Biological Instrumentation, Pushchino Scientific Center for Biological Research of the Russian Academy of Sciences, Pushchino, Moscow Region 142290, Russia; [elitus@gmail.com](mailto:elitus@gmail.com) (E.A.L.); [fenixfly@yandex.ru](mailto:fenixfly@yandex.ru) (A.S.K.); [janed1986@ya.ru](mailto:janed1986@ya.ru) (E.I.D.); [elnemashkalova@gmail.com](mailto:elnemashkalova@gmail.com) (E.L.N.); [marina.shevelyova@gmail.com](mailto:marina.shevelyova@gmail.com) (M.P.S.); [aliya-alex@rambler.ru](mailto:aliya-alex@rambler.ru) (A.A.N.); [mperm1977@gmail.com](mailto:mperm1977@gmail.com) (M.E.P.); [raznikova.elena@yandex.ru](mailto:raznikova.elena@yandex.ru) (E.V.R.); [permyakov.s@gmail.com](mailto:permyakov.s@gmail.com) (S.E.P.)

<sup>2</sup> Department of Molecular Medicine and USF Health Byrd Alzheimer's Research Institute, Morsani College of Medicine, University of South Florida, Tampa, FL 33612, USA; [vuversky@usf.edu](mailto:vuversky@usf.edu)

\* Correspondence: (V.N.U.); [permyakov.s@gmail.com](mailto:permyakov.s@gmail.com) (S.E.P.); Tel.: +7-(495)-143-7741 (S.E.P.); Fax: +7-(4967)-33-05-22 (S.E.P.)

**ALB\_SRO.pdb and ALB\_TRP.pdb files:** model tertiary structures of HSA-SRO/TRP complexes predicted using AutoDock Vina software (<http://vina.scripps.edu/index.html>) [1], based on crystal structure of HSA (chain A of PDB entry 1UOR).

1. Trott, O. and A.J. Olson, *AutoDock Vina: improving the speed and accuracy of docking with a new scoring function, efficient optimization, and multithreading*. J Comput Chem, 2010. **31**(2): p. 455-61.

### ALB\_SRO.pdb

```
CRYST1    58.860    88.280    60.680  90.00 101.85  90.00 P 1 21 1      0
ATOM       1  N   LYS A   4      -4.155 -21.388 -11.190  1.00 29.11      N
ATOM       2  CA  LYS A   4      -3.964 -19.918 -11.113  1.00 27.16      C
ATOM       3  C   LYS A   4      -2.692 -19.737 -10.315  1.00 26.91      C
ATOM       4  O   LYS A   4      -2.108 -20.724  -9.881  1.00 25.06      O
ATOM       5  CB  LYS A   4      -5.146 -19.257 -10.398  1.00 25.62      C
ATOM       6  CG  LYS A   4      -6.503 -19.517 -11.051  1.00 24.88      C
ATOM       7  CD  LYS A   4      -7.331 -18.233 -11.175  1.00 26.34      C
ATOM       8  CE  LYS A   4      -8.649 -18.441 -11.958  1.00 27.70      C
ATOM       9  NZ  LYS A   4      -9.717 -19.227 -11.215  1.00 25.48      N1+
ATOM      10  N   SER A   5      -2.168 -18.518 -10.290  1.00 28.23      N
ATOM      11  CA  SER A   5      -0.939 -18.247  -9.551  1.00 30.21      C
ATOM      12  C   SER A   5      -1.207 -17.300  -8.380  1.00 30.60      C
ATOM      13  O   SER A   5      -2.299 -16.719  -8.247  1.00 28.63      O
ATOM      14  CB  SER A   5       0.155 -17.652 -10.476  1.00 30.07      C
ATOM      15  OG  SER A   5       0.110 -16.225 -10.543  1.00 25.84      O
ATOM      16  N   GLU A   6      -0.206 -17.159  -7.526  1.00 29.67      N
ATOM      17  CA  GLU A   6      -0.250 -16.146  -6.511  1.00 28.73      C
ATOM      18  C   GLU A   6       0.506 -14.913  -6.949  1.00 25.98      C
ATOM      19  O   GLU A   6      -0.094 -13.854  -7.065  1.00 25.99      O
ATOM      20  CB  GLU A   6       0.289 -16.706  -5.196  1.00 32.20      C
ATOM      21  CG  GLU A   6      -0.730 -17.561  -4.457  1.00 34.86      C
ATOM      22  CD  GLU A   6      -2.158 -17.229  -4.877  1.00 37.50      C
ATOM      23  OE1 GLU A   6      -2.669 -16.146  -4.502  1.00 36.49      O
```

|      |    |     |     |   |    |        |         |         |      |       |     |
|------|----|-----|-----|---|----|--------|---------|---------|------|-------|-----|
| ATOM | 24 | OE2 | GLU | A | 6  | -2.746 | -18.025 | -5.641  | 1.00 | 41.69 | O1- |
| ATOM | 25 | N   | VAL | A | 7  | 1.732  | -15.105 | -7.428  | 1.00 | 26.46 | N   |
| ATOM | 26 | CA  | VAL | A | 7  | 2.660  | -13.992 | -7.658  | 1.00 | 28.01 | C   |
| ATOM | 27 | C   | VAL | A | 7  | 2.019  | -12.877 | -8.472  | 1.00 | 29.09 | C   |
| ATOM | 28 | O   | VAL | A | 7  | 1.728  | -11.784 | -7.951  | 1.00 | 28.54 | O   |
| ATOM | 29 | CB  | VAL | A | 7  | 3.929  | -14.439 | -8.413  | 1.00 | 27.74 | C   |
| ATOM | 30 | CG1 | VAL | A | 7  | 4.947  | -13.333 | -8.405  | 1.00 | 29.26 | C   |
| ATOM | 31 | CG2 | VAL | A | 7  | 4.524  | -15.668 | -7.773  | 1.00 | 31.03 | C   |
| ATOM | 32 | N   | ALA | A | 8  | 1.681  | -13.202 | -9.716  | 1.00 | 29.77 | N   |
| ATOM | 33 | CA  | ALA | A | 8  | 1.215  | -12.182 | -10.646 | 1.00 | 29.95 | C   |
| ATOM | 34 | C   | ALA | A | 8  | -0.133 | -11.672 | -10.189 | 1.00 | 29.29 | C   |
| ATOM | 35 | O   | ALA | A | 8  | -0.491 | -10.525 | -10.473 | 1.00 | 30.27 | O   |
| ATOM | 36 | CB  | ALA | A | 8  | 1.117  | -12.736 | -12.073 | 1.00 | 29.88 | C   |
| ATOM | 37 | N   | HIS | A | 9  | -0.866 | -12.500 | -9.452  | 1.00 | 28.46 | N   |
| ATOM | 38 | CA  | HIS | A | 9  | -2.215 | -12.121 | -9.052  | 1.00 | 28.28 | C   |
| ATOM | 39 | C   | HIS | A | 9  | -2.121 | -10.972 | -8.070  | 1.00 | 28.15 | C   |
| ATOM | 40 | O   | HIS | A | 9  | -2.926 | -10.045 | -8.124  | 1.00 | 28.25 | O   |
| ATOM | 41 | CB  | HIS | A | 9  | -2.961 | -13.275 | -8.387  | 1.00 | 26.15 | C   |
| ATOM | 42 | CG  | HIS | A | 9  | -4.260 | -12.866 | -7.776  | 1.00 | 23.88 | C   |
| ATOM | 43 | CD2 | HIS | A | 9  | -5.086 | -11.821 | -8.052  | 1.00 | 22.55 | C   |
| ATOM | 44 | ND1 | HIS | A | 9  | -4.868 | -13.577 | -6.766  | 1.00 | 22.06 | N   |
| ATOM | 45 | CE1 | HIS | A | 9  | -6.009 | -12.994 | -6.443  | 1.00 | 23.71 | C   |
| ATOM | 46 | NE2 | HIS | A | 9  | -6.162 | -11.927 | -7.212  | 1.00 | 25.62 | N   |
| ATOM | 47 | N   | ARG | A | 10 | -1.181 | -11.070 | -7.134  | 1.00 | 26.61 | N   |
| ATOM | 48 | CA  | ARG | A | 10 | -0.934 | -9.977  | -6.211  | 1.00 | 26.64 | C   |
| ATOM | 49 | C   | ARG | A | 10 | -0.481 | -8.776  | -7.042  | 1.00 | 26.73 | C   |
| ATOM | 50 | O   | ARG | A | 10 | -1.080 | -7.701  | -6.952  | 1.00 | 26.46 | O   |
| ATOM | 51 | CB  | ARG | A | 10 | 0.123  | -10.384 | -5.179  | 1.00 | 25.45 | C   |
| ATOM | 52 | CG  | ARG | A | 10 | -0.411 | -11.233 | -3.973  | 1.00 | 26.28 | C   |
| ATOM | 53 | CD  | ARG | A | 10 | -1.808 | -11.885 | -4.176  | 1.00 | 22.90 | C   |
| ATOM | 54 | NE  | ARG | A | 10 | -2.565 | -11.999 | -2.920  | 1.00 | 22.44 | N   |
| ATOM | 55 | CZ  | ARG | A | 10 | -3.843 | -12.387 | -2.815  | 1.00 | 23.29 | C   |
| ATOM | 56 | NH1 | ARG | A | 10 | -4.491 | -12.934 | -3.836  | 1.00 | 20.37 | N1+ |
| ATOM | 57 | NH2 | ARG | A | 10 | -4.460 | -12.295 | -1.650  | 1.00 | 22.05 | N   |
| ATOM | 58 | N   | PHE | A | 11 | 0.332  | -9.061  | -8.061  | 1.00 | 27.91 | N   |
| ATOM | 59 | CA  | PHE | A | 11 | 0.735  | -8.053  | -9.045  | 1.00 | 25.84 | C   |
| ATOM | 60 | C   | PHE | A | 11 | -0.452 | -7.383  | -9.727  | 1.00 | 24.74 | C   |
| ATOM | 61 | O   | PHE | A | 11 | -0.444 | -6.168  | -9.938  | 1.00 | 25.29 | O   |
| ATOM | 62 | CB  | PHE | A | 11 | 1.652  | -8.664  | -10.105 | 1.00 | 24.40 | C   |
| ATOM | 63 | CG  | PHE | A | 11 | 2.851  | -7.809  | -10.430 | 1.00 | 27.14 | C   |
| ATOM | 64 | CD1 | PHE | A | 11 | 2.762  | -6.785  | -11.368 | 1.00 | 26.91 | C   |
| ATOM | 65 | CD2 | PHE | A | 11 | 4.042  | -7.965  | -9.728  | 1.00 | 26.00 | C   |
| ATOM | 66 | CE1 | PHE | A | 11 | 3.829  | -5.934  | -11.585 | 1.00 | 27.01 | C   |
| ATOM | 67 | CE2 | PHE | A | 11 | 5.115  | -7.111  | -9.945  | 1.00 | 25.82 | C   |
| ATOM | 68 | CZ  | PHE | A | 11 | 5.009  | -6.095  | -10.871 | 1.00 | 25.28 | C   |
| ATOM | 69 | N   | LYS | A | 12 | -1.530 | -8.136  | -9.903  | 1.00 | 23.91 | N   |
| ATOM | 70 | CA  | LYS | A | 12 | -2.692 | -7.668  | -10.651 | 1.00 | 22.95 | C   |
| ATOM | 71 | C   | LYS | A | 12 | -3.685 | -6.841  | -9.819  | 1.00 | 22.94 | C   |
| ATOM | 72 | O   | LYS | A | 12 | -4.825 | -6.624  | -10.255 | 1.00 | 22.98 | O   |
| ATOM | 73 | CB  | LYS | A | 12 | -3.449 | -8.860  | -11.267 | 1.00 | 23.41 | C   |
| ATOM | 74 | CG  | LYS | A | 12 | -2.859 | -9.489  | -12.523 | 1.00 | 18.48 | C   |
| ATOM | 75 | CD  | LYS | A | 12 | -3.793 | -10.579 | -13.069 | 1.00 | 15.47 | C   |
| ATOM | 76 | CE  | LYS | A | 12 | -3.024 | -11.641 | -13.836 | 1.00 | 13.47 | C   |
| ATOM | 77 | NZ  | LYS | A | 12 | -2.824 | -11.308 | -15.273 | 1.00 | 12.20 | N1+ |
| ATOM | 78 | N   | ASP | A | 13 | -3.313 | -6.444  | -8.606  | 1.00 | 22.30 | N   |
| ATOM | 79 | CA  | ASP | A | 13 | -4.140 | -5.462  | -7.897  | 1.00 | 22.25 | C   |
| ATOM | 80 | C   | ASP | A | 13 | -3.358 | -4.266  | -7.363  | 1.00 | 20.77 | C   |
| ATOM | 81 | O   | ASP | A | 13 | -3.612 | -3.114  | -7.758  | 1.00 | 18.06 | O   |
| ATOM | 82 | CB  | ASP | A | 13 | -4.929 | -6.102  | -6.748  | 1.00 | 27.23 | C   |
| ATOM | 83 | CG  | ASP | A | 13 | -4.846 | -7.609  | -6.734  | 1.00 | 30.68 | C   |
| ATOM | 84 | OD1 | ASP | A | 13 | -3.712 | -8.130  | -6.758  | 1.00 | 31.81 | O   |
| ATOM | 85 | OD2 | ASP | A | 13 | -5.905 | -8.262  | -6.569  | 1.00 | 31.63 | O1- |
| ATOM | 86 | N   | LEU | A | 14 | -2.360 | -4.555  | -6.527  | 1.00 | 19.90 | N   |
| ATOM | 87 | CA  | LEU | A | 14 | -1.567 | -3.530  | -5.840  | 1.00 | 19.12 | C   |
| ATOM | 88 | C   | LEU | A | 14 | -0.542 | -2.906  | -6.802  | 1.00 | 21.59 | C   |
| ATOM | 89 | O   | LEU | A | 14 | 0.414  | -2.214  | -6.388  | 1.00 | 20.70 | O   |
| ATOM | 90 | CB  | LEU | A | 14 | -0.867 | -4.154  | -4.625  | 1.00 | 16.73 | C   |
| ATOM | 91 | CG  | LEU | A | 14 | 0.256  | -5.186  | -4.824  | 1.00 | 15.13 | C   |
| ATOM | 92 | CD1 | LEU | A | 14 | 1.447  | -4.781  | -3.981  | 1.00 | 11.65 | C   |
| ATOM | 93 | CD2 | LEU | A | 14 | -0.189 | -6.568  | -4.441  | 1.00 | 11.37 | C   |
| ATOM | 94 | N   | GLY | A | 15 | -0.829 | -3.065  | -8.092  | 1.00 | 21.89 | N   |

|      |     |     |     |   |    |        |        |         |      |       |     |
|------|-----|-----|-----|---|----|--------|--------|---------|------|-------|-----|
| ATOM | 95  | CA  | GLY | A | 15 | 0.087  | -2.683 | -9.140  | 1.00 | 23.39 | C   |
| ATOM | 96  | C   | GLY | A | 15 | 1.491  | -3.220 | -8.965  | 1.00 | 24.62 | C   |
| ATOM | 97  | O   | GLY | A | 15 | 1.700  | -4.264 | -8.353  | 1.00 | 23.01 | O   |
| ATOM | 98  | N   | GLU | A | 16 | 2.457  | -2.395 | -9.367  | 1.00 | 26.22 | N   |
| ATOM | 99  | CA  | GLU | A | 16 | 3.837  | -2.809 | -9.504  | 1.00 | 25.91 | C   |
| ATOM | 100 | C   | GLU | A | 16 | 4.725  | -2.038 | -8.535  | 1.00 | 27.19 | C   |
| ATOM | 101 | O   | GLU | A | 16 | 5.421  | -2.680 | -7.760  | 1.00 | 26.80 | O   |
| ATOM | 102 | CB  | GLU | A | 16 | 4.282  | -2.641 | -10.966 | 1.00 | 27.05 | C   |
| ATOM | 103 | CG  | GLU | A | 16 | 5.730  | -2.204 | -11.175 | 1.00 | 28.89 | C   |
| ATOM | 104 | CD  | GLU | A | 16 | 6.302  | -2.613 | -12.537 | 1.00 | 29.95 | C   |
| ATOM | 105 | OE1 | GLU | A | 16 | 5.637  | -2.398 | -13.596 | 1.00 | 28.27 | O   |
| ATOM | 106 | OE2 | GLU | A | 16 | 7.444  | -3.137 | -12.531 | 1.00 | 28.17 | O1- |
| ATOM | 107 | N   | GLU | A | 17 | 4.596  | -0.699 | -8.451  | 1.00 | 30.38 | N   |
| ATOM | 108 | CA  | GLU | A | 17 | 5.444  | 0.099  | -7.520  | 1.00 | 30.91 | C   |
| ATOM | 109 | C   | GLU | A | 17 | 5.306  | -0.525 | -6.158  | 1.00 | 32.10 | C   |
| ATOM | 110 | O   | GLU | A | 17 | 6.187  | -1.268 | -5.730  | 1.00 | 34.11 | O   |
| ATOM | 111 | CB  | GLU | A | 17 | 5.044  | 1.589  | -7.404  | 1.00 | 28.23 | C   |
| ATOM | 112 | CG  | GLU | A | 17 | 6.165  | 2.451  | -6.706  | 1.00 | 30.17 | C   |
| ATOM | 113 | CD  | GLU | A | 17 | 5.688  | 3.762  | -5.967  | 1.00 | 32.12 | C   |
| ATOM | 114 | OE1 | GLU | A | 17 | 5.082  | 4.666  | -6.598  | 1.00 | 30.67 | O   |
| ATOM | 115 | OE2 | GLU | A | 17 | 6.027  | 3.939  | -4.760  | 1.00 | 31.49 | O1- |
| ATOM | 116 | N   | ASN | A | 18 | 4.054  | -0.563 | -5.720  | 1.00 | 33.09 | N   |
| ATOM | 117 | CA  | ASN | A | 18 | 3.696  | -1.121 | -4.420  | 1.00 | 32.50 | C   |
| ATOM | 118 | C   | ASN | A | 18 | 3.913  | -2.668 | -4.325  | 1.00 | 31.11 | C   |
| ATOM | 119 | O   | ASN | A | 18 | 3.947  | -3.231 | -3.212  | 1.00 | 30.55 | O   |
| ATOM | 120 | CB  | ASN | A | 18 | 2.249  | -0.690 | -4.057  | 1.00 | 31.08 | C   |
| ATOM | 121 | CG  | ASN | A | 18 | 2.086  | 0.851  | -3.988  | 1.00 | 28.14 | C   |
| ATOM | 122 | ND2 | ASN | A | 18 | 0.918  | 1.344  | -4.361  | 1.00 | 28.12 | N   |
| ATOM | 123 | OD1 | ASN | A | 18 | 3.018  | 1.572  | -3.648  | 1.00 | 24.14 | O   |
| ATOM | 124 | N   | PHE | A | 19 | 4.287  | -3.307 | -5.437  | 1.00 | 27.36 | N   |
| ATOM | 125 | CA  | PHE | A | 19 | 4.761  | -4.691 | -5.361  | 1.00 | 25.30 | C   |
| ATOM | 126 | C   | PHE | A | 19 | 6.240  | -4.636 | -5.071  | 1.00 | 25.50 | C   |
| ATOM | 127 | O   | PHE | A | 19 | 6.703  | -5.188 | -4.078  | 1.00 | 26.44 | O   |
| ATOM | 128 | CB  | PHE | A | 19 | 4.513  | -5.455 | -6.667  | 1.00 | 24.34 | C   |
| ATOM | 129 | CG  | PHE | A | 19 | 4.448  | -6.959 | -6.504  | 1.00 | 21.73 | C   |
| ATOM | 130 | CD1 | PHE | A | 19 | 5.594  | -7.720 | -6.488  | 1.00 | 21.65 | C   |
| ATOM | 131 | CD2 | PHE | A | 19 | 3.236  | -7.616 | -6.507  | 1.00 | 21.52 | C   |
| ATOM | 132 | CE1 | PHE | A | 19 | 5.532  | -9.106 | -6.486  | 1.00 | 18.58 | C   |
| ATOM | 133 | CE2 | PHE | A | 19 | 3.175  | -8.997 | -6.508  | 1.00 | 20.40 | C   |
| ATOM | 134 | CZ  | PHE | A | 19 | 4.328  | -9.738 | -6.499  | 1.00 | 18.31 | C   |
| ATOM | 135 | N   | LYS | A | 20 | 6.957  | -3.831 | -5.839  | 1.00 | 24.36 | N   |
| ATOM | 136 | CA  | LYS | A | 20 | 8.340  | -3.545 | -5.501  | 1.00 | 26.07 | C   |
| ATOM | 137 | C   | LYS | A | 20 | 8.335  | -3.055 | -4.053  | 1.00 | 26.27 | C   |
| ATOM | 138 | O   | LYS | A | 20 | 9.090  | -3.567 | -3.221  | 1.00 | 25.42 | O   |
| ATOM | 139 | CB  | LYS | A | 20 | 8.921  | -2.458 | -6.432  | 1.00 | 27.79 | C   |
| ATOM | 140 | CG  | LYS | A | 20 | 9.948  | -2.952 | -7.490  | 1.00 | 26.76 | C   |
| ATOM | 141 | CD  | LYS | A | 20 | 9.952  | -2.041 | -8.743  | 1.00 | 22.31 | C   |
| ATOM | 142 | CE  | LYS | A | 20 | 10.898 | -2.548 | -9.824  | 1.00 | 20.10 | C   |
| ATOM | 143 | NZ  | LYS | A | 20 | 12.337 | -2.566 | -9.387  | 1.00 | 19.71 | N1+ |
| ATOM | 144 | N   | ALA | A | 21 | 7.287  | -2.301 | -3.711  | 1.00 | 26.57 | N   |
| ATOM | 145 | CA  | ALA | A | 21 | 7.264  | -1.504 | -2.480  | 1.00 | 25.54 | C   |
| ATOM | 146 | C   | ALA | A | 21 | 7.045  | -2.381 | -1.289  | 1.00 | 23.24 | C   |
| ATOM | 147 | O   | ALA | A | 21 | 7.661  | -2.178 | -0.261  | 1.00 | 24.58 | O   |
| ATOM | 148 | CB  | ALA | A | 21 | 6.188  | -0.411 | -2.539  | 1.00 | 24.10 | C   |
| ATOM | 149 | N   | LEU | A | 22 | 6.251  | -3.422 | -1.444  | 1.00 | 22.80 | N   |
| ATOM | 150 | CA  | LEU | A | 22 | 6.151  | -4.371 | -0.353  | 1.00 | 23.66 | C   |
| ATOM | 151 | C   | LEU | A | 22 | 7.414  | -5.226 | -0.300  | 1.00 | 22.00 | C   |
| ATOM | 152 | O   | LEU | A | 22 | 8.277  | -4.987 | 0.543   | 1.00 | 22.37 | O   |
| ATOM | 153 | CB  | LEU | A | 22 | 4.892  | -5.242 | -0.489  | 1.00 | 25.44 | C   |
| ATOM | 154 | CG  | LEU | A | 22 | 3.648  | -4.849 | 0.324   | 1.00 | 23.88 | C   |
| ATOM | 155 | CD1 | LEU | A | 22 | 4.053  | -4.132 | 1.586   | 1.00 | 21.55 | C   |
| ATOM | 156 | CD2 | LEU | A | 22 | 2.740  | -3.964 | -0.500  | 1.00 | 23.25 | C   |
| ATOM | 157 | N   | VAL | A | 23 | 7.649  | -5.965 | -1.382  | 1.00 | 19.37 | N   |
| ATOM | 158 | CA  | VAL | A | 23 | 8.590  | -7.075 | -1.410  | 1.00 | 16.76 | C   |
| ATOM | 159 | C   | VAL | A | 23 | 10.018 | -6.698 | -0.945  | 1.00 | 18.40 | C   |
| ATOM | 160 | O   | VAL | A | 23 | 10.734 | -7.519 | -0.372  | 1.00 | 17.50 | O   |
| ATOM | 161 | CB  | VAL | A | 23 | 8.579  | -7.698 | -2.823  | 1.00 | 15.62 | C   |
| ATOM | 162 | CG1 | VAL | A | 23 | 9.429  | -8.950 | -2.878  | 1.00 | 13.90 | C   |
| ATOM | 163 | CG2 | VAL | A | 23 | 7.157  | -8.040 | -3.211  | 1.00 | 9.89  | C   |
| ATOM | 164 | N   | LEU | A | 24 | 10.336 | -5.412 | -0.999  | 1.00 | 20.80 | N   |
| ATOM | 165 | CA  | LEU | A | 24 | 11.503 | -4.879 | -0.319  | 1.00 | 21.23 | C   |

|      |     |     |     |   |    |        |         |        |      |       |   |
|------|-----|-----|-----|---|----|--------|---------|--------|------|-------|---|
| ATOM | 166 | C   | LEU | A | 24 | 11.278 | -4.949  | 1.182  | 1.00 | 22.45 | C |
| ATOM | 167 | O   | LEU | A | 24 | 11.885 | -5.812  | 1.826  | 1.00 | 25.32 | O |
| ATOM | 168 | CB  | LEU | A | 24 | 11.767 | -3.434  | -0.729 | 1.00 | 23.94 | C |
| ATOM | 169 | CG  | LEU | A | 24 | 13.205 | -2.910  | -0.666 | 1.00 | 25.01 | C |
| ATOM | 170 | CD1 | LEU | A | 24 | 13.154 | -1.397  | -0.414 | 1.00 | 24.47 | C |
| ATOM | 171 | CD2 | LEU | A | 24 | 14.017 | -3.618  | 0.417  | 1.00 | 24.82 | C |
| ATOM | 172 | N   | ILE | A | 25 | 10.410 | -4.100  | 1.756  | 1.00 | 21.80 | N |
| ATOM | 173 | CA  | ILE | A | 25 | 10.241 | -4.122  | 3.238  | 1.00 | 22.89 | C |
| ATOM | 174 | C   | ILE | A | 25 | 10.125 | -5.571  | 3.747  | 1.00 | 23.14 | C |
| ATOM | 175 | O   | ILE | A | 25 | 10.935 | -5.997  | 4.564  | 1.00 | 20.48 | O |
| ATOM | 176 | CB  | ILE | A | 25 | 8.993  | -3.319  | 3.785  | 1.00 | 19.69 | C |
| ATOM | 177 | CG1 | ILE | A | 25 | 7.714  | -3.751  | 3.081  | 1.00 | 18.78 | C |
| ATOM | 178 | CG2 | ILE | A | 25 | 9.220  | -1.841  | 3.691  | 1.00 | 14.48 | C |
| ATOM | 179 | CD1 | ILE | A | 25 | 6.793  | -2.619  | 2.745  | 1.00 | 19.12 | C |
| ATOM | 180 | N   | ALA | A | 26 | 9.289  | -6.364  | 3.071  | 1.00 | 23.61 | N |
| ATOM | 181 | CA  | ALA | A | 26 | 9.182  | -7.799  | 3.320  | 1.00 | 24.15 | C |
| ATOM | 182 | C   | ALA | A | 26 | 10.563 | -8.405  | 3.520  | 1.00 | 24.53 | C |
| ATOM | 183 | O   | ALA | A | 26 | 10.954 | -8.689  | 4.649  | 1.00 | 24.25 | O |
| ATOM | 184 | CB  | ALA | A | 26 | 8.475  | -8.487  | 2.149  | 1.00 | 23.75 | C |
| ATOM | 185 | N   | PHE | A | 27 | 11.367 | -8.391  | 2.458  | 1.00 | 25.34 | N |
| ATOM | 186 | CA  | PHE | A | 27 | 12.700 | -8.999  | 2.472  | 1.00 | 23.54 | C |
| ATOM | 187 | C   | PHE | A | 27 | 13.657 | -8.301  | 3.432  | 1.00 | 21.84 | C |
| ATOM | 188 | O   | PHE | A | 27 | 14.755 | -8.811  | 3.685  | 1.00 | 21.92 | O |
| ATOM | 189 | CB  | PHE | A | 27 | 13.312 | -8.985  | 1.067  | 1.00 | 22.66 | C |
| ATOM | 190 | CG  | PHE | A | 27 | 12.781 | -10.058 | 0.157  | 1.00 | 21.80 | C |
| ATOM | 191 | CD1 | PHE | A | 27 | 12.742 | -11.375 | 0.562  | 1.00 | 22.31 | C |
| ATOM | 192 | CD2 | PHE | A | 27 | 12.383 | -9.753  | -1.130 | 1.00 | 19.87 | C |
| ATOM | 193 | CE1 | PHE | A | 27 | 12.309 | -12.365 | -0.311 | 1.00 | 23.11 | C |
| ATOM | 194 | CE2 | PHE | A | 27 | 11.955 | -10.733 | -1.999 | 1.00 | 17.81 | C |
| ATOM | 195 | CZ  | PHE | A | 27 | 11.914 | -12.034 | -1.595 | 1.00 | 20.05 | C |
| ATOM | 196 | N   | ALA | A | 28 | 13.258 | -7.145  | 3.956  | 1.00 | 19.72 | N |
| ATOM | 197 | CA  | ALA | A | 28 | 14.162 | -6.345  | 4.775  | 1.00 | 20.10 | C |
| ATOM | 198 | C   | ALA | A | 28 | 13.699 | -5.958  | 6.201  | 1.00 | 21.53 | C |
| ATOM | 199 | O   | ALA | A | 28 | 14.345 | -5.141  | 6.856  | 1.00 | 21.18 | O |
| ATOM | 200 | CB  | ALA | A | 28 | 14.589 | -5.111  | 4.002  | 1.00 | 19.50 | C |
| ATOM | 201 | N   | GLN | A | 29 | 12.557 | -6.484  | 6.644  | 1.00 | 22.14 | N |
| ATOM | 202 | CA  | GLN | A | 29 | 12.293 | -6.695  | 8.068  | 1.00 | 19.68 | C |
| ATOM | 203 | C   | GLN | A | 29 | 12.975 | -8.025  | 8.333  | 1.00 | 22.08 | C |
| ATOM | 204 | O   | GLN | A | 29 | 13.984 | -8.084  | 9.029  | 1.00 | 21.67 | O |
| ATOM | 205 | CB  | GLN | A | 29 | 10.785 | -6.840  | 8.336  | 1.00 | 15.49 | C |
| ATOM | 206 | CG  | GLN | A | 29 | 9.953  | -5.582  | 8.068  | 1.00 | 16.39 | C |
| ATOM | 207 | CD  | GLN | A | 29 | 8.445  | -5.805  | 8.202  | 1.00 | 17.09 | C |
| ATOM | 208 | NE2 | GLN | A | 29 | 7.699  | -4.724  | 8.411  | 1.00 | 12.64 | N |
| ATOM | 209 | OE1 | GLN | A | 29 | 7.959  | -6.934  | 8.092  | 1.00 | 19.84 | O |
| ATOM | 210 | N   | TYR | A | 30 | 12.622 | -8.974  | 7.462  | 1.00 | 24.94 | N |
| ATOM | 211 | CA  | TYR | A | 30 | 13.071 | -10.369 | 7.483  | 1.00 | 23.92 | C |
| ATOM | 212 | C   | TYR | A | 30 | 14.537 | -10.604 | 7.852  | 1.00 | 24.37 | C |
| ATOM | 213 | O   | TYR | A | 30 | 14.813 | -11.198 | 8.911  | 1.00 | 26.54 | O |
| ATOM | 214 | CB  | TYR | A | 30 | 12.785 | -11.008 | 6.129  | 1.00 | 22.66 | C |
| ATOM | 215 | CG  | TYR | A | 30 | 11.456 | -11.702 | 6.058  | 1.00 | 24.59 | C |
| ATOM | 216 | CD1 | TYR | A | 30 | 11.236 | -12.867 | 6.775  | 1.00 | 26.93 | C |
| ATOM | 217 | CD2 | TYR | A | 30 | 10.448 | -11.251 | 5.218  | 1.00 | 25.02 | C |
| ATOM | 218 | CE1 | TYR | A | 30 | 10.052 | -13.584 | 6.651  | 1.00 | 27.16 | C |
| ATOM | 219 | CE2 | TYR | A | 30 | 9.253  | -11.953 | 5.082  | 1.00 | 26.54 | C |
| ATOM | 220 | CZ  | TYR | A | 30 | 9.068  | -13.128 | 5.798  | 1.00 | 27.87 | C |
| ATOM | 221 | OH  | TYR | A | 30 | 7.931  | -13.888 | 5.629  | 1.00 | 28.25 | O |
| ATOM | 222 | N   | LEU | A | 31 | 15.469 | -10.188 | 6.982  | 1.00 | 19.65 | N |
| ATOM | 223 | CA  | LEU | A | 31 | 16.893 | -10.427 | 7.227  | 1.00 | 16.82 | C |
| ATOM | 224 | C   | LEU | A | 31 | 17.698 | -9.262  | 7.838  | 1.00 | 16.70 | C |
| ATOM | 225 | O   | LEU | A | 31 | 18.814 | -9.467  | 8.332  | 1.00 | 16.93 | O |
| ATOM | 226 | CB  | LEU | A | 31 | 17.569 | -10.920 | 5.949  | 1.00 | 18.70 | C |
| ATOM | 227 | CG  | LEU | A | 31 | 17.564 | -12.423 | 5.628  | 1.00 | 18.34 | C |
| ATOM | 228 | CD1 | LEU | A | 31 | 18.751 | -12.798 | 4.728  | 1.00 | 16.70 | C |
| ATOM | 229 | CD2 | LEU | A | 31 | 17.629 | -13.188 | 6.913  | 1.00 | 17.85 | C |
| ATOM | 230 | N   | GLN | A | 32 | 17.196 | -8.040  | 7.703  | 1.00 | 12.99 | N |
| ATOM | 231 | CA  | GLN | A | 32 | 17.563 | -6.922  | 8.579  | 1.00 | 15.39 | C |
| ATOM | 232 | C   | GLN | A | 32 | 19.015 | -6.620  | 9.024  | 1.00 | 16.50 | C |
| ATOM | 233 | O   | GLN | A | 32 | 19.233 | -5.706  | 9.832  | 1.00 | 16.68 | O |
| ATOM | 234 | CB  | GLN | A | 32 | 16.647 | -6.914  | 9.830  | 1.00 | 17.32 | C |
| ATOM | 235 | CG  | GLN | A | 32 | 16.825 | -8.056  | 10.882 | 1.00 | 18.77 | C |
| ATOM | 236 | CD  | GLN | A | 32 | 16.438 | -7.610  | 12.302 | 1.00 | 19.47 | C |

|      |     |     |     |   |    |        |         |        |      |       |     |
|------|-----|-----|-----|---|----|--------|---------|--------|------|-------|-----|
| ATOM | 237 | NE2 | GLN | A | 32 | 17.197 | -8.054  | 13.301 | 1.00 | 11.37 | N   |
| ATOM | 238 | OE1 | GLN | A | 32 | 15.564 | -6.759  | 12.468 | 1.00 | 21.08 | O   |
| ATOM | 239 | N   | GLN | A | 33 | 20.018 | -7.295  | 8.474  | 1.00 | 17.10 | N   |
| ATOM | 240 | CA  | GLN | A | 33 | 21.399 | -6.839  | 8.685  | 1.00 | 18.29 | C   |
| ATOM | 241 | C   | GLN | A | 33 | 22.190 | -6.783  | 7.353  | 1.00 | 19.96 | C   |
| ATOM | 242 | O   | GLN | A | 33 | 22.912 | -5.816  | 7.095  | 1.00 | 20.35 | O   |
| ATOM | 243 | CB  | GLN | A | 33 | 22.119 | -7.705  | 9.752  | 1.00 | 16.98 | C   |
| ATOM | 244 | CG  | GLN | A | 33 | 21.184 | -8.265  | 10.879 | 1.00 | 21.56 | C   |
| ATOM | 245 | CD  | GLN | A | 33 | 21.643 | -7.989  | 12.350 | 1.00 | 23.80 | C   |
| ATOM | 246 | NE2 | GLN | A | 33 | 22.932 | -7.685  | 12.533 | 1.00 | 26.50 | N   |
| ATOM | 247 | OE1 | GLN | A | 33 | 20.834 | -8.040  | 13.295 | 1.00 | 19.44 | O   |
| ATOM | 248 | N   | CYS | A | 34 | 21.943 | -7.745  | 6.458  | 1.00 | 20.58 | N   |
| ATOM | 249 | CA  | CYS | A | 34 | 22.517 | -7.742  | 5.113  | 1.00 | 18.89 | C   |
| ATOM | 250 | C   | CYS | A | 34 | 22.254 | -6.421  | 4.403  | 1.00 | 20.26 | C   |
| ATOM | 251 | O   | CYS | A | 34 | 21.094 | -5.970  | 4.313  | 1.00 | 18.49 | O   |
| ATOM | 252 | CB  | CYS | A | 34 | 21.906 | -8.857  | 4.277  | 1.00 | 17.31 | C   |
| ATOM | 253 | SG  | CYS | A | 34 | 22.155 | -10.502 | 4.964  | 1.00 | 28.19 | S   |
| ATOM | 254 | N   | PRO | A | 35 | 23.309 | -5.836  | 3.795  | 1.00 | 19.86 | N   |
| ATOM | 255 | CA  | PRO | A | 35 | 23.265 | -4.593  | 3.019  | 1.00 | 16.08 | C   |
| ATOM | 256 | C   | PRO | A | 35 | 22.189 | -4.451  | 1.981  | 1.00 | 13.85 | C   |
| ATOM | 257 | O   | PRO | A | 35 | 21.368 | -5.324  | 1.779  | 1.00 | 11.96 | O   |
| ATOM | 258 | CB  | PRO | A | 35 | 24.648 | -4.512  | 2.420  | 1.00 | 14.75 | C   |
| ATOM | 259 | CG  | PRO | A | 35 | 25.491 | -4.991  | 3.508  | 1.00 | 21.60 | C   |
| ATOM | 260 | CD  | PRO | A | 35 | 24.692 | -6.116  | 4.215  | 1.00 | 21.49 | C   |
| ATOM | 261 | N   | PHE | A | 36 | 22.110 | -3.257  | 1.430  | 1.00 | 16.85 | N   |
| ATOM | 262 | CA  | PHE | A | 36 | 20.988 | -2.926  | 0.602  | 1.00 | 17.73 | C   |
| ATOM | 263 | C   | PHE | A | 36 | 20.944 | -3.782  | -0.646 | 1.00 | 20.98 | C   |
| ATOM | 264 | O   | PHE | A | 36 | 20.009 | -4.576  | -0.789 | 1.00 | 24.39 | O   |
| ATOM | 265 | CB  | PHE | A | 36 | 20.979 | -1.443  | 0.233  | 1.00 | 18.53 | C   |
| ATOM | 266 | CG  | PHE | A | 36 | 19.674 | -0.996  | -0.359 | 1.00 | 19.96 | C   |
| ATOM | 267 | CD1 | PHE | A | 36 | 18.482 | -1.376  | 0.223  | 1.00 | 18.68 | C   |
| ATOM | 268 | CD2 | PHE | A | 36 | 19.632 | -0.366  | -1.579 | 1.00 | 20.99 | C   |
| ATOM | 269 | CE1 | PHE | A | 36 | 17.308 | -1.164  | -0.391 | 1.00 | 17.22 | C   |
| ATOM | 270 | CE2 | PHE | A | 36 | 18.443 | -0.149  | -2.195 | 1.00 | 19.46 | C   |
| ATOM | 271 | CZ  | PHE | A | 36 | 17.282 | -0.559  | -1.600 | 1.00 | 19.20 | C   |
| ATOM | 272 | N   | GLU | A | 37 | 21.990 | -3.721  | -1.482 | 1.00 | 21.10 | N   |
| ATOM | 273 | CA  | GLU | A | 37 | 21.895 | -4.190  | -2.874 | 1.00 | 20.88 | C   |
| ATOM | 274 | C   | GLU | A | 37 | 21.529 | -5.668  | -3.024 | 1.00 | 20.33 | C   |
| ATOM | 275 | O   | GLU | A | 37 | 20.863 | -6.060  | -3.979 | 1.00 | 18.29 | O   |
| ATOM | 276 | CB  | GLU | A | 37 | 23.192 | -3.914  | -3.617 | 1.00 | 22.94 | C   |
| ATOM | 277 | CG  | GLU | A | 37 | 23.564 | -2.453  | -3.675 | 1.00 | 24.70 | C   |
| ATOM | 278 | CD  | GLU | A | 37 | 24.725 | -2.103  | -2.759 | 1.00 | 27.37 | C   |
| ATOM | 279 | OE1 | GLU | A | 37 | 25.368 | -3.042  | -2.215 | 1.00 | 26.97 | O   |
| ATOM | 280 | OE2 | GLU | A | 37 | 24.966 | -0.880  | -2.567 | 1.00 | 25.74 | O1- |
| ATOM | 281 | N   | ASP | A | 38 | 22.115 | -6.488  | -2.161 | 1.00 | 20.03 | N   |
| ATOM | 282 | CA  | ASP | A | 38 | 21.747 | -7.891  | -1.979 | 1.00 | 18.25 | C   |
| ATOM | 283 | C   | ASP | A | 38 | 20.224 | -8.028  | -1.946 | 1.00 | 20.19 | C   |
| ATOM | 284 | O   | ASP | A | 38 | 19.615 | -8.679  | -2.800 | 1.00 | 17.87 | O   |
| ATOM | 285 | CB  | ASP | A | 38 | 22.348 | -8.378  | -0.663 | 1.00 | 16.94 | C   |
| ATOM | 286 | CG  | ASP | A | 38 | 23.796 | -7.902  | -0.463 | 1.00 | 18.58 | C   |
| ATOM | 287 | OD1 | ASP | A | 38 | 24.047 | -6.683  | -0.383 | 1.00 | 14.38 | O   |
| ATOM | 288 | OD2 | ASP | A | 38 | 24.696 | -8.758  | -0.380 | 1.00 | 22.12 | O1- |
| ATOM | 289 | N   | HIS | A | 39 | 19.612 | -7.271  | -1.038 | 1.00 | 23.52 | N   |
| ATOM | 290 | CA  | HIS | A | 39 | 18.160 | -7.214  | -0.882 | 1.00 | 22.04 | C   |
| ATOM | 291 | C   | HIS | A | 39 | 17.507 | -6.768  | -2.173 | 1.00 | 20.54 | C   |
| ATOM | 292 | O   | HIS | A | 39 | 16.482 | -7.318  | -2.558 | 1.00 | 21.75 | O   |
| ATOM | 293 | CB  | HIS | A | 39 | 17.765 | -6.228  | 0.235  | 1.00 | 22.52 | C   |
| ATOM | 294 | CG  | HIS | A | 39 | 17.962 | -6.765  | 1.616  | 1.00 | 21.90 | C   |
| ATOM | 295 | CD2 | HIS | A | 39 | 17.572 | -7.930  | 2.183  | 1.00 | 22.42 | C   |
| ATOM | 296 | ND1 | HIS | A | 39 | 18.606 | -6.054  | 2.609  | 1.00 | 23.78 | N   |
| ATOM | 297 | CE1 | HIS | A | 39 | 18.596 | -6.759  | 3.729  | 1.00 | 21.46 | C   |
| ATOM | 298 | NE2 | HIS | A | 39 | 17.980 | -7.900  | 3.492  | 1.00 | 22.35 | N   |
| ATOM | 299 | N   | VAL | A | 40 | 18.052 | -5.725  | -2.797 | 1.00 | 17.74 | N   |
| ATOM | 300 | CA  | VAL | A | 40 | 17.394 | -5.125  | -3.959 | 1.00 | 17.68 | C   |
| ATOM | 301 | C   | VAL | A | 40 | 17.509 | -5.956  | -5.264 | 1.00 | 21.04 | C   |
| ATOM | 302 | O   | VAL | A | 40 | 16.509 | -6.136  | -5.967 | 1.00 | 22.22 | O   |
| ATOM | 303 | CB  | VAL | A | 40 | 17.863 | -3.667  | -4.225 | 1.00 | 15.09 | C   |
| ATOM | 304 | CG1 | VAL | A | 40 | 16.681 | -2.748  | -4.220 | 1.00 | 15.66 | C   |
| ATOM | 305 | CG2 | VAL | A | 40 | 18.816 | -3.204  | -3.185 | 1.00 | 12.61 | C   |
| ATOM | 306 | N   | LYS | A | 41 | 18.664 | -6.575  | -5.518 | 1.00 | 21.82 | N   |
| ATOM | 307 | CA  | LYS | A | 41 | 18.789 | -7.519  | -6.630 | 1.00 | 21.46 | C   |

|      |     |     |     |   |    |        |         |         |      |       |     |
|------|-----|-----|-----|---|----|--------|---------|---------|------|-------|-----|
| ATOM | 308 | C   | LYS | A | 41 | 17.644 | -8.486  | -6.523  | 1.00 | 21.01 | C   |
| ATOM | 309 | O   | LYS | A | 41 | 16.769 | -8.480  | -7.376  | 1.00 | 23.65 | O   |
| ATOM | 310 | CB  | LYS | A | 41 | 20.108 | -8.290  | -6.546  | 1.00 | 25.68 | C   |
| ATOM | 311 | CG  | LYS | A | 41 | 20.620 | -8.833  | -7.888  | 1.00 | 27.49 | C   |
| ATOM | 312 | CD  | LYS | A | 41 | 22.165 | -8.736  | -8.020  | 1.00 | 23.95 | C   |
| ATOM | 313 | CE  | LYS | A | 41 | 22.573 | -8.660  | -9.504  | 1.00 | 21.47 | C   |
| ATOM | 314 | NZ  | LYS | A | 41 | 23.966 | -8.207  | -9.722  | 1.00 | 16.15 | N1+ |
| ATOM | 315 | N   | LEU | A | 42 | 17.495 | -9.053  | -5.324  | 1.00 | 21.14 | N   |
| ATOM | 316 | CA  | LEU | A | 42 | 16.451 | -10.045 | -5.020  | 1.00 | 20.21 | C   |
| ATOM | 317 | C   | LEU | A | 42 | 15.021 | -9.526  | -5.193  | 1.00 | 18.80 | C   |
| ATOM | 318 | O   | LEU | A | 42 | 14.119 | -10.252 | -5.621  | 1.00 | 14.06 | O   |
| ATOM | 319 | CB  | LEU | A | 42 | 16.653 | -10.582 | -3.604  | 1.00 | 20.68 | C   |
| ATOM | 320 | CG  | LEU | A | 42 | 18.057 | -11.154 | -3.410  | 1.00 | 23.93 | C   |
| ATOM | 321 | CD1 | LEU | A | 42 | 18.337 | -11.363 | -1.954  | 1.00 | 26.48 | C   |
| ATOM | 322 | CD2 | LEU | A | 42 | 18.195 | -12.468 | -4.155  | 1.00 | 27.94 | C   |
| ATOM | 323 | N   | VAL | A | 43 | 14.828 | -8.248  | -4.920  | 1.00 | 20.91 | N   |
| ATOM | 324 | CA  | VAL | A | 43 | 13.557 | -7.646  | -5.243  | 1.00 | 25.09 | C   |
| ATOM | 325 | C   | VAL | A | 43 | 13.455 | -7.618  | -6.756  | 1.00 | 24.80 | C   |
| ATOM | 326 | O   | VAL | A | 43 | 12.655 | -8.371  | -7.319  | 1.00 | 24.61 | O   |
| ATOM | 327 | CB  | VAL | A | 43 | 13.424 | -6.220  | -4.671  | 1.00 | 29.14 | C   |
| ATOM | 328 | CG1 | VAL | A | 43 | 12.078 | -5.628  | -5.086  | 1.00 | 29.20 | C   |
| ATOM | 329 | CG2 | VAL | A | 43 | 13.555 | -6.252  | -3.122  | 1.00 | 29.89 | C   |
| ATOM | 330 | N   | ASN | A | 44 | 14.422 | -6.952  | -7.393  | 1.00 | 24.28 | N   |
| ATOM | 331 | CA  | ASN | A | 44 | 14.472 | -6.794  | -8.849  | 1.00 | 24.67 | C   |
| ATOM | 332 | C   | ASN | A | 44 | 13.983 | -8.073  | -9.527  | 1.00 | 25.13 | C   |
| ATOM | 333 | O   | ASN | A | 44 | 13.160 | -8.021  | -10.443 | 1.00 | 27.80 | O   |
| ATOM | 334 | CB  | ASN | A | 44 | 15.908 | -6.461  | -9.325  | 1.00 | 25.32 | C   |
| ATOM | 335 | CG  | ASN | A | 44 | 16.357 | -5.040  | -8.947  | 1.00 | 29.48 | C   |
| ATOM | 336 | ND2 | ASN | A | 44 | 15.803 | -4.049  | -9.631  | 1.00 | 31.83 | N   |
| ATOM | 337 | OD1 | ASN | A | 44 | 17.192 | -4.838  | -8.052  | 1.00 | 30.17 | O   |
| ATOM | 338 | N   | GLU | A | 45 | 14.326 | -9.217  | -8.942  | 1.00 | 24.11 | N   |
| ATOM | 339 | CA  | GLU | A | 45 | 14.019 | -10.503 | -9.553  | 1.00 | 25.12 | C   |
| ATOM | 340 | C   | GLU | A | 45 | 12.569 | -10.992 | -9.356  | 1.00 | 26.68 | C   |
| ATOM | 341 | O   | GLU | A | 45 | 11.931 | -11.464 | -10.315 | 1.00 | 26.81 | O   |
| ATOM | 342 | CB  | GLU | A | 45 | 15.015 | -11.547 | -9.043  | 1.00 | 22.72 | C   |
| ATOM | 343 | CG  | GLU | A | 45 | 16.351 | -11.537 | -9.773  | 1.00 | 16.42 | C   |
| ATOM | 344 | CD  | GLU | A | 45 | 17.486 | -11.808 | -8.848  | 1.00 | 12.41 | C   |
| ATOM | 345 | OE1 | GLU | A | 45 | 17.454 | -12.854 | -8.182  | 1.00 | 8.42  | O   |
| ATOM | 346 | OE2 | GLU | A | 45 | 18.353 | -10.928 | -8.705  | 1.00 | 12.61 | O1- |
| ATOM | 347 | N   | VAL | A | 46 | 12.105 | -10.980 | -8.100  | 1.00 | 28.78 | N   |
| ATOM | 348 | CA  | VAL | A | 46 | 10.677 | -11.141 | -7.758  | 1.00 | 27.45 | C   |
| ATOM | 349 | C   | VAL | A | 46 | 9.849  | -10.270 | -8.670  | 1.00 | 25.30 | C   |
| ATOM | 350 | O   | VAL | A | 46 | 8.937  | -10.754 | -9.344  | 1.00 | 24.88 | O   |
| ATOM | 351 | CB  | VAL | A | 46 | 10.352 | -10.637 | -6.332  | 1.00 | 28.88 | C   |
| ATOM | 352 | CG1 | VAL | A | 46 | 8.928  | -11.039 | -5.958  | 1.00 | 28.73 | C   |
| ATOM | 353 | CG2 | VAL | A | 46 | 11.381 | -11.152 | -5.327  | 1.00 | 30.37 | C   |
| ATOM | 354 | N   | THR | A | 47 | 10.115 | -8.966  | -8.588  | 1.00 | 22.75 | N   |
| ATOM | 355 | CA  | THR | A | 47 | 9.506  | -7.984  | -9.460  | 1.00 | 21.85 | C   |
| ATOM | 356 | C   | THR | A | 47 | 9.418  | -8.500  | -10.909 | 1.00 | 24.34 | C   |
| ATOM | 357 | O   | THR | A | 47 | 8.328  | -8.429  | -11.517 | 1.00 | 23.89 | O   |
| ATOM | 358 | CB  | THR | A | 47 | 10.293 | -6.653  | -9.427  | 1.00 | 20.39 | C   |
| ATOM | 359 | CG2 | THR | A | 47 | 9.430  | -5.527  | -9.894  | 1.00 | 22.88 | C   |
| ATOM | 360 | OG1 | THR | A | 47 | 10.696 | -6.351  | -8.090  | 1.00 | 18.42 | O   |
| ATOM | 361 | N   | GLU | A | 48 | 10.502 | -9.131  | -11.402 | 1.00 | 24.26 | N   |
| ATOM | 362 | CA  | GLU | A | 48 | 10.540 | -9.677  | -12.778 | 1.00 | 25.92 | C   |
| ATOM | 363 | C   | GLU | A | 48 | 9.432  | -10.732 | -13.024 | 1.00 | 26.47 | C   |
| ATOM | 364 | O   | GLU | A | 48 | 8.254  | -10.386 | -13.267 | 1.00 | 21.91 | O   |
| ATOM | 365 | CB  | GLU | A | 48 | 11.920 | -10.285 | -13.101 | 1.00 | 25.59 | C   |
| ATOM | 366 | CG  | GLU | A | 48 | 12.994 | -9.275  | -13.584 | 1.00 | 34.29 | C   |
| ATOM | 367 | CD  | GLU | A | 48 | 13.681 | -9.665  | -14.925 | 1.00 | 37.71 | C   |
| ATOM | 368 | OE1 | GLU | A | 48 | 14.662 | -10.459 | -14.916 | 1.00 | 37.81 | O   |
| ATOM | 369 | OE2 | GLU | A | 48 | 13.290 | -9.109  | -15.986 | 1.00 | 39.96 | O1- |
| ATOM | 370 | N   | PHE | A | 49 | 9.865  | -11.982 | -13.195 | 1.00 | 26.44 | N   |
| ATOM | 371 | CA  | PHE | A | 49 | 9.041  | -13.162 | -12.909 | 1.00 | 26.68 | C   |
| ATOM | 372 | C   | PHE | A | 49 | 7.528  | -12.915 | -12.813 | 1.00 | 27.60 | C   |
| ATOM | 373 | O   | PHE | A | 49 | 6.732  | -13.630 | -13.444 | 1.00 | 27.93 | O   |
| ATOM | 374 | CB  | PHE | A | 49 | 9.534  | -13.796 | -11.611 | 1.00 | 23.99 | C   |
| ATOM | 375 | CG  | PHE | A | 49 | 9.256  | -15.241 | -11.510 | 1.00 | 22.41 | C   |
| ATOM | 376 | CD1 | PHE | A | 49 | 8.042  | -15.760 | -11.905 | 1.00 | 25.30 | C   |
| ATOM | 377 | CD2 | PHE | A | 49 | 10.177 | -16.079 | -10.948 | 1.00 | 23.15 | C   |
| ATOM | 378 | CE1 | PHE | A | 49 | 7.754  | -17.099 | -11.725 | 1.00 | 26.44 | C   |

|      |     |     |     |   |    |        |         |         |      |       |     |
|------|-----|-----|-----|---|----|--------|---------|---------|------|-------|-----|
| ATOM | 379 | CE2 | PHE | A | 49 | 9.893  | -17.410 | -10.766 | 1.00 | 26.07 | C   |
| ATOM | 380 | CZ  | PHE | A | 49 | 8.682  | -17.917 | -11.151 | 1.00 | 23.64 | C   |
| ATOM | 381 | N   | ALA | A | 50 | 7.147  | -12.051 | -11.869 | 1.00 | 28.68 | N   |
| ATOM | 382 | CA  | ALA | A | 50 | 5.757  | -11.693 | -11.611 | 1.00 | 26.29 | C   |
| ATOM | 383 | C   | ALA | A | 50 | 5.093  | -11.370 | -12.939 | 1.00 | 26.64 | C   |
| ATOM | 384 | O   | ALA | A | 50 | 4.068  | -11.963 | -13.302 | 1.00 | 25.34 | O   |
| ATOM | 385 | CB  | ALA | A | 50 | 5.717  | -10.487 | -10.704 | 1.00 | 22.98 | C   |
| ATOM | 386 | N   | LYS | A | 51 | 5.773  | -10.515 | -13.703 | 1.00 | 26.55 | N   |
| ATOM | 387 | CA  | LYS | A | 51 | 5.334  | -10.065 | -15.024 | 1.00 | 24.67 | C   |
| ATOM | 388 | C   | LYS | A | 51 | 5.138  | -11.225 | -15.983 | 1.00 | 23.19 | C   |
| ATOM | 389 | O   | LYS | A | 51 | 4.298  | -11.140 | -16.871 | 1.00 | 22.00 | O   |
| ATOM | 390 | CB  | LYS | A | 51 | 6.366  | -9.099  | -15.636 | 1.00 | 25.82 | C   |
| ATOM | 391 | CG  | LYS | A | 51 | 6.392  | -7.692  | -15.057 | 1.00 | 20.83 | C   |
| ATOM | 392 | CD  | LYS | A | 51 | 7.753  | -7.062  | -15.237 | 1.00 | 15.07 | C   |
| ATOM | 393 | CE  | LYS | A | 51 | 7.799  | -5.778  | -14.475 | 1.00 | 17.03 | C   |
| ATOM | 394 | NZ  | LYS | A | 51 | 7.346  | -5.991  | -13.051 | 1.00 | 19.85 | N1+ |
| ATOM | 395 | N   | THR | A | 52 | 5.942  | -12.276 | -15.844 | 1.00 | 20.21 | N   |
| ATOM | 396 | CA  | THR | A | 52 | 5.860  | -13.406 | -16.750 | 1.00 | 20.84 | C   |
| ATOM | 397 | C   | THR | A | 52 | 4.763  | -14.438 | -16.407 | 1.00 | 23.73 | C   |
| ATOM | 398 | O   | THR | A | 52 | 4.255  | -15.121 | -17.310 | 1.00 | 25.44 | O   |
| ATOM | 399 | CB  | THR | A | 52 | 7.233  | -14.084 | -16.902 | 1.00 | 18.84 | C   |
| ATOM | 400 | CG2 | THR | A | 52 | 7.234  | -15.510 | -16.319 | 1.00 | 15.42 | C   |
| ATOM | 401 | OG1 | THR | A | 52 | 7.585  | -14.107 | -18.292 | 1.00 | 18.38 | O   |
| ATOM | 402 | N   | CYS | A | 53 | 4.305  | -14.468 | -15.154 | 1.00 | 24.15 | N   |
| ATOM | 403 | CA  | CYS | A | 53 | 3.020  | -15.113 | -14.852 | 1.00 | 23.39 | C   |
| ATOM | 404 | C   | CYS | A | 53 | 1.841  | -14.134 | -15.054 | 1.00 | 21.30 | C   |
| ATOM | 405 | O   | CYS | A | 53 | 0.704  | -14.552 | -15.268 | 1.00 | 21.30 | O   |
| ATOM | 406 | CB  | CYS | A | 53 | 3.000  | -15.710 | -13.428 | 1.00 | 24.03 | C   |
| ATOM | 407 | SG  | CYS | A | 53 | 4.336  | -16.896 | -13.023 | 1.00 | 22.23 | S   |
| ATOM | 408 | N   | VAL | A | 54 | 2.135  | -12.843 | -15.077 | 1.00 | 19.83 | N   |
| ATOM | 409 | CA  | VAL | A | 54 | 1.222  | -11.856 | -15.647 | 1.00 | 23.85 | C   |
| ATOM | 410 | C   | VAL | A | 54 | 0.895  | -12.233 | -17.099 | 1.00 | 24.27 | C   |
| ATOM | 411 | O   | VAL | A | 54 | -0.282 | -12.282 | -17.504 | 1.00 | 24.50 | O   |
| ATOM | 412 | CB  | VAL | A | 54 | 1.865  | -10.426 | -15.619 | 1.00 | 26.97 | C   |
| ATOM | 413 | CG1 | VAL | A | 54 | 1.309  | -9.538  | -16.746 | 1.00 | 26.12 | C   |
| ATOM | 414 | CG2 | VAL | A | 54 | 1.638  | -9.771  | -14.250 | 1.00 | 30.36 | C   |
| ATOM | 415 | N   | ALA | A | 55 | 1.952  | -12.457 | -17.881 | 1.00 | 22.66 | N   |
| ATOM | 416 | CA  | ALA | A | 55 | 1.845  | -12.830 | -19.291 | 1.00 | 20.65 | C   |
| ATOM | 417 | C   | ALA | A | 55 | 0.971  | -14.066 | -19.412 | 1.00 | 21.32 | C   |
| ATOM | 418 | O   | ALA | A | 55 | 0.002  | -14.111 | -20.189 | 1.00 | 20.09 | O   |
| ATOM | 419 | CB  | ALA | A | 55 | 3.235  | -13.120 | -19.850 | 1.00 | 18.03 | C   |
| ATOM | 420 | N   | ASP | A | 56 | 1.236  | -14.994 | -18.498 | 1.00 | 22.03 | N   |
| ATOM | 421 | CA  | ASP | A | 56 | 0.765  | -16.364 | -18.591 | 1.00 | 20.78 | C   |
| ATOM | 422 | C   | ASP | A | 56 | 0.823  | -16.974 | -17.200 | 1.00 | 17.21 | C   |
| ATOM | 423 | O   | ASP | A | 56 | 1.892  | -17.299 | -16.698 | 1.00 | 13.60 | O   |
| ATOM | 424 | CB  | ASP | A | 56 | 1.667  | -17.168 | -19.555 | 1.00 | 21.11 | C   |
| ATOM | 425 | CG  | ASP | A | 56 | 0.882  | -17.885 | -20.641 | 1.00 | 20.85 | C   |
| ATOM | 426 | OD1 | ASP | A | 56 | -0.136 | -17.326 | -21.131 | 1.00 | 18.50 | O   |
| ATOM | 427 | OD2 | ASP | A | 56 | 1.283  | -19.021 | -20.979 | 1.00 | 19.93 | O1- |
| ATOM | 428 | N   | GLU | A | 57 | -0.326 | -17.055 | -16.554 | 1.00 | 17.39 | N   |
| ATOM | 429 | CA  | GLU | A | 57 | -0.486 | -17.952 | -15.418 | 1.00 | 19.41 | C   |
| ATOM | 430 | C   | GLU | A | 57 | 0.281  | -19.246 | -15.683 | 1.00 | 19.69 | C   |
| ATOM | 431 | O   | GLU | A | 57 | 1.357  | -19.437 | -15.115 | 1.00 | 18.89 | O   |
| ATOM | 432 | CB  | GLU | A | 57 | -1.968 | -18.291 | -15.198 | 1.00 | 21.01 | C   |
| ATOM | 433 | CG  | GLU | A | 57 | -2.926 | -17.181 | -15.550 | 1.00 | 18.07 | C   |
| ATOM | 434 | CD  | GLU | A | 57 | -3.521 | -16.521 | -14.336 | 1.00 | 21.55 | C   |
| ATOM | 435 | OE1 | GLU | A | 57 | -2.782 | -15.874 | -13.551 | 1.00 | 18.91 | O   |
| ATOM | 436 | OE2 | GLU | A | 57 | -4.756 | -16.620 | -14.200 | 1.00 | 23.50 | O1- |
| ATOM | 437 | N   | SER | A | 58 | -0.138 | -19.944 | -16.752 | 1.00 | 20.54 | N   |
| ATOM | 438 | CA  | SER | A | 58 | 0.233  | -21.343 | -17.074 | 1.00 | 18.77 | C   |
| ATOM | 439 | C   | SER | A | 58 | 1.734  | -21.685 | -17.200 | 1.00 | 16.17 | C   |
| ATOM | 440 | O   | SER | A | 58 | 2.107  | -22.848 | -17.305 | 1.00 | 12.41 | O   |
| ATOM | 441 | CB  | SER | A | 58 | -0.468 | -21.771 | -18.367 | 1.00 | 19.91 | C   |
| ATOM | 442 | OG  | SER | A | 58 | -1.586 | -20.943 | -18.670 | 1.00 | 22.34 | O   |
| ATOM | 443 | N   | ALA | A | 59 | 2.580  | -20.666 | -17.191 | 1.00 | 16.30 | N   |
| ATOM | 444 | CA  | ALA | A | 59 | 4.000  | -20.840 | -17.363 | 1.00 | 19.02 | C   |
| ATOM | 445 | C   | ALA | A | 59 | 4.585  | -21.590 | -16.177 | 1.00 | 21.95 | C   |
| ATOM | 446 | O   | ALA | A | 59 | 4.252  | -21.262 | -15.033 | 1.00 | 23.97 | O   |
| ATOM | 447 | CB  | ALA | A | 59 | 4.640  | -19.489 | -17.474 | 1.00 | 22.09 | C   |
| ATOM | 448 | N   | GLU | A | 60 | 5.602  | -22.419 | -16.441 | 1.00 | 22.59 | N   |
| ATOM | 449 | CA  | GLU | A | 60 | 6.267  | -23.242 | -15.417 | 1.00 | 22.93 | C   |

|      |     |     |     |   |    |        |         |         |      |       |     |
|------|-----|-----|-----|---|----|--------|---------|---------|------|-------|-----|
| ATOM | 450 | C   | GLU | A | 60 | 6.511  | -22.498 | -14.113 | 1.00 | 24.76 | C   |
| ATOM | 451 | O   | GLU | A | 60 | 6.901  | -21.338 | -14.122 | 1.00 | 28.75 | O   |
| ATOM | 452 | CB  | GLU | A | 60 | 7.611  | -23.778 | -15.934 | 1.00 | 19.81 | C   |
| ATOM | 453 | CG  | GLU | A | 60 | 8.417  | -24.596 | -14.918 | 1.00 | 16.82 | C   |
| ATOM | 454 | CD  | GLU | A | 60 | 9.732  | -25.160 | -15.474 | 1.00 | 17.21 | C   |
| ATOM | 455 | OE1 | GLU | A | 60 | 10.733 | -24.414 | -15.489 | 1.00 | 14.77 | O   |
| ATOM | 456 | OE2 | GLU | A | 60 | 9.794  | -26.376 | -15.792 | 1.00 | 16.15 | O1- |
| ATOM | 457 | N   | ASN | A | 61 | 6.248  | -23.175 | -13.002 | 1.00 | 25.15 | N   |
| ATOM | 458 | CA  | ASN | A | 61 | 6.546  | -22.712 | -11.638 | 1.00 | 26.26 | C   |
| ATOM | 459 | C   | ASN | A | 61 | 5.873  | -21.448 | -11.121 | 1.00 | 26.29 | C   |
| ATOM | 460 | O   | ASN | A | 61 | 6.007  | -21.124 | -9.945  | 1.00 | 26.16 | O   |
| ATOM | 461 | CB  | ASN | A | 61 | 8.054  | -22.619 | -11.376 | 1.00 | 25.05 | C   |
| ATOM | 462 | CG  | ASN | A | 61 | 8.730  | -21.612 | -12.252 | 1.00 | 25.32 | C   |
| ATOM | 463 | ND2 | ASN | A | 61 | 8.313  | -20.363 | -12.155 | 1.00 | 21.35 | N   |
| ATOM | 464 | OD1 | ASN | A | 61 | 9.503  | -21.985 | -13.129 | 1.00 | 26.74 | O   |
| ATOM | 465 | N   | CYS | A | 62 | 5.005  | -20.840 | -11.915 | 1.00 | 27.22 | N   |
| ATOM | 466 | CA  | CYS | A | 62 | 4.054  | -19.901 | -11.338 | 1.00 | 27.20 | C   |
| ATOM | 467 | C   | CYS | A | 62 | 3.419  | -20.547 | -10.106 | 1.00 | 27.53 | C   |
| ATOM | 468 | O   | CYS | A | 62 | 3.560  | -20.010 | -9.012  | 1.00 | 27.96 | O   |
| ATOM | 469 | CB  | CYS | A | 62 | 3.001  | -19.538 | -12.379 | 1.00 | 27.41 | C   |
| ATOM | 470 | SG  | CYS | A | 62 | 3.731  | -18.673 | -13.817 | 1.00 | 27.27 | S   |
| ATOM | 471 | N   | ASP | A | 63 | 3.166  | -21.853 | -10.247 | 1.00 | 29.32 | N   |
| ATOM | 472 | CA  | ASP | A | 63 | 2.519  | -22.729 | -9.259  | 1.00 | 29.88 | C   |
| ATOM | 473 | C   | ASP | A | 63 | 3.127  | -22.814 | -7.853  | 1.00 | 31.82 | C   |
| ATOM | 474 | O   | ASP | A | 63 | 2.702  | -23.660 | -7.046  | 1.00 | 30.96 | O   |
| ATOM | 475 | CB  | ASP | A | 63 | 2.437  | -24.142 | -9.824  | 1.00 | 29.57 | C   |
| ATOM | 476 | CG  | ASP | A | 63 | 1.214  | -24.355 | -10.687 | 1.00 | 31.17 | C   |
| ATOM | 477 | OD1 | ASP | A | 63 | 1.082  | -23.702 | -11.758 | 1.00 | 32.77 | O   |
| ATOM | 478 | OD2 | ASP | A | 63 | 0.381  | -25.200 | -10.295 | 1.00 | 32.47 | O1- |
| ATOM | 479 | N   | LYS | A | 64 | 4.183  | -22.033 | -7.600  | 1.00 | 33.23 | N   |
| ATOM | 480 | CA  | LYS | A | 64 | 4.695  | -21.785 | -6.244  | 1.00 | 30.18 | C   |
| ATOM | 481 | C   | LYS | A | 64 | 3.561  | -21.200 | -5.372  | 1.00 | 29.80 | C   |
| ATOM | 482 | O   | LYS | A | 64 | 2.803  | -20.316 | -5.817  | 1.00 | 28.83 | O   |
| ATOM | 483 | CB  | LYS | A | 64 | 5.864  | -20.782 | -6.308  | 1.00 | 27.37 | C   |
| ATOM | 484 | CG  | LYS | A | 64 | 7.257  | -21.397 | -6.361  | 1.00 | 25.95 | C   |
| ATOM | 485 | CD  | LYS | A | 64 | 7.352  | -22.527 | -7.386  | 1.00 | 27.90 | C   |
| ATOM | 486 | CE  | LYS | A | 64 | 8.191  | -23.714 | -6.889  | 1.00 | 28.98 | C   |
| ATOM | 487 | NZ  | LYS | A | 64 | 9.640  | -23.392 | -6.604  | 1.00 | 27.67 | N1+ |
| ATOM | 488 | N   | SER | A | 65 | 3.474  | -21.647 | -4.120  | 1.00 | 28.75 | N   |
| ATOM | 489 | CA  | SER | A | 65 | 2.650  | -20.934 | -3.136  | 1.00 | 27.25 | C   |
| ATOM | 490 | C   | SER | A | 65 | 3.419  | -19.725 | -2.546  | 1.00 | 25.40 | C   |
| ATOM | 491 | O   | SER | A | 65 | 4.196  | -19.869 | -1.583  | 1.00 | 21.94 | O   |
| ATOM | 492 | CB  | SER | A | 65 | 2.188  | -21.897 | -2.019  | 1.00 | 28.94 | C   |
| ATOM | 493 | OG  | SER | A | 65 | 0.824  | -22.307 | -2.198  | 1.00 | 26.21 | O   |
| ATOM | 494 | N   | LEU | A | 66 | 3.329  | -18.597 | -3.256  | 1.00 | 21.69 | N   |
| ATOM | 495 | CA  | LEU | A | 66 | 3.971  | -17.330 | -2.891  | 1.00 | 18.29 | C   |
| ATOM | 496 | C   | LEU | A | 66 | 5.229  | -17.507 | -2.069  | 1.00 | 20.23 | C   |
| ATOM | 497 | O   | LEU | A | 66 | 6.283  | -17.683 | -2.652  | 1.00 | 23.75 | O   |
| ATOM | 498 | CB  | LEU | A | 66 | 2.982  | -16.401 | -2.180  | 1.00 | 12.64 | C   |
| ATOM | 499 | CG  | LEU | A | 66 | 3.160  | -14.880 | -2.253  | 1.00 | 5.07  | C   |
| ATOM | 500 | CD1 | LEU | A | 66 | 4.592  | -14.537 | -2.380  | 1.00 | 2.40  | C   |
| ATOM | 501 | CD2 | LEU | A | 66 | 2.384  | -14.296 | -3.399  | 1.00 | 2.17  | C   |
| ATOM | 502 | N   | HIS | A | 67 | 5.083  | -17.646 | -0.749  | 1.00 | 23.72 | N   |
| ATOM | 503 | CA  | HIS | A | 67 | 6.208  | -17.826 | 0.192   | 1.00 | 25.77 | C   |
| ATOM | 504 | C   | HIS | A | 67 | 7.266  | -18.712 | -0.428  | 1.00 | 27.03 | C   |
| ATOM | 505 | O   | HIS | A | 67 | 8.407  | -18.292 | -0.612  | 1.00 | 28.17 | O   |
| ATOM | 506 | CB  | HIS | A | 67 | 5.757  | -18.505 | 1.505   | 1.00 | 27.30 | C   |
| ATOM | 507 | CG  | HIS | A | 67 | 5.053  | -17.596 | 2.474   | 1.00 | 28.03 | C   |
| ATOM | 508 | CD2 | HIS | A | 67 | 5.372  | -16.363 | 2.940   | 1.00 | 25.15 | C   |
| ATOM | 509 | ND1 | HIS | A | 67 | 3.955  | -18.009 | 3.206   | 1.00 | 25.30 | N   |
| ATOM | 510 | CE1 | HIS | A | 67 | 3.645  | -17.076 | 4.091   | 1.00 | 24.34 | C   |
| ATOM | 511 | NE2 | HIS | A | 67 | 4.488  | -16.070 | 3.947   | 1.00 | 23.45 | N   |
| ATOM | 512 | N   | THR | A | 68 | 6.833  | -19.877 | -0.895  | 1.00 | 28.20 | N   |
| ATOM | 513 | CA  | THR | A | 68 | 7.749  | -20.853 | -1.467  | 1.00 | 31.25 | C   |
| ATOM | 514 | C   | THR | A | 68 | 8.754  | -20.271 | -2.461  | 1.00 | 32.00 | C   |
| ATOM | 515 | O   | THR | A | 68 | 9.905  | -20.750 | -2.549  | 1.00 | 31.36 | O   |
| ATOM | 516 | CB  | THR | A | 68 | 6.986  | -21.972 | -2.142  | 1.00 | 32.39 | C   |
| ATOM | 517 | CG2 | THR | A | 68 | 7.624  | -23.327 | -1.793  | 1.00 | 31.68 | C   |
| ATOM | 518 | OG1 | THR | A | 68 | 5.617  | -21.933 | -1.697  | 1.00 | 35.75 | O   |
| ATOM | 519 | N   | LEU | A | 69 | 8.353  | -19.227 | -3.185  | 1.00 | 31.87 | N   |
| ATOM | 520 | CA  | LEU | A | 69 | 9.340  | -18.500 | -3.974  | 1.00 | 33.65 | C   |



|      |     |     |     |   |    |        |         |        |      |       |     |
|------|-----|-----|-----|---|----|--------|---------|--------|------|-------|-----|
| ATOM | 521 | C   | LEU | A | 69 | 10.314 | -17.880 | -2.982 | 1.00 | 32.74 | C   |
| ATOM | 522 | O   | LEU | A | 69 | 11.288 | -18.548 | -2.631 | 1.00 | 32.06 | O   |
| ATOM | 523 | CB  | LEU | A | 69 | 8.705  | -17.444 | -4.905 | 1.00 | 34.67 | C   |
| ATOM | 524 | CG  | LEU | A | 69 | 9.426  | -17.171 | -6.259 | 1.00 | 34.79 | C   |
| ATOM | 525 | CD1 | LEU | A | 69 | 10.395 | -15.967 | -6.148 | 1.00 | 32.65 | C   |
| ATOM | 526 | CD2 | LEU | A | 69 | 10.174 | -18.427 | -6.738 | 1.00 | 31.64 | C   |
| ATOM | 527 | N   | PHE | A | 70 | 9.943  | -16.747 | -2.374 | 1.00 | 30.96 | N   |
| ATOM | 528 | CA  | PHE | A | 70 | 10.788 | -16.080 | -1.365 | 1.00 | 30.54 | C   |
| ATOM | 529 | C   | PHE | A | 70 | 11.691 | -17.099 | -0.646 | 1.00 | 29.74 | C   |
| ATOM | 530 | O   | PHE | A | 70 | 12.906 | -17.097 | -0.807 | 1.00 | 26.41 | O   |
| ATOM | 531 | CB  | PHE | A | 70 | 9.932  | -15.387 | -0.288 | 1.00 | 30.25 | C   |
| ATOM | 532 | CG  | PHE | A | 70 | 9.227  | -14.125 | -0.737 | 1.00 | 28.46 | C   |
| ATOM | 533 | CD1 | PHE | A | 70 | 8.468  | -14.109 | -1.899 | 1.00 | 26.39 | C   |
| ATOM | 534 | CD2 | PHE | A | 70 | 9.075  | -13.072 | 0.168  | 1.00 | 24.40 | C   |
| ATOM | 535 | CE1 | PHE | A | 70 | 7.554  | -13.084 | -2.130 | 1.00 | 27.08 | C   |
| ATOM | 536 | CE2 | PHE | A | 70 | 8.165  | -12.058 | -0.054 | 1.00 | 21.72 | C   |
| ATOM | 537 | CZ  | PHE | A | 70 | 7.399  | -12.062 | -1.196 | 1.00 | 25.72 | C   |
| ATOM | 538 | N   | GLY | A | 71 | 11.043 | -18.122 | -0.104 | 1.00 | 31.24 | N   |
| ATOM | 539 | CA  | GLY | A | 71 | 11.712 | -19.075 | 0.764  | 1.00 | 31.89 | C   |
| ATOM | 540 | C   | GLY | A | 71 | 12.873 | -19.697 | 0.044  | 1.00 | 31.60 | C   |
| ATOM | 541 | O   | GLY | A | 71 | 14.004 | -19.640 | 0.536  | 1.00 | 31.27 | O   |
| ATOM | 542 | N   | ASP | A | 72 | 12.614 | -19.987 | -1.227 | 1.00 | 33.37 | N   |
| ATOM | 543 | CA  | ASP | A | 72 | 13.555 | -20.627 | -2.154 | 1.00 | 33.34 | C   |
| ATOM | 544 | C   | ASP | A | 72 | 14.353 | -19.663 | -3.083 | 1.00 | 32.34 | C   |
| ATOM | 545 | O   | ASP | A | 72 | 15.121 | -20.113 | -3.946 | 1.00 | 30.19 | O   |
| ATOM | 546 | CB  | ASP | A | 72 | 12.767 | -21.662 | -2.979 | 1.00 | 33.35 | C   |
| ATOM | 547 | CG  | ASP | A | 72 | 12.165 | -22.762 | -2.099 | 1.00 | 31.88 | C   |
| ATOM | 548 | OD1 | ASP | A | 72 | 12.805 | -23.100 | -1.077 | 1.00 | 30.99 | O   |
| ATOM | 549 | OD2 | ASP | A | 72 | 11.059 | -23.269 | -2.406 | 1.00 | 29.43 | O1- |
| ATOM | 550 | N   | LYS | A | 73 | 14.183 | -18.352 | -2.870 | 1.00 | 31.11 | N   |
| ATOM | 551 | CA  | LYS | A | 73 | 14.958 | -17.288 | -3.538 | 1.00 | 27.64 | C   |
| ATOM | 552 | C   | LYS | A | 73 | 15.199 | -16.145 | -2.533 | 1.00 | 26.15 | C   |
| ATOM | 553 | O   | LYS | A | 73 | 14.585 | -15.081 | -2.619 | 1.00 | 23.20 | O   |
| ATOM | 554 | CB  | LYS | A | 73 | 14.187 | -16.738 | -4.757 | 1.00 | 28.01 | C   |
| ATOM | 555 | CG  | LYS | A | 73 | 14.083 | -17.691 | -5.962 | 1.00 | 25.72 | C   |
| ATOM | 556 | CD  | LYS | A | 73 | 14.918 | -17.203 | -7.143 | 1.00 | 24.18 | C   |
| ATOM | 557 | CE  | LYS | A | 73 | 14.754 | -15.712 | -7.383 | 1.00 | 23.68 | C   |
| ATOM | 558 | NZ  | LYS | A | 73 | 16.079 | -15.048 | -7.529 | 1.00 | 22.67 | N1+ |
| ATOM | 559 | N   | LEU | A | 74 | 16.031 | -16.423 | -1.533 | 1.00 | 27.33 | N   |
| ATOM | 560 | CA  | LEU | A | 74 | 16.166 | -15.602 | -0.312 | 1.00 | 26.12 | C   |
| ATOM | 561 | C   | LEU | A | 74 | 17.355 | -16.178 | 0.438  | 1.00 | 23.46 | C   |
| ATOM | 562 | O   | LEU | A | 74 | 18.398 | -15.545 | 0.518  | 1.00 | 21.59 | O   |
| ATOM | 563 | CB  | LEU | A | 74 | 14.922 | -15.728 | 0.593  | 1.00 | 26.77 | C   |
| ATOM | 564 | CG  | LEU | A | 74 | 14.153 | -14.538 | 1.199  | 1.00 | 25.70 | C   |
| ATOM | 565 | CD1 | LEU | A | 74 | 12.799 | -15.077 | 1.659  | 1.00 | 26.20 | C   |
| ATOM | 566 | CD2 | LEU | A | 74 | 14.879 | -13.871 | 2.381  | 1.00 | 22.43 | C   |
| ATOM | 567 | N   | CYS | A | 75 | 17.225 | -17.448 | 0.826  | 1.00 | 24.52 | N   |
| ATOM | 568 | CA  | CYS | A | 75 | 18.313 | -18.240 | 1.395  | 1.00 | 26.88 | C   |
| ATOM | 569 | C   | CYS | A | 75 | 19.554 | -18.212 | 0.475  | 1.00 | 28.33 | C   |
| ATOM | 570 | O   | CYS | A | 75 | 20.714 | -18.148 | 0.939  | 1.00 | 26.66 | O   |
| ATOM | 571 | CB  | CYS | A | 75 | 17.830 | -19.698 | 1.633  | 1.00 | 26.77 | C   |
| ATOM | 572 | SG  | CYS | A | 75 | 17.685 | -20.118 | 3.425  | 1.00 | 27.16 | S   |
| ATOM | 573 | N   | THR | A | 76 | 19.283 | -18.088 | -0.822 | 1.00 | 30.35 | N   |
| ATOM | 574 | CA  | THR | A | 76 | 20.287 | -18.225 | -1.866 | 1.00 | 30.59 | C   |
| ATOM | 575 | C   | THR | A | 76 | 21.471 | -17.261 | -1.658 | 1.00 | 30.26 | C   |
| ATOM | 576 | O   | THR | A | 76 | 22.293 | -17.437 | -0.739 | 1.00 | 29.82 | O   |
| ATOM | 577 | CB  | THR | A | 76 | 19.623 | -18.024 | -3.284 | 1.00 | 32.29 | C   |
| ATOM | 578 | CG2 | THR | A | 76 | 20.023 | -19.164 | -4.228 | 1.00 | 32.43 | C   |
| ATOM | 579 | OG1 | THR | A | 76 | 18.179 | -17.994 | -3.171 | 1.00 | 31.05 | O   |
| ATOM | 580 | N   | VAL | A | 77 | 21.493 | -16.179 | -2.427 | 1.00 | 31.21 | N   |
| ATOM | 581 | CA  | VAL | A | 77 | 22.661 | -15.299 | -2.455 | 1.00 | 30.79 | C   |
| ATOM | 582 | C   | VAL | A | 77 | 22.468 | -14.103 | -1.514 | 1.00 | 32.91 | C   |
| ATOM | 583 | O   | VAL | A | 77 | 23.392 | -13.312 | -1.272 | 1.00 | 33.22 | O   |
| ATOM | 584 | CB  | VAL | A | 77 | 22.944 | -14.813 | -3.893 | 1.00 | 28.48 | C   |
| ATOM | 585 | CG1 | VAL | A | 77 | 22.227 | -13.486 | -4.176 | 1.00 | 25.60 | C   |
| ATOM | 586 | CG2 | VAL | A | 77 | 24.439 | -14.718 | -4.118 | 1.00 | 24.59 | C   |
| ATOM | 587 | N   | ALA | A | 78 | 21.257 | -13.954 | -0.987 | 1.00 | 33.04 | N   |
| ATOM | 588 | CA  | ALA | A | 78 | 21.110 | -13.066 | 0.134  | 1.00 | 33.55 | C   |
| ATOM | 589 | C   | ALA | A | 78 | 22.005 | -13.706 | 1.199  | 1.00 | 35.33 | C   |
| ATOM | 590 | O   | ALA | A | 78 | 23.151 | -13.260 | 1.362  | 1.00 | 36.95 | O   |
| ATOM | 591 | CB  | ALA | A | 78 | 19.660 | -13.008 | 0.576  | 1.00 | 32.27 | C   |

|      |     |     |     |   |    |        |         |        |      |       |     |
|------|-----|-----|-----|---|----|--------|---------|--------|------|-------|-----|
| ATOM | 592 | N   | THR | A | 79 | 21.683 | -14.963 | 1.521  | 1.00 | 34.35 | N   |
| ATOM | 593 | CA  | THR | A | 79 | 22.100 | -15.570 | 2.779  | 1.00 | 33.26 | C   |
| ATOM | 594 | C   | THR | A | 79 | 23.555 | -16.077 | 2.835  | 1.00 | 32.95 | C   |
| ATOM | 595 | O   | THR | A | 79 | 24.250 | -15.840 | 3.828  | 1.00 | 29.56 | O   |
| ATOM | 596 | CB  | THR | A | 79 | 21.140 | -16.723 | 3.185  | 1.00 | 34.83 | C   |
| ATOM | 597 | CG2 | THR | A | 79 | 21.198 | -16.977 | 4.704  | 1.00 | 35.95 | C   |
| ATOM | 598 | OG1 | THR | A | 79 | 19.791 | -16.383 | 2.832  | 1.00 | 32.22 | O   |
| ATOM | 599 | N   | LEU | A | 80 | 24.027 | -16.777 | 1.798  | 1.00 | 32.03 | N   |
| ATOM | 600 | CA  | LEU | A | 80 | 25.417 | -17.297 | 1.808  | 1.00 | 28.26 | C   |
| ATOM | 601 | C   | LEU | A | 80 | 26.496 | -16.225 | 1.630  | 1.00 | 27.39 | C   |
| ATOM | 602 | O   | LEU | A | 80 | 27.663 | -16.471 | 1.914  | 1.00 | 27.30 | O   |
| ATOM | 603 | CB  | LEU | A | 80 | 25.609 | -18.388 | 0.750  | 1.00 | 27.14 | C   |
| ATOM | 604 | CG  | LEU | A | 80 | 26.202 | -18.027 | -0.613 | 1.00 | 23.17 | C   |
| ATOM | 605 | CD1 | LEU | A | 80 | 27.191 | -19.114 | -1.025 | 1.00 | 23.29 | C   |
| ATOM | 606 | CD2 | LEU | A | 80 | 25.084 | -17.888 | -1.649 | 1.00 | 22.37 | C   |
| ATOM | 607 | N   | ARG | A | 81 | 26.117 | -15.063 | 1.102  | 1.00 | 28.16 | N   |
| ATOM | 608 | CA  | ARG | A | 81 | 26.911 | -13.843 | 1.282  | 1.00 | 28.08 | C   |
| ATOM | 609 | C   | ARG | A | 81 | 26.719 | -13.293 | 2.706  | 1.00 | 29.33 | C   |
| ATOM | 610 | O   | ARG | A | 81 | 27.463 | -12.415 | 3.169  | 1.00 | 28.86 | O   |
| ATOM | 611 | CB  | ARG | A | 81 | 26.477 | -12.780 | 0.281  | 1.00 | 25.69 | C   |
| ATOM | 612 | CG  | ARG | A | 81 | 27.446 | -11.627 | 0.186  | 1.00 | 24.75 | C   |
| ATOM | 613 | CD  | ARG | A | 81 | 27.337 | -10.950 | -1.152 | 1.00 | 25.26 | C   |
| ATOM | 614 | NE  | ARG | A | 81 | 27.236 | -11.935 | -2.211 | 1.00 | 28.70 | N   |
| ATOM | 615 | CZ  | ARG | A | 81 | 28.043 | -12.988 | -2.337 | 1.00 | 32.72 | C   |
| ATOM | 616 | NH1 | ARG | A | 81 | 29.145 | -13.080 | -1.599 | 1.00 | 31.48 | N1+ |
| ATOM | 617 | NH2 | ARG | A | 81 | 27.766 | -13.933 | -3.239 | 1.00 | 35.72 | N   |
| ATOM | 618 | N   | GLU | A | 82 | 25.660 | -13.760 | 3.361  | 1.00 | 29.80 | N   |
| ATOM | 619 | CA  | GLU | A | 82 | 25.385 | -13.405 | 4.745  | 1.00 | 30.13 | C   |
| ATOM | 620 | C   | GLU | A | 82 | 25.702 | -14.591 | 5.709  | 1.00 | 28.95 | C   |
| ATOM | 621 | O   | GLU | A | 82 | 24.836 | -15.378 | 6.068  | 1.00 | 25.40 | O   |
| ATOM | 622 | CB  | GLU | A | 82 | 23.930 | -12.881 | 4.802  | 1.00 | 29.79 | C   |
| ATOM | 623 | CG  | GLU | A | 82 | 22.913 | -13.604 | 5.673  | 1.00 | 28.95 | C   |
| ATOM | 624 | CD  | GLU | A | 82 | 22.631 | -12.867 | 6.965  | 1.00 | 28.32 | C   |
| ATOM | 625 | OE1 | GLU | A | 82 | 23.152 | -11.733 | 7.119  | 1.00 | 27.70 | O   |
| ATOM | 626 | OE2 | GLU | A | 82 | 21.883 | -13.416 | 7.814  | 1.00 | 23.91 | O1- |
| ATOM | 627 | N   | THR | A | 83 | 26.989 | -14.795 | 5.996  | 1.00 | 29.92 | N   |
| ATOM | 628 | CA  | THR | A | 83 | 27.418 | -16.000 | 6.718  | 1.00 | 32.38 | C   |
| ATOM | 629 | C   | THR | A | 83 | 28.141 | -15.685 | 8.052  | 1.00 | 35.54 | C   |
| ATOM | 630 | O   | THR | A | 83 | 29.381 | -15.602 | 8.095  | 1.00 | 37.17 | O   |
| ATOM | 631 | CB  | THR | A | 83 | 28.363 | -16.937 | 5.826  | 1.00 | 29.73 | C   |
| ATOM | 632 | CG2 | THR | A | 83 | 27.562 | -17.986 | 5.086  | 1.00 | 28.72 | C   |
| ATOM | 633 | OG1 | THR | A | 83 | 29.107 | -16.168 | 4.865  | 1.00 | 28.72 | O   |
| ATOM | 634 | N   | TYR | A | 84 | 27.418 | -15.611 | 9.171  | 1.00 | 36.72 | N   |
| ATOM | 635 | CA  | TYR | A | 84 | 28.134 | -15.232 | 10.392 | 1.00 | 36.41 | C   |
| ATOM | 636 | C   | TYR | A | 84 | 27.787 | -15.855 | 11.752 | 1.00 | 37.17 | C   |
| ATOM | 637 | O   | TYR | A | 84 | 28.696 | -16.145 | 12.553 | 1.00 | 37.81 | O   |
| ATOM | 638 | CB  | TYR | A | 84 | 28.155 | -13.719 | 10.504 | 1.00 | 32.67 | C   |
| ATOM | 639 | CG  | TYR | A | 84 | 29.547 | -13.173 | 10.612 | 1.00 | 27.81 | C   |
| ATOM | 640 | CD1 | TYR | A | 84 | 30.321 | -13.442 | 11.728 | 1.00 | 26.38 | C   |
| ATOM | 641 | CD2 | TYR | A | 84 | 30.000 | -12.224 | 9.714  | 1.00 | 27.01 | C   |
| ATOM | 642 | CE1 | TYR | A | 84 | 31.467 | -12.758 | 11.964 | 1.00 | 24.78 | C   |
| ATOM | 643 | CE2 | TYR | A | 84 | 31.147 | -11.539 | 9.938  | 1.00 | 24.86 | C   |
| ATOM | 644 | CZ  | TYR | A | 84 | 31.865 | -11.794 | 11.072 | 1.00 | 25.15 | C   |
| ATOM | 645 | OH  | TYR | A | 84 | 32.909 | -10.976 | 11.395 | 1.00 | 27.73 | O   |
| ATOM | 646 | N   | GLY | A | 85 | 26.498 | -15.954 | 12.073 | 1.00 | 37.02 | N   |
| ATOM | 647 | CA  | GLY | A | 85 | 26.123 | -16.752 | 13.222 | 1.00 | 36.20 | C   |
| ATOM | 648 | C   | GLY | A | 85 | 25.033 | -16.151 | 14.070 | 1.00 | 35.50 | C   |
| ATOM | 649 | O   | GLY | A | 85 | 25.291 | -15.646 | 15.165 | 1.00 | 36.73 | O   |
| ATOM | 650 | N   | GLU | A | 86 | 23.816 | -16.174 | 13.539 | 1.00 | 34.43 | N   |
| ATOM | 651 | CA  | GLU | A | 86 | 22.602 | -16.106 | 14.366 | 1.00 | 31.00 | C   |
| ATOM | 652 | C   | GLU | A | 86 | 21.465 | -16.802 | 13.613 | 1.00 | 28.33 | C   |
| ATOM | 653 | O   | GLU | A | 86 | 20.837 | -17.735 | 14.124 | 1.00 | 28.62 | O   |
| ATOM | 654 | CB  | GLU | A | 86 | 22.220 | -14.655 | 14.676 | 1.00 | 29.50 | C   |
| ATOM | 655 | CG  | GLU | A | 86 | 21.084 | -14.522 | 15.646 | 1.00 | 25.84 | C   |
| ATOM | 656 | CD  | GLU | A | 86 | 21.097 | -15.620 | 16.687 | 1.00 | 26.43 | C   |
| ATOM | 657 | OE1 | GLU | A | 86 | 21.992 | -15.623 | 17.568 | 1.00 | 22.42 | O   |
| ATOM | 658 | OE2 | GLU | A | 86 | 20.223 | -16.512 | 16.584 | 1.00 | 27.71 | O1- |
| ATOM | 659 | N   | MET | A | 87 | 21.326 | -16.474 | 12.340 | 1.00 | 24.32 | N   |
| ATOM | 660 | CA  | MET | A | 87 | 20.476 | -17.275 | 11.494 | 1.00 | 24.03 | C   |
| ATOM | 661 | C   | MET | A | 87 | 21.175 | -18.576 | 11.102 | 1.00 | 23.82 | C   |
| ATOM | 662 | O   | MET | A | 87 | 21.884 | -18.629 | 10.092 | 1.00 | 22.28 | O   |

|      |     |     |     |   |    |        |         |        |      |       |     |
|------|-----|-----|-----|---|----|--------|---------|--------|------|-------|-----|
| ATOM | 663 | CB  | MET | A | 87 | 20.062 | -16.483 | 10.266 | 1.00 | 22.69 | C   |
| ATOM | 664 | CG  | MET | A | 87 | 19.281 | -15.254 | 10.625 | 1.00 | 21.49 | C   |
| ATOM | 665 | SD  | MET | A | 87 | 17.968 | -15.060 | 9.479  | 1.00 | 25.30 | S   |
| ATOM | 666 | CE  | MET | A | 87 | 17.164 | -13.558 | 10.089 | 1.00 | 25.45 | C   |
| ATOM | 667 | N   | ALA | A | 88 | 21.100 | -19.558 | 12.007 | 1.00 | 24.16 | N   |
| ATOM | 668 | CA  | ALA | A | 88 | 21.551 | -20.939 | 11.769 | 1.00 | 23.40 | C   |
| ATOM | 669 | C   | ALA | A | 88 | 20.674 | -21.671 | 10.750 | 1.00 | 22.19 | C   |
| ATOM | 670 | O   | ALA | A | 88 | 20.034 | -22.659 | 11.074 | 1.00 | 19.67 | O   |
| ATOM | 671 | CB  | ALA | A | 88 | 21.562 | -21.707 | 13.092 | 1.00 | 23.53 | C   |
| ATOM | 672 | N   | ASP | A | 89 | 20.914 | -21.344 | 9.489  | 1.00 | 24.31 | N   |
| ATOM | 673 | CA  | ASP | A | 89 | 19.989 | -21.540 | 8.373  | 1.00 | 26.76 | C   |
| ATOM | 674 | C   | ASP | A | 89 | 18.712 | -22.355 | 8.559  | 1.00 | 27.24 | C   |
| ATOM | 675 | O   | ASP | A | 89 | 18.747 | -23.479 | 9.048  | 1.00 | 28.36 | O   |
| ATOM | 676 | CB  | ASP | A | 89 | 20.745 | -22.081 | 7.155  | 1.00 | 29.44 | C   |
| ATOM | 677 | CG  | ASP | A | 89 | 20.619 | -21.162 | 5.954  | 1.00 | 33.40 | C   |
| ATOM | 678 | OD1 | ASP | A | 89 | 21.358 | -20.136 | 5.934  | 1.00 | 34.86 | O   |
| ATOM | 679 | OD2 | ASP | A | 89 | 19.716 | -21.401 | 5.103  | 1.00 | 29.72 | O1- |
| ATOM | 680 | N   | CYS | A | 90 | 17.732 | -21.971 | 7.752  | 1.00 | 27.38 | N   |
| ATOM | 681 | CA  | CYS | A | 90 | 16.343 | -22.307 | 8.008  | 1.00 | 26.95 | C   |
| ATOM | 682 | C   | CYS | A | 90 | 15.605 | -22.522 | 6.664  | 1.00 | 26.81 | C   |
| ATOM | 683 | O   | CYS | A | 90 | 14.461 | -22.077 | 6.485  | 1.00 | 28.42 | O   |
| ATOM | 684 | CB  | CYS | A | 90 | 15.719 | -21.154 | 8.799  | 1.00 | 27.53 | C   |
| ATOM | 685 | SG  | CYS | A | 90 | 14.094 | -21.429 | 9.556  | 1.00 | 25.39 | S   |
| ATOM | 686 | N   | CYS | A | 91 | 16.248 | -23.192 | 5.708  | 1.00 | 24.62 | N   |
| ATOM | 687 | CA  | CYS | A | 91 | 15.559 | -23.491 | 4.457  | 1.00 | 22.81 | C   |
| ATOM | 688 | C   | CYS | A | 91 | 15.315 | -24.990 | 4.337  | 1.00 | 21.96 | C   |
| ATOM | 689 | O   | CYS | A | 91 | 14.563 | -25.413 | 3.449  | 1.00 | 19.33 | O   |
| ATOM | 690 | CB  | CYS | A | 91 | 16.330 | -22.934 | 3.255  | 1.00 | 24.46 | C   |
| ATOM | 691 | SG  | CYS | A | 91 | 17.922 | -22.131 | 3.674  | 1.00 | 26.72 | S   |
| ATOM | 692 | N   | ALA | A | 92 | 15.547 | -25.641 | 5.480  | 1.00 | 20.50 | N   |
| ATOM | 693 | CA  | ALA | A | 92 | 15.453 | -27.100 | 5.702  | 1.00 | 21.22 | C   |
| ATOM | 694 | C   | ALA | A | 92 | 14.711 | -27.984 | 4.682  | 1.00 | 24.74 | C   |
| ATOM | 695 | O   | ALA | A | 92 | 15.053 | -27.983 | 3.494  | 1.00 | 24.03 | O   |
| ATOM | 696 | CB  | ALA | A | 92 | 14.900 | -27.358 | 7.109  | 1.00 | 19.84 | C   |
| ATOM | 697 | N   | LYS | A | 93 | 13.819 | -28.862 | 5.165  | 1.00 | 29.36 | N   |
| ATOM | 698 | CA  | LYS | A | 93 | 13.030 | -29.749 | 4.272  | 1.00 | 32.05 | C   |
| ATOM | 699 | C   | LYS | A | 93 | 11.829 | -28.986 | 3.713  | 1.00 | 32.90 | C   |
| ATOM | 700 | O   | LYS | A | 93 | 10.689 | -29.355 | 4.021  | 1.00 | 32.86 | O   |
| ATOM | 701 | CB  | LYS | A | 93 | 12.505 | -30.991 | 5.016  | 1.00 | 31.93 | C   |
| ATOM | 702 | CG  | LYS | A | 93 | 13.547 | -31.775 | 5.787  | 1.00 | 33.86 | C   |
| ATOM | 703 | CD  | LYS | A | 93 | 13.897 | -33.068 | 5.060  | 1.00 | 41.47 | C   |
| ATOM | 704 | CE  | LYS | A | 93 | 13.058 | -34.327 | 5.515  | 1.00 | 43.89 | C   |
| ATOM | 705 | NZ  | LYS | A | 93 | 13.324 | -35.551 | 4.649  | 1.00 | 41.62 | N1+ |
| ATOM | 706 | N   | GLN | A | 94 | 12.106 | -27.847 | 3.058  | 1.00 | 34.28 | N   |
| ATOM | 707 | CA  | GLN | A | 94 | 11.143 | -27.119 | 2.211  | 1.00 | 33.24 | C   |
| ATOM | 708 | C   | GLN | A | 94 | 9.733  | -27.305 | 2.726  | 1.00 | 34.19 | C   |
| ATOM | 709 | O   | GLN | A | 94 | 9.042  | -28.292 | 2.385  | 1.00 | 33.84 | O   |
| ATOM | 710 | CB  | GLN | A | 94 | 11.233 | -27.588 | 0.762  | 1.00 | 31.80 | C   |
| ATOM | 711 | CG  | GLN | A | 94 | 10.790 | -26.549 | -0.236 | 1.00 | 34.94 | C   |
| ATOM | 712 | CD  | GLN | A | 94 | 11.426 | -26.732 | -1.637 | 1.00 | 38.30 | C   |
| ATOM | 713 | NE2 | GLN | A | 94 | 12.641 | -26.177 | -1.815 | 1.00 | 40.46 | N   |
| ATOM | 714 | OE1 | GLN | A | 94 | 10.825 | -27.321 | -2.563 | 1.00 | 32.88 | O   |
| ATOM | 715 | N   | GLU | A | 95 | 9.332  | -26.345 | 3.554  | 1.00 | 32.90 | N   |
| ATOM | 716 | CA  | GLU | A | 95 | 8.335  | -26.553 | 4.596  | 1.00 | 29.83 | C   |
| ATOM | 717 | C   | GLU | A | 95 | 7.742  | -25.193 | 4.953  | 1.00 | 27.35 | C   |
| ATOM | 718 | O   | GLU | A | 95 | 8.463  | -24.205 | 5.067  | 1.00 | 27.18 | O   |
| ATOM | 719 | CB  | GLU | A | 95 | 8.999  | -27.179 | 5.835  | 1.00 | 29.20 | C   |
| ATOM | 720 | CG  | GLU | A | 95 | 10.428 | -26.672 | 6.091  | 1.00 | 31.06 | C   |
| ATOM | 721 | CD  | GLU | A | 95 | 11.023 | -27.126 | 7.434  | 1.00 | 31.73 | C   |
| ATOM | 722 | OE1 | GLU | A | 95 | 10.421 | -28.009 | 8.097  | 1.00 | 33.07 | O   |
| ATOM | 723 | OE2 | GLU | A | 95 | 12.075 | -26.563 | 7.821  | 1.00 | 28.41 | O1- |
| ATOM | 724 | N   | PRO | A | 96 | 6.413  | -25.117 | 5.082  | 1.00 | 26.21 | N   |
| ATOM | 725 | CA  | PRO | A | 96 | 5.812  | -24.684 | 6.341  | 1.00 | 24.52 | C   |
| ATOM | 726 | C   | PRO | A | 96 | 6.808  | -24.184 | 7.407  | 1.00 | 25.14 | C   |
| ATOM | 727 | O   | PRO | A | 96 | 7.050  | -22.970 | 7.514  | 1.00 | 25.18 | O   |
| ATOM | 728 | CB  | PRO | A | 96 | 5.052  | -25.927 | 6.769  | 1.00 | 25.77 | C   |
| ATOM | 729 | CG  | PRO | A | 96 | 4.695  | -26.630 | 5.390  | 1.00 | 25.29 | C   |
| ATOM | 730 | CD  | PRO | A | 96 | 5.461  | -25.931 | 4.308  | 1.00 | 22.87 | C   |
| ATOM | 731 | N   | GLU | A | 97 | 7.471  | -25.114 | 8.099  | 1.00 | 25.87 | N   |
| ATOM | 732 | CA  | GLU | A | 97 | 8.490  | -24.774 | 9.105  | 1.00 | 24.65 | C   |
| ATOM | 733 | C   | GLU | A | 97 | 9.746  | -24.064 | 8.538  | 1.00 | 24.75 | C   |

|      |     |     |     |   |     |        |         |        |      |       |     |
|------|-----|-----|-----|---|-----|--------|---------|--------|------|-------|-----|
| ATOM | 734 | O   | GLU | A | 97  | 10.841 | -24.176 | 9.090  | 1.00 | 25.54 | O   |
| ATOM | 735 | CB  | GLU | A | 97  | 8.900  | -26.035 | 9.903  | 1.00 | 22.10 | C   |
| ATOM | 736 | CG  | GLU | A | 97  | 9.205  | -25.768 | 11.382 | 1.00 | 20.67 | C   |
| ATOM | 737 | CD  | GLU | A | 97  | 9.771  | -26.971 | 12.146 | 1.00 | 21.89 | C   |
| ATOM | 738 | OE1 | GLU | A | 97  | 9.336  | -28.118 | 11.890 | 1.00 | 20.02 | O   |
| ATOM | 739 | OE2 | GLU | A | 97  | 10.584 | -26.752 | 13.080 | 1.00 | 21.31 | O1- |
| ATOM | 740 | N   | ARG | A | 98  | 9.603  | -23.344 | 7.433  | 1.00 | 25.09 | N   |
| ATOM | 741 | CA  | ARG | A | 98  | 10.673 | -22.458 | 7.010  | 1.00 | 25.81 | C   |
| ATOM | 742 | C   | ARG | A | 98  | 10.317 | -21.131 | 7.623  | 1.00 | 25.39 | C   |
| ATOM | 743 | O   | ARG | A | 98  | 10.978 | -20.710 | 8.581  | 1.00 | 24.60 | O   |
| ATOM | 744 | CB  | ARG | A | 98  | 10.787 | -22.358 | 5.466  | 1.00 | 28.52 | C   |
| ATOM | 745 | CG  | ARG | A | 98  | 10.015 | -21.212 | 4.761  | 1.00 | 29.53 | C   |
| ATOM | 746 | CD  | ARG | A | 98  | 9.578  | -21.625 | 3.364  | 1.00 | 32.14 | C   |
| ATOM | 747 | NE  | ARG | A | 98  | 8.122  | -21.618 | 3.201  | 1.00 | 35.46 | N   |
| ATOM | 748 | CZ  | ARG | A | 98  | 7.473  | -22.269 | 2.232  | 1.00 | 36.58 | C   |
| ATOM | 749 | NH1 | ARG | A | 98  | 8.153  | -23.041 | 1.390  | 1.00 | 34.88 | N1+ |
| ATOM | 750 | NH2 | ARG | A | 98  | 6.140  | -22.181 | 2.122  | 1.00 | 35.51 | N   |
| ATOM | 751 | N   | ASN | A | 99  | 9.118  | -20.641 | 7.289  | 1.00 | 24.15 | N   |
| ATOM | 752 | CA  | ASN | A | 99  | 8.828  | -19.225 | 7.492  | 1.00 | 23.31 | C   |
| ATOM | 753 | C   | ASN | A | 99  | 9.235  | -18.901 | 8.910  | 1.00 | 22.87 | C   |
| ATOM | 754 | O   | ASN | A | 99  | 10.205 | -18.165 | 9.103  | 1.00 | 20.69 | O   |
| ATOM | 755 | CB  | ASN | A | 99  | 7.347  | -18.902 | 7.287  | 1.00 | 22.49 | C   |
| ATOM | 756 | CG  | ASN | A | 99  | 7.134  | -17.493 | 6.738  | 1.00 | 24.38 | C   |
| ATOM | 757 | ND2 | ASN | A | 99  | 7.943  | -16.540 | 7.206  | 1.00 | 21.20 | N   |
| ATOM | 758 | OD1 | ASN | A | 99  | 6.321  | -17.287 | 5.821  | 1.00 | 28.44 | O   |
| ATOM | 759 | N   | GLU | A | 100 | 8.818  | -19.821 | 9.785  | 1.00 | 21.65 | N   |
| ATOM | 760 | CA  | GLU | A | 100 | 8.975  | -19.687 | 11.215 | 1.00 | 20.63 | C   |
| ATOM | 761 | C   | GLU | A | 100 | 10.448 | -19.660 | 11.578 | 1.00 | 22.84 | C   |
| ATOM | 762 | O   | GLU | A | 100 | 11.049 | -18.584 | 11.656 | 1.00 | 23.88 | O   |
| ATOM | 763 | CB  | GLU | A | 100 | 8.255  | -20.822 | 11.950 | 1.00 | 16.75 | C   |
| ATOM | 764 | CG  | GLU | A | 100 | 6.754  | -20.854 | 11.705 | 1.00 | 18.79 | C   |
| ATOM | 765 | CD  | GLU | A | 100 | 6.355  | -21.788 | 10.556 | 1.00 | 24.05 | C   |
| ATOM | 766 | OE1 | GLU | A | 100 | 6.735  | -22.979 | 10.603 | 1.00 | 23.63 | O   |
| ATOM | 767 | OE2 | GLU | A | 100 | 5.629  | -21.357 | 9.622  | 1.00 | 26.06 | O1- |
| ATOM | 768 | N   | CYS | A | 101 | 11.073 | -20.826 | 11.570 | 1.00 | 26.26 | N   |
| ATOM | 769 | CA  | CYS | A | 101 | 12.183 | -21.078 | 12.477 | 1.00 | 29.17 | C   |
| ATOM | 770 | C   | CYS | A | 101 | 13.170 | -19.962 | 12.458 | 1.00 | 28.71 | C   |
| ATOM | 771 | O   | CYS | A | 101 | 13.708 | -19.631 | 13.507 | 1.00 | 29.61 | O   |
| ATOM | 772 | CB  | CYS | A | 101 | 12.927 | -22.363 | 12.140 | 1.00 | 31.73 | C   |
| ATOM | 773 | SG  | CYS | A | 101 | 14.563 | -21.967 | 11.457 | 1.00 | 33.00 | S   |
| ATOM | 774 | N   | PHE | A | 102 | 13.459 | -19.419 | 11.274 | 1.00 | 29.99 | N   |
| ATOM | 775 | CA  | PHE | A | 102 | 14.339 | -18.251 | 11.208 | 1.00 | 30.99 | C   |
| ATOM | 776 | C   | PHE | A | 102 | 13.937 | -17.084 | 10.309 | 1.00 | 30.01 | C   |
| ATOM | 777 | O   | PHE | A | 102 | 14.198 | -15.929 | 10.646 | 1.00 | 31.09 | O   |
| ATOM | 778 | CB  | PHE | A | 102 | 15.794 | -18.669 | 10.927 | 1.00 | 29.15 | C   |
| ATOM | 779 | CG  | PHE | A | 102 | 16.643 | -18.701 | 12.165 | 1.00 | 31.69 | C   |
| ATOM | 780 | CD1 | PHE | A | 102 | 16.206 | -18.063 | 13.325 | 1.00 | 31.15 | C   |
| ATOM | 781 | CD2 | PHE | A | 102 | 17.771 | -19.508 | 12.236 | 1.00 | 33.88 | C   |
| ATOM | 782 | CE1 | PHE | A | 102 | 16.858 | -18.244 | 14.537 | 1.00 | 33.52 | C   |
| ATOM | 783 | CE2 | PHE | A | 102 | 18.441 | -19.698 | 13.451 | 1.00 | 34.28 | C   |
| ATOM | 784 | CZ  | PHE | A | 102 | 17.979 | -19.066 | 14.605 | 1.00 | 35.49 | C   |
| ATOM | 785 | N   | LEU | A | 103 | 13.308 | -17.360 | 9.174  | 1.00 | 29.36 | N   |
| ATOM | 786 | CA  | LEU | A | 103 | 13.003 | -16.279 | 8.237  | 1.00 | 26.14 | C   |
| ATOM | 787 | C   | LEU | A | 103 | 11.972 | -15.389 | 8.900  | 1.00 | 25.93 | C   |
| ATOM | 788 | O   | LEU | A | 103 | 12.147 | -14.171 | 8.921  | 1.00 | 25.78 | O   |
| ATOM | 789 | CB  | LEU | A | 103 | 12.461 | -16.815 | 6.906  | 1.00 | 19.74 | C   |
| ATOM | 790 | CG  | LEU | A | 103 | 13.228 | -17.942 | 6.214  | 1.00 | 12.38 | C   |
| ATOM | 791 | CD1 | LEU | A | 103 | 12.638 | -18.120 | 4.854  | 1.00 | 9.21  | C   |
| ATOM | 792 | CD2 | LEU | A | 103 | 14.710 | -17.659 | 6.156  | 1.00 | 6.56  | C   |
| ATOM | 793 | N   | GLN | A | 104 | 11.085 | -16.014 | 9.683  | 1.00 | 25.30 | N   |
| ATOM | 794 | CA  | GLN | A | 104 | 10.052 | -15.283 | 10.414 | 1.00 | 25.11 | C   |
| ATOM | 795 | C   | GLN | A | 104 | 10.454 | -14.979 | 11.849 | 1.00 | 25.04 | C   |
| ATOM | 796 | O   | GLN | A | 104 | 9.587  | -14.855 | 12.719 | 1.00 | 24.08 | O   |
| ATOM | 797 | CB  | GLN | A | 104 | 8.742  | -16.057 | 10.419 | 1.00 | 24.18 | C   |
| ATOM | 798 | CG  | GLN | A | 104 | 7.502  | -15.185 | 10.263 | 1.00 | 26.71 | C   |
| ATOM | 799 | CD  | GLN | A | 104 | 6.727  | -14.995 | 11.555 | 1.00 | 27.66 | C   |
| ATOM | 800 | NE2 | GLN | A | 104 | 5.873  | -13.976 | 11.579 | 1.00 | 27.08 | N   |
| ATOM | 801 | OE1 | GLN | A | 104 | 6.884  | -15.758 | 12.520 | 1.00 | 26.58 | O   |
| ATOM | 802 | N   | HIS | A | 105 | 11.771 | -14.903 | 12.102 | 1.00 | 27.00 | N   |
| ATOM | 803 | CA  | HIS | A | 105 | 12.310 | -14.502 | 13.416 | 1.00 | 24.47 | C   |
| ATOM | 804 | C   | HIS | A | 105 | 13.366 | -13.402 | 13.432 | 1.00 | 21.96 | C   |

|      |     |     |     |   |     |        |         |        |      |       |     |
|------|-----|-----|-----|---|-----|--------|---------|--------|------|-------|-----|
| ATOM | 805 | O   | HIS | A | 105 | 14.561 | -13.626 | 13.636 | 1.00 | 18.43 | O   |
| ATOM | 806 | CB  | HIS | A | 105 | 12.745 | -15.726 | 14.239 | 1.00 | 22.38 | C   |
| ATOM | 807 | CG  | HIS | A | 105 | 11.579 | -16.471 | 14.785 | 1.00 | 21.89 | C   |
| ATOM | 808 | CD2 | HIS | A | 105 | 10.375 | -16.007 | 15.196 | 1.00 | 21.60 | C   |
| ATOM | 809 | ND1 | HIS | A | 105 | 11.379 | -17.806 | 14.479 | 1.00 | 20.64 | N   |
| ATOM | 810 | CE1 | HIS | A | 105 | 10.095 | -18.100 | 14.625 | 1.00 | 22.23 | C   |
| ATOM | 811 | NE2 | HIS | A | 105 | 9.467  | -17.022 | 15.048 | 1.00 | 23.35 | N   |
| ATOM | 812 | N   | LYS | A | 106 | 12.917 | -12.304 | 12.860 | 1.00 | 19.95 | N   |
| ATOM | 813 | CA  | LYS | A | 106 | 12.919 | -11.020 | 13.530 | 1.00 | 19.97 | C   |
| ATOM | 814 | C   | LYS | A | 106 | 13.352 | -11.055 | 14.998 | 1.00 | 20.41 | C   |
| ATOM | 815 | O   | LYS | A | 106 | 12.569 | -11.484 | 15.844 | 1.00 | 19.74 | O   |
| ATOM | 816 | CB  | LYS | A | 106 | 11.509 | -10.434 | 13.441 | 1.00 | 18.97 | C   |
| ATOM | 817 | CG  | LYS | A | 106 | 10.855 | -10.624 | 12.077 | 1.00 | 14.34 | C   |
| ATOM | 818 | CD  | LYS | A | 106 | 9.593  | -9.822  | 11.956 | 1.00 | 12.34 | C   |
| ATOM | 819 | CE  | LYS | A | 106 | 8.917  | -10.071 | 10.618 | 1.00 | 15.93 | C   |
| ATOM | 820 | NZ  | LYS | A | 106 | 7.629  | -9.296  | 10.461 | 1.00 | 19.28 | N1+ |
| ATOM | 821 | N   | ASP | A | 107 | 14.647 | -10.804 | 15.235 | 1.00 | 20.45 | N   |
| ATOM | 822 | CA  | ASP | A | 107 | 15.129 | -10.023 | 16.386 | 1.00 | 19.31 | C   |
| ATOM | 823 | C   | ASP | A | 107 | 14.254 | -8.775  | 16.470 | 1.00 | 20.32 | C   |
| ATOM | 824 | O   | ASP | A | 107 | 13.725 | -8.318  | 15.464 | 1.00 | 18.89 | O   |
| ATOM | 825 | CB  | ASP | A | 107 | 16.582 | -9.589  | 16.168 | 1.00 | 18.38 | C   |
| ATOM | 826 | CG  | ASP | A | 107 | 17.324 | -9.293  | 17.468 | 1.00 | 20.19 | C   |
| ATOM | 827 | OD1 | ASP | A | 107 | 16.972 | -8.328  | 18.186 | 1.00 | 20.89 | O   |
| ATOM | 828 | OD2 | ASP | A | 107 | 18.343 | -9.964  | 17.709 | 1.00 | 20.24 | O1- |
| ATOM | 829 | N   | ASP | A | 108 | 14.062 | -8.248  | 17.673 | 1.00 | 22.88 | N   |
| ATOM | 830 | CA  | ASP | A | 108 | 12.971 | -7.310  | 17.867 | 1.00 | 24.38 | C   |
| ATOM | 831 | C   | ASP | A | 108 | 13.419 | -5.855  | 17.972 | 1.00 | 28.19 | C   |
| ATOM | 832 | O   | ASP | A | 108 | 13.842 | -5.278  | 16.979 | 1.00 | 34.68 | O   |
| ATOM | 833 | CB  | ASP | A | 108 | 12.119 | -7.724  | 19.066 | 1.00 | 21.46 | C   |
| ATOM | 834 | CG  | ASP | A | 108 | 10.665 | -7.323  | 18.893 | 1.00 | 21.67 | C   |
| ATOM | 835 | OD1 | ASP | A | 108 | 10.407 | -6.411  | 18.098 | 1.00 | 20.61 | O   |
| ATOM | 836 | OD2 | ASP | A | 108 | 9.792  | -7.901  | 19.583 | 1.00 | 24.35 | O1- |
| ATOM | 837 | N   | ASN | A | 109 | 13.182 | -5.218  | 19.110 | 1.00 | 28.47 | N   |
| ATOM | 838 | CA  | ASN | A | 109 | 13.326 | -3.763  | 19.264 | 1.00 | 28.03 | C   |
| ATOM | 839 | C   | ASN | A | 109 | 14.728 | -3.298  | 18.833 | 1.00 | 28.47 | C   |
| ATOM | 840 | O   | ASN | A | 109 | 15.003 | -3.159  | 17.631 | 1.00 | 29.63 | O   |
| ATOM | 841 | CB  | ASN | A | 109 | 13.100 | -3.463  | 20.742 | 1.00 | 30.55 | C   |
| ATOM | 842 | CG  | ASN | A | 109 | 12.170 | -2.307  | 20.987 | 1.00 | 30.28 | C   |
| ATOM | 843 | ND2 | ASN | A | 109 | 11.029 | -2.303  | 20.315 | 1.00 | 34.20 | N   |
| ATOM | 844 | OD1 | ASN | A | 109 | 12.411 | -1.514  | 21.893 | 1.00 | 28.96 | O   |
| ATOM | 845 | N   | PRO | A | 110 | 15.632 | -3.006  | 19.797 | 1.00 | 27.35 | N   |
| ATOM | 846 | CA  | PRO | A | 110 | 16.964 | -3.597  | 19.834 | 1.00 | 27.24 | C   |
| ATOM | 847 | C   | PRO | A | 110 | 17.241 | -4.929  | 19.113 | 1.00 | 29.36 | C   |
| ATOM | 848 | O   | PRO | A | 110 | 17.484 | -6.001  | 19.740 | 1.00 | 29.54 | O   |
| ATOM | 849 | CB  | PRO | A | 110 | 17.284 | -3.559  | 21.317 | 1.00 | 25.13 | C   |
| ATOM | 850 | CG  | PRO | A | 110 | 16.640 | -2.142  | 21.702 | 1.00 | 25.75 | C   |
| ATOM | 851 | CD  | PRO | A | 110 | 15.683 | -1.751  | 20.558 | 1.00 | 24.19 | C   |
| ATOM | 852 | N   | ASN | A | 111 | 17.144 | -4.835  | 17.781 | 1.00 | 27.97 | N   |
| ATOM | 853 | CA  | ASN | A | 111 | 18.078 | -5.469  | 16.846 | 1.00 | 24.32 | C   |
| ATOM | 854 | C   | ASN | A | 111 | 19.394 | -4.725  | 16.826 | 1.00 | 22.19 | C   |
| ATOM | 855 | O   | ASN | A | 111 | 19.509 | -3.710  | 17.495 | 1.00 | 19.34 | O   |
| ATOM | 856 | CB  | ASN | A | 111 | 17.515 | -5.455  | 15.440 | 1.00 | 21.73 | C   |
| ATOM | 857 | CG  | ASN | A | 111 | 16.979 | -4.106  | 15.050 | 1.00 | 19.05 | C   |
| ATOM | 858 | ND2 | ASN | A | 111 | 17.263 | -3.075  | 15.851 | 1.00 | 14.84 | N   |
| ATOM | 859 | OD1 | ASN | A | 111 | 16.299 | -3.992  | 14.035 | 1.00 | 22.36 | O   |
| ATOM | 860 | N   | LEU | A | 112 | 20.147 | -4.978  | 15.759 | 1.00 | 24.65 | N   |
| ATOM | 861 | CA  | LEU | A | 112 | 21.611 | -4.907  | 15.800 | 1.00 | 26.73 | C   |
| ATOM | 862 | C   | LEU | A | 112 | 22.172 | -3.568  | 15.277 | 1.00 | 26.67 | C   |
| ATOM | 863 | O   | LEU | A | 112 | 21.839 | -2.531  | 15.854 | 1.00 | 23.61 | O   |
| ATOM | 864 | CB  | LEU | A | 112 | 22.185 | -6.148  | 15.089 | 1.00 | 27.52 | C   |
| ATOM | 865 | CG  | LEU | A | 112 | 23.017 | -7.089  | 15.972 | 1.00 | 31.09 | C   |
| ATOM | 866 | CD1 | LEU | A | 112 | 22.946 | -8.557  | 15.481 | 1.00 | 26.90 | C   |
| ATOM | 867 | CD2 | LEU | A | 112 | 24.458 | -6.546  | 16.003 | 1.00 | 29.65 | C   |
| ATOM | 868 | N   | PRO | A | 113 | 23.112 | -3.565  | 14.288 | 1.00 | 29.08 | N   |
| ATOM | 869 | CA  | PRO | A | 113 | 23.734 | -2.245  | 14.101 | 1.00 | 31.20 | C   |
| ATOM | 870 | C   | PRO | A | 113 | 22.679 | -1.238  | 13.619 | 1.00 | 33.56 | C   |
| ATOM | 871 | O   | PRO | A | 113 | 21.661 | -1.636  | 12.981 | 1.00 | 31.23 | O   |
| ATOM | 872 | CB  | PRO | A | 113 | 24.818 | -2.486  | 13.030 | 1.00 | 29.19 | C   |
| ATOM | 873 | CG  | PRO | A | 113 | 24.576 | -3.877  | 12.496 | 1.00 | 28.17 | C   |
| ATOM | 874 | CD  | PRO | A | 113 | 23.241 | -4.343  | 13.047 | 1.00 | 29.64 | C   |
| ATOM | 875 | N   | ARG | A | 114 | 22.928 | 0.050   | 13.928 | 1.00 | 33.99 | N   |

|      |     |     |     |   |     |        |        |        |      |       |     |
|------|-----|-----|-----|---|-----|--------|--------|--------|------|-------|-----|
| ATOM | 876 | CA  | ARG | A | 114 | 21.881 | 1.077  | 13.890 | 1.00 | 32.55 | C   |
| ATOM | 877 | C   | ARG | A | 114 | 22.292 | 2.540  | 13.957 | 1.00 | 32.21 | C   |
| ATOM | 878 | O   | ARG | A | 114 | 21.575 | 3.391  | 13.430 | 1.00 | 31.11 | O   |
| ATOM | 879 | CB  | ARG | A | 114 | 20.905 | 0.809  | 15.017 | 1.00 | 33.18 | C   |
| ATOM | 880 | CG  | ARG | A | 114 | 19.953 | -0.281 | 14.661 | 1.00 | 36.64 | C   |
| ATOM | 881 | CD  | ARG | A | 114 | 19.020 | -0.467 | 15.750 | 1.00 | 39.87 | C   |
| ATOM | 882 | NE  | ARG | A | 114 | 18.517 | 0.826  | 16.159 | 1.00 | 43.15 | N   |
| ATOM | 883 | CZ  | ARG | A | 114 | 17.756 | 0.977  | 17.222 | 1.00 | 47.64 | C   |
| ATOM | 884 | NH1 | ARG | A | 114 | 17.324 | -0.119 | 17.852 | 1.00 | 51.30 | N1+ |
| ATOM | 885 | NH2 | ARG | A | 114 | 17.373 | 2.192  | 17.608 | 1.00 | 50.22 | N   |
| ATOM | 886 | N   | LEU | A | 115 | 23.284 | 2.864  | 14.788 | 1.00 | 33.02 | N   |
| ATOM | 887 | CA  | LEU | A | 115 | 23.491 | 4.243  | 15.202 | 1.00 | 33.18 | C   |
| ATOM | 888 | C   | LEU | A | 115 | 23.305 | 5.255  | 14.059 | 1.00 | 34.71 | C   |
| ATOM | 889 | O   | LEU | A | 115 | 22.386 | 6.065  | 14.145 | 1.00 | 35.24 | O   |
| ATOM | 890 | CB  | LEU | A | 115 | 24.860 | 4.423  | 15.860 | 1.00 | 32.34 | C   |
| ATOM | 891 | CG  | LEU | A | 115 | 25.037 | 5.442  | 17.017 | 1.00 | 31.68 | C   |
| ATOM | 892 | CD1 | LEU | A | 115 | 26.534 | 5.671  | 17.168 | 1.00 | 29.02 | C   |
| ATOM | 893 | CD2 | LEU | A | 115 | 24.324 | 6.786  | 16.764 | 1.00 | 26.36 | C   |
| ATOM | 894 | N   | VAL | A | 116 | 24.007 | 5.019  | 12.919 | 1.00 | 35.67 | N   |
| ATOM | 895 | CA  | VAL | A | 116 | 24.061 | 5.935  | 11.756 | 1.00 | 36.09 | C   |
| ATOM | 896 | C   | VAL | A | 116 | 22.692 | 6.478  | 11.298 | 1.00 | 37.34 | C   |
| ATOM | 897 | O   | VAL | A | 116 | 21.657 | 6.293  | 11.959 | 1.00 | 39.54 | O   |
| ATOM | 898 | CB  | VAL | A | 116 | 24.705 | 5.248  | 10.482 | 1.00 | 34.24 | C   |
| ATOM | 899 | CG1 | VAL | A | 116 | 26.241 | 4.937  | 10.734 | 1.00 | 33.93 | C   |
| ATOM | 900 | CG2 | VAL | A | 116 | 23.974 | 3.954  | 10.123 | 1.00 | 30.72 | C   |
| ATOM | 901 | N   | ARG | A | 117 | 22.732 | 7.203  | 10.185 | 1.00 | 37.72 | N   |
| ATOM | 902 | CA  | ARG | A | 117 | 21.486 | 7.644  | 9.511  | 1.00 | 40.29 | C   |
| ATOM | 903 | C   | ARG | A | 117 | 21.917 | 8.611  | 8.413  | 1.00 | 39.62 | C   |
| ATOM | 904 | O   | ARG | A | 117 | 23.104 | 8.596  | 8.037  | 1.00 | 41.35 | O   |
| ATOM | 905 | CB  | ARG | A | 117 | 20.547 | 8.386  | 10.490 | 1.00 | 42.16 | C   |
| ATOM | 906 | CG  | ARG | A | 117 | 19.116 | 7.763  | 10.656 | 1.00 | 46.39 | C   |
| ATOM | 907 | CD  | ARG | A | 117 | 18.704 | 7.899  | 12.134 | 1.00 | 51.79 | C   |
| ATOM | 908 | NE  | ARG | A | 117 | 19.092 | 9.229  | 12.637 | 1.00 | 56.27 | N   |
| ATOM | 909 | CZ  | ARG | A | 117 | 18.282 | 10.024 | 13.353 | 1.00 | 57.56 | C   |
| ATOM | 910 | NH1 | ARG | A | 117 | 18.086 | 11.271 | 12.915 | 1.00 | 57.16 | N1+ |
| ATOM | 911 | NH2 | ARG | A | 117 | 18.065 | 9.782  | 14.657 | 1.00 | 55.96 | N   |
| ATOM | 912 | N   | PRO | A | 118 | 20.982 | 9.415  | 7.863  | 1.00 | 37.83 | N   |
| ATOM | 913 | CA  | PRO | A | 118 | 21.179 | 10.738 | 7.262  | 1.00 | 38.11 | C   |
| ATOM | 914 | C   | PRO | A | 118 | 21.640 | 11.818 | 8.236  | 1.00 | 36.72 | C   |
| ATOM | 915 | O   | PRO | A | 118 | 21.590 | 11.611 | 9.463  | 1.00 | 38.18 | O   |
| ATOM | 916 | CB  | PRO | A | 118 | 19.774 | 11.075 | 6.712  | 1.00 | 38.53 | C   |
| ATOM | 917 | CG  | PRO | A | 118 | 18.892 | 10.088 | 7.386  | 1.00 | 38.63 | C   |
| ATOM | 918 | CD  | PRO | A | 118 | 19.697 | 8.870  | 7.443  | 1.00 | 37.42 | C   |
| ATOM | 919 | N   | GLU | A | 119 | 21.806 | 13.037 | 7.693  | 1.00 | 34.77 | N   |
| ATOM | 920 | CA  | GLU | A | 119 | 22.310 | 14.182 | 8.455  | 1.00 | 33.84 | C   |
| ATOM | 921 | C   | GLU | A | 119 | 22.333 | 15.588 | 7.791  | 1.00 | 31.31 | C   |
| ATOM | 922 | O   | GLU | A | 119 | 21.800 | 15.762 | 6.680  | 1.00 | 27.96 | O   |
| ATOM | 923 | CB  | GLU | A | 119 | 23.684 | 13.859 | 9.039  | 1.00 | 34.16 | C   |
| ATOM | 924 | CG  | GLU | A | 119 | 23.650 | 13.731 | 10.573 | 1.00 | 29.57 | C   |
| ATOM | 925 | CD  | GLU | A | 119 | 23.678 | 15.084 | 11.263 | 1.00 | 27.59 | C   |
| ATOM | 926 | OE1 | GLU | A | 119 | 24.804 | 15.594 | 11.417 | 1.00 | 25.30 | O   |
| ATOM | 927 | OE2 | GLU | A | 119 | 22.602 | 15.581 | 11.689 | 1.00 | 21.70 | O1- |
| ATOM | 928 | N   | VAL | A | 120 | 23.119 | 16.516 | 8.368  | 1.00 | 29.09 | N   |
| ATOM | 929 | CA  | VAL | A | 120 | 22.754 | 17.938 | 8.468  | 1.00 | 27.70 | C   |
| ATOM | 930 | C   | VAL | A | 120 | 21.995 | 18.387 | 7.264  | 1.00 | 27.84 | C   |
| ATOM | 931 | O   | VAL | A | 120 | 20.779 | 18.514 | 7.318  | 1.00 | 29.90 | O   |
| ATOM | 932 | CB  | VAL | A | 120 | 23.973 | 18.925 | 8.622  | 1.00 | 27.28 | C   |
| ATOM | 933 | CG1 | VAL | A | 120 | 23.965 | 19.580 | 10.005 | 1.00 | 25.95 | C   |
| ATOM | 934 | CG2 | VAL | A | 120 | 25.309 | 18.221 | 8.353  | 1.00 | 27.55 | C   |
| ATOM | 935 | N   | ASP | A | 121 | 22.688 | 18.398 | 6.131  | 1.00 | 28.02 | N   |
| ATOM | 936 | CA  | ASP | A | 121 | 22.234 | 19.108 | 4.946  | 1.00 | 26.82 | C   |
| ATOM | 937 | C   | ASP | A | 121 | 21.939 | 18.197 | 3.749  | 1.00 | 25.21 | C   |
| ATOM | 938 | O   | ASP | A | 121 | 21.035 | 18.483 | 2.953  | 1.00 | 23.24 | O   |
| ATOM | 939 | CB  | ASP | A | 121 | 23.247 | 20.212 | 4.560  | 1.00 | 25.99 | C   |
| ATOM | 940 | CG  | ASP | A | 121 | 24.676 | 19.899 | 5.019  | 1.00 | 26.35 | C   |
| ATOM | 941 | OD1 | ASP | A | 121 | 25.271 | 18.950 | 4.459  | 1.00 | 27.73 | O   |
| ATOM | 942 | OD2 | ASP | A | 121 | 25.210 | 20.583 | 5.923  | 1.00 | 21.53 | O1- |
| ATOM | 943 | N   | VAL | A | 122 | 22.591 | 17.041 | 3.682  | 1.00 | 23.49 | N   |
| ATOM | 944 | CA  | VAL | A | 122 | 22.769 | 16.383 | 2.386  | 1.00 | 25.51 | C   |
| ATOM | 945 | C   | VAL | A | 122 | 21.644 | 15.468 | 1.927  | 1.00 | 26.41 | C   |
| ATOM | 946 | O   | VAL | A | 122 | 21.527 | 15.180 | 0.732  | 1.00 | 25.53 | O   |

|      |      |     |     |   |     |        |        |         |      |       |     |
|------|------|-----|-----|---|-----|--------|--------|---------|------|-------|-----|
| ATOM | 947  | CB  | VAL | A | 122 | 24.124 | 15.616 | 2.299   | 1.00 | 25.87 | C   |
| ATOM | 948  | CG1 | VAL | A | 122 | 24.962 | 15.857 | 3.561   | 1.00 | 27.67 | C   |
| ATOM | 949  | CG2 | VAL | A | 122 | 23.896 | 14.114 | 2.031   | 1.00 | 25.34 | C   |
| ATOM | 950  | N   | MET | A | 123 | 20.814 | 15.019 | 2.867   | 1.00 | 29.60 | N   |
| ATOM | 951  | CA  | MET | A | 123 | 19.863 | 13.932 | 2.601   | 1.00 | 30.15 | C   |
| ATOM | 952  | C   | MET | A | 123 | 18.835 | 14.384 | 1.578   | 1.00 | 32.67 | C   |
| ATOM | 953  | O   | MET | A | 123 | 18.100 | 13.549 | 1.034   | 1.00 | 33.77 | O   |
| ATOM | 954  | CB  | MET | A | 123 | 19.148 | 13.469 | 3.889   | 1.00 | 27.54 | C   |
| ATOM | 955  | CG  | MET | A | 123 | 17.910 | 14.282 | 4.295   | 1.00 | 25.66 | C   |
| ATOM | 956  | SD  | MET | A | 123 | 18.202 | 15.511 | 5.615   | 1.00 | 22.74 | S   |
| ATOM | 957  | CE  | MET | A | 123 | 16.615 | 16.318 | 5.641   | 1.00 | 22.28 | C   |
| ATOM | 958  | N   | CYS | A | 124 | 18.756 | 15.707 | 1.361   | 1.00 | 32.18 | N   |
| ATOM | 959  | CA  | CYS | A | 124 | 17.895 | 16.302 | 0.328   | 1.00 | 29.82 | C   |
| ATOM | 960  | C   | CYS | A | 124 | 18.423 | 15.917 | -1.060  | 1.00 | 27.70 | C   |
| ATOM | 961  | O   | CYS | A | 124 | 19.457 | 16.417 | -1.503  | 1.00 | 27.67 | O   |
| ATOM | 962  | CB  | CYS | A | 124 | 17.879 | 17.819 | 0.455   | 1.00 | 27.21 | C   |
| ATOM | 963  | SG  | CYS | A | 124 | 17.768 | 18.608 | -1.174  | 1.00 | 27.90 | S   |
| ATOM | 964  | N   | ALA | A | 126 | 16.357 | 14.257 | -3.975  | 1.00 | 22.43 | N   |
| ATOM | 965  | CA  | ALA | A | 126 | 15.531 | 13.862 | -5.118  | 1.00 | 26.10 | C   |
| ATOM | 966  | C   | ALA | A | 126 | 16.012 | 14.663 | -6.335  | 1.00 | 27.83 | C   |
| ATOM | 967  | O   | ALA | A | 126 | 15.423 | 15.699 | -6.716  | 1.00 | 28.31 | O   |
| ATOM | 968  | CB  | ALA | A | 126 | 14.054 | 14.116 | -4.848  | 1.00 | 27.88 | C   |
| ATOM | 969  | N   | PHE | A | 127 | 17.206 | 14.284 | -6.793  | 1.00 | 27.19 | N   |
| ATOM | 970  | CA  | PHE | A | 127 | 17.877 | 14.923 | -7.916  | 1.00 | 25.57 | C   |
| ATOM | 971  | C   | PHE | A | 127 | 18.309 | 13.827 | -8.896  | 1.00 | 25.18 | C   |
| ATOM | 972  | O   | PHE | A | 127 | 17.915 | 13.833 | -10.062 | 1.00 | 24.40 | O   |
| ATOM | 973  | CB  | PHE | A | 127 | 19.107 | 15.705 | -7.422  | 1.00 | 25.50 | C   |
| ATOM | 974  | CG  | PHE | A | 127 | 18.819 | 16.683 | -6.298  | 1.00 | 24.31 | C   |
| ATOM | 975  | CD1 | PHE | A | 127 | 17.616 | 17.361 | -6.224  | 1.00 | 23.10 | C   |
| ATOM | 976  | CD2 | PHE | A | 127 | 19.761 | 16.911 | -5.307  | 1.00 | 24.98 | C   |
| ATOM | 977  | CE1 | PHE | A | 127 | 17.356 | 18.229 | -5.169  | 1.00 | 24.24 | C   |
| ATOM | 978  | CE2 | PHE | A | 127 | 19.507 | 17.792 | -4.260  | 1.00 | 23.55 | C   |
| ATOM | 979  | CZ  | PHE | A | 127 | 18.304 | 18.442 | -4.188  | 1.00 | 22.96 | C   |
| ATOM | 980  | N   | HIS | A | 128 | 19.093 | 12.872 | -8.395  | 1.00 | 23.97 | N   |
| ATOM | 981  | CA  | HIS | A | 128 | 19.603 | 11.748 | -9.190  | 1.00 | 25.06 | C   |
| ATOM | 982  | C   | HIS | A | 128 | 19.666 | 10.507 | -8.299  | 1.00 | 25.79 | C   |
| ATOM | 983  | O   | HIS | A | 128 | 20.736 | 9.885  | -8.155  | 1.00 | 24.46 | O   |
| ATOM | 984  | CB  | HIS | A | 128 | 21.006 | 12.060 | -9.762  | 1.00 | 26.48 | C   |
| ATOM | 985  | CG  | HIS | A | 128 | 21.630 | 10.926 | -10.528 | 1.00 | 26.14 | C   |
| ATOM | 986  | CD2 | HIS | A | 128 | 21.599 | 10.603 | -11.842 | 1.00 | 26.98 | C   |
| ATOM | 987  | ND1 | HIS | A | 128 | 22.404 | 9.955  | -9.919  | 1.00 | 25.60 | N   |
| ATOM | 988  | CE1 | HIS | A | 128 | 22.814 | 9.086  | -10.824 | 1.00 | 25.56 | C   |
| ATOM | 989  | NE2 | HIS | A | 128 | 22.341 | 9.456  | -11.999 | 1.00 | 26.11 | N   |
| ATOM | 990  | N   | ASP | A | 129 | 18.631 | 10.376 | -7.473  | 1.00 | 25.20 | N   |
| ATOM | 991  | CA  | ASP | A | 129 | 18.171 | 9.095  | -6.944  | 1.00 | 23.48 | C   |
| ATOM | 992  | C   | ASP | A | 129 | 17.157 | 9.345  | -5.843  | 1.00 | 24.69 | C   |
| ATOM | 993  | O   | ASP | A | 129 | 17.123 | 10.429 | -5.245  | 1.00 | 22.84 | O   |
| ATOM | 994  | CB  | ASP | A | 129 | 19.312 | 8.207  | -6.401  | 1.00 | 22.35 | C   |
| ATOM | 995  | CG  | ASP | A | 129 | 20.159 | 8.879  | -5.310  | 1.00 | 19.90 | C   |
| ATOM | 996  | OD1 | ASP | A | 129 | 19.796 | 9.960  | -4.801  | 1.00 | 16.62 | O   |
| ATOM | 997  | OD2 | ASP | A | 129 | 21.216 | 8.304  | -4.963  | 1.00 | 18.41 | O1- |
| ATOM | 998  | N   | GLU | A | 131 | 16.294 | 6.107  | -4.845  | 1.00 | 26.76 | N   |
| ATOM | 999  | CA  | GLU | A | 131 | 16.936 | 4.947  | -4.238  | 1.00 | 26.85 | C   |
| ATOM | 1000 | C   | GLU | A | 131 | 17.501 | 5.427  | -2.883  | 1.00 | 26.10 | C   |
| ATOM | 1001 | O   | GLU | A | 131 | 17.117 | 4.893  | -1.861  | 1.00 | 25.45 | O   |
| ATOM | 1002 | CB  | GLU | A | 131 | 18.035 | 4.384  | -5.180  | 1.00 | 25.89 | C   |
| ATOM | 1003 | CG  | GLU | A | 131 | 17.551 | 3.445  | -6.329  | 1.00 | 21.04 | C   |
| ATOM | 1004 | CD  | GLU | A | 131 | 16.340 | 3.971  | -7.147  | 1.00 | 22.14 | C   |
| ATOM | 1005 | OE1 | GLU | A | 131 | 16.533 | 4.847  | -8.019  | 1.00 | 19.96 | O   |
| ATOM | 1006 | OE2 | GLU | A | 131 | 15.222 | 3.409  | -7.018  | 1.00 | 19.19 | O1- |
| ATOM | 1007 | N   | GLU | A | 132 | 18.176 | 6.583  | -2.862  | 1.00 | 27.14 | N   |
| ATOM | 1008 | CA  | GLU | A | 132 | 18.411 | 7.302  | -1.593  | 1.00 | 27.48 | C   |
| ATOM | 1009 | C   | GLU | A | 132 | 17.082 | 7.842  | -1.037  | 1.00 | 28.11 | C   |
| ATOM | 1010 | O   | GLU | A | 132 | 16.106 | 7.962  | -1.754  | 1.00 | 24.38 | O   |
| ATOM | 1011 | CB  | GLU | A | 132 | 19.392 | 8.487  | -1.758  | 1.00 | 26.09 | C   |
| ATOM | 1012 | CG  | GLU | A | 132 | 20.903 | 8.155  | -1.682  | 1.00 | 25.28 | C   |
| ATOM | 1013 | CD  | GLU | A | 132 | 21.435 | 7.896  | -0.264  | 1.00 | 21.57 | C   |
| ATOM | 1014 | OE1 | GLU | A | 132 | 21.255 | 6.778  | 0.262   | 1.00 | 19.27 | O   |
| ATOM | 1015 | OE2 | GLU | A | 132 | 22.139 | 8.767  | 0.272   | 1.00 | 15.77 | O1- |
| ATOM | 1016 | N   | THR | A | 133 | 17.137 | 8.383  | 0.170   | 1.00 | 30.85 | N   |
| ATOM | 1017 | CA  | THR | A | 133 | 15.943 | 8.621  | 0.974   | 1.00 | 33.25 | C   |

|      |      |     |     |   |     |        |        |        |      |       |     |
|------|------|-----|-----|---|-----|--------|--------|--------|------|-------|-----|
| ATOM | 1018 | C   | THR | A | 133 | 14.702 | 7.774  | 0.628  | 1.00 | 34.75 | C   |
| ATOM | 1019 | O   | THR | A | 133 | 14.606 | 6.619  | 1.090  | 1.00 | 36.23 | O   |
| ATOM | 1020 | CB  | THR | A | 133 | 15.615 | 10.107 | 0.979  | 1.00 | 34.23 | C   |
| ATOM | 1021 | CG2 | THR | A | 133 | 16.767 | 10.868 | 1.680  | 1.00 | 36.08 | C   |
| ATOM | 1022 | OG1 | THR | A | 133 | 15.497 | 10.586 | -0.370 | 1.00 | 35.21 | O   |
| ATOM | 1023 | N   | PHE | A | 134 | 13.798 | 8.301  | -0.209 | 1.00 | 34.14 | N   |
| ATOM | 1024 | CA  | PHE | A | 134 | 12.474 | 7.689  | -0.444 | 1.00 | 32.44 | C   |
| ATOM | 1025 | C   | PHE | A | 134 | 12.485 | 6.162  | -0.360 | 1.00 | 32.71 | C   |
| ATOM | 1026 | O   | PHE | A | 134 | 11.952 | 5.604  | 0.584  | 1.00 | 35.71 | O   |
| ATOM | 1027 | CB  | PHE | A | 134 | 11.886 | 8.175  | -1.787 | 1.00 | 30.94 | C   |
| ATOM | 1028 | CG  | PHE | A | 134 | 11.252 | 7.086  | -2.630 | 1.00 | 29.00 | C   |
| ATOM | 1029 | CD1 | PHE | A | 134 | 10.070 | 6.474  | -2.245 | 1.00 | 30.88 | C   |
| ATOM | 1030 | CD2 | PHE | A | 134 | 11.853 | 6.672  | -3.805 | 1.00 | 28.45 | C   |
| ATOM | 1031 | CE1 | PHE | A | 134 | 9.508  | 5.473  | -3.015 | 1.00 | 29.95 | C   |
| ATOM | 1032 | CE2 | PHE | A | 134 | 11.302 | 5.674  | -4.585 | 1.00 | 28.90 | C   |
| ATOM | 1033 | CZ  | PHE | A | 134 | 10.132 | 5.074  | -4.191 | 1.00 | 31.63 | C   |
| ATOM | 1034 | N   | LEU | A | 135 | 13.227 | 5.508  | -1.242 | 1.00 | 32.49 | N   |
| ATOM | 1035 | CA  | LEU | A | 135 | 13.400 | 4.061  | -1.193 | 1.00 | 32.55 | C   |
| ATOM | 1036 | C   | LEU | A | 135 | 14.020 | 3.666  | 0.150  | 1.00 | 32.40 | C   |
| ATOM | 1037 | O   | LEU | A | 135 | 13.384 | 2.984  | 0.946  | 1.00 | 33.86 | O   |
| ATOM | 1038 | CB  | LEU | A | 135 | 14.295 | 3.623  | -2.362 | 1.00 | 34.15 | C   |
| ATOM | 1039 | CG  | LEU | A | 135 | 14.898 | 2.211  | -2.532 | 1.00 | 37.12 | C   |
| ATOM | 1040 | CD1 | LEU | A | 135 | 14.673 | 1.676  | -3.994 | 1.00 | 35.21 | C   |
| ATOM | 1041 | CD2 | LEU | A | 135 | 16.396 | 2.278  | -2.232 | 1.00 | 33.42 | C   |
| ATOM | 1042 | N   | LYS | A | 136 | 15.169 | 4.258  | 0.477  | 1.00 | 32.96 | N   |
| ATOM | 1043 | CA  | LYS | A | 136 | 15.967 | 3.890  | 1.662  | 1.00 | 31.27 | C   |
| ATOM | 1044 | C   | LYS | A | 136 | 15.382 | 4.437  | 2.974  | 1.00 | 30.10 | C   |
| ATOM | 1045 | O   | LYS | A | 136 | 16.095 | 4.623  | 3.975  | 1.00 | 27.30 | O   |
| ATOM | 1046 | CB  | LYS | A | 136 | 17.429 | 4.370  | 1.501  | 1.00 | 30.80 | C   |
| ATOM | 1047 | CG  | LYS | A | 136 | 18.317 | 3.488  | 0.613  | 1.00 | 25.87 | C   |
| ATOM | 1048 | CD  | LYS | A | 136 | 19.724 | 4.099  | 0.430  | 1.00 | 25.64 | C   |
| ATOM | 1049 | CE  | LYS | A | 136 | 20.846 | 3.309  | 1.182  | 1.00 | 21.64 | C   |
| ATOM | 1050 | NZ  | LYS | A | 136 | 22.219 | 3.921  | 1.063  | 1.00 | 11.74 | N1+ |
| ATOM | 1051 | N   | LYS | A | 137 | 14.073 | 4.642  | 2.986  | 1.00 | 28.98 | N   |
| ATOM | 1052 | CA  | LYS | A | 137 | 13.340 | 4.610  | 4.251  | 1.00 | 27.29 | C   |
| ATOM | 1053 | C   | LYS | A | 137 | 12.719 | 3.231  | 4.562  | 1.00 | 25.01 | C   |
| ATOM | 1054 | O   | LYS | A | 137 | 11.769 | 3.148  | 5.343  | 1.00 | 19.88 | O   |
| ATOM | 1055 | CB  | LYS | A | 137 | 12.267 | 5.703  | 4.278  | 1.00 | 27.89 | C   |
| ATOM | 1056 | CG  | LYS | A | 137 | 11.043 | 5.458  | 3.424  | 1.00 | 25.43 | C   |
| ATOM | 1057 | CD  | LYS | A | 137 | 10.013 | 6.549  | 3.657  | 1.00 | 24.61 | C   |
| ATOM | 1058 | CE  | LYS | A | 137 | 9.532  | 6.581  | 5.121  | 1.00 | 25.80 | C   |
| ATOM | 1059 | NZ  | LYS | A | 137 | 10.478 | 7.205  | 6.080  | 1.00 | 22.10 | N1+ |
| ATOM | 1060 | N   | TYR | A | 138 | 13.261 | 2.170  | 3.944  | 1.00 | 23.60 | N   |
| ATOM | 1061 | CA  | TYR | A | 138 | 12.987 | 0.797  | 4.367  | 1.00 | 23.57 | C   |
| ATOM | 1062 | C   | TYR | A | 138 | 14.201 | -0.014 | 4.898  | 1.00 | 25.14 | C   |
| ATOM | 1063 | O   | TYR | A | 138 | 14.157 | -0.518 | 6.019  | 1.00 | 26.51 | O   |
| ATOM | 1064 | CB  | TYR | A | 138 | 12.287 | 0.013  | 3.262  | 1.00 | 23.90 | C   |
| ATOM | 1065 | CG  | TYR | A | 138 | 11.095 | 0.708  | 2.626  | 1.00 | 23.12 | C   |
| ATOM | 1066 | CD1 | TYR | A | 138 | 10.272 | 1.532  | 3.375  | 1.00 | 21.31 | C   |
| ATOM | 1067 | CD2 | TYR | A | 138 | 10.950 | 0.725  | 1.238  | 1.00 | 20.04 | C   |
| ATOM | 1068 | CE1 | TYR | A | 138 | 9.396  | 2.388  | 2.764  | 1.00 | 21.87 | C   |
| ATOM | 1069 | CE2 | TYR | A | 138 | 10.096 | 1.584  | 0.627  | 1.00 | 18.89 | C   |
| ATOM | 1070 | CZ  | TYR | A | 138 | 9.347  | 2.451  | 1.385  | 1.00 | 19.37 | C   |
| ATOM | 1071 | OH  | TYR | A | 138 | 8.863  | 3.599  | 0.796  | 1.00 | 16.36 | O   |
| ATOM | 1072 | N   | LEU | A | 139 | 15.348 | -0.004 | 4.229  | 1.00 | 26.31 | N   |
| ATOM | 1073 | CA  | LEU | A | 139 | 16.544 | -0.492 | 4.932  | 1.00 | 28.30 | C   |
| ATOM | 1074 | C   | LEU | A | 139 | 16.903 | 0.423  | 6.137  | 1.00 | 30.40 | C   |
| ATOM | 1075 | O   | LEU | A | 139 | 18.050 | 0.459  | 6.603  | 1.00 | 33.77 | O   |
| ATOM | 1076 | CB  | LEU | A | 139 | 17.764 | -0.643 | 3.987  | 1.00 | 23.98 | C   |
| ATOM | 1077 | CG  | LEU | A | 139 | 18.987 | -1.356 | 4.621  | 1.00 | 21.06 | C   |
| ATOM | 1078 | CD1 | LEU | A | 139 | 19.161 | -2.769 | 4.075  | 1.00 | 15.84 | C   |
| ATOM | 1079 | CD2 | LEU | A | 139 | 20.249 | -0.513 | 4.429  | 1.00 | 18.03 | C   |
| ATOM | 1080 | N   | TYR | A | 140 | 15.914 | 1.125  | 6.676  | 1.00 | 28.28 | N   |
| ATOM | 1081 | CA  | TYR | A | 140 | 16.160 | 2.032  | 7.782  | 1.00 | 27.48 | C   |
| ATOM | 1082 | C   | TYR | A | 140 | 14.903 | 2.160  | 8.640  | 1.00 | 26.31 | C   |
| ATOM | 1083 | O   | TYR | A | 140 | 14.644 | 1.316  | 9.484  | 1.00 | 25.70 | O   |
| ATOM | 1084 | CB  | TYR | A | 140 | 16.555 | 3.370  | 7.196  | 1.00 | 29.37 | C   |
| ATOM | 1085 | CG  | TYR | A | 140 | 18.029 | 3.568  | 7.070  | 1.00 | 32.07 | C   |
| ATOM | 1086 | CD1 | TYR | A | 140 | 18.907 | 2.754  | 7.774  | 1.00 | 32.26 | C   |
| ATOM | 1087 | CD2 | TYR | A | 140 | 18.511 | 4.785  | 6.615  | 1.00 | 35.07 | C   |
| ATOM | 1088 | CE1 | TYR | A | 140 | 20.189 | 3.177  | 8.085  | 1.00 | 31.31 | C   |



|      |      |     |     |   |     |        |        |        |      |       |     |
|------|------|-----|-----|---|-----|--------|--------|--------|------|-------|-----|
| ATOM | 1089 | CE2 | TYR | A | 140 | 19.788 | 5.220  | 6.938  | 1.00 | 34.45 | C   |
| ATOM | 1090 | CZ  | TYR | A | 140 | 20.604 | 4.429  | 7.691  | 1.00 | 30.17 | C   |
| ATOM | 1091 | OH  | TYR | A | 140 | 21.706 | 5.009  | 8.252  | 1.00 | 30.52 | O   |
| ATOM | 1092 | N   | GLU | A | 141 | 13.993 | 3.007  | 8.184  | 1.00 | 27.43 | N   |
| ATOM | 1093 | CA  | GLU | A | 141 | 12.635 | 3.080  | 8.702  | 1.00 | 26.66 | C   |
| ATOM | 1094 | C   | GLU | A | 141 | 11.830 | 1.793  | 8.474  | 1.00 | 25.94 | C   |
| ATOM | 1095 | O   | GLU | A | 141 | 10.589 | 1.841  | 8.394  | 1.00 | 24.42 | O   |
| ATOM | 1096 | CB  | GLU | A | 141 | 11.920 | 4.269  | 8.058  | 1.00 | 27.66 | C   |
| ATOM | 1097 | CG  | GLU | A | 141 | 12.753 | 5.571  | 8.070  | 1.00 | 28.85 | C   |
| ATOM | 1098 | CD  | GLU | A | 141 | 12.126 | 6.665  | 8.930  | 1.00 | 30.04 | C   |
| ATOM | 1099 | OE1 | GLU | A | 141 | 12.059 | 6.463  | 10.169 | 1.00 | 28.05 | O   |
| ATOM | 1100 | OE2 | GLU | A | 141 | 11.684 | 7.706  | 8.368  | 1.00 | 27.92 | O1- |
| ATOM | 1101 | N   | ILE | A | 142 | 12.543 | 0.668  | 8.301  | 1.00 | 25.02 | N   |
| ATOM | 1102 | CA  | ILE | A | 142 | 11.959 | -0.670 | 8.411  | 1.00 | 23.92 | C   |
| ATOM | 1103 | C   | ILE | A | 142 | 12.891 | -1.879 | 8.483  | 1.00 | 22.66 | C   |
| ATOM | 1104 | O   | ILE | A | 142 | 12.422 | -3.019 | 8.460  | 1.00 | 21.14 | O   |
| ATOM | 1105 | CB  | ILE | A | 142 | 10.920 | -0.960 | 7.307  | 1.00 | 25.56 | C   |
| ATOM | 1106 | CG1 | ILE | A | 142 | 9.839  | -1.855 | 7.893  | 1.00 | 31.26 | C   |
| ATOM | 1107 | CG2 | ILE | A | 142 | 11.533 | -1.747 | 6.136  | 1.00 | 26.16 | C   |
| ATOM | 1108 | CD1 | ILE | A | 142 | 9.808  | -1.835 | 9.391  | 1.00 | 32.34 | C   |
| ATOM | 1109 | N   | ALA | A | 143 | 14.192 | -1.655 | 8.574  | 1.00 | 21.53 | N   |
| ATOM | 1110 | CA  | ALA | A | 143 | 15.080 | -2.739 | 8.995  | 1.00 | 21.28 | C   |
| ATOM | 1111 | C   | ALA | A | 143 | 15.259 | -2.555 | 10.491 | 1.00 | 21.40 | C   |
| ATOM | 1112 | O   | ALA | A | 143 | 15.077 | -3.478 | 11.295 | 1.00 | 20.55 | O   |
| ATOM | 1113 | CB  | ALA | A | 143 | 16.437 | -2.637 | 8.279  | 1.00 | 20.32 | C   |
| ATOM | 1114 | N   | ARG | A | 144 | 15.496 | -1.300 | 10.850 | 1.00 | 21.00 | N   |
| ATOM | 1115 | CA  | ARG | A | 144 | 15.726 | -0.906 | 12.216 | 1.00 | 21.33 | C   |
| ATOM | 1116 | C   | ARG | A | 144 | 14.498 | -1.163 | 13.053 | 1.00 | 21.04 | C   |
| ATOM | 1117 | O   | ARG | A | 144 | 13.397 | -0.738 | 12.694 | 1.00 | 20.32 | O   |
| ATOM | 1118 | CB  | ARG | A | 144 | 16.052 | 0.577  | 12.271 | 1.00 | 21.01 | C   |
| ATOM | 1119 | CG  | ARG | A | 144 | 17.510 | 0.863  | 12.247 | 1.00 | 17.71 | C   |
| ATOM | 1120 | CD  | ARG | A | 144 | 18.023 | 1.041  | 10.857 | 1.00 | 17.22 | C   |
| ATOM | 1121 | NE  | ARG | A | 144 | 18.645 | 2.342  | 10.630 | 1.00 | 18.81 | N   |
| ATOM | 1122 | CZ  | ARG | A | 144 | 19.496 | 2.950  | 11.447 | 1.00 | 17.78 | C   |
| ATOM | 1123 | NH1 | ARG | A | 144 | 19.398 | 2.791  | 12.749 | 1.00 | 22.32 | N1+ |
| ATOM | 1124 | NH2 | ARG | A | 144 | 20.194 | 3.978  | 11.001 | 1.00 | 19.08 | N   |
| ATOM | 1125 | N   | ARG | A | 145 | 14.686 | -1.933 | 14.117 | 1.00 | 22.67 | N   |
| ATOM | 1126 | CA  | ARG | A | 145 | 13.838 | -1.888 | 15.297 | 1.00 | 22.80 | C   |
| ATOM | 1127 | C   | ARG | A | 145 | 12.341 | -1.995 | 14.978 | 1.00 | 23.74 | C   |
| ATOM | 1128 | O   | ARG | A | 145 | 11.492 | -1.697 | 15.827 | 1.00 | 24.29 | O   |
| ATOM | 1129 | CB  | ARG | A | 145 | 14.150 | -0.595 | 16.060 | 1.00 | 23.74 | C   |
| ATOM | 1130 | CG  | ARG | A | 145 | 13.284 | 0.605  | 15.663 | 1.00 | 24.56 | C   |
| ATOM | 1131 | CD  | ARG | A | 145 | 14.041 | 1.882  | 15.206 | 1.00 | 23.54 | C   |
| ATOM | 1132 | NE  | ARG | A | 145 | 13.036 | 2.868  | 14.811 | 1.00 | 23.80 | N   |
| ATOM | 1133 | CZ  | ARG | A | 145 | 13.214 | 3.859  | 13.954 | 1.00 | 24.48 | C   |
| ATOM | 1134 | NH1 | ARG | A | 145 | 14.272 | 4.656  | 14.069 | 1.00 | 24.11 | N1+ |
| ATOM | 1135 | NH2 | ARG | A | 145 | 12.154 | 4.288  | 13.278 | 1.00 | 24.06 | N   |
| ATOM | 1136 | N   | HIS | A | 146 | 12.021 | -2.380 | 13.739 | 1.00 | 23.24 | N   |
| ATOM | 1137 | CA  | HIS | A | 146 | 10.633 | -2.505 | 13.276 | 1.00 | 21.90 | C   |
| ATOM | 1138 | C   | HIS | A | 146 | 10.413 | -3.719 | 12.380 | 1.00 | 19.01 | C   |
| ATOM | 1139 | O   | HIS | A | 146 | 9.649  | -3.649 | 11.433 | 1.00 | 15.22 | O   |
| ATOM | 1140 | CB  | HIS | A | 146 | 10.196 | -1.244 | 12.519 | 1.00 | 21.14 | C   |
| ATOM | 1141 | CG  | HIS | A | 146 | 10.226 | -0.013 | 13.357 | 1.00 | 23.07 | C   |
| ATOM | 1142 | CD2 | HIS | A | 146 | 10.883 | 1.158  | 13.170 | 1.00 | 24.02 | C   |
| ATOM | 1143 | ND1 | HIS | A | 146 | 9.778  | 0.000  | 14.658 | 1.00 | 21.23 | N   |
| ATOM | 1144 | CE1 | HIS | A | 146 | 10.178 | 1.100  | 15.251 | 1.00 | 24.29 | C   |
| ATOM | 1145 | NE2 | HIS | A | 146 | 10.844 | 1.831  | 14.373 | 1.00 | 24.47 | N   |
| ATOM | 1146 | N   | PRO | A | 147 | 10.896 | -4.885 | 12.783 | 1.00 | 18.32 | N   |
| ATOM | 1147 | CA  | PRO | A | 147 | 10.624 | -5.945 | 11.843 | 1.00 | 19.37 | C   |
| ATOM | 1148 | C   | PRO | A | 147 | 9.128  | -6.280 | 11.753 | 1.00 | 24.48 | C   |
| ATOM | 1149 | O   | PRO | A | 147 | 8.718  | -6.993 | 10.833 | 1.00 | 27.95 | O   |
| ATOM | 1150 | CB  | PRO | A | 147 | 11.461 | -7.097 | 12.365 | 1.00 | 17.35 | C   |
| ATOM | 1151 | CG  | PRO | A | 147 | 12.544 | -6.430 | 13.108 | 1.00 | 17.68 | C   |
| ATOM | 1152 | CD  | PRO | A | 147 | 11.866 | -5.332 | 13.806 | 1.00 | 18.03 | C   |
| ATOM | 1153 | N   | TYR | A | 148 | 8.294  | -5.713 | 12.629 | 1.00 | 24.82 | N   |
| ATOM | 1154 | CA  | TYR | A | 148 | 6.868  | -6.045 | 12.564 | 1.00 | 25.01 | C   |
| ATOM | 1155 | C   | TYR | A | 148 | 6.009  | -4.990 | 11.846 | 1.00 | 26.88 | C   |
| ATOM | 1156 | O   | TYR | A | 148 | 5.048  | -5.353 | 11.167 | 1.00 | 29.08 | O   |
| ATOM | 1157 | CB  | TYR | A | 148 | 6.326  | -6.357 | 13.960 | 1.00 | 21.84 | C   |
| ATOM | 1158 | CG  | TYR | A | 148 | 6.986  | -7.573 | 14.586 | 1.00 | 20.84 | C   |
| ATOM | 1159 | CD1 | TYR | A | 148 | 8.272  | -7.502 | 15.093 | 1.00 | 21.27 | C   |

|      |      |     |     |   |     |        |         |        |      |       |     |
|------|------|-----|-----|---|-----|--------|---------|--------|------|-------|-----|
| ATOM | 1160 | CD2 | TYR | A | 148 | 6.368  | -8.812  | 14.576 | 1.00 | 21.92 | C   |
| ATOM | 1161 | CE1 | TYR | A | 148 | 8.926  | -8.629  | 15.558 | 1.00 | 18.20 | C   |
| ATOM | 1162 | CE2 | TYR | A | 148 | 7.019  | -9.947  | 15.036 | 1.00 | 19.43 | C   |
| ATOM | 1163 | CZ  | TYR | A | 148 | 8.298  | -9.843  | 15.521 | 1.00 | 17.54 | C   |
| ATOM | 1164 | OH  | TYR | A | 148 | 8.966  | -10.954 | 15.973 | 1.00 | 19.26 | O   |
| ATOM | 1165 | N   | PHE | A | 149 | 6.519  | -3.755  | 11.776 | 1.00 | 26.54 | N   |
| ATOM | 1166 | CA  | PHE | A | 149 | 5.862  | -2.630  | 11.080 | 1.00 | 23.95 | C   |
| ATOM | 1167 | C   | PHE | A | 149 | 4.992  | -3.027  | 9.893  | 1.00 | 23.50 | C   |
| ATOM | 1168 | O   | PHE | A | 149 | 5.444  | -3.643  | 8.915  | 1.00 | 20.73 | O   |
| ATOM | 1169 | CB  | PHE | A | 149 | 6.892  | -1.578  | 10.614 | 1.00 | 19.95 | C   |
| ATOM | 1170 | CG  | PHE | A | 149 | 6.368  | -0.157  | 10.584 | 1.00 | 18.95 | C   |
| ATOM | 1171 | CD1 | PHE | A | 149 | 5.244  | 0.189   | 9.840  | 1.00 | 21.19 | C   |
| ATOM | 1172 | CD2 | PHE | A | 149 | 7.044  | 0.853   | 11.240 | 1.00 | 17.97 | C   |
| ATOM | 1173 | CE1 | PHE | A | 149 | 4.814  | 1.514   | 9.748  | 1.00 | 17.03 | C   |
| ATOM | 1174 | CE2 | PHE | A | 149 | 6.613  | 2.177   | 11.152 | 1.00 | 17.64 | C   |
| ATOM | 1175 | CZ  | PHE | A | 149 | 5.501  | 2.501   | 10.402 | 1.00 | 13.77 | C   |
| ATOM | 1176 | N   | ALA | A | 151 | 3.646  | -2.885  | 6.915  | 1.00 | 16.85 | N   |
| ATOM | 1177 | CA  | ALA | A | 151 | 3.539  | -2.791  | 5.463  | 1.00 | 14.78 | C   |
| ATOM | 1178 | C   | ALA | A | 151 | 2.681  | -1.614  | 4.972  | 1.00 | 15.60 | C   |
| ATOM | 1179 | O   | ALA | A | 151 | 3.223  | -0.518  | 4.831  | 1.00 | 17.98 | O   |
| ATOM | 1180 | CB  | ALA | A | 151 | 3.038  | -4.104  | 4.884  | 1.00 | 13.97 | C   |
| ATOM | 1181 | N   | PRO | A | 152 | 1.346  | -1.776  | 4.762  | 1.00 | 13.15 | N   |
| ATOM | 1182 | CA  | PRO | A | 152 | 0.722  | -0.739  | 3.932  | 1.00 | 9.23  | C   |
| ATOM | 1183 | C   | PRO | A | 152 | 0.901  | 0.647   | 4.494  | 1.00 | 9.42  | C   |
| ATOM | 1184 | O   | PRO | A | 152 | 1.203  | 1.559   | 3.742  | 1.00 | 12.31 | O   |
| ATOM | 1185 | CB  | PRO | A | 152 | -0.746 | -1.137  | 3.863  | 1.00 | 3.96  | C   |
| ATOM | 1186 | CG  | PRO | A | 152 | -0.950 | -1.981  | 4.978  | 1.00 | 9.07  | C   |
| ATOM | 1187 | CD  | PRO | A | 152 | 0.329  | -2.722  | 5.244  | 1.00 | 12.15 | C   |
| ATOM | 1188 | N   | GLU | A | 153 | 1.031  | 0.730   | 5.816  | 1.00 | 11.50 | N   |
| ATOM | 1189 | CA  | GLU | A | 153 | 1.234  | 2.006   | 6.514  | 1.00 | 9.86  | C   |
| ATOM | 1190 | C   | GLU | A | 153 | 2.605  | 2.638   | 6.305  | 1.00 | 10.68 | C   |
| ATOM | 1191 | O   | GLU | A | 153 | 2.752  | 3.857   | 6.337  | 1.00 | 9.78  | O   |
| ATOM | 1192 | CB  | GLU | A | 153 | 0.971  | 1.828   | 7.995  | 1.00 | 5.51  | C   |
| ATOM | 1193 | CG  | GLU | A | 153 | -0.476 | 2.003   | 8.348  | 1.00 | 7.11  | C   |
| ATOM | 1194 | CD  | GLU | A | 153 | -0.969 | 3.409   | 8.114  | 1.00 | 7.65  | C   |
| ATOM | 1195 | OE1 | GLU | A | 153 | -0.136 | 4.313   | 8.022  | 1.00 | 5.80  | O   |
| ATOM | 1196 | OE2 | GLU | A | 153 | -2.194 | 3.611   | 8.020  | 1.00 | 11.12 | O1- |
| ATOM | 1197 | N   | LEU | A | 154 | 3.597  | 1.806   | 6.027  | 1.00 | 13.56 | N   |
| ATOM | 1198 | CA  | LEU | A | 154 | 4.861  | 2.287   | 5.484  | 1.00 | 17.58 | C   |
| ATOM | 1199 | C   | LEU | A | 154 | 4.729  | 2.816   | 4.045  | 1.00 | 19.77 | C   |
| ATOM | 1200 | O   | LEU | A | 154 | 5.245  | 3.881   | 3.731  | 1.00 | 19.71 | O   |
| ATOM | 1201 | CB  | LEU | A | 154 | 5.914  | 1.189   | 5.541  | 1.00 | 14.47 | C   |
| ATOM | 1202 | CG  | LEU | A | 154 | 7.016  | 1.644   | 6.467  | 1.00 | 16.08 | C   |
| ATOM | 1203 | CD1 | LEU | A | 154 | 8.162  | 0.670   | 6.454  | 1.00 | 16.69 | C   |
| ATOM | 1204 | CD2 | LEU | A | 154 | 7.461  | 3.019   | 6.022  | 1.00 | 19.40 | C   |
| ATOM | 1205 | N   | LEU | A | 155 | 3.982  | 2.112   | 3.201  | 1.00 | 20.63 | N   |
| ATOM | 1206 | CA  | LEU | A | 155 | 3.669  | 2.622   | 1.872  | 1.00 | 22.58 | C   |
| ATOM | 1207 | C   | LEU | A | 155 | 2.916  | 3.949   | 2.012  | 1.00 | 25.56 | C   |
| ATOM | 1208 | O   | LEU | A | 155 | 3.099  | 4.850   | 1.190  | 1.00 | 27.00 | O   |
| ATOM | 1209 | CB  | LEU | A | 155 | 2.801  | 1.636   | 1.075  | 1.00 | 19.65 | C   |
| ATOM | 1210 | CG  | LEU | A | 155 | 3.080  | 0.133   | 1.019  | 1.00 | 17.19 | C   |
| ATOM | 1211 | CD1 | LEU | A | 155 | 3.069  | -0.273  | -0.422 | 1.00 | 18.14 | C   |
| ATOM | 1212 | CD2 | LEU | A | 155 | 4.396  | -0.259  | 1.647  | 1.00 | 17.17 | C   |
| ATOM | 1213 | N   | PHE | A | 156 | 2.120  | 4.101   | 3.079  | 1.00 | 26.64 | N   |
| ATOM | 1214 | CA  | PHE | A | 156 | 1.490  | 5.403   | 3.375  | 1.00 | 26.26 | C   |
| ATOM | 1215 | C   | PHE | A | 156 | 2.460  | 6.391   | 4.033  | 1.00 | 24.10 | C   |
| ATOM | 1216 | O   | PHE | A | 156 | 2.373  | 7.601   | 3.814  | 1.00 | 23.49 | O   |
| ATOM | 1217 | CB  | PHE | A | 156 | 0.240  | 5.268   | 4.260  | 1.00 | 23.92 | C   |
| ATOM | 1218 | CG  | PHE | A | 156 | -0.286 | 6.590   | 4.749  | 1.00 | 21.57 | C   |
| ATOM | 1219 | CD1 | PHE | A | 156 | -0.843 | 7.500   | 3.865  | 1.00 | 20.83 | C   |
| ATOM | 1220 | CD2 | PHE | A | 156 | -0.113 | 6.977   | 6.066  | 1.00 | 20.34 | C   |
| ATOM | 1221 | CE1 | PHE | A | 156 | -1.209 | 8.766   | 4.286  | 1.00 | 16.36 | C   |
| ATOM | 1222 | CE2 | PHE | A | 156 | -0.481 | 8.251   | 6.492  | 1.00 | 17.60 | C   |
| ATOM | 1223 | CZ  | PHE | A | 156 | -1.029 | 9.140   | 5.594  | 1.00 | 16.53 | C   |
| ATOM | 1224 | N   | PHE | A | 157 | 3.415  | 5.874   | 4.791  | 1.00 | 21.35 | N   |
| ATOM | 1225 | CA  | PHE | A | 157 | 4.441  | 6.724   | 5.339  | 1.00 | 21.42 | C   |
| ATOM | 1226 | C   | PHE | A | 157 | 5.657  | 6.859   | 4.427  | 1.00 | 22.33 | C   |
| ATOM | 1227 | O   | PHE | A | 157 | 6.712  | 7.303   | 4.879  | 1.00 | 23.73 | O   |
| ATOM | 1228 | CB  | PHE | A | 157 | 4.863  | 6.195   | 6.700  | 1.00 | 21.49 | C   |
| ATOM | 1229 | CG  | PHE | A | 157 | 4.238  | 6.920   | 7.846  | 1.00 | 17.83 | C   |
| ATOM | 1230 | CD1 | PHE | A | 157 | 3.628  | 8.139   | 7.652  | 1.00 | 17.24 | C   |

|      |      |     |     |   |     |        |        |        |      |       |     |
|------|------|-----|-----|---|-----|--------|--------|--------|------|-------|-----|
| ATOM | 1231 | CD2 | PHE | A | 157 | 4.376  | 6.444  | 9.120  | 1.00 | 19.41 | C   |
| ATOM | 1232 | CE1 | PHE | A | 157 | 3.197  | 8.872  | 8.688  | 1.00 | 14.49 | C   |
| ATOM | 1233 | CE2 | PHE | A | 157 | 3.948  | 7.170  | 10.159 | 1.00 | 18.81 | C   |
| ATOM | 1234 | CZ  | PHE | A | 157 | 3.362  | 8.398  | 9.940  | 1.00 | 20.97 | C   |
| ATOM | 1235 | N   | ALA | A | 158 | 5.524  | 6.405  | 3.175  | 1.00 | 23.41 | N   |
| ATOM | 1236 | CA  | ALA | A | 158 | 6.590  | 6.492  | 2.160  | 1.00 | 21.51 | C   |
| ATOM | 1237 | C   | ALA | A | 158 | 6.383  | 7.773  | 1.393  | 1.00 | 22.27 | C   |
| ATOM | 1238 | O   | ALA | A | 158 | 7.251  | 8.647  | 1.377  | 1.00 | 22.61 | O   |
| ATOM | 1239 | CB  | ALA | A | 158 | 6.526  | 5.321  | 1.199  | 1.00 | 16.28 | C   |
| ATOM | 1240 | N   | LYS | A | 159 | 5.185  | 7.930  | 0.840  | 1.00 | 22.44 | N   |
| ATOM | 1241 | CA  | LYS | A | 159 | 4.829  | 9.184  | 0.200  | 1.00 | 21.86 | C   |
| ATOM | 1242 | C   | LYS | A | 159 | 5.146  | 10.345 | 1.144  | 1.00 | 23.62 | C   |
| ATOM | 1243 | O   | LYS | A | 159 | 5.899  | 11.218 | 0.761  | 1.00 | 25.81 | O   |
| ATOM | 1244 | CB  | LYS | A | 159 | 3.358  | 9.187  | -0.202 | 1.00 | 19.48 | C   |
| ATOM | 1245 | CG  | LYS | A | 159 | 3.096  | 8.664  | -1.584 | 1.00 | 18.68 | C   |
| ATOM | 1246 | CD  | LYS | A | 159 | 4.087  | 7.579  | -1.993 | 1.00 | 19.63 | C   |
| ATOM | 1247 | CE  | LYS | A | 159 | 3.781  | 7.040  | -3.387 | 1.00 | 20.86 | C   |
| ATOM | 1248 | NZ  | LYS | A | 159 | 4.795  | 6.042  | -3.824 | 1.00 | 23.26 | N1+ |
| ATOM | 1249 | N   | ARG | A | 160 | 4.850  | 10.195 | 2.436  | 1.00 | 23.94 | N   |
| ATOM | 1250 | CA  | ARG | A | 160 | 5.123  | 11.255 | 3.413  | 1.00 | 25.27 | C   |
| ATOM | 1251 | C   | ARG | A | 160 | 6.546  | 11.157 | 3.957  | 1.00 | 26.63 | C   |
| ATOM | 1252 | O   | ARG | A | 160 | 6.750  | 11.043 | 5.183  | 1.00 | 23.87 | O   |
| ATOM | 1253 | CB  | ARG | A | 160 | 4.135  | 11.184 | 4.583  | 1.00 | 28.93 | C   |
| ATOM | 1254 | CG  | ARG | A | 160 | 2.655  | 11.179 | 4.194  | 1.00 | 27.51 | C   |
| ATOM | 1255 | CD  | ARG | A | 160 | 2.030  | 12.549 | 4.347  | 1.00 | 25.69 | C   |
| ATOM | 1256 | NE  | ARG | A | 160 | 0.589  | 12.455 | 4.562  | 1.00 | 24.09 | N   |
| ATOM | 1257 | CZ  | ARG | A | 160 | 0.025  | 12.102 | 5.714  | 1.00 | 22.36 | C   |
| ATOM | 1258 | NH1 | ARG | A | 160 | 0.772  | 11.875 | 6.797  | 1.00 | 20.48 | N1+ |
| ATOM | 1259 | NH2 | ARG | A | 160 | -1.292 | 11.998 | 5.786  | 1.00 | 19.93 | N   |
| ATOM | 1260 | N   | TYR | A | 161 | 7.468  | 10.909 | 3.020  | 1.00 | 26.96 | N   |
| ATOM | 1261 | CA  | TYR | A | 161 | 8.917  | 11.151 | 3.154  | 1.00 | 25.36 | C   |
| ATOM | 1262 | C   | TYR | A | 161 | 9.285  | 11.672 | 1.781  | 1.00 | 25.00 | C   |
| ATOM | 1263 | O   | TYR | A | 161 | 9.938  | 12.717 | 1.649  | 1.00 | 26.93 | O   |
| ATOM | 1264 | CB  | TYR | A | 161 | 9.666  | 9.839  | 3.404  | 1.00 | 22.15 | C   |
| ATOM | 1265 | CG  | TYR | A | 161 | 11.146 | 9.948  | 3.736  | 1.00 | 19.16 | C   |
| ATOM | 1266 | CD1 | TYR | A | 161 | 11.649 | 10.985 | 4.526  | 1.00 | 21.34 | C   |
| ATOM | 1267 | CD2 | TYR | A | 161 | 12.035 | 8.967  | 3.311  | 1.00 | 17.23 | C   |
| ATOM | 1268 | CE1 | TYR | A | 161 | 13.021 | 11.033 | 4.875  | 1.00 | 18.50 | C   |
| ATOM | 1269 | CE2 | TYR | A | 161 | 13.376 | 9.007  | 3.641  | 1.00 | 15.97 | C   |
| ATOM | 1270 | CZ  | TYR | A | 161 | 13.870 | 10.035 | 4.411  | 1.00 | 16.75 | C   |
| ATOM | 1271 | OH  | TYR | A | 161 | 15.220 | 10.080 | 4.642  | 1.00 | 14.91 | O   |
| ATOM | 1272 | N   | LYS | A | 162 | 8.684  | 11.030 | 0.776  | 1.00 | 24.44 | N   |
| ATOM | 1273 | CA  | LYS | A | 162 | 8.762  | 11.445 | -0.629 | 1.00 | 20.54 | C   |
| ATOM | 1274 | C   | LYS | A | 162 | 8.217  | 12.847 | -0.779 | 1.00 | 18.06 | C   |
| ATOM | 1275 | O   | LYS | A | 162 | 8.972  | 13.809 | -0.711 | 1.00 | 18.82 | O   |
| ATOM | 1276 | CB  | LYS | A | 162 | 7.963  | 10.477 | -1.508 | 1.00 | 19.05 | C   |
| ATOM | 1277 | CG  | LYS | A | 162 | 8.158  | 10.649 | -3.005 | 1.00 | 18.72 | C   |
| ATOM | 1278 | CD  | LYS | A | 162 | 7.086  | 11.530 | -3.600 | 1.00 | 15.41 | C   |
| ATOM | 1279 | CE  | LYS | A | 162 | 6.906  | 11.243 | -5.053 | 1.00 | 13.03 | C   |
| ATOM | 1280 | NZ  | LYS | A | 162 | 6.676  | 9.809  | -5.269 | 1.00 | 14.01 | N1+ |
| ATOM | 1281 | N   | ALA | A | 163 | 6.893  | 12.947 | -0.846 | 1.00 | 17.36 | N   |
| ATOM | 1282 | CA  | ALA | A | 163 | 6.153  | 14.205 | -0.954 | 1.00 | 17.24 | C   |
| ATOM | 1283 | C   | ALA | A | 163 | 6.795  | 15.380 | -0.258 | 1.00 | 17.12 | C   |
| ATOM | 1284 | O   | ALA | A | 163 | 6.690  | 16.493 | -0.748 | 1.00 | 19.51 | O   |
| ATOM | 1285 | CB  | ALA | A | 163 | 4.736  | 14.030 | -0.439 | 1.00 | 14.73 | C   |
| ATOM | 1286 | N   | ALA | A | 164 | 7.419  | 15.144 | 0.894  | 1.00 | 16.39 | N   |
| ATOM | 1287 | CA  | ALA | A | 164 | 8.122  | 16.201 | 1.603  | 1.00 | 17.36 | C   |
| ATOM | 1288 | C   | ALA | A | 164 | 9.253  | 16.693 | 0.709  | 1.00 | 19.77 | C   |
| ATOM | 1289 | O   | ALA | A | 164 | 9.142  | 17.759 | 0.114  | 1.00 | 20.30 | O   |
| ATOM | 1290 | CB  | ALA | A | 164 | 8.670  | 15.686 | 2.930  | 1.00 | 15.34 | C   |
| ATOM | 1291 | N   | PHE | A | 165 | 10.238 | 15.827 | 0.466  | 1.00 | 21.94 | N   |
| ATOM | 1292 | CA  | PHE | A | 165 | 11.379 | 16.135 | -0.393 | 1.00 | 20.00 | C   |
| ATOM | 1293 | C   | PHE | A | 165 | 10.864 | 16.794 | -1.664 | 1.00 | 19.97 | C   |
| ATOM | 1294 | O   | PHE | A | 165 | 11.217 | 17.951 | -1.933 | 1.00 | 19.72 | O   |
| ATOM | 1295 | CB  | PHE | A | 165 | 12.108 | 14.842 | -0.765 | 1.00 | 24.10 | C   |
| ATOM | 1296 | CG  | PHE | A | 165 | 13.261 | 14.491 | 0.139  | 1.00 | 26.13 | C   |
| ATOM | 1297 | CD1 | PHE | A | 165 | 13.084 | 14.331 | 1.495  | 1.00 | 26.42 | C   |
| ATOM | 1298 | CD2 | PHE | A | 165 | 14.505 | 14.200 | -0.396 | 1.00 | 27.17 | C   |
| ATOM | 1299 | CE1 | PHE | A | 165 | 14.128 | 13.891 | 2.287  | 1.00 | 24.89 | C   |
| ATOM | 1300 | CE2 | PHE | A | 165 | 15.536 | 13.758 | 0.397  | 1.00 | 22.89 | C   |
| ATOM | 1301 | CZ  | PHE | A | 165 | 15.350 | 13.609 | 1.730  | 1.00 | 22.00 | C   |

|      |      |     |     |   |     |        |        |        |      |       |     |
|------|------|-----|-----|---|-----|--------|--------|--------|------|-------|-----|
| ATOM | 1302 | N   | THR | A | 166 | 9.807  | 16.176 | -2.209 | 1.00 | 18.51 | N   |
| ATOM | 1303 | CA  | THR | A | 166 | 9.151  | 16.502 | -3.488 | 1.00 | 17.70 | C   |
| ATOM | 1304 | C   | THR | A | 166 | 8.432  | 17.857 | -3.457 | 1.00 | 20.02 | C   |
| ATOM | 1305 | O   | THR | A | 166 | 7.358  | 18.038 | -4.048 | 1.00 | 21.09 | O   |
| ATOM | 1306 | CB  | THR | A | 166 | 8.105  | 15.409 | -3.838 | 1.00 | 18.48 | C   |
| ATOM | 1307 | CG2 | THR | A | 166 | 7.511  | 15.601 | -5.242 | 1.00 | 15.89 | C   |
| ATOM | 1308 | OG1 | THR | A | 166 | 8.715  | 14.114 | -3.735 | 1.00 | 18.39 | O   |
| ATOM | 1309 | N   | GLU | A | 167 | 8.978  | 18.778 | -2.677 | 1.00 | 20.35 | N   |
| ATOM | 1310 | CA  | GLU | A | 167 | 8.511  | 20.145 | -2.670 | 1.00 | 20.28 | C   |
| ATOM | 1311 | C   | GLU | A | 167 | 9.603  | 21.010 | -2.066 | 1.00 | 18.79 | C   |
| ATOM | 1312 | O   | GLU | A | 167 | 10.110 | 21.924 | -2.699 | 1.00 | 19.11 | O   |
| ATOM | 1313 | CB  | GLU | A | 167 | 7.243  | 20.228 | -1.846 | 1.00 | 20.88 | C   |
| ATOM | 1314 | CG  | GLU | A | 167 | 6.759  | 21.612 | -1.587 | 1.00 | 26.70 | C   |
| ATOM | 1315 | CD  | GLU | A | 167 | 5.856  | 21.656 | -0.377 | 1.00 | 29.94 | C   |
| ATOM | 1316 | OE1 | GLU | A | 167 | 4.740  | 21.074 | -0.432 | 1.00 | 32.74 | O   |
| ATOM | 1317 | OE2 | GLU | A | 167 | 6.300  | 22.200 | 0.658  | 1.00 | 32.31 | O1- |
| ATOM | 1318 | N   | CYS | A | 168 | 10.066 | 20.636 | -0.895 | 1.00 | 19.65 | N   |
| ATOM | 1319 | CA  | CYS | A | 168 | 10.978 | 21.490 | -0.205 | 1.00 | 22.23 | C   |
| ATOM | 1320 | C   | CYS | A | 168 | 12.291 | 20.781 | -0.033 | 1.00 | 25.31 | C   |
| ATOM | 1321 | O   | CYS | A | 168 | 12.626 | 20.370 | 1.077  | 1.00 | 29.59 | O   |
| ATOM | 1322 | CB  | CYS | A | 168 | 10.395 | 21.919 | 1.147  | 1.00 | 22.76 | C   |
| ATOM | 1323 | SG  | CYS | A | 168 | 11.603 | 22.432 | 2.429  | 1.00 | 26.02 | S   |
| ATOM | 1324 | N   | CYS | A | 169 | 13.009 | 20.566 | -1.136 | 1.00 | 24.80 | N   |
| ATOM | 1325 | CA  | CYS | A | 169 | 14.459 | 20.798 | -1.101 | 1.00 | 27.27 | C   |
| ATOM | 1326 | C   | CYS | A | 169 | 14.569 | 22.293 | -1.412 | 1.00 | 26.49 | C   |
| ATOM | 1327 | O   | CYS | A | 169 | 15.379 | 23.015 | -0.802 | 1.00 | 26.20 | O   |
| ATOM | 1328 | CB  | CYS | A | 169 | 15.190 | 19.988 | -2.194 | 1.00 | 30.98 | C   |
| ATOM | 1329 | SG  | CYS | A | 169 | 15.841 | 18.333 | -1.718 | 1.00 | 33.25 | S   |
| ATOM | 1330 | N   | GLN | A | 170 | 13.492 | 22.748 | -2.059 | 1.00 | 26.22 | N   |
| ATOM | 1331 | CA  | GLN | A | 170 | 13.353 | 23.983 | -2.844 | 1.00 | 25.86 | C   |
| ATOM | 1332 | C   | GLN | A | 170 | 13.998 | 25.203 | -2.207 | 1.00 | 26.18 | C   |
| ATOM | 1333 | O   | GLN | A | 170 | 15.202 | 25.251 | -2.033 | 1.00 | 30.02 | O   |
| ATOM | 1334 | CB  | GLN | A | 170 | 11.842 | 24.269 | -3.085 | 1.00 | 25.67 | C   |
| ATOM | 1335 | CG  | GLN | A | 170 | 11.397 | 24.518 | -4.531 | 1.00 | 21.68 | C   |
| ATOM | 1336 | CD  | GLN | A | 170 | 11.373 | 23.257 | -5.393 | 1.00 | 20.70 | C   |
| ATOM | 1337 | NE2 | GLN | A | 170 | 12.540 | 22.814 | -5.816 | 1.00 | 20.61 | N   |
| ATOM | 1338 | OE1 | GLN | A | 170 | 10.321 | 22.737 | -5.727 | 1.00 | 16.98 | O   |
| ATOM | 1339 | N   | ALA | A | 171 | 13.192 | 26.161 | -1.785 | 1.00 | 25.17 | N   |
| ATOM | 1340 | CA  | ALA | A | 171 | 13.718 | 27.493 | -1.587 | 1.00 | 22.37 | C   |
| ATOM | 1341 | C   | ALA | A | 171 | 14.440 | 27.547 | -0.279 | 1.00 | 23.13 | C   |
| ATOM | 1342 | O   | ALA | A | 171 | 15.176 | 28.489 | -0.017 | 1.00 | 25.63 | O   |
| ATOM | 1343 | CB  | ALA | A | 171 | 12.619 | 28.501 | -1.608 | 1.00 | 24.39 | C   |
| ATOM | 1344 | N   | ALA | A | 172 | 14.170 | 26.578 | 0.583  | 1.00 | 22.80 | N   |
| ATOM | 1345 | CA  | ALA | A | 172 | 14.686 | 26.649 | 1.935  | 1.00 | 23.27 | C   |
| ATOM | 1346 | C   | ALA | A | 172 | 15.967 | 25.845 | 2.129  | 1.00 | 23.80 | C   |
| ATOM | 1347 | O   | ALA | A | 172 | 16.315 | 25.519 | 3.270  | 1.00 | 21.53 | O   |
| ATOM | 1348 | CB  | ALA | A | 172 | 13.634 | 26.207 | 2.915  | 1.00 | 21.51 | C   |
| ATOM | 1349 | N   | ASP | A | 173 | 16.684 | 25.569 | 1.031  | 1.00 | 25.42 | N   |
| ATOM | 1350 | CA  | ASP | A | 173 | 17.901 | 24.751 | 1.088  | 1.00 | 28.45 | C   |
| ATOM | 1351 | C   | ASP | A | 173 | 17.612 | 23.425 | 1.779  | 1.00 | 30.18 | C   |
| ATOM | 1352 | O   | ASP | A | 173 | 18.403 | 22.987 | 2.608  | 1.00 | 31.67 | O   |
| ATOM | 1353 | CB  | ASP | A | 173 | 18.973 | 25.462 | 1.906  | 1.00 | 29.65 | C   |
| ATOM | 1354 | CG  | ASP | A | 173 | 19.953 | 26.208 | 1.057  | 1.00 | 30.99 | C   |
| ATOM | 1355 | OD1 | ASP | A | 173 | 19.492 | 27.029 | 0.227  | 1.00 | 32.55 | O   |
| ATOM | 1356 | OD2 | ASP | A | 173 | 21.176 | 25.999 | 1.265  | 1.00 | 32.46 | O1- |
| ATOM | 1357 | N   | LYS | A | 174 | 16.377 | 22.957 | 1.652  | 1.00 | 30.45 | N   |
| ATOM | 1358 | CA  | LYS | A | 174 | 15.795 | 21.965 | 2.549  | 1.00 | 29.08 | C   |
| ATOM | 1359 | C   | LYS | A | 174 | 15.766 | 22.368 | 4.036  | 1.00 | 28.75 | C   |
| ATOM | 1360 | O   | LYS | A | 174 | 15.050 | 21.761 | 4.840  | 1.00 | 29.82 | O   |
| ATOM | 1361 | CB  | LYS | A | 174 | 16.501 | 20.618 | 2.369  | 1.00 | 29.28 | C   |
| ATOM | 1362 | CG  | LYS | A | 174 | 17.744 | 20.415 | 3.213  | 1.00 | 28.90 | C   |
| ATOM | 1363 | CD  | LYS | A | 174 | 17.508 | 19.425 | 4.326  | 1.00 | 28.34 | C   |
| ATOM | 1364 | CE  | LYS | A | 174 | 18.696 | 19.385 | 5.263  | 1.00 | 28.62 | C   |
| ATOM | 1365 | NZ  | LYS | A | 174 | 19.405 | 18.085 | 5.065  | 1.00 | 31.78 | N1+ |
| ATOM | 1366 | N   | ALA | A | 175 | 16.507 | 23.402 | 4.401  | 1.00 | 26.56 | N   |
| ATOM | 1367 | CA  | ALA | A | 175 | 16.781 | 23.678 | 5.795  | 1.00 | 27.02 | C   |
| ATOM | 1368 | C   | ALA | A | 175 | 15.532 | 23.529 | 6.661  | 1.00 | 27.16 | C   |
| ATOM | 1369 | O   | ALA | A | 175 | 15.266 | 22.457 | 7.181  | 1.00 | 27.67 | O   |
| ATOM | 1370 | CB  | ALA | A | 175 | 17.359 | 25.092 | 5.929  | 1.00 | 29.25 | C   |
| ATOM | 1371 | N   | ALA | A | 176 | 14.672 | 24.542 | 6.602  | 1.00 | 26.48 | N   |
| ATOM | 1372 | CA  | ALA | A | 176 | 13.614 | 24.748 | 7.567  | 1.00 | 20.96 | C   |

|      |      |     |     |   |     |        |        |        |      |       |     |
|------|------|-----|-----|---|-----|--------|--------|--------|------|-------|-----|
| ATOM | 1373 | C   | ALA | A | 176 | 12.325 | 24.254 | 6.976  | 1.00 | 21.35 | C   |
| ATOM | 1374 | O   | ALA | A | 176 | 11.676 | 23.432 | 7.557  | 1.00 | 22.19 | O   |
| ATOM | 1375 | CB  | ALA | A | 176 | 13.506 | 26.217 | 7.899  | 1.00 | 20.23 | C   |
| ATOM | 1376 | N   | CYS | A | 177 | 11.973 | 24.711 | 5.784  | 1.00 | 22.81 | N   |
| ATOM | 1377 | CA  | CYS | A | 177 | 10.706 | 24.305 | 5.168  | 1.00 | 25.45 | C   |
| ATOM | 1378 | C   | CYS | A | 177 | 10.548 | 22.808 | 4.974  | 1.00 | 25.72 | C   |
| ATOM | 1379 | O   | CYS | A | 177 | 9.532  | 22.387 | 4.413  | 1.00 | 25.67 | O   |
| ATOM | 1380 | CB  | CYS | A | 177 | 10.498 | 24.980 | 3.800  | 1.00 | 28.47 | C   |
| ATOM | 1381 | SG  | CYS | A | 177 | 11.590 | 24.464 | 2.414  | 1.00 | 27.41 | S   |
| ATOM | 1382 | N   | LEU | A | 178 | 11.645 | 22.068 | 5.169  | 1.00 | 25.62 | N   |
| ATOM | 1383 | CA  | LEU | A | 178 | 11.655 | 20.608 | 5.049  | 1.00 | 25.90 | C   |
| ATOM | 1384 | C   | LEU | A | 178 | 11.677 | 19.970 | 6.433  | 1.00 | 27.85 | C   |
| ATOM | 1385 | O   | LEU | A | 178 | 10.620 | 19.599 | 6.972  | 1.00 | 31.37 | O   |
| ATOM | 1386 | CB  | LEU | A | 178 | 12.880 | 20.117 | 4.255  | 1.00 | 23.18 | C   |
| ATOM | 1387 | CG  | LEU | A | 178 | 12.918 | 18.765 | 3.515  | 1.00 | 22.71 | C   |
| ATOM | 1388 | CD1 | LEU | A | 178 | 14.366 | 18.315 | 3.373  | 1.00 | 15.42 | C   |
| ATOM | 1389 | CD2 | LEU | A | 178 | 12.073 | 17.684 | 4.217  | 1.00 | 19.52 | C   |
| ATOM | 1390 | N   | LEU | A | 179 | 12.858 | 19.897 | 7.046  | 1.00 | 24.44 | N   |
| ATOM | 1391 | CA  | LEU | A | 179 | 13.079 | 18.960 | 8.143  | 1.00 | 23.00 | C   |
| ATOM | 1392 | C   | LEU | A | 179 | 12.215 | 19.038 | 9.449  | 1.00 | 23.84 | C   |
| ATOM | 1393 | O   | LEU | A | 179 | 12.326 | 18.165 | 10.315 | 1.00 | 22.67 | O   |
| ATOM | 1394 | CB  | LEU | A | 179 | 14.588 | 18.940 | 8.460  | 1.00 | 21.35 | C   |
| ATOM | 1395 | CG  | LEU | A | 179 | 15.248 | 19.579 | 9.697  | 1.00 | 23.42 | C   |
| ATOM | 1396 | CD1 | LEU | A | 179 | 16.763 | 19.387 | 9.589  | 1.00 | 22.06 | C   |
| ATOM | 1397 | CD2 | LEU | A | 179 | 14.898 | 21.062 | 9.845  | 1.00 | 18.81 | C   |
| ATOM | 1398 | N   | PRO | A | 180 | 11.301 | 20.026 | 9.578  | 1.00 | 24.90 | N   |
| ATOM | 1399 | CA  | PRO | A | 180 | 10.275 | 19.957 | 10.637 | 1.00 | 25.32 | C   |
| ATOM | 1400 | C   | PRO | A | 180 | 9.020  | 19.164 | 10.271 | 1.00 | 25.47 | C   |
| ATOM | 1401 | O   | PRO | A | 180 | 8.078  | 19.034 | 11.074 | 1.00 | 24.17 | O   |
| ATOM | 1402 | CB  | PRO | A | 180 | 9.956  | 21.425 | 10.914 | 1.00 | 25.04 | C   |
| ATOM | 1403 | CG  | PRO | A | 180 | 10.217 | 22.072 | 9.597  | 1.00 | 22.93 | C   |
| ATOM | 1404 | CD  | PRO | A | 180 | 11.523 | 21.427 | 9.210  | 1.00 | 24.99 | C   |
| ATOM | 1405 | N   | LYS | A | 181 | 9.018  | 18.641 | 9.054  | 1.00 | 24.23 | N   |
| ATOM | 1406 | CA  | LYS | A | 181 | 8.168  | 17.507 | 8.701  | 1.00 | 23.92 | C   |
| ATOM | 1407 | C   | LYS | A | 181 | 9.027  | 16.222 | 8.798  | 1.00 | 22.82 | C   |
| ATOM | 1408 | O   | LYS | A | 181 | 8.584  | 15.135 | 8.454  | 1.00 | 20.58 | O   |
| ATOM | 1409 | CB  | LYS | A | 181 | 7.615  | 17.711 | 7.286  | 1.00 | 25.23 | C   |
| ATOM | 1410 | CG  | LYS | A | 181 | 7.840  | 19.139 | 6.771  | 1.00 | 23.39 | C   |
| ATOM | 1411 | CD  | LYS | A | 181 | 7.528  | 19.289 | 5.312  | 1.00 | 21.94 | C   |
| ATOM | 1412 | CE  | LYS | A | 181 | 6.048  | 19.541 | 5.120  | 1.00 | 22.34 | C   |
| ATOM | 1413 | NZ  | LYS | A | 181 | 5.471  | 20.266 | 6.296  | 1.00 | 24.22 | N1+ |
| ATOM | 1414 | N   | LEU | A | 182 | 10.231 | 16.372 | 9.354  | 1.00 | 21.40 | N   |
| ATOM | 1415 | CA  | LEU | A | 182 | 11.159 | 15.277 | 9.612  | 1.00 | 18.92 | C   |
| ATOM | 1416 | C   | LEU | A | 182 | 11.513 | 15.303 | 11.107 | 1.00 | 18.56 | C   |
| ATOM | 1417 | O   | LEU | A | 182 | 12.482 | 14.685 | 11.539 | 1.00 | 16.25 | O   |
| ATOM | 1418 | CB  | LEU | A | 182 | 12.431 | 15.475 | 8.777  | 1.00 | 19.22 | C   |
| ATOM | 1419 | CG  | LEU | A | 182 | 12.869 | 14.556 | 7.621  | 1.00 | 20.67 | C   |
| ATOM | 1420 | CD1 | LEU | A | 182 | 12.740 | 13.115 | 8.064  | 1.00 | 22.41 | C   |
| ATOM | 1421 | CD2 | LEU | A | 182 | 12.070 | 14.796 | 6.342  | 1.00 | 16.92 | C   |
| ATOM | 1422 | N   | ASP | A | 183 | 10.857 | 16.186 | 11.849 | 1.00 | 19.20 | N   |
| ATOM | 1423 | CA  | ASP | A | 183 | 10.839 | 16.085 | 13.305 | 1.00 | 21.07 | C   |
| ATOM | 1424 | C   | ASP | A | 183 | 9.608  | 15.238 | 13.640 | 1.00 | 21.27 | C   |
| ATOM | 1425 | O   | ASP | A | 183 | 9.693  | 14.015 | 13.759 | 1.00 | 20.65 | O   |
| ATOM | 1426 | CB  | ASP | A | 183 | 10.731 | 17.485 | 13.960 | 1.00 | 22.49 | C   |
| ATOM | 1427 | CG  | ASP | A | 183 | 12.064 | 18.279 | 13.924 | 1.00 | 24.78 | C   |
| ATOM | 1428 | OD1 | ASP | A | 183 | 12.922 | 18.040 | 14.805 | 1.00 | 22.96 | O   |
| ATOM | 1429 | OD2 | ASP | A | 183 | 12.261 | 19.129 | 13.018 | 1.00 | 24.01 | O1- |
| ATOM | 1430 | N   | GLU | A | 184 | 8.443  | 15.856 | 13.510 | 1.00 | 20.83 | N   |
| ATOM | 1431 | CA  | GLU | A | 184 | 7.190  | 15.210 | 13.853 | 1.00 | 20.58 | C   |
| ATOM | 1432 | C   | GLU | A | 184 | 7.081  | 13.767 | 13.329 | 1.00 | 19.58 | C   |
| ATOM | 1433 | O   | GLU | A | 184 | 7.119  | 12.822 | 14.118 | 1.00 | 18.60 | O   |
| ATOM | 1434 | CB  | GLU | A | 184 | 6.021  | 16.067 | 13.356 | 1.00 | 21.76 | C   |
| ATOM | 1435 | CG  | GLU | A | 184 | 4.698  | 15.723 | 13.997 | 1.00 | 25.58 | C   |
| ATOM | 1436 | CD  | GLU | A | 184 | 3.531  | 15.959 | 13.071 | 1.00 | 27.71 | C   |
| ATOM | 1437 | OE1 | GLU | A | 184 | 3.257  | 17.145 | 12.760 | 1.00 | 26.41 | O   |
| ATOM | 1438 | OE2 | GLU | A | 184 | 2.892  | 14.954 | 12.659 | 1.00 | 29.24 | O1- |
| ATOM | 1439 | N   | LEU | A | 185 | 7.114  | 13.580 | 12.015 | 1.00 | 19.28 | N   |
| ATOM | 1440 | CA  | LEU | A | 185 | 6.872  | 12.254 | 11.438 | 1.00 | 21.28 | C   |
| ATOM | 1441 | C   | LEU | A | 185 | 8.027  | 11.229 | 11.664 | 1.00 | 21.48 | C   |
| ATOM | 1442 | O   | LEU | A | 185 | 8.321  | 10.422 | 10.797 | 1.00 | 20.44 | O   |
| ATOM | 1443 | CB  | LEU | A | 185 | 6.549  | 12.387 | 9.930  | 1.00 | 21.87 | C   |

|      |      |     |     |   |     |        |        |        |      |       |     |
|------|------|-----|-----|---|-----|--------|--------|--------|------|-------|-----|
| ATOM | 1444 | CG  | LEU | A | 185 | 5.217  | 13.009 | 9.440  | 1.00 | 24.75 | C   |
| ATOM | 1445 | CD1 | LEU | A | 185 | 5.400  | 14.429 | 8.858  | 1.00 | 21.49 | C   |
| ATOM | 1446 | CD2 | LEU | A | 185 | 4.605  | 12.100 | 8.376  | 1.00 | 22.23 | C   |
| ATOM | 1447 | N   | ARG | A | 186 | 8.728  | 11.323 | 12.789 | 1.00 | 21.60 | N   |
| ATOM | 1448 | CA  | ARG | A | 186 | 9.692  | 10.304 | 13.191 | 1.00 | 20.65 | C   |
| ATOM | 1449 | C   | ARG | A | 186 | 9.175  | 9.608  | 14.448 | 1.00 | 23.63 | C   |
| ATOM | 1450 | O   | ARG | A | 186 | 9.353  | 8.393  | 14.626 | 1.00 | 24.05 | O   |
| ATOM | 1451 | CB  | ARG | A | 186 | 11.036 | 10.941 | 13.514 | 1.00 | 21.81 | C   |
| ATOM | 1452 | CG  | ARG | A | 186 | 11.149 | 11.524 | 14.926 | 1.00 | 20.40 | C   |
| ATOM | 1453 | CD  | ARG | A | 186 | 12.527 | 11.273 | 15.525 | 1.00 | 22.73 | C   |
| ATOM | 1454 | NE  | ARG | A | 186 | 12.739 | 9.855  | 15.758 | 1.00 | 24.25 | N   |
| ATOM | 1455 | CZ  | ARG | A | 186 | 13.468 | 9.358  | 16.750 | 1.00 | 26.77 | C   |
| ATOM | 1456 | NH1 | ARG | A | 186 | 14.043 | 10.164 | 17.638 | 1.00 | 26.94 | N1+ |
| ATOM | 1457 | NH2 | ARG | A | 186 | 13.561 | 8.042  | 16.896 | 1.00 | 28.22 | N   |
| ATOM | 1458 | N   | ASP | A | 187 | 8.589  | 10.399 | 15.349 | 1.00 | 23.17 | N   |
| ATOM | 1459 | CA  | ASP | A | 187 | 7.844  | 9.858  | 16.463 | 1.00 | 20.77 | C   |
| ATOM | 1460 | C   | ASP | A | 187 | 6.644  | 9.094  | 15.937 | 1.00 | 18.87 | C   |
| ATOM | 1461 | O   | ASP | A | 187 | 6.412  | 7.993  | 16.382 | 1.00 | 18.84 | O   |
| ATOM | 1462 | CB  | ASP | A | 187 | 7.385  | 10.972 | 17.388 | 1.00 | 23.77 | C   |
| ATOM | 1463 | CG  | ASP | A | 187 | 8.523  | 11.556 | 18.208 | 1.00 | 26.43 | C   |
| ATOM | 1464 | OD1 | ASP | A | 187 | 8.918  | 10.937 | 19.241 | 1.00 | 27.86 | O   |
| ATOM | 1465 | OD2 | ASP | A | 187 | 8.981  | 12.669 | 17.847 | 1.00 | 26.15 | O1- |
| ATOM | 1466 | N   | GLU | A | 188 | 6.000  | 9.594  | 14.880 | 1.00 | 18.08 | N   |
| ATOM | 1467 | CA  | GLU | A | 188 | 4.861  | 8.894  | 14.247 | 1.00 | 18.47 | C   |
| ATOM | 1468 | C   | GLU | A | 188 | 5.280  | 7.641  | 13.475 | 1.00 | 18.83 | C   |
| ATOM | 1469 | O   | GLU | A | 188 | 4.440  | 6.970  | 12.890 | 1.00 | 18.98 | O   |
| ATOM | 1470 | CB  | GLU | A | 188 | 4.074  | 9.840  | 13.299 | 1.00 | 16.29 | C   |
| ATOM | 1471 | CG  | GLU | A | 188 | 2.648  | 9.362  | 12.934 | 1.00 | 12.67 | C   |
| ATOM | 1472 | CD  | GLU | A | 188 | 1.770  | 10.425 | 12.231 | 1.00 | 16.08 | C   |
| ATOM | 1473 | OE1 | GLU | A | 188 | 2.195  | 11.591 | 12.086 | 1.00 | 16.21 | O   |
| ATOM | 1474 | OE2 | GLU | A | 188 | 0.607  | 10.109 | 11.882 | 1.00 | 14.17 | O1- |
| ATOM | 1475 | N   | GLY | A | 189 | 6.587  | 7.418  | 13.355 | 1.00 | 20.49 | N   |
| ATOM | 1476 | CA  | GLY | A | 189 | 7.098  | 6.195  | 12.753 | 1.00 | 19.35 | C   |
| ATOM | 1477 | C   | GLY | A | 189 | 7.221  | 5.173  | 13.857 | 1.00 | 18.26 | C   |
| ATOM | 1478 | O   | GLY | A | 189 | 6.532  | 4.161  | 13.867 | 1.00 | 18.56 | O   |
| ATOM | 1479 | N   | LYS | A | 190 | 7.964  | 5.536  | 14.886 | 1.00 | 20.08 | N   |
| ATOM | 1480 | CA  | LYS | A | 190 | 7.903  | 4.816  | 16.152 | 1.00 | 22.77 | C   |
| ATOM | 1481 | C   | LYS | A | 190 | 6.463  | 4.574  | 16.647 | 1.00 | 22.46 | C   |
| ATOM | 1482 | O   | LYS | A | 190 | 6.120  | 3.434  | 16.940 | 1.00 | 24.59 | O   |
| ATOM | 1483 | CB  | LYS | A | 190 | 8.710  | 5.555  | 17.232 | 1.00 | 24.21 | C   |
| ATOM | 1484 | CG  | LYS | A | 190 | 10.186 | 5.699  | 16.889 | 1.00 | 27.27 | C   |
| ATOM | 1485 | CD  | LYS | A | 190 | 11.034 | 5.974  | 18.115 | 1.00 | 31.27 | C   |
| ATOM | 1486 | CE  | LYS | A | 190 | 10.959 | 7.431  | 18.550 | 1.00 | 32.12 | C   |
| ATOM | 1487 | NZ  | LYS | A | 190 | 12.010 | 7.723  | 19.570 | 1.00 | 31.95 | N1+ |
| ATOM | 1488 | N   | ALA | A | 191 | 5.594  | 5.589  | 16.605 | 1.00 | 20.34 | N   |
| ATOM | 1489 | CA  | ALA | A | 191 | 4.280  | 5.495  | 17.239 | 1.00 | 17.99 | C   |
| ATOM | 1490 | C   | ALA | A | 191 | 3.575  | 4.269  | 16.726 | 1.00 | 17.52 | C   |
| ATOM | 1491 | O   | ALA | A | 191 | 3.591  | 3.250  | 17.391 | 1.00 | 21.21 | O   |
| ATOM | 1492 | CB  | ALA | A | 191 | 3.442  | 6.712  | 16.971 | 1.00 | 17.43 | C   |
| ATOM | 1493 | N   | SER | A | 192 | 3.200  | 4.269  | 15.458 | 1.00 | 16.48 | N   |
| ATOM | 1494 | CA  | SER | A | 192 | 2.445  | 3.151  | 14.932 | 1.00 | 15.33 | C   |
| ATOM | 1495 | C   | SER | A | 192 | 3.246  | 1.855  | 14.918 | 1.00 | 17.13 | C   |
| ATOM | 1496 | O   | SER | A | 192 | 2.673  | 0.771  | 15.078 | 1.00 | 18.89 | O   |
| ATOM | 1497 | CB  | SER | A | 192 | 1.943  | 3.446  | 13.538 | 1.00 | 14.90 | C   |
| ATOM | 1498 | OG  | SER | A | 192 | 1.128  | 2.380  | 13.116 | 1.00 | 19.59 | O   |
| ATOM | 1499 | N   | SER | A | 193 | 4.567  | 1.946  | 14.777 | 1.00 | 13.75 | N   |
| ATOM | 1500 | CA  | SER | A | 193 | 5.377  | 0.738  | 14.665 | 1.00 | 11.93 | C   |
| ATOM | 1501 | C   | SER | A | 193 | 5.408  | 0.064  | 15.996 | 1.00 | 10.26 | C   |
| ATOM | 1502 | O   | SER | A | 193 | 6.136  | -0.909 | 16.173 | 1.00 | 8.48  | O   |
| ATOM | 1503 | CB  | SER | A | 193 | 6.802  | 1.089  | 14.258 | 1.00 | 15.39 | C   |
| ATOM | 1504 | OG  | SER | A | 193 | 7.526  | 1.680  | 15.322 | 1.00 | 15.80 | O   |
| ATOM | 1505 | N   | ALA | A | 194 | 4.916  | 0.833  | 16.965 | 1.00 | 13.13 | N   |
| ATOM | 1506 | CA  | ALA | A | 194 | 4.875  | 0.494  | 18.384 | 1.00 | 14.96 | C   |
| ATOM | 1507 | C   | ALA | A | 194 | 3.436  | 0.431  | 18.859 | 1.00 | 12.28 | C   |
| ATOM | 1508 | O   | ALA | A | 194 | 3.117  | -0.360 | 19.733 | 1.00 | 16.44 | O   |
| ATOM | 1509 | CB  | ALA | A | 194 | 5.647  | 1.543  | 19.205 | 1.00 | 14.37 | C   |
| ATOM | 1510 | N   | LYS | A | 195 | 2.560  | 1.162  | 18.186 | 1.00 | 8.87  | N   |
| ATOM | 1511 | CA  | LYS | A | 195 | 1.129  | 1.081  | 18.415 | 1.00 | 10.05 | C   |
| ATOM | 1512 | C   | LYS | A | 195 | 0.656  | -0.181 | 17.755 | 1.00 | 9.99  | C   |
| ATOM | 1513 | O   | LYS | A | 195 | -0.535 | -0.421 | 17.682 | 1.00 | 12.22 | O   |
| ATOM | 1514 | CB  | LYS | A | 195 | 0.390  | 2.267  | 17.767 | 1.00 | 12.99 | C   |

|      |      |     |     |   |     |        |         |        |      |       |     |
|------|------|-----|-----|---|-----|--------|---------|--------|------|-------|-----|
| ATOM | 1515 | CG  | LYS | A | 195 | 0.478  | 3.588   | 18.531 | 1.00 | 15.37 | C   |
| ATOM | 1516 | CD  | LYS | A | 195 | 0.179  | 4.787   | 17.664 | 1.00 | 16.04 | C   |
| ATOM | 1517 | CE  | LYS | A | 195 | -1.184 | 5.396   | 17.995 | 1.00 | 19.24 | C   |
| ATOM | 1518 | NZ  | LYS | A | 195 | -1.397 | 6.691   | 17.246 | 1.00 | 20.94 | N1+ |
| ATOM | 1519 | N   | GLN | A | 196 | 1.586  | -0.882  | 17.112 | 1.00 | 13.42 | N   |
| ATOM | 1520 | CA  | GLN | A | 196 | 1.302  | -2.120  | 16.370 | 1.00 | 13.91 | C   |
| ATOM | 1521 | C   | GLN | A | 196 | 1.790  | -3.377  | 17.084 | 1.00 | 13.37 | C   |
| ATOM | 1522 | O   | GLN | A | 196 | 0.998  | -4.282  | 17.270 | 1.00 | 15.65 | O   |
| ATOM | 1523 | CB  | GLN | A | 196 | 1.923  | -2.071  | 14.971 | 1.00 | 13.77 | C   |
| ATOM | 1524 | CG  | GLN | A | 196 | 1.763  | -3.343  | 14.183 | 1.00 | 15.75 | C   |
| ATOM | 1525 | CD  | GLN | A | 196 | 0.630  | -3.266  | 13.192 | 1.00 | 20.39 | C   |
| ATOM | 1526 | NE2 | GLN | A | 196 | -0.021 | -2.104  | 13.132 | 1.00 | 21.97 | N   |
| ATOM | 1527 | OE1 | GLN | A | 196 | 0.344  | -4.228  | 12.470 | 1.00 | 19.31 | O   |
| ATOM | 1528 | N   | ARG | A | 197 | 3.063  | -3.437  | 17.495 | 1.00 | 10.81 | N   |
| ATOM | 1529 | CA  | ARG | A | 197 | 3.666  | -4.683  | 17.989 | 1.00 | 10.56 | C   |
| ATOM | 1530 | C   | ARG | A | 197 | 2.685  | -5.310  | 18.950 | 1.00 | 12.83 | C   |
| ATOM | 1531 | O   | ARG | A | 197 | 2.476  | -6.508  | 18.910 | 1.00 | 14.23 | O   |
| ATOM | 1532 | CB  | ARG | A | 197 | 5.014  | -4.404  | 18.679 | 1.00 | 11.17 | C   |
| ATOM | 1533 | CG  | ARG | A | 197 | 5.808  | -5.620  | 19.258 | 1.00 | 11.07 | C   |
| ATOM | 1534 | CD  | ARG | A | 197 | 5.853  | -6.866  | 18.353 | 1.00 | 8.47  | C   |
| ATOM | 1535 | NE  | ARG | A | 197 | 6.520  | -8.013  | 18.986 | 1.00 | 6.63  | N   |
| ATOM | 1536 | CZ  | ARG | A | 197 | 5.931  | -9.185  | 19.260 | 1.00 | 8.70  | C   |
| ATOM | 1537 | NH1 | ARG | A | 197 | 4.618  | -9.319  | 19.201 | 1.00 | 7.16  | N1+ |
| ATOM | 1538 | NH2 | ARG | A | 197 | 6.645  | -10.211 | 19.706 | 1.00 | 7.19  | N   |
| ATOM | 1539 | N   | LEU | A | 198 | 1.906  | -4.441  | 19.595 | 1.00 | 14.31 | N   |
| ATOM | 1540 | CA  | LEU | A | 198 | 0.664  | -4.783  | 20.286 | 1.00 | 15.62 | C   |
| ATOM | 1541 | C   | LEU | A | 198 | -0.305 | -5.651  | 19.460 | 1.00 | 18.97 | C   |
| ATOM | 1542 | O   | LEU | A | 198 | -0.561 | -6.800  | 19.835 | 1.00 | 22.05 | O   |
| ATOM | 1543 | CB  | LEU | A | 198 | -0.047 | -3.501  | 20.714 | 1.00 | 12.42 | C   |
| ATOM | 1544 | CG  | LEU | A | 198 | -0.455 | -3.324  | 22.174 | 1.00 | 13.86 | C   |
| ATOM | 1545 | CD1 | LEU | A | 198 | -1.936 | -2.970  | 22.232 | 1.00 | 13.35 | C   |
| ATOM | 1546 | CD2 | LEU | A | 198 | -0.162 | -4.573  | 22.987 | 1.00 | 10.76 | C   |
| ATOM | 1547 | N   | LYS | A | 199 | -0.925 | -5.076  | 18.423 | 1.00 | 18.33 | N   |
| ATOM | 1548 | CA  | LYS | A | 199 | -1.898 | -5.785  | 17.578 | 1.00 | 18.04 | C   |
| ATOM | 1549 | C   | LYS | A | 199 | -1.443 | -7.160  | 17.098 | 1.00 | 19.50 | C   |
| ATOM | 1550 | O   | LYS | A | 199 | -2.262 | -7.986  | 16.724 | 1.00 | 20.23 | O   |
| ATOM | 1551 | CB  | LYS | A | 199 | -2.249 | -4.949  | 16.355 | 1.00 | 18.92 | C   |
| ATOM | 1552 | CG  | LYS | A | 199 | -3.608 | -4.261  | 16.389 | 1.00 | 18.14 | C   |
| ATOM | 1553 | CD  | LYS | A | 199 | -3.598 | -2.944  | 15.594 | 1.00 | 13.47 | C   |
| ATOM | 1554 | CE  | LYS | A | 199 | -2.700 | -1.907  | 16.227 | 1.00 | 8.90  | C   |
| ATOM | 1555 | NZ  | LYS | A | 199 | -2.448 | -2.218  | 17.659 | 1.00 | 9.83  | N1+ |
| ATOM | 1556 | N   | CYS | A | 200 | -0.140 | -7.375  | 17.001 | 1.00 | 21.92 | N   |
| ATOM | 1557 | CA  | CYS | A | 200 | 0.372  | -8.717  | 16.755 | 1.00 | 23.15 | C   |
| ATOM | 1558 | C   | CYS | A | 200 | 0.459  | -9.453  | 18.071 | 1.00 | 25.39 | C   |
| ATOM | 1559 | O   | CYS | A | 200 | 0.080  | -10.614 | 18.142 | 1.00 | 29.62 | O   |
| ATOM | 1560 | CB  | CYS | A | 200 | 1.762  | -8.682  | 16.118 | 1.00 | 22.40 | C   |
| ATOM | 1561 | SG  | CYS | A | 200 | 1.793  | -7.924  | 14.469 | 1.00 | 21.69 | S   |
| ATOM | 1562 | N   | ALA | A | 201 | 0.949  | -8.778  | 19.114 | 1.00 | 26.47 | N   |
| ATOM | 1563 | CA  | ALA | A | 201 | 1.139  | -9.381  | 20.440 | 1.00 | 23.93 | C   |
| ATOM | 1564 | C   | ALA | A | 201 | -0.165 | -9.943  | 20.993 | 1.00 | 21.85 | C   |
| ATOM | 1565 | O   | ALA | A | 201 | -0.208 | -11.107 | 21.360 | 1.00 | 20.07 | O   |
| ATOM | 1566 | CB  | ALA | A | 201 | 1.740  | -8.371  | 21.408 | 1.00 | 24.67 | C   |
| ATOM | 1567 | N   | SER | A | 202 | -1.245 | -9.173  | 20.919 | 1.00 | 20.21 | N   |
| ATOM | 1568 | CA  | SER | A | 202 | -2.584 | -9.760  | 20.944 | 1.00 | 22.62 | C   |
| ATOM | 1569 | C   | SER | A | 202 | -2.608 | -11.018 | 20.056 | 1.00 | 23.67 | C   |
| ATOM | 1570 | O   | SER | A | 202 | -2.798 | -12.128 | 20.544 | 1.00 | 24.94 | O   |
| ATOM | 1571 | CB  | SER | A | 202 | -3.644 | -8.779  | 20.400 | 1.00 | 23.40 | C   |
| ATOM | 1572 | OG  | SER | A | 202 | -3.857 | -7.642  | 21.221 | 1.00 | 23.09 | O   |
| ATOM | 1573 | N   | LEU | A | 203 | -2.326 | -10.847 | 18.765 | 1.00 | 24.01 | N   |
| ATOM | 1574 | CA  | LEU | A | 203 | -2.674 | -11.850 | 17.762 | 1.00 | 22.30 | C   |
| ATOM | 1575 | C   | LEU | A | 203 | -2.159 | -13.281 | 17.940 | 1.00 | 20.69 | C   |
| ATOM | 1576 | O   | LEU | A | 203 | -2.961 | -14.201 | 17.903 | 1.00 | 20.01 | O   |
| ATOM | 1577 | CB  | LEU | A | 203 | -2.320 | -11.341 | 16.368 | 1.00 | 21.07 | C   |
| ATOM | 1578 | CG  | LEU | A | 203 | -3.523 | -11.255 | 15.429 | 1.00 | 20.68 | C   |
| ATOM | 1579 | CD1 | LEU | A | 203 | -4.289 | -12.558 | 15.445 | 1.00 | 22.29 | C   |
| ATOM | 1580 | CD2 | LEU | A | 203 | -4.410 | -10.140 | 15.868 | 1.00 | 20.27 | C   |
| ATOM | 1581 | N   | GLN | A | 204 | -0.843 | -13.487 | 17.919 | 1.00 | 20.66 | N   |
| ATOM | 1582 | CA  | GLN | A | 204 | -0.277 | -14.834 | 18.099 | 1.00 | 23.10 | C   |
| ATOM | 1583 | C   | GLN | A | 204 | 1.062  | -14.932 | 18.874 | 1.00 | 24.84 | C   |
| ATOM | 1584 | O   | GLN | A | 204 | 1.816  | -15.917 | 18.736 | 1.00 | 25.14 | O   |
| ATOM | 1585 | CB  | GLN | A | 204 | -0.135 | -15.567 | 16.762 | 1.00 | 22.96 | C   |

|      |      |     |     |   |     |         |         |        |      |       |     |
|------|------|-----|-----|---|-----|---------|---------|--------|------|-------|-----|
| ATOM | 1586 | CG  | GLN | A | 204 | -0.633  | -14.814 | 15.556 | 1.00 | 24.32 | C   |
| ATOM | 1587 | CD  | GLN | A | 204 | 0.297   | -14.952 | 14.367 | 1.00 | 23.07 | C   |
| ATOM | 1588 | NE2 | GLN | A | 204 | 0.408   | -13.888 | 13.570 | 1.00 | 22.46 | N   |
| ATOM | 1589 | OE1 | GLN | A | 204 | 0.920   | -15.990 | 14.175 | 1.00 | 21.96 | O   |
| ATOM | 1590 | N   | LYS | A | 205 | 1.345   | -13.922 | 19.695 | 1.00 | 21.97 | N   |
| ATOM | 1591 | CA  | LYS | A | 205 | 2.050   | -14.152 | 20.952 | 1.00 | 18.40 | C   |
| ATOM | 1592 | C   | LYS | A | 205 | 0.998   | -14.276 | 22.063 | 1.00 | 14.76 | C   |
| ATOM | 1593 | O   | LYS | A | 205 | 1.311   | -14.599 | 23.192 | 1.00 | 13.45 | O   |
| ATOM | 1594 | CB  | LYS | A | 205 | 3.020   | -13.007 | 21.232 | 1.00 | 19.14 | C   |
| ATOM | 1595 | CG  | LYS | A | 205 | 2.841   | -12.327 | 22.558 | 1.00 | 18.87 | C   |
| ATOM | 1596 | CD  | LYS | A | 205 | 3.969   | -12.710 | 23.485 | 1.00 | 21.97 | C   |
| ATOM | 1597 | CE  | LYS | A | 205 | 5.126   | -11.720 | 23.351 | 1.00 | 23.57 | C   |
| ATOM | 1598 | NZ  | LYS | A | 205 | 6.410   | -12.330 | 23.789 | 1.00 | 23.75 | N1+ |
| ATOM | 1599 | N   | PHE | A | 206 | -0.253  | -14.040 | 21.707 | 1.00 | 12.24 | N   |
| ATOM | 1600 | CA  | PHE | A | 206 | -1.395  | -14.291 | 22.578 | 1.00 | 13.28 | C   |
| ATOM | 1601 | C   | PHE | A | 206 | -2.440  | -14.872 | 21.656 | 1.00 | 13.87 | C   |
| ATOM | 1602 | O   | PHE | A | 206 | -2.389  | -14.638 | 20.459 | 1.00 | 15.15 | O   |
| ATOM | 1603 | CB  | PHE | A | 206 | -1.945  | -12.972 | 23.110 | 1.00 | 14.11 | C   |
| ATOM | 1604 | CG  | PHE | A | 206 | -1.995  | -12.870 | 24.594 | 1.00 | 8.89  | C   |
| ATOM | 1605 | CD1 | PHE | A | 206 | -0.961  | -12.280 | 25.264 | 1.00 | 7.13  | C   |
| ATOM | 1606 | CD2 | PHE | A | 206 | -3.173  | -13.071 | 25.251 | 1.00 | 6.33  | C   |
| ATOM | 1607 | CE1 | PHE | A | 206 | -1.102  | -11.880 | 26.508 | 1.00 | 7.41  | C   |
| ATOM | 1608 | CE2 | PHE | A | 206 | -3.317  | -12.670 | 26.507 | 1.00 | 8.37  | C   |
| ATOM | 1609 | CZ  | PHE | A | 206 | -2.278  | -12.066 | 27.139 | 1.00 | 9.60  | C   |
| ATOM | 1610 | N   | GLY | A | 207 | -3.502  | -15.416 | 22.230 | 1.00 | 14.43 | N   |
| ATOM | 1611 | CA  | GLY | A | 207 | -4.553  | -16.003 | 21.425 | 1.00 | 14.40 | C   |
| ATOM | 1612 | C   | GLY | A | 207 | -5.095  | -15.066 | 20.366 | 1.00 | 15.46 | C   |
| ATOM | 1613 | O   | GLY | A | 207 | -5.411  | -13.904 | 20.628 | 1.00 | 16.20 | O   |
| ATOM | 1614 | N   | GLU | A | 208 | -5.330  | -15.625 | 19.192 | 1.00 | 15.63 | N   |
| ATOM | 1615 | CA  | GLU | A | 208 | -5.998  | -14.904 | 18.125 | 1.00 | 18.59 | C   |
| ATOM | 1616 | C   | GLU | A | 208 | -7.446  | -14.492 | 18.494 | 1.00 | 19.71 | C   |
| ATOM | 1617 | O   | GLU | A | 208 | -7.997  | -13.540 | 17.917 | 1.00 | 21.56 | O   |
| ATOM | 1618 | CB  | GLU | A | 208 | -5.971  | -15.761 | 16.845 | 1.00 | 18.16 | C   |
| ATOM | 1619 | CG  | GLU | A | 208 | -7.133  | -16.747 | 16.691 | 1.00 | 18.76 | C   |
| ATOM | 1620 | CD  | GLU | A | 208 | -8.245  | -16.193 | 15.814 | 1.00 | 19.03 | C   |
| ATOM | 1621 | OE1 | GLU | A | 208 | -8.448  | -14.963 | 15.793 | 1.00 | 18.38 | O   |
| ATOM | 1622 | OE2 | GLU | A | 208 | -8.860  | -16.979 | 15.069 | 1.00 | 22.62 | O1- |
| ATOM | 1623 | N   | ARG | A | 209 | -8.083  | -15.253 | 19.389 | 1.00 | 18.66 | N   |
| ATOM | 1624 | CA  | ARG | A | 209 | -9.477  | -15.021 | 19.769 | 1.00 | 17.70 | C   |
| ATOM | 1625 | C   | ARG | A | 209 | -9.626  | -13.656 | 20.423 | 1.00 | 18.80 | C   |
| ATOM | 1626 | O   | ARG | A | 209 | -10.580 | -12.930 | 20.170 | 1.00 | 17.41 | O   |
| ATOM | 1627 | CB  | ARG | A | 209 | -9.939  | -16.095 | 20.751 | 1.00 | 17.78 | C   |
| ATOM | 1628 | CG  | ARG | A | 209 | -11.325 | -16.650 | 20.479 | 1.00 | 22.53 | C   |
| ATOM | 1629 | CD  | ARG | A | 209 | -12.149 | -15.748 | 19.536 | 1.00 | 23.84 | C   |
| ATOM | 1630 | NE  | ARG | A | 209 | -12.523 | -14.506 | 20.204 | 1.00 | 25.57 | N   |
| ATOM | 1631 | CZ  | ARG | A | 209 | -13.644 | -13.825 | 19.989 | 1.00 | 25.17 | C   |
| ATOM | 1632 | NH1 | ARG | A | 209 | -14.470 | -14.180 | 19.011 | 1.00 | 27.58 | N1+ |
| ATOM | 1633 | NH2 | ARG | A | 209 | -13.900 | -12.739 | 20.714 | 1.00 | 24.46 | N   |
| ATOM | 1634 | N   | ALA | A | 210 | -8.623  | -13.292 | 21.210 | 1.00 | 22.42 | N   |
| ATOM | 1635 | CA  | ALA | A | 210 | -8.644  | -12.078 | 21.995 | 1.00 | 25.29 | C   |
| ATOM | 1636 | C   | ALA | A | 210 | -8.974  | -10.918 | 21.071 | 1.00 | 27.14 | C   |
| ATOM | 1637 | O   | ALA | A | 210 | -10.042 | -10.313 | 21.208 | 1.00 | 29.89 | O   |
| ATOM | 1638 | CB  | ALA | A | 210 | -7.289  | -11.867 | 22.666 | 1.00 | 24.38 | C   |
| ATOM | 1639 | N   | PHE | A | 211 | -8.173  | -10.760 | 20.012 | 1.00 | 26.77 | N   |
| ATOM | 1640 | CA  | PHE | A | 211 | -8.289  | -9.629  | 19.081 | 1.00 | 23.38 | C   |
| ATOM | 1641 | C   | PHE | A | 211 | -9.721  | -9.257  | 18.741 | 1.00 | 21.80 | C   |
| ATOM | 1642 | O   | PHE | A | 211 | -10.079 | -8.090  | 18.838 | 1.00 | 18.92 | O   |
| ATOM | 1643 | CB  | PHE | A | 211 | -7.543  | -9.926  | 17.788 | 1.00 | 25.16 | C   |
| ATOM | 1644 | CG  | PHE | A | 211 | -7.077  | -8.695  | 17.057 | 1.00 | 26.16 | C   |
| ATOM | 1645 | CD1 | PHE | A | 211 | -6.020  | -7.951  | 17.542 | 1.00 | 25.15 | C   |
| ATOM | 1646 | CD2 | PHE | A | 211 | -7.562  | -8.404  | 15.786 | 1.00 | 25.67 | C   |
| ATOM | 1647 | CE1 | PHE | A | 211 | -5.440  | -6.965  | 16.771 | 1.00 | 23.64 | C   |
| ATOM | 1648 | CE2 | PHE | A | 211 | -6.994  | -7.414  | 15.017 | 1.00 | 23.27 | C   |
| ATOM | 1649 | CZ  | PHE | A | 211 | -5.925  | -6.698  | 15.511 | 1.00 | 25.63 | C   |
| ATOM | 1650 | N   | LYS | A | 212 | -10.536 | -10.244 | 18.363 | 1.00 | 20.64 | N   |
| ATOM | 1651 | CA  | LYS | A | 212 | -11.955 | -10.003 | 18.096 | 1.00 | 20.36 | C   |
| ATOM | 1652 | C   | LYS | A | 212 | -12.497 | -9.141  | 19.218 | 1.00 | 22.63 | C   |
| ATOM | 1653 | O   | LYS | A | 212 | -12.772 | -7.964  | 19.004 | 1.00 | 24.04 | O   |
| ATOM | 1654 | CB  | LYS | A | 212 | -12.748 | -11.308 | 18.044 | 1.00 | 19.99 | C   |
| ATOM | 1655 | CG  | LYS | A | 212 | -13.261 | -11.723 | 16.651 | 1.00 | 22.19 | C   |
| ATOM | 1656 | CD  | LYS | A | 212 | -12.319 | -12.755 | 15.969 | 1.00 | 17.63 | C   |



|      |      |     |     |   |     |         |         |        |      |       |     |
|------|------|-----|-----|---|-----|---------|---------|--------|------|-------|-----|
| ATOM | 1657 | CE  | LYS | A | 212 | -13.061 | -13.725 | 15.077 | 1.00 | 14.45 | C   |
| ATOM | 1658 | NZ  | LYS | A | 212 | -14.268 | -13.106 | 14.457 | 1.00 | 14.02 | N1+ |
| ATOM | 1659 | N   | ALA | A | 213 | -12.384 | -9.642  | 20.446 | 1.00 | 22.31 | N   |
| ATOM | 1660 | CA  | ALA | A | 213 | -12.827 | -8.900  | 21.614 | 1.00 | 21.34 | C   |
| ATOM | 1661 | C   | ALA | A | 213 | -12.149 | -7.537  | 21.705 | 1.00 | 21.10 | C   |
| ATOM | 1662 | O   | ALA | A | 213 | -12.763 | -6.552  | 22.098 | 1.00 | 23.45 | O   |
| ATOM | 1663 | CB  | ALA | A | 213 | -12.569 | -9.696  | 22.871 | 1.00 | 20.73 | C   |
| ATOM | 1664 | N   | TRP | A | 214 | -10.922 | -7.437  | 21.240 | 1.00 | 19.46 | N   |
| ATOM | 1665 | CA  | TRP | A | 214 | -10.271 | -6.142  | 21.224 | 1.00 | 19.15 | C   |
| ATOM | 1666 | C   | TRP | A | 214 | -11.048 | -5.224  | 20.314 | 1.00 | 18.85 | C   |
| ATOM | 1667 | O   | TRP | A | 214 | -11.516 | -4.175  | 20.734 | 1.00 | 20.49 | O   |
| ATOM | 1668 | CB  | TRP | A | 214 | -8.870  | -6.296  | 20.686 | 1.00 | 22.36 | C   |
| ATOM | 1669 | CG  | TRP | A | 214 | -7.861  | -5.482  | 21.350 | 1.00 | 24.56 | C   |
| ATOM | 1670 | CD1 | TRP | A | 214 | -6.926  | -5.942  | 22.246 | 1.00 | 26.33 | C   |
| ATOM | 1671 | CD2 | TRP | A | 214 | -7.377  | -4.211  | 20.888 | 1.00 | 25.12 | C   |
| ATOM | 1672 | CE2 | TRP | A | 214 | -6.120  | -4.005  | 21.484 | 1.00 | 28.85 | C   |
| ATOM | 1673 | CE3 | TRP | A | 214 | -7.863  | -3.267  | 19.975 | 1.00 | 21.79 | C   |
| ATOM | 1674 | NE1 | TRP | A | 214 | -5.867  | -5.073  | 22.305 | 1.00 | 31.06 | N   |
| ATOM | 1675 | CZ2 | TRP | A | 214 | -5.341  | -2.887  | 21.189 | 1.00 | 28.30 | C   |
| ATOM | 1676 | CZ3 | TRP | A | 214 | -7.100  | -2.178  | 19.689 | 1.00 | 18.16 | C   |
| ATOM | 1677 | CH2 | TRP | A | 214 | -5.852  | -1.991  | 20.287 | 1.00 | 25.36 | C   |
| ATOM | 1678 | N   | ALA | A | 215 | -11.279 | -5.677  | 19.092 | 1.00 | 18.46 | N   |
| ATOM | 1679 | CA  | ALA | A | 215 | -11.815 | -4.819  | 18.056 | 1.00 | 18.34 | C   |
| ATOM | 1680 | C   | ALA | A | 215 | -13.346 | -4.685  | 18.072 | 1.00 | 19.69 | C   |
| ATOM | 1681 | O   | ALA | A | 215 | -13.853 | -3.636  | 17.695 | 1.00 | 19.89 | O   |
| ATOM | 1682 | CB  | ALA | A | 215 | -11.337 | -5.295  | 16.705 | 1.00 | 17.27 | C   |
| ATOM | 1683 | N   | VAL | A | 216 | -14.074 | -5.711  | 18.532 | 1.00 | 19.07 | N   |
| ATOM | 1684 | CA  | VAL | A | 216 | -15.533 | -5.613  | 18.768 | 1.00 | 18.57 | C   |
| ATOM | 1685 | C   | VAL | A | 216 | -15.801 | -4.635  | 19.911 | 1.00 | 16.42 | C   |
| ATOM | 1686 | O   | VAL | A | 216 | -16.854 | -4.013  | 19.985 | 1.00 | 16.02 | O   |
| ATOM | 1687 | CB  | VAL | A | 216 | -16.199 | -6.979  | 19.159 | 1.00 | 18.60 | C   |
| ATOM | 1688 | CG1 | VAL | A | 216 | -17.658 | -6.980  | 18.765 | 1.00 | 18.91 | C   |
| ATOM | 1689 | CG2 | VAL | A | 216 | -15.530 | -8.129  | 18.488 | 1.00 | 18.58 | C   |
| ATOM | 1690 | N   | ALA | A | 217 | -14.860 | -4.555  | 20.837 | 1.00 | 15.89 | N   |
| ATOM | 1691 | CA  | ALA | A | 217 | -14.811 | -3.444  | 21.767 | 1.00 | 17.11 | C   |
| ATOM | 1692 | C   | ALA | A | 217 | -14.553 | -2.125  | 21.050 | 1.00 | 17.79 | C   |
| ATOM | 1693 | O   | ALA | A | 217 | -15.155 | -1.114  | 21.413 | 1.00 | 20.39 | O   |
| ATOM | 1694 | CB  | ALA | A | 217 | -13.734 | -3.679  | 22.827 | 1.00 | 17.06 | C   |
| ATOM | 1695 | N   | ARG | A | 218 | -13.664 | -2.114  | 20.050 | 1.00 | 16.98 | N   |
| ATOM | 1696 | CA  | ARG | A | 218 | -13.190 | -0.845  | 19.494 | 1.00 | 14.92 | C   |
| ATOM | 1697 | C   | ARG | A | 218 | -13.902 | -0.275  | 18.310 | 1.00 | 13.69 | C   |
| ATOM | 1698 | O   | ARG | A | 218 | -14.093 | 0.920   | 18.241 | 1.00 | 17.63 | O   |
| ATOM | 1699 | CB  | ARG | A | 218 | -11.717 | -0.886  | 19.162 | 1.00 | 16.75 | C   |
| ATOM | 1700 | CG  | ARG | A | 218 | -11.031 | 0.429   | 19.482 | 1.00 | 20.34 | C   |
| ATOM | 1701 | CD  | ARG | A | 218 | -9.529  | 0.272   | 19.350 | 1.00 | 28.41 | C   |
| ATOM | 1702 | NE  | ARG | A | 218 | -8.742  | 0.955   | 20.381 | 1.00 | 31.43 | N   |
| ATOM | 1703 | CZ  | ARG | A | 218 | -7.410  | 0.999   | 20.357 | 1.00 | 31.18 | C   |
| ATOM | 1704 | NH1 | ARG | A | 218 | -6.781  | 0.627   | 19.249 | 1.00 | 33.54 | N1+ |
| ATOM | 1705 | NH2 | ARG | A | 218 | -6.709  | 1.463   | 21.392 | 1.00 | 28.29 | N   |
| ATOM | 1706 | N   | LEU | A | 219 | -14.188 | -1.074  | 17.304 | 1.00 | 13.67 | N   |
| ATOM | 1707 | CA  | LEU | A | 219 | -14.863 | -0.525  | 16.134 | 1.00 | 13.57 | C   |
| ATOM | 1708 | C   | LEU | A | 219 | -16.279 | -0.119  | 16.523 | 1.00 | 13.16 | C   |
| ATOM | 1709 | O   | LEU | A | 219 | -16.875 | 0.721   | 15.861 | 1.00 | 11.91 | O   |
| ATOM | 1710 | CB  | LEU | A | 219 | -14.861 | -1.538  | 14.977 | 1.00 | 12.34 | C   |
| ATOM | 1711 | CG  | LEU | A | 219 | -13.507 | -2.219  | 14.718 | 1.00 | 11.08 | C   |
| ATOM | 1712 | CD1 | LEU | A | 219 | -13.701 | -3.486  | 13.935 | 1.00 | 12.13 | C   |
| ATOM | 1713 | CD2 | LEU | A | 219 | -12.585 | -1.277  | 13.980 | 1.00 | 10.31 | C   |
| ATOM | 1714 | N   | SER | A | 220 | -16.711 | -0.572  | 17.704 | 1.00 | 13.60 | N   |
| ATOM | 1715 | CA  | SER | A | 220 | -18.039 | -0.287  | 18.266 | 1.00 | 13.96 | C   |
| ATOM | 1716 | C   | SER | A | 220 | -18.006 | 0.971   | 19.116 | 1.00 | 13.33 | C   |
| ATOM | 1717 | O   | SER | A | 220 | -19.027 | 1.613   | 19.324 | 1.00 | 12.54 | O   |
| ATOM | 1718 | CB  | SER | A | 220 | -18.527 | -1.462  | 19.127 | 1.00 | 15.85 | C   |
| ATOM | 1719 | OG  | SER | A | 220 | -19.168 | -2.479  | 18.357 | 1.00 | 16.62 | O   |
| ATOM | 1720 | N   | GLN | A | 221 | -16.798 | 1.360   | 19.507 | 1.00 | 15.03 | N   |
| ATOM | 1721 | CA  | GLN | A | 221 | -16.498 | 2.618   | 20.203 | 1.00 | 14.21 | C   |
| ATOM | 1722 | C   | GLN | A | 221 | -16.470 | 3.821   | 19.238 | 1.00 | 15.97 | C   |
| ATOM | 1723 | O   | GLN | A | 221 | -16.314 | 4.959   | 19.669 | 1.00 | 17.34 | O   |
| ATOM | 1724 | CB  | GLN | A | 221 | -15.127 | 2.473   | 20.843 | 1.00 | 13.10 | C   |
| ATOM | 1725 | CG  | GLN | A | 221 | -14.878 | 3.266   | 22.062 | 1.00 | 20.06 | C   |
| ATOM | 1726 | CD  | GLN | A | 221 | -14.119 | 2.455   | 23.085 | 1.00 | 24.79 | C   |
| ATOM | 1727 | NE2 | GLN | A | 221 | -14.716 | 2.285   | 24.265 | 1.00 | 27.31 | N   |

|      |      |     |     |   |     |         |         |        |      |       |     |
|------|------|-----|-----|---|-----|---------|---------|--------|------|-------|-----|
| ATOM | 1728 | OE1 | GLN | A | 221 | -13.066 | 1.884   | 22.784 | 1.00 | 24.46 | O   |
| ATOM | 1729 | N   | ARG | A | 222 | -16.391 | 3.530   | 17.937 | 1.00 | 16.06 | N   |
| ATOM | 1730 | CA  | ARG | A | 222 | -16.293 | 4.545   | 16.884 | 1.00 | 14.67 | C   |
| ATOM | 1731 | C   | ARG | A | 222 | -17.453 | 4.450   | 15.874 | 1.00 | 14.79 | C   |
| ATOM | 1732 | O   | ARG | A | 222 | -17.942 | 5.455   | 15.360 | 1.00 | 16.58 | O   |
| ATOM | 1733 | CB  | ARG | A | 222 | -14.951 | 4.423   | 16.141 | 1.00 | 13.32 | C   |
| ATOM | 1734 | CG  | ARG | A | 222 | -13.933 | 3.526   | 16.803 | 1.00 | 10.78 | C   |
| ATOM | 1735 | CD  | ARG | A | 222 | -12.562 | 4.147   | 16.820 | 1.00 | 14.99 | C   |
| ATOM | 1736 | NE  | ARG | A | 222 | -11.738 | 3.584   | 17.887 | 1.00 | 16.71 | N   |
| ATOM | 1737 | CZ  | ARG | A | 222 | -10.937 | 4.294   | 18.683 | 1.00 | 17.32 | C   |
| ATOM | 1738 | NH1 | ARG | A | 222 | -10.806 | 5.607   | 18.507 | 1.00 | 16.06 | N1+ |
| ATOM | 1739 | NH2 | ARG | A | 222 | -10.252 | 3.687   | 19.654 | 1.00 | 12.90 | N   |
| ATOM | 1740 | N   | PHE | A | 223 | -17.957 | 3.250   | 15.647 | 1.00 | 14.56 | N   |
| ATOM | 1741 | CA  | PHE | A | 223 | -19.111 | 3.084   | 14.792 | 1.00 | 12.35 | C   |
| ATOM | 1742 | C   | PHE | A | 223 | -20.298 | 2.602   | 15.626 | 1.00 | 13.17 | C   |
| ATOM | 1743 | O   | PHE | A | 223 | -20.916 | 1.601   | 15.272 | 1.00 | 12.50 | O   |
| ATOM | 1744 | CB  | PHE | A | 223 | -18.820 | 2.042   | 13.706 | 1.00 | 15.57 | C   |
| ATOM | 1745 | CG  | PHE | A | 223 | -17.648 | 2.373   | 12.788 | 1.00 | 18.20 | C   |
| ATOM | 1746 | CD1 | PHE | A | 223 | -16.762 | 3.398   | 13.060 | 1.00 | 18.12 | C   |
| ATOM | 1747 | CD2 | PHE | A | 223 | -17.389 | 1.571   | 11.689 | 1.00 | 19.72 | C   |
| ATOM | 1748 | CE1 | PHE | A | 223 | -15.642 | 3.594   | 12.261 | 1.00 | 20.71 | C   |
| ATOM | 1749 | CE2 | PHE | A | 223 | -16.274 | 1.765   | 10.896 | 1.00 | 18.61 | C   |
| ATOM | 1750 | CZ  | PHE | A | 223 | -15.401 | 2.767   | 11.182 | 1.00 | 18.31 | C   |
| ATOM | 1751 | N   | PRO | A | 224 | -20.667 | 3.323   | 16.717 | 1.00 | 14.94 | N   |
| ATOM | 1752 | CA  | PRO | A | 224 | -21.635 | 2.860   | 17.714 | 1.00 | 14.17 | C   |
| ATOM | 1753 | C   | PRO | A | 224 | -23.096 | 2.979   | 17.275 | 1.00 | 15.44 | C   |
| ATOM | 1754 | O   | PRO | A | 224 | -23.942 | 3.488   | 18.004 | 1.00 | 16.00 | O   |
| ATOM | 1755 | CB  | PRO | A | 224 | -21.344 | 3.757   | 18.900 | 1.00 | 13.07 | C   |
| ATOM | 1756 | CG  | PRO | A | 224 | -21.074 | 5.010   | 18.284 | 1.00 | 14.26 | C   |
| ATOM | 1757 | CD  | PRO | A | 224 | -20.226 | 4.679   | 17.073 | 1.00 | 17.21 | C   |
| ATOM | 1758 | N   | LYS | A | 225 | -23.347 | 2.630   | 16.026 | 1.00 | 15.99 | N   |
| ATOM | 1759 | CA  | LYS | A | 225 | -24.668 | 2.300   | 15.555 | 1.00 | 15.34 | C   |
| ATOM | 1760 | C   | LYS | A | 225 | -24.515 | 1.109   | 14.603 | 1.00 | 20.08 | C   |
| ATOM | 1761 | O   | LYS | A | 225 | -25.481 | 0.396   | 14.332 | 1.00 | 23.63 | O   |
| ATOM | 1762 | CB  | LYS | A | 225 | -25.285 | 3.490   | 14.839 | 1.00 | 10.48 | C   |
| ATOM | 1763 | CG  | LYS | A | 225 | -24.358 | 4.174   | 13.887 | 1.00 | 10.33 | C   |
| ATOM | 1764 | CD  | LYS | A | 225 | -24.354 | 5.652   | 14.130 | 1.00 | 9.50  | C   |
| ATOM | 1765 | CE  | LYS | A | 225 | -25.685 | 6.266   | 13.772 | 1.00 | 11.24 | C   |
| ATOM | 1766 | NZ  | LYS | A | 225 | -25.779 | 7.709   | 14.196 | 1.00 | 13.92 | N1+ |
| ATOM | 1767 | N   | ALA | A | 226 | -23.282 | 0.839   | 14.171 | 1.00 | 21.60 | N   |
| ATOM | 1768 | CA  | ALA | A | 226 | -22.963 | -0.387  | 13.446 | 1.00 | 22.74 | C   |
| ATOM | 1769 | C   | ALA | A | 226 | -23.686 | -1.533  | 14.133 | 1.00 | 23.96 | C   |
| ATOM | 1770 | O   | ALA | A | 226 | -23.520 | -1.710  | 15.331 | 1.00 | 28.06 | O   |
| ATOM | 1771 | CB  | ALA | A | 226 | -21.474 | -0.630  | 13.497 | 1.00 | 21.05 | C   |
| ATOM | 1772 | N   | GLU | A | 227 | -24.595 | -2.212  | 13.446 | 1.00 | 23.06 | N   |
| ATOM | 1773 | CA  | GLU | A | 227 | -25.267 | -3.340  | 14.079 | 1.00 | 20.89 | C   |
| ATOM | 1774 | C   | GLU | A | 227 | -24.243 | -4.476  | 14.307 | 1.00 | 18.38 | C   |
| ATOM | 1775 | O   | GLU | A | 227 | -23.142 | -4.455  | 13.748 | 1.00 | 11.59 | O   |
| ATOM | 1776 | CB  | GLU | A | 227 | -26.507 | -3.810  | 13.258 | 1.00 | 22.63 | C   |
| ATOM | 1777 | CG  | GLU | A | 227 | -27.720 | -2.794  | 13.205 | 1.00 | 26.40 | C   |
| ATOM | 1778 | CD  | GLU | A | 227 | -28.944 | -3.104  | 14.146 | 1.00 | 29.49 | C   |
| ATOM | 1779 | OE1 | GLU | A | 227 | -28.945 | -4.106  | 14.913 | 1.00 | 29.48 | O   |
| ATOM | 1780 | OE2 | GLU | A | 227 | -29.925 | -2.315  | 14.120 | 1.00 | 26.69 | O1- |
| ATOM | 1781 | N   | PHE | A | 228 | -24.524 | -5.295  | 15.321 | 1.00 | 19.59 | N   |
| ATOM | 1782 | CA  | PHE | A | 228 | -23.714 | -6.468  | 15.669 | 1.00 | 21.16 | C   |
| ATOM | 1783 | C   | PHE | A | 228 | -23.418 | -7.380  | 14.467 | 1.00 | 22.82 | C   |
| ATOM | 1784 | O   | PHE | A | 228 | -22.343 | -8.002  | 14.393 | 1.00 | 22.75 | O   |
| ATOM | 1785 | CB  | PHE | A | 228 | -24.392 | -7.285  | 16.798 | 1.00 | 19.31 | C   |
| ATOM | 1786 | CG  | PHE | A | 228 | -23.470 | -8.270  | 17.481 | 1.00 | 15.55 | C   |
| ATOM | 1787 | CD1 | PHE | A | 228 | -22.401 | -7.826  | 18.231 | 1.00 | 11.82 | C   |
| ATOM | 1788 | CD2 | PHE | A | 228 | -23.598 | -9.636  | 17.254 | 1.00 | 13.74 | C   |
| ATOM | 1789 | CE1 | PHE | A | 228 | -21.482 | -8.709  | 18.727 | 1.00 | 11.35 | C   |
| ATOM | 1790 | CE2 | PHE | A | 228 | -22.675 | -10.526 | 17.751 | 1.00 | 10.57 | C   |
| ATOM | 1791 | CZ  | PHE | A | 228 | -21.620 | -10.067 | 18.485 | 1.00 | 10.53 | C   |
| ATOM | 1792 | N   | ALA | A | 229 | -24.362 | -7.472  | 13.532 | 1.00 | 22.31 | N   |
| ATOM | 1793 | CA  | ALA | A | 229 | -24.033 | -7.999  | 12.215 | 1.00 | 21.94 | C   |
| ATOM | 1794 | C   | ALA | A | 229 | -22.699 | -7.383  | 11.737 | 1.00 | 22.28 | C   |
| ATOM | 1795 | O   | ALA | A | 229 | -21.645 | -7.988  | 11.955 | 1.00 | 22.58 | O   |
| ATOM | 1796 | CB  | ALA | A | 229 | -25.157 | -7.698  | 11.238 | 1.00 | 18.80 | C   |
| ATOM | 1797 | N   | GLU | A | 230 | -22.718 | -6.071  | 11.494 | 1.00 | 23.17 | N   |
| ATOM | 1798 | CA  | GLU | A | 230 | -21.634 | -5.373  | 10.779 | 1.00 | 22.57 | C   |

|      |      |     |     |   |     |         |         |        |      |       |     |
|------|------|-----|-----|---|-----|---------|---------|--------|------|-------|-----|
| ATOM | 1799 | C   | GLU | A | 230 | -20.289 | -5.093  | 11.487 | 1.00 | 21.60 | C   |
| ATOM | 1800 | O   | GLU | A | 230 | -19.291 | -4.855  | 10.813 | 1.00 | 20.95 | O   |
| ATOM | 1801 | CB  | GLU | A | 230 | -22.147 | -4.061  | 10.165 | 1.00 | 19.48 | C   |
| ATOM | 1802 | CG  | GLU | A | 230 | -21.896 | -3.975  | 8.671  | 1.00 | 17.15 | C   |
| ATOM | 1803 | CD  | GLU | A | 230 | -22.865 | -4.813  | 7.850  | 1.00 | 17.55 | C   |
| ATOM | 1804 | OE1 | GLU | A | 230 | -23.995 | -4.329  | 7.598  | 1.00 | 17.87 | O   |
| ATOM | 1805 | OE2 | GLU | A | 230 | -22.488 | -5.926  | 7.409  | 1.00 | 15.08 | O1- |
| ATOM | 1806 | N   | VAL | A | 231 | -20.231 | -5.073  | 12.814 | 1.00 | 20.69 | N   |
| ATOM | 1807 | CA  | VAL | A | 231 | -18.917 | -5.007  | 13.435 | 1.00 | 16.38 | C   |
| ATOM | 1808 | C   | VAL | A | 231 | -18.287 | -6.364  | 13.136 | 1.00 | 20.32 | C   |
| ATOM | 1809 | O   | VAL | A | 231 | -17.101 | -6.442  | 12.828 | 1.00 | 21.55 | O   |
| ATOM | 1810 | CB  | VAL | A | 231 | -18.978 | -4.758  | 14.964 | 1.00 | 12.08 | C   |
| ATOM | 1811 | CG1 | VAL | A | 231 | -17.812 | -5.401  | 15.645 | 1.00 | 11.97 | C   |
| ATOM | 1812 | CG2 | VAL | A | 231 | -18.937 | -3.285  | 15.262 | 1.00 | 11.69 | C   |
| ATOM | 1813 | N   | SER | A | 232 | -19.108 | -7.408  | 13.049 | 1.00 | 22.30 | N   |
| ATOM | 1814 | CA  | SER | A | 232 | -18.566 | -8.749  | 12.844 | 1.00 | 25.21 | C   |
| ATOM | 1815 | C   | SER | A | 232 | -18.383 | -9.125  | 11.373 | 1.00 | 26.83 | C   |
| ATOM | 1816 | O   | SER | A | 232 | -18.337 | -10.306 | 11.009 | 1.00 | 28.08 | O   |
| ATOM | 1817 | CB  | SER | A | 232 | -19.408 | -9.788  | 13.586 | 1.00 | 25.39 | C   |
| ATOM | 1818 | OG  | SER | A | 232 | -18.793 | -10.070 | 14.841 | 1.00 | 28.11 | O   |
| ATOM | 1819 | N   | LYS | A | 233 | -18.260 | -8.096  | 10.536 | 1.00 | 26.97 | N   |
| ATOM | 1820 | CA  | LYS | A | 233 | -17.661 | -8.228  | 9.225  | 1.00 | 23.19 | C   |
| ATOM | 1821 | C   | LYS | A | 233 | -16.769 | -7.018  | 9.066  | 1.00 | 20.48 | C   |
| ATOM | 1822 | O   | LYS | A | 233 | -16.735 | -6.421  | 8.012  | 1.00 | 21.98 | O   |
| ATOM | 1823 | CB  | LYS | A | 233 | -18.733 | -8.254  | 8.133  | 1.00 | 25.56 | C   |
| ATOM | 1824 | CG  | LYS | A | 233 | -18.198 | -8.687  | 6.754  | 1.00 | 29.24 | C   |
| ATOM | 1825 | CD  | LYS | A | 233 | -19.299 | -9.170  | 5.786  | 1.00 | 28.84 | C   |
| ATOM | 1826 | CE  | LYS | A | 233 | -18.745 | -10.207 | 4.785  | 1.00 | 29.50 | C   |
| ATOM | 1827 | NZ  | LYS | A | 233 | -19.637 | -10.474 | 3.618  | 1.00 | 28.23 | N1+ |
| ATOM | 1828 | N   | LEU | A | 234 | -16.191 | -6.564  | 10.174 | 1.00 | 19.32 | N   |
| ATOM | 1829 | CA  | LEU | A | 234 | -15.119 | -5.570  | 10.155 | 1.00 | 19.26 | C   |
| ATOM | 1830 | C   | LEU | A | 234 | -13.971 | -6.022  | 11.075 | 1.00 | 20.45 | C   |
| ATOM | 1831 | O   | LEU | A | 234 | -12.798 | -5.927  | 10.710 | 1.00 | 20.91 | O   |
| ATOM | 1832 | CB  | LEU | A | 234 | -15.623 | -4.191  | 10.598 | 1.00 | 18.55 | C   |
| ATOM | 1833 | CG  | LEU | A | 234 | -16.945 | -3.619  | 10.054 | 1.00 | 20.65 | C   |
| ATOM | 1834 | CD1 | LEU | A | 234 | -17.229 | -2.274  | 10.718 | 1.00 | 20.73 | C   |
| ATOM | 1835 | CD2 | LEU | A | 234 | -16.900 | -3.452  | 8.536  | 1.00 | 18.64 | C   |
| ATOM | 1836 | N   | VAL | A | 235 | -14.308 | -6.626  | 12.214 | 1.00 | 19.59 | N   |
| ATOM | 1837 | CA  | VAL | A | 235 | -13.301 | -7.227  | 13.089 | 1.00 | 16.45 | C   |
| ATOM | 1838 | C   | VAL | A | 235 | -12.927 | -8.677  | 12.704 | 1.00 | 16.23 | C   |
| ATOM | 1839 | O   | VAL | A | 235 | -11.848 | -9.153  | 13.054 | 1.00 | 17.61 | O   |
| ATOM | 1840 | CB  | VAL | A | 235 | -13.756 | -7.164  | 14.556 | 1.00 | 14.01 | C   |
| ATOM | 1841 | CG1 | VAL | A | 235 | -15.208 | -7.513  | 14.660 | 1.00 | 14.30 | C   |
| ATOM | 1842 | CG2 | VAL | A | 235 | -12.943 | -8.102  | 15.421 | 1.00 | 14.29 | C   |
| ATOM | 1843 | N   | THR | A | 236 | -13.808 | -9.361  | 11.976 | 1.00 | 13.39 | N   |
| ATOM | 1844 | CA  | THR | A | 236 | -13.512 | -10.659 | 11.367 | 1.00 | 10.14 | C   |
| ATOM | 1845 | C   | THR | A | 236 | -12.673 | -10.444 | 10.102 | 1.00 | 12.00 | C   |
| ATOM | 1846 | O   | THR | A | 236 | -11.962 | -11.342 | 9.665  | 1.00 | 10.48 | O   |
| ATOM | 1847 | CB  | THR | A | 236 | -14.803 | -11.359 | 10.949 | 1.00 | 9.09  | C   |
| ATOM | 1848 | CG2 | THR | A | 236 | -14.960 | -12.671 | 11.657 | 1.00 | 10.99 | C   |
| ATOM | 1849 | OG1 | THR | A | 236 | -15.914 | -10.525 | 11.281 | 1.00 | 5.10  | O   |
| ATOM | 1850 | N   | ASP | A | 237 | -12.708 | -9.207  | 9.592  | 1.00 | 13.66 | N   |
| ATOM | 1851 | CA  | ASP | A | 237 | -12.113 | -8.807  | 8.320  | 1.00 | 12.69 | C   |
| ATOM | 1852 | C   | ASP | A | 237 | -10.804 | -8.086  | 8.567  | 1.00 | 16.23 | C   |
| ATOM | 1853 | O   | ASP | A | 237 | -10.160 | -7.609  | 7.622  | 1.00 | 17.55 | O   |
| ATOM | 1854 | CB  | ASP | A | 237 | -13.052 | -7.857  | 7.581  | 1.00 | 9.81  | C   |
| ATOM | 1855 | CG  | ASP | A | 237 | -14.195 | -8.580  | 6.879  | 1.00 | 15.79 | C   |
| ATOM | 1856 | OD1 | ASP | A | 237 | -14.151 | -9.824  | 6.788  | 1.00 | 20.11 | O   |
| ATOM | 1857 | OD2 | ASP | A | 237 | -15.114 | -7.914  | 6.350  | 1.00 | 14.61 | O1- |
| ATOM | 1858 | N   | LEU | A | 238 | -10.504 | -7.875  | 9.849  | 1.00 | 17.84 | N   |
| ATOM | 1859 | CA  | LEU | A | 238 | -9.376  | -7.046  | 10.284 | 1.00 | 17.70 | C   |
| ATOM | 1860 | C   | LEU | A | 238 | -8.366  | -7.946  | 10.952 | 1.00 | 17.11 | C   |
| ATOM | 1861 | O   | LEU | A | 238 | -7.171  | -7.656  | 10.954 | 1.00 | 18.24 | O   |
| ATOM | 1862 | CB  | LEU | A | 238 | -9.830  | -6.016  | 11.310 | 1.00 | 18.48 | C   |
| ATOM | 1863 | CG  | LEU | A | 238 | -9.252  | -4.614  | 11.261 | 1.00 | 15.02 | C   |
| ATOM | 1864 | CD1 | LEU | A | 238 | -10.258 | -3.748  | 10.568 | 1.00 | 13.60 | C   |
| ATOM | 1865 | CD2 | LEU | A | 238 | -8.989  | -4.102  | 12.650 | 1.00 | 11.12 | C   |
| ATOM | 1866 | N   | THR | A | 239 | -8.868  | -8.928  | 11.684 | 1.00 | 15.12 | N   |
| ATOM | 1867 | CA  | THR | A | 239 | -8.031  | -10.025 | 12.104 | 1.00 | 15.74 | C   |
| ATOM | 1868 | C   | THR | A | 239 | -7.229  | -10.453 | 10.851 | 1.00 | 16.69 | C   |
| ATOM | 1869 | O   | THR | A | 239 | -6.120  | -9.942  | 10.661 | 1.00 | 18.36 | O   |

|      |      |     |     |   |     |        |         |        |      |       |     |
|------|------|-----|-----|---|-----|--------|---------|--------|------|-------|-----|
| ATOM | 1870 | CB  | THR | A | 239 | -8.899 | -11.180 | 12.745 | 1.00 | 15.86 | C   |
| ATOM | 1871 | CG2 | THR | A | 239 | -8.061 | -12.423 | 13.008 | 1.00 | 12.44 | C   |
| ATOM | 1872 | OG1 | THR | A | 239 | -9.476 | -10.724 | 13.988 | 1.00 | 7.33  | O   |
| ATOM | 1873 | N   | LYS | A | 240 | -7.899 | -11.064 | 9.873  | 1.00 | 15.75 | N   |
| ATOM | 1874 | CA  | LYS | A | 240 | -7.262 | -11.521 | 8.617  | 1.00 | 14.50 | C   |
| ATOM | 1875 | C   | LYS | A | 240 | -6.100 | -10.649 | 8.114  | 1.00 | 12.60 | C   |
| ATOM | 1876 | O   | LYS | A | 240 | -5.042 | -11.164 | 7.764  | 1.00 | 12.12 | O   |
| ATOM | 1877 | CB  | LYS | A | 240 | -8.314 | -11.608 | 7.513  | 1.00 | 13.34 | C   |
| ATOM | 1878 | CG  | LYS | A | 240 | -8.390 | -12.935 | 6.845  | 1.00 | 16.59 | C   |
| ATOM | 1879 | CD  | LYS | A | 240 | -9.351 | -12.874 | 5.664  | 1.00 | 23.14 | C   |
| ATOM | 1880 | CE  | LYS | A | 240 | -8.943 | -13.846 | 4.544  | 1.00 | 26.65 | C   |
| ATOM | 1881 | NZ  | LYS | A | 240 | -7.629 | -13.487 | 3.874  | 1.00 | 31.21 | N1+ |
| ATOM | 1882 | N   | VAL | A | 241 | -6.361 | -9.349  | 7.966  | 1.00 | 12.72 | N   |
| ATOM | 1883 | CA  | VAL | A | 241 | -5.359 | -8.348  | 7.614  | 1.00 | 9.66  | C   |
| ATOM | 1884 | C   | VAL | A | 241 | -4.266 | -8.481  | 8.636  | 1.00 | 11.94 | C   |
| ATOM | 1885 | O   | VAL | A | 241 | -3.289 | -9.155  | 8.386  | 1.00 | 14.55 | O   |
| ATOM | 1886 | CB  | VAL | A | 241 | -5.909 | -6.900  | 7.705  | 1.00 | 8.96  | C   |
| ATOM | 1887 | CG1 | VAL | A | 241 | -4.808 | -5.903  | 7.469  | 1.00 | 6.95  | C   |
| ATOM | 1888 | CG2 | VAL | A | 241 | -7.030 | -6.681  | 6.719  | 1.00 | 7.52  | C   |
| ATOM | 1889 | N   | HIS | A | 242 | -4.541 | -8.050  | 9.858  | 1.00 | 11.85 | N   |
| ATOM | 1890 | CA  | HIS | A | 242 | -3.490 | -7.939  | 10.863 | 1.00 | 17.50 | C   |
| ATOM | 1891 | C   | HIS | A | 242 | -2.715 | -9.236  | 11.110 | 1.00 | 19.56 | C   |
| ATOM | 1892 | O   | HIS | A | 242 | -1.490 | -9.212  | 11.321 | 1.00 | 19.10 | O   |
| ATOM | 1893 | CB  | HIS | A | 242 | -4.071 | -7.433  | 12.179 | 1.00 | 19.40 | C   |
| ATOM | 1894 | CG  | HIS | A | 242 | -4.033 | -5.949  | 12.311 | 1.00 | 17.51 | C   |
| ATOM | 1895 | CD2 | HIS | A | 242 | -3.023 | -5.113  | 12.638 | 1.00 | 17.18 | C   |
| ATOM | 1896 | ND1 | HIS | A | 242 | -5.063 | -5.146  | 11.870 | 1.00 | 14.59 | N   |
| ATOM | 1897 | CE1 | HIS | A | 242 | -4.680 | -3.885  | 11.896 | 1.00 | 14.07 | C   |
| ATOM | 1898 | NE2 | HIS | A | 242 | -3.445 | -3.842  | 12.360 | 1.00 | 20.83 | N   |
| ATOM | 1899 | N   | THR | A | 243 | -3.419 | -10.364 | 11.043 | 1.00 | 20.29 | N   |
| ATOM | 1900 | CA  | THR | A | 243 | -2.791 | -11.653 | 11.247 | 1.00 | 21.66 | C   |
| ATOM | 1901 | C   | THR | A | 243 | -1.638 | -11.802 | 10.259 | 1.00 | 22.36 | C   |
| ATOM | 1902 | O   | THR | A | 243 | -0.494 | -11.979 | 10.667 | 1.00 | 20.98 | O   |
| ATOM | 1903 | CB  | THR | A | 243 | -3.803 | -12.808 | 11.058 | 1.00 | 22.04 | C   |
| ATOM | 1904 | CG2 | THR | A | 243 | -4.560 | -13.061 | 12.338 | 1.00 | 19.78 | C   |
| ATOM | 1905 | OG1 | THR | A | 243 | -4.743 | -12.465 | 10.030 | 1.00 | 22.04 | O   |
| ATOM | 1906 | N   | GLU | A | 244 | -1.923 | -11.503 | 8.994  | 1.00 | 24.92 | N   |
| ATOM | 1907 | CA  | GLU | A | 244 | -0.963 | -11.634 | 7.884  | 1.00 | 24.81 | C   |
| ATOM | 1908 | C   | GLU | A | 244 | 0.269  | -10.751 | 8.073  | 1.00 | 24.55 | C   |
| ATOM | 1909 | O   | GLU | A | 244 | 1.365  | -11.289 | 8.316  | 1.00 | 25.76 | O   |
| ATOM | 1910 | CB  | GLU | A | 244 | -1.654 | -11.320 | 6.540  | 1.00 | 21.04 | C   |
| ATOM | 1911 | CG  | GLU | A | 244 | -2.417 | -12.526 | 5.981  | 1.00 | 20.42 | C   |
| ATOM | 1912 | CD  | GLU | A | 244 | -3.749 | -12.186 | 5.369  | 1.00 | 16.71 | C   |
| ATOM | 1913 | OE1 | GLU | A | 244 | -3.861 | -11.097 | 4.794  | 1.00 | 19.88 | O   |
| ATOM | 1914 | OE2 | GLU | A | 244 | -4.670 | -13.029 | 5.410  | 1.00 | 15.80 | O1- |
| ATOM | 1915 | N   | CYS | A | 245 | 0.061  | -9.426  | 8.150  | 1.00 | 23.02 | N   |
| ATOM | 1916 | CA  | CYS | A | 245 | 1.148  | -8.466  | 8.429  | 1.00 | 21.48 | C   |
| ATOM | 1917 | C   | CYS | A | 245 | 1.936  | -8.829  | 9.702  | 1.00 | 21.49 | C   |
| ATOM | 1918 | O   | CYS | A | 245 | 2.965  | -8.215  | 10.000 | 1.00 | 20.53 | O   |
| ATOM | 1919 | CB  | CYS | A | 245 | 0.604  | -7.039  | 8.577  | 1.00 | 20.81 | C   |
| ATOM | 1920 | SG  | CYS | A | 245 | 0.340  | -6.068  | 7.058  | 1.00 | 19.72 | S   |
| ATOM | 1921 | N   | CYS | A | 246 | 1.434  | -9.803  | 10.458 | 1.00 | 20.66 | N   |
| ATOM | 1922 | CA  | CYS | A | 246 | 2.133  | -10.288 | 11.635 | 1.00 | 22.93 | C   |
| ATOM | 1923 | C   | CYS | A | 246 | 2.810  | -11.634 | 11.342 | 1.00 | 23.54 | C   |
| ATOM | 1924 | O   | CYS | A | 246 | 4.001  | -11.829 | 11.613 | 1.00 | 23.49 | O   |
| ATOM | 1925 | CB  | CYS | A | 246 | 1.150  | -10.431 | 12.828 | 1.00 | 23.38 | C   |
| ATOM | 1926 | SG  | CYS | A | 246 | 0.340  | -8.909  | 13.476 | 1.00 | 21.26 | S   |
| ATOM | 1927 | N   | HIS | A | 247 | 2.054  | -12.531 | 10.717 | 1.00 | 26.98 | N   |
| ATOM | 1928 | CA  | HIS | A | 247 | 2.461  | -13.924 | 10.463 | 1.00 | 28.41 | C   |
| ATOM | 1929 | C   | HIS | A | 247 | 3.551  | -14.018 | 9.371  | 1.00 | 27.16 | C   |
| ATOM | 1930 | O   | HIS | A | 247 | 3.999  | -15.107 | 8.996  | 1.00 | 24.90 | O   |
| ATOM | 1931 | CB  | HIS | A | 247 | 1.221  | -14.734 | 10.034 | 1.00 | 30.64 | C   |
| ATOM | 1932 | CG  | HIS | A | 247 | 0.887  | -15.871 | 10.953 | 1.00 | 33.09 | C   |
| ATOM | 1933 | CD2 | HIS | A | 247 | 1.675  | -16.666 | 11.718 | 1.00 | 31.19 | C   |
| ATOM | 1934 | ND1 | HIS | A | 247 | -0.397 | -16.372 | 11.077 | 1.00 | 32.64 | N   |
| ATOM | 1935 | CE1 | HIS | A | 247 | -0.383 | -17.423 | 11.881 | 1.00 | 32.18 | C   |
| ATOM | 1936 | NE2 | HIS | A | 247 | 0.859  | -17.616 | 12.285 | 1.00 | 34.75 | N   |
| ATOM | 1937 | N   | GLY | A | 248 | 3.882  | -12.875 | 8.788  | 1.00 | 26.19 | N   |
| ATOM | 1938 | CA  | GLY | A | 248 | 5.010  | -12.822 | 7.893  | 1.00 | 24.62 | C   |
| ATOM | 1939 | C   | GLY | A | 248 | 4.560  | -12.235 | 6.584  | 1.00 | 24.54 | C   |
| ATOM | 1940 | O   | GLY | A | 248 | 5.066  | -11.200 | 6.176  | 1.00 | 25.55 | O   |

|      |      |     |     |   |     |        |         |        |      |       |     |
|------|------|-----|-----|---|-----|--------|---------|--------|------|-------|-----|
| ATOM | 1941 | N   | ASP | A | 249 | 3.553  | -12.847 | 5.966  | 1.00 | 23.88 | N   |
| ATOM | 1942 | CA  | ASP | A | 249 | 3.154  | -12.470 | 4.619  | 1.00 | 20.47 | C   |
| ATOM | 1943 | C   | ASP | A | 249 | 2.317  | -11.215 | 4.621  | 1.00 | 20.76 | C   |
| ATOM | 1944 | O   | ASP | A | 249 | 1.132  | -11.257 | 4.957  | 1.00 | 21.26 | O   |
| ATOM | 1945 | CB  | ASP | A | 249 | 2.408  | -13.612 | 3.903  | 1.00 | 20.40 | C   |
| ATOM | 1946 | CG  | ASP | A | 249 | 1.351  | -14.282 | 4.764  | 1.00 | 18.24 | C   |
| ATOM | 1947 | OD1 | ASP | A | 249 | 1.703  | -15.199 | 5.537  | 1.00 | 19.57 | O   |
| ATOM | 1948 | OD2 | ASP | A | 249 | 0.152  | -14.040 | 4.523  | 1.00 | 17.76 | O1- |
| ATOM | 1949 | N   | LEU | A | 250 | 3.003  | -10.087 | 4.423  | 1.00 | 20.08 | N   |
| ATOM | 1950 | CA  | LEU | A | 250 | 2.373  | -8.789  | 4.180  | 1.00 | 20.75 | C   |
| ATOM | 1951 | C   | LEU | A | 250 | 1.422  | -8.841  | 2.956  | 1.00 | 23.97 | C   |
| ATOM | 1952 | O   | LEU | A | 250 | 0.246  | -9.180  | 3.084  | 1.00 | 24.23 | O   |
| ATOM | 1953 | CB  | LEU | A | 250 | 3.427  | -7.715  | 3.892  | 1.00 | 18.42 | C   |
| ATOM | 1954 | CG  | LEU | A | 250 | 4.765  | -7.394  | 4.537  | 1.00 | 17.52 | C   |
| ATOM | 1955 | CD1 | LEU | A | 250 | 5.333  | -8.472  | 5.381  | 1.00 | 20.69 | C   |
| ATOM | 1956 | CD2 | LEU | A | 250 | 5.689  | -7.106  | 3.393  | 1.00 | 20.41 | C   |
| ATOM | 1957 | N   | LEU | A | 251 | 1.964  | -8.473  | 1.788  | 1.00 | 24.70 | N   |
| ATOM | 1958 | CA  | LEU | A | 251 | 1.273  | -8.329  | 0.499  | 1.00 | 21.99 | C   |
| ATOM | 1959 | C   | LEU | A | 251 | -0.227 | -8.608  | 0.403  | 1.00 | 22.01 | C   |
| ATOM | 1960 | O   | LEU | A | 251 | -0.983 | -7.834  | -0.179 | 1.00 | 19.96 | O   |
| ATOM | 1961 | CB  | LEU | A | 251 | 2.016  | -9.161  | -0.540 | 1.00 | 22.73 | C   |
| ATOM | 1962 | CG  | LEU | A | 251 | 3.503  | -8.825  | -0.674 | 1.00 | 21.62 | C   |
| ATOM | 1963 | CD1 | LEU | A | 251 | 4.302  | -9.609  | 0.354  | 1.00 | 22.59 | C   |
| ATOM | 1964 | CD2 | LEU | A | 251 | 3.972  | -9.145  | -2.085 | 1.00 | 20.79 | C   |
| ATOM | 1965 | N   | GLU | A | 252 | -0.633 | -9.779  | 0.856  | 1.00 | 23.52 | N   |
| ATOM | 1966 | CA  | GLU | A | 252 | -2.053 | -10.078 | 0.994  | 1.00 | 24.95 | C   |
| ATOM | 1967 | C   | GLU | A | 252 | -2.699 | -8.956  | 1.840  | 1.00 | 25.20 | C   |
| ATOM | 1968 | O   | GLU | A | 252 | -3.583 | -8.247  | 1.364  | 1.00 | 26.85 | O   |
| ATOM | 1969 | CB  | GLU | A | 252 | -2.225 | -11.463 | 1.648  | 1.00 | 23.50 | C   |
| ATOM | 1970 | CG  | GLU | A | 252 | -1.702 | -12.659 | 0.793  | 1.00 | 23.59 | C   |
| ATOM | 1971 | CD  | GLU | A | 252 | -0.211 | -12.968 | 0.966  | 1.00 | 22.46 | C   |
| ATOM | 1972 | OE1 | GLU | A | 252 | 0.548  | -12.064 | 1.372  | 1.00 | 21.42 | O   |
| ATOM | 1973 | OE2 | GLU | A | 252 | 0.212  | -14.112 | 0.667  | 1.00 | 20.54 | O1- |
| ATOM | 1974 | N   | CYS | A | 253 | -2.113 | -8.683  | 3.002  | 1.00 | 23.06 | N   |
| ATOM | 1975 | CA  | CYS | A | 253 | -2.418 | -7.509  | 3.825  | 1.00 | 21.89 | C   |
| ATOM | 1976 | C   | CYS | A | 253 | -2.879 | -6.277  | 3.017  | 1.00 | 22.51 | C   |
| ATOM | 1977 | O   | CYS | A | 253 | -4.077 | -5.982  | 2.928  | 1.00 | 18.60 | O   |
| ATOM | 1978 | CB  | CYS | A | 253 | -1.171 | -7.153  | 4.662  | 1.00 | 20.32 | C   |
| ATOM | 1979 | SG  | CYS | A | 253 | -1.466 | -6.653  | 6.385  | 1.00 | 15.33 | S   |
| ATOM | 1980 | N   | ALA | A | 254 | -1.921 | -5.638  | 2.345  | 1.00 | 22.49 | N   |
| ATOM | 1981 | CA  | ALA | A | 254 | -2.105 | -4.310  | 1.755  | 1.00 | 22.36 | C   |
| ATOM | 1982 | C   | ALA | A | 254 | -3.233 | -4.310  | 0.727  | 1.00 | 22.41 | C   |
| ATOM | 1983 | O   | ALA | A | 254 | -3.812 | -3.264  | 0.430  | 1.00 | 20.73 | O   |
| ATOM | 1984 | CB  | ALA | A | 254 | -0.785 | -3.836  | 1.104  | 1.00 | 20.82 | C   |
| ATOM | 1985 | N   | ASP | A | 255 | -3.433 | -5.475  | 0.108  | 1.00 | 23.61 | N   |
| ATOM | 1986 | CA  | ASP | A | 255 | -4.448 | -5.684  | -0.918 | 1.00 | 23.62 | C   |
| ATOM | 1987 | C   | ASP | A | 255 | -5.725 | -5.744  | -0.112 | 1.00 | 24.73 | C   |
| ATOM | 1988 | O   | ASP | A | 255 | -6.638 | -4.941  | -0.353 | 1.00 | 25.80 | O   |
| ATOM | 1989 | CB  | ASP | A | 255 | -4.205 | -7.026  | -1.648 | 1.00 | 24.09 | C   |
| ATOM | 1990 | CG  | ASP | A | 255 | -5.128 | -7.234  | -2.858 | 1.00 | 26.69 | C   |
| ATOM | 1991 | OD1 | ASP | A | 255 | -5.894 | -6.309  | -3.200 | 1.00 | 28.50 | O   |
| ATOM | 1992 | OD2 | ASP | A | 255 | -5.063 | -8.310  | -3.507 | 1.00 | 25.31 | O1- |
| ATOM | 1993 | N   | ASP | A | 256 | -5.645 | -6.478  | 1.009  | 1.00 | 24.05 | N   |
| ATOM | 1994 | CA  | ASP | A | 256 | -6.778 | -6.758  | 1.893  | 1.00 | 21.53 | C   |
| ATOM | 1995 | C   | ASP | A | 256 | -7.408 | -5.507  | 2.499  | 1.00 | 22.11 | C   |
| ATOM | 1996 | O   | ASP | A | 256 | -8.603 | -5.319  | 2.331  | 1.00 | 21.08 | O   |
| ATOM | 1997 | CB  | ASP | A | 256 | -6.375 | -7.720  | 3.009  | 1.00 | 19.32 | C   |
| ATOM | 1998 | CG  | ASP | A | 256 | -6.474 | -9.182  | 2.594  | 1.00 | 21.17 | C   |
| ATOM | 1999 | OD1 | ASP | A | 256 | -7.390 | -9.548  | 1.814  | 1.00 | 17.48 | O   |
| ATOM | 2000 | OD2 | ASP | A | 256 | -5.650 | -9.984  | 3.094  | 1.00 | 19.56 | O1- |
| ATOM | 2001 | N   | ARG | A | 257 | -6.624 | -4.584  | 3.069  | 1.00 | 22.19 | N   |
| ATOM | 2002 | CA  | ARG | A | 257 | -7.214 | -3.327  | 3.566  | 1.00 | 22.80 | C   |
| ATOM | 2003 | C   | ARG | A | 257 | -7.861 | -2.446  | 2.497  | 1.00 | 23.33 | C   |
| ATOM | 2004 | O   | ARG | A | 257 | -8.179 | -1.277  | 2.756  | 1.00 | 24.22 | O   |
| ATOM | 2005 | CB  | ARG | A | 257 | -6.212 | -2.474  | 4.344  | 1.00 | 23.48 | C   |
| ATOM | 2006 | CG  | ARG | A | 257 | -6.912 | -1.398  | 5.220  | 1.00 | 26.53 | C   |
| ATOM | 2007 | CD  | ARG | A | 257 | -6.367 | -1.389  | 6.660  | 1.00 | 32.02 | C   |
| ATOM | 2008 | NE  | ARG | A | 257 | -7.343 | -1.126  | 7.730  | 1.00 | 29.83 | N   |
| ATOM | 2009 | CZ  | ARG | A | 257 | -6.970 | -0.900  | 8.990  | 1.00 | 29.33 | C   |
| ATOM | 2010 | NH1 | ARG | A | 257 | -5.677 | -0.815  | 9.258  | 1.00 | 31.19 | N1+ |
| ATOM | 2011 | NH2 | ARG | A | 257 | -7.857 | -0.700  | 9.970  | 1.00 | 27.88 | N   |

|      |      |     |     |   |     |         |        |        |      |       |     |
|------|------|-----|-----|---|-----|---------|--------|--------|------|-------|-----|
| ATOM | 2012 | N   | ALA | A | 258 | -8.016  | -2.989 | 1.288  | 1.00 | 23.60 | N   |
| ATOM | 2013 | CA  | ALA | A | 258 | -8.843  | -2.381 | 0.247  | 1.00 | 19.06 | C   |
| ATOM | 2014 | C   | ALA | A | 258 | -9.853  | -3.397 | -0.273 | 1.00 | 17.21 | C   |
| ATOM | 2015 | O   | ALA | A | 258 | -11.020 | -3.095 | -0.345 | 1.00 | 16.88 | O   |
| ATOM | 2016 | CB  | ALA | A | 258 | -7.989  | -1.870 | -0.849 | 1.00 | 17.23 | C   |
| ATOM | 2017 | N   | ASP | A | 259 | -9.464  | -4.662 | -0.292 | 1.00 | 18.75 | N   |
| ATOM | 2018 | CA  | ASP | A | 259 | -10.430 | -5.768 | -0.205 | 1.00 | 21.08 | C   |
| ATOM | 2019 | C   | ASP | A | 259 | -11.253 | -5.577 | 1.090  | 1.00 | 19.96 | C   |
| ATOM | 2020 | O   | ASP | A | 259 | -12.159 | -6.365 | 1.380  | 1.00 | 20.42 | O   |
| ATOM | 2021 | CB  | ASP | A | 259 | -9.690  | -7.150 | -0.180 | 1.00 | 24.22 | C   |
| ATOM | 2022 | CG  | ASP | A | 259 | -10.169 | -8.150 | -1.288 | 1.00 | 21.26 | C   |
| ATOM | 2023 | OD1 | ASP | A | 259 | -11.075 | -7.821 | -2.076 | 1.00 | 21.43 | O   |
| ATOM | 2024 | OD2 | ASP | A | 259 | -9.634  | -9.279 | -1.364 | 1.00 | 17.32 | O1- |
| ATOM | 2025 | N   | LEU | A | 260 | -10.848 | -4.617 | 1.924  | 1.00 | 18.38 | N   |
| ATOM | 2026 | CA  | LEU | A | 260 | -11.732 | -4.087 | 2.948  | 1.00 | 19.05 | C   |
| ATOM | 2027 | C   | LEU | A | 260 | -12.198 | -2.692 | 2.561  | 1.00 | 20.78 | C   |
| ATOM | 2028 | O   | LEU | A | 260 | -13.257 | -2.581 | 1.950  | 1.00 | 22.27 | O   |
| ATOM | 2029 | CB  | LEU | A | 260 | -11.087 | -4.076 | 4.334  | 1.00 | 18.98 | C   |
| ATOM | 2030 | CG  | LEU | A | 260 | -11.986 | -4.337 | 5.564  | 1.00 | 15.64 | C   |
| ATOM | 2031 | CD1 | LEU | A | 260 | -11.913 | -3.163 | 6.525  | 1.00 | 14.71 | C   |
| ATOM | 2032 | CD2 | LEU | A | 260 | -13.418 | -4.561 | 5.153  | 1.00 | 12.68 | C   |
| ATOM | 2033 | N   | ALA | A | 261 | -11.398 | -1.651 | 2.801  | 1.00 | 19.14 | N   |
| ATOM | 2034 | CA  | ALA | A | 261 | -11.884 | -0.274 | 2.617  | 1.00 | 20.29 | C   |
| ATOM | 2035 | C   | ALA | A | 261 | -12.836 | -0.069 | 1.445  | 1.00 | 20.76 | C   |
| ATOM | 2036 | O   | ALA | A | 261 | -13.748 | 0.727  | 1.551  | 1.00 | 23.76 | O   |
| ATOM | 2037 | CB  | ALA | A | 261 | -10.738 | 0.703  | 2.506  | 1.00 | 20.41 | C   |
| ATOM | 2038 | N   | LYS | A | 262 | -12.715 | -0.870 | 0.390  | 1.00 | 21.67 | N   |
| ATOM | 2039 | CA  | LYS | A | 262 | -13.724 | -0.914 | -0.678 | 1.00 | 22.13 | C   |
| ATOM | 2040 | C   | LYS | A | 262 | -14.858 | -1.897 | -0.338 | 1.00 | 22.91 | C   |
| ATOM | 2041 | O   | LYS | A | 262 | -15.231 | -2.735 | -1.178 | 1.00 | 24.14 | O   |
| ATOM | 2042 | CB  | LYS | A | 262 | -13.079 | -1.319 | -2.018 | 1.00 | 21.14 | C   |
| ATOM | 2043 | CG  | LYS | A | 262 | -12.745 | -0.182 | -2.958 | 1.00 | 20.45 | C   |
| ATOM | 2044 | CD  | LYS | A | 262 | -13.871 | 0.032  | -3.965 | 1.00 | 22.63 | C   |
| ATOM | 2045 | CE  | LYS | A | 262 | -13.416 | 0.915  | -5.138 | 1.00 | 22.50 | C   |
| ATOM | 2046 | NZ  | LYS | A | 262 | -13.721 | 0.318  | -6.475 | 1.00 | 18.96 | N1+ |
| ATOM | 2047 | N   | TYR | A | 263 | -15.279 | -1.881 | 0.933  | 1.00 | 20.93 | N   |
| ATOM | 2048 | CA  | TYR | A | 263 | -16.547 | -2.447 | 1.416  | 1.00 | 15.95 | C   |
| ATOM | 2049 | C   | TYR | A | 263 | -17.010 | -1.449 | 2.439  | 1.00 | 14.10 | C   |
| ATOM | 2050 | O   | TYR | A | 263 | -17.949 | -0.720 | 2.178  | 1.00 | 16.17 | O   |
| ATOM | 2051 | CB  | TYR | A | 263 | -16.349 | -3.803 | 2.096  | 1.00 | 16.93 | C   |
| ATOM | 2052 | CG  | TYR | A | 263 | -17.327 | -4.107 | 3.212  | 1.00 | 14.41 | C   |
| ATOM | 2053 | CD1 | TYR | A | 263 | -18.595 | -4.556 | 2.931  | 1.00 | 17.78 | C   |
| ATOM | 2054 | CD2 | TYR | A | 263 | -17.055 | -3.743 | 4.505  | 1.00 | 15.15 | C   |
| ATOM | 2055 | CE1 | TYR | A | 263 | -19.577 | -4.581 | 3.889  | 1.00 | 17.72 | C   |
| ATOM | 2056 | CE2 | TYR | A | 263 | -18.025 | -3.763 | 5.472  | 1.00 | 16.35 | C   |
| ATOM | 2057 | CZ  | TYR | A | 263 | -19.294 | -4.157 | 5.153  | 1.00 | 17.14 | C   |
| ATOM | 2058 | OH  | TYR | A | 263 | -20.326 | -3.914 | 6.025  | 1.00 | 18.82 | O   |
| ATOM | 2059 | N   | ILE | A | 264 | -16.205 | -1.275 | 3.488  | 1.00 | 13.60 | N   |
| ATOM | 2060 | CA  | ILE | A | 264 | -16.396 | -0.224 | 4.502  | 1.00 | 13.72 | C   |
| ATOM | 2061 | C   | ILE | A | 264 | -16.916 | 0.992  | 3.801  | 1.00 | 14.67 | C   |
| ATOM | 2062 | O   | ILE | A | 264 | -18.082 | 1.333  | 3.943  | 1.00 | 16.24 | O   |
| ATOM | 2063 | CB  | ILE | A | 264 | -15.058 | 0.192  | 5.230  | 1.00 | 11.33 | C   |
| ATOM | 2064 | CG1 | ILE | A | 264 | -14.910 | -0.527 | 6.568  | 1.00 | 9.86  | C   |
| ATOM | 2065 | CG2 | ILE | A | 264 | -15.057 | 1.676  | 5.551  | 1.00 | 12.03 | C   |
| ATOM | 2066 | CD1 | ILE | A | 264 | -13.924 | 0.134  | 7.518  | 1.00 | 8.24  | C   |
| ATOM | 2067 | N   | CYS | A | 265 | -16.146 | 1.431  | 2.817  | 1.00 | 18.20 | N   |
| ATOM | 2068 | CA  | CYS | A | 265 | -16.409 | 2.706  | 2.184  | 1.00 | 21.00 | C   |
| ATOM | 2069 | C   | CYS | A | 265 | -17.183 | 2.683  | 0.863  | 1.00 | 20.34 | C   |
| ATOM | 2070 | O   | CYS | A | 265 | -17.164 | 3.648  | 0.104  | 1.00 | 18.15 | O   |
| ATOM | 2071 | CB  | CYS | A | 265 | -15.131 | 3.508  | 2.016  | 1.00 | 18.44 | C   |
| ATOM | 2072 | SG  | CYS | A | 265 | -15.717 | 5.147  | 1.584  | 1.00 | 24.42 | S   |
| ATOM | 2073 | N   | GLU | A | 266 | -17.927 | 1.612  | 0.630  | 1.00 | 22.55 | N   |
| ATOM | 2074 | CA  | GLU | A | 266 | -19.044 | 1.668  | -0.305 | 1.00 | 25.71 | C   |
| ATOM | 2075 | C   | GLU | A | 266 | -20.359 | 1.649  | 0.507  | 1.00 | 25.99 | C   |
| ATOM | 2076 | O   | GLU | A | 266 | -21.401 | 2.132  | 0.031  | 1.00 | 24.57 | O   |
| ATOM | 2077 | CB  | GLU | A | 266 | -18.982 | 0.486  | -1.306 | 1.00 | 30.26 | C   |
| ATOM | 2078 | CG  | GLU | A | 266 | -18.126 | 0.746  | -2.589 | 1.00 | 33.40 | C   |
| ATOM | 2079 | CD  | GLU | A | 266 | -18.430 | -0.224 | -3.755 | 1.00 | 33.38 | C   |
| ATOM | 2080 | OE1 | GLU | A | 266 | -19.340 | 0.064  | -4.569 | 1.00 | 34.65 | O   |
| ATOM | 2081 | OE2 | GLU | A | 266 | -17.702 | -1.226 | -3.918 | 1.00 | 31.65 | O1- |
| ATOM | 2082 | N   | ASN | A | 267 | -20.231 | 1.304  | 1.792  | 1.00 | 24.11 | N   |

|      |      |     |     |   |     |         |        |        |      |       |     |
|------|------|-----|-----|---|-----|---------|--------|--------|------|-------|-----|
| ATOM | 2083 | CA  | ASN | A | 267 | -21.367 | 1.133  | 2.693  | 1.00 | 24.75 | C   |
| ATOM | 2084 | C   | ASN | A | 267 | -21.562 | 2.304  | 3.675  | 1.00 | 25.96 | C   |
| ATOM | 2085 | O   | ASN | A | 267 | -22.551 | 2.367  | 4.425  | 1.00 | 24.17 | O   |
| ATOM | 2086 | CB  | ASN | A | 267 | -21.201 | -0.171 | 3.465  | 1.00 | 25.26 | C   |
| ATOM | 2087 | CG  | ASN | A | 267 | -21.552 | -1.388 | 2.630  | 1.00 | 26.30 | C   |
| ATOM | 2088 | ND2 | ASN | A | 267 | -21.767 | -2.527 | 3.293  | 1.00 | 23.38 | N   |
| ATOM | 2089 | OD1 | ASN | A | 267 | -21.602 | -1.314 | 1.394  | 1.00 | 28.38 | O   |
| ATOM | 2090 | N   | GLN | A | 268 | -20.543 | 3.150  | 3.756  | 1.00 | 27.51 | N   |
| ATOM | 2091 | CA  | GLN | A | 268 | -20.619 | 4.455  | 4.422  | 1.00 | 26.43 | C   |
| ATOM | 2092 | C   | GLN | A | 268 | -21.731 | 4.680  | 5.469  | 1.00 | 25.52 | C   |
| ATOM | 2093 | O   | GLN | A | 268 | -21.432 | 5.026  | 6.604  | 1.00 | 23.74 | O   |
| ATOM | 2094 | CB  | GLN | A | 268 | -20.693 | 5.552  | 3.354  | 1.00 | 24.02 | C   |
| ATOM | 2095 | CG  | GLN | A | 268 | -19.418 | 6.340  | 3.149  | 1.00 | 20.44 | C   |
| ATOM | 2096 | CD  | GLN | A | 268 | -19.711 | 7.673  | 2.493  | 1.00 | 23.29 | C   |
| ATOM | 2097 | NE2 | GLN | A | 268 | -18.762 | 8.607  | 2.568  | 1.00 | 22.63 | N   |
| ATOM | 2098 | OE1 | GLN | A | 268 | -20.807 | 7.873  | 1.949  | 1.00 | 24.24 | O   |
| ATOM | 2099 | N   | ASP | A | 269 | -22.993 | 4.648  | 5.054  | 1.00 | 25.35 | N   |
| ATOM | 2100 | CA  | ASP | A | 269 | -24.064 | 5.203  | 5.882  | 1.00 | 26.24 | C   |
| ATOM | 2101 | C   | ASP | A | 269 | -24.667 | 4.170  | 6.833  | 1.00 | 28.27 | C   |
| ATOM | 2102 | O   | ASP | A | 269 | -25.243 | 4.533  | 7.873  | 1.00 | 29.26 | O   |
| ATOM | 2103 | CB  | ASP | A | 269 | -25.180 | 5.803  | 5.009  | 1.00 | 27.91 | C   |
| ATOM | 2104 | CG  | ASP | A | 269 | -25.889 | 4.753  | 4.153  | 1.00 | 29.64 | C   |
| ATOM | 2105 | OD1 | ASP | A | 269 | -25.178 | 3.900  | 3.565  | 1.00 | 30.12 | O   |
| ATOM | 2106 | OD2 | ASP | A | 269 | -27.151 | 4.754  | 4.103  | 1.00 | 29.00 | O1- |
| ATOM | 2107 | N   | SER | A | 270 | -24.536 | 2.886  | 6.501  | 1.00 | 27.48 | N   |
| ATOM | 2108 | CA  | SER | A | 270 | -24.993 | 1.847  | 7.413  | 1.00 | 26.75 | C   |
| ATOM | 2109 | C   | SER | A | 270 | -23.949 | 1.519  | 8.504  | 1.00 | 26.55 | C   |
| ATOM | 2110 | O   | SER | A | 270 | -24.139 | 0.582  | 9.286  | 1.00 | 26.34 | O   |
| ATOM | 2111 | CB  | SER | A | 270 | -25.359 | 0.589  | 6.623  | 1.00 | 28.19 | C   |
| ATOM | 2112 | OG  | SER | A | 270 | -24.224 | 0.037  | 5.957  | 1.00 | 30.87 | O   |
| ATOM | 2113 | N   | ILE | A | 271 | -22.895 | 2.329  | 8.614  | 1.00 | 25.27 | N   |
| ATOM | 2114 | CA  | ILE | A | 271 | -21.741 | 1.967  | 9.420  | 1.00 | 24.11 | C   |
| ATOM | 2115 | C   | ILE | A | 271 | -21.253 | 3.034  | 10.393 | 1.00 | 25.93 | C   |
| ATOM | 2116 | O   | ILE | A | 271 | -21.228 | 2.784  | 11.593 | 1.00 | 27.16 | O   |
| ATOM | 2117 | CB  | ILE | A | 271 | -20.578 | 1.539  | 8.535  | 1.00 | 25.05 | C   |
| ATOM | 2118 | CG1 | ILE | A | 271 | -20.832 | 0.113  | 8.013  | 1.00 | 27.97 | C   |
| ATOM | 2119 | CG2 | ILE | A | 271 | -19.278 | 1.600  | 9.305  | 1.00 | 24.66 | C   |
| ATOM | 2120 | CD1 | ILE | A | 271 | -19.661 | -0.523 | 7.232  | 1.00 | 23.58 | C   |
| ATOM | 2121 | N   | SER | A | 272 | -20.749 | 4.167  | 9.908  | 1.00 | 27.76 | N   |
| ATOM | 2122 | CA  | SER | A | 272 | -20.329 | 5.238  | 10.836 | 1.00 | 28.74 | C   |
| ATOM | 2123 | C   | SER | A | 272 | -20.165 | 6.631  | 10.227 | 1.00 | 27.74 | C   |
| ATOM | 2124 | O   | SER | A | 272 | -19.123 | 7.259  | 10.418 | 1.00 | 26.72 | O   |
| ATOM | 2125 | CB  | SER | A | 272 | -19.018 | 4.837  | 11.530 | 1.00 | 30.16 | C   |
| ATOM | 2126 | OG  | SER | A | 272 | -18.380 | 5.901  | 12.239 | 1.00 | 27.56 | O   |
| ATOM | 2127 | N   | SER | A | 273 | -21.257 | 7.182  | 9.701  | 1.00 | 27.40 | N   |
| ATOM | 2128 | CA  | SER | A | 273 | -21.236 | 8.458  | 8.970  | 1.00 | 26.73 | C   |
| ATOM | 2129 | C   | SER | A | 273 | -19.842 | 9.066  | 8.643  | 1.00 | 25.15 | C   |
| ATOM | 2130 | O   | SER | A | 273 | -19.475 | 9.204  | 7.468  | 1.00 | 20.82 | O   |
| ATOM | 2131 | CB  | SER | A | 273 | -22.110 | 9.495  | 9.714  | 1.00 | 25.04 | C   |
| ATOM | 2132 | OG  | SER | A | 273 | -21.417 | 10.725 | 9.872  | 1.00 | 24.31 | O   |
| ATOM | 2133 | N   | LYS | A | 274 | -19.104 | 9.433  | 9.697  | 1.00 | 24.05 | N   |
| ATOM | 2134 | CA  | LYS | A | 274 | -17.875 | 10.230 | 9.625  | 1.00 | 24.74 | C   |
| ATOM | 2135 | C   | LYS | A | 274 | -16.764 | 9.750  | 8.705  | 1.00 | 22.58 | C   |
| ATOM | 2136 | O   | LYS | A | 274 | -15.721 | 10.376 | 8.669  | 1.00 | 21.30 | O   |
| ATOM | 2137 | CB  | LYS | A | 274 | -17.260 | 10.431 | 11.024 | 1.00 | 25.80 | C   |
| ATOM | 2138 | CG  | LYS | A | 274 | -18.220 | 10.937 | 12.072 | 1.00 | 29.40 | C   |
| ATOM | 2139 | CD  | LYS | A | 274 | -18.241 | 12.437 | 12.131 | 1.00 | 33.71 | C   |
| ATOM | 2140 | CE  | LYS | A | 274 | -18.315 | 12.928 | 13.589 | 1.00 | 34.96 | C   |
| ATOM | 2141 | NZ  | LYS | A | 274 | -17.356 | 14.082 | 13.815 | 1.00 | 34.17 | N1+ |
| ATOM | 2142 | N   | LEU | A | 275 | -16.941 | 8.657  | 7.970  | 1.00 | 23.57 | N   |
| ATOM | 2143 | CA  | LEU | A | 275 | -15.937 | 8.325  | 6.959  | 1.00 | 23.18 | C   |
| ATOM | 2144 | C   | LEU | A | 275 | -16.330 | 8.834  | 5.585  | 1.00 | 22.54 | C   |
| ATOM | 2145 | O   | LEU | A | 275 | -16.224 | 8.104  | 4.610  | 1.00 | 21.30 | O   |
| ATOM | 2146 | CB  | LEU | A | 275 | -15.652 | 6.828  | 6.872  | 1.00 | 21.39 | C   |
| ATOM | 2147 | CG  | LEU | A | 275 | -16.319 | 5.772  | 7.741  | 1.00 | 23.35 | C   |
| ATOM | 2148 | CD1 | LEU | A | 275 | -17.580 | 5.221  | 7.072  | 1.00 | 23.95 | C   |
| ATOM | 2149 | CD2 | LEU | A | 275 | -15.319 | 4.663  | 7.986  | 1.00 | 22.41 | C   |
| ATOM | 2150 | N   | LYS | A | 276 | -16.828 | 10.073 | 5.514  | 1.00 | 25.95 | N   |
| ATOM | 2151 | CA  | LYS | A | 276 | -16.886 | 10.830 | 4.247  | 1.00 | 26.73 | C   |
| ATOM | 2152 | C   | LYS | A | 276 | -15.478 | 11.187 | 3.799  | 1.00 | 25.18 | C   |
| ATOM | 2153 | O   | LYS | A | 276 | -14.865 | 10.434 | 3.052  | 1.00 | 25.22 | O   |

|      |      |     |     |   |     |         |        |        |      |       |     |
|------|------|-----|-----|---|-----|---------|--------|--------|------|-------|-----|
| ATOM | 2154 | CB  | LYS | A | 276 | -17.710 | 12.129 | 4.402  | 1.00 | 29.83 | C   |
| ATOM | 2155 | CG  | LYS | A | 276 | -17.702 | 12.805 | 5.801  | 1.00 | 30.45 | C   |
| ATOM | 2156 | CD  | LYS | A | 276 | -16.755 | 14.005 | 5.874  | 1.00 | 30.09 | C   |
| ATOM | 2157 | CE  | LYS | A | 276 | -16.974 | 14.966 | 4.712  | 1.00 | 31.30 | C   |
| ATOM | 2158 | NZ  | LYS | A | 276 | -18.160 | 15.877 | 4.882  | 1.00 | 29.48 | N1+ |
| ATOM | 2159 | N   | GLU | A | 277 | -14.899 | 12.172 | 4.482  | 1.00 | 25.27 | N   |
| ATOM | 2160 | CA  | GLU | A | 277 | -13.552 | 12.674 | 4.211  | 1.00 | 26.60 | C   |
| ATOM | 2161 | C   | GLU | A | 277 | -12.640 | 11.674 | 3.545  | 1.00 | 25.74 | C   |
| ATOM | 2162 | O   | GLU | A | 277 | -12.369 | 11.752 | 2.348  | 1.00 | 25.45 | O   |
| ATOM | 2163 | CB  | GLU | A | 277 | -12.899 | 13.131 | 5.511  | 1.00 | 26.87 | C   |
| ATOM | 2164 | CG  | GLU | A | 277 | -13.175 | 14.597 | 5.841  | 1.00 | 31.72 | C   |
| ATOM | 2165 | CD  | GLU | A | 277 | -12.559 | 15.583 | 4.830  | 1.00 | 30.45 | C   |
| ATOM | 2166 | OE1 | GLU | A | 277 | -13.198 | 15.870 | 3.787  | 1.00 | 27.15 | O   |
| ATOM | 2167 | OE2 | GLU | A | 277 | -11.473 | 16.133 | 5.136  | 1.00 | 30.36 | O1- |
| ATOM | 2168 | N   | CYS | A | 278 | -12.396 | 10.601 | 4.270  | 1.00 | 26.80 | N   |
| ATOM | 2169 | CA  | CYS | A | 278 | -11.438 | 9.582  | 3.859  | 1.00 | 27.12 | C   |
| ATOM | 2170 | C   | CYS | A | 278 | -12.143 | 8.579  | 2.975  | 1.00 | 23.38 | C   |
| ATOM | 2171 | O   | CYS | A | 278 | -12.167 | 7.391  | 3.233  | 1.00 | 24.65 | O   |
| ATOM | 2172 | CB  | CYS | A | 278 | -10.871 | 8.920  | 5.104  | 1.00 | 31.72 | C   |
| ATOM | 2173 | SG  | CYS | A | 278 | -11.643 | 9.660  | 6.586  | 1.00 | 33.14 | S   |
| ATOM | 2174 | N   | CYS | A | 279 | -12.574 | 9.086  | 1.842  | 1.00 | 21.92 | N   |
| ATOM | 2175 | CA  | CYS | A | 279 | -13.315 | 8.339  | 0.856  | 1.00 | 20.79 | C   |
| ATOM | 2176 | C   | CYS | A | 279 | -13.460 | 9.359  | -0.255 | 1.00 | 21.27 | C   |
| ATOM | 2177 | O   | CYS | A | 279 | -13.962 | 9.073  | -1.350 | 1.00 | 22.78 | O   |
| ATOM | 2178 | CB  | CYS | A | 279 | -14.661 | 7.929  | 1.439  | 1.00 | 19.99 | C   |
| ATOM | 2179 | SG  | CYS | A | 279 | -14.510 | 6.478  | 2.522  | 1.00 | 21.12 | S   |
| ATOM | 2180 | N   | GLU | A | 280 | -13.143 | 10.594 | 0.107  | 1.00 | 18.93 | N   |
| ATOM | 2181 | CA  | GLU | A | 280 | -12.521 | 11.517 | -0.799 | 1.00 | 19.87 | C   |
| ATOM | 2182 | C   | GLU | A | 280 | -11.046 | 11.586 | -0.419 | 1.00 | 21.37 | C   |
| ATOM | 2183 | O   | GLU | A | 280 | -10.570 | 12.645 | -0.028 | 1.00 | 22.62 | O   |
| ATOM | 2184 | CB  | GLU | A | 280 | -13.152 | 12.896 | -0.661 | 1.00 | 19.56 | C   |
| ATOM | 2185 | CG  | GLU | A | 280 | -14.562 | 12.867 | -0.153 | 1.00 | 22.77 | C   |
| ATOM | 2186 | CD  | GLU | A | 280 | -15.551 | 12.438 | -1.207 | 1.00 | 24.09 | C   |
| ATOM | 2187 | OE1 | GLU | A | 280 | -15.638 | 11.225 | -1.511 | 1.00 | 22.38 | O   |
| ATOM | 2188 | OE2 | GLU | A | 280 | -16.260 | 13.325 | -1.723 | 1.00 | 26.29 | O1- |
| ATOM | 2189 | N   | LYS | A | 281 | -10.362 | 10.437 | -0.413 | 1.00 | 21.75 | N   |
| ATOM | 2190 | CA  | LYS | A | 281 | -8.896  | 10.399 | -0.281 | 1.00 | 22.31 | C   |
| ATOM | 2191 | C   | LYS | A | 281 | -8.246  | 9.170  | -0.941 | 1.00 | 23.66 | C   |
| ATOM | 2192 | O   | LYS | A | 281 | -8.367  | 8.041  | -0.431 | 1.00 | 25.63 | O   |
| ATOM | 2193 | CB  | LYS | A | 281 | -8.474  | 10.459 | 1.188  | 1.00 | 19.47 | C   |
| ATOM | 2194 | CG  | LYS | A | 281 | -8.113  | 11.852 | 1.682  | 1.00 | 21.76 | C   |
| ATOM | 2195 | CD  | LYS | A | 281 | -8.906  | 12.198 | 2.952  | 1.00 | 25.79 | C   |
| ATOM | 2196 | CE  | LYS | A | 281 | -8.282  | 13.351 | 3.761  | 1.00 | 27.84 | C   |
| ATOM | 2197 | NZ  | LYS | A | 281 | -7.158  | 12.950 | 4.670  | 1.00 | 23.24 | N1+ |
| ATOM | 2198 | N   | PRO | A | 282 | -7.451  | 9.396  | -2.015 | 1.00 | 20.78 | N   |
| ATOM | 2199 | CA  | PRO | A | 282 | -6.604  | 8.401  | -2.683 | 1.00 | 19.52 | C   |
| ATOM | 2200 | C   | PRO | A | 282 | -6.214  | 7.216  | -1.818 | 1.00 | 19.87 | C   |
| ATOM | 2201 | O   | PRO | A | 282 | -5.362  | 7.365  | -0.939 | 1.00 | 19.82 | O   |
| ATOM | 2202 | CB  | PRO | A | 282 | -5.376  | 9.210  | -3.100 | 1.00 | 16.20 | C   |
| ATOM | 2203 | CG  | PRO | A | 282 | -5.586  | 10.592 | -2.507 | 1.00 | 15.71 | C   |
| ATOM | 2204 | CD  | PRO | A | 282 | -7.052  | 10.740 | -2.438 | 1.00 | 17.15 | C   |
| ATOM | 2205 | N   | LEU | A | 283 | -6.642  | 6.027  | -2.254 | 1.00 | 20.57 | N   |
| ATOM | 2206 | CA  | LEU | A | 283 | -6.610  | 4.787  | -1.461 | 1.00 | 20.98 | C   |
| ATOM | 2207 | C   | LEU | A | 283 | -5.739  | 4.913  | -0.252 | 1.00 | 20.62 | C   |
| ATOM | 2208 | O   | LEU | A | 283 | -6.176  | 5.479  | 0.723  | 1.00 | 18.64 | O   |
| ATOM | 2209 | CB  | LEU | A | 283 | -6.147  | 3.585  | -2.288 | 1.00 | 22.23 | C   |
| ATOM | 2210 | CG  | LEU | A | 283 | -6.130  | 2.292  | -1.452 | 1.00 | 23.90 | C   |
| ATOM | 2211 | CD1 | LEU | A | 283 | -7.217  | 1.299  | -1.964 | 1.00 | 22.21 | C   |
| ATOM | 2212 | CD2 | LEU | A | 283 | -4.730  | 1.673  | -1.500 | 1.00 | 20.45 | C   |
| ATOM | 2213 | N   | LEU | A | 284 | -4.471  | 4.536  | -0.395 | 1.00 | 22.99 | N   |
| ATOM | 2214 | CA  | LEU | A | 284 | -3.396  | 4.918  | 0.519  | 1.00 | 26.73 | C   |
| ATOM | 2215 | C   | LEU | A | 284 | -3.912  | 5.607  | 1.803  | 1.00 | 28.33 | C   |
| ATOM | 2216 | O   | LEU | A | 284 | -4.326  | 4.906  | 2.739  | 1.00 | 28.88 | O   |
| ATOM | 2217 | CB  | LEU | A | 284 | -2.385  | 5.825  | -0.225 | 1.00 | 28.31 | C   |
| ATOM | 2218 | CG  | LEU | A | 284 | -1.765  | 5.434  | -1.595 | 1.00 | 26.94 | C   |
| ATOM | 2219 | CD1 | LEU | A | 284 | -1.303  | 6.690  | -2.364 | 1.00 | 20.85 | C   |
| ATOM | 2220 | CD2 | LEU | A | 284 | -0.594  | 4.469  | -1.384 | 1.00 | 26.30 | C   |
| ATOM | 2221 | N   | GLU | A | 285 | -4.223  | 6.906  | 1.683  | 1.00 | 28.79 | N   |
| ATOM | 2222 | CA  | GLU | A | 285 | -4.614  | 7.759  | 2.825  | 1.00 | 28.34 | C   |
| ATOM | 2223 | C   | GLU | A | 285 | -6.001  | 7.475  | 3.396  | 1.00 | 26.33 | C   |
| ATOM | 2224 | O   | GLU | A | 285 | -6.293  | 7.857  | 4.516  | 1.00 | 28.65 | O   |



|      |      |     |     |   |     |         |        |        |      |       |     |
|------|------|-----|-----|---|-----|---------|--------|--------|------|-------|-----|
| ATOM | 2225 | CB  | GLU | A | 285 | -4.542  | 9.247  | 2.462  | 1.00 | 28.57 | C   |
| ATOM | 2226 | CG  | GLU | A | 285 | -3.144  | 9.754  | 2.142  | 1.00 | 29.88 | C   |
| ATOM | 2227 | CD  | GLU | A | 285 | -3.105  | 10.581 | 0.870  | 1.00 | 30.17 | C   |
| ATOM | 2228 | OE1 | GLU | A | 285 | -3.483  | 11.778 | 0.920  | 1.00 | 29.25 | O   |
| ATOM | 2229 | OE2 | GLU | A | 285 | -2.744  | 10.009 | -0.185 | 1.00 | 28.46 | O1- |
| ATOM | 2230 | N   | LYS | A | 286 | -6.880  | 6.870  | 2.617  | 1.00 | 26.40 | N   |
| ATOM | 2231 | CA  | LYS | A | 286 | -8.030  | 6.193  | 3.204  | 1.00 | 26.58 | C   |
| ATOM | 2232 | C   | LYS | A | 286 | -7.525  | 5.430  | 4.440  | 1.00 | 24.48 | C   |
| ATOM | 2233 | O   | LYS | A | 286 | -7.732  | 5.868  | 5.567  | 1.00 | 25.77 | O   |
| ATOM | 2234 | CB  | LYS | A | 286 | -8.650  | 5.179  | 2.218  | 1.00 | 27.97 | C   |
| ATOM | 2235 | CG  | LYS | A | 286 | -9.914  | 5.578  | 1.425  | 1.00 | 19.93 | C   |
| ATOM | 2236 | CD  | LYS | A | 286 | -10.135 | 4.498  | 0.364  | 1.00 | 19.31 | C   |
| ATOM | 2237 | CE  | LYS | A | 286 | -11.548 | 4.386  | -0.099 | 1.00 | 16.08 | C   |
| ATOM | 2238 | NZ  | LYS | A | 286 | -12.013 | 5.632  | -0.734 | 1.00 | 16.67 | N1+ |
| ATOM | 2239 | N   | SER | A | 287 | -6.716  | 4.406  | 4.244  | 1.00 | 19.71 | N   |
| ATOM | 2240 | CA  | SER | A | 287 | -6.403  | 3.545  | 5.359  | 1.00 | 19.25 | C   |
| ATOM | 2241 | C   | SER | A | 287 | -5.478  | 4.164  | 6.423  | 1.00 | 19.83 | C   |
| ATOM | 2242 | O   | SER | A | 287 | -4.917  | 3.451  | 7.252  | 1.00 | 19.56 | O   |
| ATOM | 2243 | CB  | SER | A | 287 | -5.832  | 2.230  | 4.832  | 1.00 | 22.16 | C   |
| ATOM | 2244 | OG  | SER | A | 287 | -6.709  | 1.646  | 3.874  | 1.00 | 24.16 | O   |
| ATOM | 2245 | N   | HIS | A | 288 | -5.335  | 5.486  | 6.427  | 1.00 | 20.41 | N   |
| ATOM | 2246 | CA  | HIS | A | 288 | -4.825  | 6.194  | 7.611  | 1.00 | 23.21 | C   |
| ATOM | 2247 | C   | HIS | A | 288 | -5.564  | 7.515  | 7.785  | 1.00 | 24.49 | C   |
| ATOM | 2248 | O   | HIS | A | 288 | -4.955  | 8.582  | 7.929  | 1.00 | 24.42 | O   |
| ATOM | 2249 | CB  | HIS | A | 288 | -3.315  | 6.446  | 7.531  | 1.00 | 23.44 | C   |
| ATOM | 2250 | CG  | HIS | A | 288 | -2.712  | 6.985  | 8.800  | 1.00 | 24.13 | C   |
| ATOM | 2251 | CD2 | HIS | A | 288 | -2.834  | 8.190  | 9.411  | 1.00 | 22.19 | C   |
| ATOM | 2252 | ND1 | HIS | A | 288 | -1.809  | 6.267  | 9.556  | 1.00 | 25.67 | N   |
| ATOM | 2253 | CE1 | HIS | A | 288 | -1.401  | 7.001  | 10.576 | 1.00 | 23.98 | C   |
| ATOM | 2254 | NE2 | HIS | A | 288 | -2.009  | 8.172  | 10.512 | 1.00 | 26.26 | N   |
| ATOM | 2255 | N   | CYS | A | 289 | -6.865  | 7.447  | 7.540  | 1.00 | 25.16 | N   |
| ATOM | 2256 | CA  | CYS | A | 289 | -7.819  | 8.301  | 8.209  | 1.00 | 26.57 | C   |
| ATOM | 2257 | C   | CYS | A | 289 | -8.701  | 7.377  | 9.055  | 1.00 | 25.76 | C   |
| ATOM | 2258 | O   | CYS | A | 289 | -9.060  | 7.710  | 10.192 | 1.00 | 26.10 | O   |
| ATOM | 2259 | CB  | CYS | A | 289 | -8.716  | 9.020  | 7.218  | 1.00 | 26.87 | C   |
| ATOM | 2260 | SG  | CYS | A | 289 | -10.336 | 9.115  | 8.027  | 1.00 | 35.83 | S   |
| ATOM | 2261 | N   | ILE | A | 290 | -9.231  | 6.354  | 8.381  | 1.00 | 23.01 | N   |
| ATOM | 2262 | CA  | ILE | A | 290 | -9.982  | 5.262  | 8.996  | 1.00 | 20.80 | C   |
| ATOM | 2263 | C   | ILE | A | 290 | -9.125  | 4.551  | 10.043 | 1.00 | 21.11 | C   |
| ATOM | 2264 | O   | ILE | A | 290 | -9.551  | 4.335  | 11.168 | 1.00 | 22.48 | O   |
| ATOM | 2265 | CB  | ILE | A | 290 | -10.432 | 4.241  | 7.920  | 1.00 | 17.33 | C   |
| ATOM | 2266 | CG1 | ILE | A | 290 | -11.770 | 4.670  | 7.312  | 1.00 | 16.61 | C   |
| ATOM | 2267 | CG2 | ILE | A | 290 | -10.558 | 2.866  | 8.514  | 1.00 | 19.50 | C   |
| ATOM | 2268 | CD1 | ILE | A | 290 | -11.867 | 4.462  | 5.808  | 1.00 | 11.81 | C   |
| ATOM | 2269 | N   | ALA | A | 291 | -7.920  | 4.156  | 9.665  | 1.00 | 20.66 | N   |
| ATOM | 2270 | CA  | ALA | A | 291 | -6.948  | 3.747  | 10.664 | 1.00 | 20.97 | C   |
| ATOM | 2271 | C   | ALA | A | 291 | -6.893  | 4.911  | 11.619 | 1.00 | 19.91 | C   |
| ATOM | 2272 | O   | ALA | A | 291 | -7.270  | 6.008  | 11.249 | 1.00 | 18.39 | O   |
| ATOM | 2273 | CB  | ALA | A | 291 | -5.583  | 3.518  | 10.024 | 1.00 | 21.17 | C   |
| ATOM | 2274 | N   | GLU | A | 292 | -6.302  | 4.720  | 12.784 | 1.00 | 21.16 | N   |
| ATOM | 2275 | CA  | GLU | A | 292 | -6.572  | 5.631  | 13.881 | 1.00 | 24.55 | C   |
| ATOM | 2276 | C   | GLU | A | 292 | -6.249  | 7.130  | 13.695 | 1.00 | 26.59 | C   |
| ATOM | 2277 | O   | GLU | A | 292 | -5.185  | 7.622  | 14.100 | 1.00 | 27.80 | O   |
| ATOM | 2278 | CB  | GLU | A | 292 | -5.962  | 5.076  | 15.170 | 1.00 | 24.02 | C   |
| ATOM | 2279 | CG  | GLU | A | 292 | -6.808  | 3.952  | 15.736 | 1.00 | 23.17 | C   |
| ATOM | 2280 | CD  | GLU | A | 292 | -6.260  | 3.354  | 17.010 | 1.00 | 25.80 | C   |
| ATOM | 2281 | OE1 | GLU | A | 292 | -6.050  | 4.132  | 17.989 | 1.00 | 23.17 | O   |
| ATOM | 2282 | OE2 | GLU | A | 292 | -6.112  | 2.098  | 17.040 | 1.00 | 20.76 | O1- |
| ATOM | 2283 | N   | VAL | A | 293 | -7.121  | 7.800  | 12.940 | 1.00 | 26.75 | N   |
| ATOM | 2284 | CA  | VAL | A | 293 | -7.593  | 9.139  | 13.260 | 1.00 | 26.08 | C   |
| ATOM | 2285 | C   | VAL | A | 293 | -9.082  | 9.127  | 12.906 | 1.00 | 26.05 | C   |
| ATOM | 2286 | O   | VAL | A | 293 | -9.506  | 9.564  | 11.824 | 1.00 | 23.87 | O   |
| ATOM | 2287 | CB  | VAL | A | 293 | -6.824  | 10.236 | 12.489 | 1.00 | 26.52 | C   |
| ATOM | 2288 | CG1 | VAL | A | 293 | -7.586  | 11.572 | 12.540 | 1.00 | 23.04 | C   |
| ATOM | 2289 | CG2 | VAL | A | 293 | -5.434  | 10.417 | 13.116 | 1.00 | 25.28 | C   |
| ATOM | 2290 | N   | GLU | A | 294 | -9.845  | 8.465  | 13.774 | 1.00 | 26.28 | N   |
| ATOM | 2291 | CA  | GLU | A | 294 | -11.252 | 8.203  | 13.506 | 1.00 | 27.28 | C   |
| ATOM | 2292 | C   | GLU | A | 294 | -12.157 | 8.786  | 14.564 | 1.00 | 25.18 | C   |
| ATOM | 2293 | O   | GLU | A | 294 | -12.655 | 8.059  | 15.407 | 1.00 | 25.83 | O   |
| ATOM | 2294 | CB  | GLU | A | 294 | -11.509 | 6.688  | 13.403 | 1.00 | 29.38 | C   |
| ATOM | 2295 | CG  | GLU | A | 294 | -11.930 | 6.202  | 12.013 | 1.00 | 27.11 | C   |

|      |      |     |     |   |     |         |        |        |      |       |     |
|------|------|-----|-----|---|-----|---------|--------|--------|------|-------|-----|
| ATOM | 2296 | CD  | GLU | A | 294 | -12.826 | 7.200  | 11.307 | 1.00 | 28.00 | C   |
| ATOM | 2297 | OE1 | GLU | A | 294 | -12.301 | 8.229  | 10.798 | 1.00 | 24.31 | O   |
| ATOM | 2298 | OE2 | GLU | A | 294 | -14.056 | 6.961  | 11.289 | 1.00 | 26.88 | O1- |
| ATOM | 2299 | N   | ASN | A | 295 | -12.381 | 10.093 | 14.525 | 1.00 | 23.72 | N   |
| ATOM | 2300 | CA  | ASN | A | 295 | -13.248 | 10.720 | 15.510 | 1.00 | 21.83 | C   |
| ATOM | 2301 | C   | ASN | A | 295 | -14.523 | 9.893  | 15.424 | 1.00 | 18.95 | C   |
| ATOM | 2302 | O   | ASN | A | 295 | -14.920 | 9.519  | 14.325 | 1.00 | 16.49 | O   |
| ATOM | 2303 | CB  | ASN | A | 295 | -13.476 | 12.217 | 15.175 | 1.00 | 23.98 | C   |
| ATOM | 2304 | CG  | ASN | A | 295 | -13.935 | 13.068 | 16.404 | 1.00 | 27.75 | C   |
| ATOM | 2305 | ND2 | ASN | A | 295 | -13.404 | 12.768 | 17.605 | 1.00 | 26.54 | N   |
| ATOM | 2306 | OD1 | ASN | A | 295 | -14.706 | 14.027 | 16.242 | 1.00 | 27.01 | O   |
| ATOM | 2307 | N   | ASP | A | 296 | -14.757 | 9.198  | 16.536 | 1.00 | 19.63 | N   |
| ATOM | 2308 | CA  | ASP | A | 296 | -15.900 | 8.306  | 16.708 | 1.00 | 18.42 | C   |
| ATOM | 2309 | C   | ASP | A | 296 | -17.117 | 9.146  | 16.474 | 1.00 | 18.35 | C   |
| ATOM | 2310 | O   | ASP | A | 296 | -17.158 | 10.280 | 16.940 | 1.00 | 19.40 | O   |
| ATOM | 2311 | CB  | ASP | A | 296 | -16.006 | 7.790  | 18.155 | 1.00 | 17.52 | C   |
| ATOM | 2312 | CG  | ASP | A | 296 | -14.676 | 7.708  | 18.867 | 1.00 | 16.66 | C   |
| ATOM | 2313 | OD1 | ASP | A | 296 | -14.270 | 8.699  | 19.506 | 1.00 | 16.57 | O   |
| ATOM | 2314 | OD2 | ASP | A | 296 | -14.096 | 6.609  | 18.887 | 1.00 | 17.73 | O1- |
| ATOM | 2315 | N   | GLU | A | 297 | -18.180 | 8.541  | 15.963 | 1.00 | 20.63 | N   |
| ATOM | 2316 | CA  | GLU | A | 297 | -19.492 | 9.152  | 16.137 | 1.00 | 22.06 | C   |
| ATOM | 2317 | C   | GLU | A | 297 | -20.176 | 8.612  | 17.385 | 1.00 | 20.95 | C   |
| ATOM | 2318 | O   | GLU | A | 297 | -21.015 | 7.728  | 17.316 | 1.00 | 17.62 | O   |
| ATOM | 2319 | CB  | GLU | A | 297 | -20.393 | 8.974  | 14.910 | 1.00 | 22.28 | C   |
| ATOM | 2320 | CG  | GLU | A | 297 | -21.083 | 10.290 | 14.487 | 1.00 | 19.78 | C   |
| ATOM | 2321 | CD  | GLU | A | 297 | -22.552 | 10.114 | 14.097 | 1.00 | 17.46 | C   |
| ATOM | 2322 | OE1 | GLU | A | 297 | -23.107 | 9.029  | 14.331 | 1.00 | 18.89 | O   |
| ATOM | 2323 | OE2 | GLU | A | 297 | -23.177 | 11.082 | 13.618 | 1.00 | 17.10 | O1- |
| ATOM | 2324 | N   | MET | A | 298 | -19.640 | 9.016  | 18.530 | 1.00 | 21.96 | N   |
| ATOM | 2325 | CA  | MET | A | 298 | -20.458 | 9.312  | 19.694 | 1.00 | 23.40 | C   |
| ATOM | 2326 | C   | MET | A | 298 | -21.712 | 10.057 | 19.184 | 1.00 | 25.29 | C   |
| ATOM | 2327 | O   | MET | A | 298 | -21.650 | 10.760 | 18.154 | 1.00 | 23.28 | O   |
| ATOM | 2328 | CB  | MET | A | 298 | -19.659 | 10.192 | 20.679 | 1.00 | 23.66 | C   |
| ATOM | 2329 | CG  | MET | A | 298 | -19.890 | 11.713 | 20.580 | 1.00 | 23.57 | C   |
| ATOM | 2330 | SD  | MET | A | 298 | -21.327 | 12.337 | 21.577 | 1.00 | 29.35 | S   |
| ATOM | 2331 | CE  | MET | A | 298 | -20.736 | 14.067 | 22.065 | 1.00 | 21.21 | C   |
| ATOM | 2332 | N   | PRO | A | 299 | -22.855 | 9.926  | 19.902 | 1.00 | 25.70 | N   |
| ATOM | 2333 | CA  | PRO | A | 299 | -22.933 | 9.341  | 21.242 | 1.00 | 23.52 | C   |
| ATOM | 2334 | C   | PRO | A | 299 | -23.444 | 7.894  | 21.195 | 1.00 | 22.57 | C   |
| ATOM | 2335 | O   | PRO | A | 299 | -22.991 | 7.044  | 21.985 | 1.00 | 18.81 | O   |
| ATOM | 2336 | CB  | PRO | A | 299 | -23.889 | 10.297 | 21.982 | 1.00 | 24.67 | C   |
| ATOM | 2337 | CG  | PRO | A | 299 | -24.523 | 11.190 | 20.892 | 1.00 | 23.48 | C   |
| ATOM | 2338 | CD  | PRO | A | 299 | -24.126 | 10.590 | 19.566 | 1.00 | 26.37 | C   |
| ATOM | 2339 | N   | ALA | A | 300 | -24.449 | 7.663  | 20.336 | 1.00 | 23.45 | N   |
| ATOM | 2340 | CA  | ALA | A | 300 | -24.730 | 6.330  | 19.769 | 1.00 | 24.55 | C   |
| ATOM | 2341 | C   | ALA | A | 300 | -26.034 | 6.174  | 18.960 | 1.00 | 23.16 | C   |
| ATOM | 2342 | O   | ALA | A | 300 | -26.739 | 7.152  | 18.691 | 1.00 | 21.49 | O   |
| ATOM | 2343 | CB  | ALA | A | 300 | -24.655 | 5.248  | 20.867 | 1.00 | 26.49 | C   |
| ATOM | 2344 | N   | ASP | A | 301 | -26.398 | 4.908  | 18.733 | 1.00 | 24.12 | N   |
| ATOM | 2345 | CA  | ASP | A | 301 | -27.360 | 4.437  | 17.718 | 1.00 | 25.32 | C   |
| ATOM | 2346 | C   | ASP | A | 301 | -28.711 | 5.075  | 17.818 | 1.00 | 26.66 | C   |
| ATOM | 2347 | O   | ASP | A | 301 | -29.504 | 4.991  | 16.890 | 1.00 | 27.53 | O   |
| ATOM | 2348 | CB  | ASP | A | 301 | -27.548 | 2.919  | 17.890 | 1.00 | 26.16 | C   |
| ATOM | 2349 | CG  | ASP | A | 301 | -28.362 | 2.254  | 16.767 | 1.00 | 27.64 | C   |
| ATOM | 2350 | OD1 | ASP | A | 301 | -28.582 | 2.850  | 15.681 | 1.00 | 27.63 | O   |
| ATOM | 2351 | OD2 | ASP | A | 301 | -28.674 | 1.051  | 16.947 | 1.00 | 26.67 | O1- |
| ATOM | 2352 | N   | LEU | A | 302 | -28.958 | 5.727  | 18.946 | 1.00 | 30.35 | N   |
| ATOM | 2353 | CA  | LEU | A | 302 | -30.086 | 5.351  | 19.792 | 1.00 | 31.56 | C   |
| ATOM | 2354 | C   | LEU | A | 302 | -30.537 | 6.488  | 20.686 | 1.00 | 33.72 | C   |
| ATOM | 2355 | O   | LEU | A | 302 | -29.798 | 7.474  | 20.867 | 1.00 | 34.95 | O   |
| ATOM | 2356 | CB  | LEU | A | 302 | -29.647 | 4.182  | 20.653 | 1.00 | 28.92 | C   |
| ATOM | 2357 | CG  | LEU | A | 302 | -28.155 | 4.371  | 20.967 | 1.00 | 31.25 | C   |
| ATOM | 2358 | CD1 | LEU | A | 302 | -27.961 | 5.472  | 22.020 | 1.00 | 31.44 | C   |
| ATOM | 2359 | CD2 | LEU | A | 302 | -27.489 | 3.041  | 21.378 | 1.00 | 32.08 | C   |
| ATOM | 2360 | N   | PRO | A | 303 | -31.584 | 6.224  | 21.488 | 1.00 | 35.90 | N   |
| ATOM | 2361 | CA  | PRO | A | 303 | -31.430 | 6.284  | 22.954 | 1.00 | 38.93 | C   |
| ATOM | 2362 | C   | PRO | A | 303 | -30.874 | 4.971  | 23.513 | 1.00 | 38.86 | C   |
| ATOM | 2363 | O   | PRO | A | 303 | -29.892 | 4.975  | 24.269 | 1.00 | 38.96 | O   |
| ATOM | 2364 | CB  | PRO | A | 303 | -32.853 | 6.564  | 23.459 | 1.00 | 38.70 | C   |
| ATOM | 2365 | CG  | PRO | A | 303 | -33.766 | 6.592  | 22.142 | 1.00 | 38.82 | C   |
| ATOM | 2366 | CD  | PRO | A | 303 | -32.961 | 5.875  | 21.101 | 1.00 | 36.51 | C   |

|      |      |     |     |   |     |         |         |        |      |       |     |
|------|------|-----|-----|---|-----|---------|---------|--------|------|-------|-----|
| ATOM | 2367 | N   | SER | A | 304 | -31.360 | 3.855   | 22.964 | 1.00 | 37.24 | N   |
| ATOM | 2368 | CA  | SER | A | 304 | -31.097 | 2.522   | 23.528 | 1.00 | 35.92 | C   |
| ATOM | 2369 | C   | SER | A | 304 | -31.120 | 2.445   | 25.034 | 1.00 | 32.14 | C   |
| ATOM | 2370 | O   | SER | A | 304 | -30.681 | 1.441   | 25.597 | 1.00 | 30.33 | O   |
| ATOM | 2371 | CB  | SER | A | 304 | -29.774 | 1.948   | 23.042 | 1.00 | 36.77 | C   |
| ATOM | 2372 | OG  | SER | A | 304 | -30.029 | 0.971   | 22.042 | 1.00 | 42.09 | O   |
| ATOM | 2373 | N   | LEU | A | 305 | -31.942 | 3.312   | 25.607 | 1.00 | 30.13 | N   |
| ATOM | 2374 | CA  | LEU | A | 305 | -32.018 | 3.481   | 27.031 | 1.00 | 30.37 | C   |
| ATOM | 2375 | C   | LEU | A | 305 | -30.913 | 2.663   | 27.730 | 1.00 | 31.82 | C   |
| ATOM | 2376 | O   | LEU | A | 305 | -29.749 | 3.000   | 27.555 | 1.00 | 35.56 | O   |
| ATOM | 2377 | CB  | LEU | A | 305 | -33.405 | 3.084   | 27.532 | 1.00 | 29.63 | C   |
| ATOM | 2378 | CG  | LEU | A | 305 | -34.657 | 3.305   | 26.681 | 1.00 | 28.08 | C   |
| ATOM | 2379 | CD1 | LEU | A | 305 | -35.835 | 3.366   | 27.647 | 1.00 | 28.23 | C   |
| ATOM | 2380 | CD2 | LEU | A | 305 | -34.583 | 4.576   | 25.848 | 1.00 | 26.17 | C   |
| ATOM | 2381 | N   | ALA | A | 306 | -31.218 | 1.418   | 28.097 | 1.00 | 28.81 | N   |
| ATOM | 2382 | CA  | ALA | A | 306 | -30.480 | 0.759   | 29.160 | 1.00 | 25.85 | C   |
| ATOM | 2383 | C   | ALA | A | 306 | -30.048 | -0.635  | 28.744 | 1.00 | 24.00 | C   |
| ATOM | 2384 | O   | ALA | A | 306 | -30.699 | -1.241  | 27.912 | 1.00 | 23.85 | O   |
| ATOM | 2385 | CB  | ALA | A | 306 | -31.353 | 0.688   | 30.406 | 1.00 | 28.20 | C   |
| ATOM | 2386 | N   | ALA | A | 307 | -29.050 | -1.198  | 29.422 | 1.00 | 22.64 | N   |
| ATOM | 2387 | CA  | ALA | A | 307 | -28.519 | -2.505  | 29.043 | 1.00 | 24.62 | C   |
| ATOM | 2388 | C   | ALA | A | 307 | -28.896 | -3.578  | 30.063 | 1.00 | 25.94 | C   |
| ATOM | 2389 | O   | ALA | A | 307 | -28.053 | -4.112  | 30.807 | 1.00 | 22.41 | O   |
| ATOM | 2390 | CB  | ALA | A | 307 | -26.990 | -2.432  | 28.860 | 1.00 | 26.11 | C   |
| ATOM | 2391 | N   | ASP | A | 308 | -30.187 | -3.895  | 30.092 | 1.00 | 28.91 | N   |
| ATOM | 2392 | CA  | ASP | A | 308 | -30.732 | -4.831  | 31.078 | 1.00 | 27.05 | C   |
| ATOM | 2393 | C   | ASP | A | 308 | -31.350 | -6.031  | 30.350 | 1.00 | 26.11 | C   |
| ATOM | 2394 | O   | ASP | A | 308 | -32.535 | -6.372  | 30.516 | 1.00 | 24.92 | O   |
| ATOM | 2395 | CB  | ASP | A | 308 | -31.721 | -4.099  | 32.001 | 1.00 | 25.32 | C   |
| ATOM | 2396 | CG  | ASP | A | 308 | -31.006 | -3.359  | 33.154 | 1.00 | 25.24 | C   |
| ATOM | 2397 | OD1 | ASP | A | 308 | -29.958 | -3.840  | 33.629 | 1.00 | 19.08 | O   |
| ATOM | 2398 | OD2 | ASP | A | 308 | -31.452 | -2.267  | 33.552 | 1.00 | 27.30 | O1- |
| ATOM | 2399 | N   | PHE | A | 309 | -30.575 | -6.493  | 29.370 | 1.00 | 21.83 | N   |
| ATOM | 2400 | CA  | PHE | A | 309 | -30.779 | -7.762  | 28.711 | 1.00 | 18.30 | C   |
| ATOM | 2401 | C   | PHE | A | 309 | -29.716 | -8.657  | 29.238 | 1.00 | 15.33 | C   |
| ATOM | 2402 | O   | PHE | A | 309 | -29.757 | -9.841  | 29.018 | 1.00 | 18.02 | O   |
| ATOM | 2403 | CB  | PHE | A | 309 | -30.554 | -7.614  | 27.217 | 1.00 | 21.96 | C   |
| ATOM | 2404 | CG  | PHE | A | 309 | -31.727 | -8.017  | 26.378 | 1.00 | 22.43 | C   |
| ATOM | 2405 | CD1 | PHE | A | 309 | -33.007 | -8.013  | 26.902 | 1.00 | 21.17 | C   |
| ATOM | 2406 | CD2 | PHE | A | 309 | -31.532 | -8.450  | 25.084 | 1.00 | 21.60 | C   |
| ATOM | 2407 | CE1 | PHE | A | 309 | -34.060 | -8.440  | 26.163 | 1.00 | 22.58 | C   |
| ATOM | 2408 | CE2 | PHE | A | 309 | -32.577 | -8.876  | 24.337 | 1.00 | 24.09 | C   |
| ATOM | 2409 | CZ  | PHE | A | 309 | -33.851 | -8.876  | 24.874 | 1.00 | 26.92 | C   |
| ATOM | 2410 | N   | VAL | A | 310 | -28.619 | -8.040  | 29.631 | 1.00 | 17.52 | N   |
| ATOM | 2411 | CA  | VAL | A | 310 | -27.491 | -8.754  | 30.234 | 1.00 | 21.16 | C   |
| ATOM | 2412 | C   | VAL | A | 310 | -27.676 | -8.866  | 31.760 | 1.00 | 22.19 | C   |
| ATOM | 2413 | O   | VAL | A | 310 | -26.735 | -9.228  | 32.476 | 1.00 | 19.99 | O   |
| ATOM | 2414 | CB  | VAL | A | 310 | -26.093 | -8.031  | 29.910 | 1.00 | 22.76 | C   |
| ATOM | 2415 | CG1 | VAL | A | 310 | -26.078 | -7.481  | 28.455 | 1.00 | 16.58 | C   |
| ATOM | 2416 | CG2 | VAL | A | 310 | -25.796 | -6.903  | 30.929 | 1.00 | 19.12 | C   |
| ATOM | 2417 | N   | GLU | A | 311 | -28.904 | -8.615  | 32.231 | 1.00 | 24.86 | N   |
| ATOM | 2418 | CA  | GLU | A | 311 | -29.132 | -8.190  | 33.620 | 1.00 | 25.85 | C   |
| ATOM | 2419 | C   | GLU | A | 311 | -30.462 | -8.620  | 34.250 | 1.00 | 26.80 | C   |
| ATOM | 2420 | O   | GLU | A | 311 | -30.617 | -9.786  | 34.614 | 1.00 | 26.88 | O   |
| ATOM | 2421 | CB  | GLU | A | 311 | -28.997 | -6.672  | 33.724 | 1.00 | 24.55 | C   |
| ATOM | 2422 | CG  | GLU | A | 311 | -28.150 | -6.231  | 34.893 | 1.00 | 24.81 | C   |
| ATOM | 2423 | CD  | GLU | A | 311 | -28.390 | -7.071  | 36.097 | 1.00 | 22.49 | C   |
| ATOM | 2424 | OE1 | GLU | A | 311 | -29.486 | -6.952  | 36.659 | 1.00 | 27.72 | O   |
| ATOM | 2425 | OE2 | GLU | A | 311 | -27.551 | -7.932  | 36.415 | 1.00 | 21.47 | O1- |
| ATOM | 2426 | N   | SER | A | 312 | -31.340 | -7.646  | 34.518 | 1.00 | 27.11 | N   |
| ATOM | 2427 | CA  | SER | A | 312 | -32.668 | -7.899  | 35.086 | 1.00 | 28.09 | C   |
| ATOM | 2428 | C   | SER | A | 312 | -33.508 | -8.811  | 34.212 | 1.00 | 29.00 | C   |
| ATOM | 2429 | O   | SER | A | 312 | -34.603 | -8.413  | 33.813 | 1.00 | 32.24 | O   |
| ATOM | 2430 | CB  | SER | A | 312 | -33.463 | -6.594  | 35.244 | 1.00 | 25.60 | C   |
| ATOM | 2431 | OG  | SER | A | 312 | -32.912 | -5.751  | 36.227 | 1.00 | 29.41 | O   |
| ATOM | 2432 | N   | LYS | A | 313 | -33.071 | -10.047 | 34.005 | 1.00 | 27.40 | N   |
| ATOM | 2433 | CA  | LYS | A | 313 | -33.782 | -10.965 | 33.129 | 1.00 | 27.14 | C   |
| ATOM | 2434 | C   | LYS | A | 313 | -33.672 | -12.368 | 33.711 | 1.00 | 30.75 | C   |
| ATOM | 2435 | O   | LYS | A | 313 | -33.007 | -12.566 | 34.740 | 1.00 | 31.32 | O   |
| ATOM | 2436 | CB  | LYS | A | 313 | -33.153 | -10.936 | 31.738 | 1.00 | 21.94 | C   |
| ATOM | 2437 | CG  | LYS | A | 313 | -33.859 | -11.786 | 30.716 | 1.00 | 17.30 | C   |

|      |      |     |     |   |     |         |         |        |      |       |     |
|------|------|-----|-----|---|-----|---------|---------|--------|------|-------|-----|
| ATOM | 2438 | CD  | LYS | A | 313 | -34.578 | -10.916 | 29.723 | 1.00 | 15.90 | C   |
| ATOM | 2439 | CE  | LYS | A | 313 | -34.503 | -11.512 | 28.346 | 1.00 | 12.19 | C   |
| ATOM | 2440 | NZ  | LYS | A | 313 | -33.124 | -11.478 | 27.875 | 1.00 | 14.13 | N1+ |
| ATOM | 2441 | N   | ASP | A | 314 | -34.367 | -13.332 | 33.102 | 1.00 | 33.04 | N   |
| ATOM | 2442 | CA  | ASP | A | 314 | -33.947 | -14.726 | 33.210 | 1.00 | 34.53 | C   |
| ATOM | 2443 | C   | ASP | A | 314 | -33.696 | -15.303 | 31.820 | 1.00 | 34.78 | C   |
| ATOM | 2444 | O   | ASP | A | 314 | -34.638 | -15.649 | 31.091 | 1.00 | 34.31 | O   |
| ATOM | 2445 | CB  | ASP | A | 314 | -34.962 | -15.587 | 33.974 | 1.00 | 34.53 | C   |
| ATOM | 2446 | CG  | ASP | A | 314 | -34.538 | -17.065 | 34.066 | 1.00 | 36.92 | C   |
| ATOM | 2447 | OD1 | ASP | A | 314 | -33.379 | -17.438 | 33.692 | 1.00 | 33.31 | O   |
| ATOM | 2448 | OD2 | ASP | A | 314 | -35.415 | -17.878 | 34.458 | 1.00 | 41.34 | O1- |
| ATOM | 2449 | N   | VAL | A | 315 | -32.463 | -15.055 | 31.384 | 1.00 | 33.55 | N   |
| ATOM | 2450 | CA  | VAL | A | 315 | -31.752 | -15.855 | 30.402 | 1.00 | 30.37 | C   |
| ATOM | 2451 | C   | VAL | A | 315 | -30.272 | -15.815 | 30.829 | 1.00 | 28.87 | C   |
| ATOM | 2452 | O   | VAL | A | 315 | -29.493 | -14.952 | 30.414 | 1.00 | 25.57 | O   |
| ATOM | 2453 | CB  | VAL | A | 315 | -31.929 | -15.287 | 28.979 | 1.00 | 32.83 | C   |
| ATOM | 2454 | CG1 | VAL | A | 315 | -33.417 | -15.436 | 28.512 | 1.00 | 29.71 | C   |
| ATOM | 2455 | CG2 | VAL | A | 315 | -31.453 | -13.820 | 28.934 | 1.00 | 33.25 | C   |
| ATOM | 2456 | N   | CYS | A | 316 | -30.032 | -16.517 | 31.931 | 1.00 | 29.88 | N   |
| ATOM | 2457 | CA  | CYS | A | 316 | -28.683 | -16.794 | 32.423 | 1.00 | 27.73 | C   |
| ATOM | 2458 | C   | CYS | A | 316 | -27.953 | -17.584 | 31.361 | 1.00 | 26.33 | C   |
| ATOM | 2459 | O   | CYS | A | 316 | -27.153 | -17.013 | 30.620 | 1.00 | 26.76 | O   |
| ATOM | 2460 | CB  | CYS | A | 316 | -28.734 | -17.628 | 33.688 | 1.00 | 27.85 | C   |
| ATOM | 2461 | SG  | CYS | A | 316 | -27.077 | -18.069 | 34.276 | 1.00 | 31.37 | S   |
| ATOM | 2462 | N   | LYS | A | 317 | -28.313 | -18.863 | 31.217 | 1.00 | 22.54 | N   |
| ATOM | 2463 | CA  | LYS | A | 317 | -27.900 | -19.631 | 30.046 | 1.00 | 21.29 | C   |
| ATOM | 2464 | C   | LYS | A | 317 | -28.905 | -19.504 | 28.912 | 1.00 | 22.46 | C   |
| ATOM | 2465 | O   | LYS | A | 317 | -28.510 | -19.220 | 27.790 | 1.00 | 22.63 | O   |
| ATOM | 2466 | CB  | LYS | A | 317 | -27.693 | -21.120 | 30.369 | 1.00 | 18.85 | C   |
| ATOM | 2467 | CG  | LYS | A | 317 | -26.247 | -21.541 | 30.640 | 1.00 | 18.02 | C   |
| ATOM | 2468 | CD  | LYS | A | 317 | -26.179 | -22.731 | 31.604 | 1.00 | 20.06 | C   |
| ATOM | 2469 | CE  | LYS | A | 317 | -24.770 | -22.943 | 32.219 | 1.00 | 22.33 | C   |
| ATOM | 2470 | NZ  | LYS | A | 317 | -24.375 | -24.401 | 32.437 | 1.00 | 22.00 | N1+ |
| ATOM | 2471 | N   | ASN | A | 318 | -30.201 | -19.646 | 29.199 | 1.00 | 22.97 | N   |
| ATOM | 2472 | CA  | ASN | A | 318 | -31.215 | -19.864 | 28.143 | 1.00 | 22.32 | C   |
| ATOM | 2473 | C   | ASN | A | 318 | -30.963 | -19.181 | 26.798 | 1.00 | 24.26 | C   |
| ATOM | 2474 | O   | ASN | A | 318 | -31.447 | -19.657 | 25.759 | 1.00 | 26.24 | O   |
| ATOM | 2475 | CB  | ASN | A | 318 | -32.607 | -19.439 | 28.601 | 1.00 | 19.64 | C   |
| ATOM | 2476 | CG  | ASN | A | 318 | -33.659 | -19.693 | 27.542 | 1.00 | 17.20 | C   |
| ATOM | 2477 | ND2 | ASN | A | 318 | -33.852 | -18.753 | 26.630 | 1.00 | 17.37 | N   |
| ATOM | 2478 | OD1 | ASN | A | 318 | -34.234 | -20.753 | 27.507 | 1.00 | 19.89 | O   |
| ATOM | 2479 | N   | TYR | A | 319 | -30.390 | -17.978 | 26.856 | 1.00 | 23.97 | N   |
| ATOM | 2480 | CA  | TYR | A | 319 | -30.222 | -17.095 | 25.694 | 1.00 | 24.24 | C   |
| ATOM | 2481 | C   | TYR | A | 319 | -28.722 | -16.854 | 25.621 | 1.00 | 23.49 | C   |
| ATOM | 2482 | O   | TYR | A | 319 | -28.250 | -15.857 | 25.088 | 1.00 | 22.66 | O   |
| ATOM | 2483 | CB  | TYR | A | 319 | -31.022 | -15.804 | 25.948 | 1.00 | 23.01 | C   |
| ATOM | 2484 | CG  | TYR | A | 319 | -30.749 | -14.587 | 25.094 | 1.00 | 22.30 | C   |
| ATOM | 2485 | CD1 | TYR | A | 319 | -31.440 | -14.393 | 23.908 | 1.00 | 24.18 | C   |
| ATOM | 2486 | CD2 | TYR | A | 319 | -30.040 | -13.502 | 25.616 | 1.00 | 20.42 | C   |
| ATOM | 2487 | CE1 | TYR | A | 319 | -31.453 | -13.148 | 23.278 | 1.00 | 23.68 | C   |
| ATOM | 2488 | CE2 | TYR | A | 319 | -30.044 | -12.265 | 24.993 | 1.00 | 17.71 | C   |
| ATOM | 2489 | CZ  | TYR | A | 319 | -30.751 | -12.097 | 23.826 | 1.00 | 20.42 | C   |
| ATOM | 2490 | OH  | TYR | A | 319 | -30.732 | -10.898 | 23.159 | 1.00 | 22.03 | O   |
| ATOM | 2491 | N   | ALA | A | 320 | -27.993 | -17.889 | 25.995 | 1.00 | 21.15 | N   |
| ATOM | 2492 | CA  | ALA | A | 320 | -26.572 | -17.798 | 26.227 | 1.00 | 23.56 | C   |
| ATOM | 2493 | C   | ALA | A | 320 | -26.032 | -19.198 | 26.089 | 1.00 | 25.78 | C   |
| ATOM | 2494 | O   | ALA | A | 320 | -25.428 | -19.751 | 27.004 | 1.00 | 25.36 | O   |
| ATOM | 2495 | CB  | ALA | A | 320 | -26.290 | -17.267 | 27.618 | 1.00 | 24.04 | C   |
| ATOM | 2496 | N   | GLU | A | 321 | -26.398 | -19.828 | 24.985 | 1.00 | 28.84 | N   |
| ATOM | 2497 | CA  | GLU | A | 321 | -25.690 | -21.008 | 24.536 | 1.00 | 27.99 | C   |
| ATOM | 2498 | C   | GLU | A | 321 | -24.907 | -20.746 | 23.257 | 1.00 | 25.24 | C   |
| ATOM | 2499 | O   | GLU | A | 321 | -24.235 | -21.634 | 22.715 | 1.00 | 27.19 | O   |
| ATOM | 2500 | CB  | GLU | A | 321 | -26.658 | -22.167 | 24.388 | 1.00 | 30.20 | C   |
| ATOM | 2501 | CG  | GLU | A | 321 | -26.266 | -23.326 | 25.298 | 1.00 | 37.63 | C   |
| ATOM | 2502 | CD  | GLU | A | 321 | -25.831 | -22.921 | 26.736 | 1.00 | 38.24 | C   |
| ATOM | 2503 | OE1 | GLU | A | 321 | -24.725 | -22.329 | 26.915 | 1.00 | 36.30 | O   |
| ATOM | 2504 | OE2 | GLU | A | 321 | -26.509 | -23.388 | 27.699 | 1.00 | 40.13 | O1- |
| ATOM | 2505 | N   | ALA | A | 322 | -24.889 | -19.483 | 22.857 | 1.00 | 20.08 | N   |
| ATOM | 2506 | CA  | ALA | A | 322 | -23.864 | -19.005 | 21.965 | 1.00 | 17.91 | C   |
| ATOM | 2507 | C   | ALA | A | 322 | -22.817 | -18.388 | 22.879 | 1.00 | 16.32 | C   |
| ATOM | 2508 | O   | ALA | A | 322 | -23.051 | -17.332 | 23.441 | 1.00 | 17.37 | O   |

|      |      |     |     |   |     |         |         |        |      |       |     |
|------|------|-----|-----|---|-----|---------|---------|--------|------|-------|-----|
| ATOM | 2509 | CB  | ALA | A | 322 | -24.437 | -17.962 | 21.032 | 1.00 | 16.29 | C   |
| ATOM | 2510 | N   | LYS | A | 323 | -21.746 | -19.116 | 23.166 | 1.00 | 13.15 | N   |
| ATOM | 2511 | CA  | LYS | A | 323 | -20.707 | -18.569 | 24.019 | 1.00 | 13.43 | C   |
| ATOM | 2512 | C   | LYS | A | 323 | -20.251 | -17.244 | 23.408 | 1.00 | 15.07 | C   |
| ATOM | 2513 | O   | LYS | A | 323 | -20.751 | -16.180 | 23.773 | 1.00 | 14.91 | O   |
| ATOM | 2514 | CB  | LYS | A | 323 | -19.537 | -19.560 | 24.124 | 1.00 | 14.15 | C   |
| ATOM | 2515 | CG  | LYS | A | 323 | -18.201 | -18.956 | 24.571 | 1.00 | 15.59 | C   |
| ATOM | 2516 | CD  | LYS | A | 323 | -17.235 | -20.027 | 25.079 | 1.00 | 14.64 | C   |
| ATOM | 2517 | CE  | LYS | A | 323 | -15.850 | -19.935 | 24.450 | 1.00 | 14.18 | C   |
| ATOM | 2518 | NZ  | LYS | A | 323 | -15.145 | -18.696 | 24.813 | 1.00 | 15.36 | N1+ |
| ATOM | 2519 | N   | ASP | A | 324 | -19.608 | -17.372 | 22.252 | 1.00 | 17.96 | N   |
| ATOM | 2520 | CA  | ASP | A | 324 | -18.847 | -16.299 | 21.623 | 1.00 | 15.80 | C   |
| ATOM | 2521 | C   | ASP | A | 324 | -19.718 | -15.035 | 21.411 | 1.00 | 17.56 | C   |
| ATOM | 2522 | O   | ASP | A | 324 | -19.304 | -13.924 | 21.781 | 1.00 | 17.35 | O   |
| ATOM | 2523 | CB  | ASP | A | 324 | -18.233 | -16.790 | 20.275 | 1.00 | 15.91 | C   |
| ATOM | 2524 | CG  | ASP | A | 324 | -17.787 | -18.293 | 20.293 | 1.00 | 16.85 | C   |
| ATOM | 2525 | OD1 | ASP | A | 324 | -16.749 | -18.623 | 20.903 | 1.00 | 15.85 | O   |
| ATOM | 2526 | OD2 | ASP | A | 324 | -18.420 | -19.140 | 19.617 | 1.00 | 17.67 | O1- |
| ATOM | 2527 | N   | VAL | A | 325 | -20.930 | -15.180 | 20.870 | 1.00 | 15.39 | N   |
| ATOM | 2528 | CA  | VAL | A | 325 | -21.660 | -13.979 | 20.467 | 1.00 | 18.29 | C   |
| ATOM | 2529 | C   | VAL | A | 325 | -22.388 | -13.305 | 21.613 | 1.00 | 20.30 | C   |
| ATOM | 2530 | O   | VAL | A | 325 | -22.751 | -12.137 | 21.509 | 1.00 | 20.95 | O   |
| ATOM | 2531 | CB  | VAL | A | 325 | -22.693 | -14.215 | 19.333 | 1.00 | 18.19 | C   |
| ATOM | 2532 | CG1 | VAL | A | 325 | -22.039 | -14.874 | 18.125 | 1.00 | 17.25 | C   |
| ATOM | 2533 | CG2 | VAL | A | 325 | -23.875 | -15.003 | 19.849 | 1.00 | 19.92 | C   |
| ATOM | 2534 | N   | PHE | A | 326 | -22.608 | -14.039 | 22.701 | 1.00 | 23.24 | N   |
| ATOM | 2535 | CA  | PHE | A | 326 | -23.259 | -13.497 | 23.893 | 1.00 | 22.88 | C   |
| ATOM | 2536 | C   | PHE | A | 326 | -22.336 | -12.431 | 24.476 | 1.00 | 23.49 | C   |
| ATOM | 2537 | O   | PHE | A | 326 | -22.675 | -11.242 | 24.548 | 1.00 | 20.07 | O   |
| ATOM | 2538 | CB  | PHE | A | 326 | -23.474 | -14.624 | 24.911 | 1.00 | 23.89 | C   |
| ATOM | 2539 | CG  | PHE | A | 326 | -24.307 | -14.229 | 26.092 | 1.00 | 25.04 | C   |
| ATOM | 2540 | CD1 | PHE | A | 326 | -25.603 | -13.781 | 25.923 | 1.00 | 25.47 | C   |
| ATOM | 2541 | CD2 | PHE | A | 326 | -23.776 | -14.256 | 27.367 | 1.00 | 24.57 | C   |
| ATOM | 2542 | CE1 | PHE | A | 326 | -26.356 | -13.354 | 27.016 | 1.00 | 26.31 | C   |
| ATOM | 2543 | CE2 | PHE | A | 326 | -24.522 | -13.830 | 28.453 | 1.00 | 25.69 | C   |
| ATOM | 2544 | CZ  | PHE | A | 326 | -25.814 | -13.375 | 28.277 | 1.00 | 24.50 | C   |
| ATOM | 2545 | N   | LEU | A | 327 | -21.109 | -12.854 | 24.753 | 1.00 | 24.46 | N   |
| ATOM | 2546 | CA  | LEU | A | 327 | -20.056 | -11.948 | 25.200 | 1.00 | 25.44 | C   |
| ATOM | 2547 | C   | LEU | A | 327 | -19.866 | -10.805 | 24.193 | 1.00 | 23.62 | C   |
| ATOM | 2548 | O   | LEU | A | 327 | -19.782 | -9.623  | 24.568 | 1.00 | 18.87 | O   |
| ATOM | 2549 | CB  | LEU | A | 327 | -18.744 | -12.727 | 25.357 | 1.00 | 25.68 | C   |
| ATOM | 2550 | CG  | LEU | A | 327 | -18.569 | -13.566 | 26.624 | 1.00 | 22.99 | C   |
| ATOM | 2551 | CD1 | LEU | A | 327 | -18.534 | -12.630 | 27.851 | 1.00 | 21.08 | C   |
| ATOM | 2552 | CD2 | LEU | A | 327 | -19.688 | -14.578 | 26.719 | 1.00 | 21.68 | C   |
| ATOM | 2553 | N   | GLY | A | 328 | -19.861 | -11.175 | 22.911 | 1.00 | 22.86 | N   |
| ATOM | 2554 | CA  | GLY | A | 328 | -19.715 | -10.197 | 21.850 | 1.00 | 19.96 | C   |
| ATOM | 2555 | C   | GLY | A | 328 | -20.775 | -9.121  | 21.937 | 1.00 | 18.31 | C   |
| ATOM | 2556 | O   | GLY | A | 328 | -20.496 | -7.961  | 21.651 | 1.00 | 14.99 | O   |
| ATOM | 2557 | N   | MET | A | 329 | -21.988 | -9.503  | 22.332 | 1.00 | 18.03 | N   |
| ATOM | 2558 | CA  | MET | A | 329 | -23.095 | -8.563  | 22.406 | 1.00 | 16.11 | C   |
| ATOM | 2559 | C   | MET | A | 329 | -23.171 | -7.903  | 23.772 | 1.00 | 16.92 | C   |
| ATOM | 2560 | O   | MET | A | 329 | -23.768 | -6.838  | 23.930 | 1.00 | 12.56 | O   |
| ATOM | 2561 | CB  | MET | A | 329 | -24.412 | -9.253  | 22.090 | 1.00 | 15.19 | C   |
| ATOM | 2562 | CG  | MET | A | 329 | -25.567 | -8.288  | 22.048 | 1.00 | 16.53 | C   |
| ATOM | 2563 | SD  | MET | A | 329 | -26.910 | -8.847  | 21.026 | 1.00 | 19.89 | S   |
| ATOM | 2564 | CE  | MET | A | 329 | -27.585 | -7.279  | 20.531 | 1.00 | 17.00 | C   |
| ATOM | 2565 | N   | PHE | A | 330 | -22.516 | -8.495  | 24.761 | 1.00 | 18.68 | N   |
| ATOM | 2566 | CA  | PHE | A | 330 | -22.249 | -7.713  | 25.953 | 1.00 | 20.67 | C   |
| ATOM | 2567 | C   | PHE | A | 330 | -21.302 | -6.630  | 25.467 | 1.00 | 20.74 | C   |
| ATOM | 2568 | O   | PHE | A | 330 | -21.793 | -5.643  | 24.911 | 1.00 | 18.89 | O   |
| ATOM | 2569 | CB  | PHE | A | 330 | -21.628 | -8.544  | 27.091 | 1.00 | 19.97 | C   |
| ATOM | 2570 | CG  | PHE | A | 330 | -21.607 | -7.824  | 28.417 | 1.00 | 17.23 | C   |
| ATOM | 2571 | CD1 | PHE | A | 330 | -22.552 | -6.854  | 28.710 | 1.00 | 16.05 | C   |
| ATOM | 2572 | CD2 | PHE | A | 330 | -20.594 | -8.041  | 29.323 | 1.00 | 16.93 | C   |
| ATOM | 2573 | CE1 | PHE | A | 330 | -22.478 | -6.118  | 29.854 | 1.00 | 13.30 | C   |
| ATOM | 2574 | CE2 | PHE | A | 330 | -20.523 | -7.294  | 30.483 | 1.00 | 15.90 | C   |
| ATOM | 2575 | CZ  | PHE | A | 330 | -21.464 | -6.336  | 30.738 | 1.00 | 14.36 | C   |
| ATOM | 2576 | N   | LEU | A | 331 | -20.019 | -7.003  | 25.336 | 1.00 | 21.76 | N   |
| ATOM | 2577 | CA  | LEU | A | 331 | -18.930 | -6.124  | 24.885 | 1.00 | 22.65 | C   |
| ATOM | 2578 | C   | LEU | A | 331 | -19.431 | -4.988  | 24.012 | 1.00 | 26.84 | C   |
| ATOM | 2579 | O   | LEU | A | 331 | -19.549 | -3.859  | 24.503 | 1.00 | 30.55 | O   |

|      |      |     |     |   |     |         |        |        |      |       |     |
|------|------|-----|-----|---|-----|---------|--------|--------|------|-------|-----|
| ATOM | 2580 | CB  | LEU | A | 331 | -17.900 | -6.919 | 24.093 | 1.00 | 21.01 | C   |
| ATOM | 2581 | CG  | LEU | A | 331 | -16.415 | -6.566 | 24.178 | 1.00 | 21.98 | C   |
| ATOM | 2582 | CD1 | LEU | A | 331 | -16.125 | -5.467 | 25.205 | 1.00 | 18.67 | C   |
| ATOM | 2583 | CD2 | LEU | A | 331 | -15.674 | -7.848 | 24.537 | 1.00 | 19.61 | C   |
| ATOM | 2584 | N   | TYR | A | 332 | -19.930 | -5.338 | 22.816 | 1.00 | 27.17 | N   |
| ATOM | 2585 | CA  | TYR | A | 332 | -20.406 | -4.377 | 21.794 | 1.00 | 24.12 | C   |
| ATOM | 2586 | C   | TYR | A | 332 | -21.396 | -3.374 | 22.322 | 1.00 | 22.23 | C   |
| ATOM | 2587 | O   | TYR | A | 332 | -21.229 | -2.187 | 22.105 | 1.00 | 22.76 | O   |
| ATOM | 2588 | CB  | TYR | A | 332 | -21.021 | -5.134 | 20.599 | 1.00 | 22.53 | C   |
| ATOM | 2589 | CG  | TYR | A | 332 | -22.199 | -4.494 | 19.884 | 1.00 | 16.65 | C   |
| ATOM | 2590 | CD1 | TYR | A | 332 | -22.123 | -3.225 | 19.365 | 1.00 | 17.03 | C   |
| ATOM | 2591 | CD2 | TYR | A | 332 | -23.319 | -5.242 | 19.579 | 1.00 | 15.91 | C   |
| ATOM | 2592 | CE1 | TYR | A | 332 | -23.132 | -2.727 | 18.564 | 1.00 | 15.87 | C   |
| ATOM | 2593 | CE2 | TYR | A | 332 | -24.309 | -4.760 | 18.779 | 1.00 | 12.78 | C   |
| ATOM | 2594 | CZ  | TYR | A | 332 | -24.219 | -3.503 | 18.270 | 1.00 | 12.74 | C   |
| ATOM | 2595 | OH  | TYR | A | 332 | -25.211 | -3.032 | 17.443 | 1.00 | 11.75 | O   |
| ATOM | 2596 | N   | GLU | A | 333 | -22.462 | -3.858 | 22.947 | 1.00 | 21.11 | N   |
| ATOM | 2597 | CA  | GLU | A | 333 | -23.480 | -2.982 | 23.516 | 1.00 | 19.69 | C   |
| ATOM | 2598 | C   | GLU | A | 333 | -22.973 | -2.225 | 24.753 | 1.00 | 19.94 | C   |
| ATOM | 2599 | O   | GLU | A | 333 | -23.239 | -1.039 | 24.920 | 1.00 | 21.44 | O   |
| ATOM | 2600 | CB  | GLU | A | 333 | -24.722 | -3.791 | 23.854 | 1.00 | 17.19 | C   |
| ATOM | 2601 | CG  | GLU | A | 333 | -25.676 | -3.903 | 22.700 | 1.00 | 13.27 | C   |
| ATOM | 2602 | CD  | GLU | A | 333 | -26.462 | -2.640 | 22.499 | 1.00 | 16.80 | C   |
| ATOM | 2603 | OE1 | GLU | A | 333 | -26.673 | -1.903 | 23.474 | 1.00 | 17.89 | O   |
| ATOM | 2604 | OE2 | GLU | A | 333 | -26.870 | -2.358 | 21.358 | 1.00 | 21.21 | O1- |
| ATOM | 2605 | N   | TYR | A | 334 | -22.108 | -2.846 | 25.535 | 1.00 | 17.50 | N   |
| ATOM | 2606 | CA  | TYR | A | 334 | -21.473 | -2.102 | 26.591 | 1.00 | 16.87 | C   |
| ATOM | 2607 | C   | TYR | A | 334 | -20.552 | -1.074 | 25.929 | 1.00 | 17.20 | C   |
| ATOM | 2608 | O   | TYR | A | 334 | -20.643 | 0.126  | 26.220 | 1.00 | 15.06 | O   |
| ATOM | 2609 | CB  | TYR | A | 334 | -20.694 | -3.049 | 27.511 | 1.00 | 19.62 | C   |
| ATOM | 2610 | CG  | TYR | A | 334 | -20.693 | -2.600 | 28.969 | 1.00 | 21.56 | C   |
| ATOM | 2611 | CD1 | TYR | A | 334 | -20.828 | -1.258 | 29.304 | 1.00 | 23.27 | C   |
| ATOM | 2612 | CD2 | TYR | A | 334 | -20.546 | -3.503 | 29.994 | 1.00 | 19.88 | C   |
| ATOM | 2613 | CE1 | TYR | A | 334 | -20.808 | -0.840 | 30.609 | 1.00 | 21.45 | C   |
| ATOM | 2614 | CE2 | TYR | A | 334 | -20.523 | -3.084 | 31.297 | 1.00 | 21.56 | C   |
| ATOM | 2615 | CZ  | TYR | A | 334 | -20.643 | -1.750 | 31.594 | 1.00 | 21.82 | C   |
| ATOM | 2616 | OH  | TYR | A | 334 | -20.475 | -1.288 | 32.873 | 1.00 | 24.16 | O   |
| ATOM | 2617 | N   | ALA | A | 335 | -19.934 | -1.510 | 24.833 | 1.00 | 16.03 | N   |
| ATOM | 2618 | CA  | ALA | A | 335 | -18.944 | -0.733 | 24.108 | 1.00 | 15.10 | C   |
| ATOM | 2619 | C   | ALA | A | 335 | -19.581 | 0.539  | 23.577 | 1.00 | 16.13 | C   |
| ATOM | 2620 | O   | ALA | A | 335 | -19.116 | 1.638  | 23.861 | 1.00 | 17.41 | O   |
| ATOM | 2621 | CB  | ALA | A | 335 | -18.392 | -1.555 | 22.966 | 1.00 | 13.10 | C   |
| ATOM | 2622 | N   | ARG | A | 336 | -20.753 | 0.374  | 22.974 | 1.00 | 16.93 | N   |
| ATOM | 2623 | CA  | ARG | A | 336 | -21.547 | 1.458  | 22.418 | 1.00 | 16.89 | C   |
| ATOM | 2624 | C   | ARG | A | 336 | -21.658 | 2.712  | 23.290 | 1.00 | 18.08 | C   |
| ATOM | 2625 | O   | ARG | A | 336 | -21.482 | 3.820  | 22.803 | 1.00 | 16.00 | O   |
| ATOM | 2626 | CB  | ARG | A | 336 | -22.946 | 0.940  | 22.127 | 1.00 | 17.05 | C   |
| ATOM | 2627 | CG  | ARG | A | 336 | -23.108 | 0.324  | 20.776 | 1.00 | 16.01 | C   |
| ATOM | 2628 | CD  | ARG | A | 336 | -24.129 | 1.117  | 19.996 | 1.00 | 18.77 | C   |
| ATOM | 2629 | NE  | ARG | A | 336 | -25.334 | 0.350  | 19.735 | 1.00 | 23.35 | N   |
| ATOM | 2630 | CZ  | ARG | A | 336 | -25.554 | -0.337 | 18.613 | 1.00 | 26.57 | C   |
| ATOM | 2631 | NH1 | ARG | A | 336 | -24.595 | -0.458 | 17.700 | 1.00 | 24.51 | N1+ |
| ATOM | 2632 | NH2 | ARG | A | 336 | -26.743 | -0.891 | 18.390 | 1.00 | 27.93 | N   |
| ATOM | 2633 | N   | ARG | A | 337 | -22.052 | 2.543  | 24.548 | 1.00 | 21.47 | N   |
| ATOM | 2634 | CA  | ARG | A | 337 | -22.449 | 3.689  | 25.383 | 1.00 | 24.30 | C   |
| ATOM | 2635 | C   | ARG | A | 337 | -21.309 | 4.239  | 26.248 | 1.00 | 23.58 | C   |
| ATOM | 2636 | O   | ARG | A | 337 | -21.539 | 4.923  | 27.280 | 1.00 | 21.32 | O   |
| ATOM | 2637 | CB  | ARG | A | 337 | -23.657 | 3.342  | 26.285 | 1.00 | 27.68 | C   |
| ATOM | 2638 | CG  | ARG | A | 337 | -24.089 | 1.856  | 26.376 | 1.00 | 29.06 | C   |
| ATOM | 2639 | CD  | ARG | A | 337 | -25.460 | 1.731  | 27.076 | 1.00 | 29.77 | C   |
| ATOM | 2640 | NE  | ARG | A | 337 | -26.418 | 0.886  | 26.353 | 1.00 | 28.59 | N   |
| ATOM | 2641 | CZ  | ARG | A | 337 | -26.845 | 1.102  | 25.108 | 1.00 | 28.23 | C   |
| ATOM | 2642 | NH1 | ARG | A | 337 | -26.324 | 2.083  | 24.382 | 1.00 | 27.06 | N1+ |
| ATOM | 2643 | NH2 | ARG | A | 337 | -27.795 | 0.324  | 24.582 | 1.00 | 24.49 | N   |
| ATOM | 2644 | N   | HIS | A | 338 | -20.082 | 3.889  | 25.864 | 1.00 | 21.05 | N   |
| ATOM | 2645 | CA  | HIS | A | 338 | -18.922 | 4.164  | 26.703 | 1.00 | 18.37 | C   |
| ATOM | 2646 | C   | HIS | A | 338 | -17.702 | 4.574  | 25.901 | 1.00 | 13.99 | C   |
| ATOM | 2647 | O   | HIS | A | 338 | -16.611 | 4.073  | 26.118 | 1.00 | 11.40 | O   |
| ATOM | 2648 | CB  | HIS | A | 338 | -18.610 | 2.954  | 27.576 | 1.00 | 19.06 | C   |
| ATOM | 2649 | CG  | HIS | A | 338 | -19.551 | 2.791  | 28.728 | 1.00 | 21.75 | C   |
| ATOM | 2650 | CD2 | HIS | A | 338 | -19.937 | 1.685  | 29.406 | 1.00 | 21.31 | C   |

|      |      |     |     |   |     |         |        |        |      |       |     |
|------|------|-----|-----|---|-----|---------|--------|--------|------|-------|-----|
| ATOM | 2651 | ND1 | HIS | A | 338 | -20.238 | 3.847  | 29.288 | 1.00 | 22.04 | N   |
| ATOM | 2652 | CE1 | HIS | A | 338 | -21.007 | 3.394  | 30.267 | 1.00 | 25.17 | C   |
| ATOM | 2653 | NE2 | HIS | A | 338 | -20.844 | 2.087  | 30.358 | 1.00 | 21.03 | N   |
| ATOM | 2654 | N   | PRO | A | 339 | -17.826 | 5.673  | 25.169 | 1.00 | 10.97 | N   |
| ATOM | 2655 | CA  | PRO | A | 339 | -16.623 | 6.285  | 24.652 | 1.00 | 12.13 | C   |
| ATOM | 2656 | C   | PRO | A | 339 | -15.808 | 6.864  | 25.780 | 1.00 | 14.82 | C   |
| ATOM | 2657 | O   | PRO | A | 339 | -14.743 | 7.430  | 25.543 | 1.00 | 16.89 | O   |
| ATOM | 2658 | CB  | PRO | A | 339 | -17.148 | 7.379  | 23.719 | 1.00 | 12.95 | C   |
| ATOM | 2659 | CG  | PRO | A | 339 | -18.636 | 7.237  | 23.705 | 1.00 | 11.47 | C   |
| ATOM | 2660 | CD  | PRO | A | 339 | -18.985 | 6.546  | 24.970 | 1.00 | 12.68 | C   |
| ATOM | 2661 | N   | ASP | A | 340 | -16.335 | 6.799  | 26.998 | 1.00 | 16.39 | N   |
| ATOM | 2662 | CA  | ASP | A | 340 | -15.676 | 7.456  | 28.120 | 1.00 | 17.93 | C   |
| ATOM | 2663 | C   | ASP | A | 340 | -14.888 | 6.494  | 29.012 | 1.00 | 16.22 | C   |
| ATOM | 2664 | O   | ASP | A | 340 | -14.163 | 6.926  | 29.905 | 1.00 | 13.33 | O   |
| ATOM | 2665 | CB  | ASP | A | 340 | -16.689 | 8.324  | 28.916 | 1.00 | 23.67 | C   |
| ATOM | 2666 | CG  | ASP | A | 340 | -17.750 | 7.512  | 29.671 | 1.00 | 28.01 | C   |
| ATOM | 2667 | OD1 | ASP | A | 340 | -18.805 | 7.174  | 29.077 | 1.00 | 27.93 | O   |
| ATOM | 2668 | OD2 | ASP | A | 340 | -17.630 | 7.403  | 30.917 | 1.00 | 31.19 | O1- |
| ATOM | 2669 | N   | TYR | A | 341 | -14.848 | 5.230  | 28.586 | 1.00 | 16.78 | N   |
| ATOM | 2670 | CA  | TYR | A | 341 | -14.063 | 4.179  | 29.225 | 1.00 | 16.62 | C   |
| ATOM | 2671 | C   | TYR | A | 341 | -13.182 | 3.548  | 28.151 | 1.00 | 18.04 | C   |
| ATOM | 2672 | O   | TYR | A | 341 | -13.662 | 3.157  | 27.095 | 1.00 | 19.19 | O   |
| ATOM | 2673 | CB  | TYR | A | 341 | -14.956 | 3.059  | 29.782 | 1.00 | 17.89 | C   |
| ATOM | 2674 | CG  | TYR | A | 341 | -15.863 | 3.378  | 30.973 | 1.00 | 17.57 | C   |
| ATOM | 2675 | CD1 | TYR | A | 341 | -15.606 | 4.437  | 31.821 | 1.00 | 16.92 | C   |
| ATOM | 2676 | CD2 | TYR | A | 341 | -16.915 | 2.536  | 31.290 | 1.00 | 15.97 | C   |
| ATOM | 2677 | CE1 | TYR | A | 341 | -16.361 | 4.638  | 32.959 | 1.00 | 20.41 | C   |
| ATOM | 2678 | CE2 | TYR | A | 341 | -17.666 | 2.723  | 32.406 | 1.00 | 18.32 | C   |
| ATOM | 2679 | CZ  | TYR | A | 341 | -17.393 | 3.772  | 33.260 | 1.00 | 20.96 | C   |
| ATOM | 2680 | OH  | TYR | A | 341 | -18.120 | 3.905  | 34.452 | 1.00 | 18.90 | O   |
| ATOM | 2681 | N   | SER | A | 342 | -11.972 | 3.194  | 28.546 | 1.00 | 19.93 | N   |
| ATOM | 2682 | CA  | SER | A | 342 | -10.979 | 2.592  | 27.668 | 1.00 | 17.81 | C   |
| ATOM | 2683 | C   | SER | A | 342 | -11.334 | 1.153  | 27.386 | 1.00 | 17.13 | C   |
| ATOM | 2684 | O   | SER | A | 342 | -11.554 | 0.401  | 28.331 | 1.00 | 17.80 | O   |
| ATOM | 2685 | CB  | SER | A | 342 | -9.643  | 2.595  | 28.389 | 1.00 | 19.87 | C   |
| ATOM | 2686 | OG  | SER | A | 342 | -9.820  | 2.057  | 29.693 | 1.00 | 17.44 | O   |
| ATOM | 2687 | N   | VAL | A | 343 | -11.037 | 0.712  | 26.168 | 1.00 | 16.67 | N   |
| ATOM | 2688 | CA  | VAL | A | 343 | -11.195 | -0.679 | 25.788 | 1.00 | 15.06 | C   |
| ATOM | 2689 | C   | VAL | A | 343 | -10.570 | -1.594 | 26.815 | 1.00 | 15.29 | C   |
| ATOM | 2690 | O   | VAL | A | 343 | -11.284 | -2.267 | 27.538 | 1.00 | 17.32 | O   |
| ATOM | 2691 | CB  | VAL | A | 343 | -10.601 | -0.964 | 24.386 | 1.00 | 17.69 | C   |
| ATOM | 2692 | CG1 | VAL | A | 343 | -9.194  | -0.425 | 24.270 | 1.00 | 17.11 | C   |
| ATOM | 2693 | CG2 | VAL | A | 343 | -10.638 | -2.460 | 24.091 | 1.00 | 19.44 | C   |
| ATOM | 2694 | N   | VAL | A | 344 | -9.273  | -1.446 | 27.044 | 1.00 | 14.96 | N   |
| ATOM | 2695 | CA  | VAL | A | 344 | -8.571  | -2.281 | 28.013 | 1.00 | 12.81 | C   |
| ATOM | 2696 | C   | VAL | A | 344 | -9.315  | -2.430 | 29.334 | 1.00 | 14.93 | C   |
| ATOM | 2697 | O   | VAL | A | 344 | -9.358  | -3.522 | 29.872 | 1.00 | 16.62 | O   |
| ATOM | 2698 | CB  | VAL | A | 344 | -7.169  | -1.751 | 28.262 | 1.00 | 9.56  | C   |
| ATOM | 2699 | CG1 | VAL | A | 344 | -6.537  | -2.427 | 29.439 | 1.00 | 11.59 | C   |
| ATOM | 2700 | CG2 | VAL | A | 344 | -6.344  | -1.992 | 27.048 | 1.00 | 15.07 | C   |
| ATOM | 2701 | N   | LEU | A | 345 | -10.048 | -1.400 | 29.763 | 1.00 | 16.26 | N   |
| ATOM | 2702 | CA  | LEU | A | 345 | -10.925 | -1.526 | 30.942 | 1.00 | 17.05 | C   |
| ATOM | 2703 | C   | LEU | A | 345 | -12.105 | -2.415 | 30.592 | 1.00 | 15.69 | C   |
| ATOM | 2704 | O   | LEU | A | 345 | -12.294 | -3.481 | 31.172 | 1.00 | 14.48 | O   |
| ATOM | 2705 | CB  | LEU | A | 345 | -11.459 | -0.159 | 31.392 | 1.00 | 18.45 | C   |
| ATOM | 2706 | CG  | LEU | A | 345 | -11.962 | 0.060  | 32.830 | 1.00 | 18.68 | C   |
| ATOM | 2707 | CD1 | LEU | A | 345 | -13.262 | -0.629 | 33.058 | 1.00 | 17.13 | C   |
| ATOM | 2708 | CD2 | LEU | A | 345 | -10.926 | -0.419 | 33.841 | 1.00 | 21.35 | C   |
| ATOM | 2709 | N   | LEU | A | 346 | -12.855 | -1.992 | 29.588 | 1.00 | 14.21 | N   |
| ATOM | 2710 | CA  | LEU | A | 346 | -14.109 | -2.633 | 29.226 | 1.00 | 14.41 | C   |
| ATOM | 2711 | C   | LEU | A | 346 | -13.900 | -4.106 | 28.967 | 1.00 | 15.55 | C   |
| ATOM | 2712 | O   | LEU | A | 346 | -14.832 | -4.889 | 29.076 | 1.00 | 16.56 | O   |
| ATOM | 2713 | CB  | LEU | A | 346 | -14.688 | -1.981 | 27.970 | 1.00 | 14.22 | C   |
| ATOM | 2714 | CG  | LEU | A | 346 | -16.004 | -1.213 | 27.991 | 1.00 | 11.29 | C   |
| ATOM | 2715 | CD1 | LEU | A | 346 | -16.066 | -0.240 | 29.135 | 1.00 | 13.74 | C   |
| ATOM | 2716 | CD2 | LEU | A | 346 | -16.105 | -0.487 | 26.692 | 1.00 | 11.30 | C   |
| ATOM | 2717 | N   | LEU | A | 347 | -12.680 | -4.472 | 28.591 | 1.00 | 17.67 | N   |
| ATOM | 2718 | CA  | LEU | A | 347 | -12.325 | -5.868 | 28.316 | 1.00 | 18.46 | C   |
| ATOM | 2719 | C   | LEU | A | 347 | -12.252 | -6.655 | 29.618 | 1.00 | 18.38 | C   |
| ATOM | 2720 | O   | LEU | A | 347 | -12.542 | -7.844 | 29.626 | 1.00 | 18.38 | O   |
| ATOM | 2721 | CB  | LEU | A | 347 | -10.977 | -5.941 | 27.598 | 1.00 | 18.93 | C   |

|      |      |     |     |   |     |         |         |        |      |       |     |
|------|------|-----|-----|---|-----|---------|---------|--------|------|-------|-----|
| ATOM | 2722 | CG  | LEU | A | 347 | -10.687 | -7.030  | 26.566 | 1.00 | 18.83 | C   |
| ATOM | 2723 | CD1 | LEU | A | 347 | -11.567 | -8.246  | 26.778 | 1.00 | 17.43 | C   |
| ATOM | 2724 | CD2 | LEU | A | 347 | -10.883 | -6.449  | 25.188 | 1.00 | 17.31 | C   |
| ATOM | 2725 | N   | ARG | A | 348 | -11.908 | -5.966  | 30.710 | 1.00 | 18.37 | N   |
| ATOM | 2726 | CA  | ARG | A | 348 | -12.082 | -6.454  | 32.088 | 1.00 | 19.23 | C   |
| ATOM | 2727 | C   | ARG | A | 348 | -13.543 | -6.617  | 32.563 | 1.00 | 19.03 | C   |
| ATOM | 2728 | O   | ARG | A | 348 | -13.821 | -7.463  | 33.423 | 1.00 | 21.17 | O   |
| ATOM | 2729 | CB  | ARG | A | 348 | -11.365 | -5.526  | 33.060 | 1.00 | 17.92 | C   |
| ATOM | 2730 | CG  | ARG | A | 348 | -9.954  | -5.943  | 33.395 | 1.00 | 21.29 | C   |
| ATOM | 2731 | CD  | ARG | A | 348 | -9.199  | -4.790  | 34.054 | 1.00 | 22.78 | C   |
| ATOM | 2732 | NE  | ARG | A | 348 | -7.997  | -5.281  | 34.717 | 1.00 | 25.21 | N   |
| ATOM | 2733 | CZ  | ARG | A | 348 | -7.661  | -5.008  | 35.977 | 1.00 | 26.74 | C   |
| ATOM | 2734 | NH1 | ARG | A | 348 | -8.245  | -4.007  | 36.636 | 1.00 | 24.24 | N1+ |
| ATOM | 2735 | NH2 | ARG | A | 348 | -6.631  | -5.644  | 36.530 | 1.00 | 25.87 | N   |
| ATOM | 2736 | N   | LEU | A | 349 | -14.437 | -5.728  | 32.119 | 1.00 | 15.77 | N   |
| ATOM | 2737 | CA  | LEU | A | 349 | -15.868 | -5.894  | 32.346 | 1.00 | 11.96 | C   |
| ATOM | 2738 | C   | LEU | A | 349 | -16.417 | -7.004  | 31.453 | 1.00 | 14.75 | C   |
| ATOM | 2739 | O   | LEU | A | 349 | -17.446 | -7.619  | 31.748 | 1.00 | 16.02 | O   |
| ATOM | 2740 | CB  | LEU | A | 349 | -16.599 | -4.603  | 32.054 | 1.00 | 6.86  | C   |
| ATOM | 2741 | CG  | LEU | A | 349 | -16.030 | -3.328  | 32.671 | 1.00 | 12.17 | C   |
| ATOM | 2742 | CD1 | LEU | A | 349 | -17.117 | -2.246  | 32.667 | 1.00 | 14.15 | C   |
| ATOM | 2743 | CD2 | LEU | A | 349 | -15.553 | -3.568  | 34.090 | 1.00 | 10.52 | C   |
| ATOM | 2744 | N   | ALA | A | 350 | -15.667 | -7.344  | 30.416 | 1.00 | 15.21 | N   |
| ATOM | 2745 | CA  | ALA | A | 350 | -16.061 | -8.424  | 29.539 | 1.00 | 16.39 | C   |
| ATOM | 2746 | C   | ALA | A | 350 | -15.410 | -9.730  | 29.963 | 1.00 | 17.56 | C   |
| ATOM | 2747 | O   | ALA | A | 350 | -15.616 | -10.767 | 29.332 | 1.00 | 17.63 | O   |
| ATOM | 2748 | CB  | ALA | A | 350 | -15.695 | -8.084  | 28.116 | 1.00 | 17.35 | C   |
| ATOM | 2749 | N   | LYS | A | 351 | -14.654 | -9.688  | 31.057 | 1.00 | 19.16 | N   |
| ATOM | 2750 | CA  | LYS | A | 351 | -14.267 | -10.913 | 31.747 | 1.00 | 20.56 | C   |
| ATOM | 2751 | C   | LYS | A | 351 | -14.763 | -11.048 | 33.166 | 1.00 | 20.35 | C   |
| ATOM | 2752 | O   | LYS | A | 351 | -14.523 | -12.083 | 33.770 | 1.00 | 20.19 | O   |
| ATOM | 2753 | CB  | LYS | A | 351 | -12.756 | -11.122 | 31.726 | 1.00 | 23.48 | C   |
| ATOM | 2754 | CG  | LYS | A | 351 | -12.300 | -12.152 | 30.682 | 1.00 | 29.67 | C   |
| ATOM | 2755 | CD  | LYS | A | 351 | -12.868 | -11.815 | 29.274 | 1.00 | 33.17 | C   |
| ATOM | 2756 | CE  | LYS | A | 351 | -11.936 | -12.235 | 28.116 | 1.00 | 33.44 | C   |
| ATOM | 2757 | NZ  | LYS | A | 351 | -12.007 | -11.236 | 26.983 | 1.00 | 31.75 | N1+ |
| ATOM | 2758 | N   | THR | A | 352 | -15.548 | -10.079 | 33.651 | 1.00 | 22.45 | N   |
| ATOM | 2759 | CA  | THR | A | 352 | -16.326 | -10.254 | 34.892 | 1.00 | 25.02 | C   |
| ATOM | 2760 | C   | THR | A | 352 | -17.850 | -10.434 | 34.671 | 1.00 | 27.15 | C   |
| ATOM | 2761 | O   | THR | A | 352 | -18.596 | -10.768 | 35.590 | 1.00 | 28.15 | O   |
| ATOM | 2762 | CB  | THR | A | 352 | -16.105 | -9.093  | 35.854 | 1.00 | 25.24 | C   |
| ATOM | 2763 | CG2 | THR | A | 352 | -16.302 | -9.557  | 37.305 | 1.00 | 25.36 | C   |
| ATOM | 2764 | OG1 | THR | A | 352 | -14.772 | -8.583  | 35.690 | 1.00 | 27.53 | O   |
| ATOM | 2765 | N   | TYR | A | 353 | -18.314 | -10.227 | 33.443 | 1.00 | 28.56 | N   |
| ATOM | 2766 | CA  | TYR | A | 353 | -19.436 | -11.009 | 32.951 | 1.00 | 27.35 | C   |
| ATOM | 2767 | C   | TYR | A | 353 | -18.988 | -12.487 | 32.781 | 1.00 | 28.05 | C   |
| ATOM | 2768 | O   | TYR | A | 353 | -19.141 | -13.277 | 33.718 | 1.00 | 29.94 | O   |
| ATOM | 2769 | CB  | TYR | A | 353 | -19.942 | -10.427 | 31.629 | 1.00 | 25.44 | C   |
| ATOM | 2770 | CG  | TYR | A | 353 | -21.447 | -10.511 | 31.448 | 1.00 | 24.45 | C   |
| ATOM | 2771 | CD1 | TYR | A | 353 | -22.327 | -10.076 | 32.455 | 1.00 | 21.15 | C   |
| ATOM | 2772 | CD2 | TYR | A | 353 | -21.991 | -11.122 | 30.316 | 1.00 | 22.41 | C   |
| ATOM | 2773 | CE1 | TYR | A | 353 | -23.705 | -10.270 | 32.338 | 1.00 | 18.94 | C   |
| ATOM | 2774 | CE2 | TYR | A | 353 | -23.364 | -11.318 | 30.195 | 1.00 | 19.82 | C   |
| ATOM | 2775 | CZ  | TYR | A | 353 | -24.208 | -10.906 | 31.206 | 1.00 | 19.86 | C   |
| ATOM | 2776 | OH  | TYR | A | 353 | -25.525 | -11.262 | 31.124 | 1.00 | 18.86 | O   |
| ATOM | 2777 | N   | GLU | A | 354 | -18.244 | -12.794 | 31.714 | 1.00 | 25.58 | N   |
| ATOM | 2778 | CA  | GLU | A | 354 | -17.941 | -14.192 | 31.332 | 1.00 | 24.34 | C   |
| ATOM | 2779 | C   | GLU | A | 354 | -17.618 | -15.178 | 32.445 | 1.00 | 23.15 | C   |
| ATOM | 2780 | O   | GLU | A | 354 | -17.902 | -16.361 | 32.315 | 1.00 | 21.79 | O   |
| ATOM | 2781 | CB  | GLU | A | 354 | -16.774 | -14.261 | 30.346 | 1.00 | 25.14 | C   |
| ATOM | 2782 | CG  | GLU | A | 354 | -16.485 | -15.694 | 29.867 | 1.00 | 24.30 | C   |
| ATOM | 2783 | CD  | GLU | A | 354 | -15.011 | -16.006 | 29.672 | 1.00 | 23.93 | C   |
| ATOM | 2784 | OE1 | GLU | A | 354 | -14.145 | -15.338 | 30.288 | 1.00 | 22.57 | O   |
| ATOM | 2785 | OE2 | GLU | A | 354 | -14.727 | -16.952 | 28.905 | 1.00 | 22.72 | O1- |
| ATOM | 2786 | N   | THR | A | 355 | -16.746 | -14.776 | 33.353 | 1.00 | 22.89 | N   |
| ATOM | 2787 | CA  | THR | A | 355 | -16.424 | -15.652 | 34.455 | 1.00 | 21.39 | C   |
| ATOM | 2788 | C   | THR | A | 355 | -17.689 | -15.821 | 35.259 | 1.00 | 23.76 | C   |
| ATOM | 2789 | O   | THR | A | 355 | -18.292 | -16.908 | 35.252 | 1.00 | 24.10 | O   |
| ATOM | 2790 | CB  | THR | A | 355 | -15.414 | -15.041 | 35.375 | 1.00 | 22.64 | C   |
| ATOM | 2791 | CG2 | THR | A | 355 | -14.930 | -16.101 | 36.358 | 1.00 | 23.56 | C   |
| ATOM | 2792 | OG1 | THR | A | 355 | -14.333 | -14.484 | 34.609 | 1.00 | 23.91 | O   |



|      |      |     |     |   |     |         |         |        |      |       |     |
|------|------|-----|-----|---|-----|---------|---------|--------|------|-------|-----|
| ATOM | 2793 | N   | THR | A | 356 | -18.140 | -14.704 | 35.852 | 1.00 | 23.40 | N   |
| ATOM | 2794 | CA  | THR | A | 356 | -19.244 | -14.695 | 36.812 | 1.00 | 23.16 | C   |
| ATOM | 2795 | C   | THR | A | 356 | -20.470 | -15.421 | 36.293 | 1.00 | 22.64 | C   |
| ATOM | 2796 | O   | THR | A | 356 | -20.910 | -16.389 | 36.901 | 1.00 | 24.94 | O   |
| ATOM | 2797 | CB  | THR | A | 356 | -19.636 | -13.257 | 37.216 | 1.00 | 24.04 | C   |
| ATOM | 2798 | CG2 | THR | A | 356 | -21.004 | -13.225 | 37.905 | 1.00 | 21.12 | C   |
| ATOM | 2799 | OG1 | THR | A | 356 | -18.647 | -12.740 | 38.121 | 1.00 | 28.79 | O   |
| ATOM | 2800 | N   | LEU | A | 357 | -20.936 | -15.060 | 35.105 | 1.00 | 19.87 | N   |
| ATOM | 2801 | CA  | LEU | A | 357 | -22.092 | -15.724 | 34.542 | 1.00 | 16.07 | C   |
| ATOM | 2802 | C   | LEU | A | 357 | -21.893 | -17.215 | 34.408 | 1.00 | 16.68 | C   |
| ATOM | 2803 | O   | LEU | A | 357 | -22.844 | -17.937 | 34.102 | 1.00 | 16.65 | O   |
| ATOM | 2804 | CB  | LEU | A | 357 | -22.428 | -15.140 | 33.189 | 1.00 | 13.80 | C   |
| ATOM | 2805 | CG  | LEU | A | 357 | -23.662 | -14.274 | 33.305 | 1.00 | 14.12 | C   |
| ATOM | 2806 | CD1 | LEU | A | 357 | -23.278 | -12.964 | 33.979 | 1.00 | 11.35 | C   |
| ATOM | 2807 | CD2 | LEU | A | 357 | -24.275 | -14.076 | 31.936 | 1.00 | 9.43  | C   |
| ATOM | 2808 | N   | GLU | A | 358 | -20.639 | -17.653 | 34.510 | 1.00 | 18.54 | N   |
| ATOM | 2809 | CA  | GLU | A | 358 | -20.306 | -19.077 | 34.509 | 1.00 | 22.18 | C   |
| ATOM | 2810 | C   | GLU | A | 358 | -20.175 | -19.565 | 35.932 | 1.00 | 23.29 | C   |
| ATOM | 2811 | O   | GLU | A | 358 | -20.495 | -20.722 | 36.210 | 1.00 | 25.03 | O   |
| ATOM | 2812 | CB  | GLU | A | 358 | -19.004 | -19.353 | 33.731 | 1.00 | 25.37 | C   |
| ATOM | 2813 | CG  | GLU | A | 358 | -19.208 | -20.016 | 32.329 | 1.00 | 29.81 | C   |
| ATOM | 2814 | CD  | GLU | A | 358 | -19.717 | -19.054 | 31.220 | 1.00 | 30.46 | C   |
| ATOM | 2815 | OE1 | GLU | A | 358 | -18.859 | -18.380 | 30.586 | 1.00 | 30.40 | O   |
| ATOM | 2816 | OE2 | GLU | A | 358 | -20.946 | -19.046 | 30.925 | 1.00 | 25.21 | O1- |
| ATOM | 2817 | N   | LYS | A | 359 | -19.818 | -18.642 | 36.833 | 1.00 | 22.28 | N   |
| ATOM | 2818 | CA  | LYS | A | 359 | -19.902 | -18.823 | 38.294 | 1.00 | 21.07 | C   |
| ATOM | 2819 | C   | LYS | A | 359 | -21.329 | -19.097 | 38.762 | 1.00 | 21.42 | C   |
| ATOM | 2820 | O   | LYS | A | 359 | -21.543 | -19.518 | 39.903 | 1.00 | 21.98 | O   |
| ATOM | 2821 | CB  | LYS | A | 359 | -19.409 | -17.562 | 39.021 | 1.00 | 20.11 | C   |
| ATOM | 2822 | CG  | LYS | A | 359 | -18.134 | -17.700 | 39.848 | 1.00 | 22.37 | C   |
| ATOM | 2823 | CD  | LYS | A | 359 | -17.703 | -19.159 | 40.055 | 1.00 | 24.00 | C   |
| ATOM | 2824 | CE  | LYS | A | 359 | -16.830 | -19.349 | 41.307 | 1.00 | 24.54 | C   |
| ATOM | 2825 | NZ  | LYS | A | 359 | -17.624 | -19.380 | 42.606 | 1.00 | 21.49 | N1+ |
| ATOM | 2826 | N   | CYS | A | 360 | -22.304 | -18.705 | 37.946 | 1.00 | 22.87 | N   |
| ATOM | 2827 | CA  | CYS | A | 360 | -23.709 | -18.847 | 38.318 | 1.00 | 24.14 | C   |
| ATOM | 2828 | C   | CYS | A | 360 | -24.710 | -18.775 | 37.158 | 1.00 | 23.71 | C   |
| ATOM | 2829 | O   | CYS | A | 360 | -25.613 | -17.929 | 37.133 | 1.00 | 24.52 | O   |
| ATOM | 2830 | CB  | CYS | A | 360 | -24.057 | -17.808 | 39.374 | 1.00 | 24.78 | C   |
| ATOM | 2831 | SG  | CYS | A | 360 | -22.748 | -16.563 | 39.608 | 1.00 | 26.85 | S   |
| ATOM | 2832 | N   | CYS | A | 361 | -24.405 | -19.527 | 36.113 | 1.00 | 22.64 | N   |
| ATOM | 2833 | CA  | CYS | A | 361 | -25.419 | -20.138 | 35.292 | 1.00 | 22.37 | C   |
| ATOM | 2834 | C   | CYS | A | 361 | -25.485 | -21.605 | 35.702 | 1.00 | 23.29 | C   |
| ATOM | 2835 | O   | CYS | A | 361 | -26.339 | -22.359 | 35.231 | 1.00 | 23.57 | O   |
| ATOM | 2836 | CB  | CYS | A | 361 | -25.025 | -20.055 | 33.828 | 1.00 | 23.14 | C   |
| ATOM | 2837 | SG  | CYS | A | 361 | -26.368 | -19.332 | 32.880 | 1.00 | 26.83 | S   |
| ATOM | 2838 | N   | ALA | A | 362 | -24.508 | -22.030 | 36.497 | 1.00 | 23.59 | N   |
| ATOM | 2839 | CA  | ALA | A | 362 | -24.434 | -23.405 | 36.944 | 1.00 | 25.12 | C   |
| ATOM | 2840 | C   | ALA | A | 362 | -25.368 | -23.670 | 38.107 | 1.00 | 25.80 | C   |
| ATOM | 2841 | O   | ALA | A | 362 | -26.545 | -23.951 | 37.901 | 1.00 | 26.67 | O   |
| ATOM | 2842 | CB  | ALA | A | 362 | -22.999 | -23.748 | 37.342 | 1.00 | 27.30 | C   |
| ATOM | 2843 | N   | ALA | A | 363 | -24.858 | -23.502 | 39.326 | 1.00 | 23.91 | N   |
| ATOM | 2844 | CA  | ALA | A | 363 | -25.445 | -24.155 | 40.488 | 1.00 | 26.21 | C   |
| ATOM | 2845 | C   | ALA | A | 363 | -26.359 | -23.304 | 41.386 | 1.00 | 26.42 | C   |
| ATOM | 2846 | O   | ALA | A | 363 | -26.234 | -22.069 | 41.407 | 1.00 | 24.96 | O   |
| ATOM | 2847 | CB  | ALA | A | 363 | -24.331 | -24.804 | 41.343 | 1.00 | 25.36 | C   |
| ATOM | 2848 | N   | ALA | A | 364 | -27.415 | -23.948 | 41.912 | 1.00 | 28.14 | N   |
| ATOM | 2849 | CA  | ALA | A | 364 | -28.010 | -23.673 | 43.236 | 1.00 | 31.01 | C   |
| ATOM | 2850 | C   | ALA | A | 364 | -28.676 | -22.323 | 43.366 | 1.00 | 32.95 | C   |
| ATOM | 2851 | O   | ALA | A | 364 | -28.424 | -21.582 | 44.343 | 1.00 | 33.01 | O   |
| ATOM | 2852 | CB  | ALA | A | 364 | -26.941 | -23.792 | 44.302 | 1.00 | 32.09 | C   |
| ATOM | 2853 | N   | ASP | A | 365 | -29.630 | -22.080 | 42.470 | 1.00 | 33.49 | N   |
| ATOM | 2854 | CA  | ASP | A | 365 | -30.065 | -20.719 | 42.092 | 1.00 | 32.31 | C   |
| ATOM | 2855 | C   | ASP | A | 365 | -30.308 | -19.789 | 43.290 | 1.00 | 34.06 | C   |
| ATOM | 2856 | O   | ASP | A | 365 | -30.266 | -20.216 | 44.442 | 1.00 | 35.19 | O   |
| ATOM | 2857 | CB  | ASP | A | 365 | -31.305 | -20.839 | 41.165 | 1.00 | 30.17 | C   |
| ATOM | 2858 | CG  | ASP | A | 365 | -32.215 | -21.973 | 41.556 | 1.00 | 27.56 | C   |
| ATOM | 2859 | OD1 | ASP | A | 365 | -32.811 | -21.879 | 42.644 | 1.00 | 25.00 | O   |
| ATOM | 2860 | OD2 | ASP | A | 365 | -32.379 | -22.899 | 40.741 | 1.00 | 24.35 | O1- |
| ATOM | 2861 | N   | PRO | A | 366 | -30.401 | -18.469 | 43.078 | 1.00 | 34.76 | N   |
| ATOM | 2862 | CA  | PRO | A | 366 | -31.123 | -17.957 | 41.922 | 1.00 | 34.85 | C   |
| ATOM | 2863 | C   | PRO | A | 366 | -30.281 | -16.923 | 41.199 | 1.00 | 35.81 | C   |

|      |      |     |     |   |     |         |         |        |      |       |     |
|------|------|-----|-----|---|-----|---------|---------|--------|------|-------|-----|
| ATOM | 2864 | O   | PRO | A | 366 | -29.071 | -17.095 | 41.054 | 1.00 | 36.75 | O   |
| ATOM | 2865 | CB  | PRO | A | 366 | -32.402 | -17.379 | 42.539 | 1.00 | 33.58 | C   |
| ATOM | 2866 | CG  | PRO | A | 366 | -31.998 | -16.969 | 43.986 | 1.00 | 34.17 | C   |
| ATOM | 2867 | CD  | PRO | A | 366 | -30.585 | -17.580 | 44.243 | 1.00 | 35.22 | C   |
| ATOM | 2868 | N   | HIS | A | 367 | -30.879 | -15.760 | 40.952 | 1.00 | 35.99 | N   |
| ATOM | 2869 | CA  | HIS | A | 367 | -30.318 | -14.767 | 40.058 | 1.00 | 32.68 | C   |
| ATOM | 2870 | C   | HIS | A | 367 | -29.370 | -13.770 | 40.677 | 1.00 | 32.19 | C   |
| ATOM | 2871 | O   | HIS | A | 367 | -28.438 | -13.300 | 40.019 | 1.00 | 32.60 | O   |
| ATOM | 2872 | CB  | HIS | A | 367 | -31.447 | -14.017 | 39.383 | 1.00 | 30.02 | C   |
| ATOM | 2873 | CG  | HIS | A | 367 | -31.860 | -14.638 | 38.108 | 1.00 | 25.99 | C   |
| ATOM | 2874 | CD2 | HIS | A | 367 | -32.718 | -14.223 | 37.152 | 1.00 | 26.12 | C   |
| ATOM | 2875 | ND1 | HIS | A | 367 | -31.248 | -15.773 | 37.620 | 1.00 | 25.25 | N   |
| ATOM | 2876 | CE1 | HIS | A | 367 | -31.706 | -16.026 | 36.408 | 1.00 | 27.08 | C   |
| ATOM | 2877 | NE2 | HIS | A | 367 | -32.598 | -15.099 | 36.097 | 1.00 | 29.00 | N   |
| ATOM | 2878 | N   | GLU | A | 368 | -29.538 | -13.526 | 41.962 | 1.00 | 30.39 | N   |
| ATOM | 2879 | CA  | GLU | A | 368 | -28.843 | -12.426 | 42.577 | 1.00 | 29.24 | C   |
| ATOM | 2880 | C   | GLU | A | 368 | -27.331 | -12.453 | 42.287 | 1.00 | 28.13 | C   |
| ATOM | 2881 | O   | GLU | A | 368 | -26.729 | -11.384 | 42.163 | 1.00 | 26.88 | O   |
| ATOM | 2882 | CB  | GLU | A | 368 | -29.136 | -12.413 | 44.090 | 1.00 | 29.55 | C   |
| ATOM | 2883 | CG  | GLU | A | 368 | -30.634 | -12.566 | 44.422 | 1.00 | 25.73 | C   |
| ATOM | 2884 | CD  | GLU | A | 368 | -31.265 | -11.300 | 44.974 | 1.00 | 24.58 | C   |
| ATOM | 2885 | OE1 | GLU | A | 368 | -30.521 | -10.338 | 45.266 | 1.00 | 25.16 | O   |
| ATOM | 2886 | OE2 | GLU | A | 368 | -32.498 | -11.296 | 45.176 | 1.00 | 21.06 | O1- |
| ATOM | 2887 | N   | CYS | A | 369 | -26.758 | -13.638 | 42.021 | 1.00 | 26.26 | N   |
| ATOM | 2888 | CA  | CYS | A | 369 | -25.313 | -13.757 | 41.759 | 1.00 | 24.90 | C   |
| ATOM | 2889 | C   | CYS | A | 369 | -24.874 | -12.701 | 40.778 | 1.00 | 25.23 | C   |
| ATOM | 2890 | O   | CYS | A | 369 | -23.911 | -12.003 | 41.032 | 1.00 | 25.76 | O   |
| ATOM | 2891 | CB  | CYS | A | 369 | -24.941 | -15.093 | 41.136 | 1.00 | 25.85 | C   |
| ATOM | 2892 | SG  | CYS | A | 369 | -23.840 | -14.850 | 39.683 | 1.00 | 28.33 | S   |
| ATOM | 2893 | N   | TYR | A | 370 | -25.488 | -12.721 | 39.593 | 1.00 | 24.71 | N   |
| ATOM | 2894 | CA  | TYR | A | 370 | -25.245 | -11.722 | 38.563 | 1.00 | 23.51 | C   |
| ATOM | 2895 | C   | TYR | A | 370 | -26.029 | -10.420 | 38.757 | 1.00 | 24.62 | C   |
| ATOM | 2896 | O   | TYR | A | 370 | -25.953 | -9.523  | 37.906 | 1.00 | 23.98 | O   |
| ATOM | 2897 | CB  | TYR | A | 370 | -25.537 | -12.308 | 37.178 | 1.00 | 24.52 | C   |
| ATOM | 2898 | CG  | TYR | A | 370 | -26.989 | -12.560 | 36.798 | 1.00 | 22.90 | C   |
| ATOM | 2899 | CD1 | TYR | A | 370 | -27.771 | -11.529 | 36.277 | 1.00 | 24.94 | C   |
| ATOM | 2900 | CD2 | TYR | A | 370 | -27.445 | -13.861 | 36.605 | 1.00 | 22.80 | C   |
| ATOM | 2901 | CE1 | TYR | A | 370 | -28.942 | -11.789 | 35.548 | 1.00 | 23.26 | C   |
| ATOM | 2902 | CE2 | TYR | A | 370 | -28.605 | -14.126 | 35.880 | 1.00 | 21.68 | C   |
| ATOM | 2903 | CZ  | TYR | A | 370 | -29.347 | -13.085 | 35.357 | 1.00 | 22.31 | C   |
| ATOM | 2904 | OH  | TYR | A | 370 | -30.530 | -13.345 | 34.705 | 1.00 | 19.63 | O   |
| ATOM | 2905 | N   | ALA | A | 371 | -26.806 | -10.341 | 39.843 | 1.00 | 22.53 | N   |
| ATOM | 2906 | CA  | ALA | A | 371 | -27.517 | -9.121  | 40.212 | 1.00 | 20.95 | C   |
| ATOM | 2907 | C   | ALA | A | 371 | -26.534 | -8.002  | 40.483 | 1.00 | 21.22 | C   |
| ATOM | 2908 | O   | ALA | A | 371 | -25.767 | -8.032  | 41.452 | 1.00 | 18.20 | O   |
| ATOM | 2909 | CB  | ALA | A | 371 | -28.392 | -9.347  | 41.437 | 1.00 | 20.29 | C   |
| ATOM | 2910 | N   | LYS | A | 372 | -26.618 | -6.979  | 39.644 | 1.00 | 23.07 | N   |
| ATOM | 2911 | CA  | LYS | A | 372 | -25.638 | -5.897  | 39.648 | 1.00 | 26.70 | C   |
| ATOM | 2912 | C   | LYS | A | 372 | -24.221 | -6.384  | 39.978 | 1.00 | 28.46 | C   |
| ATOM | 2913 | O   | LYS | A | 372 | -23.624 | -5.993  | 41.000 | 1.00 | 26.84 | O   |
| ATOM | 2914 | CB  | LYS | A | 372 | -26.041 | -4.787  | 40.619 | 1.00 | 25.91 | C   |
| ATOM | 2915 | CG  | LYS | A | 372 | -27.377 | -4.140  | 40.291 | 1.00 | 25.48 | C   |
| ATOM | 2916 | CD  | LYS | A | 372 | -27.886 | -3.362  | 41.489 | 1.00 | 21.87 | C   |
| ATOM | 2917 | CE  | LYS | A | 372 | -26.866 | -2.361  | 41.922 | 1.00 | 18.47 | C   |
| ATOM | 2918 | NZ  | LYS | A | 372 | -26.407 | -1.618  | 40.728 | 1.00 | 20.65 | N1+ |
| ATOM | 2919 | N   | VAL | A | 373 | -23.710 | -7.262  | 39.109 | 1.00 | 27.77 | N   |
| ATOM | 2920 | CA  | VAL | A | 373 | -22.311 | -7.224  | 38.739 | 1.00 | 24.92 | C   |
| ATOM | 2921 | C   | VAL | A | 373 | -21.958 | -5.773  | 38.482 | 1.00 | 24.34 | C   |
| ATOM | 2922 | O   | VAL | A | 373 | -20.982 | -5.276  | 39.007 | 1.00 | 23.37 | O   |
| ATOM | 2923 | CB  | VAL | A | 373 | -22.036 | -8.008  | 37.459 | 1.00 | 25.87 | C   |
| ATOM | 2924 | CG1 | VAL | A | 373 | -21.594 | -9.423  | 37.811 | 1.00 | 27.81 | C   |
| ATOM | 2925 | CG2 | VAL | A | 373 | -23.271 | -8.017  | 36.564 | 1.00 | 25.54 | C   |
| ATOM | 2926 | N   | PHE | A | 374 | -22.878 | -5.047  | 37.856 | 1.00 | 25.35 | N   |
| ATOM | 2927 | CA  | PHE | A | 374 | -22.738 | -3.597  | 37.666 | 1.00 | 25.95 | C   |
| ATOM | 2928 | C   | PHE | A | 374 | -22.261 | -2.928  | 38.950 | 1.00 | 26.20 | C   |
| ATOM | 2929 | O   | PHE | A | 374 | -21.593 | -1.880  | 38.921 | 1.00 | 21.77 | O   |
| ATOM | 2930 | CB  | PHE | A | 374 | -24.083 | -2.995  | 37.222 | 1.00 | 25.29 | C   |
| ATOM | 2931 | CG  | PHE | A | 374 | -24.338 | -3.095  | 35.744 | 1.00 | 24.61 | C   |
| ATOM | 2932 | CD1 | PHE | A | 374 | -23.850 | -4.157  | 35.010 | 1.00 | 25.83 | C   |
| ATOM | 2933 | CD2 | PHE | A | 374 | -25.029 | -2.096  | 35.083 | 1.00 | 27.32 | C   |
| ATOM | 2934 | CE1 | PHE | A | 374 | -24.043 | -4.218  | 33.648 | 1.00 | 27.69 | C   |

|      |      |     |     |   |     |         |        |        |      |       |     |
|------|------|-----|-----|---|-----|---------|--------|--------|------|-------|-----|
| ATOM | 2935 | CE2 | PHE | A | 374 | -25.224 | -2.145 | 33.714 | 1.00 | 26.77 | C   |
| ATOM | 2936 | CZ  | PHE | A | 374 | -24.731 | -3.208 | 32.999 | 1.00 | 27.96 | C   |
| ATOM | 2937 | N   | ASP | A | 375 | -22.562 | -3.601 | 40.064 | 1.00 | 29.26 | N   |
| ATOM | 2938 | CA  | ASP | A | 375 | -22.212 | -3.148 | 41.409 | 1.00 | 31.59 | C   |
| ATOM | 2939 | C   | ASP | A | 375 | -21.374 | -4.155 | 42.225 | 1.00 | 29.82 | C   |
| ATOM | 2940 | O   | ASP | A | 375 | -21.614 | -4.358 | 43.415 | 1.00 | 29.59 | O   |
| ATOM | 2941 | CB  | ASP | A | 375 | -23.477 | -2.747 | 42.176 | 1.00 | 31.39 | C   |
| ATOM | 2942 | CG  | ASP | A | 375 | -23.954 | -1.340 | 41.817 | 1.00 | 32.35 | C   |
| ATOM | 2943 | OD1 | ASP | A | 375 | -23.865 | -0.935 | 40.627 | 1.00 | 30.78 | O   |
| ATOM | 2944 | OD2 | ASP | A | 375 | -24.511 | -0.658 | 42.715 | 1.00 | 36.30 | O1- |
| ATOM | 2945 | N   | GLU | A | 376 | -20.457 | -4.836 | 41.539 | 1.00 | 28.50 | N   |
| ATOM | 2946 | CA  | GLU | A | 376 | -19.115 | -5.035 | 42.053 | 1.00 | 26.94 | C   |
| ATOM | 2947 | C   | GLU | A | 376 | -18.043 | -5.009 | 40.962 | 1.00 | 26.28 | C   |
| ATOM | 2948 | O   | GLU | A | 376 | -16.887 | -5.333 | 41.245 | 1.00 | 28.07 | O   |
| ATOM | 2949 | CB  | GLU | A | 376 | -19.002 | -6.334 | 42.848 | 1.00 | 29.11 | C   |
| ATOM | 2950 | CG  | GLU | A | 376 | -19.509 | -7.591 | 42.165 | 1.00 | 29.86 | C   |
| ATOM | 2951 | CD  | GLU | A | 376 | -18.961 | -7.787 | 40.769 | 1.00 | 28.06 | C   |
| ATOM | 2952 | OE1 | GLU | A | 376 | -17.736 | -7.935 | 40.608 | 1.00 | 29.85 | O   |
| ATOM | 2953 | OE2 | GLU | A | 376 | -19.768 | -7.812 | 39.828 | 1.00 | 27.54 | O1- |
| ATOM | 2954 | N   | PHE | A | 377 | -18.435 | -4.748 | 39.709 | 1.00 | 21.99 | N   |
| ATOM | 2955 | CA  | PHE | A | 377 | -17.479 | -4.330 | 38.674 | 1.00 | 17.15 | C   |
| ATOM | 2956 | C   | PHE | A | 377 | -16.712 | -3.219 | 39.354 | 1.00 | 17.60 | C   |
| ATOM | 2957 | O   | PHE | A | 377 | -15.582 | -3.419 | 39.769 | 1.00 | 18.80 | O   |
| ATOM | 2958 | CB  | PHE | A | 377 | -18.158 | -3.679 | 37.448 | 1.00 | 14.09 | C   |
| ATOM | 2959 | CG  | PHE | A | 377 | -18.727 | -4.640 | 36.433 | 1.00 | 5.40  | C   |
| ATOM | 2960 | CD1 | PHE | A | 377 | -18.294 | -5.932 | 36.335 | 1.00 | 3.20  | C   |
| ATOM | 2961 | CD2 | PHE | A | 377 | -19.749 | -4.233 | 35.616 | 1.00 | 2.00  | C   |
| ATOM | 2962 | CE1 | PHE | A | 377 | -18.883 | -6.791 | 35.456 | 1.00 | 2.00  | C   |
| ATOM | 2963 | CE2 | PHE | A | 377 | -20.325 | -5.088 | 34.742 | 1.00 | 2.00  | C   |
| ATOM | 2964 | CZ  | PHE | A | 377 | -19.896 | -6.362 | 34.666 | 1.00 | 2.00  | C   |
| ATOM | 2965 | N   | LYS | A | 378 | -17.484 | -2.219 | 39.775 | 1.00 | 17.81 | N   |
| ATOM | 2966 | CA  | LYS | A | 378 | -17.005 | -0.869 | 40.084 | 1.00 | 17.26 | C   |
| ATOM | 2967 | C   | LYS | A | 378 | -15.683 | -0.699 | 40.831 | 1.00 | 15.51 | C   |
| ATOM | 2968 | O   | LYS | A | 378 | -15.089 | 0.362  | 40.777 | 1.00 | 14.50 | O   |
| ATOM | 2969 | CB  | LYS | A | 378 | -18.106 | -0.082 | 40.813 | 1.00 | 17.88 | C   |
| ATOM | 2970 | CG  | LYS | A | 378 | -17.952 | 1.453  | 40.765 | 1.00 | 18.67 | C   |
| ATOM | 2971 | CD  | LYS | A | 378 | -19.143 | 2.216  | 41.408 | 1.00 | 16.76 | C   |
| ATOM | 2972 | CE  | LYS | A | 378 | -19.247 | 2.011  | 42.921 | 1.00 | 15.54 | C   |
| ATOM | 2973 | NZ  | LYS | A | 378 | -19.884 | 0.728  | 43.329 | 1.00 | 9.93  | N1+ |
| ATOM | 2974 | N   | PRO | A | 379 | -15.161 | -1.749 | 41.468 | 1.00 | 15.24 | N   |
| ATOM | 2975 | CA  | PRO | A | 379 | -13.732 | -1.558 | 41.696 | 1.00 | 17.61 | C   |
| ATOM | 2976 | C   | PRO | A | 379 | -12.965 | -1.316 | 40.391 | 1.00 | 19.67 | C   |
| ATOM | 2977 | O   | PRO | A | 379 | -12.378 | -0.234 | 40.207 | 1.00 | 20.74 | O   |
| ATOM | 2978 | CB  | PRO | A | 379 | -13.302 | -2.852 | 42.408 | 1.00 | 17.69 | C   |
| ATOM | 2979 | CG  | PRO | A | 379 | -14.565 | -3.698 | 42.537 | 1.00 | 15.99 | C   |
| ATOM | 2980 | CD  | PRO | A | 379 | -15.707 | -2.740 | 42.404 | 1.00 | 15.75 | C   |
| ATOM | 2981 | N   | LEU | A | 380 | -13.078 | -2.261 | 39.450 | 1.00 | 18.64 | N   |
| ATOM | 2982 | CA  | LEU | A | 380 | -12.334 | -2.227 | 38.183 | 1.00 | 16.78 | C   |
| ATOM | 2983 | C   | LEU | A | 380 | -12.899 | -1.233 | 37.170 | 1.00 | 16.37 | C   |
| ATOM | 2984 | O   | LEU | A | 380 | -13.224 | -1.618 | 36.052 | 1.00 | 15.89 | O   |
| ATOM | 2985 | CB  | LEU | A | 380 | -12.274 | -3.625 | 37.545 | 1.00 | 12.95 | C   |
| ATOM | 2986 | CG  | LEU | A | 380 | -13.247 | -4.733 | 37.928 | 1.00 | 11.61 | C   |
| ATOM | 2987 | CD1 | LEU | A | 380 | -13.959 | -5.227 | 36.703 | 1.00 | 10.69 | C   |
| ATOM | 2988 | CD2 | LEU | A | 380 | -12.504 | -5.870 | 38.586 | 1.00 | 10.18 | C   |
| ATOM | 2989 | N   | VAL | A | 381 | -13.112 | 0.004  | 37.626 | 1.00 | 16.46 | N   |
| ATOM | 2990 | CA  | VAL | A | 381 | -13.610 | 1.151  | 36.844 | 1.00 | 16.90 | C   |
| ATOM | 2991 | C   | VAL | A | 381 | -13.242 | 2.411  | 37.648 | 1.00 | 17.54 | C   |
| ATOM | 2992 | O   | VAL | A | 381 | -13.279 | 3.526  | 37.143 | 1.00 | 18.24 | O   |
| ATOM | 2993 | CB  | VAL | A | 381 | -15.167 | 1.160  | 36.674 | 1.00 | 16.00 | C   |
| ATOM | 2994 | CG1 | VAL | A | 381 | -15.587 | 2.360  | 35.866 | 1.00 | 15.15 | C   |
| ATOM | 2995 | CG2 | VAL | A | 381 | -15.668 | -0.096 | 35.995 | 1.00 | 15.14 | C   |
| ATOM | 2996 | N   | GLU | A | 382 | -12.936 | 2.228  | 38.926 | 1.00 | 19.02 | N   |
| ATOM | 2997 | CA  | GLU | A | 382 | -12.424 | 3.318  | 39.744 | 1.00 | 20.65 | C   |
| ATOM | 2998 | C   | GLU | A | 382 | -10.913 | 3.520  | 39.525 | 1.00 | 19.24 | C   |
| ATOM | 2999 | O   | GLU | A | 382 | -10.503 | 4.596  | 39.114 | 1.00 | 18.63 | O   |
| ATOM | 3000 | CB  | GLU | A | 382 | -12.740 | 3.080  | 41.245 | 1.00 | 24.33 | C   |
| ATOM | 3001 | CG  | GLU | A | 382 | -14.261 | 3.175  | 41.666 | 1.00 | 22.93 | C   |
| ATOM | 3002 | CD  | GLU | A | 382 | -14.712 | 4.589  | 42.012 | 1.00 | 23.13 | C   |
| ATOM | 3003 | OE1 | GLU | A | 382 | -13.975 | 5.273  | 42.751 | 1.00 | 26.43 | O   |
| ATOM | 3004 | OE2 | GLU | A | 382 | -15.776 | 5.038  | 41.527 | 1.00 | 21.00 | O1- |
| ATOM | 3005 | N   | GLU | A | 383 | -10.115 | 2.456  | 39.602 | 1.00 | 20.27 | N   |

|      |      |     |     |   |     |         |        |        |      |       |     |
|------|------|-----|-----|---|-----|---------|--------|--------|------|-------|-----|
| ATOM | 3006 | CA  | GLU | A | 383 | -8.643  | 2.609  | 39.553 | 1.00 | 20.93 | C   |
| ATOM | 3007 | C   | GLU | A | 383 | -8.048  | 3.427  | 38.400 | 1.00 | 17.88 | C   |
| ATOM | 3008 | O   | GLU | A | 383 | -7.189  | 4.253  | 38.640 | 1.00 | 18.41 | O   |
| ATOM | 3009 | CB  | GLU | A | 383 | -7.916  | 1.246  | 39.643 | 1.00 | 24.93 | C   |
| ATOM | 3010 | CG  | GLU | A | 383 | -6.405  | 1.261  | 39.272 | 1.00 | 22.82 | C   |
| ATOM | 3011 | CD  | GLU | A | 383 | -5.485  | 1.591  | 40.440 | 1.00 | 22.48 | C   |
| ATOM | 3012 | OE1 | GLU | A | 383 | -5.574  | 2.732  | 40.956 | 1.00 | 21.74 | O   |
| ATOM | 3013 | OE2 | GLU | A | 383 | -4.621  | 0.737  | 40.781 | 1.00 | 19.05 | O1- |
| ATOM | 3014 | N   | PRO | A | 384 | -8.487  | 3.215  | 37.153 | 1.00 | 14.01 | N   |
| ATOM | 3015 | CA  | PRO | A | 384 | -8.206  | 4.228  | 36.135 | 1.00 | 15.62 | C   |
| ATOM | 3016 | C   | PRO | A | 384 | -8.687  | 5.643  | 36.491 | 1.00 | 18.77 | C   |
| ATOM | 3017 | O   | PRO | A | 384 | -7.860  | 6.487  | 36.866 | 1.00 | 20.60 | O   |
| ATOM | 3018 | CB  | PRO | A | 384 | -8.890  | 3.683  | 34.890 | 1.00 | 14.10 | C   |
| ATOM | 3019 | CG  | PRO | A | 384 | -9.622  | 2.425  | 35.353 | 1.00 | 14.48 | C   |
| ATOM | 3020 | CD  | PRO | A | 384 | -8.870  | 1.952  | 36.529 | 1.00 | 13.10 | C   |
| ATOM | 3021 | N   | GLN | A | 385 | -10.005 | 5.890  | 36.426 | 1.00 | 19.75 | N   |
| ATOM | 3022 | CA  | GLN | A | 385 | -10.623 | 7.176  | 36.806 | 1.00 | 19.44 | C   |
| ATOM | 3023 | C   | GLN | A | 385 | -9.841  | 7.869  | 37.909 | 1.00 | 19.08 | C   |
| ATOM | 3024 | O   | GLN | A | 385 | -9.943  | 9.075  | 38.105 | 1.00 | 19.58 | O   |
| ATOM | 3025 | CB  | GLN | A | 385 | -12.068 | 6.967  | 37.300 | 1.00 | 18.93 | C   |
| ATOM | 3026 | CG  | GLN | A | 385 | -13.135 | 7.054  | 36.222 | 1.00 | 22.91 | C   |
| ATOM | 3027 | CD  | GLN | A | 385 | -14.452 | 7.633  | 36.729 | 1.00 | 27.37 | C   |
| ATOM | 3028 | NE2 | GLN | A | 385 | -14.359 | 8.627  | 37.618 | 1.00 | 29.27 | N   |
| ATOM | 3029 | OE1 | GLN | A | 385 | -15.538 | 7.269  | 36.248 | 1.00 | 23.96 | O   |
| ATOM | 3030 | N   | ASN | A | 386 | -9.198  | 7.062  | 38.735 | 1.00 | 19.76 | N   |
| ATOM | 3031 | CA  | ASN | A | 386 | -8.384  | 7.586  | 39.800 | 1.00 | 22.19 | C   |
| ATOM | 3032 | C   | ASN | A | 386 | -6.935  | 7.815  | 39.379 | 1.00 | 20.96 | C   |
| ATOM | 3033 | O   | ASN | A | 386 | -6.552  | 8.967  | 39.235 | 1.00 | 20.97 | O   |
| ATOM | 3034 | CB  | ASN | A | 386 | -8.524  | 6.695  | 41.050 | 1.00 | 23.37 | C   |
| ATOM | 3035 | CG  | ASN | A | 386 | -9.864  | 6.933  | 41.789 | 1.00 | 24.44 | C   |
| ATOM | 3036 | ND2 | ASN | A | 386 | -10.081 | 8.176  | 42.227 | 1.00 | 19.73 | N   |
| ATOM | 3037 | OD1 | ASN | A | 386 | -10.734 | 6.045  | 41.845 | 1.00 | 22.44 | O   |
| ATOM | 3038 | N   | LEU | A | 387 | -6.223  | 6.749  | 38.991 | 1.00 | 20.99 | N   |
| ATOM | 3039 | CA  | LEU | A | 387 | -4.777  | 6.761  | 38.639 | 1.00 | 19.03 | C   |
| ATOM | 3040 | C   | LEU | A | 387 | -4.344  | 7.967  | 37.800 | 1.00 | 19.94 | C   |
| ATOM | 3041 | O   | LEU | A | 387 | -3.326  | 8.605  | 38.088 | 1.00 | 15.85 | O   |
| ATOM | 3042 | CB  | LEU | A | 387 | -4.387  | 5.459  | 37.888 | 1.00 | 16.60 | C   |
| ATOM | 3043 | CG  | LEU | A | 387 | -2.952  | 5.202  | 37.368 | 1.00 | 14.35 | C   |
| ATOM | 3044 | CD1 | LEU | A | 387 | -2.328  | 3.996  | 38.035 | 1.00 | 8.49  | C   |
| ATOM | 3045 | CD2 | LEU | A | 387 | -2.974  | 4.987  | 35.868 | 1.00 | 12.25 | C   |
| ATOM | 3046 | N   | ILE | A | 388 | -5.183  | 8.336  | 36.838 | 1.00 | 21.75 | N   |
| ATOM | 3047 | CA  | ILE | A | 388 | -4.984  | 9.544  | 36.034 | 1.00 | 24.55 | C   |
| ATOM | 3048 | C   | ILE | A | 388 | -5.094  | 10.847 | 36.880 | 1.00 | 26.81 | C   |
| ATOM | 3049 | O   | ILE | A | 388 | -5.268  | 11.943 | 36.341 | 1.00 | 26.63 | O   |
| ATOM | 3050 | CB  | ILE | A | 388 | -6.000  | 9.592  | 34.822 | 1.00 | 22.71 | C   |
| ATOM | 3051 | CG1 | ILE | A | 388 | -6.237  | 8.196  | 34.243 | 1.00 | 18.19 | C   |
| ATOM | 3052 | CG2 | ILE | A | 388 | -5.417  | 10.407 | 33.692 | 1.00 | 22.80 | C   |
| ATOM | 3053 | CD1 | ILE | A | 388 | -4.998  | 7.574  | 33.621 | 1.00 | 16.41 | C   |
| ATOM | 3054 | N   | LYS | A | 389 | -5.028  | 10.699 | 38.205 | 1.00 | 29.41 | N   |
| ATOM | 3055 | CA  | LYS | A | 389 | -4.770  | 11.788 | 39.136 | 1.00 | 30.13 | C   |
| ATOM | 3056 | C   | LYS | A | 389 | -3.251  | 11.818 | 39.376 | 1.00 | 30.26 | C   |
| ATOM | 3057 | O   | LYS | A | 389 | -2.558  | 12.722 | 38.899 | 1.00 | 30.98 | O   |
| ATOM | 3058 | CB  | LYS | A | 389 | -5.517  | 11.556 | 40.468 | 1.00 | 33.95 | C   |
| ATOM | 3059 | CG  | LYS | A | 389 | -5.040  | 12.458 | 41.657 | 1.00 | 35.82 | C   |
| ATOM | 3060 | CD  | LYS | A | 389 | -5.674  | 12.085 | 43.010 | 1.00 | 34.70 | C   |
| ATOM | 3061 | CE  | LYS | A | 389 | -6.883  | 12.973 | 43.356 | 1.00 | 35.61 | C   |
| ATOM | 3062 | NZ  | LYS | A | 389 | -8.212  | 12.441 | 42.868 | 1.00 | 33.54 | N1+ |
| ATOM | 3063 | N   | GLN | A | 390 | -2.709  | 10.787 | 40.017 | 1.00 | 29.25 | N   |
| ATOM | 3064 | CA  | GLN | A | 390 | -1.259  | 10.707 | 40.162 | 1.00 | 28.68 | C   |
| ATOM | 3065 | C   | GLN | A | 390 | -0.642  | 10.117 | 38.874 | 1.00 | 27.03 | C   |
| ATOM | 3066 | O   | GLN | A | 390 | 0.333   | 9.360  | 38.911 | 1.00 | 26.91 | O   |
| ATOM | 3067 | CB  | GLN | A | 390 | -0.882  | 9.887  | 41.406 | 1.00 | 29.73 | C   |
| ATOM | 3068 | CG  | GLN | A | 390 | 0.416   | 10.334 | 42.107 | 1.00 | 28.58 | C   |
| ATOM | 3069 | CD  | GLN | A | 390 | 0.193   | 11.454 | 43.108 | 1.00 | 29.76 | C   |
| ATOM | 3070 | NE2 | GLN | A | 390 | -0.114  | 11.089 | 44.353 | 1.00 | 30.78 | N   |
| ATOM | 3071 | OE1 | GLN | A | 390 | 0.315   | 12.635 | 42.775 | 1.00 | 30.93 | O   |
| ATOM | 3072 | N   | ASN | A | 391 | -1.358  | 10.288 | 37.772 | 1.00 | 24.04 | N   |
| ATOM | 3073 | CA  | ASN | A | 391 | -0.718  | 10.582 | 36.515 | 1.00 | 22.15 | C   |
| ATOM | 3074 | C   | ASN | A | 391 | -0.857  | 12.091 | 36.495 | 1.00 | 18.92 | C   |
| ATOM | 3075 | O   | ASN | A | 391 | -0.065  | 12.773 | 37.132 | 1.00 | 18.87 | O   |
| ATOM | 3076 | CB  | ASN | A | 391 | -1.487  | 9.959  | 35.334 | 1.00 | 28.55 | C   |

|      |      |     |     |   |     |        |        |        |      |       |     |
|------|------|-----|-----|---|-----|--------|--------|--------|------|-------|-----|
| ATOM | 3077 | CG  | ASN | A | 391 | -0.680 | 8.877  | 34.571 | 1.00 | 33.87 | C   |
| ATOM | 3078 | ND2 | ASN | A | 391 | 0.535  | 8.555  | 35.050 | 1.00 | 36.03 | N   |
| ATOM | 3079 | OD1 | ASN | A | 391 | -1.189 | 8.289  | 33.605 | 1.00 | 33.57 | O   |
| ATOM | 3080 | N   | CYS | A | 392 | -2.048 | 12.556 | 36.135 | 1.00 | 16.20 | N   |
| ATOM | 3081 | CA  | CYS | A | 392 | -2.222 | 13.923 | 35.670 | 1.00 | 13.67 | C   |
| ATOM | 3082 | C   | CYS | A | 392 | -2.326 | 14.985 | 36.745 | 1.00 | 13.13 | C   |
| ATOM | 3083 | O   | CYS | A | 392 | -2.971 | 16.008 | 36.549 | 1.00 | 15.19 | O   |
| ATOM | 3084 | CB  | CYS | A | 392 | -3.420 | 14.004 | 34.730 | 1.00 | 11.64 | C   |
| ATOM | 3085 | SG  | CYS | A | 392 | -3.165 | 13.048 | 33.210 | 1.00 | 12.44 | S   |
| ATOM | 3086 | N   | GLU | A | 393 | -1.503 | 14.864 | 37.768 | 1.00 | 14.75 | N   |
| ATOM | 3087 | CA  | GLU | A | 393 | -1.268 | 16.000 | 38.653 | 1.00 | 19.49 | C   |
| ATOM | 3088 | C   | GLU | A | 393 | 0.227  | 16.228 | 38.975 | 1.00 | 20.11 | C   |
| ATOM | 3089 | O   | GLU | A | 393 | 0.754  | 17.335 | 38.787 | 1.00 | 18.94 | O   |
| ATOM | 3090 | CB  | GLU | A | 393 | -2.081 | 15.840 | 39.940 | 1.00 | 20.40 | C   |
| ATOM | 3091 | CG  | GLU | A | 393 | -2.403 | 17.152 | 40.613 | 1.00 | 20.82 | C   |
| ATOM | 3092 | CD  | GLU | A | 393 | -3.414 | 16.997 | 41.713 | 1.00 | 22.54 | C   |
| ATOM | 3093 | OE1 | GLU | A | 393 | -3.048 | 16.456 | 42.785 | 1.00 | 24.39 | O   |
| ATOM | 3094 | OE2 | GLU | A | 393 | -4.574 | 17.418 | 41.505 | 1.00 | 24.30 | O1- |
| ATOM | 3095 | N   | LEU | A | 394 | 0.908  | 15.165 | 39.396 | 1.00 | 19.67 | N   |
| ATOM | 3096 | CA  | LEU | A | 394 | 2.353  | 15.160 | 39.518 | 1.00 | 21.83 | C   |
| ATOM | 3097 | C   | LEU | A | 394 | 2.947  | 15.795 | 38.259 | 1.00 | 24.26 | C   |
| ATOM | 3098 | O   | LEU | A | 394 | 3.959  | 16.503 | 38.286 | 1.00 | 26.00 | O   |
| ATOM | 3099 | CB  | LEU | A | 394 | 2.839  | 13.722 | 39.646 | 1.00 | 21.88 | C   |
| ATOM | 3100 | CG  | LEU | A | 394 | 4.062  | 13.487 | 40.531 | 1.00 | 23.92 | C   |
| ATOM | 3101 | CD1 | LEU | A | 394 | 5.242  | 14.340 | 40.026 | 1.00 | 25.67 | C   |
| ATOM | 3102 | CD2 | LEU | A | 394 | 3.724  | 13.789 | 41.997 | 1.00 | 21.11 | C   |
| ATOM | 3103 | N   | PHE | A | 395 | 2.277  | 15.598 | 37.142 | 1.00 | 25.37 | N   |
| ATOM | 3104 | CA  | PHE | A | 395 | 2.708  | 16.304 | 35.965 | 1.00 | 25.77 | C   |
| ATOM | 3105 | C   | PHE | A | 395 | 2.196  | 17.746 | 35.907 | 1.00 | 26.16 | C   |
| ATOM | 3106 | O   | PHE | A | 395 | 2.988  | 18.663 | 36.144 | 1.00 | 26.53 | O   |
| ATOM | 3107 | CB  | PHE | A | 395 | 2.361  | 15.469 | 34.744 | 1.00 | 25.66 | C   |
| ATOM | 3108 | CG  | PHE | A | 395 | 3.224  | 14.254 | 34.625 | 1.00 | 26.69 | C   |
| ATOM | 3109 | CD1 | PHE | A | 395 | 4.603  | 14.367 | 34.780 | 1.00 | 26.93 | C   |
| ATOM | 3110 | CD2 | PHE | A | 395 | 2.676  | 13.000 | 34.460 | 1.00 | 26.92 | C   |
| ATOM | 3111 | CE1 | PHE | A | 395 | 5.417  | 13.264 | 34.773 | 1.00 | 25.90 | C   |
| ATOM | 3112 | CE2 | PHE | A | 395 | 3.487  | 11.886 | 34.451 | 1.00 | 29.35 | C   |
| ATOM | 3113 | CZ  | PHE | A | 395 | 4.867  | 12.022 | 34.609 | 1.00 | 28.67 | C   |
| ATOM | 3114 | N   | GLU | A | 396 | 0.868  | 17.902 | 35.930 | 1.00 | 24.62 | N   |
| ATOM | 3115 | CA  | GLU | A | 396 | 0.191  | 19.186 | 35.745 | 1.00 | 22.66 | C   |
| ATOM | 3116 | C   | GLU | A | 396 | 0.982  | 20.346 | 36.329 | 1.00 | 24.98 | C   |
| ATOM | 3117 | O   | GLU | A | 396 | 1.905  | 20.842 | 35.684 | 1.00 | 25.79 | O   |
| ATOM | 3118 | CB  | GLU | A | 396 | -1.209 | 19.129 | 36.363 | 1.00 | 21.41 | C   |
| ATOM | 3119 | CG  | GLU | A | 396 | -2.062 | 20.342 | 36.075 | 1.00 | 18.86 | C   |
| ATOM | 3120 | CD  | GLU | A | 396 | -3.511 | 20.135 | 36.448 | 1.00 | 19.66 | C   |
| ATOM | 3121 | OE1 | GLU | A | 396 | -4.119 | 19.159 | 35.965 | 1.00 | 21.53 | O   |
| ATOM | 3122 | OE2 | GLU | A | 396 | -4.056 | 20.951 | 37.210 | 1.00 | 16.14 | O1- |
| ATOM | 3123 | N   | GLN | A | 397 | 0.686  | 20.717 | 37.577 | 1.00 | 28.23 | N   |
| ATOM | 3124 | CA  | GLN | A | 397 | 1.460  | 21.738 | 38.288 | 1.00 | 27.32 | C   |
| ATOM | 3125 | C   | GLN | A | 397 | 2.530  | 20.945 | 38.997 | 1.00 | 25.36 | C   |
| ATOM | 3126 | O   | GLN | A | 397 | 2.351  | 20.612 | 40.158 | 1.00 | 22.92 | O   |
| ATOM | 3127 | CB  | GLN | A | 397 | 0.595  | 22.527 | 39.326 | 1.00 | 28.36 | C   |
| ATOM | 3128 | CG  | GLN | A | 397 | 1.354  | 23.682 | 40.097 | 1.00 | 26.26 | C   |
| ATOM | 3129 | CD  | GLN | A | 397 | 0.487  | 24.528 | 41.064 | 1.00 | 25.26 | C   |
| ATOM | 3130 | NE2 | GLN | A | 397 | -0.812 | 24.290 | 41.070 | 1.00 | 27.07 | N   |
| ATOM | 3131 | OE1 | GLN | A | 397 | 1.011  | 25.332 | 41.847 | 1.00 | 24.51 | O   |
| ATOM | 3132 | N   | LEU | A | 398 | 3.461  | 20.405 | 38.210 | 1.00 | 25.94 | N   |
| ATOM | 3133 | CA  | LEU | A | 398 | 4.677  | 19.792 | 38.751 | 1.00 | 26.57 | C   |
| ATOM | 3134 | C   | LEU | A | 398 | 5.577  | 19.106 | 37.699 | 1.00 | 24.32 | C   |
| ATOM | 3135 | O   | LEU | A | 398 | 6.460  | 18.340 | 38.071 | 1.00 | 22.18 | O   |
| ATOM | 3136 | CB  | LEU | A | 398 | 4.328  | 18.793 | 39.899 | 1.00 | 29.28 | C   |
| ATOM | 3137 | CG  | LEU | A | 398 | 4.839  | 18.900 | 41.365 | 1.00 | 29.60 | C   |
| ATOM | 3138 | CD1 | LEU | A | 398 | 4.218  | 20.072 | 42.135 | 1.00 | 29.70 | C   |
| ATOM | 3139 | CD2 | LEU | A | 398 | 4.513  | 17.604 | 42.113 | 1.00 | 27.39 | C   |
| ATOM | 3140 | N   | GLY | A | 399 | 5.407  | 19.409 | 36.409 | 1.00 | 24.36 | N   |
| ATOM | 3141 | CA  | GLY | A | 399 | 6.447  | 19.039 | 35.442 | 1.00 | 26.34 | C   |
| ATOM | 3142 | C   | GLY | A | 399 | 6.243  | 18.217 | 34.146 | 1.00 | 25.35 | C   |
| ATOM | 3143 | O   | GLY | A | 399 | 6.431  | 16.983 | 34.105 | 1.00 | 24.71 | O   |
| ATOM | 3144 | N   | GLU | A | 400 | 6.272  | 18.954 | 33.041 | 1.00 | 23.31 | N   |
| ATOM | 3145 | CA  | GLU | A | 400 | 6.309  | 18.381 | 31.700 | 1.00 | 21.85 | C   |
| ATOM | 3146 | C   | GLU | A | 400 | 7.499  | 17.394 | 31.494 | 1.00 | 21.88 | C   |
| ATOM | 3147 | O   | GLU | A | 400 | 7.351  | 16.186 | 31.628 | 1.00 | 20.25 | O   |

|      |      |     |     |   |     |        |        |        |      |       |     |
|------|------|-----|-----|---|-----|--------|--------|--------|------|-------|-----|
| ATOM | 3148 | CB  | GLU | A | 400 | 6.389  | 19.544 | 30.704 | 1.00 | 18.99 | C   |
| ATOM | 3149 | CG  | GLU | A | 400 | 5.051  | 20.164 | 30.301 | 1.00 | 18.80 | C   |
| ATOM | 3150 | CD  | GLU | A | 400 | 4.368  | 21.016 | 31.372 | 1.00 | 15.88 | C   |
| ATOM | 3151 | OE1 | GLU | A | 400 | 4.576  | 20.786 | 32.574 | 1.00 | 13.73 | O   |
| ATOM | 3152 | OE2 | GLU | A | 400 | 3.524  | 21.862 | 30.999 | 1.00 | 14.44 | O1- |
| ATOM | 3153 | N   | TYR | A | 401 | 8.701  | 17.951 | 31.356 | 1.00 | 22.47 | N   |
| ATOM | 3154 | CA  | TYR | A | 401 | 9.926  | 17.216 | 31.020 | 1.00 | 20.38 | C   |
| ATOM | 3155 | C   | TYR | A | 401 | 10.935 | 17.239 | 32.181 | 1.00 | 19.52 | C   |
| ATOM | 3156 | O   | TYR | A | 401 | 12.064 | 16.790 | 32.033 | 1.00 | 18.53 | O   |
| ATOM | 3157 | CB  | TYR | A | 401 | 10.554 | 17.881 | 29.797 | 1.00 | 23.78 | C   |
| ATOM | 3158 | CG  | TYR | A | 401 | 11.448 | 16.997 | 28.969 | 1.00 | 25.15 | C   |
| ATOM | 3159 | CD1 | TYR | A | 401 | 12.748 | 16.752 | 29.363 | 1.00 | 25.90 | C   |
| ATOM | 3160 | CD2 | TYR | A | 401 | 11.060 | 16.579 | 27.706 | 1.00 | 25.00 | C   |
| ATOM | 3161 | CE1 | TYR | A | 401 | 13.641 | 16.158 | 28.525 | 1.00 | 27.01 | C   |
| ATOM | 3162 | CE2 | TYR | A | 401 | 11.948 | 15.979 | 26.863 | 1.00 | 26.20 | C   |
| ATOM | 3163 | CZ  | TYR | A | 401 | 13.250 | 15.790 | 27.270 | 1.00 | 26.58 | C   |
| ATOM | 3164 | OH  | TYR | A | 401 | 14.209 | 15.388 | 26.375 | 1.00 | 22.64 | O   |
| ATOM | 3165 | N   | LYS | A | 402 | 10.621 | 18.021 | 33.211 | 1.00 | 22.60 | N   |
| ATOM | 3166 | CA  | LYS | A | 402 | 11.307 | 17.936 | 34.503 | 1.00 | 22.71 | C   |
| ATOM | 3167 | C   | LYS | A | 402 | 10.981 | 16.574 | 35.103 | 1.00 | 24.22 | C   |
| ATOM | 3168 | O   | LYS | A | 402 | 11.543 | 15.565 | 34.676 | 1.00 | 25.37 | O   |
| ATOM | 3169 | CB  | LYS | A | 402 | 10.845 | 19.067 | 35.435 | 1.00 | 20.39 | C   |
| ATOM | 3170 | CG  | LYS | A | 402 | 11.323 | 18.957 | 36.876 | 1.00 | 17.50 | C   |
| ATOM | 3171 | CD  | LYS | A | 402 | 12.633 | 19.686 | 37.105 | 1.00 | 17.85 | C   |
| ATOM | 3172 | CE  | LYS | A | 402 | 13.838 | 18.750 | 37.135 | 1.00 | 17.83 | C   |
| ATOM | 3173 | NZ  | LYS | A | 402 | 15.068 | 19.486 | 37.556 | 1.00 | 19.64 | N1+ |
| ATOM | 3174 | N   | PHE | A | 403 | 9.954  | 16.495 | 35.941 | 1.00 | 25.18 | N   |
| ATOM | 3175 | CA  | PHE | A | 403 | 9.679  | 15.217 | 36.562 | 1.00 | 28.48 | C   |
| ATOM | 3176 | C   | PHE | A | 403 | 8.640  | 14.362 | 35.850 | 1.00 | 30.15 | C   |
| ATOM | 3177 | O   | PHE | A | 403 | 7.621  | 13.986 | 36.423 | 1.00 | 30.31 | O   |
| ATOM | 3178 | CB  | PHE | A | 403 | 9.370  | 15.398 | 38.045 | 1.00 | 28.85 | C   |
| ATOM | 3179 | CG  | PHE | A | 403 | 10.610 | 15.601 | 38.886 | 1.00 | 30.05 | C   |
| ATOM | 3180 | CD1 | PHE | A | 403 | 11.155 | 16.860 | 39.037 | 1.00 | 28.78 | C   |
| ATOM | 3181 | CD2 | PHE | A | 403 | 11.326 | 14.511 | 39.371 | 1.00 | 29.76 | C   |
| ATOM | 3182 | CE1 | PHE | A | 403 | 12.393 | 17.026 | 39.632 | 1.00 | 28.52 | C   |
| ATOM | 3183 | CE2 | PHE | A | 403 | 12.561 | 14.677 | 39.967 | 1.00 | 26.34 | C   |
| ATOM | 3184 | CZ  | PHE | A | 403 | 13.097 | 15.928 | 40.092 | 1.00 | 26.88 | C   |
| ATOM | 3185 | N   | GLN | A | 404 | 8.911  | 14.106 | 34.565 | 1.00 | 32.37 | N   |
| ATOM | 3186 | CA  | GLN | A | 404 | 8.532  | 12.852 | 33.887 | 1.00 | 30.49 | C   |
| ATOM | 3187 | C   | GLN | A | 404 | 9.506  | 11.781 | 34.350 | 1.00 | 29.27 | C   |
| ATOM | 3188 | O   | GLN | A | 404 | 9.194  | 10.601 | 34.304 | 1.00 | 29.71 | O   |
| ATOM | 3189 | CB  | GLN | A | 404 | 8.648  | 12.975 | 32.361 | 1.00 | 31.75 | C   |
| ATOM | 3190 | CG  | GLN | A | 404 | 10.038 | 12.639 | 31.796 | 1.00 | 30.57 | C   |
| ATOM | 3191 | CD  | GLN | A | 404 | 10.134 | 12.873 | 30.298 | 1.00 | 31.42 | C   |
| ATOM | 3192 | NE2 | GLN | A | 404 | 9.715  | 11.891 | 29.507 | 1.00 | 30.06 | N   |
| ATOM | 3193 | OE1 | GLN | A | 404 | 10.548 | 13.942 | 29.858 | 1.00 | 31.82 | O   |
| ATOM | 3194 | N   | ASN | A | 405 | 10.695 | 12.196 | 34.786 | 1.00 | 27.19 | N   |
| ATOM | 3195 | CA  | ASN | A | 405 | 11.561 | 11.290 | 35.527 | 1.00 | 24.01 | C   |
| ATOM | 3196 | C   | ASN | A | 405 | 11.159 | 11.181 | 37.030 | 1.00 | 21.70 | C   |
| ATOM | 3197 | O   | ASN | A | 405 | 11.983 | 11.211 | 37.946 | 1.00 | 15.16 | O   |
| ATOM | 3198 | CB  | ASN | A | 405 | 13.033 | 11.663 | 35.278 | 1.00 | 22.91 | C   |
| ATOM | 3199 | CG  | ASN | A | 405 | 13.611 | 12.577 | 36.314 | 1.00 | 19.47 | C   |
| ATOM | 3200 | ND2 | ASN | A | 405 | 13.058 | 13.770 | 36.427 | 1.00 | 19.73 | N   |
| ATOM | 3201 | OD1 | ASN | A | 405 | 14.666 | 12.283 | 36.866 | 1.00 | 17.07 | O   |
| ATOM | 3202 | N   | ALA | A | 406 | 9.852  | 10.999 | 37.231 | 1.00 | 19.67 | N   |
| ATOM | 3203 | CA  | ALA | A | 406 | 9.294  | 10.467 | 38.458 | 1.00 | 18.79 | C   |
| ATOM | 3204 | C   | ALA | A | 406 | 8.941  | 9.011  | 38.194 | 1.00 | 20.96 | C   |
| ATOM | 3205 | O   | ALA | A | 406 | 9.168  | 8.141  | 39.044 | 1.00 | 23.15 | O   |
| ATOM | 3206 | CB  | ALA | A | 406 | 8.048  | 11.228 | 38.841 | 1.00 | 15.73 | C   |
| ATOM | 3207 | N   | LEU | A | 407 | 8.393  | 8.731  | 37.013 | 1.00 | 19.76 | N   |
| ATOM | 3208 | CA  | LEU | A | 407 | 7.955  | 7.379  | 36.692 | 1.00 | 16.89 | C   |
| ATOM | 3209 | C   | LEU | A | 407 | 9.136  | 6.433  | 36.519 | 1.00 | 17.14 | C   |
| ATOM | 3210 | O   | LEU | A | 407 | 8.978  | 5.221  | 36.655 | 1.00 | 15.99 | O   |
| ATOM | 3211 | CB  | LEU | A | 407 | 7.086  | 7.393  | 35.444 | 1.00 | 16.01 | C   |
| ATOM | 3212 | CG  | LEU | A | 407 | 5.659  | 7.835  | 35.763 | 1.00 | 18.48 | C   |
| ATOM | 3213 | CD1 | LEU | A | 407 | 4.978  | 8.430  | 34.540 | 1.00 | 20.67 | C   |
| ATOM | 3214 | CD2 | LEU | A | 407 | 4.871  | 6.641  | 36.285 | 1.00 | 20.49 | C   |
| ATOM | 3215 | N   | LEU | A | 408 | 10.317 | 6.998  | 36.250 | 1.00 | 18.02 | N   |
| ATOM | 3216 | CA  | LEU | A | 408 | 11.617 | 6.307  | 36.411 | 1.00 | 18.24 | C   |
| ATOM | 3217 | C   | LEU | A | 408 | 11.824 | 5.869  | 37.872 | 1.00 | 18.70 | C   |
| ATOM | 3218 | O   | LEU | A | 408 | 11.811 | 4.687  | 38.190 | 1.00 | 17.33 | O   |

|      |      |     |     |   |     |        |        |        |      |       |     |
|------|------|-----|-----|---|-----|--------|--------|--------|------|-------|-----|
| ATOM | 3219 | CB  | LEU | A | 408 | 12.767 | 7.250  | 36.018 | 1.00 | 18.19 | C   |
| ATOM | 3220 | CG  | LEU | A | 408 | 13.659 | 7.027  | 34.797 | 1.00 | 16.19 | C   |
| ATOM | 3221 | CD1 | LEU | A | 408 | 14.511 | 8.259  | 34.575 | 1.00 | 11.96 | C   |
| ATOM | 3222 | CD2 | LEU | A | 408 | 14.539 | 5.807  | 34.995 | 1.00 | 16.05 | C   |
| ATOM | 3223 | N   | VAL | A | 409 | 11.989 | 6.846  | 38.759 | 1.00 | 20.54 | N   |
| ATOM | 3224 | CA  | VAL | A | 409 | 12.091 | 6.603  | 40.193 | 1.00 | 20.69 | C   |
| ATOM | 3225 | C   | VAL | A | 409 | 11.118 | 5.538  | 40.642 | 1.00 | 21.47 | C   |
| ATOM | 3226 | O   | VAL | A | 409 | 11.487 | 4.672  | 41.418 | 1.00 | 23.58 | O   |
| ATOM | 3227 | CB  | VAL | A | 409 | 11.797 | 7.867  | 41.012 | 1.00 | 19.59 | C   |
| ATOM | 3228 | CG1 | VAL | A | 409 | 11.897 | 7.549  | 42.518 | 1.00 | 19.23 | C   |
| ATOM | 3229 | CG2 | VAL | A | 409 | 12.753 | 8.975  | 40.613 | 1.00 | 17.46 | C   |
| ATOM | 3230 | N   | ARG | A | 410 | 9.879  | 5.610  | 40.163 | 1.00 | 21.93 | N   |
| ATOM | 3231 | CA  | ARG | A | 410 | 8.889  | 4.593  | 40.488 | 1.00 | 21.95 | C   |
| ATOM | 3232 | C   | ARG | A | 410 | 9.369  | 3.263  | 39.930 | 1.00 | 21.48 | C   |
| ATOM | 3233 | O   | ARG | A | 410 | 9.723  | 2.363  | 40.692 | 1.00 | 24.94 | O   |
| ATOM | 3234 | CB  | ARG | A | 410 | 7.506  | 4.939  | 39.904 | 1.00 | 22.67 | C   |
| ATOM | 3235 | CG  | ARG | A | 410 | 6.846  | 6.205  | 40.445 | 1.00 | 20.28 | C   |
| ATOM | 3236 | CD  | ARG | A | 410 | 5.357  | 6.220  | 40.114 | 1.00 | 20.80 | C   |
| ATOM | 3237 | NE  | ARG | A | 410 | 4.733  | 7.522  | 40.365 | 1.00 | 20.80 | N   |
| ATOM | 3238 | CZ  | ARG | A | 410 | 3.487  | 7.841  | 40.011 | 1.00 | 20.59 | C   |
| ATOM | 3239 | NH1 | ARG | A | 410 | 2.705  | 6.941  | 39.426 | 1.00 | 21.04 | N1+ |
| ATOM | 3240 | NH2 | ARG | A | 410 | 3.025  | 9.067  | 40.234 | 1.00 | 20.07 | N   |
| ATOM | 3241 | N   | TYR | A | 411 | 9.529  | 3.186  | 38.615 | 1.00 | 18.76 | N   |
| ATOM | 3242 | CA  | TYR | A | 411 | 9.792  | 1.907  | 37.974 | 1.00 | 17.50 | C   |
| ATOM | 3243 | C   | TYR | A | 411 | 11.169 | 1.356  | 38.330 | 1.00 | 17.38 | C   |
| ATOM | 3244 | O   | TYR | A | 411 | 11.289 | 0.240  | 38.823 | 1.00 | 15.90 | O   |
| ATOM | 3245 | CB  | TYR | A | 411 | 9.606  | 2.024  | 36.453 | 1.00 | 18.41 | C   |
| ATOM | 3246 | CG  | TYR | A | 411 | 8.151  | 1.974  | 36.064 | 1.00 | 17.19 | C   |
| ATOM | 3247 | CD1 | TYR | A | 411 | 7.215  | 2.657  | 36.815 | 1.00 | 15.09 | C   |
| ATOM | 3248 | CD2 | TYR | A | 411 | 7.684  | 1.060  | 35.137 | 1.00 | 18.38 | C   |
| ATOM | 3249 | CE1 | TYR | A | 411 | 5.885  | 2.431  | 36.681 | 1.00 | 11.66 | C   |
| ATOM | 3250 | CE2 | TYR | A | 411 | 6.325  | 0.829  | 34.998 | 1.00 | 15.51 | C   |
| ATOM | 3251 | CZ  | TYR | A | 411 | 5.436  | 1.536  | 35.776 | 1.00 | 12.43 | C   |
| ATOM | 3252 | OH  | TYR | A | 411 | 4.079  | 1.476  | 35.573 | 1.00 | 16.59 | O   |
| ATOM | 3253 | N   | THR | A | 412 | 12.186 | 2.195  | 38.234 | 1.00 | 19.91 | N   |
| ATOM | 3254 | CA  | THR | A | 412 | 13.541 | 1.791  | 38.601 | 1.00 | 24.09 | C   |
| ATOM | 3255 | C   | THR | A | 412 | 13.591 | 1.176  | 39.988 | 1.00 | 23.32 | C   |
| ATOM | 3256 | O   | THR | A | 412 | 14.583 | 0.526  | 40.342 | 1.00 | 22.82 | O   |
| ATOM | 3257 | CB  | THR | A | 412 | 14.510 | 2.978  | 38.590 | 1.00 | 26.90 | C   |
| ATOM | 3258 | CG2 | THR | A | 412 | 15.900 | 2.514  | 38.214 | 1.00 | 29.28 | C   |
| ATOM | 3259 | OG1 | THR | A | 412 | 14.063 | 3.952  | 37.634 | 1.00 | 31.00 | O   |
| ATOM | 3260 | N   | LYS | A | 413 | 12.580 | 1.492  | 40.802 | 1.00 | 21.28 | N   |
| ATOM | 3261 | CA  | LYS | A | 413 | 12.512 | 1.006  | 42.170 | 1.00 | 19.27 | C   |
| ATOM | 3262 | C   | LYS | A | 413 | 11.796 | -0.322 | 42.158 | 1.00 | 19.80 | C   |
| ATOM | 3263 | O   | LYS | A | 413 | 12.418 | -1.382 | 42.340 | 1.00 | 20.91 | O   |
| ATOM | 3264 | CB  | LYS | A | 413 | 11.768 | 1.999  | 43.068 | 1.00 | 16.46 | C   |
| ATOM | 3265 | CG  | LYS | A | 413 | 12.670 | 2.713  | 44.084 | 1.00 | 17.32 | C   |
| ATOM | 3266 | CD  | LYS | A | 413 | 11.899 | 3.127  | 45.323 | 1.00 | 18.80 | C   |
| ATOM | 3267 | CE  | LYS | A | 413 | 11.409 | 4.570  | 45.242 | 1.00 | 21.30 | C   |
| ATOM | 3268 | NZ  | LYS | A | 413 | 12.515 | 5.551  | 45.015 | 1.00 | 20.06 | N1+ |
| ATOM | 3269 | N   | LYS | A | 414 | 10.531 | -0.282 | 41.752 | 1.00 | 18.33 | N   |
| ATOM | 3270 | CA  | LYS | A | 414 | 9.678  | -1.445 | 41.909 | 1.00 | 16.94 | C   |
| ATOM | 3271 | C   | LYS | A | 414 | 10.083 | -2.597 | 41.015 | 1.00 | 17.20 | C   |
| ATOM | 3272 | O   | LYS | A | 414 | 9.744  | -3.742 | 41.285 | 1.00 | 17.03 | O   |
| ATOM | 3273 | CB  | LYS | A | 414 | 8.192  | -1.098 | 41.704 | 1.00 | 17.27 | C   |
| ATOM | 3274 | CG  | LYS | A | 414 | 7.823  | -0.088 | 40.645 | 1.00 | 12.68 | C   |
| ATOM | 3275 | CD  | LYS | A | 414 | 6.341  | -0.276 | 40.311 | 1.00 | 14.55 | C   |
| ATOM | 3276 | CE  | LYS | A | 414 | 5.798  | 0.739  | 39.303 | 1.00 | 14.56 | C   |
| ATOM | 3277 | NZ  | LYS | A | 414 | 5.337  | 2.037  | 39.917 | 1.00 | 14.02 | N1+ |
| ATOM | 3278 | N   | VAL | A | 415 | 10.934 | -2.302 | 40.043 | 1.00 | 17.01 | N   |
| ATOM | 3279 | CA  | VAL | A | 415 | 11.369 | -3.287 | 39.070 | 1.00 | 16.75 | C   |
| ATOM | 3280 | C   | VAL | A | 415 | 12.780 | -2.914 | 38.581 | 1.00 | 21.86 | C   |
| ATOM | 3281 | O   | VAL | A | 415 | 12.949 | -2.362 | 37.490 | 1.00 | 23.99 | O   |
| ATOM | 3282 | CB  | VAL | A | 415 | 10.373 | -3.353 | 37.897 | 1.00 | 12.19 | C   |
| ATOM | 3283 | CG1 | VAL | A | 415 | 10.301 | -2.032 | 37.199 | 1.00 | 10.88 | C   |
| ATOM | 3284 | CG2 | VAL | A | 415 | 10.754 | -4.432 | 36.947 | 1.00 | 9.96  | C   |
| ATOM | 3285 | N   | PRO | A | 416 | 13.817 | -3.194 | 39.401 | 1.00 | 23.73 | N   |
| ATOM | 3286 | CA  | PRO | A | 416 | 15.121 | -2.556 | 39.239 | 1.00 | 23.14 | C   |
| ATOM | 3287 | C   | PRO | A | 416 | 16.129 | -3.485 | 38.583 | 1.00 | 22.45 | C   |
| ATOM | 3288 | O   | PRO | A | 416 | 17.310 | -3.467 | 38.920 | 1.00 | 20.59 | O   |
| ATOM | 3289 | CB  | PRO | A | 416 | 15.513 | -2.221 | 40.679 | 1.00 | 26.64 | C   |

|      |      |     |     |   |     |        |        |        |      |       |     |
|------|------|-----|-----|---|-----|--------|--------|--------|------|-------|-----|
| ATOM | 3290 | CG  | PRO | A | 416 | 14.755 | -3.262 | 41.552 | 1.00 | 24.34 | C   |
| ATOM | 3291 | CD  | PRO | A | 416 | 13.777 | -3.984 | 40.645 | 1.00 | 25.02 | C   |
| ATOM | 3292 | N   | GLN | A | 417 | 15.653 | -4.338 | 37.686 | 1.00 | 24.78 | N   |
| ATOM | 3293 | CA  | GLN | A | 417 | 16.554 | -5.178 | 36.894 | 1.00 | 25.39 | C   |
| ATOM | 3294 | C   | GLN | A | 417 | 16.386 | -5.115 | 35.367 | 1.00 | 25.68 | C   |
| ATOM | 3295 | O   | GLN | A | 417 | 17.256 | -5.608 | 34.646 | 1.00 | 28.59 | O   |
| ATOM | 3296 | CB  | GLN | A | 417 | 16.476 | -6.640 | 37.343 | 1.00 | 22.92 | C   |
| ATOM | 3297 | CG  | GLN | A | 417 | 17.445 | -6.998 | 38.437 | 1.00 | 16.76 | C   |
| ATOM | 3298 | CD  | GLN | A | 417 | 16.729 | -7.293 | 39.727 | 1.00 | 19.80 | C   |
| ATOM | 3299 | NE2 | GLN | A | 417 | 17.337 | -8.118 | 40.561 | 1.00 | 17.72 | N   |
| ATOM | 3300 | OE1 | GLN | A | 417 | 15.618 | -6.796 | 39.965 | 1.00 | 20.09 | O   |
| ATOM | 3301 | N   | VAL | A | 418 | 15.284 | -4.562 | 34.862 | 1.00 | 23.83 | N   |
| ATOM | 3302 | CA  | VAL | A | 418 | 15.206 | -4.262 | 33.420 | 1.00 | 25.79 | C   |
| ATOM | 3303 | C   | VAL | A | 418 | 16.443 | -3.398 | 33.023 | 1.00 | 25.27 | C   |
| ATOM | 3304 | O   | VAL | A | 418 | 17.075 | -2.784 | 33.886 | 1.00 | 26.72 | O   |
| ATOM | 3305 | CB  | VAL | A | 418 | 13.872 | -3.506 | 33.057 | 1.00 | 24.98 | C   |
| ATOM | 3306 | CG1 | VAL | A | 418 | 13.516 | -3.697 | 31.597 | 1.00 | 21.82 | C   |
| ATOM | 3307 | CG2 | VAL | A | 418 | 12.720 | -4.010 | 33.907 | 1.00 | 25.57 | C   |
| ATOM | 3308 | N   | SER | A | 419 | 16.865 | -3.451 | 31.761 | 1.00 | 23.89 | N   |
| ATOM | 3309 | CA  | SER | A | 419 | 18.115 | -2.791 | 31.338 | 1.00 | 24.81 | C   |
| ATOM | 3310 | C   | SER | A | 419 | 18.045 | -1.274 | 31.448 | 1.00 | 23.00 | C   |
| ATOM | 3311 | O   | SER | A | 419 | 17.072 | -0.685 | 31.022 | 1.00 | 23.69 | O   |
| ATOM | 3312 | CB  | SER | A | 419 | 18.449 | -3.159 | 29.888 | 1.00 | 25.20 | C   |
| ATOM | 3313 | OG  | SER | A | 419 | 18.798 | -4.528 | 29.762 | 1.00 | 28.67 | O   |
| ATOM | 3314 | N   | THR | A | 420 | 19.130 | -0.623 | 31.854 | 1.00 | 24.58 | N   |
| ATOM | 3315 | CA  | THR | A | 420 | 19.075 | 0.829  | 32.039 | 1.00 | 24.29 | C   |
| ATOM | 3316 | C   | THR | A | 420 | 18.501 | 1.555  | 30.855 | 1.00 | 24.81 | C   |
| ATOM | 3317 | O   | THR | A | 420 | 17.600 | 2.367  | 31.013 | 1.00 | 26.08 | O   |
| ATOM | 3318 | CB  | THR | A | 420 | 20.425 | 1.453  | 32.348 | 1.00 | 21.78 | C   |
| ATOM | 3319 | CG2 | THR | A | 420 | 20.375 | 2.953  | 32.130 | 1.00 | 21.26 | C   |
| ATOM | 3320 | OG1 | THR | A | 420 | 20.763 | 1.193  | 33.715 | 1.00 | 24.19 | O   |
| ATOM | 3321 | N   | PRO | A | 421 | 18.946 | 1.222  | 29.642 | 1.00 | 25.02 | N   |
| ATOM | 3322 | CA  | PRO | A | 421 | 18.193 | 1.830  | 28.545 | 1.00 | 26.98 | C   |
| ATOM | 3323 | C   | PRO | A | 421 | 16.704 | 1.458  | 28.629 | 1.00 | 27.18 | C   |
| ATOM | 3324 | O   | PRO | A | 421 | 15.850 | 2.349  | 28.768 | 1.00 | 25.10 | O   |
| ATOM | 3325 | CB  | PRO | A | 421 | 18.867 | 1.272  | 27.282 | 1.00 | 27.79 | C   |
| ATOM | 3326 | CG  | PRO | A | 421 | 19.758 | 0.135  | 27.777 | 1.00 | 29.44 | C   |
| ATOM | 3327 | CD  | PRO | A | 421 | 20.152 | 0.531  | 29.167 | 1.00 | 25.03 | C   |
| ATOM | 3328 | N   | THR | A | 422 | 16.427 | 0.149  | 28.728 | 1.00 | 26.36 | N   |
| ATOM | 3329 | CA  | THR | A | 422 | 15.064 | -0.393 | 28.605 | 1.00 | 24.58 | C   |
| ATOM | 3330 | C   | THR | A | 422 | 14.162 | 0.069  | 29.744 | 1.00 | 24.87 | C   |
| ATOM | 3331 | O   | THR | A | 422 | 13.011 | -0.349 | 29.839 | 1.00 | 27.96 | O   |
| ATOM | 3332 | CB  | THR | A | 422 | 15.058 | -1.947 | 28.560 | 1.00 | 21.16 | C   |
| ATOM | 3333 | CG2 | THR | A | 422 | 13.682 | -2.465 | 28.189 | 1.00 | 21.32 | C   |
| ATOM | 3334 | OG1 | THR | A | 422 | 15.985 | -2.411 | 27.570 | 1.00 | 20.86 | O   |
| ATOM | 3335 | N   | LEU | A | 423 | 14.745 | 0.778  | 30.703 | 1.00 | 25.19 | N   |
| ATOM | 3336 | CA  | LEU | A | 423 | 13.976 | 1.651  | 31.558 | 1.00 | 22.20 | C   |
| ATOM | 3337 | C   | LEU | A | 423 | 13.860 | 2.946  | 30.755 | 1.00 | 22.66 | C   |
| ATOM | 3338 | O   | LEU | A | 423 | 12.860 | 3.113  | 30.062 | 1.00 | 22.77 | O   |
| ATOM | 3339 | CB  | LEU | A | 423 | 14.689 | 1.889  | 32.891 | 1.00 | 23.24 | C   |
| ATOM | 3340 | CG  | LEU | A | 423 | 14.626 | 0.885  | 34.065 | 1.00 | 22.20 | C   |
| ATOM | 3341 | CD1 | LEU | A | 423 | 13.289 | 0.159  | 34.098 | 1.00 | 19.45 | C   |
| ATOM | 3342 | CD2 | LEU | A | 423 | 15.788 | -0.093 | 33.971 | 1.00 | 18.12 | C   |
| ATOM | 3343 | N   | VAL | A | 424 | 14.969 | 3.678  | 30.592 | 1.00 | 22.40 | N   |
| ATOM | 3344 | CA  | VAL | A | 424 | 14.941 | 5.007  | 29.944 | 1.00 | 19.48 | C   |
| ATOM | 3345 | C   | VAL | A | 424 | 14.315 | 5.097  | 28.554 | 1.00 | 21.48 | C   |
| ATOM | 3346 | O   | VAL | A | 424 | 14.119 | 6.211  | 28.067 | 1.00 | 23.47 | O   |
| ATOM | 3347 | CB  | VAL | A | 424 | 16.337 | 5.707  | 29.809 | 1.00 | 17.06 | C   |
| ATOM | 3348 | CG1 | VAL | A | 424 | 16.141 | 7.204  | 29.867 | 1.00 | 9.48  | C   |
| ATOM | 3349 | CG2 | VAL | A | 424 | 17.336 | 5.264  | 30.890 | 1.00 | 14.26 | C   |
| ATOM | 3350 | N   | GLU | A | 425 | 13.977 | 3.977  | 27.908 | 1.00 | 20.71 | N   |
| ATOM | 3351 | CA  | GLU | A | 425 | 13.114 | 4.076  | 26.724 | 1.00 | 20.21 | C   |
| ATOM | 3352 | C   | GLU | A | 425 | 11.679 | 4.209  | 27.187 | 1.00 | 21.09 | C   |
| ATOM | 3353 | O   | GLU | A | 425 | 10.983 | 5.151  | 26.790 | 1.00 | 22.27 | O   |
| ATOM | 3354 | CB  | GLU | A | 425 | 13.231 | 2.868  | 25.790 | 1.00 | 19.48 | C   |
| ATOM | 3355 | CG  | GLU | A | 425 | 13.577 | 3.210  | 24.334 | 1.00 | 17.47 | C   |
| ATOM | 3356 | CD  | GLU | A | 425 | 12.582 | 4.152  | 23.653 | 1.00 | 17.36 | C   |
| ATOM | 3357 | OE1 | GLU | A | 425 | 12.703 | 5.386  | 23.801 | 1.00 | 16.77 | O   |
| ATOM | 3358 | OE2 | GLU | A | 425 | 11.746 | 3.674  | 22.860 | 1.00 | 20.99 | O1- |
| ATOM | 3359 | N   | VAL | A | 426 | 11.277 | 3.332  | 28.108 | 1.00 | 20.45 | N   |
| ATOM | 3360 | CA  | VAL | A | 426 | 9.940  | 3.379  | 28.710 | 1.00 | 18.52 | C   |



|      |      |     |     |   |     |        |        |        |      |       |     |
|------|------|-----|-----|---|-----|--------|--------|--------|------|-------|-----|
| ATOM | 3361 | C   | VAL | A | 426 | 9.831  | 4.594  | 29.631 | 1.00 | 17.11 | C   |
| ATOM | 3362 | O   | VAL | A | 426 | 9.014  | 5.466  | 29.407 | 1.00 | 19.30 | O   |
| ATOM | 3363 | CB  | VAL | A | 426 | 9.662  | 2.131  | 29.556 | 1.00 | 17.57 | C   |
| ATOM | 3364 | CG1 | VAL | A | 426 | 8.194  | 1.980  | 29.795 | 1.00 | 17.28 | C   |
| ATOM | 3365 | CG2 | VAL | A | 426 | 10.227 | 0.911  | 28.878 | 1.00 | 20.59 | C   |
| ATOM | 3366 | N   | SER | A | 427 | 10.693 | 4.664  | 30.635 | 1.00 | 14.13 | N   |
| ATOM | 3367 | CA  | SER | A | 427 | 10.598 | 5.670  | 31.676 | 1.00 | 14.17 | C   |
| ATOM | 3368 | C   | SER | A | 427 | 10.109 | 7.012  | 31.164 | 1.00 | 13.54 | C   |
| ATOM | 3369 | O   | SER | A | 427 | 9.024  | 7.432  | 31.522 | 1.00 | 11.17 | O   |
| ATOM | 3370 | CB  | SER | A | 427 | 11.950 | 5.834  | 32.356 | 1.00 | 17.92 | C   |
| ATOM | 3371 | OG  | SER | A | 427 | 12.541 | 4.586  | 32.668 | 1.00 | 14.61 | O   |
| ATOM | 3372 | N   | ARG | A | 428 | 10.786 | 7.547  | 30.152 | 1.00 | 15.97 | N   |
| ATOM | 3373 | CA  | ARG | A | 428 | 10.307 | 8.758  | 29.451 | 1.00 | 19.71 | C   |
| ATOM | 3374 | C   | ARG | A | 428 | 9.104  | 8.551  | 28.504 | 1.00 | 19.67 | C   |
| ATOM | 3375 | O   | ARG | A | 428 | 8.208  | 9.395  | 28.438 | 1.00 | 20.46 | O   |
| ATOM | 3376 | CB  | ARG | A | 428 | 11.447 | 9.463  | 28.679 | 1.00 | 17.27 | C   |
| ATOM | 3377 | CG  | ARG | A | 428 | 12.600 | 8.580  | 28.234 | 1.00 | 13.84 | C   |
| ATOM | 3378 | CD  | ARG | A | 428 | 13.345 | 9.187  | 27.075 | 1.00 | 12.03 | C   |
| ATOM | 3379 | NE  | ARG | A | 428 | 13.832 | 10.531 | 27.369 | 1.00 | 13.38 | N   |
| ATOM | 3380 | CZ  | ARG | A | 428 | 13.437 | 11.648 | 26.750 | 1.00 | 12.65 | C   |
| ATOM | 3381 | NH1 | ARG | A | 428 | 12.447 | 11.635 | 25.863 | 1.00 | 7.48  | N1+ |
| ATOM | 3382 | NH2 | ARG | A | 428 | 14.028 | 12.800 | 27.040 | 1.00 | 10.10 | N   |
| ATOM | 3383 | N   | ASN | A | 429 | 9.094  | 7.458  | 27.750 | 1.00 | 20.12 | N   |
| ATOM | 3384 | CA  | ASN | A | 429 | 7.972  | 7.177  | 26.876 | 1.00 | 20.34 | C   |
| ATOM | 3385 | C   | ASN | A | 429 | 6.612  | 7.140  | 27.579 | 1.00 | 20.43 | C   |
| ATOM | 3386 | O   | ASN | A | 429 | 5.772  | 7.993  | 27.303 | 1.00 | 23.09 | O   |
| ATOM | 3387 | CB  | ASN | A | 429 | 8.215  | 5.903  | 26.081 | 1.00 | 19.92 | C   |
| ATOM | 3388 | CG  | ASN | A | 429 | 8.527  | 6.196  | 24.626 | 1.00 | 23.69 | C   |
| ATOM | 3389 | ND2 | ASN | A | 429 | 9.313  | 7.253  | 24.394 | 1.00 | 24.44 | N   |
| ATOM | 3390 | OD1 | ASN | A | 429 | 7.988  | 5.552  | 23.716 | 1.00 | 23.46 | O   |
| ATOM | 3391 | N   | LEU | A | 430 | 6.418  | 6.233  | 28.542 | 1.00 | 18.98 | N   |
| ATOM | 3392 | CA  | LEU | A | 430 | 5.201  | 6.222  | 29.366 | 1.00 | 13.10 | C   |
| ATOM | 3393 | C   | LEU | A | 430 | 5.217  | 7.456  | 30.222 | 1.00 | 13.42 | C   |
| ATOM | 3394 | O   | LEU | A | 430 | 4.270  | 7.738  | 30.921 | 1.00 | 14.99 | O   |
| ATOM | 3395 | CB  | LEU | A | 430 | 5.120  | 4.968  | 30.239 | 1.00 | 7.34  | C   |
| ATOM | 3396 | CG  | LEU | A | 430 | 5.092  | 4.992  | 31.769 | 1.00 | 2.61  | C   |
| ATOM | 3397 | CD1 | LEU | A | 430 | 4.894  | 3.578  | 32.284 | 1.00 | 3.10  | C   |
| ATOM | 3398 | CD2 | LEU | A | 430 | 6.381  | 5.518  | 32.313 | 1.00 | 2.00  | C   |
| ATOM | 3399 | N   | GLY | A | 431 | 6.352  | 8.135  | 30.244 | 1.00 | 16.38 | N   |
| ATOM | 3400 | CA  | GLY | A | 431 | 6.351  | 9.513  | 30.682 | 1.00 | 17.97 | C   |
| ATOM | 3401 | C   | GLY | A | 431 | 5.371  | 10.263 | 29.810 | 1.00 | 17.99 | C   |
| ATOM | 3402 | O   | GLY | A | 431 | 4.290  | 10.586 | 30.285 | 1.00 | 20.37 | O   |
| ATOM | 3403 | N   | LYS | A | 432 | 5.621  | 10.252 | 28.499 | 1.00 | 16.66 | N   |
| ATOM | 3404 | CA  | LYS | A | 432 | 4.947  | 11.127 | 27.524 | 1.00 | 15.91 | C   |
| ATOM | 3405 | C   | LYS | A | 432 | 3.429  | 11.034 | 27.418 | 1.00 | 15.02 | C   |
| ATOM | 3406 | O   | LYS | A | 432 | 2.850  | 11.519 | 26.453 | 1.00 | 11.29 | O   |
| ATOM | 3407 | CB  | LYS | A | 432 | 5.525  | 10.900 | 26.135 | 1.00 | 16.80 | C   |
| ATOM | 3408 | CG  | LYS | A | 432 | 7.003  | 11.220 | 25.997 | 1.00 | 18.19 | C   |
| ATOM | 3409 | CD  | LYS | A | 432 | 7.359  | 11.418 | 24.526 | 1.00 | 19.26 | C   |
| ATOM | 3410 | CE  | LYS | A | 432 | 8.406  | 10.405 | 24.082 | 1.00 | 22.95 | C   |
| ATOM | 3411 | NZ  | LYS | A | 432 | 8.438  | 10.312 | 22.595 | 1.00 | 27.31 | N1+ |
| ATOM | 3412 | N   | VAL | A | 433 | 2.802  | 10.333 | 28.356 | 1.00 | 16.94 | N   |
| ATOM | 3413 | CA  | VAL | A | 433 | 1.353  | 10.328 | 28.507 | 1.00 | 15.68 | C   |
| ATOM | 3414 | C   | VAL | A | 433 | 0.985  | 11.622 | 29.194 | 1.00 | 14.62 | C   |
| ATOM | 3415 | O   | VAL | A | 433 | 0.140  | 12.354 | 28.707 | 1.00 | 18.83 | O   |
| ATOM | 3416 | CB  | VAL | A | 433 | 0.878  | 9.124  | 29.363 | 1.00 | 16.06 | C   |
| ATOM | 3417 | CG1 | VAL | A | 433 | -0.188 | 9.552  | 30.376 | 1.00 | 15.00 | C   |
| ATOM | 3418 | CG2 | VAL | A | 433 | 0.367  | 8.019  | 28.463 | 1.00 | 10.29 | C   |
| ATOM | 3419 | N   | GLY | A | 434 | 1.701  | 11.967 | 30.251 | 1.00 | 13.40 | N   |
| ATOM | 3420 | CA  | GLY | A | 434 | 1.392  | 13.190 | 30.969 | 1.00 | 17.13 | C   |
| ATOM | 3421 | C   | GLY | A | 434 | 1.177  | 14.348 | 30.013 | 1.00 | 18.55 | C   |
| ATOM | 3422 | O   | GLY | A | 434 | 0.108  | 14.946 | 29.981 | 1.00 | 17.84 | O   |
| ATOM | 3423 | N   | SER | A | 435 | 2.091  | 14.472 | 29.063 | 1.00 | 20.65 | N   |
| ATOM | 3424 | CA  | SER | A | 435 | 2.031  | 15.533 | 28.073 | 1.00 | 21.99 | C   |
| ATOM | 3425 | C   | SER | A | 435 | 0.790  | 15.331 | 27.200 | 1.00 | 22.53 | C   |
| ATOM | 3426 | O   | SER | A | 435 | -0.251 | 15.929 | 27.471 | 1.00 | 22.40 | O   |
| ATOM | 3427 | CB  | SER | A | 435 | 3.329  | 15.553 | 27.221 | 1.00 | 25.26 | C   |
| ATOM | 3428 | OG  | SER | A | 435 | 4.523  | 15.746 | 28.007 | 1.00 | 22.37 | O   |
| ATOM | 3429 | N   | LYS | A | 436 | 0.832  | 14.330 | 26.322 | 1.00 | 23.94 | N   |
| ATOM | 3430 | CA  | LYS | A | 436 | -0.157 | 14.181 | 25.250 | 1.00 | 25.08 | C   |
| ATOM | 3431 | C   | LYS | A | 436 | -1.528 | 13.626 | 25.661 | 1.00 | 24.18 | C   |

|      |      |     |     |   |     |         |        |        |      |       |     |
|------|------|-----|-----|---|-----|---------|--------|--------|------|-------|-----|
| ATOM | 3432 | O   | LYS | A | 436 | -2.216  | 13.046 | 24.827 | 1.00 | 26.29 | O   |
| ATOM | 3433 | CB  | LYS | A | 436 | 0.410   | 13.295 | 24.120 | 1.00 | 27.26 | C   |
| ATOM | 3434 | CG  | LYS | A | 436 | -0.211  | 13.540 | 22.713 | 1.00 | 29.66 | C   |
| ATOM | 3435 | CD  | LYS | A | 436 | -0.836  | 12.276 | 22.091 | 1.00 | 28.08 | C   |
| ATOM | 3436 | CE  | LYS | A | 436 | -2.362  | 12.442 | 21.910 | 1.00 | 28.14 | C   |
| ATOM | 3437 | NZ  | LYS | A | 436 | -3.079  | 11.155 | 21.561 | 1.00 | 26.79 | N1+ |
| ATOM | 3438 | N   | CYS | A | 437 | -1.959  | 13.825 | 26.903 | 1.00 | 22.66 | N   |
| ATOM | 3439 | CA  | CYS | A | 437 | -3.299  | 13.371 | 27.287 | 1.00 | 22.80 | C   |
| ATOM | 3440 | C   | CYS | A | 437 | -3.940  | 14.098 | 28.461 | 1.00 | 22.95 | C   |
| ATOM | 3441 | O   | CYS | A | 437 | -5.118  | 14.394 | 28.420 | 1.00 | 23.92 | O   |
| ATOM | 3442 | CB  | CYS | A | 437 | -3.317  | 11.854 | 27.520 | 1.00 | 19.38 | C   |
| ATOM | 3443 | SG  | CYS | A | 437 | -3.502  | 10.914 | 25.959 | 1.00 | 24.98 | S   |
| ATOM | 3444 | N   | CYS | A | 438 | -3.170  | 14.449 | 29.484 | 1.00 | 23.70 | N   |
| ATOM | 3445 | CA  | CYS | A | 438 | -3.717  | 15.267 | 30.546 | 1.00 | 22.08 | C   |
| ATOM | 3446 | C   | CYS | A | 438 | -4.216  | 16.551 | 29.900 | 1.00 | 23.11 | C   |
| ATOM | 3447 | O   | CYS | A | 438 | -5.390  | 16.891 | 30.012 | 1.00 | 23.14 | O   |
| ATOM | 3448 | CB  | CYS | A | 438 | -2.650  | 15.582 | 31.595 | 1.00 | 19.90 | C   |
| ATOM | 3449 | SG  | CYS | A | 438 | -1.760  | 14.132 | 32.242 | 1.00 | 17.60 | S   |
| ATOM | 3450 | N   | LYS | A | 439 | -3.378  | 17.119 | 29.037 | 1.00 | 25.03 | N   |
| ATOM | 3451 | CA  | LYS | A | 439 | -3.676  | 18.377 | 28.346 | 1.00 | 25.75 | C   |
| ATOM | 3452 | C   | LYS | A | 439 | -4.672  | 18.082 | 27.239 | 1.00 | 25.01 | C   |
| ATOM | 3453 | O   | LYS | A | 439 | -4.405  | 18.336 | 26.059 | 1.00 | 22.62 | O   |
| ATOM | 3454 | CB  | LYS | A | 439 | -2.385  | 18.981 | 27.761 | 1.00 | 27.02 | C   |
| ATOM | 3455 | CG  | LYS | A | 439 | -2.044  | 20.364 | 28.297 | 1.00 | 26.58 | C   |
| ATOM | 3456 | CD  | LYS | A | 439 | -0.569  | 20.490 | 28.681 | 1.00 | 25.12 | C   |
| ATOM | 3457 | CE  | LYS | A | 439 | -0.261  | 21.909 | 29.205 | 1.00 | 26.40 | C   |
| ATOM | 3458 | NZ  | LYS | A | 439 | 1.186   | 22.172 | 29.539 | 1.00 | 24.08 | N1+ |
| ATOM | 3459 | N   | HIS | A | 440 | -5.835  | 17.575 | 27.646 | 1.00 | 25.71 | N   |
| ATOM | 3460 | CA  | HIS | A | 440 | -6.781  | 16.952 | 26.733 | 1.00 | 25.96 | C   |
| ATOM | 3461 | C   | HIS | A | 440 | -8.119  | 16.494 | 27.332 | 1.00 | 26.52 | C   |
| ATOM | 3462 | O   | HIS | A | 440 | -8.967  | 16.005 | 26.602 | 1.00 | 27.11 | O   |
| ATOM | 3463 | CB  | HIS | A | 440 | -6.108  | 15.762 | 26.054 | 1.00 | 24.62 | C   |
| ATOM | 3464 | CG  | HIS | A | 440 | -7.055  | 14.877 | 25.323 | 1.00 | 20.53 | C   |
| ATOM | 3465 | CD2 | HIS | A | 440 | -7.449  | 13.606 | 25.559 | 1.00 | 20.18 | C   |
| ATOM | 3466 | ND1 | HIS | A | 440 | -7.787  | 15.313 | 24.247 | 1.00 | 21.98 | N   |
| ATOM | 3467 | CE1 | HIS | A | 440 | -8.575  | 14.341 | 23.830 | 1.00 | 22.57 | C   |
| ATOM | 3468 | NE2 | HIS | A | 440 | -8.386  | 13.291 | 24.607 | 1.00 | 20.14 | N   |
| ATOM | 3469 | N   | PRO | A | 441 | -8.400  | 16.840 | 28.595 | 1.00 | 28.45 | N   |
| ATOM | 3470 | CA  | PRO | A | 441 | -9.107  | 15.970 | 29.553 | 1.00 | 30.20 | C   |
| ATOM | 3471 | C   | PRO | A | 441 | -10.490 | 15.409 | 29.137 | 1.00 | 30.12 | C   |
| ATOM | 3472 | O   | PRO | A | 441 | -10.683 | 15.001 | 27.984 | 1.00 | 28.70 | O   |
| ATOM | 3473 | CB  | PRO | A | 441 | -9.202  | 16.838 | 30.811 | 1.00 | 32.36 | C   |
| ATOM | 3474 | CG  | PRO | A | 441 | -9.186  | 18.258 | 30.292 | 1.00 | 32.89 | C   |
| ATOM | 3475 | CD  | PRO | A | 441 | -8.282  | 18.229 | 29.090 | 1.00 | 30.04 | C   |
| ATOM | 3476 | N   | GLU | A | 442 | -11.410 | 15.285 | 30.101 | 1.00 | 29.30 | N   |
| ATOM | 3477 | CA  | GLU | A | 442 | -12.751 | 14.720 | 29.866 | 1.00 | 29.85 | C   |
| ATOM | 3478 | C   | GLU | A | 442 | -12.863 | 13.169 | 29.936 | 1.00 | 28.51 | C   |
| ATOM | 3479 | O   | GLU | A | 442 | -12.375 | 12.533 | 30.885 | 1.00 | 22.26 | O   |
| ATOM | 3480 | CB  | GLU | A | 442 | -13.324 | 15.201 | 28.507 | 1.00 | 29.58 | C   |
| ATOM | 3481 | CG  | GLU | A | 442 | -13.697 | 16.673 | 28.422 | 1.00 | 26.93 | C   |
| ATOM | 3482 | CD  | GLU | A | 442 | -12.757 | 17.475 | 27.541 | 1.00 | 25.31 | C   |
| ATOM | 3483 | OE1 | GLU | A | 442 | -11.572 | 17.123 | 27.442 | 1.00 | 20.53 | O   |
| ATOM | 3484 | OE2 | GLU | A | 442 | -13.192 | 18.505 | 26.974 | 1.00 | 28.11 | O1- |
| ATOM | 3485 | N   | ALA | A | 443 | -13.822 | 12.669 | 29.147 | 1.00 | 27.70 | N   |
| ATOM | 3486 | CA  | ALA | A | 443 | -13.825 | 11.304 | 28.638 | 1.00 | 26.01 | C   |
| ATOM | 3487 | C   | ALA | A | 443 | -12.551 | 11.111 | 27.852 | 1.00 | 24.19 | C   |
| ATOM | 3488 | O   | ALA | A | 443 | -11.639 | 10.447 | 28.316 | 1.00 | 26.28 | O   |
| ATOM | 3489 | CB  | ALA | A | 443 | -15.016 | 11.089 | 27.708 | 1.00 | 26.77 | C   |
| ATOM | 3490 | N   | LYS | A | 444 | -12.411 | 11.892 | 26.788 | 1.00 | 22.05 | N   |
| ATOM | 3491 | CA  | LYS | A | 444 | -11.370 | 11.674 | 25.785 | 1.00 | 21.39 | C   |
| ATOM | 3492 | C   | LYS | A | 444 | -10.000 | 11.321 | 26.357 | 1.00 | 20.82 | C   |
| ATOM | 3493 | O   | LYS | A | 444 | -9.137  | 10.831 | 25.620 | 1.00 | 18.13 | O   |
| ATOM | 3494 | CB  | LYS | A | 444 | -11.248 | 12.911 | 24.894 | 1.00 | 22.35 | C   |
| ATOM | 3495 | CG  | LYS | A | 444 | -11.775 | 12.721 | 23.484 | 1.00 | 22.26 | C   |
| ATOM | 3496 | CD  | LYS | A | 444 | -13.306 | 12.807 | 23.457 | 1.00 | 20.62 | C   |
| ATOM | 3497 | CE  | LYS | A | 444 | -13.783 | 14.030 | 22.666 | 1.00 | 18.58 | C   |
| ATOM | 3498 | NZ  | LYS | A | 444 | -13.011 | 15.272 | 22.977 | 1.00 | 15.81 | N1+ |
| ATOM | 3499 | N   | ARG | A | 445 | -9.762  | 11.777 | 27.594 | 1.00 | 20.03 | N   |
| ATOM | 3500 | CA  | ARG | A | 445 | -8.614  | 11.392 | 28.429 | 1.00 | 18.49 | C   |
| ATOM | 3501 | C   | ARG | A | 445 | -8.397  | 9.892  | 28.555 | 1.00 | 19.53 | C   |
| ATOM | 3502 | O   | ARG | A | 445 | -7.514  | 9.343  | 27.914 | 1.00 | 21.22 | O   |

|      |      |     |     |   |     |         |        |        |      |       |     |
|------|------|-----|-----|---|-----|---------|--------|--------|------|-------|-----|
| ATOM | 3503 | CB  | ARG | A | 445 | -8.758  | 11.970 | 29.830 | 1.00 | 14.76 | C   |
| ATOM | 3504 | CG  | ARG | A | 445 | -7.643  | 11.580 | 30.764 | 1.00 | 10.97 | C   |
| ATOM | 3505 | CD  | ARG | A | 445 | -7.994  | 11.871 | 32.222 | 1.00 | 11.73 | C   |
| ATOM | 3506 | NE  | ARG | A | 445 | -8.114  | 13.288 | 32.629 | 1.00 | 13.19 | N   |
| ATOM | 3507 | CZ  | ARG | A | 445 | -7.458  | 14.336 | 32.122 | 1.00 | 9.58  | C   |
| ATOM | 3508 | NH1 | ARG | A | 445 | -6.945  | 14.323 | 30.899 | 1.00 | 7.80  | N1+ |
| ATOM | 3509 | NH2 | ARG | A | 445 | -7.497  | 15.482 | 32.775 | 1.00 | 6.22  | N   |
| ATOM | 3510 | N   | MET | A | 446 | -9.204  | 9.204  | 29.348 | 1.00 | 20.28 | N   |
| ATOM | 3511 | CA  | MET | A | 446 | -8.894  | 7.805  | 29.608 | 1.00 | 22.11 | C   |
| ATOM | 3512 | C   | MET | A | 446 | -8.796  | 6.892  | 28.368 | 1.00 | 21.20 | C   |
| ATOM | 3513 | O   | MET | A | 446 | -7.843  | 6.105  | 28.273 | 1.00 | 21.62 | O   |
| ATOM | 3514 | CB  | MET | A | 446 | -9.830  | 7.188  | 30.659 | 1.00 | 22.74 | C   |
| ATOM | 3515 | CG  | MET | A | 446 | -9.620  | 5.693  | 30.794 | 1.00 | 24.58 | C   |
| ATOM | 3516 | SD  | MET | A | 446 | -9.860  | 4.949  | 32.408 | 1.00 | 28.20 | S   |
| ATOM | 3517 | CE  | MET | A | 446 | -11.076 | 3.660  | 31.945 | 1.00 | 22.67 | C   |
| ATOM | 3518 | N   | PRO | A | 447 | -9.733  | 6.979  | 27.405 | 1.00 | 20.32 | N   |
| ATOM | 3519 | CA  | PRO | A | 447 | -9.574  | 6.042  | 26.294 | 1.00 | 22.10 | C   |
| ATOM | 3520 | C   | PRO | A | 447 | -8.133  | 6.079  | 25.772 | 1.00 | 23.45 | C   |
| ATOM | 3521 | O   | PRO | A | 447 | -7.541  | 5.014  | 25.563 | 1.00 | 25.75 | O   |
| ATOM | 3522 | CB  | PRO | A | 447 | -10.578 | 6.532  | 25.234 | 1.00 | 21.91 | C   |
| ATOM | 3523 | CG  | PRO | A | 447 | -11.561 | 7.311  | 25.970 | 1.00 | 20.33 | C   |
| ATOM | 3524 | CD  | PRO | A | 447 | -10.792 | 7.962  | 27.113 | 1.00 | 22.51 | C   |
| ATOM | 3525 | N   | CYS | A | 448 | -7.509  | 7.266  | 25.813 | 1.00 | 21.39 | N   |
| ATOM | 3526 | CA  | CYS | A | 448 | -6.156  | 7.436  | 25.279 | 1.00 | 19.05 | C   |
| ATOM | 3527 | C   | CYS | A | 448 | -5.183  | 6.767  | 26.222 | 1.00 | 18.85 | C   |
| ATOM | 3528 | O   | CYS | A | 448 | -4.317  | 6.025  | 25.775 | 1.00 | 21.92 | O   |
| ATOM | 3529 | CB  | CYS | A | 448 | -5.756  | 8.916  | 25.173 | 1.00 | 19.04 | C   |
| ATOM | 3530 | SG  | CYS | A | 448 | -4.591  | 9.295  | 26.505 | 1.00 | 20.87 | S   |
| ATOM | 3531 | N   | ALA | A | 449 | -5.386  | 6.971  | 27.527 | 1.00 | 17.31 | N   |
| ATOM | 3532 | CA  | ALA | A | 449 | -4.314  | 6.924  | 28.522 | 1.00 | 13.97 | C   |
| ATOM | 3533 | C   | ALA | A | 449 | -4.209  | 5.679  | 29.390 | 1.00 | 16.06 | C   |
| ATOM | 3534 | O   | ALA | A | 449 | -3.241  | 5.544  | 30.100 | 1.00 | 20.40 | O   |
| ATOM | 3535 | CB  | ALA | A | 449 | -4.376  | 8.142  | 29.409 | 1.00 | 10.09 | C   |
| ATOM | 3536 | N   | GLU | A | 450 | -5.188  | 4.780  | 29.374 | 1.00 | 17.26 | N   |
| ATOM | 3537 | CA  | GLU | A | 450 | -4.941  | 3.417  | 29.855 | 1.00 | 16.55 | C   |
| ATOM | 3538 | C   | GLU | A | 450 | -4.304  | 2.693  | 28.672 | 1.00 | 18.65 | C   |
| ATOM | 3539 | O   | GLU | A | 450 | -3.139  | 2.330  | 28.712 | 1.00 | 18.04 | O   |
| ATOM | 3540 | CB  | GLU | A | 450 | -6.245  | 2.725  | 30.241 | 1.00 | 17.28 | C   |
| ATOM | 3541 | CG  | GLU | A | 450 | -6.151  | 1.924  | 31.533 | 1.00 | 15.50 | C   |
| ATOM | 3542 | CD  | GLU | A | 450 | -7.098  | 0.716  | 31.585 | 1.00 | 18.82 | C   |
| ATOM | 3543 | OE1 | GLU | A | 450 | -8.213  | 0.768  | 31.027 | 1.00 | 17.57 | O   |
| ATOM | 3544 | OE2 | GLU | A | 450 | -6.726  | -0.310 | 32.195 | 1.00 | 21.24 | O1- |
| ATOM | 3545 | N   | ASP | A | 451 | -4.985  | 2.799  | 27.531 | 1.00 | 19.88 | N   |
| ATOM | 3546 | CA  | ASP | A | 451 | -4.495  | 2.392  | 26.213 | 1.00 | 18.66 | C   |
| ATOM | 3547 | C   | ASP | A | 451 | -3.055  | 2.711  | 25.815 | 1.00 | 18.58 | C   |
| ATOM | 3548 | O   | ASP | A | 451 | -2.341  | 1.810  | 25.397 | 1.00 | 20.61 | O   |
| ATOM | 3549 | CB  | ASP | A | 451 | -5.435  | 2.927  | 25.140 | 1.00 | 17.00 | C   |
| ATOM | 3550 | CG  | ASP | A | 451 | -6.675  | 2.088  | 25.009 | 1.00 | 19.38 | C   |
| ATOM | 3551 | OD1 | ASP | A | 451 | -6.556  | 0.869  | 25.262 | 1.00 | 16.86 | O   |
| ATOM | 3552 | OD2 | ASP | A | 451 | -7.762  | 2.634  | 24.690 | 1.00 | 19.70 | O1- |
| ATOM | 3553 | N   | TYR | A | 452 | -2.658  | 3.981  | 25.827 | 1.00 | 16.13 | N   |
| ATOM | 3554 | CA  | TYR | A | 452 | -1.281  | 4.344  | 25.489 | 1.00 | 15.08 | C   |
| ATOM | 3555 | C   | TYR | A | 452 | -0.335  | 3.655  | 26.464 | 1.00 | 16.14 | C   |
| ATOM | 3556 | O   | TYR | A | 452 | 0.481   | 2.837  | 26.070 | 1.00 | 17.95 | O   |
| ATOM | 3557 | CB  | TYR | A | 452 | -1.093  | 5.854  | 25.560 | 1.00 | 13.93 | C   |
| ATOM | 3558 | CG  | TYR | A | 452 | 0.277   | 6.331  | 25.144 | 1.00 | 15.16 | C   |
| ATOM | 3559 | CD1 | TYR | A | 452 | 1.381   | 6.207  | 25.995 | 1.00 | 13.94 | C   |
| ATOM | 3560 | CD2 | TYR | A | 452 | 0.463   | 6.960  | 23.919 | 1.00 | 15.41 | C   |
| ATOM | 3561 | CE1 | TYR | A | 452 | 2.634   | 6.698  | 25.624 | 1.00 | 13.09 | C   |
| ATOM | 3562 | CE2 | TYR | A | 452 | 1.706   | 7.450  | 23.550 | 1.00 | 15.00 | C   |
| ATOM | 3563 | CZ  | TYR | A | 452 | 2.779   | 7.318  | 24.401 | 1.00 | 12.67 | C   |
| ATOM | 3564 | OH  | TYR | A | 452 | 3.973   | 7.861  | 24.029 | 1.00 | 11.49 | O   |
| ATOM | 3565 | N   | LEU | A | 453 | -0.498  | 3.931  | 27.751 | 1.00 | 16.23 | N   |
| ATOM | 3566 | CA  | LEU | A | 453 | 0.196   | 3.200  | 28.794 | 1.00 | 13.79 | C   |
| ATOM | 3567 | C   | LEU | A | 453 | 0.231   | 1.710  | 28.457 | 1.00 | 13.05 | C   |
| ATOM | 3568 | O   | LEU | A | 453 | 1.301   | 1.125  | 28.413 | 1.00 | 15.56 | O   |
| ATOM | 3569 | CB  | LEU | A | 453 | -0.502  | 3.427  | 30.135 | 1.00 | 11.83 | C   |
| ATOM | 3570 | CG  | LEU | A | 453 | 0.131   | 4.454  | 31.073 | 1.00 | 13.55 | C   |
| ATOM | 3571 | CD1 | LEU | A | 453 | -0.933  | 5.105  | 31.932 | 1.00 | 11.05 | C   |
| ATOM | 3572 | CD2 | LEU | A | 453 | 1.178   | 3.782  | 31.944 | 1.00 | 10.99 | C   |
| ATOM | 3573 | N   | SER | A | 454 | -0.879  | 1.181  | 27.955 | 1.00 | 11.72 | N   |

|      |      |     |     |   |     |        |        |        |      |       |   |
|------|------|-----|-----|---|-----|--------|--------|--------|------|-------|---|
| ATOM | 3574 | CA  | SER | A | 454 | -0.980 | -0.244 | 27.649 | 1.00 | 11.87 | C |
| ATOM | 3575 | C   | SER | A | 454 | -0.003 | -0.699 | 26.557 | 1.00 | 12.13 | C |
| ATOM | 3576 | O   | SER | A | 454 | 0.518  | -1.825 | 26.598 | 1.00 | 8.69  | O |
| ATOM | 3577 | CB  | SER | A | 454 | -2.408 | -0.605 | 27.220 | 1.00 | 14.00 | C |
| ATOM | 3578 | OG  | SER | A | 454 | -3.390 | 0.232  | 27.809 | 1.00 | 11.75 | O |
| ATOM | 3579 | N   | VAL | A | 455 | 0.155  | 0.154  | 25.543 | 1.00 | 11.63 | N |
| ATOM | 3580 | CA  | VAL | A | 455 | 1.107  | -0.046 | 24.450 | 1.00 | 10.07 | C |
| ATOM | 3581 | C   | VAL | A | 455 | 2.516  | -0.105 | 25.015 | 1.00 | 11.00 | C |
| ATOM | 3582 | O   | VAL | A | 455 | 3.288  | -0.996 | 24.675 | 1.00 | 10.74 | O |
| ATOM | 3583 | CB  | VAL | A | 455 | 1.075  | 1.128  | 23.425 | 1.00 | 11.18 | C |
| ATOM | 3584 | CG1 | VAL | A | 455 | 2.127  | 0.913  | 22.352 | 1.00 | 10.50 | C |
| ATOM | 3585 | CG2 | VAL | A | 455 | -0.299 | 1.283  | 22.809 | 1.00 | 6.79  | C |
| ATOM | 3586 | N   | VAL | A | 456 | 2.858  | 0.864  | 25.861 | 1.00 | 12.33 | N |
| ATOM | 3587 | CA  | VAL | A | 456 | 4.227  | 1.008  | 26.324 | 1.00 | 15.30 | C |
| ATOM | 3588 | C   | VAL | A | 456 | 4.669  | -0.208 | 27.125 | 1.00 | 18.48 | C |
| ATOM | 3589 | O   | VAL | A | 456 | 5.671  | -0.858 | 26.797 | 1.00 | 21.87 | O |
| ATOM | 3590 | CB  | VAL | A | 456 | 4.399  | 2.248  | 27.164 | 1.00 | 13.68 | C |
| ATOM | 3591 | CG1 | VAL | A | 456 | 5.777  | 2.285  | 27.727 | 1.00 | 14.03 | C |
| ATOM | 3592 | CG2 | VAL | A | 456 | 4.167  | 3.460  | 26.316 | 1.00 | 17.71 | C |
| ATOM | 3593 | N   | LEU | A | 457 | 3.867  | -0.585 | 28.110 | 1.00 | 18.16 | N |
| ATOM | 3594 | CA  | LEU | A | 457 | 4.124  | -1.806 | 28.837 | 1.00 | 17.51 | C |
| ATOM | 3595 | C   | LEU | A | 457 | 4.406  | -2.967 | 27.856 | 1.00 | 19.56 | C |
| ATOM | 3596 | O   | LEU | A | 457 | 5.322  | -3.758 | 28.077 | 1.00 | 23.05 | O |
| ATOM | 3597 | CB  | LEU | A | 457 | 2.943  | -2.096 | 29.782 | 1.00 | 14.10 | C |
| ATOM | 3598 | CG  | LEU | A | 457 | 3.038  | -1.457 | 31.183 | 1.00 | 10.11 | C |
| ATOM | 3599 | CD1 | LEU | A | 457 | 3.844  | -0.180 | 31.147 | 1.00 | 6.96  | C |
| ATOM | 3600 | CD2 | LEU | A | 457 | 1.668  | -1.183 | 31.723 | 1.00 | 6.91  | C |
| ATOM | 3601 | N   | ASN | A | 458 | 3.820  | -2.914 | 26.666 | 1.00 | 19.26 | N |
| ATOM | 3602 | CA  | ASN | A | 458 | 4.044  | -3.982 | 25.696 | 1.00 | 20.09 | C |
| ATOM | 3603 | C   | ASN | A | 458 | 5.403  | -3.848 | 25.054 | 1.00 | 20.20 | C |
| ATOM | 3604 | O   | ASN | A | 458 | 6.144  | -4.823 | 25.000 | 1.00 | 22.87 | O |
| ATOM | 3605 | CB  | ASN | A | 458 | 2.967  | -3.985 | 24.622 | 1.00 | 22.45 | C |
| ATOM | 3606 | CG  | ASN | A | 458 | 3.165  | -5.070 | 23.594 | 1.00 | 23.30 | C |
| ATOM | 3607 | ND2 | ASN | A | 458 | 3.201  | -4.665 | 22.348 | 1.00 | 27.57 | N |
| ATOM | 3608 | OD1 | ASN | A | 458 | 3.122  | -6.263 | 23.895 | 1.00 | 25.73 | O |
| ATOM | 3609 | N   | GLN | A | 459 | 5.782  | -2.627 | 24.683 | 1.00 | 18.71 | N |
| ATOM | 3610 | CA  | GLN | A | 459 | 7.156  | -2.341 | 24.284 | 1.00 | 16.79 | C |
| ATOM | 3611 | C   | GLN | A | 459 | 8.104  | -2.947 | 25.318 | 1.00 | 19.53 | C |
| ATOM | 3612 | O   | GLN | A | 459 | 8.829  | -3.897 | 25.000 | 1.00 | 20.10 | O |
| ATOM | 3613 | CB  | GLN | A | 459 | 7.375  | -0.850 | 24.212 | 1.00 | 16.06 | C |
| ATOM | 3614 | CG  | GLN | A | 459 | 8.559  | -0.451 | 23.411 | 1.00 | 19.00 | C |
| ATOM | 3615 | CD  | GLN | A | 459 | 8.212  | -0.265 | 21.970 | 1.00 | 18.86 | C |
| ATOM | 3616 | NE2 | GLN | A | 459 | 7.618  | 0.865  | 21.647 | 1.00 | 18.61 | N |
| ATOM | 3617 | OE1 | GLN | A | 459 | 8.431  | -1.150 | 21.156 | 1.00 | 20.77 | O |
| ATOM | 3618 | N   | LEU | A | 460 | 7.894  | -2.591 | 26.591 | 1.00 | 19.18 | N |
| ATOM | 3619 | CA  | LEU | A | 460 | 8.570  | -3.248 | 27.725 | 1.00 | 17.82 | C |
| ATOM | 3620 | C   | LEU | A | 460 | 8.632  | -4.768 | 27.635 | 1.00 | 18.45 | C |
| ATOM | 3621 | O   | LEU | A | 460 | 9.692  | -5.338 | 27.877 | 1.00 | 21.46 | O |
| ATOM | 3622 | CB  | LEU | A | 460 | 7.919  | -2.860 | 29.063 | 1.00 | 15.63 | C |
| ATOM | 3623 | CG  | LEU | A | 460 | 8.279  | -3.617 | 30.355 | 1.00 | 14.04 | C |
| ATOM | 3624 | CD1 | LEU | A | 460 | 9.785  | -3.769 | 30.501 | 1.00 | 15.77 | C |
| ATOM | 3625 | CD2 | LEU | A | 460 | 7.747  | -2.867 | 31.555 | 1.00 | 12.12 | C |
| ATOM | 3626 | N   | CYS | A | 461 | 7.513  | -5.430 | 27.330 | 1.00 | 20.02 | N |
| ATOM | 3627 | CA  | CYS | A | 461 | 7.470  | -6.904 | 27.322 | 1.00 | 20.16 | C |
| ATOM | 3628 | C   | CYS | A | 461 | 8.172  | -7.527 | 26.121 | 1.00 | 21.18 | C |
| ATOM | 3629 | O   | CYS | A | 461 | 8.929  | -8.505 | 26.272 | 1.00 | 19.43 | O |
| ATOM | 3630 | CB  | CYS | A | 461 | 6.028  | -7.408 | 27.348 | 1.00 | 17.64 | C |
| ATOM | 3631 | SG  | CYS | A | 461 | 5.081  | -6.878 | 28.795 | 1.00 | 17.61 | S |
| ATOM | 3632 | N   | VAL | A | 462 | 7.942  | -6.920 | 24.950 | 1.00 | 21.46 | N |
| ATOM | 3633 | CA  | VAL | A | 462 | 8.437  | -7.401 | 23.660 | 1.00 | 22.27 | C |
| ATOM | 3634 | C   | VAL | A | 462 | 9.942  | -7.136 | 23.468 | 1.00 | 23.83 | C |
| ATOM | 3635 | O   | VAL | A | 462 | 10.679 | -7.973 | 22.924 | 1.00 | 22.80 | O |
| ATOM | 3636 | CB  | VAL | A | 462 | 7.672  | -6.738 | 22.517 | 1.00 | 20.37 | C |
| ATOM | 3637 | CG1 | VAL | A | 462 | 6.179  | -6.891 | 22.734 | 1.00 | 20.18 | C |
| ATOM | 3638 | CG2 | VAL | A | 462 | 8.039  | -5.304 | 22.420 | 1.00 | 17.82 | C |
| ATOM | 3639 | N   | LEU | A | 463 | 10.358 | -5.933 | 23.863 | 1.00 | 24.45 | N |
| ATOM | 3640 | CA  | LEU | A | 463 | 11.749 | -5.617 | 24.183 | 1.00 | 23.28 | C |
| ATOM | 3641 | C   | LEU | A | 463 | 12.444 | -6.794 | 24.843 | 1.00 | 23.88 | C |
| ATOM | 3642 | O   | LEU | A | 463 | 13.285 | -7.448 | 24.233 | 1.00 | 25.91 | O |
| ATOM | 3643 | CB  | LEU | A | 463 | 11.800 | -4.420 | 25.144 | 1.00 | 20.02 | C |
| ATOM | 3644 | CG  | LEU | A | 463 | 12.855 | -3.340 | 24.952 | 1.00 | 16.71 | C |

|      |      |     |     |   |     |        |         |        |      |       |     |
|------|------|-----|-----|---|-----|--------|---------|--------|------|-------|-----|
| ATOM | 3645 | CD1 | LEU | A | 463 | 13.665 | -3.676  | 23.734 | 1.00 | 14.34 | C   |
| ATOM | 3646 | CD2 | LEU | A | 463 | 12.196 | -1.970  | 24.804 | 1.00 | 15.27 | C   |
| ATOM | 3647 | N   | HIS | A | 464 | 12.115 | -7.035  | 26.106 | 1.00 | 25.21 | N   |
| ATOM | 3648 | CA  | HIS | A | 464 | 12.941 | -7.887  | 26.951 | 1.00 | 27.10 | C   |
| ATOM | 3649 | C   | HIS | A | 464 | 12.269 | -9.220  | 27.310 | 1.00 | 25.73 | C   |
| ATOM | 3650 | O   | HIS | A | 464 | 11.668 | -9.364  | 28.380 | 1.00 | 26.56 | O   |
| ATOM | 3651 | CB  | HIS | A | 464 | 13.392 | -7.121  | 28.224 | 1.00 | 27.53 | C   |
| ATOM | 3652 | CG  | HIS | A | 464 | 14.883 | -7.158  | 28.474 | 1.00 | 26.94 | C   |
| ATOM | 3653 | CD2 | HIS | A | 464 | 15.904 | -7.678  | 27.738 | 1.00 | 21.05 | C   |
| ATOM | 3654 | ND1 | HIS | A | 464 | 15.464 | -6.665  | 29.625 | 1.00 | 24.27 | N   |
| ATOM | 3655 | CE1 | HIS | A | 464 | 16.764 | -6.892  | 29.600 | 1.00 | 20.67 | C   |
| ATOM | 3656 | NE2 | HIS | A | 464 | 17.053 | -7.502  | 28.464 | 1.00 | 17.48 | N   |
| ATOM | 3657 | N   | GLU | A | 465 | 12.180 | -10.082 | 26.305 | 1.00 | 23.46 | N   |
| ATOM | 3658 | CA  | GLU | A | 465 | 12.280 | -11.518 | 26.492 | 1.00 | 21.43 | C   |
| ATOM | 3659 | C   | GLU | A | 465 | 13.764 | -11.787 | 26.213 | 1.00 | 21.62 | C   |
| ATOM | 3660 | O   | GLU | A | 465 | 14.509 | -12.216 | 27.092 | 1.00 | 20.90 | O   |
| ATOM | 3661 | CB  | GLU | A | 465 | 11.406 | -12.258 | 25.458 | 1.00 | 23.62 | C   |
| ATOM | 3662 | CG  | GLU | A | 465 | 9.867  | -12.214 | 25.681 | 1.00 | 20.17 | C   |
| ATOM | 3663 | CD  | GLU | A | 465 | 9.063  | -12.794 | 24.503 | 1.00 | 18.19 | C   |
| ATOM | 3664 | OE1 | GLU | A | 465 | 8.978  | -12.111 | 23.465 | 1.00 | 15.65 | O   |
| ATOM | 3665 | OE2 | GLU | A | 465 | 8.455  | -13.888 | 24.626 | 1.00 | 15.39 | O1- |
| ATOM | 3666 | N   | LYS | A | 466 | 14.199 | -11.367 | 25.024 | 1.00 | 22.56 | N   |
| ATOM | 3667 | CA  | LYS | A | 466 | 15.611 | -11.327 | 24.604 | 1.00 | 24.39 | C   |
| ATOM | 3668 | C   | LYS | A | 466 | 16.664 | -11.640 | 25.685 | 1.00 | 21.61 | C   |
| ATOM | 3669 | O   | LYS | A | 466 | 17.404 | -12.606 | 25.542 | 1.00 | 22.78 | O   |
| ATOM | 3670 | CB  | LYS | A | 466 | 15.899 | -9.967  | 23.918 | 1.00 | 26.20 | C   |
| ATOM | 3671 | CG  | LYS | A | 466 | 17.381 | -9.571  | 23.804 | 1.00 | 27.48 | C   |
| ATOM | 3672 | CD  | LYS | A | 466 | 17.668 | -8.239  | 24.520 | 1.00 | 26.14 | C   |
| ATOM | 3673 | CE  | LYS | A | 466 | 19.123 | -7.796  | 24.343 | 1.00 | 23.78 | C   |
| ATOM | 3674 | NZ  | LYS | A | 466 | 20.084 | -8.644  | 25.115 | 1.00 | 20.55 | N1+ |
| ATOM | 3675 | N   | THR | A | 467 | 16.826 | -10.776 | 26.681 | 1.00 | 19.96 | N   |
| ATOM | 3676 | CA  | THR | A | 467 | 17.514 | -11.183 | 27.914 | 1.00 | 22.51 | C   |
| ATOM | 3677 | C   | THR | A | 467 | 16.397 | -11.294 | 28.923 | 1.00 | 25.70 | C   |
| ATOM | 3678 | O   | THR | A | 467 | 15.585 | -10.359 | 29.041 | 1.00 | 29.10 | O   |
| ATOM | 3679 | CB  | THR | A | 467 | 18.489 | -10.112 | 28.487 | 1.00 | 16.74 | C   |
| ATOM | 3680 | CG2 | THR | A | 467 | 19.829 | -10.712 | 28.809 | 1.00 | 14.95 | C   |
| ATOM | 3681 | OG1 | THR | A | 467 | 18.653 | -9.056  | 27.550 | 1.00 | 14.94 | O   |
| ATOM | 3682 | N   | PRO | A | 468 | 16.405 | -12.344 | 29.752 | 1.00 | 25.15 | N   |
| ATOM | 3683 | CA  | PRO | A | 468 | 15.248 | -12.352 | 30.645 | 1.00 | 26.23 | C   |
| ATOM | 3684 | C   | PRO | A | 468 | 15.654 | -11.886 | 32.035 | 1.00 | 25.34 | C   |
| ATOM | 3685 | O   | PRO | A | 468 | 16.667 | -12.324 | 32.567 | 1.00 | 24.12 | O   |
| ATOM | 3686 | CB  | PRO | A | 468 | 14.786 | -13.809 | 30.609 | 1.00 | 27.92 | C   |
| ATOM | 3687 | CG  | PRO | A | 468 | 15.621 | -14.461 | 29.496 | 1.00 | 26.78 | C   |
| ATOM | 3688 | CD  | PRO | A | 468 | 16.904 | -13.702 | 29.528 | 1.00 | 23.56 | C   |
| ATOM | 3689 | N   | VAL | A | 469 | 14.900 | -10.945 | 32.589 | 1.00 | 26.09 | N   |
| ATOM | 3690 | CA  | VAL | A | 469 | 15.269 | -10.322 | 33.863 | 1.00 | 26.57 | C   |
| ATOM | 3691 | C   | VAL | A | 469 | 14.259 | -10.507 | 35.043 | 1.00 | 26.29 | C   |
| ATOM | 3692 | O   | VAL | A | 469 | 14.272 | -11.537 | 35.720 | 1.00 | 25.05 | O   |
| ATOM | 3693 | CB  | VAL | A | 469 | 15.609 | -8.808  | 33.643 | 1.00 | 25.96 | C   |
| ATOM | 3694 | CG1 | VAL | A | 469 | 17.067 | -8.663  | 33.262 | 1.00 | 23.63 | C   |
| ATOM | 3695 | CG2 | VAL | A | 469 | 14.723 | -8.211  | 32.541 | 1.00 | 22.41 | C   |
| ATOM | 3696 | N   | SER | A | 470 | 13.398 | -9.520  | 35.283 | 1.00 | 24.94 | N   |
| ATOM | 3697 | CA  | SER | A | 470 | 12.584 | -9.486  | 36.492 | 1.00 | 25.10 | C   |
| ATOM | 3698 | C   | SER | A | 470 | 11.436 | -10.470 | 36.378 | 1.00 | 26.22 | C   |
| ATOM | 3699 | O   | SER | A | 470 | 10.438 | -10.196 | 35.697 | 1.00 | 27.50 | O   |
| ATOM | 3700 | CB  | SER | A | 470 | 12.021 | -8.070  | 36.744 | 1.00 | 24.74 | C   |
| ATOM | 3701 | OG  | SER | A | 470 | 11.640 | -7.884  | 38.110 | 1.00 | 22.77 | O   |
| ATOM | 3702 | N   | ASP | A | 471 | 11.516 | -11.553 | 37.145 | 1.00 | 25.67 | N   |
| ATOM | 3703 | CA  | ASP | A | 471 | 10.504 | -12.596 | 37.091 | 1.00 | 25.01 | C   |
| ATOM | 3704 | C   | ASP | A | 471 | 9.126  | -11.976 | 37.245 | 1.00 | 26.17 | C   |
| ATOM | 3705 | O   | ASP | A | 471 | 8.146  | -12.438 | 36.640 | 1.00 | 27.11 | O   |
| ATOM | 3706 | CB  | ASP | A | 471 | 10.765 | -13.620 | 38.175 | 1.00 | 23.33 | C   |
| ATOM | 3707 | CG  | ASP | A | 471 | 12.078 | -14.320 | 37.978 | 1.00 | 25.27 | C   |
| ATOM | 3708 | OD1 | ASP | A | 471 | 13.125 | -13.757 | 38.359 | 1.00 | 29.79 | O   |
| ATOM | 3709 | OD2 | ASP | A | 471 | 12.086 | -15.384 | 37.335 | 1.00 | 29.40 | O1- |
| ATOM | 3710 | N   | ARG | A | 472 | 9.108  | -10.793 | 37.853 | 1.00 | 25.75 | N   |
| ATOM | 3711 | CA  | ARG | A | 472 | 7.884  | -10.014 | 37.949 | 1.00 | 26.02 | C   |
| ATOM | 3712 | C   | ARG | A | 472 | 7.420  | -9.534  | 36.583 | 1.00 | 26.00 | C   |
| ATOM | 3713 | O   | ARG | A | 472 | 6.279  | -9.785  | 36.182 | 1.00 | 26.81 | O   |
| ATOM | 3714 | CB  | ARG | A | 472 | 8.098  | -8.836  | 38.897 | 1.00 | 25.19 | C   |
| ATOM | 3715 | CG  | ARG | A | 472 | 8.527  | -9.296  | 40.283 | 1.00 | 24.67 | C   |

|      |      |     |     |   |     |        |         |        |      |       |     |
|------|------|-----|-----|---|-----|--------|---------|--------|------|-------|-----|
| ATOM | 3716 | CD  | ARG | A | 472 | 7.413  | -9.145  | 41.277 | 1.00 | 20.81 | C   |
| ATOM | 3717 | NE  | ARG | A | 472 | 7.918  | -8.558  | 42.510 | 1.00 | 15.73 | N   |
| ATOM | 3718 | CZ  | ARG | A | 472 | 7.177  | -7.901  | 43.390 | 1.00 | 15.03 | C   |
| ATOM | 3719 | NH1 | ARG | A | 472 | 5.946  | -7.542  | 43.087 | 1.00 | 15.14 | N1+ |
| ATOM | 3720 | NH2 | ARG | A | 472 | 7.720  | -7.494  | 44.523 | 1.00 | 16.85 | N   |
| ATOM | 3721 | N   | VAL | A | 473 | 8.323  | -8.888  | 35.853 | 1.00 | 24.83 | N   |
| ATOM | 3722 | CA  | VAL | A | 473 | 8.029  | -8.415  | 34.512 | 1.00 | 23.45 | C   |
| ATOM | 3723 | C   | VAL | A | 473 | 7.641  | -9.624  | 33.669 | 1.00 | 22.85 | C   |
| ATOM | 3724 | O   | VAL | A | 473 | 6.743  | -9.554  | 32.840 | 1.00 | 22.94 | O   |
| ATOM | 3725 | CB  | VAL | A | 473 | 9.259  | -7.717  | 33.873 | 1.00 | 25.33 | C   |
| ATOM | 3726 | CG1 | VAL | A | 473 | 8.869  | -7.093  | 32.530 | 1.00 | 23.20 | C   |
| ATOM | 3727 | CG2 | VAL | A | 473 | 9.845  | -6.670  | 34.828 | 1.00 | 19.55 | C   |
| ATOM | 3728 | N   | THR | A | 474 | 8.260  | -10.755 | 33.947 | 1.00 | 21.09 | N   |
| ATOM | 3729 | CA  | THR | A | 474 | 7.847  | -11.976 | 33.298 | 1.00 | 24.95 | C   |
| ATOM | 3730 | C   | THR | A | 474 | 6.372  | -12.199 | 33.594 | 1.00 | 25.61 | C   |
| ATOM | 3731 | O   | THR | A | 474 | 5.565  | -12.398 | 32.675 | 1.00 | 27.28 | O   |
| ATOM | 3732 | CB  | THR | A | 474 | 8.647  | -13.169 | 33.829 | 1.00 | 27.15 | C   |
| ATOM | 3733 | CG2 | THR | A | 474 | 8.638  | -14.329 | 32.811 | 1.00 | 28.51 | C   |
| ATOM | 3734 | OG1 | THR | A | 474 | 9.997  | -12.748 | 34.084 | 1.00 | 29.10 | O   |
| ATOM | 3735 | N   | LYS | A | 475 | 6.000  | -12.011 | 34.856 | 1.00 | 26.00 | N   |
| ATOM | 3736 | CA  | LYS | A | 475 | 4.657  | -12.344 | 35.320 | 1.00 | 24.30 | C   |
| ATOM | 3737 | C   | LYS | A | 475 | 3.533  | -11.428 | 34.798 | 1.00 | 21.93 | C   |
| ATOM | 3738 | O   | LYS | A | 475 | 2.528  | -11.951 | 34.305 | 1.00 | 20.33 | O   |
| ATOM | 3739 | CB  | LYS | A | 475 | 4.636  | -12.427 | 36.858 | 1.00 | 25.66 | C   |
| ATOM | 3740 | CG  | LYS | A | 475 | 4.745  | -13.872 | 37.436 | 1.00 | 27.40 | C   |
| ATOM | 3741 | CD  | LYS | A | 475 | 6.131  | -14.541 | 37.206 | 1.00 | 29.53 | C   |
| ATOM | 3742 | CE  | LYS | A | 475 | 6.706  | -15.275 | 38.468 | 1.00 | 27.50 | C   |
| ATOM | 3743 | NZ  | LYS | A | 475 | 7.235  | -14.367 | 39.560 | 1.00 | 20.78 | N1+ |
| ATOM | 3744 | N   | CYS | A | 476 | 3.730  | -10.098 | 34.805 | 1.00 | 18.81 | N   |
| ATOM | 3745 | CA  | CYS | A | 476 | 2.672  | -9.129  | 34.411 | 1.00 | 14.74 | C   |
| ATOM | 3746 | C   | CYS | A | 476 | 2.446  | -9.020  | 32.891 | 1.00 | 14.14 | C   |
| ATOM | 3747 | O   | CYS | A | 476 | 1.340  | -8.728  | 32.413 | 1.00 | 10.01 | O   |
| ATOM | 3748 | CB  | CYS | A | 476 | 2.973  | -7.735  | 34.969 | 1.00 | 14.71 | C   |
| ATOM | 3749 | SG  | CYS | A | 476 | 2.665  | -7.476  | 36.756 | 1.00 | 17.94 | S   |
| ATOM | 3750 | N   | CYS | A | 477 | 3.502  | -9.291  | 32.135 | 1.00 | 14.05 | N   |
| ATOM | 3751 | CA  | CYS | A | 477 | 3.383  | -9.530  | 30.702 | 1.00 | 12.13 | C   |
| ATOM | 3752 | C   | CYS | A | 477 | 2.553  | -10.798 | 30.380 | 1.00 | 11.06 | C   |
| ATOM | 3753 | O   | CYS | A | 477 | 1.395  | -10.686 | 29.966 | 1.00 | 6.49  | O   |
| ATOM | 3754 | CB  | CYS | A | 477 | 4.794  | -9.588  | 30.090 | 1.00 | 13.42 | C   |
| ATOM | 3755 | SG  | CYS | A | 477 | 5.744  | -8.034  | 30.324 | 1.00 | 14.64 | S   |
| ATOM | 3756 | N   | THR | A | 478 | 3.070  | -11.969 | 30.755 | 1.00 | 11.58 | N   |
| ATOM | 3757 | CA  | THR | A | 478 | 2.425  | -13.263 | 30.481 | 1.00 | 14.89 | C   |
| ATOM | 3758 | C   | THR | A | 478 | 1.027  | -13.474 | 31.033 | 1.00 | 15.80 | C   |
| ATOM | 3759 | O   | THR | A | 478 | 0.194  | -14.100 | 30.369 | 1.00 | 16.44 | O   |
| ATOM | 3760 | CB  | THR | A | 478 | 3.241  | -14.447 | 31.035 | 1.00 | 18.24 | C   |
| ATOM | 3761 | CG2 | THR | A | 478 | 3.479  | -14.300 | 32.546 | 1.00 | 16.23 | C   |
| ATOM | 3762 | OG1 | THR | A | 478 | 2.514  | -15.661 | 30.807 | 1.00 | 19.21 | O   |
| ATOM | 3763 | N   | GLU | A | 479 | 0.903  | -13.261 | 32.343 | 1.00 | 15.82 | N   |
| ATOM | 3764 | CA  | GLU | A | 479 | -0.286 | -13.641 | 33.070 | 1.00 | 18.03 | C   |
| ATOM | 3765 | C   | GLU | A | 479 | -1.524 | -12.993 | 32.455 | 1.00 | 19.17 | C   |
| ATOM | 3766 | O   | GLU | A | 479 | -2.474 | -13.703 | 32.167 | 1.00 | 20.64 | O   |
| ATOM | 3767 | CB  | GLU | A | 479 | -0.144 | -13.319 | 34.572 | 1.00 | 20.48 | C   |
| ATOM | 3768 | CG  | GLU | A | 479 | 0.926  | -14.185 | 35.346 | 1.00 | 25.02 | C   |
| ATOM | 3769 | CD  | GLU | A | 479 | 0.428  | -15.556 | 35.910 | 1.00 | 26.36 | C   |
| ATOM | 3770 | OE1 | GLU | A | 479 | -0.438 | -15.569 | 36.819 | 1.00 | 27.61 | O   |
| ATOM | 3771 | OE2 | GLU | A | 479 | 1.014  | -16.614 | 35.558 | 1.00 | 23.89 | O1- |
| ATOM | 3772 | N   | SER | A | 480 | -1.476 | -11.697 | 32.129 | 1.00 | 21.19 | N   |
| ATOM | 3773 | CA  | SER | A | 480 | -2.479 | -11.102 | 31.229 | 1.00 | 23.00 | C   |
| ATOM | 3774 | C   | SER | A | 480 | -2.032 | -9.944  | 30.320 | 1.00 | 22.37 | C   |
| ATOM | 3775 | O   | SER | A | 480 | -1.343 | -9.022  | 30.768 | 1.00 | 23.67 | O   |
| ATOM | 3776 | CB  | SER | A | 480 | -3.703 | -10.633 | 32.019 | 1.00 | 25.73 | C   |
| ATOM | 3777 | OG  | SER | A | 480 | -4.717 | -10.096 | 31.159 | 1.00 | 24.90 | O   |
| ATOM | 3778 | N   | LEU | A | 481 | -2.642 | -9.900  | 29.133 | 1.00 | 18.32 | N   |
| ATOM | 3779 | CA  | LEU | A | 481 | -2.721 | -8.692  | 28.306 | 1.00 | 17.04 | C   |
| ATOM | 3780 | C   | LEU | A | 481 | -3.581 | -7.681  | 29.029 | 1.00 | 16.84 | C   |
| ATOM | 3781 | O   | LEU | A | 481 | -3.162 | -6.563  | 29.292 | 1.00 | 16.88 | O   |
| ATOM | 3782 | CB  | LEU | A | 481 | -3.392 | -8.992  | 26.950 | 1.00 | 12.89 | C   |
| ATOM | 3783 | CG  | LEU | A | 481 | -3.438 | -7.943  | 25.831 | 1.00 | 8.60  | C   |
| ATOM | 3784 | CD1 | LEU | A | 481 | -2.107 | -7.944  | 25.173 | 1.00 | 11.20 | C   |
| ATOM | 3785 | CD2 | LEU | A | 481 | -4.510 | -8.235  | 24.771 | 1.00 | 2.00  | C   |
| ATOM | 3786 | N   | VAL | A | 482 | -4.791 | -8.109  | 29.364 | 1.00 | 18.70 | N   |

|      |      |     |     |   |     |        |        |        |      |       |     |
|------|------|-----|-----|---|-----|--------|--------|--------|------|-------|-----|
| ATOM | 3787 | CA  | VAL | A | 482 | -5.873 | -7.205 | 29.741 | 1.00 | 17.38 | C   |
| ATOM | 3788 | C   | VAL | A | 482 | -5.656 | -6.631 | 31.146 | 1.00 | 15.41 | C   |
| ATOM | 3789 | O   | VAL | A | 482 | -6.034 | -5.490 | 31.420 | 1.00 | 12.39 | O   |
| ATOM | 3790 | CB  | VAL | A | 482 | -7.235 | -7.944 | 29.665 | 1.00 | 19.15 | C   |
| ATOM | 3791 | CG1 | VAL | A | 482 | -8.371 | -6.944 | 29.602 | 1.00 | 16.59 | C   |
| ATOM | 3792 | CG2 | VAL | A | 482 | -7.262 | -8.910 | 28.452 | 1.00 | 14.21 | C   |
| ATOM | 3793 | N   | ASN | A | 483 | -4.887 | -7.349 | 31.962 | 1.00 | 15.51 | N   |
| ATOM | 3794 | CA  | ASN | A | 483 | -4.543 | -6.871 | 33.313 | 1.00 | 19.45 | C   |
| ATOM | 3795 | C   | ASN | A | 483 | -3.117 | -6.282 | 33.448 | 1.00 | 18.86 | C   |
| ATOM | 3796 | O   | ASN | A | 483 | -2.541 | -6.286 | 34.527 | 1.00 | 18.09 | O   |
| ATOM | 3797 | CB  | ASN | A | 483 | -4.744 | -7.999 | 34.349 | 1.00 | 20.35 | C   |
| ATOM | 3798 | CG  | ASN | A | 483 | -6.101 | -8.689 | 34.212 | 1.00 | 23.29 | C   |
| ATOM | 3799 | ND2 | ASN | A | 483 | -7.134 | -8.065 | 34.770 | 1.00 | 23.14 | N   |
| ATOM | 3800 | OD1 | ASN | A | 483 | -6.232 | -9.728 | 33.544 | 1.00 | 20.79 | O   |
| ATOM | 3801 | N   | ARG | A | 484 | -2.627 | -5.632 | 32.400 | 1.00 | 19.94 | N   |
| ATOM | 3802 | CA  | ARG | A | 484 | -1.235 | -5.195 | 32.348 | 1.00 | 18.62 | C   |
| ATOM | 3803 | C   | ARG | A | 484 | -1.091 | -4.010 | 33.255 | 1.00 | 16.95 | C   |
| ATOM | 3804 | O   | ARG | A | 484 | -0.397 | -4.077 | 34.247 | 1.00 | 15.09 | O   |
| ATOM | 3805 | CB  | ARG | A | 484 | -0.844 | -4.773 | 30.920 | 1.00 | 22.74 | C   |
| ATOM | 3806 | CG  | ARG | A | 484 | 0.231  | -5.615 | 30.212 | 1.00 | 18.99 | C   |
| ATOM | 3807 | CD  | ARG | A | 484 | 0.209  | -5.384 | 28.687 | 1.00 | 16.43 | C   |
| ATOM | 3808 | NE  | ARG | A | 484 | 1.293  | -6.102 | 28.008 | 1.00 | 17.41 | N   |
| ATOM | 3809 | CZ  | ARG | A | 484 | 1.157  | -7.231 | 27.313 | 1.00 | 16.27 | C   |
| ATOM | 3810 | NH1 | ARG | A | 484 | -0.025 | -7.784 | 27.149 | 1.00 | 17.18 | N1+ |
| ATOM | 3811 | NH2 | ARG | A | 484 | 2.216  | -7.812 | 26.767 | 1.00 | 20.22 | N   |
| ATOM | 3812 | N   | ARG | A | 485 | -1.868 | -2.973 | 32.992 | 1.00 | 17.31 | N   |
| ATOM | 3813 | CA  | ARG | A | 485 | -1.641 | -1.679 | 33.626 | 1.00 | 19.94 | C   |
| ATOM | 3814 | C   | ARG | A | 485 | -2.259 | -1.408 | 35.051 | 1.00 | 22.79 | C   |
| ATOM | 3815 | O   | ARG | A | 485 | -1.991 | -0.351 | 35.670 | 1.00 | 22.25 | O   |
| ATOM | 3816 | CB  | ARG | A | 485 | -2.043 | -0.583 | 32.637 | 1.00 | 16.29 | C   |
| ATOM | 3817 | CG  | ARG | A | 485 | -1.603 | 0.799  | 33.039 | 1.00 | 16.70 | C   |
| ATOM | 3818 | CD  | ARG | A | 485 | -2.801 | 1.708  | 33.276 | 1.00 | 15.57 | C   |
| ATOM | 3819 | NE  | ARG | A | 485 | -3.930 | 1.020  | 33.887 | 1.00 | 12.17 | N   |
| ATOM | 3820 | CZ  | ARG | A | 485 | -4.215 | 1.091  | 35.173 | 1.00 | 11.81 | N   |
| ATOM | 3821 | NH1 | ARG | A | 485 | -3.411 | 1.751  | 35.978 | 1.00 | 15.13 | N1+ |
| ATOM | 3822 | NH2 | ARG | A | 485 | -5.192 | 0.371  | 35.680 | 1.00 | 12.58 | N   |
| ATOM | 3823 | N   | PRO | A | 486 | -3.067 | -2.350 | 35.598 | 1.00 | 22.59 | N   |
| ATOM | 3824 | CA  | PRO | A | 486 | -3.024 | -2.488 | 37.067 | 1.00 | 23.53 | C   |
| ATOM | 3825 | C   | PRO | A | 486 | -2.092 | -3.558 | 37.639 | 1.00 | 21.48 | C   |
| ATOM | 3826 | O   | PRO | A | 486 | -2.263 | -3.997 | 38.779 | 1.00 | 18.78 | O   |
| ATOM | 3827 | CB  | PRO | A | 486 | -4.489 | -2.756 | 37.448 | 1.00 | 23.69 | C   |
| ATOM | 3828 | CG  | PRO | A | 486 | -5.101 | -3.264 | 36.224 | 1.00 | 19.85 | C   |
| ATOM | 3829 | CD  | PRO | A | 486 | -4.446 | -2.530 | 35.110 | 1.00 | 22.51 | C   |
| ATOM | 3830 | N   | CYS | A | 487 | -1.118 | -3.982 | 36.846 | 1.00 | 19.53 | N   |
| ATOM | 3831 | CA  | CYS | A | 487 | -0.170 | -4.986 | 37.304 | 1.00 | 19.20 | C   |
| ATOM | 3832 | C   | CYS | A | 487 | 1.135  | -4.343 | 37.720 | 1.00 | 20.85 | C   |
| ATOM | 3833 | O   | CYS | A | 487 | 1.389  | -4.179 | 38.908 | 1.00 | 24.17 | O   |
| ATOM | 3834 | CB  | CYS | A | 487 | 0.102  | -6.004 | 36.223 | 1.00 | 15.12 | C   |
| ATOM | 3835 | SG  | CYS | A | 487 | 0.659  | -7.543 | 36.947 | 1.00 | 12.46 | S   |
| ATOM | 3836 | N   | PHE | A | 488 | 1.882  | -3.834 | 36.745 | 1.00 | 21.06 | N   |
| ATOM | 3837 | CA  | PHE | A | 488 | 3.057  | -3.030 | 37.018 | 1.00 | 16.19 | C   |
| ATOM | 3838 | C   | PHE | A | 488 | 2.761  | -2.078 | 38.133 | 1.00 | 16.14 | C   |
| ATOM | 3839 | O   | PHE | A | 488 | 3.334  | -2.231 | 39.193 | 1.00 | 16.21 | O   |
| ATOM | 3840 | CB  | PHE | A | 488 | 3.487  | -2.282 | 35.767 | 1.00 | 15.68 | C   |
| ATOM | 3841 | CG  | PHE | A | 488 | 4.434  | -3.072 | 34.917 | 1.00 | 18.17 | C   |
| ATOM | 3842 | CD1 | PHE | A | 488 | 3.953  | -4.049 | 34.066 | 1.00 | 14.32 | C   |
| ATOM | 3843 | CD2 | PHE | A | 488 | 5.800  | -3.027 | 35.173 | 1.00 | 15.88 | C   |
| ATOM | 3844 | CE1 | PHE | A | 488 | 4.799  | -4.961 | 33.530 | 1.00 | 13.05 | C   |
| ATOM | 3845 | CE2 | PHE | A | 488 | 6.638  | -3.937 | 34.632 | 1.00 | 7.89  | C   |
| ATOM | 3846 | CZ  | PHE | A | 488 | 6.142  | -4.907 | 33.821 | 1.00 | 11.30 | C   |
| ATOM | 3847 | N   | SER | A | 489 | 1.648  | -1.356 | 37.989 | 1.00 | 16.65 | N   |
| ATOM | 3848 | CA  | SER | A | 489 | 1.124  | -0.449 | 39.020 | 1.00 | 14.57 | C   |
| ATOM | 3849 | C   | SER | A | 489 | 1.020  | -1.124 | 40.400 | 1.00 | 14.49 | C   |
| ATOM | 3850 | O   | SER | A | 489 | 1.604  | -0.644 | 41.368 | 1.00 | 14.95 | O   |
| ATOM | 3851 | CB  | SER | A | 489 | -0.261 | 0.084  | 38.606 | 1.00 | 13.40 | C   |
| ATOM | 3852 | OG  | SER | A | 489 | -0.220 | 0.832  | 37.402 | 1.00 | 9.27  | O   |
| ATOM | 3853 | N   | ALA | A | 490 | 0.329  | -2.264 | 40.471 | 1.00 | 14.36 | N   |
| ATOM | 3854 | CA  | ALA | A | 490 | 0.018  | -2.922 | 41.746 | 1.00 | 14.42 | C   |
| ATOM | 3855 | C   | ALA | A | 490 | 1.174  | -3.786 | 42.177 | 1.00 | 15.92 | C   |
| ATOM | 3856 | O   | ALA | A | 490 | 1.016  | -4.996 | 42.395 | 1.00 | 16.03 | O   |
| ATOM | 3857 | CB  | ALA | A | 490 | -1.233 | -3.764 | 41.628 | 1.00 | 14.31 | C   |

|      |      |     |     |   |     |        |         |        |      |       |     |
|------|------|-----|-----|---|-----|--------|---------|--------|------|-------|-----|
| ATOM | 3858 | N   | LEU | A | 491 | 2.275  | -3.111  | 42.483 | 1.00 | 16.50 | N   |
| ATOM | 3859 | CA  | LEU | A | 491 | 3.582  | -3.730  | 42.630 | 1.00 | 17.68 | C   |
| ATOM | 3860 | C   | LEU | A | 491 | 4.264  | -2.722  | 43.515 | 1.00 | 18.16 | C   |
| ATOM | 3861 | O   | LEU | A | 491 | 4.181  | -1.532  | 43.235 | 1.00 | 19.45 | O   |
| ATOM | 3862 | CB  | LEU | A | 491 | 4.274  | -3.755  | 41.260 | 1.00 | 18.42 | C   |
| ATOM | 3863 | CG  | LEU | A | 491 | 5.176  | -4.844  | 40.673 | 1.00 | 19.23 | C   |
| ATOM | 3864 | CD1 | LEU | A | 491 | 4.410  | -6.103  | 40.303 | 1.00 | 19.20 | C   |
| ATOM | 3865 | CD2 | LEU | A | 491 | 5.816  | -4.257  | 39.436 | 1.00 | 21.21 | C   |
| ATOM | 3866 | N   | GLU | A | 492 | 4.742  | -3.138  | 44.677 | 1.00 | 17.64 | N   |
| ATOM | 3867 | CA  | GLU | A | 492 | 5.441  | -2.176  | 45.526 | 1.00 | 20.34 | C   |
| ATOM | 3868 | C   | GLU | A | 492 | 6.920  | -2.316  | 45.191 | 1.00 | 20.14 | C   |
| ATOM | 3869 | O   | GLU | A | 492 | 7.255  | -2.927  | 44.186 | 1.00 | 18.77 | O   |
| ATOM | 3870 | CB  | GLU | A | 492 | 5.143  | -2.414  | 47.033 | 1.00 | 20.09 | C   |
| ATOM | 3871 | CG  | GLU | A | 492 | 3.620  | -2.630  | 47.374 | 1.00 | 24.17 | C   |
| ATOM | 3872 | CD  | GLU | A | 492 | 2.836  | -1.411  | 47.983 | 1.00 | 25.80 | C   |
| ATOM | 3873 | OE1 | GLU | A | 492 | 3.305  | -0.784  | 48.959 | 1.00 | 27.22 | O   |
| ATOM | 3874 | OE2 | GLU | A | 492 | 1.648  | -1.216  | 47.614 | 1.00 | 24.48 | O1- |
| ATOM | 3875 | N   | VAL | A | 493 | 7.786  | -1.623  | 45.924 | 1.00 | 21.53 | N   |
| ATOM | 3876 | CA  | VAL | A | 493 | 9.231  | -1.795  | 45.779 | 1.00 | 20.93 | C   |
| ATOM | 3877 | C   | VAL | A | 493 | 9.635  | -3.247  | 46.044 | 1.00 | 22.35 | C   |
| ATOM | 3878 | O   | VAL | A | 493 | 9.525  | -3.722  | 47.170 | 1.00 | 24.31 | O   |
| ATOM | 3879 | CB  | VAL | A | 493 | 9.982  | -0.910  | 46.767 | 1.00 | 18.51 | C   |
| ATOM | 3880 | CG1 | VAL | A | 493 | 11.487 | -1.196  | 46.692 | 1.00 | 19.04 | C   |
| ATOM | 3881 | CG2 | VAL | A | 493 | 9.666  | 0.552   | 46.492 | 1.00 | 17.43 | C   |
| ATOM | 3882 | N   | ASP | A | 494 | 10.093 | -3.951  | 45.016 | 1.00 | 24.29 | N   |
| ATOM | 3883 | CA  | ASP | A | 494 | 10.404 | -5.382  | 45.148 | 1.00 | 25.27 | C   |
| ATOM | 3884 | C   | ASP | A | 494 | 11.691 | -5.486  | 45.946 | 1.00 | 23.84 | C   |
| ATOM | 3885 | O   | ASP | A | 494 | 12.763 | -5.666  | 45.375 | 1.00 | 22.03 | O   |
| ATOM | 3886 | CB  | ASP | A | 494 | 10.603 | -6.067  | 43.764 | 1.00 | 25.69 | C   |
| ATOM | 3887 | CG  | ASP | A | 494 | 9.375  | -5.952  | 42.826 | 1.00 | 21.60 | C   |
| ATOM | 3888 | OD1 | ASP | A | 494 | 8.405  | -5.219  | 43.111 | 1.00 | 20.70 | O   |
| ATOM | 3889 | OD2 | ASP | A | 494 | 9.391  | -6.593  | 41.768 | 1.00 | 16.55 | O1- |
| ATOM | 3890 | N   | GLU | A | 495 | 11.558 | -5.460  | 47.270 | 1.00 | 24.75 | N   |
| ATOM | 3891 | CA  | GLU | A | 495 | 12.703 | -5.461  | 48.188 | 1.00 | 25.22 | C   |
| ATOM | 3892 | C   | GLU | A | 495 | 13.578 | -6.701  | 48.020 | 1.00 | 25.09 | C   |
| ATOM | 3893 | O   | GLU | A | 495 | 14.671 | -6.793  | 48.586 | 1.00 | 23.87 | O   |
| ATOM | 3894 | CB  | GLU | A | 495 | 12.229 | -5.334  | 49.644 | 1.00 | 25.31 | C   |
| ATOM | 3895 | CG  | GLU | A | 495 | 11.358 | -4.089  | 49.951 | 1.00 | 22.81 | C   |
| ATOM | 3896 | CD  | GLU | A | 495 | 9.976  | -4.443  | 50.509 | 1.00 | 23.79 | C   |
| ATOM | 3897 | OE1 | GLU | A | 495 | 9.639  | -5.650  | 50.564 | 1.00 | 20.96 | O   |
| ATOM | 3898 | OE2 | GLU | A | 495 | 9.223  | -3.511  | 50.885 | 1.00 | 22.17 | O1- |
| ATOM | 3899 | N   | THR | A | 496 | 13.107 | -7.595  | 47.149 | 1.00 | 26.34 | N   |
| ATOM | 3900 | CA  | THR | A | 496 | 13.866 | -8.694  | 46.535 | 1.00 | 23.22 | C   |
| ATOM | 3901 | C   | THR | A | 496 | 15.335 | -8.416  | 46.231 | 1.00 | 22.62 | C   |
| ATOM | 3902 | O   | THR | A | 496 | 16.150 | -9.331  | 46.277 | 1.00 | 22.94 | O   |
| ATOM | 3903 | CB  | THR | A | 496 | 13.187 | -9.146  | 45.199 | 1.00 | 21.63 | C   |
| ATOM | 3904 | CG2 | THR | A | 496 | 12.732 | -10.581 | 45.296 | 1.00 | 21.18 | C   |
| ATOM | 3905 | OG1 | THR | A | 496 | 12.060 | -8.302  | 44.898 | 1.00 | 16.30 | O   |
| ATOM | 3906 | N   | TYR | A | 497 | 15.661 | -7.150  | 45.975 | 1.00 | 22.20 | N   |
| ATOM | 3907 | CA  | TYR | A | 497 | 16.844 | -6.768  | 45.215 | 1.00 | 23.14 | C   |
| ATOM | 3908 | C   | TYR | A | 497 | 18.148 | -7.505  | 45.559 | 1.00 | 25.54 | C   |
| ATOM | 3909 | O   | TYR | A | 497 | 18.420 | -8.588  | 45.015 | 1.00 | 24.48 | O   |
| ATOM | 3910 | CB  | TYR | A | 497 | 17.055 | -5.256  | 45.330 | 1.00 | 23.83 | C   |
| ATOM | 3911 | CG  | TYR | A | 497 | 17.784 | -4.607  | 44.155 | 1.00 | 25.67 | C   |
| ATOM | 3912 | CD1 | TYR | A | 497 | 17.903 | -5.248  | 42.939 | 1.00 | 26.17 | C   |
| ATOM | 3913 | CD2 | TYR | A | 497 | 18.419 | -3.381  | 44.302 | 1.00 | 24.70 | C   |
| ATOM | 3914 | CE1 | TYR | A | 497 | 18.656 | -4.699  | 41.917 | 1.00 | 27.56 | C   |
| ATOM | 3915 | CE2 | TYR | A | 497 | 19.163 | -2.831  | 43.293 | 1.00 | 24.84 | C   |
| ATOM | 3916 | CZ  | TYR | A | 497 | 19.298 | -3.496  | 42.103 | 1.00 | 27.12 | C   |
| ATOM | 3917 | OH  | TYR | A | 497 | 20.187 | -3.028  | 41.144 | 1.00 | 25.38 | O   |
| ATOM | 3918 | N   | VAL | A | 498 | 18.915 | -6.947  | 46.504 | 1.00 | 26.48 | N   |
| ATOM | 3919 | CA  | VAL | A | 498 | 20.386 | -7.050  | 46.515 | 1.00 | 25.76 | C   |
| ATOM | 3920 | C   | VAL | A | 498 | 20.815 | -6.909  | 45.059 | 1.00 | 27.52 | C   |
| ATOM | 3921 | O   | VAL | A | 498 | 20.314 | -6.011  | 44.377 | 1.00 | 26.89 | O   |
| ATOM | 3922 | CB  | VAL | A | 498 | 20.934 | -8.371  | 47.162 | 1.00 | 25.41 | C   |
| ATOM | 3923 | CG1 | VAL | A | 498 | 22.373 | -8.146  | 47.637 | 1.00 | 23.31 | C   |
| ATOM | 3924 | CG2 | VAL | A | 498 | 20.075 | -8.802  | 48.361 | 1.00 | 25.94 | C   |
| ATOM | 3925 | N   | PRO | A | 499 | 21.622 | -7.846  | 44.516 | 1.00 | 30.00 | N   |
| ATOM | 3926 | CA  | PRO | A | 499 | 22.892 | -7.469  | 43.868 | 1.00 | 29.18 | C   |
| ATOM | 3927 | C   | PRO | A | 499 | 23.366 | -6.065  | 44.192 | 1.00 | 29.84 | C   |
| ATOM | 3928 | O   | PRO | A | 499 | 24.553 | -5.856  | 44.419 | 1.00 | 32.19 | O   |



|      |      |     |     |   |     |        |        |        |      |       |     |
|------|------|-----|-----|---|-----|--------|--------|--------|------|-------|-----|
| ATOM | 3929 | CB  | PRO | A | 499 | 22.589 | -7.640 | 42.383 | 1.00 | 29.25 | C   |
| ATOM | 3930 | CG  | PRO | A | 499 | 21.521 | -8.787 | 42.353 | 1.00 | 31.67 | C   |
| ATOM | 3931 | CD  | PRO | A | 499 | 21.046 | -9.013 | 43.821 | 1.00 | 29.92 | C   |
| ATOM | 3932 | N   | LYS | A | 500 | 22.480 | -5.092 | 44.014 | 1.00 | 29.43 | N   |
| ATOM | 3933 | CA  | LYS | A | 500 | 22.604 | -3.779 | 44.641 | 1.00 | 28.77 | C   |
| ATOM | 3934 | C   | LYS | A | 500 | 23.964 | -3.178 | 44.341 | 1.00 | 29.16 | C   |
| ATOM | 3935 | O   | LYS | A | 500 | 24.597 | -2.585 | 45.213 | 1.00 | 31.34 | O   |
| ATOM | 3936 | CB  | LYS | A | 500 | 22.376 | -3.880 | 46.153 | 1.00 | 25.37 | C   |
| ATOM | 3937 | CG  | LYS | A | 500 | 21.848 | -2.597 | 46.770 | 1.00 | 23.83 | C   |
| ATOM | 3938 | CD  | LYS | A | 500 | 21.013 | -2.876 | 48.001 | 1.00 | 24.99 | C   |
| ATOM | 3939 | CE  | LYS | A | 500 | 19.991 | -3.991 | 47.712 | 1.00 | 29.69 | C   |
| ATOM | 3940 | NZ  | LYS | A | 500 | 18.606 | -3.820 | 48.316 | 1.00 | 30.96 | N1+ |
| ATOM | 3941 | N   | GLU | A | 501 | 24.456 | -3.494 | 43.144 | 1.00 | 28.36 | N   |
| ATOM | 3942 | CA  | GLU | A | 501 | 25.733 | -3.020 | 42.626 | 1.00 | 27.10 | C   |
| ATOM | 3943 | C   | GLU | A | 501 | 26.219 | -1.775 | 43.365 | 1.00 | 23.87 | C   |
| ATOM | 3944 | O   | GLU | A | 501 | 25.440 | -0.854 | 43.611 | 1.00 | 24.20 | O   |
| ATOM | 3945 | CB  | GLU | A | 501 | 25.583 | -2.722 | 41.120 | 1.00 | 28.81 | C   |
| ATOM | 3946 | CG  | GLU | A | 501 | 26.853 | -2.919 | 40.279 | 1.00 | 27.95 | C   |
| ATOM | 3947 | CD  | GLU | A | 501 | 26.979 | -4.325 | 39.717 | 1.00 | 26.77 | C   |
| ATOM | 3948 | OE1 | GLU | A | 501 | 25.944 | -4.926 | 39.354 | 1.00 | 26.88 | O   |
| ATOM | 3949 | OE2 | GLU | A | 501 | 28.114 | -4.842 | 39.661 | 1.00 | 27.69 | O1- |
| ATOM | 3950 | N   | PHE | A | 502 | 27.466 | -1.790 | 43.799 | 1.00 | 19.52 | N   |
| ATOM | 3951 | CA  | PHE | A | 502 | 28.068 | -0.583 | 44.320 | 1.00 | 21.84 | C   |
| ATOM | 3952 | C   | PHE | A | 502 | 29.008 | 0.086  | 43.277 | 1.00 | 22.82 | C   |
| ATOM | 3953 | O   | PHE | A | 502 | 29.712 | -0.598 | 42.551 | 1.00 | 24.52 | O   |
| ATOM | 3954 | CB  | PHE | A | 502 | 28.827 | -0.921 | 45.617 | 1.00 | 22.57 | C   |
| ATOM | 3955 | CG  | PHE | A | 502 | 28.007 | -0.747 | 46.897 | 1.00 | 24.13 | C   |
| ATOM | 3956 | CD1 | PHE | A | 502 | 26.662 | -0.372 | 46.856 | 1.00 | 20.81 | C   |
| ATOM | 3957 | CD2 | PHE | A | 502 | 28.627 | -0.839 | 48.149 | 1.00 | 22.46 | C   |
| ATOM | 3958 | CE1 | PHE | A | 502 | 25.976 | -0.085 | 48.030 | 1.00 | 19.06 | C   |
| ATOM | 3959 | CE2 | PHE | A | 502 | 27.937 | -0.544 | 49.329 | 1.00 | 18.64 | C   |
| ATOM | 3960 | CZ  | PHE | A | 502 | 26.621 | -0.165 | 49.266 | 1.00 | 19.92 | C   |
| ATOM | 3961 | N   | ASN | A | 503 | 28.876 | 1.392  | 43.069 | 1.00 | 22.88 | N   |
| ATOM | 3962 | CA  | ASN | A | 503 | 30.017 | 2.214  | 42.668 | 1.00 | 24.10 | C   |
| ATOM | 3963 | C   | ASN | A | 503 | 30.509 | 2.157  | 41.188 | 1.00 | 25.87 | C   |
| ATOM | 3964 | O   | ASN | A | 503 | 31.690 | 2.401  | 40.905 | 1.00 | 24.39 | O   |
| ATOM | 3965 | CB  | ASN | A | 503 | 31.167 | 1.906  | 43.630 | 1.00 | 24.77 | C   |
| ATOM | 3966 | CG  | ASN | A | 503 | 30.765 | 2.064  | 45.094 | 1.00 | 25.30 | C   |
| ATOM | 3967 | ND2 | ASN | A | 503 | 31.270 | 1.181  | 45.961 | 1.00 | 25.44 | N   |
| ATOM | 3968 | OD1 | ASN | A | 503 | 30.024 | 2.978  | 45.442 | 1.00 | 26.75 | O   |
| ATOM | 3969 | N   | ALA | A | 504 | 29.564 | 2.196  | 40.254 | 1.00 | 28.88 | N   |
| ATOM | 3970 | CA  | ALA | A | 504 | 29.804 | 1.734  | 38.874 | 1.00 | 31.13 | C   |
| ATOM | 3971 | C   | ALA | A | 504 | 30.300 | 2.776  | 37.823 | 1.00 | 31.37 | C   |
| ATOM | 3972 | O   | ALA | A | 504 | 29.549 | 3.108  | 36.885 | 1.00 | 29.77 | O   |
| ATOM | 3973 | CB  | ALA | A | 504 | 28.522 | 1.003  | 38.351 | 1.00 | 29.20 | C   |
| ATOM | 3974 | N   | GLU | A | 505 | 31.615 | 3.064  | 37.847 | 1.00 | 31.12 | N   |
| ATOM | 3975 | CA  | GLU | A | 505 | 32.305 | 4.005  | 36.923 | 1.00 | 30.29 | C   |
| ATOM | 3976 | C   | GLU | A | 505 | 32.672 | 3.490  | 35.500 | 1.00 | 30.54 | C   |
| ATOM | 3977 | O   | GLU | A | 505 | 33.795 | 3.603  | 35.040 | 1.00 | 30.90 | O   |
| ATOM | 3978 | CB  | GLU | A | 505 | 33.555 | 4.579  | 37.623 | 1.00 | 29.84 | C   |
| ATOM | 3979 | CG  | GLU | A | 505 | 34.522 | 5.484  | 36.794 | 1.00 | 30.64 | C   |
| ATOM | 3980 | CD  | GLU | A | 505 | 33.845 | 6.636  | 36.067 | 1.00 | 30.76 | C   |
| ATOM | 3981 | OE1 | GLU | A | 505 | 32.604 | 6.713  | 36.126 | 1.00 | 33.58 | O   |
| ATOM | 3982 | OE2 | GLU | A | 505 | 34.546 | 7.445  | 35.405 | 1.00 | 27.70 | O1- |
| ATOM | 3983 | N   | THR | A | 506 | 31.770 | 2.737  | 34.900 | 1.00 | 32.72 | N   |
| ATOM | 3984 | CA  | THR | A | 506 | 31.498 | 2.842  | 33.477 | 1.00 | 30.71 | C   |
| ATOM | 3985 | C   | THR | A | 506 | 30.144 | 3.518  | 33.584 | 1.00 | 30.02 | C   |
| ATOM | 3986 | O   | THR | A | 506 | 29.098 | 2.881  | 33.485 | 1.00 | 30.52 | O   |
| ATOM | 3987 | CB  | THR | A | 506 | 31.347 | 1.480  | 32.857 | 1.00 | 31.87 | C   |
| ATOM | 3988 | CG2 | THR | A | 506 | 30.724 | 1.603  | 31.495 | 1.00 | 32.08 | C   |
| ATOM | 3989 | OG1 | THR | A | 506 | 32.644 | 0.859  | 32.776 | 1.00 | 33.97 | O   |
| ATOM | 3990 | N   | PHE | A | 507 | 30.249 | 4.657  | 34.251 | 1.00 | 28.98 | N   |
| ATOM | 3991 | CA  | PHE | A | 507 | 29.169 | 5.342  | 34.917 | 1.00 | 26.92 | C   |
| ATOM | 3992 | C   | PHE | A | 507 | 29.075 | 6.625  | 34.106 | 1.00 | 25.90 | C   |
| ATOM | 3993 | O   | PHE | A | 507 | 28.730 | 6.586  | 32.917 | 1.00 | 22.64 | O   |
| ATOM | 3994 | CB  | PHE | A | 507 | 29.648 | 5.661  | 36.330 | 1.00 | 27.01 | C   |
| ATOM | 3995 | CG  | PHE | A | 507 | 28.600 | 6.192  | 37.248 | 1.00 | 28.40 | C   |
| ATOM | 3996 | CD1 | PHE | A | 507 | 27.527 | 6.923  | 36.778 | 1.00 | 26.26 | C   |
| ATOM | 3997 | CD2 | PHE | A | 507 | 28.789 | 6.093  | 38.622 | 1.00 | 28.34 | C   |
| ATOM | 3998 | CE1 | PHE | A | 507 | 26.673 | 7.551  | 37.666 | 1.00 | 28.02 | C   |
| ATOM | 3999 | CE2 | PHE | A | 507 | 27.934 | 6.718  | 39.511 | 1.00 | 26.64 | C   |

|      |      |     |     |   |     |        |        |        |      |       |     |
|------|------|-----|-----|---|-----|--------|--------|--------|------|-------|-----|
| ATOM | 4000 | CZ  | PHE | A | 507 | 26.882 | 7.446  | 39.035 | 1.00 | 26.34 | C   |
| ATOM | 4001 | N   | THR | A | 508 | 29.795 | 7.615  | 34.624 | 1.00 | 23.79 | N   |
| ATOM | 4002 | CA  | THR | A | 508 | 29.605 | 9.007  | 34.270 | 1.00 | 25.58 | C   |
| ATOM | 4003 | C   | THR | A | 508 | 30.579 | 9.372  | 33.153 | 1.00 | 24.27 | C   |
| ATOM | 4004 | O   | THR | A | 508 | 31.651 | 9.945  | 33.379 | 1.00 | 19.34 | O   |
| ATOM | 4005 | CB  | THR | A | 508 | 29.824 | 9.898  | 35.522 | 1.00 | 27.81 | C   |
| ATOM | 4006 | CG2 | THR | A | 508 | 29.006 | 11.184 | 35.427 | 1.00 | 27.64 | C   |
| ATOM | 4007 | OG1 | THR | A | 508 | 29.411 | 9.172  | 36.692 | 1.00 | 27.38 | O   |
| ATOM | 4008 | N   | PHE | A | 509 | 30.175 | 9.076  | 31.927 | 1.00 | 26.09 | N   |
| ATOM | 4009 | CA  | PHE | A | 509 | 31.089 | 9.209  | 30.800 | 1.00 | 29.27 | C   |
| ATOM | 4010 | C   | PHE | A | 509 | 31.562 | 10.649 | 30.558 | 1.00 | 29.37 | C   |
| ATOM | 4011 | O   | PHE | A | 509 | 32.470 | 10.857 | 29.742 | 1.00 | 29.22 | O   |
| ATOM | 4012 | CB  | PHE | A | 509 | 30.475 | 8.578  | 29.519 | 1.00 | 28.61 | C   |
| ATOM | 4013 | CG  | PHE | A | 509 | 29.409 | 9.410  | 28.848 | 1.00 | 30.39 | C   |
| ATOM | 4014 | CD1 | PHE | A | 509 | 29.751 | 10.520 | 28.076 | 1.00 | 31.31 | C   |
| ATOM | 4015 | CD2 | PHE | A | 509 | 28.107 | 8.935  | 28.764 | 1.00 | 31.82 | C   |
| ATOM | 4016 | CE1 | PHE | A | 509 | 28.831 | 11.131 | 27.223 | 1.00 | 29.90 | C   |
| ATOM | 4017 | CE2 | PHE | A | 509 | 27.170 | 9.543  | 27.906 | 1.00 | 31.41 | C   |
| ATOM | 4018 | CZ  | PHE | A | 509 | 27.541 | 10.639 | 27.136 | 1.00 | 31.04 | C   |
| ATOM | 4019 | N   | HIS | A | 510 | 31.160 | 11.554 | 31.466 | 1.00 | 28.52 | N   |
| ATOM | 4020 | CA  | HIS | A | 510 | 31.106 | 13.001 | 31.228 | 1.00 | 26.73 | C   |
| ATOM | 4021 | C   | HIS | A | 510 | 31.430 | 13.363 | 29.766 | 1.00 | 27.36 | C   |
| ATOM | 4022 | O   | HIS | A | 510 | 30.619 | 13.094 | 28.892 | 1.00 | 27.39 | O   |
| ATOM | 4023 | CB  | HIS | A | 510 | 32.021 | 13.738 | 32.212 | 1.00 | 24.61 | C   |
| ATOM | 4024 | CG  | HIS | A | 510 | 32.016 | 15.224 | 32.042 | 1.00 | 23.20 | C   |
| ATOM | 4025 | CD2 | HIS | A | 510 | 31.108 | 16.156 | 32.409 | 1.00 | 19.13 | C   |
| ATOM | 4026 | ND1 | HIS | A | 510 | 32.998 | 15.900 | 31.348 | 1.00 | 23.83 | N   |
| ATOM | 4027 | CE1 | HIS | A | 510 | 32.685 | 17.177 | 31.279 | 1.00 | 20.37 | C   |
| ATOM | 4028 | NE2 | HIS | A | 510 | 31.546 | 17.360 | 31.923 | 1.00 | 18.67 | N   |
| ATOM | 4029 | N   | ALA | A | 511 | 32.650 | 13.831 | 29.490 | 1.00 | 26.47 | N   |
| ATOM | 4030 | CA  | ALA | A | 511 | 33.110 | 14.040 | 28.119 | 1.00 | 26.06 | C   |
| ATOM | 4031 | C   | ALA | A | 511 | 32.517 | 15.279 | 27.427 | 1.00 | 28.02 | C   |
| ATOM | 4032 | O   | ALA | A | 511 | 32.011 | 15.182 | 26.314 | 1.00 | 30.20 | O   |
| ATOM | 4033 | CB  | ALA | A | 511 | 32.831 | 12.774 | 27.276 | 1.00 | 22.01 | C   |
| ATOM | 4034 | N   | ASP | A | 512 | 32.665 | 16.458 | 28.031 | 1.00 | 27.66 | N   |
| ATOM | 4035 | CA  | ASP | A | 512 | 31.940 | 17.650 | 27.558 | 1.00 | 26.35 | C   |
| ATOM | 4036 | C   | ASP | A | 512 | 30.605 | 17.315 | 26.859 | 1.00 | 25.46 | C   |
| ATOM | 4037 | O   | ASP | A | 512 | 30.404 | 17.662 | 25.687 | 1.00 | 22.46 | O   |
| ATOM | 4038 | CB  | ASP | A | 512 | 32.822 | 18.475 | 26.622 | 1.00 | 28.10 | C   |
| ATOM | 4039 | CG  | ASP | A | 512 | 32.789 | 19.984 | 26.933 | 1.00 | 30.49 | C   |
| ATOM | 4040 | OD1 | ASP | A | 512 | 32.547 | 20.373 | 28.103 | 1.00 | 27.50 | O   |
| ATOM | 4041 | OD2 | ASP | A | 512 | 33.113 | 20.783 | 26.011 | 1.00 | 31.67 | O1- |
| ATOM | 4042 | N   | ILE | A | 513 | 29.781 | 16.505 | 27.545 | 1.00 | 24.03 | N   |
| ATOM | 4043 | CA  | ILE | A | 513 | 28.389 | 16.258 | 27.174 | 1.00 | 18.35 | C   |
| ATOM | 4044 | C   | ILE | A | 513 | 27.730 | 17.571 | 26.913 | 1.00 | 19.35 | C   |
| ATOM | 4045 | O   | ILE | A | 513 | 26.907 | 17.671 | 26.015 | 1.00 | 19.34 | O   |
| ATOM | 4046 | CB  | ILE | A | 513 | 27.557 | 15.616 | 28.278 | 1.00 | 16.43 | C   |
| ATOM | 4047 | CG1 | ILE | A | 513 | 28.316 | 14.488 | 28.959 | 1.00 | 16.18 | C   |
| ATOM | 4048 | CG2 | ILE | A | 513 | 26.270 | 15.102 | 27.670 | 1.00 | 18.39 | C   |
| ATOM | 4049 | CD1 | ILE | A | 513 | 27.473 | 13.550 | 29.809 | 1.00 | 14.73 | C   |
| ATOM | 4050 | N   | CYS | A | 514 | 27.917 | 18.494 | 27.857 | 1.00 | 19.00 | N   |
| ATOM | 4051 | CA  | CYS | A | 514 | 27.567 | 19.896 | 27.650 | 1.00 | 20.07 | C   |
| ATOM | 4052 | C   | CYS | A | 514 | 28.126 | 20.289 | 26.300 | 1.00 | 22.50 | C   |
| ATOM | 4053 | O   | CYS | A | 514 | 29.334 | 20.276 | 26.095 | 1.00 | 23.48 | O   |
| ATOM | 4054 | CB  | CYS | A | 514 | 28.217 | 20.768 | 28.708 | 1.00 | 17.67 | C   |
| ATOM | 4055 | SG  | CYS | A | 514 | 30.001 | 20.505 | 28.723 | 1.00 | 18.01 | S   |
| ATOM | 4056 | N   | THR | A | 515 | 27.228 | 20.406 | 25.335 | 1.00 | 25.46 | N   |
| ATOM | 4057 | CA  | THR | A | 515 | 27.580 | 20.748 | 23.970 | 1.00 | 26.86 | C   |
| ATOM | 4058 | C   | THR | A | 515 | 28.699 | 19.896 | 23.361 | 1.00 | 26.41 | C   |
| ATOM | 4059 | O   | THR | A | 515 | 29.493 | 20.391 | 22.563 | 1.00 | 28.04 | O   |
| ATOM | 4060 | CB  | THR | A | 515 | 27.885 | 22.263 | 23.827 | 1.00 | 28.89 | C   |
| ATOM | 4061 | CG2 | THR | A | 515 | 26.576 | 23.040 | 23.525 | 1.00 | 29.83 | C   |
| ATOM | 4062 | OG1 | THR | A | 515 | 28.464 | 22.767 | 25.042 | 1.00 | 32.17 | O   |
| ATOM | 4063 | N   | LEU | A | 516 | 28.791 | 18.639 | 23.804 | 1.00 | 22.97 | N   |
| ATOM | 4064 | CA  | LEU | A | 516 | 28.855 | 17.500 | 22.881 | 1.00 | 20.76 | C   |
| ATOM | 4065 | C   | LEU | A | 516 | 27.510 | 17.536 | 22.152 | 1.00 | 20.35 | C   |
| ATOM | 4066 | O   | LEU | A | 516 | 27.427 | 17.980 | 21.001 | 1.00 | 19.65 | O   |
| ATOM | 4067 | CB  | LEU | A | 516 | 28.905 | 16.167 | 23.656 | 1.00 | 18.70 | C   |
| ATOM | 4068 | CG  | LEU | A | 516 | 30.129 | 15.387 | 24.146 | 1.00 | 11.26 | C   |
| ATOM | 4069 | CD1 | LEU | A | 516 | 29.858 | 13.895 | 24.061 | 1.00 | 11.26 | C   |
| ATOM | 4070 | CD2 | LEU | A | 516 | 31.309 | 15.729 | 23.330 | 1.00 | 14.12 | C   |

|      |      |     |     |   |     |        |        |        |      |       |     |
|------|------|-----|-----|---|-----|--------|--------|--------|------|-------|-----|
| ATOM | 4071 | N   | SER | A | 517 | 26.489 | 17.504 | 23.015 | 1.00 | 21.27 | N   |
| ATOM | 4072 | CA  | SER | A | 517 | 25.113 | 17.099 | 22.728 | 1.00 | 18.57 | C   |
| ATOM | 4073 | C   | SER | A | 517 | 24.157 | 18.259 | 22.953 | 1.00 | 17.16 | C   |
| ATOM | 4074 | O   | SER | A | 517 | 24.307 | 18.999 | 23.915 | 1.00 | 14.00 | O   |
| ATOM | 4075 | CB  | SER | A | 517 | 24.713 | 15.963 | 23.680 | 1.00 | 20.93 | C   |
| ATOM | 4076 | OG  | SER | A | 517 | 24.982 | 16.296 | 25.045 | 1.00 | 16.97 | O   |
| ATOM | 4077 | N   | GLU | A | 518 | 23.085 | 18.293 | 22.169 | 1.00 | 18.23 | N   |
| ATOM | 4078 | CA  | GLU | A | 518 | 22.162 | 19.418 | 22.155 | 1.00 | 19.60 | C   |
| ATOM | 4079 | C   | GLU | A | 518 | 20.713 | 18.940 | 22.104 | 1.00 | 19.98 | C   |
| ATOM | 4080 | O   | GLU | A | 518 | 20.437 | 17.817 | 21.692 | 1.00 | 18.87 | O   |
| ATOM | 4081 | CB  | GLU | A | 518 | 22.443 | 20.318 | 20.947 | 1.00 | 22.90 | C   |
| ATOM | 4082 | CG  | GLU | A | 518 | 23.891 | 20.813 | 20.811 | 1.00 | 25.02 | C   |
| ATOM | 4083 | CD  | GLU | A | 518 | 23.986 | 22.237 | 20.281 | 1.00 | 22.60 | C   |
| ATOM | 4084 | OE1 | GLU | A | 518 | 23.615 | 22.475 | 19.110 | 1.00 | 20.70 | O   |
| ATOM | 4085 | OE2 | GLU | A | 518 | 24.388 | 23.126 | 21.061 | 1.00 | 23.36 | O1- |
| ATOM | 4086 | N   | LYS | A | 519 | 19.797 | 19.884 | 22.314 | 1.00 | 23.54 | N   |
| ATOM | 4087 | CA  | LYS | A | 519 | 18.371 | 19.614 | 22.551 | 1.00 | 24.75 | C   |
| ATOM | 4088 | C   | LYS | A | 519 | 18.200 | 18.755 | 23.804 | 1.00 | 27.97 | C   |
| ATOM | 4089 | O   | LYS | A | 519 | 18.733 | 17.638 | 23.900 | 1.00 | 28.69 | O   |
| ATOM | 4090 | CB  | LYS | A | 519 | 17.732 | 18.927 | 21.346 | 1.00 | 21.56 | C   |
| ATOM | 4091 | CG  | LYS | A | 519 | 16.276 | 18.526 | 21.524 | 1.00 | 16.97 | C   |
| ATOM | 4092 | CD  | LYS | A | 519 | 15.692 | 18.116 | 20.174 | 1.00 | 17.59 | C   |
| ATOM | 4093 | CE  | LYS | A | 519 | 14.341 | 17.430 | 20.287 | 1.00 | 18.48 | C   |
| ATOM | 4094 | NZ  | LYS | A | 519 | 13.728 | 17.036 | 18.962 | 1.00 | 18.54 | N1+ |
| ATOM | 4095 | N   | GLU | A | 520 | 17.552 | 19.324 | 24.817 | 1.00 | 28.25 | N   |
| ATOM | 4096 | CA  | GLU | A | 520 | 17.420 | 18.641 | 26.099 | 1.00 | 27.40 | C   |
| ATOM | 4097 | C   | GLU | A | 520 | 16.947 | 17.204 | 25.945 | 1.00 | 29.51 | C   |
| ATOM | 4098 | O   | GLU | A | 520 | 17.010 | 16.423 | 26.886 | 1.00 | 31.44 | O   |
| ATOM | 4099 | CB  | GLU | A | 520 | 16.459 | 19.417 | 26.980 | 1.00 | 22.39 | C   |
| ATOM | 4100 | CG  | GLU | A | 520 | 16.902 | 20.824 | 27.137 | 1.00 | 17.69 | C   |
| ATOM | 4101 | CD  | GLU | A | 520 | 18.391 | 20.924 | 27.333 | 1.00 | 16.28 | C   |
| ATOM | 4102 | OE1 | GLU | A | 520 | 18.877 | 20.613 | 28.429 | 1.00 | 17.87 | O   |
| ATOM | 4103 | OE2 | GLU | A | 520 | 19.084 | 21.272 | 26.372 | 1.00 | 17.14 | O1- |
| ATOM | 4104 | N   | ARG | A | 521 | 16.406 | 16.883 | 24.775 | 1.00 | 32.04 | N   |
| ATOM | 4105 | CA  | ARG | A | 521 | 16.024 | 15.522 | 24.475 | 1.00 | 33.58 | C   |
| ATOM | 4106 | C   | ARG | A | 521 | 17.287 | 14.687 | 24.495 | 1.00 | 33.32 | C   |
| ATOM | 4107 | O   | ARG | A | 521 | 17.341 | 13.664 | 25.185 | 1.00 | 35.16 | O   |
| ATOM | 4108 | CB  | ARG | A | 521 | 15.298 | 15.456 | 23.131 | 1.00 | 34.23 | C   |
| ATOM | 4109 | CG  | ARG | A | 521 | 13.950 | 16.232 | 23.131 | 1.00 | 35.49 | C   |
| ATOM | 4110 | CD  | ARG | A | 521 | 12.801 | 15.429 | 23.747 | 1.00 | 38.31 | C   |
| ATOM | 4111 | NE  | ARG | A | 521 | 12.787 | 14.036 | 23.296 | 1.00 | 39.41 | N   |
| ATOM | 4112 | CZ  | ARG | A | 521 | 12.362 | 13.650 | 22.094 | 1.00 | 40.68 | C   |
| ATOM | 4113 | NH1 | ARG | A | 521 | 11.733 | 14.513 | 21.308 | 1.00 | 43.68 | N1+ |
| ATOM | 4114 | NH2 | ARG | A | 521 | 12.479 | 12.384 | 21.712 | 1.00 | 40.15 | N   |
| ATOM | 4115 | N   | GLN | A | 522 | 18.369 | 15.302 | 24.032 | 1.00 | 30.52 | N   |
| ATOM | 4116 | CA  | GLN | A | 522 | 19.687 | 14.689 | 24.103 | 1.00 | 25.95 | C   |
| ATOM | 4117 | C   | GLN | A | 522 | 20.450 | 15.095 | 25.345 | 1.00 | 20.74 | C   |
| ATOM | 4118 | O   | GLN | A | 522 | 21.400 | 14.411 | 25.727 | 1.00 | 15.80 | O   |
| ATOM | 4119 | CB  | GLN | A | 522 | 20.515 | 15.047 | 22.867 | 1.00 | 26.11 | C   |
| ATOM | 4120 | CG  | GLN | A | 522 | 19.902 | 14.640 | 21.555 | 1.00 | 26.14 | C   |
| ATOM | 4121 | CD  | GLN | A | 522 | 20.623 | 15.273 | 20.397 | 1.00 | 28.67 | C   |
| ATOM | 4122 | NE2 | GLN | A | 522 | 19.963 | 15.346 | 19.241 | 1.00 | 26.87 | N   |
| ATOM | 4123 | OE1 | GLN | A | 522 | 21.777 | 15.681 | 20.533 | 1.00 | 27.66 | O   |
| ATOM | 4124 | N   | ILE | A | 523 | 20.145 | 16.264 | 25.897 | 1.00 | 18.75 | N   |
| ATOM | 4125 | CA  | ILE | A | 523 | 20.906 | 16.687 | 27.069 | 1.00 | 19.51 | C   |
| ATOM | 4126 | C   | ILE | A | 523 | 20.389 | 15.978 | 28.312 | 1.00 | 19.06 | C   |
| ATOM | 4127 | O   | ILE | A | 523 | 21.156 | 15.338 | 29.050 | 1.00 | 19.63 | O   |
| ATOM | 4128 | CB  | ILE | A | 523 | 20.862 | 18.206 | 27.321 | 1.00 | 17.88 | C   |
| ATOM | 4129 | CG1 | ILE | A | 523 | 20.994 | 18.975 | 26.004 | 1.00 | 21.59 | C   |
| ATOM | 4130 | CG2 | ILE | A | 523 | 21.993 | 18.578 | 28.263 | 1.00 | 18.05 | C   |
| ATOM | 4131 | CD1 | ILE | A | 523 | 21.840 | 20.265 | 26.080 | 1.00 | 21.79 | C   |
| ATOM | 4132 | N   | LYS | A | 524 | 19.076 | 16.059 | 28.512 | 1.00 | 16.03 | N   |
| ATOM | 4133 | CA  | LYS | A | 524 | 18.464 | 15.493 | 29.680 | 1.00 | 12.94 | C   |
| ATOM | 4134 | C   | LYS | A | 524 | 18.691 | 13.989 | 29.649 | 1.00 | 13.61 | C   |
| ATOM | 4135 | O   | LYS | A | 524 | 19.531 | 13.510 | 30.385 | 1.00 | 13.89 | O   |
| ATOM | 4136 | CB  | LYS | A | 524 | 16.986 | 15.858 | 29.752 | 1.00 | 10.56 | C   |
| ATOM | 4137 | CG  | LYS | A | 524 | 16.375 | 15.511 | 31.100 | 1.00 | 15.61 | C   |
| ATOM | 4138 | CD  | LYS | A | 524 | 15.266 | 16.457 | 31.565 | 1.00 | 13.48 | C   |
| ATOM | 4139 | CE  | LYS | A | 524 | 14.946 | 16.213 | 33.033 | 1.00 | 11.44 | C   |
| ATOM | 4140 | NZ  | LYS | A | 524 | 16.147 | 16.413 | 33.888 | 1.00 | 5.17  | N1+ |
| ATOM | 4141 | N   | LYS | A | 525 | 18.184 | 13.312 | 28.625 | 1.00 | 14.90 | N   |

|      |      |     |     |   |     |        |        |        |      |       |     |
|------|------|-----|-----|---|-----|--------|--------|--------|------|-------|-----|
| ATOM | 4142 | CA  | LYS | A | 525 | 18.299 | 11.851 | 28.506 | 1.00 | 16.22 | C   |
| ATOM | 4143 | C   | LYS | A | 525 | 19.550 | 11.230 | 29.180 | 1.00 | 17.48 | C   |
| ATOM | 4144 | O   | LYS | A | 525 | 19.457 | 10.186 | 29.837 | 1.00 | 16.17 | O   |
| ATOM | 4145 | CB  | LYS | A | 525 | 18.212 | 11.450 | 27.014 | 1.00 | 13.21 | C   |
| ATOM | 4146 | CG  | LYS | A | 525 | 18.854 | 10.133 | 26.631 | 1.00 | 10.66 | C   |
| ATOM | 4147 | CD  | LYS | A | 525 | 20.084 | 10.378 | 25.775 | 1.00 | 15.61 | C   |
| ATOM | 4148 | CE  | LYS | A | 525 | 20.840 | 9.078  | 25.401 | 1.00 | 17.64 | C   |
| ATOM | 4149 | NZ  | LYS | A | 525 | 21.001 | 8.890  | 23.909 | 1.00 | 14.96 | N1+ |
| ATOM | 4150 | N   | GLN | A | 526 | 20.707 | 11.881 | 29.040 | 1.00 | 18.82 | N   |
| ATOM | 4151 | CA  | GLN | A | 526 | 21.912 | 11.429 | 29.719 | 1.00 | 18.67 | C   |
| ATOM | 4152 | C   | GLN | A | 526 | 21.750 | 11.834 | 31.156 | 1.00 | 20.95 | C   |
| ATOM | 4153 | O   | GLN | A | 526 | 21.540 | 10.964 | 32.010 | 1.00 | 21.14 | O   |
| ATOM | 4154 | CB  | GLN | A | 526 | 23.178 | 12.073 | 29.151 | 1.00 | 18.08 | C   |
| ATOM | 4155 | CG  | GLN | A | 526 | 23.862 | 11.294 | 28.030 | 1.00 | 17.91 | C   |
| ATOM | 4156 | CD  | GLN | A | 526 | 23.946 | 9.804  | 28.298 | 1.00 | 20.28 | C   |
| ATOM | 4157 | NE2 | GLN | A | 526 | 23.552 | 9.007  | 27.320 | 1.00 | 22.11 | N   |
| ATOM | 4158 | OE1 | GLN | A | 526 | 24.427 | 9.376  | 29.339 | 1.00 | 22.06 | O   |
| ATOM | 4159 | N   | THR | A | 527 | 21.660 | 13.145 | 31.398 | 1.00 | 21.86 | N   |
| ATOM | 4160 | CA  | THR | A | 527 | 21.391 | 13.654 | 32.749 | 1.00 | 24.95 | C   |
| ATOM | 4161 | C   | THR | A | 527 | 20.378 | 12.766 | 33.490 | 1.00 | 25.85 | C   |
| ATOM | 4162 | O   | THR | A | 527 | 20.595 | 12.424 | 34.646 | 1.00 | 27.72 | O   |
| ATOM | 4163 | CB  | THR | A | 527 | 20.843 | 15.103 | 32.733 | 1.00 | 25.26 | C   |
| ATOM | 4164 | CG2 | THR | A | 527 | 21.009 | 15.752 | 34.105 | 1.00 | 23.79 | C   |
| ATOM | 4165 | OG1 | THR | A | 527 | 21.544 | 15.880 | 31.752 | 1.00 | 24.22 | O   |
| ATOM | 4166 | N   | ALA | A | 528 | 19.375 | 12.254 | 32.771 | 1.00 | 27.33 | N   |
| ATOM | 4167 | CA  | ALA | A | 528 | 18.426 | 11.281 | 33.333 | 1.00 | 26.81 | C   |
| ATOM | 4168 | C   | ALA | A | 528 | 18.996 | 9.857  | 33.369 | 1.00 | 25.61 | C   |
| ATOM | 4169 | O   | ALA | A | 528 | 18.965 | 9.204  | 34.412 | 1.00 | 25.23 | O   |
| ATOM | 4170 | CB  | ALA | A | 528 | 17.100 | 11.306 | 32.562 | 1.00 | 25.49 | C   |
| ATOM | 4171 | N   | LEU | A | 529 | 19.654 | 9.438  | 32.296 | 1.00 | 24.25 | N   |
| ATOM | 4172 | CA  | LEU | A | 529 | 20.315 | 8.139  | 32.279 | 1.00 | 25.05 | C   |
| ATOM | 4173 | C   | LEU | A | 529 | 21.267 | 7.996  | 33.493 | 1.00 | 25.41 | C   |
| ATOM | 4174 | O   | LEU | A | 529 | 21.762 | 6.891  | 33.797 | 1.00 | 25.16 | O   |
| ATOM | 4175 | CB  | LEU | A | 529 | 21.086 | 7.959  | 30.955 | 1.00 | 25.66 | C   |
| ATOM | 4176 | CG  | LEU | A | 529 | 20.727 | 6.802  | 30.000 | 1.00 | 24.04 | C   |
| ATOM | 4177 | CD1 | LEU | A | 529 | 20.160 | 7.352  | 28.710 | 1.00 | 19.96 | C   |
| ATOM | 4178 | CD2 | LEU | A | 529 | 21.952 | 5.961  | 29.702 | 1.00 | 21.68 | C   |
| ATOM | 4179 | N   | VAL | A | 530 | 21.523 | 9.116  | 34.175 | 1.00 | 24.26 | N   |
| ATOM | 4180 | CA  | VAL | A | 530 | 22.246 | 9.102  | 35.440 | 1.00 | 22.74 | C   |
| ATOM | 4181 | C   | VAL | A | 530 | 21.369 | 8.479  | 36.518 | 1.00 | 23.56 | C   |
| ATOM | 4182 | O   | VAL | A | 530 | 21.867 | 7.708  | 37.360 | 1.00 | 22.76 | O   |
| ATOM | 4183 | CB  | VAL | A | 530 | 22.618 | 10.525 | 35.896 | 1.00 | 23.03 | C   |
| ATOM | 4184 | CG1 | VAL | A | 530 | 23.610 | 10.471 | 37.036 | 1.00 | 24.30 | C   |
| ATOM | 4185 | CG2 | VAL | A | 530 | 23.200 | 11.305 | 34.754 | 1.00 | 22.73 | C   |
| ATOM | 4186 | N   | GLU | A | 531 | 20.076 | 8.831  | 36.502 | 1.00 | 22.46 | N   |
| ATOM | 4187 | CA  | GLU | A | 531 | 19.139 | 8.472  | 37.575 | 1.00 | 23.18 | C   |
| ATOM | 4188 | C   | GLU | A | 531 | 19.096 | 7.000  | 37.982 | 1.00 | 24.30 | C   |
| ATOM | 4189 | O   | GLU | A | 531 | 19.552 | 6.668  | 39.074 | 1.00 | 28.02 | O   |
| ATOM | 4190 | CB  | GLU | A | 531 | 17.728 | 8.959  | 37.262 | 1.00 | 22.28 | C   |
| ATOM | 4191 | CG  | GLU | A | 531 | 16.791 | 8.825  | 38.456 | 1.00 | 21.12 | C   |
| ATOM | 4192 | CD  | GLU | A | 531 | 16.177 | 10.137 | 38.917 | 1.00 | 19.64 | C   |
| ATOM | 4193 | OE1 | GLU | A | 531 | 16.850 | 10.917 | 39.623 | 1.00 | 18.65 | O   |
| ATOM | 4194 | OE2 | GLU | A | 531 | 14.977 | 10.337 | 38.671 | 1.00 | 18.88 | O1- |
| ATOM | 4195 | N   | LEU | A | 532 | 18.603 | 6.115  | 37.114 | 1.00 | 23.63 | N   |
| ATOM | 4196 | CA  | LEU | A | 532 | 18.693 | 4.662  | 37.362 | 1.00 | 24.00 | C   |
| ATOM | 4197 | C   | LEU | A | 532 | 19.972 | 4.240  | 38.078 | 1.00 | 24.04 | C   |
| ATOM | 4198 | O   | LEU | A | 532 | 19.907 | 3.770  | 39.211 | 1.00 | 26.15 | O   |
| ATOM | 4199 | CB  | LEU | A | 532 | 18.604 | 3.854  | 36.071 | 1.00 | 22.16 | C   |
| ATOM | 4200 | CG  | LEU | A | 532 | 17.991 | 4.619  | 34.926 | 1.00 | 23.10 | C   |
| ATOM | 4201 | CD1 | LEU | A | 532 | 19.075 | 5.386  | 34.246 | 1.00 | 28.26 | C   |
| ATOM | 4202 | CD2 | LEU | A | 532 | 17.348 | 3.681  | 33.973 | 1.00 | 27.82 | C   |
| ATOM | 4203 | N   | VAL | A | 533 | 21.131 | 4.440  | 37.442 | 1.00 | 22.79 | N   |
| ATOM | 4204 | CA  | VAL | A | 533 | 22.397 | 3.925  | 37.974 | 1.00 | 19.76 | C   |
| ATOM | 4205 | C   | VAL | A | 533 | 22.905 | 4.700  | 39.179 | 1.00 | 18.89 | C   |
| ATOM | 4206 | O   | VAL | A | 533 | 23.874 | 4.302  | 39.806 | 1.00 | 19.08 | O   |
| ATOM | 4207 | CB  | VAL | A | 533 | 23.521 | 3.852  | 36.889 | 1.00 | 18.59 | C   |
| ATOM | 4208 | CG1 | VAL | A | 533 | 23.308 | 2.624  | 35.996 | 1.00 | 15.07 | C   |
| ATOM | 4209 | CG2 | VAL | A | 533 | 23.560 | 5.142  | 36.045 | 1.00 | 20.41 | C   |
| ATOM | 4210 | N   | LYS | A | 534 | 22.243 | 5.792  | 39.530 | 1.00 | 19.45 | N   |
| ATOM | 4211 | CA  | LYS | A | 534 | 22.478 | 6.365  | 40.845 | 1.00 | 21.27 | C   |
| ATOM | 4212 | C   | LYS | A | 534 | 21.526 | 5.757  | 41.868 | 1.00 | 21.02 | C   |

|      |      |     |     |   |     |        |        |        |      |       |     |
|------|------|-----|-----|---|-----|--------|--------|--------|------|-------|-----|
| ATOM | 4213 | O   | LYS | A | 534 | 21.531 | 6.167  | 43.023 | 1.00 | 20.41 | O   |
| ATOM | 4214 | CB  | LYS | A | 534 | 22.357 | 7.898  | 40.818 | 1.00 | 22.77 | C   |
| ATOM | 4215 | CG  | LYS | A | 534 | 20.941 | 8.444  | 40.696 | 1.00 | 23.98 | C   |
| ATOM | 4216 | CD  | LYS | A | 534 | 20.290 | 8.641  | 42.054 | 1.00 | 28.34 | C   |
| ATOM | 4217 | CE  | LYS | A | 534 | 18.928 | 7.988  | 42.095 | 1.00 | 26.73 | C   |
| ATOM | 4218 | NZ  | LYS | A | 534 | 18.037 | 8.601  | 41.075 | 1.00 | 25.87 | N1+ |
| ATOM | 4219 | N   | HIS | A | 535 | 20.627 | 4.879  | 41.418 | 1.00 | 21.35 | N   |
| ATOM | 4220 | CA  | HIS | A | 535 | 19.932 | 3.950  | 42.323 | 1.00 | 20.99 | C   |
| ATOM | 4221 | C   | HIS | A | 535 | 19.602 | 2.550  | 41.769 | 1.00 | 22.37 | C   |
| ATOM | 4222 | O   | HIS | A | 535 | 18.524 | 2.290  | 41.214 | 1.00 | 22.53 | O   |
| ATOM | 4223 | CB  | HIS | A | 535 | 18.722 | 4.628  | 42.999 | 1.00 | 20.28 | C   |
| ATOM | 4224 | CG  | HIS | A | 535 | 17.424 | 4.489  | 42.272 | 1.00 | 16.66 | C   |
| ATOM | 4225 | CD2 | HIS | A | 535 | 17.111 | 4.603  | 40.961 | 1.00 | 19.33 | C   |
| ATOM | 4226 | ND1 | HIS | A | 535 | 16.227 | 4.401  | 42.941 | 1.00 | 14.54 | N   |
| ATOM | 4227 | CE1 | HIS | A | 535 | 15.235 | 4.488  | 42.081 | 1.00 | 19.05 | C   |
| ATOM | 4228 | NE2 | HIS | A | 535 | 15.743 | 4.611  | 40.868 | 1.00 | 19.23 | N   |
| ATOM | 4229 | N   | LYS | A | 536 | 20.476 | 1.632  | 42.174 | 1.00 | 22.18 | N   |
| ATOM | 4230 | CA  | LYS | A | 536 | 20.778 | 0.332  | 41.553 | 1.00 | 23.44 | C   |
| ATOM | 4231 | C   | LYS | A | 536 | 22.184 | 0.035  | 42.107 | 1.00 | 26.46 | C   |
| ATOM | 4232 | O   | LYS | A | 536 | 22.757 | -1.031 | 41.833 | 1.00 | 24.60 | O   |
| ATOM | 4233 | CB  | LYS | A | 536 | 20.884 | 0.419  | 40.023 | 1.00 | 18.83 | C   |
| ATOM | 4234 | CG  | LYS | A | 536 | 19.572 | 0.375  | 39.276 | 1.00 | 14.87 | C   |
| ATOM | 4235 | CD  | LYS | A | 536 | 19.778 | 0.539  | 37.773 | 1.00 | 12.15 | C   |
| ATOM | 4236 | CE  | LYS | A | 536 | 20.178 | -0.774 | 37.107 | 1.00 | 12.18 | C   |
| ATOM | 4237 | NZ  | LYS | A | 536 | 19.620 | -0.875 | 35.727 | 1.00 | 11.32 | N1+ |
| ATOM | 4238 | N   | PRO | A | 537 | 22.840 | 1.084  | 42.670 | 1.00 | 28.07 | N   |
| ATOM | 4239 | CA  | PRO | A | 537 | 23.264 | 1.257  | 44.063 | 1.00 | 27.56 | C   |
| ATOM | 4240 | C   | PRO | A | 537 | 22.139 | 1.885  | 44.911 | 1.00 | 26.87 | C   |
| ATOM | 4241 | O   | PRO | A | 537 | 21.305 | 2.611  | 44.393 | 1.00 | 26.05 | O   |
| ATOM | 4242 | CB  | PRO | A | 537 | 24.475 | 2.181  | 43.918 | 1.00 | 26.82 | C   |
| ATOM | 4243 | CG  | PRO | A | 537 | 24.086 | 3.095  | 42.877 | 1.00 | 29.18 | C   |
| ATOM | 4244 | CD  | PRO | A | 537 | 23.285 | 2.244  | 41.868 | 1.00 | 30.49 | C   |
| ATOM | 4245 | N   | LYS | A | 538 | 22.119 | 1.587  | 46.205 | 1.00 | 28.13 | N   |
| ATOM | 4246 | CA  | LYS | A | 538 | 21.009 | 1.933  | 47.109 | 1.00 | 27.98 | C   |
| ATOM | 4247 | C   | LYS | A | 538 | 19.630 | 2.015  | 46.460 | 1.00 | 26.40 | C   |
| ATOM | 4248 | O   | LYS | A | 538 | 19.218 | 3.072  | 45.974 | 1.00 | 24.43 | O   |
| ATOM | 4249 | CB  | LYS | A | 538 | 21.297 | 3.229  | 47.883 | 1.00 | 29.62 | C   |
| ATOM | 4250 | CG  | LYS | A | 538 | 21.027 | 3.139  | 49.423 | 1.00 | 25.31 | C   |
| ATOM | 4251 | CD  | LYS | A | 538 | 22.012 | 2.197  | 50.131 | 1.00 | 24.14 | C   |
| ATOM | 4252 | CE  | LYS | A | 538 | 21.945 | 2.359  | 51.647 | 1.00 | 23.68 | C   |
| ATOM | 4253 | NZ  | LYS | A | 538 | 23.277 | 2.474  | 52.317 | 1.00 | 18.75 | N1+ |
| ATOM | 4254 | N   | ALA | A | 539 | 18.869 | 0.938  | 46.625 | 1.00 | 24.41 | N   |
| ATOM | 4255 | CA  | ALA | A | 539 | 17.672 | 0.728  | 45.840 | 1.00 | 24.62 | C   |
| ATOM | 4256 | C   | ALA | A | 539 | 16.793 | 1.958  | 45.958 | 1.00 | 23.58 | C   |
| ATOM | 4257 | O   | ALA | A | 539 | 16.534 | 2.635  | 44.963 | 1.00 | 22.67 | O   |
| ATOM | 4258 | CB  | ALA | A | 539 | 16.943 | -0.511 | 46.325 | 1.00 | 25.28 | C   |
| ATOM | 4259 | N   | THR | A | 540 | 16.559 | 2.380  | 47.195 | 1.00 | 23.77 | N   |
| ATOM | 4260 | CA  | THR | A | 540 | 15.772 | 3.585  | 47.440 | 1.00 | 23.68 | C   |
| ATOM | 4261 | C   | THR | A | 540 | 16.133 | 4.351  | 48.713 | 1.00 | 25.34 | C   |
| ATOM | 4262 | O   | THR | A | 540 | 16.602 | 3.772  | 49.709 | 1.00 | 23.64 | O   |
| ATOM | 4263 | CB  | THR | A | 540 | 14.275 | 3.272  | 47.461 | 1.00 | 21.40 | C   |
| ATOM | 4264 | CG2 | THR | A | 540 | 13.857 | 2.656  | 48.804 | 1.00 | 20.40 | C   |
| ATOM | 4265 | OG1 | THR | A | 540 | 13.546 | 4.479  | 47.220 | 1.00 | 20.73 | O   |
| ATOM | 4266 | N   | LYS | A | 541 | 15.942 | 5.666  | 48.654 | 1.00 | 26.45 | N   |
| ATOM | 4267 | CA  | LYS | A | 541 | 16.156 | 6.528  | 49.810 | 1.00 | 28.39 | C   |
| ATOM | 4268 | C   | LYS | A | 541 | 15.191 | 7.698  | 49.794 | 1.00 | 27.80 | C   |
| ATOM | 4269 | O   | LYS | A | 541 | 14.459 | 7.884  | 48.830 | 1.00 | 29.39 | O   |
| ATOM | 4270 | CB  | LYS | A | 541 | 17.608 | 7.027  | 49.847 | 1.00 | 29.26 | C   |
| ATOM | 4271 | CG  | LYS | A | 541 | 18.614 | 5.982  | 50.350 | 1.00 | 25.06 | C   |
| ATOM | 4272 | CD  | LYS | A | 541 | 18.582 | 5.886  | 51.869 | 1.00 | 20.48 | C   |
| ATOM | 4273 | CE  | LYS | A | 541 | 19.335 | 7.030  | 52.505 | 1.00 | 17.85 | C   |
| ATOM | 4274 | NZ  | LYS | A | 541 | 20.734 | 7.139  | 52.022 | 1.00 | 16.81 | N1+ |
| ATOM | 4275 | N   | GLU | A | 542 | 15.016 | 8.318  | 50.952 | 1.00 | 29.97 | N   |
| ATOM | 4276 | CA  | GLU | A | 542 | 14.101 | 9.453  | 51.086 | 1.00 | 31.00 | C   |
| ATOM | 4277 | C   | GLU | A | 542 | 14.840 | 10.660 | 50.478 | 1.00 | 30.24 | C   |
| ATOM | 4278 | O   | GLU | A | 542 | 15.814 | 10.456 | 49.756 | 1.00 | 29.44 | O   |
| ATOM | 4279 | CB  | GLU | A | 542 | 13.755 | 9.669  | 52.582 | 1.00 | 29.69 | C   |
| ATOM | 4280 | CG  | GLU | A | 542 | 12.602 | 10.630 | 52.878 | 1.00 | 26.76 | C   |
| ATOM | 4281 | CD  | GLU | A | 542 | 11.289 | 10.221 | 52.240 | 1.00 | 26.79 | C   |
| ATOM | 4282 | OE1 | GLU | A | 542 | 11.093 | 9.010  | 51.995 | 1.00 | 25.61 | O   |
| ATOM | 4283 | OE2 | GLU | A | 542 | 10.425 | 11.112 | 52.035 | 1.00 | 25.89 | O1- |

|      |      |     |     |   |     |        |        |        |      |       |     |
|------|------|-----|-----|---|-----|--------|--------|--------|------|-------|-----|
| ATOM | 4284 | N   | GLN | A | 543 | 14.538 | 11.862 | 50.981 | 1.00 | 30.95 | N   |
| ATOM | 4285 | CA  | GLN | A | 543 | 15.020 | 13.157 | 50.451 | 1.00 | 29.95 | C   |
| ATOM | 4286 | C   | GLN | A | 543 | 16.307 | 13.073 | 49.606 | 1.00 | 29.03 | C   |
| ATOM | 4287 | O   | GLN | A | 543 | 16.294 | 13.347 | 48.389 | 1.00 | 25.49 | O   |
| ATOM | 4288 | CB  | GLN | A | 543 | 15.208 | 14.161 | 51.624 | 1.00 | 26.87 | C   |
| ATOM | 4289 | CG  | GLN | A | 543 | 16.249 | 13.747 | 52.684 | 1.00 | 21.98 | C   |
| ATOM | 4290 | CD  | GLN | A | 543 | 15.650 | 13.140 | 53.962 | 1.00 | 21.18 | C   |
| ATOM | 4291 | NE2 | GLN | A | 543 | 16.336 | 13.335 | 55.077 | 1.00 | 20.31 | N   |
| ATOM | 4292 | OE1 | GLN | A | 543 | 14.613 | 12.479 | 53.939 | 1.00 | 20.60 | O   |
| ATOM | 4293 | N   | LEU | A | 544 | 17.307 | 12.444 | 50.225 | 1.00 | 26.45 | N   |
| ATOM | 4294 | CA  | LEU | A | 544 | 18.653 | 12.279 | 49.694 | 1.00 | 24.19 | C   |
| ATOM | 4295 | C   | LEU | A | 544 | 18.793 | 12.637 | 48.228 | 1.00 | 22.92 | C   |
| ATOM | 4296 | O   | LEU | A | 544 | 19.185 | 13.758 | 47.923 | 1.00 | 23.86 | O   |
| ATOM | 4297 | CB  | LEU | A | 544 | 19.140 | 10.841 | 49.914 | 1.00 | 21.09 | C   |
| ATOM | 4298 | CG  | LEU | A | 544 | 19.186 | 10.233 | 51.311 | 1.00 | 16.44 | C   |
| ATOM | 4299 | CD1 | LEU | A | 544 | 19.940 | 11.158 | 52.243 | 1.00 | 16.15 | C   |
| ATOM | 4300 | CD2 | LEU | A | 544 | 17.789 | 9.967  | 51.819 | 1.00 | 16.66 | C   |
| ATOM | 4301 | N   | LYS | A | 545 | 18.194 | 11.817 | 47.362 | 1.00 | 20.06 | N   |
| ATOM | 4302 | CA  | LYS | A | 545 | 18.749 | 11.587 | 46.040 | 1.00 | 20.52 | C   |
| ATOM | 4303 | C   | LYS | A | 545 | 18.614 | 12.701 | 45.002 | 1.00 | 22.77 | C   |
| ATOM | 4304 | O   | LYS | A | 545 | 18.889 | 12.471 | 43.832 | 1.00 | 25.57 | O   |
| ATOM | 4305 | CB  | LYS | A | 545 | 18.248 | 10.254 | 45.461 | 1.00 | 18.18 | C   |
| ATOM | 4306 | CG  | LYS | A | 545 | 16.821 | 10.244 | 44.916 | 1.00 | 17.26 | C   |
| ATOM | 4307 | CD  | LYS | A | 545 | 15.906 | 9.289  | 45.696 | 1.00 | 12.74 | C   |
| ATOM | 4308 | CE  | LYS | A | 545 | 16.474 | 7.882  | 45.800 | 1.00 | 8.79  | C   |
| ATOM | 4309 | NZ  | LYS | A | 545 | 17.238 | 7.691  | 47.056 | 1.00 | 6.18  | N1+ |
| ATOM | 4310 | N   | ALA | A | 546 | 18.410 | 13.938 | 45.439 | 1.00 | 23.50 | N   |
| ATOM | 4311 | CA  | ALA | A | 546 | 18.556 | 15.071 | 44.535 | 1.00 | 22.32 | C   |
| ATOM | 4312 | C   | ALA | A | 546 | 19.741 | 15.954 | 44.903 | 1.00 | 22.35 | C   |
| ATOM | 4313 | O   | ALA | A | 546 | 20.086 | 16.854 | 44.156 | 1.00 | 23.42 | O   |
| ATOM | 4314 | CB  | ALA | A | 546 | 17.277 | 15.899 | 44.490 | 1.00 | 23.51 | C   |
| ATOM | 4315 | N   | VAL | A | 547 | 20.379 | 15.694 | 46.036 | 1.00 | 22.24 | N   |
| ATOM | 4316 | CA  | VAL | A | 547 | 21.717 | 16.229 | 46.279 | 1.00 | 23.87 | C   |
| ATOM | 4317 | C   | VAL | A | 547 | 22.677 | 15.472 | 45.360 | 1.00 | 23.89 | C   |
| ATOM | 4318 | O   | VAL | A | 547 | 23.877 | 15.782 | 45.287 | 1.00 | 23.60 | O   |
| ATOM | 4319 | CB  | VAL | A | 547 | 22.170 | 16.040 | 47.768 | 1.00 | 25.64 | C   |
| ATOM | 4320 | CG1 | VAL | A | 547 | 22.400 | 14.566 | 48.059 | 1.00 | 25.82 | C   |
| ATOM | 4321 | CG2 | VAL | A | 547 | 23.449 | 16.861 | 48.073 | 1.00 | 24.16 | C   |
| ATOM | 4322 | N   | MET | A | 548 | 22.132 | 14.475 | 44.661 | 1.00 | 22.84 | N   |
| ATOM | 4323 | CA  | MET | A | 548 | 22.841 | 13.763 | 43.593 | 1.00 | 20.52 | C   |
| ATOM | 4324 | C   | MET | A | 548 | 22.779 | 14.480 | 42.239 | 1.00 | 17.26 | C   |
| ATOM | 4325 | O   | MET | A | 548 | 23.748 | 15.082 | 41.805 | 1.00 | 17.45 | O   |
| ATOM | 4326 | CB  | MET | A | 548 | 22.268 | 12.353 | 43.445 | 1.00 | 21.64 | C   |
| ATOM | 4327 | CG  | MET | A | 548 | 22.122 | 11.605 | 44.756 | 1.00 | 18.22 | C   |
| ATOM | 4328 | SD  | MET | A | 548 | 23.630 | 10.850 | 45.228 | 1.00 | 14.88 | S   |
| ATOM | 4329 | CE  | MET | A | 548 | 24.207 | 12.056 | 46.438 | 1.00 | 16.13 | C   |
| ATOM | 4330 | N   | ASP | A | 549 | 21.618 | 14.485 | 41.609 | 1.00 | 13.78 | N   |
| ATOM | 4331 | CA  | ASP | A | 549 | 21.502 | 15.018 | 40.264 | 1.00 | 16.01 | C   |
| ATOM | 4332 | C   | ASP | A | 549 | 21.636 | 16.528 | 40.156 | 1.00 | 18.51 | C   |
| ATOM | 4333 | O   | ASP | A | 549 | 21.000 | 17.147 | 39.300 | 1.00 | 20.40 | O   |
| ATOM | 4334 | CB  | ASP | A | 549 | 20.174 | 14.604 | 39.649 | 1.00 | 14.29 | C   |
| ATOM | 4335 | CG  | ASP | A | 549 | 20.323 | 13.496 | 38.677 | 1.00 | 14.70 | C   |
| ATOM | 4336 | OD1 | ASP | A | 549 | 21.204 | 12.641 | 38.891 | 1.00 | 11.87 | O   |
| ATOM | 4337 | OD2 | ASP | A | 549 | 19.566 | 13.495 | 37.687 | 1.00 | 17.11 | O1- |
| ATOM | 4338 | N   | ASP | A | 550 | 22.330 | 17.136 | 41.102 | 1.00 | 19.81 | N   |
| ATOM | 4339 | CA  | ASP | A | 550 | 22.847 | 18.486 | 40.917 | 1.00 | 25.24 | C   |
| ATOM | 4340 | C   | ASP | A | 550 | 24.372 | 18.383 | 41.093 | 1.00 | 27.84 | C   |
| ATOM | 4341 | O   | ASP | A | 550 | 25.143 | 18.785 | 40.213 | 1.00 | 29.39 | O   |
| ATOM | 4342 | CB  | ASP | A | 550 | 22.214 | 19.460 | 41.935 | 1.00 | 24.68 | C   |
| ATOM | 4343 | CG  | ASP | A | 550 | 20.805 | 19.913 | 41.527 | 1.00 | 25.32 | C   |
| ATOM | 4344 | OD1 | ASP | A | 550 | 20.168 | 19.239 | 40.694 | 1.00 | 26.62 | O   |
| ATOM | 4345 | OD2 | ASP | A | 550 | 20.334 | 20.971 | 42.003 | 1.00 | 23.45 | O1- |
| ATOM | 4346 | N   | PHE | A | 551 | 24.778 | 17.554 | 42.046 | 1.00 | 29.10 | N   |
| ATOM | 4347 | CA  | PHE | A | 551 | 26.143 | 17.056 | 42.061 | 1.00 | 29.37 | C   |
| ATOM | 4348 | C   | PHE | A | 551 | 26.481 | 16.269 | 40.798 | 1.00 | 28.36 | C   |
| ATOM | 4349 | O   | PHE | A | 551 | 27.633 | 15.963 | 40.538 | 1.00 | 29.93 | O   |
| ATOM | 4350 | CB  | PHE | A | 551 | 26.361 | 16.227 | 43.324 | 1.00 | 30.56 | C   |
| ATOM | 4351 | CG  | PHE | A | 551 | 26.670 | 17.064 | 44.509 | 1.00 | 31.41 | C   |
| ATOM | 4352 | CD1 | PHE | A | 551 | 26.260 | 18.398 | 44.526 | 1.00 | 31.60 | C   |
| ATOM | 4353 | CD2 | PHE | A | 551 | 27.588 | 16.637 | 45.447 | 1.00 | 32.87 | C   |
| ATOM | 4354 | CE1 | PHE | A | 551 | 26.774 | 19.299 | 45.427 | 1.00 | 31.67 | C   |

|      |      |     |     |   |     |        |        |        |      |       |     |
|------|------|-----|-----|---|-----|--------|--------|--------|------|-------|-----|
| ATOM | 4355 | CE2 | PHE | A | 551 | 28.120 | 17.542 | 46.375 | 1.00 | 34.18 | C   |
| ATOM | 4356 | CZ  | PHE | A | 551 | 27.712 | 18.878 | 46.357 | 1.00 | 33.28 | C   |
| ATOM | 4357 | N   | ALA | A | 552 | 25.470 | 16.021 | 39.976 | 1.00 | 27.01 | N   |
| ATOM | 4358 | CA  | ALA | A | 552 | 25.676 | 15.608 | 38.605 | 1.00 | 25.37 | C   |
| ATOM | 4359 | C   | ALA | A | 552 | 24.735 | 16.431 | 37.719 | 1.00 | 25.73 | C   |
| ATOM | 4360 | O   | ALA | A | 552 | 23.980 | 15.910 | 36.886 | 1.00 | 24.39 | O   |
| ATOM | 4361 | CB  | ALA | A | 552 | 25.417 | 14.134 | 38.461 | 1.00 | 26.18 | C   |
| ATOM | 4362 | N   | ALA | A | 553 | 24.769 | 17.732 | 37.975 | 1.00 | 24.63 | N   |
| ATOM | 4363 | CA  | ALA | A | 553 | 24.274 | 18.746 | 37.068 | 1.00 | 22.98 | C   |
| ATOM | 4364 | C   | ALA | A | 553 | 25.328 | 19.824 | 37.002 | 1.00 | 25.17 | C   |
| ATOM | 4365 | O   | ALA | A | 553 | 25.138 | 20.792 | 36.306 | 1.00 | 26.82 | O   |
| ATOM | 4366 | CB  | ALA | A | 553 | 23.003 | 19.333 | 37.572 | 1.00 | 23.98 | C   |
| ATOM | 4367 | N   | PHE | A | 554 | 26.340 | 19.752 | 37.866 | 1.00 | 27.85 | N   |
| ATOM | 4368 | CA  | PHE | A | 554 | 27.586 | 20.505 | 37.668 | 1.00 | 28.64 | C   |
| ATOM | 4369 | C   | PHE | A | 554 | 28.412 | 19.808 | 36.596 | 1.00 | 25.54 | C   |
| ATOM | 4370 | O   | PHE | A | 554 | 29.324 | 20.398 | 36.026 | 1.00 | 24.77 | O   |
| ATOM | 4371 | CB  | PHE | A | 554 | 28.405 | 20.583 | 38.968 | 1.00 | 32.92 | C   |
| ATOM | 4372 | CG  | PHE | A | 554 | 28.806 | 21.997 | 39.366 | 1.00 | 37.67 | C   |
| ATOM | 4373 | CD1 | PHE | A | 554 | 28.374 | 23.110 | 38.618 | 1.00 | 39.00 | C   |
| ATOM | 4374 | CD2 | PHE | A | 554 | 29.534 | 22.220 | 40.544 | 1.00 | 37.65 | C   |
| ATOM | 4375 | CE1 | PHE | A | 554 | 28.648 | 24.436 | 39.051 | 1.00 | 39.21 | C   |
| ATOM | 4376 | CE2 | PHE | A | 554 | 29.818 | 23.532 | 40.984 | 1.00 | 40.34 | C   |
| ATOM | 4377 | CZ  | PHE | A | 554 | 29.369 | 24.647 | 40.233 | 1.00 | 39.54 | C   |
| ATOM | 4378 | N   | VAL | A | 555 | 28.081 | 18.543 | 36.352 | 1.00 | 23.93 | N   |
| ATOM | 4379 | CA  | VAL | A | 555 | 28.467 | 17.800 | 35.147 | 1.00 | 22.21 | C   |
| ATOM | 4380 | C   | VAL | A | 555 | 28.557 | 18.670 | 33.893 | 1.00 | 20.12 | C   |
| ATOM | 4381 | O   | VAL | A | 555 | 29.305 | 18.360 | 32.975 | 1.00 | 18.10 | O   |
| ATOM | 4382 | CB  | VAL | A | 555 | 27.484 | 16.602 | 34.897 | 1.00 | 21.30 | C   |
| ATOM | 4383 | CG1 | VAL | A | 555 | 26.074 | 17.094 | 34.820 | 1.00 | 22.10 | C   |
| ATOM | 4384 | CG2 | VAL | A | 555 | 27.815 | 15.870 | 33.632 | 1.00 | 22.52 | C   |
| ATOM | 4385 | N   | GLU | A | 556 | 27.829 | 19.772 | 33.855 | 1.00 | 20.36 | N   |
| ATOM | 4386 | CA  | GLU | A | 556 | 28.107 | 20.753 | 32.822 | 1.00 | 22.51 | C   |
| ATOM | 4387 | C   | GLU | A | 556 | 29.129 | 21.755 | 33.324 | 1.00 | 22.13 | C   |
| ATOM | 4388 | O   | GLU | A | 556 | 30.316 | 21.503 | 33.183 | 1.00 | 21.46 | O   |
| ATOM | 4389 | CB  | GLU | A | 556 | 26.827 | 21.440 | 32.333 | 1.00 | 24.42 | C   |
| ATOM | 4390 | CG  | GLU | A | 556 | 26.014 | 20.591 | 31.348 | 1.00 | 25.09 | C   |
| ATOM | 4391 | CD  | GLU | A | 556 | 25.397 | 19.340 | 32.002 | 1.00 | 29.89 | C   |
| ATOM | 4392 | OE1 | GLU | A | 556 | 26.157 | 18.391 | 32.313 | 1.00 | 28.92 | O   |
| ATOM | 4393 | OE2 | GLU | A | 556 | 24.150 | 19.300 | 32.192 | 1.00 | 30.78 | O1- |
| ATOM | 4394 | N   | LYS | A | 557 | 28.693 | 22.721 | 34.130 | 1.00 | 23.25 | N   |
| ATOM | 4395 | CA  | LYS | A | 557 | 29.514 | 23.885 | 34.484 | 1.00 | 26.16 | C   |
| ATOM | 4396 | C   | LYS | A | 557 | 30.893 | 23.667 | 35.189 | 1.00 | 28.55 | C   |
| ATOM | 4397 | O   | LYS | A | 557 | 31.455 | 24.625 | 35.736 | 1.00 | 32.54 | O   |
| ATOM | 4398 | CB  | LYS | A | 557 | 28.688 | 24.876 | 35.319 | 1.00 | 25.61 | C   |
| ATOM | 4399 | CG  | LYS | A | 557 | 27.221 | 24.986 | 34.979 | 1.00 | 25.26 | C   |
| ATOM | 4400 | CD  | LYS | A | 557 | 26.383 | 25.468 | 36.212 | 1.00 | 26.93 | C   |
| ATOM | 4401 | CE  | LYS | A | 557 | 24.868 | 25.275 | 35.938 | 1.00 | 29.30 | C   |
| ATOM | 4402 | NZ  | LYS | A | 557 | 23.869 | 26.075 | 36.726 | 1.00 | 26.93 | N1+ |
| ATOM | 4403 | N   | CYS | A | 558 | 31.439 | 22.448 | 35.204 | 1.00 | 28.73 | N   |
| ATOM | 4404 | CA  | CYS | A | 558 | 32.899 | 22.266 | 35.342 | 1.00 | 26.69 | C   |
| ATOM | 4405 | C   | CYS | A | 558 | 33.460 | 21.735 | 34.016 | 1.00 | 26.16 | C   |
| ATOM | 4406 | O   | CYS | A | 558 | 34.575 | 21.193 | 33.962 | 1.00 | 25.82 | O   |
| ATOM | 4407 | CB  | CYS | A | 558 | 33.247 | 21.290 | 36.484 | 1.00 | 27.88 | C   |
| ATOM | 4408 | SG  | CYS | A | 558 | 34.126 | 19.745 | 35.984 | 1.00 | 25.90 | S   |
| ATOM | 4409 | N   | CYS | A | 559 | 32.702 | 21.924 | 32.939 | 1.00 | 24.28 | N   |
| ATOM | 4410 | CA  | CYS | A | 559 | 33.067 | 21.378 | 31.638 | 1.00 | 24.57 | C   |
| ATOM | 4411 | C   | CYS | A | 559 | 33.527 | 22.453 | 30.635 | 1.00 | 25.31 | C   |
| ATOM | 4412 | O   | CYS | A | 559 | 32.955 | 22.594 | 29.534 | 1.00 | 22.80 | O   |
| ATOM | 4413 | CB  | CYS | A | 559 | 31.882 | 20.610 | 31.057 | 1.00 | 24.33 | C   |
| ATOM | 4414 | SG  | CYS | A | 559 | 30.664 | 21.671 | 30.225 | 1.00 | 18.67 | S   |
| ATOM | 4415 | N   | LYS | A | 560 | 34.588 | 23.170 | 30.993 | 1.00 | 24.30 | N   |
| ATOM | 4416 | CA  | LYS | A | 560 | 35.196 | 24.124 | 30.082 | 1.00 | 24.61 | C   |
| ATOM | 4417 | C   | LYS | A | 560 | 36.487 | 24.703 | 30.634 | 1.00 | 24.70 | C   |
| ATOM | 4418 | O   | LYS | A | 560 | 36.873 | 24.417 | 31.765 | 1.00 | 22.58 | O   |
| ATOM | 4419 | CB  | LYS | A | 560 | 34.215 | 25.242 | 29.754 | 1.00 | 25.54 | C   |
| ATOM | 4420 | CG  | LYS | A | 560 | 33.656 | 25.152 | 28.339 | 1.00 | 26.31 | C   |
| ATOM | 4421 | CD  | LYS | A | 560 | 32.511 | 26.109 | 28.108 | 1.00 | 24.00 | C   |
| ATOM | 4422 | CE  | LYS | A | 560 | 31.495 | 25.480 | 27.188 | 1.00 | 25.24 | C   |
| ATOM | 4423 | NZ  | LYS | A | 560 | 31.446 | 24.014 | 27.391 | 1.00 | 26.72 | N1+ |
| ATOM | 4424 | N   | ALA | A | 561 | 37.126 | 25.555 | 29.841 | 1.00 | 24.25 | N   |
| ATOM | 4425 | CA  | ALA | A | 561 | 38.507 | 25.915 | 30.078 | 1.00 | 24.71 | C   |

|      |      |     |     |   |     |        |        |        |      |       |     |
|------|------|-----|-----|---|-----|--------|--------|--------|------|-------|-----|
| ATOM | 4426 | C   | ALA | A | 561 | 39.300 | 24.620 | 30.175 | 1.00 | 26.65 | C   |
| ATOM | 4427 | O   | ALA | A | 561 | 39.333 | 23.999 | 31.218 | 1.00 | 27.41 | O   |
| ATOM | 4428 | CB  | ALA | A | 561 | 38.622 | 26.707 | 31.359 | 1.00 | 25.16 | C   |
| ATOM | 4429 | N   | ASP | A | 562 | 39.642 | 24.065 | 29.016 | 1.00 | 30.60 | N   |
| ATOM | 4430 | CA  | ASP | A | 562 | 40.525 | 22.892 | 28.929 | 1.00 | 30.34 | C   |
| ATOM | 4431 | C   | ASP | A | 562 | 39.961 | 21.653 | 29.616 | 1.00 | 31.09 | C   |
| ATOM | 4432 | O   | ASP | A | 562 | 40.593 | 21.132 | 30.562 | 1.00 | 31.08 | O   |
| ATOM | 4433 | CB  | ASP | A | 562 | 41.905 | 23.198 | 29.516 | 1.00 | 28.16 | C   |
| ATOM | 4434 | CG  | ASP | A | 562 | 42.952 | 22.216 | 29.054 | 1.00 | 25.04 | C   |
| ATOM | 4435 | OD1 | ASP | A | 562 | 42.717 | 21.514 | 28.053 | 1.00 | 24.20 | O   |
| ATOM | 4436 | OD2 | ASP | A | 562 | 44.000 | 22.117 | 29.707 | 1.00 | 28.51 | O1- |
| ATOM | 4437 | N   | ASP | A | 563 | 38.979 | 21.040 | 28.935 | 1.00 | 30.71 | N   |
| ATOM | 4438 | CA  | ASP | A | 563 | 38.059 | 20.068 | 29.538 | 1.00 | 28.76 | C   |
| ATOM | 4439 | C   | ASP | A | 563 | 38.485 | 18.610 | 29.373 | 1.00 | 28.00 | C   |
| ATOM | 4440 | O   | ASP | A | 563 | 39.612 | 18.256 | 29.693 | 1.00 | 28.65 | O   |
| ATOM | 4441 | CB  | ASP | A | 563 | 36.615 | 20.261 | 29.028 | 1.00 | 30.30 | C   |
| ATOM | 4442 | CG  | ASP | A | 563 | 36.508 | 21.125 | 27.746 | 1.00 | 33.01 | C   |
| ATOM | 4443 | OD1 | ASP | A | 563 | 37.154 | 22.206 | 27.640 | 1.00 | 32.70 | O   |
| ATOM | 4444 | OD2 | ASP | A | 563 | 35.634 | 20.803 | 26.908 | 1.00 | 31.15 | O1- |
| ATOM | 4445 | N   | LYS | A | 564 | 37.563 | 17.749 | 28.966 | 1.00 | 29.53 | N   |
| ATOM | 4446 | CA  | LYS | A | 564 | 37.756 | 16.283 | 28.945 | 1.00 | 31.53 | C   |
| ATOM | 4447 | C   | LYS | A | 564 | 38.549 | 15.598 | 30.061 | 1.00 | 32.06 | C   |
| ATOM | 4448 | O   | LYS | A | 564 | 38.498 | 14.370 | 30.188 | 1.00 | 32.29 | O   |
| ATOM | 4449 | CB  | LYS | A | 564 | 38.296 | 15.821 | 27.591 | 1.00 | 30.45 | C   |
| ATOM | 4450 | CG  | LYS | A | 564 | 37.233 | 15.744 | 26.497 | 1.00 | 31.07 | C   |
| ATOM | 4451 | CD  | LYS | A | 564 | 36.111 | 14.775 | 26.849 | 1.00 | 30.53 | C   |
| ATOM | 4452 | CE  | LYS | A | 564 | 35.347 | 14.318 | 25.598 | 1.00 | 32.26 | C   |
| ATOM | 4453 | NZ  | LYS | A | 564 | 35.355 | 12.798 | 25.474 | 1.00 | 34.40 | N1+ |
| ATOM | 4454 | N   | GLU | A | 565 | 39.050 | 16.383 | 31.006 | 1.00 | 34.20 | N   |
| ATOM | 4455 | CA  | GLU | A | 565 | 39.522 | 15.830 | 32.269 | 1.00 | 33.71 | C   |
| ATOM | 4456 | C   | GLU | A | 565 | 39.123 | 16.707 | 33.477 | 1.00 | 33.57 | C   |
| ATOM | 4457 | O   | GLU | A | 565 | 39.325 | 16.298 | 34.620 | 1.00 | 36.71 | O   |
| ATOM | 4458 | CB  | GLU | A | 565 | 41.038 | 15.547 | 32.203 | 1.00 | 31.00 | C   |
| ATOM | 4459 | CG  | GLU | A | 565 | 41.948 | 16.433 | 33.029 | 1.00 | 28.71 | C   |
| ATOM | 4460 | CD  | GLU | A | 565 | 41.705 | 17.906 | 32.810 | 1.00 | 28.14 | C   |
| ATOM | 4461 | OE1 | GLU | A | 565 | 41.476 | 18.343 | 31.664 | 1.00 | 27.94 | O   |
| ATOM | 4462 | OE2 | GLU | A | 565 | 41.605 | 18.611 | 33.826 | 1.00 | 31.46 | O1- |
| ATOM | 4463 | N   | THR | A | 566 | 38.550 | 17.891 | 33.230 | 1.00 | 31.43 | N   |
| ATOM | 4464 | CA  | THR | A | 566 | 37.891 | 18.648 | 34.290 | 1.00 | 30.06 | C   |
| ATOM | 4465 | C   | THR | A | 566 | 36.888 | 17.740 | 34.978 | 1.00 | 31.89 | C   |
| ATOM | 4466 | O   | THR | A | 566 | 37.183 | 17.117 | 36.017 | 1.00 | 33.59 | O   |
| ATOM | 4467 | CB  | THR | A | 566 | 37.091 | 19.837 | 33.754 | 1.00 | 27.34 | C   |
| ATOM | 4468 | CG2 | THR | A | 566 | 37.562 | 21.118 | 34.385 | 1.00 | 29.75 | C   |
| ATOM | 4469 | OG1 | THR | A | 566 | 37.226 | 19.915 | 32.329 | 1.00 | 28.29 | O   |
| ATOM | 4470 | N   | CYS | A | 567 | 35.700 | 17.644 | 34.390 | 1.00 | 32.18 | N   |
| ATOM | 4471 | CA  | CYS | A | 567 | 34.654 | 16.825 | 34.979 | 1.00 | 31.39 | C   |
| ATOM | 4472 | C   | CYS | A | 567 | 34.889 | 15.378 | 34.594 | 1.00 | 29.93 | C   |
| ATOM | 4473 | O   | CYS | A | 567 | 34.352 | 14.909 | 33.590 | 1.00 | 29.42 | O   |
| ATOM | 4474 | CB  | CYS | A | 567 | 33.262 | 17.276 | 34.513 | 1.00 | 29.68 | C   |
| ATOM | 4475 | SG  | CYS | A | 567 | 33.055 | 19.080 | 34.407 | 1.00 | 25.19 | S   |
| ATOM | 4476 | N   | PHE | A | 568 | 35.686 | 14.688 | 35.405 | 1.00 | 28.61 | N   |
| ATOM | 4477 | CA  | PHE | A | 568 | 35.928 | 13.255 | 35.250 | 1.00 | 28.31 | C   |
| ATOM | 4478 | C   | PHE | A | 568 | 36.751 | 12.792 | 36.449 | 1.00 | 29.41 | C   |
| ATOM | 4479 | O   | PHE | A | 568 | 36.664 | 11.642 | 36.860 | 1.00 | 31.51 | O   |
| ATOM | 4480 | CB  | PHE | A | 568 | 36.729 | 12.998 | 33.976 | 1.00 | 25.95 | C   |
| ATOM | 4481 | CG  | PHE | A | 568 | 36.206 | 11.876 | 33.139 | 1.00 | 21.28 | C   |
| ATOM | 4482 | CD1 | PHE | A | 568 | 35.062 | 12.035 | 32.394 | 1.00 | 20.57 | C   |
| ATOM | 4483 | CD2 | PHE | A | 568 | 36.903 | 10.698 | 33.038 | 1.00 | 20.14 | C   |
| ATOM | 4484 | CE1 | PHE | A | 568 | 34.622 | 11.051 | 31.574 | 1.00 | 17.15 | C   |
| ATOM | 4485 | CE2 | PHE | A | 568 | 36.471 | 9.710  | 32.217 | 1.00 | 17.57 | C   |
| ATOM | 4486 | CZ  | PHE | A | 568 | 35.321 | 9.888  | 31.481 | 1.00 | 19.73 | C   |
| ATOM | 4487 | N   | ALA | A | 569 | 37.683 | 13.636 | 36.877 | 1.00 | 28.87 | N   |
| ATOM | 4488 | CA  | ALA | A | 569 | 38.383 | 13.420 | 38.134 | 1.00 | 28.65 | C   |
| ATOM | 4489 | C   | ALA | A | 569 | 37.468 | 13.939 | 39.220 | 1.00 | 28.03 | C   |
| ATOM | 4490 | O   | ALA | A | 569 | 37.356 | 13.378 | 40.309 | 1.00 | 26.78 | O   |
| ATOM | 4491 | CB  | ALA | A | 569 | 39.710 | 14.213 | 38.138 | 1.00 | 30.00 | C   |
| ATOM | 4492 | N   | GLU | A | 570 | 36.832 | 15.057 | 38.898 | 1.00 | 30.62 | N   |
| ATOM | 4493 | CA  | GLU | A | 570 | 36.151 | 15.878 | 39.882 | 1.00 | 30.63 | C   |
| ATOM | 4494 | C   | GLU | A | 570 | 34.945 | 15.123 | 40.390 | 1.00 | 30.05 | C   |
| ATOM | 4495 | O   | GLU | A | 570 | 35.001 | 14.560 | 41.483 | 1.00 | 29.90 | O   |
| ATOM | 4496 | CB  | GLU | A | 570 | 35.749 | 17.210 | 39.258 | 1.00 | 28.89 | C   |



|      |      |     |     |   |     |        |        |        |      |       |     |
|------|------|-----|-----|---|-----|--------|--------|--------|------|-------|-----|
| ATOM | 4497 | CG  | GLU | A | 570 | 36.936 | 18.084 | 38.893 | 1.00 | 27.66 | C   |
| ATOM | 4498 | CD  | GLU | A | 570 | 36.512 | 19.417 | 38.301 | 1.00 | 29.60 | C   |
| ATOM | 4499 | OE1 | GLU | A | 570 | 35.295 | 19.714 | 38.265 | 1.00 | 27.40 | O   |
| ATOM | 4500 | OE2 | GLU | A | 570 | 37.407 | 20.200 | 37.922 | 1.00 | 31.42 | O1- |
| ATOM | 4501 | N   | GLU | A | 571 | 33.921 | 15.009 | 39.544 | 1.00 | 28.64 | N   |
| ATOM | 4502 | CA  | GLU | A | 571 | 32.793 | 14.109 | 39.781 | 1.00 | 29.73 | C   |
| ATOM | 4503 | C   | GLU | A | 571 | 33.172 | 12.828 | 40.555 | 1.00 | 29.42 | C   |
| ATOM | 4504 | O   | GLU | A | 571 | 32.703 | 12.600 | 41.666 | 1.00 | 26.88 | O   |
| ATOM | 4505 | CB  | GLU | A | 571 | 32.153 | 13.698 | 38.444 | 1.00 | 31.90 | C   |
| ATOM | 4506 | CG  | GLU | A | 571 | 31.887 | 14.842 | 37.444 | 1.00 | 33.12 | C   |
| ATOM | 4507 | CD  | GLU | A | 571 | 30.475 | 15.396 | 37.551 | 1.00 | 31.21 | C   |
| ATOM | 4508 | OE1 | GLU | A | 571 | 30.276 | 16.300 | 38.392 | 1.00 | 29.20 | O   |
| ATOM | 4509 | OE2 | GLU | A | 571 | 29.584 | 14.930 | 36.791 | 1.00 | 28.63 | O1- |
| ATOM | 4510 | N   | GLY | A | 572 | 34.072 | 12.032 | 39.986 | 1.00 | 29.49 | N   |
| ATOM | 4511 | CA  | GLY | A | 572 | 34.301 | 10.677 | 40.478 | 1.00 | 28.71 | C   |
| ATOM | 4512 | C   | GLY | A | 572 | 34.559 | 10.612 | 41.965 | 1.00 | 25.97 | C   |
| ATOM | 4513 | O   | GLY | A | 572 | 34.133 | 9.670  | 42.649 | 1.00 | 25.03 | O   |
| ATOM | 4514 | N   | LYS | A | 573 | 35.292 | 11.596 | 42.463 | 1.00 | 25.00 | N   |
| ATOM | 4515 | CA  | LYS | A | 573 | 35.292 | 11.839 | 43.886 | 1.00 | 26.40 | C   |
| ATOM | 4516 | C   | LYS | A | 573 | 33.907 | 12.403 | 44.227 | 1.00 | 27.40 | C   |
| ATOM | 4517 | O   | LYS | A | 573 | 33.053 | 11.637 | 44.652 | 1.00 | 28.80 | O   |
| ATOM | 4518 | CB  | LYS | A | 573 | 36.422 | 12.802 | 44.278 | 1.00 | 25.67 | C   |
| ATOM | 4519 | CG  | LYS | A | 573 | 37.835 | 12.284 | 43.924 | 1.00 | 24.04 | C   |
| ATOM | 4520 | CD  | LYS | A | 573 | 38.725 | 12.132 | 45.169 | 1.00 | 21.49 | C   |
| ATOM | 4521 | CE  | LYS | A | 573 | 39.633 | 13.331 | 45.408 | 1.00 | 17.20 | C   |
| ATOM | 4522 | NZ  | LYS | A | 573 | 40.867 | 12.848 | 46.062 | 1.00 | 15.20 | N1+ |
| ATOM | 4523 | N   | LYS | A | 574 | 33.581 | 13.580 | 43.695 | 1.00 | 26.75 | N   |
| ATOM | 4524 | CA  | LYS | A | 574 | 32.400 | 14.324 | 44.131 | 1.00 | 25.51 | C   |
| ATOM | 4525 | C   | LYS | A | 574 | 30.989 | 13.898 | 43.651 | 1.00 | 25.42 | C   |
| ATOM | 4526 | O   | LYS | A | 574 | 30.011 | 14.569 | 44.005 | 1.00 | 25.17 | O   |
| ATOM | 4527 | CB  | LYS | A | 574 | 32.612 | 15.817 | 43.872 | 1.00 | 27.14 | C   |
| ATOM | 4528 | CG  | LYS | A | 574 | 32.851 | 16.209 | 42.416 | 1.00 | 28.72 | C   |
| ATOM | 4529 | CD  | LYS | A | 574 | 32.816 | 17.739 | 42.193 | 1.00 | 28.75 | C   |
| ATOM | 4530 | CE  | LYS | A | 574 | 31.382 | 18.254 | 41.916 | 1.00 | 28.20 | C   |
| ATOM | 4531 | NZ  | LYS | A | 574 | 31.384 | 19.599 | 41.254 | 1.00 | 28.78 | N1+ |
| ATOM | 4532 | N   | LEU | A | 575 | 30.860 | 12.683 | 43.105 | 1.00 | 23.44 | N   |
| ATOM | 4533 | CA  | LEU | A | 575 | 29.559 | 12.086 | 42.759 | 1.00 | 25.31 | C   |
| ATOM | 4534 | C   | LEU | A | 575 | 29.409 | 10.605 | 43.176 | 1.00 | 27.47 | C   |
| ATOM | 4535 | O   | LEU | A | 575 | 28.300 | 10.045 | 43.137 | 1.00 | 26.81 | O   |
| ATOM | 4536 | CB  | LEU | A | 575 | 29.301 | 12.205 | 41.264 | 1.00 | 24.20 | C   |
| ATOM | 4537 | CG  | LEU | A | 575 | 28.778 | 10.958 | 40.541 | 1.00 | 24.99 | C   |
| ATOM | 4538 | CD1 | LEU | A | 575 | 27.265 | 11.091 | 40.260 | 1.00 | 22.96 | C   |
| ATOM | 4539 | CD2 | LEU | A | 575 | 29.587 | 10.746 | 39.253 | 1.00 | 23.54 | C   |
| ATOM | 4540 | N   | VAL | A | 576 | 30.545 | 9.953  | 43.443 | 1.00 | 30.48 | N   |
| ATOM | 4541 | CA  | VAL | A | 576 | 30.594 | 8.583  | 43.980 | 1.00 | 28.40 | C   |
| ATOM | 4542 | C   | VAL | A | 576 | 30.933 | 8.698  | 45.451 | 1.00 | 26.50 | C   |
| ATOM | 4543 | O   | VAL | A | 576 | 30.389 | 7.969  | 46.264 | 1.00 | 26.24 | O   |
| ATOM | 4544 | CB  | VAL | A | 576 | 31.703 | 7.709  | 43.313 | 1.00 | 29.72 | C   |
| ATOM | 4545 | CG1 | VAL | A | 576 | 31.613 | 6.269  | 43.830 | 1.00 | 31.31 | C   |
| ATOM | 4546 | CG2 | VAL | A | 576 | 31.568 | 7.728  | 41.788 | 1.00 | 28.27 | C   |
| ATOM | 4547 | N   | ALA | A | 577 | 31.839 | 9.614  | 45.783 | 1.00 | 26.23 | N   |
| ATOM | 4548 | CA  | ALA | A | 577 | 32.042 | 10.018 | 47.171 | 1.00 | 27.55 | C   |
| ATOM | 4549 | C   | ALA | A | 577 | 30.723 | 10.465 | 47.754 | 1.00 | 27.60 | C   |
| ATOM | 4550 | O   | ALA | A | 577 | 30.498 | 10.341 | 48.959 | 1.00 | 29.06 | O   |
| ATOM | 4551 | CB  | ALA | A | 577 | 33.057 | 11.163 | 47.280 | 1.00 | 24.38 | C   |
| ATOM | 4552 | N   | ALA | A | 578 | 29.896 | 11.084 | 46.921 | 1.00 | 26.48 | N   |
| ATOM | 4553 | CA  | ALA | A | 578 | 28.663 | 11.639 | 47.421 | 1.00 | 28.56 | C   |
| ATOM | 4554 | C   | ALA | A | 578 | 27.604 | 10.545 | 47.504 | 1.00 | 30.37 | C   |
| ATOM | 4555 | O   | ALA | A | 578 | 26.515 | 10.788 | 48.040 | 1.00 | 32.62 | O   |
| ATOM | 4556 | CB  | ALA | A | 578 | 28.198 | 12.775 | 46.522 | 1.00 | 27.95 | C   |
| ATOM | 4557 | N   | SER | A | 579 | 27.969 | 9.336  | 47.045 | 1.00 | 30.43 | N   |
| ATOM | 4558 | CA  | SER | A | 579 | 27.041 | 8.214  | 46.794 | 1.00 | 28.38 | C   |
| ATOM | 4559 | C   | SER | A | 579 | 26.717 | 7.338  | 48.012 | 1.00 | 28.20 | C   |
| ATOM | 4560 | O   | SER | A | 579 | 27.423 | 7.379  | 49.026 | 1.00 | 27.16 | O   |
| ATOM | 4561 | CB  | SER | A | 579 | 27.600 | 7.308  | 45.678 | 1.00 | 26.10 | C   |
| ATOM | 4562 | OG  | SER | A | 579 | 27.127 | 7.695  | 44.407 | 1.00 | 21.67 | O   |
| ATOM | 4563 | N   | GLN | A | 580 | 25.858 | 6.349  | 47.756 | 1.00 | 28.20 | N   |
| ATOM | 4564 | CA  | GLN | A | 580 | 25.294 | 5.456  | 48.775 | 1.00 | 30.20 | C   |
| ATOM | 4565 | C   | GLN | A | 580 | 25.251 | 5.794  | 50.275 | 1.00 | 29.79 | C   |
| ATOM | 4566 | O   | GLN | A | 580 | 24.240 | 6.301  | 50.763 | 1.00 | 29.46 | O   |
| ATOM | 4567 | CB  | GLN | A | 580 | 25.887 | 4.059  | 48.652 | 1.00 | 31.82 | C   |

|         |      |     |     |   |     |         |        |        |      |       |      |   |
|---------|------|-----|-----|---|-----|---------|--------|--------|------|-------|------|---|
| ATOM    | 4568 | CG  | GLN | A | 580 | 24.809  | 3.035  | 48.450 | 1.00 | 35.01 |      | C |
| ATOM    | 4569 | CD  | GLN | A | 580 | 24.605  | 2.755  | 46.984 | 1.00 | 39.20 |      | C |
| ATOM    | 4570 | NE2 | GLN | A | 580 | 24.214  | 3.795  | 46.222 | 1.00 | 39.46 |      | N |
| ATOM    | 4571 | OE1 | GLN | A | 580 | 24.873  | 1.642  | 46.513 | 1.00 | 37.19 |      | O |
| ATOM    | 4572 | N   | ALA | A | 581 | 26.147  | 5.153  | 51.022 | 1.00 | 28.09 |      | N |
| ATOM    | 4573 | CA  | ALA | A | 581 | 25.904  | 4.949  | 52.433 | 1.00 | 28.48 |      | C |
| ATOM    | 4574 | C   | ALA | A | 581 | 26.749  | 5.880  | 53.305 | 1.00 | 31.33 |      | C |
| ATOM    | 4575 | O   | ALA | A | 581 | 27.878  | 5.542  | 53.689 | 1.00 | 33.68 |      | O |
| ATOM    | 4576 | CB  | ALA | A | 581 | 26.139  | 3.517  | 52.786 | 1.00 | 27.41 |      | C |
| ATOM    | 4577 | N   | ALA | A | 582 | 26.292  | 7.133  | 53.354 | 1.00 | 32.13 |      | N |
| ATOM    | 4578 | CA  | ALA | A | 582 | 26.690  | 8.140  | 54.330 | 1.00 | 30.12 |      | C |
| ATOM    | 4579 | C   | ALA | A | 582 | 25.992  | 9.430  | 53.865 | 1.00 | 32.98 |      | C |
| ATOM    | 4580 | O   | ALA | A | 582 | 25.336  | 10.117 | 54.686 | 1.00 | 34.50 |      | O |
| ATOM    | 4581 | CB  | ALA | A | 582 | 28.212  | 8.325  | 54.362 | 1.00 | 23.03 |      | C |
| ATOM    | 4582 | N   | LEU | A | 583 | 26.076  | 9.711  | 52.548 | 1.00 | 32.99 |      | N |
| ATOM    | 4583 | CA  | LEU | A | 583 | 25.497  | 10.927 | 51.932 | 1.00 | 32.69 |      | C |
| ATOM    | 4584 | C   | LEU | A | 583 | 24.530  | 10.469 | 50.841 | 1.00 | 33.35 |      | C |
| ATOM    | 4585 | O   | LEU | A | 583 | 23.484  | 11.124 | 50.604 | 1.00 | 31.85 |      | O |
| ATOM    | 4586 | CB  | LEU | A | 583 | 26.588  | 11.815 | 51.276 | 1.00 | 28.59 |      | C |
| ATOM    | 4587 | CG  | LEU | A | 583 | 27.733  | 12.582 | 51.993 | 1.00 | 26.24 |      | C |
| ATOM    | 4588 | CD1 | LEU | A | 583 | 27.189  | 13.656 | 52.930 | 1.00 | 24.68 |      | C |
| ATOM    | 4589 | CD2 | LEU | A | 583 | 28.651  | 11.626 | 52.741 | 1.00 | 22.20 |      | C |
| HETATM  | 4590 | C   | UNK |   | 0   | -8.743  | 1.026  | 14.253 | 0.00 | 0.00  | .001 | A |
| HETATM  | 4591 | C   | UNK |   | 0   | -9.951  | 1.717  | 14.711 | 0.00 | 0.00  | .029 | A |
| HETATM  | 4592 | C   | UNK |   | 0   | -7.512  | -0.949 | 14.907 | 0.00 | 0.00  | .033 | A |
| HETATM  | 4593 | C   | UNK |   | 0   | -6.608  | -0.707 | 13.898 | 0.00 | 0.00  | .039 | A |
| HETATM  | 4594 | C   | UNK |   | 0   | -8.588  | -0.088 | 15.098 | 0.00 | 0.00  | .043 | A |
| HETATM  | 4595 | C   | UNK |   | 0   | -7.817  | 1.264  | 13.235 | 0.00 | 0.00  | .050 | A |
| HETATM  | 4596 | C   | UNK |   | 0   | -6.759  | 0.395  | 13.059 | 0.00 | 0.00  | .066 | A |
| HETATM  | 4597 | C   | UNK |   | 0   | -10.542 | 2.972  | 14.124 | 0.00 | 0.00  | .070 | C |
| HETATM  | 4598 | N   | UNK |   | 0   | -11.768 | 2.489  | 12.060 | 0.00 | 0.00  | .078 | N |
| HETATM  | 4599 | C   | UNK |   | 0   | -10.433 | 1.018  | 15.751 | 0.00 | 0.00  | .096 | A |
| HETATM  | 4600 | H   | UNK |   | 0   | -9.778  | -0.716 | 16.700 | 0.00 | 0.00  | .165 | H |
| HETATM  | 4601 | H   | UNK |   | 0   | -6.103  | 1.337  | 11.466 | 0.00 | 0.00  | .217 | H |
| HETATM  | 4602 | C   | UNK |   | 0   | -11.908 | 2.656  | 13.513 | 0.00 | 0.00  | .271 | C |
| HETATM  | 4603 | H   | UNK |   | 0   | -10.808 | 2.603  | 11.774 | 0.00 | 0.00  | .312 | H |
| HETATM  | 4604 | H   | UNK |   | 0   | -12.130 | 1.595  | 11.763 | 0.00 | 0.00  | .312 | H |
| HETATM  | 4605 | O   | UNK |   | 0   | -5.857  | 0.620  | 12.066 | 0.00 | 0.00  | .361 | O |
| HETATM  | 4606 | N   | UNK |   | 0   | -9.632  | -0.063 | 15.998 | 0.00 | 0.00  | .365 | N |
| CONNECT | 4590 |     |     |   |     |         |        |        |      |       |      |   |

## ALB\_TRP.pdb

|        |        |        |        |       |        |         |          |      |       |     |
|--------|--------|--------|--------|-------|--------|---------|----------|------|-------|-----|
| CRYST1 | 58.860 | 88.280 | 60.680 | 90.00 | 101.85 | 90.00   | P 1 21 1 | 0    |       |     |
| ATOM   | 1      | N      | LYS A  | 4     | -4.155 | -21.388 | -11.190  | 1.00 | 29.11 | N   |
| ATOM   | 2      | CA     | LYS A  | 4     | -3.964 | -19.918 | -11.113  | 1.00 | 27.16 | C   |
| ATOM   | 3      | C      | LYS A  | 4     | -2.692 | -19.737 | -10.315  | 1.00 | 26.91 | C   |
| ATOM   | 4      | O      | LYS A  | 4     | -2.108 | -20.724 | -9.881   | 1.00 | 25.06 | O   |
| ATOM   | 5      | CB     | LYS A  | 4     | -5.146 | -19.257 | -10.398  | 1.00 | 25.62 | C   |
| ATOM   | 6      | CG     | LYS A  | 4     | -6.503 | -19.517 | -11.051  | 1.00 | 24.88 | C   |
| ATOM   | 7      | CD     | LYS A  | 4     | -7.331 | -18.233 | -11.175  | 1.00 | 26.34 | C   |
| ATOM   | 8      | CE     | LYS A  | 4     | -8.649 | -18.441 | -11.958  | 1.00 | 27.70 | C   |
| ATOM   | 9      | NZ     | LYS A  | 4     | -9.717 | -19.227 | -11.215  | 1.00 | 25.48 | N1+ |
| ATOM   | 10     | N      | SER A  | 5     | -2.168 | -18.518 | -10.290  | 1.00 | 28.23 | N   |
| ATOM   | 11     | CA     | SER A  | 5     | -0.939 | -18.247 | -9.551   | 1.00 | 30.21 | C   |
| ATOM   | 12     | C      | SER A  | 5     | -1.207 | -17.300 | -8.380   | 1.00 | 30.60 | C   |
| ATOM   | 13     | O      | SER A  | 5     | -2.299 | -16.719 | -8.247   | 1.00 | 28.63 | O   |
| ATOM   | 14     | CB     | SER A  | 5     | 0.155  | -17.652 | -10.476  | 1.00 | 30.07 | C   |
| ATOM   | 15     | OG     | SER A  | 5     | 0.110  | -16.225 | -10.543  | 1.00 | 25.84 | O   |
| ATOM   | 16     | N      | GLU A  | 6     | -0.206 | -17.159 | -7.526   | 1.00 | 29.67 | N   |
| ATOM   | 17     | CA     | GLU A  | 6     | -0.250 | -16.146 | -6.511   | 1.00 | 28.73 | C   |
| ATOM   | 18     | C      | GLU A  | 6     | 0.506  | -14.913 | -6.949   | 1.00 | 25.98 | C   |
| ATOM   | 19     | O      | GLU A  | 6     | -0.094 | -13.854 | -7.065   | 1.00 | 25.99 | O   |
| ATOM   | 20     | CB     | GLU A  | 6     | 0.289  | -16.706 | -5.196   | 1.00 | 32.20 | C   |
| ATOM   | 21     | CG     | GLU A  | 6     | -0.730 | -17.561 | -4.457   | 1.00 | 34.86 | C   |
| ATOM   | 22     | CD     | GLU A  | 6     | -2.158 | -17.229 | -4.877   | 1.00 | 37.50 | C   |
| ATOM   | 23     | OE1    | GLU A  | 6     | -2.669 | -16.146 | -4.502   | 1.00 | 36.49 | O   |
| ATOM   | 24     | OE2    | GLU A  | 6     | -2.746 | -18.025 | -5.641   | 1.00 | 41.69 | O1- |
| ATOM   | 25     | N      | VAL A  | 7     | 1.732  | -15.105 | -7.428   | 1.00 | 26.46 | N   |
| ATOM   | 26     | CA     | VAL A  | 7     | 2.660  | -13.992 | -7.658   | 1.00 | 28.01 | C   |
| ATOM   | 27     | C      | VAL A  | 7     | 2.019  | -12.877 | -8.472   | 1.00 | 29.09 | C   |
| ATOM   | 28     | O      | VAL A  | 7     | 1.728  | -11.784 | -7.951   | 1.00 | 28.54 | O   |
| ATOM   | 29     | CB     | VAL A  | 7     | 3.929  | -14.439 | -8.413   | 1.00 | 27.74 | C   |
| ATOM   | 30     | CG1    | VAL A  | 7     | 4.947  | -13.333 | -8.405   | 1.00 | 29.26 | C   |
| ATOM   | 31     | CG2    | VAL A  | 7     | 4.524  | -15.668 | -7.773   | 1.00 | 31.03 | C   |
| ATOM   | 32     | N      | ALA A  | 8     | 1.681  | -13.202 | -9.716   | 1.00 | 29.77 | N   |
| ATOM   | 33     | CA     | ALA A  | 8     | 1.215  | -12.182 | -10.646  | 1.00 | 29.95 | C   |
| ATOM   | 34     | C      | ALA A  | 8     | -0.133 | -11.672 | -10.189  | 1.00 | 29.29 | C   |
| ATOM   | 35     | O      | ALA A  | 8     | -0.491 | -10.525 | -10.473  | 1.00 | 30.27 | O   |
| ATOM   | 36     | CB     | ALA A  | 8     | 1.117  | -12.736 | -12.073  | 1.00 | 29.88 | C   |
| ATOM   | 37     | N      | HIS A  | 9     | -0.866 | -12.500 | -9.452   | 1.00 | 28.46 | N   |
| ATOM   | 38     | CA     | HIS A  | 9     | -2.215 | -12.121 | -9.052   | 1.00 | 28.28 | C   |
| ATOM   | 39     | C      | HIS A  | 9     | -2.121 | -10.972 | -8.070   | 1.00 | 28.15 | C   |
| ATOM   | 40     | O      | HIS A  | 9     | -2.926 | -10.045 | -8.124   | 1.00 | 28.25 | O   |
| ATOM   | 41     | CB     | HIS A  | 9     | -2.961 | -13.275 | -8.387   | 1.00 | 26.15 | C   |
| ATOM   | 42     | CG     | HIS A  | 9     | -4.260 | -12.866 | -7.776   | 1.00 | 23.88 | C   |
| ATOM   | 43     | CD2    | HIS A  | 9     | -5.086 | -11.821 | -8.052   | 1.00 | 22.55 | C   |
| ATOM   | 44     | ND1    | HIS A  | 9     | -4.868 | -13.577 | -6.766   | 1.00 | 22.06 | N   |
| ATOM   | 45     | CE1    | HIS A  | 9     | -6.009 | -12.994 | -6.443   | 1.00 | 23.71 | C   |
| ATOM   | 46     | NE2    | HIS A  | 9     | -6.162 | -11.927 | -7.212   | 1.00 | 25.62 | N   |
| ATOM   | 47     | N      | ARG A  | 10    | -1.181 | -11.070 | -7.134   | 1.00 | 26.61 | N   |
| ATOM   | 48     | CA     | ARG A  | 10    | -0.934 | -9.977  | -6.211   | 1.00 | 26.64 | C   |
| ATOM   | 49     | C      | ARG A  | 10    | -0.481 | -8.776  | -7.042   | 1.00 | 26.73 | C   |
| ATOM   | 50     | O      | ARG A  | 10    | -1.080 | -7.701  | -6.952   | 1.00 | 26.46 | O   |
| ATOM   | 51     | CB     | ARG A  | 10    | 0.123  | -10.384 | -5.179   | 1.00 | 25.45 | C   |
| ATOM   | 52     | CG     | ARG A  | 10    | -0.411 | -11.233 | -3.973   | 1.00 | 26.28 | C   |
| ATOM   | 53     | CD     | ARG A  | 10    | -1.808 | -11.885 | -4.176   | 1.00 | 22.90 | C   |
| ATOM   | 54     | NE     | ARG A  | 10    | -2.565 | -11.999 | -2.920   | 1.00 | 22.44 | N   |
| ATOM   | 55     | CZ     | ARG A  | 10    | -3.843 | -12.387 | -2.815   | 1.00 | 23.29 | C   |
| ATOM   | 56     | NH1    | ARG A  | 10    | -4.491 | -12.934 | -3.836   | 1.00 | 20.37 | N1+ |
| ATOM   | 57     | NH2    | ARG A  | 10    | -4.460 | -12.295 | -1.650   | 1.00 | 22.05 | N   |
| ATOM   | 58     | N      | PHE A  | 11    | 0.332  | -9.061  | -8.061   | 1.00 | 27.91 | N   |
| ATOM   | 59     | CA     | PHE A  | 11    | 0.735  | -8.053  | -9.045   | 1.00 | 25.84 | C   |
| ATOM   | 60     | C      | PHE A  | 11    | -0.452 | -7.383  | -9.727   | 1.00 | 24.74 | C   |
| ATOM   | 61     | O      | PHE A  | 11    | -0.444 | -6.168  | -9.938   | 1.00 | 25.29 | O   |
| ATOM   | 62     | CB     | PHE A  | 11    | 1.652  | -8.664  | -10.105  | 1.00 | 24.40 | C   |
| ATOM   | 63     | CG     | PHE A  | 11    | 2.851  | -7.809  | -10.430  | 1.00 | 27.14 | C   |
| ATOM   | 64     | CD1    | PHE A  | 11    | 2.762  | -6.785  | -11.368  | 1.00 | 26.91 | C   |
| ATOM   | 65     | CD2    | PHE A  | 11    | 4.042  | -7.965  | -9.728   | 1.00 | 26.00 | C   |
| ATOM   | 66     | CE1    | PHE A  | 11    | 3.829  | -5.934  | -11.585  | 1.00 | 27.01 | C   |
| ATOM   | 67     | CE2    | PHE A  | 11    | 5.115  | -7.111  | -9.945   | 1.00 | 25.82 | C   |
| ATOM   | 68     | CZ     | PHE A  | 11    | 5.009  | -6.095  | -10.871  | 1.00 | 25.28 | C   |

|      |     |     |     |   |    |        |         |         |      |       |     |
|------|-----|-----|-----|---|----|--------|---------|---------|------|-------|-----|
| ATOM | 69  | N   | LYS | A | 12 | -1.530 | -8.136  | -9.903  | 1.00 | 23.91 | N   |
| ATOM | 70  | CA  | LYS | A | 12 | -2.692 | -7.668  | -10.651 | 1.00 | 22.95 | C   |
| ATOM | 71  | C   | LYS | A | 12 | -3.685 | -6.841  | -9.819  | 1.00 | 22.94 | C   |
| ATOM | 72  | O   | LYS | A | 12 | -4.825 | -6.624  | -10.255 | 1.00 | 22.98 | O   |
| ATOM | 73  | CB  | LYS | A | 12 | -3.449 | -8.860  | -11.267 | 1.00 | 23.41 | C   |
| ATOM | 74  | CG  | LYS | A | 12 | -2.859 | -9.489  | -12.523 | 1.00 | 18.48 | C   |
| ATOM | 75  | CD  | LYS | A | 12 | -3.793 | -10.579 | -13.069 | 1.00 | 15.47 | C   |
| ATOM | 76  | CE  | LYS | A | 12 | -3.024 | -11.641 | -13.836 | 1.00 | 13.47 | C   |
| ATOM | 77  | NZ  | LYS | A | 12 | -2.824 | -11.308 | -15.273 | 1.00 | 12.20 | N1+ |
| ATOM | 78  | N   | ASP | A | 13 | -3.313 | -6.444  | -8.606  | 1.00 | 22.30 | N   |
| ATOM | 79  | CA  | ASP | A | 13 | -4.140 | -5.462  | -7.897  | 1.00 | 22.25 | C   |
| ATOM | 80  | C   | ASP | A | 13 | -3.358 | -4.266  | -7.363  | 1.00 | 20.77 | C   |
| ATOM | 81  | O   | ASP | A | 13 | -3.612 | -3.114  | -7.758  | 1.00 | 18.06 | O   |
| ATOM | 82  | CB  | ASP | A | 13 | -4.929 | -6.102  | -6.748  | 1.00 | 27.23 | C   |
| ATOM | 83  | CG  | ASP | A | 13 | -4.846 | -7.609  | -6.734  | 1.00 | 30.68 | C   |
| ATOM | 84  | OD1 | ASP | A | 13 | -3.712 | -8.130  | -6.758  | 1.00 | 31.81 | O   |
| ATOM | 85  | OD2 | ASP | A | 13 | -5.905 | -8.262  | -6.569  | 1.00 | 31.63 | O1- |
| ATOM | 86  | N   | LEU | A | 14 | -2.360 | -4.555  | -6.527  | 1.00 | 19.90 | N   |
| ATOM | 87  | CA  | LEU | A | 14 | -1.567 | -3.530  | -5.840  | 1.00 | 19.12 | C   |
| ATOM | 88  | C   | LEU | A | 14 | -0.542 | -2.906  | -6.802  | 1.00 | 21.59 | C   |
| ATOM | 89  | O   | LEU | A | 14 | 0.414  | -2.214  | -6.388  | 1.00 | 20.70 | O   |
| ATOM | 90  | CB  | LEU | A | 14 | -0.867 | -4.154  | -4.625  | 1.00 | 16.73 | C   |
| ATOM | 91  | CG  | LEU | A | 14 | 0.256  | -5.186  | -4.824  | 1.00 | 15.13 | C   |
| ATOM | 92  | CD1 | LEU | A | 14 | 1.447  | -4.781  | -3.981  | 1.00 | 11.65 | C   |
| ATOM | 93  | CD2 | LEU | A | 14 | -0.189 | -6.568  | -4.441  | 1.00 | 11.37 | C   |
| ATOM | 94  | N   | GLY | A | 15 | -0.829 | -3.065  | -8.092  | 1.00 | 21.89 | N   |
| ATOM | 95  | CA  | GLY | A | 15 | 0.087  | -2.683  | -9.140  | 1.00 | 23.39 | C   |
| ATOM | 96  | C   | GLY | A | 15 | 1.491  | -3.220  | -8.965  | 1.00 | 24.62 | C   |
| ATOM | 97  | O   | GLY | A | 15 | 1.700  | -4.264  | -8.353  | 1.00 | 23.01 | O   |
| ATOM | 98  | N   | GLU | A | 16 | 2.457  | -2.395  | -9.367  | 1.00 | 26.22 | N   |
| ATOM | 99  | CA  | GLU | A | 16 | 3.837  | -2.809  | -9.504  | 1.00 | 25.91 | C   |
| ATOM | 100 | C   | GLU | A | 16 | 4.725  | -2.038  | -8.535  | 1.00 | 27.19 | C   |
| ATOM | 101 | O   | GLU | A | 16 | 5.421  | -2.680  | -7.760  | 1.00 | 26.80 | O   |
| ATOM | 102 | CB  | GLU | A | 16 | 4.282  | -2.641  | -10.966 | 1.00 | 27.05 | C   |
| ATOM | 103 | CG  | GLU | A | 16 | 5.730  | -2.204  | -11.175 | 1.00 | 28.89 | C   |
| ATOM | 104 | CD  | GLU | A | 16 | 6.302  | -2.613  | -12.537 | 1.00 | 29.95 | C   |
| ATOM | 105 | OE1 | GLU | A | 16 | 5.637  | -2.398  | -13.596 | 1.00 | 28.27 | O   |
| ATOM | 106 | OE2 | GLU | A | 16 | 7.444  | -3.137  | -12.531 | 1.00 | 28.17 | O1- |
| ATOM | 107 | N   | GLU | A | 17 | 4.596  | -0.699  | -8.451  | 1.00 | 30.38 | N   |
| ATOM | 108 | CA  | GLU | A | 17 | 5.444  | 0.099   | -7.520  | 1.00 | 30.91 | C   |
| ATOM | 109 | C   | GLU | A | 17 | 5.306  | -0.525  | -6.158  | 1.00 | 32.10 | C   |
| ATOM | 110 | O   | GLU | A | 17 | 6.187  | -1.268  | -5.730  | 1.00 | 34.11 | O   |
| ATOM | 111 | CB  | GLU | A | 17 | 5.044  | 1.589   | -7.404  | 1.00 | 28.23 | C   |
| ATOM | 112 | CG  | GLU | A | 17 | 6.165  | 2.451   | -6.706  | 1.00 | 30.17 | C   |
| ATOM | 113 | CD  | GLU | A | 17 | 5.688  | 3.762   | -5.967  | 1.00 | 32.12 | C   |
| ATOM | 114 | OE1 | GLU | A | 17 | 5.082  | 4.666   | -6.598  | 1.00 | 30.67 | O   |
| ATOM | 115 | OE2 | GLU | A | 17 | 6.027  | 3.939   | -4.760  | 1.00 | 31.49 | O1- |
| ATOM | 116 | N   | ASN | A | 18 | 4.054  | -0.563  | -5.720  | 1.00 | 33.09 | N   |
| ATOM | 117 | CA  | ASN | A | 18 | 3.696  | -1.121  | -4.420  | 1.00 | 32.50 | C   |
| ATOM | 118 | C   | ASN | A | 18 | 3.913  | -2.668  | -4.325  | 1.00 | 31.11 | C   |
| ATOM | 119 | O   | ASN | A | 18 | 3.947  | -3.231  | -3.212  | 1.00 | 30.55 | O   |
| ATOM | 120 | CB  | ASN | A | 18 | 2.249  | -0.690  | -4.057  | 1.00 | 31.08 | C   |
| ATOM | 121 | CG  | ASN | A | 18 | 2.086  | 0.851   | -3.988  | 1.00 | 28.14 | C   |
| ATOM | 122 | ND2 | ASN | A | 18 | 0.918  | 1.344   | -4.361  | 1.00 | 28.12 | N   |
| ATOM | 123 | OD1 | ASN | A | 18 | 3.018  | 1.572   | -3.648  | 1.00 | 24.14 | O   |
| ATOM | 124 | N   | PHE | A | 19 | 4.287  | -3.307  | -5.437  | 1.00 | 27.36 | N   |
| ATOM | 125 | CA  | PHE | A | 19 | 4.761  | -4.691  | -5.361  | 1.00 | 25.30 | C   |
| ATOM | 126 | C   | PHE | A | 19 | 6.240  | -4.636  | -5.071  | 1.00 | 25.50 | C   |
| ATOM | 127 | O   | PHE | A | 19 | 6.703  | -5.188  | -4.078  | 1.00 | 26.44 | O   |
| ATOM | 128 | CB  | PHE | A | 19 | 4.513  | -5.455  | -6.667  | 1.00 | 24.34 | C   |
| ATOM | 129 | CG  | PHE | A | 19 | 4.448  | -6.959  | -6.504  | 1.00 | 21.73 | C   |
| ATOM | 130 | CD1 | PHE | A | 19 | 5.594  | -7.720  | -6.488  | 1.00 | 21.65 | C   |
| ATOM | 131 | CD2 | PHE | A | 19 | 3.236  | -7.616  | -6.507  | 1.00 | 21.52 | C   |
| ATOM | 132 | CE1 | PHE | A | 19 | 5.532  | -9.106  | -6.486  | 1.00 | 18.58 | C   |
| ATOM | 133 | CE2 | PHE | A | 19 | 3.175  | -8.997  | -6.508  | 1.00 | 20.40 | C   |
| ATOM | 134 | CZ  | PHE | A | 19 | 4.328  | -9.738  | -6.499  | 1.00 | 18.31 | C   |
| ATOM | 135 | N   | LYS | A | 20 | 6.957  | -3.831  | -5.839  | 1.00 | 24.36 | N   |
| ATOM | 136 | CA  | LYS | A | 20 | 8.340  | -3.545  | -5.501  | 1.00 | 26.07 | C   |
| ATOM | 137 | C   | LYS | A | 20 | 8.335  | -3.055  | -4.053  | 1.00 | 26.27 | C   |
| ATOM | 138 | O   | LYS | A | 20 | 9.090  | -3.567  | -3.221  | 1.00 | 25.42 | O   |
| ATOM | 139 | CB  | LYS | A | 20 | 8.921  | -2.458  | -6.432  | 1.00 | 27.79 | C   |

|      |     |     |     |   |    |        |         |        |      |       |     |
|------|-----|-----|-----|---|----|--------|---------|--------|------|-------|-----|
| ATOM | 140 | CG  | LYS | A | 20 | 9.948  | -2.952  | -7.490 | 1.00 | 26.76 | C   |
| ATOM | 141 | CD  | LYS | A | 20 | 9.952  | -2.041  | -8.743 | 1.00 | 22.31 | C   |
| ATOM | 142 | CE  | LYS | A | 20 | 10.898 | -2.548  | -9.824 | 1.00 | 20.10 | C   |
| ATOM | 143 | NZ  | LYS | A | 20 | 12.337 | -2.566  | -9.387 | 1.00 | 19.71 | N1+ |
| ATOM | 144 | N   | ALA | A | 21 | 7.287  | -2.301  | -3.711 | 1.00 | 26.57 | N   |
| ATOM | 145 | CA  | ALA | A | 21 | 7.264  | -1.504  | -2.480 | 1.00 | 25.54 | C   |
| ATOM | 146 | C   | ALA | A | 21 | 7.045  | -2.381  | -1.289 | 1.00 | 23.24 | C   |
| ATOM | 147 | O   | ALA | A | 21 | 7.661  | -2.178  | -0.261 | 1.00 | 24.58 | O   |
| ATOM | 148 | CB  | ALA | A | 21 | 6.188  | -0.411  | -2.539 | 1.00 | 24.10 | C   |
| ATOM | 149 | N   | LEU | A | 22 | 6.251  | -3.422  | -1.444 | 1.00 | 22.80 | N   |
| ATOM | 150 | CA  | LEU | A | 22 | 6.151  | -4.371  | -0.353 | 1.00 | 23.66 | C   |
| ATOM | 151 | C   | LEU | A | 22 | 7.414  | -5.226  | -0.300 | 1.00 | 22.00 | C   |
| ATOM | 152 | O   | LEU | A | 22 | 8.277  | -4.987  | 0.543  | 1.00 | 22.37 | O   |
| ATOM | 153 | CB  | LEU | A | 22 | 4.892  | -5.242  | -0.489 | 1.00 | 25.44 | C   |
| ATOM | 154 | CG  | LEU | A | 22 | 3.648  | -4.849  | 0.324  | 1.00 | 23.88 | C   |
| ATOM | 155 | CD1 | LEU | A | 22 | 4.053  | -4.132  | 1.586  | 1.00 | 21.55 | C   |
| ATOM | 156 | CD2 | LEU | A | 22 | 2.740  | -3.964  | -0.500 | 1.00 | 23.25 | C   |
| ATOM | 157 | N   | VAL | A | 23 | 7.649  | -5.965  | -1.382 | 1.00 | 19.37 | N   |
| ATOM | 158 | CA  | VAL | A | 23 | 8.590  | -7.075  | -1.410 | 1.00 | 16.76 | C   |
| ATOM | 159 | C   | VAL | A | 23 | 10.018 | -6.698  | -0.945 | 1.00 | 18.40 | C   |
| ATOM | 160 | O   | VAL | A | 23 | 10.734 | -7.519  | -0.372 | 1.00 | 17.50 | O   |
| ATOM | 161 | CB  | VAL | A | 23 | 8.579  | -7.698  | -2.823 | 1.00 | 15.62 | C   |
| ATOM | 162 | CG1 | VAL | A | 23 | 9.429  | -8.950  | -2.878 | 1.00 | 13.90 | C   |
| ATOM | 163 | CG2 | VAL | A | 23 | 7.157  | -8.040  | -3.211 | 1.00 | 9.89  | C   |
| ATOM | 164 | N   | LEU | A | 24 | 10.336 | -5.412  | -0.999 | 1.00 | 20.80 | N   |
| ATOM | 165 | CA  | LEU | A | 24 | 11.503 | -4.879  | -0.319 | 1.00 | 21.23 | C   |
| ATOM | 166 | C   | LEU | A | 24 | 11.278 | -4.949  | 1.182  | 1.00 | 22.45 | C   |
| ATOM | 167 | O   | LEU | A | 24 | 11.885 | -5.812  | 1.826  | 1.00 | 25.32 | O   |
| ATOM | 168 | CB  | LEU | A | 24 | 11.767 | -3.434  | -0.729 | 1.00 | 23.94 | C   |
| ATOM | 169 | CG  | LEU | A | 24 | 13.205 | -2.910  | -0.666 | 1.00 | 25.01 | C   |
| ATOM | 170 | CD1 | LEU | A | 24 | 13.154 | -1.397  | -0.414 | 1.00 | 24.47 | C   |
| ATOM | 171 | CD2 | LEU | A | 24 | 14.017 | -3.618  | 0.417  | 1.00 | 24.82 | C   |
| ATOM | 172 | N   | ILE | A | 25 | 10.410 | -4.100  | 1.756  | 1.00 | 21.80 | N   |
| ATOM | 173 | CA  | ILE | A | 25 | 10.241 | -4.122  | 3.238  | 1.00 | 22.89 | C   |
| ATOM | 174 | C   | ILE | A | 25 | 10.125 | -5.571  | 3.747  | 1.00 | 23.14 | C   |
| ATOM | 175 | O   | ILE | A | 25 | 10.935 | -5.997  | 4.564  | 1.00 | 20.48 | O   |
| ATOM | 176 | CB  | ILE | A | 25 | 8.993  | -3.319  | 3.785  | 1.00 | 19.69 | C   |
| ATOM | 177 | CG1 | ILE | A | 25 | 7.714  | -3.751  | 3.081  | 1.00 | 18.78 | C   |
| ATOM | 178 | CG2 | ILE | A | 25 | 9.220  | -1.841  | 3.691  | 1.00 | 14.48 | C   |
| ATOM | 179 | CD1 | ILE | A | 25 | 6.793  | -2.619  | 2.745  | 1.00 | 19.12 | C   |
| ATOM | 180 | N   | ALA | A | 26 | 9.289  | -6.364  | 3.071  | 1.00 | 23.61 | N   |
| ATOM | 181 | CA  | ALA | A | 26 | 9.182  | -7.799  | 3.320  | 1.00 | 24.15 | C   |
| ATOM | 182 | C   | ALA | A | 26 | 10.563 | -8.405  | 3.520  | 1.00 | 24.53 | C   |
| ATOM | 183 | O   | ALA | A | 26 | 10.954 | -8.689  | 4.649  | 1.00 | 24.25 | O   |
| ATOM | 184 | CB  | ALA | A | 26 | 8.475  | -8.487  | 2.149  | 1.00 | 23.75 | C   |
| ATOM | 185 | N   | PHE | A | 27 | 11.367 | -8.391  | 2.458  | 1.00 | 25.34 | N   |
| ATOM | 186 | CA  | PHE | A | 27 | 12.700 | -8.999  | 2.472  | 1.00 | 23.54 | C   |
| ATOM | 187 | C   | PHE | A | 27 | 13.657 | -8.301  | 3.432  | 1.00 | 21.84 | C   |
| ATOM | 188 | O   | PHE | A | 27 | 14.755 | -8.811  | 3.685  | 1.00 | 21.92 | O   |
| ATOM | 189 | CB  | PHE | A | 27 | 13.312 | -8.985  | 1.067  | 1.00 | 22.66 | C   |
| ATOM | 190 | CG  | PHE | A | 27 | 12.781 | -10.058 | 0.157  | 1.00 | 21.80 | C   |
| ATOM | 191 | CD1 | PHE | A | 27 | 12.742 | -11.375 | 0.562  | 1.00 | 22.31 | C   |
| ATOM | 192 | CD2 | PHE | A | 27 | 12.383 | -9.753  | -1.130 | 1.00 | 19.87 | C   |
| ATOM | 193 | CE1 | PHE | A | 27 | 12.309 | -12.365 | -0.311 | 1.00 | 23.11 | C   |
| ATOM | 194 | CE2 | PHE | A | 27 | 11.955 | -10.733 | -1.999 | 1.00 | 17.81 | C   |
| ATOM | 195 | CZ  | PHE | A | 27 | 11.914 | -12.034 | -1.595 | 1.00 | 20.05 | C   |
| ATOM | 196 | N   | ALA | A | 28 | 13.258 | -7.145  | 3.956  | 1.00 | 19.72 | N   |
| ATOM | 197 | CA  | ALA | A | 28 | 14.162 | -6.345  | 4.775  | 1.00 | 20.10 | C   |
| ATOM | 198 | C   | ALA | A | 28 | 13.699 | -5.958  | 6.201  | 1.00 | 21.53 | C   |
| ATOM | 199 | O   | ALA | A | 28 | 14.345 | -5.141  | 6.856  | 1.00 | 21.18 | O   |
| ATOM | 200 | CB  | ALA | A | 28 | 14.589 | -5.111  | 4.002  | 1.00 | 19.50 | C   |
| ATOM | 201 | N   | GLN | A | 29 | 12.557 | -6.484  | 6.644  | 1.00 | 22.14 | N   |
| ATOM | 202 | CA  | GLN | A | 29 | 12.293 | -6.695  | 8.068  | 1.00 | 19.68 | C   |
| ATOM | 203 | C   | GLN | A | 29 | 12.975 | -8.025  | 8.333  | 1.00 | 22.08 | C   |
| ATOM | 204 | O   | GLN | A | 29 | 13.984 | -8.084  | 9.029  | 1.00 | 21.67 | O   |
| ATOM | 205 | CB  | GLN | A | 29 | 10.785 | -6.840  | 8.336  | 1.00 | 15.49 | C   |
| ATOM | 206 | CG  | GLN | A | 29 | 9.953  | -5.582  | 8.068  | 1.00 | 16.39 | C   |
| ATOM | 207 | CD  | GLN | A | 29 | 8.445  | -5.805  | 8.202  | 1.00 | 17.09 | C   |
| ATOM | 208 | NE2 | GLN | A | 29 | 7.699  | -4.724  | 8.411  | 1.00 | 12.64 | N   |
| ATOM | 209 | OE1 | GLN | A | 29 | 7.959  | -6.934  | 8.092  | 1.00 | 19.84 | O   |
| ATOM | 210 | N   | TYR | A | 30 | 12.622 | -8.974  | 7.462  | 1.00 | 24.94 | N   |

|      |     |     |     |   |    |        |         |        |      |       |     |
|------|-----|-----|-----|---|----|--------|---------|--------|------|-------|-----|
| ATOM | 211 | CA  | TYR | A | 30 | 13.071 | -10.369 | 7.483  | 1.00 | 23.92 | C   |
| ATOM | 212 | C   | TYR | A | 30 | 14.537 | -10.604 | 7.852  | 1.00 | 24.37 | C   |
| ATOM | 213 | O   | TYR | A | 30 | 14.813 | -11.198 | 8.911  | 1.00 | 26.54 | O   |
| ATOM | 214 | CB  | TYR | A | 30 | 12.785 | -11.008 | 6.129  | 1.00 | 22.66 | C   |
| ATOM | 215 | CG  | TYR | A | 30 | 11.456 | -11.702 | 6.058  | 1.00 | 24.59 | C   |
| ATOM | 216 | CD1 | TYR | A | 30 | 11.236 | -12.867 | 6.775  | 1.00 | 26.93 | C   |
| ATOM | 217 | CD2 | TYR | A | 30 | 10.448 | -11.251 | 5.218  | 1.00 | 25.02 | C   |
| ATOM | 218 | CE1 | TYR | A | 30 | 10.052 | -13.584 | 6.651  | 1.00 | 27.16 | C   |
| ATOM | 219 | CE2 | TYR | A | 30 | 9.253  | -11.953 | 5.082  | 1.00 | 26.54 | C   |
| ATOM | 220 | CZ  | TYR | A | 30 | 9.068  | -13.128 | 5.798  | 1.00 | 27.87 | C   |
| ATOM | 221 | OH  | TYR | A | 30 | 7.931  | -13.888 | 5.629  | 1.00 | 28.25 | O   |
| ATOM | 222 | N   | LEU | A | 31 | 15.469 | -10.188 | 6.982  | 1.00 | 19.65 | N   |
| ATOM | 223 | CA  | LEU | A | 31 | 16.893 | -10.427 | 7.227  | 1.00 | 16.82 | C   |
| ATOM | 224 | C   | LEU | A | 31 | 17.698 | -9.262  | 7.838  | 1.00 | 16.70 | C   |
| ATOM | 225 | O   | LEU | A | 31 | 18.814 | -9.467  | 8.332  | 1.00 | 16.93 | O   |
| ATOM | 226 | CB  | LEU | A | 31 | 17.569 | -10.920 | 5.949  | 1.00 | 18.70 | C   |
| ATOM | 227 | CG  | LEU | A | 31 | 17.564 | -12.423 | 5.628  | 1.00 | 18.34 | C   |
| ATOM | 228 | CD1 | LEU | A | 31 | 18.751 | -12.798 | 4.728  | 1.00 | 16.70 | C   |
| ATOM | 229 | CD2 | LEU | A | 31 | 17.629 | -13.188 | 6.913  | 1.00 | 17.85 | C   |
| ATOM | 230 | N   | GLN | A | 32 | 17.196 | -8.040  | 7.703  | 1.00 | 12.99 | N   |
| ATOM | 231 | CA  | GLN | A | 32 | 17.563 | -6.922  | 8.579  | 1.00 | 15.39 | C   |
| ATOM | 232 | C   | GLN | A | 32 | 19.015 | -6.620  | 9.024  | 1.00 | 16.50 | C   |
| ATOM | 233 | O   | GLN | A | 32 | 19.233 | -5.706  | 9.832  | 1.00 | 16.68 | O   |
| ATOM | 234 | CB  | GLN | A | 32 | 16.647 | -6.914  | 9.830  | 1.00 | 17.32 | C   |
| ATOM | 235 | CG  | GLN | A | 32 | 16.825 | -8.056  | 10.882 | 1.00 | 18.77 | C   |
| ATOM | 236 | CD  | GLN | A | 32 | 16.438 | -7.610  | 12.302 | 1.00 | 19.47 | C   |
| ATOM | 237 | NE2 | GLN | A | 32 | 17.197 | -8.054  | 13.301 | 1.00 | 11.37 | N   |
| ATOM | 238 | OE1 | GLN | A | 32 | 15.564 | -6.759  | 12.468 | 1.00 | 21.08 | O   |
| ATOM | 239 | N   | GLN | A | 33 | 20.018 | -7.295  | 8.474  | 1.00 | 17.10 | N   |
| ATOM | 240 | CA  | GLN | A | 33 | 21.399 | -6.839  | 8.685  | 1.00 | 18.29 | C   |
| ATOM | 241 | C   | GLN | A | 33 | 22.190 | -6.783  | 7.353  | 1.00 | 19.96 | C   |
| ATOM | 242 | O   | GLN | A | 33 | 22.912 | -5.816  | 7.095  | 1.00 | 20.35 | O   |
| ATOM | 243 | CB  | GLN | A | 33 | 22.119 | -7.705  | 9.752  | 1.00 | 16.98 | C   |
| ATOM | 244 | CG  | GLN | A | 33 | 21.184 | -8.265  | 10.879 | 1.00 | 21.56 | C   |
| ATOM | 245 | CD  | GLN | A | 33 | 21.643 | -7.989  | 12.350 | 1.00 | 23.80 | C   |
| ATOM | 246 | NE2 | GLN | A | 33 | 22.932 | -7.685  | 12.533 | 1.00 | 26.50 | N   |
| ATOM | 247 | OE1 | GLN | A | 33 | 20.834 | -8.040  | 13.295 | 1.00 | 19.44 | O   |
| ATOM | 248 | N   | CYS | A | 34 | 21.943 | -7.745  | 6.458  | 1.00 | 20.58 | N   |
| ATOM | 249 | CA  | CYS | A | 34 | 22.517 | -7.742  | 5.113  | 1.00 | 18.89 | C   |
| ATOM | 250 | C   | CYS | A | 34 | 22.254 | -6.421  | 4.403  | 1.00 | 20.26 | C   |
| ATOM | 251 | O   | CYS | A | 34 | 21.094 | -5.970  | 4.313  | 1.00 | 18.49 | O   |
| ATOM | 252 | CB  | CYS | A | 34 | 21.906 | -8.857  | 4.277  | 1.00 | 17.31 | C   |
| ATOM | 253 | SG  | CYS | A | 34 | 22.155 | -10.502 | 4.964  | 1.00 | 28.19 | S   |
| ATOM | 254 | N   | PRO | A | 35 | 23.309 | -5.836  | 3.795  | 1.00 | 19.86 | N   |
| ATOM | 255 | CA  | PRO | A | 35 | 23.265 | -4.593  | 3.019  | 1.00 | 16.08 | C   |
| ATOM | 256 | C   | PRO | A | 35 | 22.189 | -4.451  | 1.981  | 1.00 | 13.85 | C   |
| ATOM | 257 | O   | PRO | A | 35 | 21.368 | -5.324  | 1.779  | 1.00 | 11.96 | O   |
| ATOM | 258 | CB  | PRO | A | 35 | 24.648 | -4.512  | 2.420  | 1.00 | 14.75 | C   |
| ATOM | 259 | CG  | PRO | A | 35 | 25.491 | -4.991  | 3.508  | 1.00 | 21.60 | C   |
| ATOM | 260 | CD  | PRO | A | 35 | 24.692 | -6.116  | 4.215  | 1.00 | 21.49 | C   |
| ATOM | 261 | N   | PHE | A | 36 | 22.110 | -3.257  | 1.430  | 1.00 | 16.85 | N   |
| ATOM | 262 | CA  | PHE | A | 36 | 20.988 | -2.926  | 0.602  | 1.00 | 17.73 | C   |
| ATOM | 263 | C   | PHE | A | 36 | 20.944 | -3.782  | -0.646 | 1.00 | 20.98 | C   |
| ATOM | 264 | O   | PHE | A | 36 | 20.009 | -4.576  | -0.789 | 1.00 | 24.39 | O   |
| ATOM | 265 | CB  | PHE | A | 36 | 20.979 | -1.443  | 0.233  | 1.00 | 18.53 | C   |
| ATOM | 266 | CG  | PHE | A | 36 | 19.674 | -0.996  | -0.359 | 1.00 | 19.96 | C   |
| ATOM | 267 | CD1 | PHE | A | 36 | 18.482 | -1.376  | 0.223  | 1.00 | 18.68 | C   |
| ATOM | 268 | CD2 | PHE | A | 36 | 19.632 | -0.366  | -1.579 | 1.00 | 20.99 | C   |
| ATOM | 269 | CE1 | PHE | A | 36 | 17.308 | -1.164  | -0.391 | 1.00 | 17.22 | C   |
| ATOM | 270 | CE2 | PHE | A | 36 | 18.443 | -0.149  | -2.195 | 1.00 | 19.46 | C   |
| ATOM | 271 | CZ  | PHE | A | 36 | 17.282 | -0.559  | -1.600 | 1.00 | 19.20 | C   |
| ATOM | 272 | N   | GLU | A | 37 | 21.990 | -3.721  | -1.482 | 1.00 | 21.10 | N   |
| ATOM | 273 | CA  | GLU | A | 37 | 21.895 | -4.190  | -2.874 | 1.00 | 20.88 | C   |
| ATOM | 274 | C   | GLU | A | 37 | 21.529 | -5.668  | -3.024 | 1.00 | 20.33 | C   |
| ATOM | 275 | O   | GLU | A | 37 | 20.863 | -6.060  | -3.979 | 1.00 | 18.29 | O   |
| ATOM | 276 | CB  | GLU | A | 37 | 23.192 | -3.914  | -3.617 | 1.00 | 22.94 | C   |
| ATOM | 277 | CG  | GLU | A | 37 | 23.564 | -2.453  | -3.675 | 1.00 | 24.70 | C   |
| ATOM | 278 | CD  | GLU | A | 37 | 24.725 | -2.103  | -2.759 | 1.00 | 27.37 | C   |
| ATOM | 279 | OE1 | GLU | A | 37 | 25.368 | -3.042  | -2.215 | 1.00 | 26.97 | O   |
| ATOM | 280 | OE2 | GLU | A | 37 | 24.966 | -0.880  | -2.567 | 1.00 | 25.74 | O1- |
| ATOM | 281 | N   | ASP | A | 38 | 22.115 | -6.488  | -2.161 | 1.00 | 20.03 | N   |

|      |     |     |     |   |    |        |         |         |      |       |     |
|------|-----|-----|-----|---|----|--------|---------|---------|------|-------|-----|
| ATOM | 282 | CA  | ASP | A | 38 | 21.747 | -7.891  | -1.979  | 1.00 | 18.25 | C   |
| ATOM | 283 | C   | ASP | A | 38 | 20.224 | -8.028  | -1.946  | 1.00 | 20.19 | C   |
| ATOM | 284 | O   | ASP | A | 38 | 19.615 | -8.679  | -2.800  | 1.00 | 17.87 | O   |
| ATOM | 285 | CB  | ASP | A | 38 | 22.348 | -8.378  | -0.663  | 1.00 | 16.94 | C   |
| ATOM | 286 | CG  | ASP | A | 38 | 23.796 | -7.902  | -0.463  | 1.00 | 18.58 | C   |
| ATOM | 287 | OD1 | ASP | A | 38 | 24.047 | -6.683  | -0.383  | 1.00 | 14.38 | O   |
| ATOM | 288 | OD2 | ASP | A | 38 | 24.696 | -8.758  | -0.380  | 1.00 | 22.12 | O1- |
| ATOM | 289 | N   | HIS | A | 39 | 19.612 | -7.271  | -1.038  | 1.00 | 23.52 | N   |
| ATOM | 290 | CA  | HIS | A | 39 | 18.160 | -7.214  | -0.882  | 1.00 | 22.04 | C   |
| ATOM | 291 | C   | HIS | A | 39 | 17.507 | -6.768  | -2.173  | 1.00 | 20.54 | C   |
| ATOM | 292 | O   | HIS | A | 39 | 16.482 | -7.318  | -2.558  | 1.00 | 21.75 | O   |
| ATOM | 293 | CB  | HIS | A | 39 | 17.765 | -6.228  | 0.235   | 1.00 | 22.52 | C   |
| ATOM | 294 | CG  | HIS | A | 39 | 17.962 | -6.765  | 1.616   | 1.00 | 21.90 | C   |
| ATOM | 295 | CD2 | HIS | A | 39 | 17.572 | -7.930  | 2.183   | 1.00 | 22.42 | C   |
| ATOM | 296 | ND1 | HIS | A | 39 | 18.606 | -6.054  | 2.609   | 1.00 | 23.78 | N   |
| ATOM | 297 | CE1 | HIS | A | 39 | 18.596 | -6.759  | 3.729   | 1.00 | 21.46 | C   |
| ATOM | 298 | NE2 | HIS | A | 39 | 17.980 | -7.900  | 3.492   | 1.00 | 22.35 | N   |
| ATOM | 299 | N   | VAL | A | 40 | 18.052 | -5.725  | -2.797  | 1.00 | 17.74 | N   |
| ATOM | 300 | CA  | VAL | A | 40 | 17.394 | -5.125  | -3.959  | 1.00 | 17.68 | C   |
| ATOM | 301 | C   | VAL | A | 40 | 17.509 | -5.956  | -5.264  | 1.00 | 21.04 | C   |
| ATOM | 302 | O   | VAL | A | 40 | 16.509 | -6.136  | -5.967  | 1.00 | 22.22 | O   |
| ATOM | 303 | CB  | VAL | A | 40 | 17.863 | -3.667  | -4.225  | 1.00 | 15.09 | C   |
| ATOM | 304 | CG1 | VAL | A | 40 | 16.681 | -2.748  | -4.220  | 1.00 | 15.66 | C   |
| ATOM | 305 | CG2 | VAL | A | 40 | 18.816 | -3.204  | -3.185  | 1.00 | 12.61 | C   |
| ATOM | 306 | N   | LYS | A | 41 | 18.664 | -6.575  | -5.518  | 1.00 | 21.82 | N   |
| ATOM | 307 | CA  | LYS | A | 41 | 18.789 | -7.519  | -6.630  | 1.00 | 21.46 | C   |
| ATOM | 308 | C   | LYS | A | 41 | 17.644 | -8.486  | -6.523  | 1.00 | 21.01 | C   |
| ATOM | 309 | O   | LYS | A | 41 | 16.769 | -8.480  | -7.376  | 1.00 | 23.65 | O   |
| ATOM | 310 | CB  | LYS | A | 41 | 20.108 | -8.290  | -6.546  | 1.00 | 25.68 | C   |
| ATOM | 311 | CG  | LYS | A | 41 | 20.620 | -8.833  | -7.888  | 1.00 | 27.49 | C   |
| ATOM | 312 | CD  | LYS | A | 41 | 22.165 | -8.736  | -8.020  | 1.00 | 23.95 | C   |
| ATOM | 313 | CE  | LYS | A | 41 | 22.573 | -8.660  | -9.504  | 1.00 | 21.47 | C   |
| ATOM | 314 | NZ  | LYS | A | 41 | 23.966 | -8.207  | -9.722  | 1.00 | 16.15 | N1+ |
| ATOM | 315 | N   | LEU | A | 42 | 17.495 | -9.053  | -5.324  | 1.00 | 21.14 | N   |
| ATOM | 316 | CA  | LEU | A | 42 | 16.451 | -10.045 | -5.020  | 1.00 | 20.21 | C   |
| ATOM | 317 | C   | LEU | A | 42 | 15.021 | -9.526  | -5.193  | 1.00 | 18.80 | C   |
| ATOM | 318 | O   | LEU | A | 42 | 14.119 | -10.252 | -5.621  | 1.00 | 14.06 | O   |
| ATOM | 319 | CB  | LEU | A | 42 | 16.653 | -10.582 | -3.604  | 1.00 | 20.68 | C   |
| ATOM | 320 | CG  | LEU | A | 42 | 18.057 | -11.154 | -3.410  | 1.00 | 23.93 | C   |
| ATOM | 321 | CD1 | LEU | A | 42 | 18.337 | -11.363 | -1.954  | 1.00 | 26.48 | C   |
| ATOM | 322 | CD2 | LEU | A | 42 | 18.195 | -12.468 | -4.155  | 1.00 | 27.94 | C   |
| ATOM | 323 | N   | VAL | A | 43 | 14.828 | -8.248  | -4.920  | 1.00 | 20.91 | N   |
| ATOM | 324 | CA  | VAL | A | 43 | 13.557 | -7.646  | -5.243  | 1.00 | 25.09 | C   |
| ATOM | 325 | C   | VAL | A | 43 | 13.455 | -7.618  | -6.756  | 1.00 | 24.80 | C   |
| ATOM | 326 | O   | VAL | A | 43 | 12.655 | -8.371  | -7.319  | 1.00 | 24.61 | O   |
| ATOM | 327 | CB  | VAL | A | 43 | 13.424 | -6.220  | -4.671  | 1.00 | 29.14 | C   |
| ATOM | 328 | CG1 | VAL | A | 43 | 12.078 | -5.628  | -5.086  | 1.00 | 29.20 | C   |
| ATOM | 329 | CG2 | VAL | A | 43 | 13.555 | -6.252  | -3.122  | 1.00 | 29.89 | C   |
| ATOM | 330 | N   | ASN | A | 44 | 14.422 | -6.952  | -7.393  | 1.00 | 24.28 | N   |
| ATOM | 331 | CA  | ASN | A | 44 | 14.472 | -6.794  | -8.849  | 1.00 | 24.67 | C   |
| ATOM | 332 | C   | ASN | A | 44 | 13.983 | -8.073  | -9.527  | 1.00 | 25.13 | C   |
| ATOM | 333 | O   | ASN | A | 44 | 13.160 | -8.021  | -10.443 | 1.00 | 27.80 | O   |
| ATOM | 334 | CB  | ASN | A | 44 | 15.908 | -6.461  | -9.325  | 1.00 | 25.32 | C   |
| ATOM | 335 | CG  | ASN | A | 44 | 16.357 | -5.040  | -8.947  | 1.00 | 29.48 | C   |
| ATOM | 336 | ND2 | ASN | A | 44 | 15.803 | -4.049  | -9.631  | 1.00 | 31.83 | N   |
| ATOM | 337 | OD1 | ASN | A | 44 | 17.192 | -4.838  | -8.052  | 1.00 | 30.17 | O   |
| ATOM | 338 | N   | GLU | A | 45 | 14.326 | -9.217  | -8.942  | 1.00 | 24.11 | N   |
| ATOM | 339 | CA  | GLU | A | 45 | 14.019 | -10.503 | -9.553  | 1.00 | 25.12 | C   |
| ATOM | 340 | C   | GLU | A | 45 | 12.569 | -10.992 | -9.356  | 1.00 | 26.68 | C   |
| ATOM | 341 | O   | GLU | A | 45 | 11.931 | -11.464 | -10.315 | 1.00 | 26.81 | O   |
| ATOM | 342 | CB  | GLU | A | 45 | 15.015 | -11.547 | -9.043  | 1.00 | 22.72 | C   |
| ATOM | 343 | CG  | GLU | A | 45 | 16.351 | -11.537 | -9.773  | 1.00 | 16.42 | C   |
| ATOM | 344 | CD  | GLU | A | 45 | 17.486 | -11.808 | -8.848  | 1.00 | 12.41 | C   |
| ATOM | 345 | OE1 | GLU | A | 45 | 17.454 | -12.854 | -8.182  | 1.00 | 8.42  | O   |
| ATOM | 346 | OE2 | GLU | A | 45 | 18.353 | -10.928 | -8.705  | 1.00 | 12.61 | O1- |
| ATOM | 347 | N   | VAL | A | 46 | 12.105 | -10.980 | -8.100  | 1.00 | 28.78 | N   |
| ATOM | 348 | CA  | VAL | A | 46 | 10.677 | -11.141 | -7.758  | 1.00 | 27.45 | C   |
| ATOM | 349 | C   | VAL | A | 46 | 9.849  | -10.270 | -8.670  | 1.00 | 25.30 | C   |
| ATOM | 350 | O   | VAL | A | 46 | 8.937  | -10.754 | -9.344  | 1.00 | 24.88 | O   |
| ATOM | 351 | CB  | VAL | A | 46 | 10.352 | -10.637 | -6.332  | 1.00 | 28.88 | C   |
| ATOM | 352 | CG1 | VAL | A | 46 | 8.928  | -11.039 | -5.958  | 1.00 | 28.73 | C   |

|      |     |     |     |   |    |        |         |         |      |       |     |
|------|-----|-----|-----|---|----|--------|---------|---------|------|-------|-----|
| ATOM | 353 | CG2 | VAL | A | 46 | 11.381 | -11.152 | -5.327  | 1.00 | 30.37 | C   |
| ATOM | 354 | N   | THR | A | 47 | 10.115 | -8.966  | -8.588  | 1.00 | 22.75 | N   |
| ATOM | 355 | CA  | THR | A | 47 | 9.506  | -7.984  | -9.460  | 1.00 | 21.85 | C   |
| ATOM | 356 | C   | THR | A | 47 | 9.418  | -8.500  | -10.909 | 1.00 | 24.34 | C   |
| ATOM | 357 | O   | THR | A | 47 | 8.328  | -8.429  | -11.517 | 1.00 | 23.89 | O   |
| ATOM | 358 | CB  | THR | A | 47 | 10.293 | -6.653  | -9.427  | 1.00 | 20.39 | C   |
| ATOM | 359 | CG2 | THR | A | 47 | 9.430  | -5.527  | -9.894  | 1.00 | 22.88 | C   |
| ATOM | 360 | OG1 | THR | A | 47 | 10.696 | -6.351  | -8.090  | 1.00 | 18.42 | O   |
| ATOM | 361 | N   | GLU | A | 48 | 10.502 | -9.131  | -11.402 | 1.00 | 24.26 | N   |
| ATOM | 362 | CA  | GLU | A | 48 | 10.540 | -9.677  | -12.778 | 1.00 | 25.92 | C   |
| ATOM | 363 | C   | GLU | A | 48 | 9.432  | -10.732 | -13.024 | 1.00 | 26.47 | C   |
| ATOM | 364 | O   | GLU | A | 48 | 8.254  | -10.386 | -13.267 | 1.00 | 21.91 | O   |
| ATOM | 365 | CB  | GLU | A | 48 | 11.920 | -10.285 | -13.101 | 1.00 | 25.59 | C   |
| ATOM | 366 | CG  | GLU | A | 48 | 12.994 | -9.275  | -13.584 | 1.00 | 34.29 | C   |
| ATOM | 367 | CD  | GLU | A | 48 | 13.681 | -9.665  | -14.925 | 1.00 | 37.71 | C   |
| ATOM | 368 | OE1 | GLU | A | 48 | 14.662 | -10.459 | -14.916 | 1.00 | 37.81 | O   |
| ATOM | 369 | OE2 | GLU | A | 48 | 13.290 | -9.109  | -15.986 | 1.00 | 39.96 | O1- |
| ATOM | 370 | N   | PHE | A | 49 | 9.865  | -11.982 | -13.195 | 1.00 | 26.44 | N   |
| ATOM | 371 | CA  | PHE | A | 49 | 9.041  | -13.162 | -12.909 | 1.00 | 26.68 | C   |
| ATOM | 372 | C   | PHE | A | 49 | 7.528  | -12.915 | -12.813 | 1.00 | 27.60 | C   |
| ATOM | 373 | O   | PHE | A | 49 | 6.732  | -13.630 | -13.444 | 1.00 | 27.93 | O   |
| ATOM | 374 | CB  | PHE | A | 49 | 9.534  | -13.796 | -11.611 | 1.00 | 23.99 | C   |
| ATOM | 375 | CG  | PHE | A | 49 | 9.256  | -15.241 | -11.510 | 1.00 | 22.41 | C   |
| ATOM | 376 | CD1 | PHE | A | 49 | 8.042  | -15.760 | -11.905 | 1.00 | 25.30 | C   |
| ATOM | 377 | CD2 | PHE | A | 49 | 10.177 | -16.079 | -10.948 | 1.00 | 23.15 | C   |
| ATOM | 378 | CE1 | PHE | A | 49 | 7.754  | -17.099 | -11.725 | 1.00 | 26.44 | C   |
| ATOM | 379 | CE2 | PHE | A | 49 | 9.893  | -17.410 | -10.766 | 1.00 | 26.07 | C   |
| ATOM | 380 | CZ  | PHE | A | 49 | 8.682  | -17.917 | -11.151 | 1.00 | 23.64 | C   |
| ATOM | 381 | N   | ALA | A | 50 | 7.147  | -12.051 | -11.869 | 1.00 | 28.68 | N   |
| ATOM | 382 | CA  | ALA | A | 50 | 5.757  | -11.693 | -11.611 | 1.00 | 26.29 | C   |
| ATOM | 383 | C   | ALA | A | 50 | 5.093  | -11.370 | -12.939 | 1.00 | 26.64 | C   |
| ATOM | 384 | O   | ALA | A | 50 | 4.068  | -11.963 | -13.302 | 1.00 | 25.34 | O   |
| ATOM | 385 | CB  | ALA | A | 50 | 5.717  | -10.487 | -10.704 | 1.00 | 22.98 | C   |
| ATOM | 386 | N   | LYS | A | 51 | 5.773  | -10.515 | -13.703 | 1.00 | 26.55 | N   |
| ATOM | 387 | CA  | LYS | A | 51 | 5.334  | -10.065 | -15.024 | 1.00 | 24.67 | C   |
| ATOM | 388 | C   | LYS | A | 51 | 5.138  | -11.225 | -15.983 | 1.00 | 23.19 | C   |
| ATOM | 389 | O   | LYS | A | 51 | 4.298  | -11.140 | -16.871 | 1.00 | 22.00 | O   |
| ATOM | 390 | CB  | LYS | A | 51 | 6.366  | -9.099  | -15.636 | 1.00 | 25.82 | C   |
| ATOM | 391 | CG  | LYS | A | 51 | 6.392  | -7.692  | -15.057 | 1.00 | 20.83 | C   |
| ATOM | 392 | CD  | LYS | A | 51 | 7.753  | -7.062  | -15.237 | 1.00 | 15.07 | C   |
| ATOM | 393 | CE  | LYS | A | 51 | 7.799  | -5.778  | -14.475 | 1.00 | 17.03 | C   |
| ATOM | 394 | NZ  | LYS | A | 51 | 7.346  | -5.991  | -13.051 | 1.00 | 19.85 | N1+ |
| ATOM | 395 | N   | THR | A | 52 | 5.942  | -12.276 | -15.844 | 1.00 | 20.21 | N   |
| ATOM | 396 | CA  | THR | A | 52 | 5.860  | -13.406 | -16.750 | 1.00 | 20.84 | C   |
| ATOM | 397 | C   | THR | A | 52 | 4.763  | -14.438 | -16.407 | 1.00 | 23.73 | C   |
| ATOM | 398 | O   | THR | A | 52 | 4.255  | -15.121 | -17.310 | 1.00 | 25.44 | O   |
| ATOM | 399 | CB  | THR | A | 52 | 7.233  | -14.084 | -16.902 | 1.00 | 18.84 | C   |
| ATOM | 400 | CG2 | THR | A | 52 | 7.234  | -15.510 | -16.319 | 1.00 | 15.42 | C   |
| ATOM | 401 | OG1 | THR | A | 52 | 7.585  | -14.107 | -18.292 | 1.00 | 18.38 | O   |
| ATOM | 402 | N   | CYS | A | 53 | 4.305  | -14.468 | -15.154 | 1.00 | 24.15 | N   |
| ATOM | 403 | CA  | CYS | A | 53 | 3.020  | -15.113 | -14.852 | 1.00 | 23.39 | C   |
| ATOM | 404 | C   | CYS | A | 53 | 1.841  | -14.134 | -15.054 | 1.00 | 21.30 | C   |
| ATOM | 405 | O   | CYS | A | 53 | 0.704  | -14.552 | -15.268 | 1.00 | 21.30 | O   |
| ATOM | 406 | CB  | CYS | A | 53 | 3.000  | -15.710 | -13.428 | 1.00 | 24.03 | C   |
| ATOM | 407 | SG  | CYS | A | 53 | 4.336  | -16.896 | -13.023 | 1.00 | 22.23 | S   |
| ATOM | 408 | N   | VAL | A | 54 | 2.135  | -12.843 | -15.077 | 1.00 | 19.83 | N   |
| ATOM | 409 | CA  | VAL | A | 54 | 1.222  | -11.856 | -15.647 | 1.00 | 23.85 | C   |
| ATOM | 410 | C   | VAL | A | 54 | 0.895  | -12.233 | -17.099 | 1.00 | 24.27 | C   |
| ATOM | 411 | O   | VAL | A | 54 | -0.282 | -12.282 | -17.504 | 1.00 | 24.50 | O   |
| ATOM | 412 | CB  | VAL | A | 54 | 1.865  | -10.426 | -15.619 | 1.00 | 26.97 | C   |
| ATOM | 413 | CG1 | VAL | A | 54 | 1.309  | -9.538  | -16.746 | 1.00 | 26.12 | C   |
| ATOM | 414 | CG2 | VAL | A | 54 | 1.638  | -9.771  | -14.250 | 1.00 | 30.36 | C   |
| ATOM | 415 | N   | ALA | A | 55 | 1.952  | -12.457 | -17.881 | 1.00 | 22.66 | N   |
| ATOM | 416 | CA  | ALA | A | 55 | 1.845  | -12.830 | -19.291 | 1.00 | 20.65 | C   |
| ATOM | 417 | C   | ALA | A | 55 | 0.971  | -14.066 | -19.412 | 1.00 | 21.32 | C   |
| ATOM | 418 | O   | ALA | A | 55 | 0.002  | -14.111 | -20.189 | 1.00 | 20.09 | O   |
| ATOM | 419 | CB  | ALA | A | 55 | 3.235  | -13.120 | -19.850 | 1.00 | 18.03 | C   |
| ATOM | 420 | N   | ASP | A | 56 | 1.236  | -14.994 | -18.498 | 1.00 | 22.03 | N   |
| ATOM | 421 | CA  | ASP | A | 56 | 0.765  | -16.364 | -18.591 | 1.00 | 20.78 | C   |
| ATOM | 422 | C   | ASP | A | 56 | 0.823  | -16.974 | -17.200 | 1.00 | 17.21 | C   |
| ATOM | 423 | O   | ASP | A | 56 | 1.892  | -17.299 | -16.698 | 1.00 | 13.60 | O   |



|      |     |     |     |   |    |        |         |         |      |       |     |
|------|-----|-----|-----|---|----|--------|---------|---------|------|-------|-----|
| ATOM | 424 | CB  | ASP | A | 56 | 1.667  | -17.168 | -19.555 | 1.00 | 21.11 | C   |
| ATOM | 425 | CG  | ASP | A | 56 | 0.882  | -17.885 | -20.641 | 1.00 | 20.85 | C   |
| ATOM | 426 | OD1 | ASP | A | 56 | -0.136 | -17.326 | -21.131 | 1.00 | 18.50 | O   |
| ATOM | 427 | OD2 | ASP | A | 56 | 1.283  | -19.021 | -20.979 | 1.00 | 19.93 | O1- |
| ATOM | 428 | N   | GLU | A | 57 | -0.326 | -17.055 | -16.554 | 1.00 | 17.39 | N   |
| ATOM | 429 | CA  | GLU | A | 57 | -0.486 | -17.952 | -15.418 | 1.00 | 19.41 | C   |
| ATOM | 430 | C   | GLU | A | 57 | 0.281  | -19.246 | -15.683 | 1.00 | 19.69 | C   |
| ATOM | 431 | O   | GLU | A | 57 | 1.357  | -19.437 | -15.115 | 1.00 | 18.89 | O   |
| ATOM | 432 | CB  | GLU | A | 57 | -1.968 | -18.291 | -15.198 | 1.00 | 21.01 | C   |
| ATOM | 433 | CG  | GLU | A | 57 | -2.926 | -17.181 | -15.550 | 1.00 | 18.07 | C   |
| ATOM | 434 | CD  | GLU | A | 57 | -3.521 | -16.521 | -14.336 | 1.00 | 21.55 | C   |
| ATOM | 435 | OE1 | GLU | A | 57 | -2.782 | -15.874 | -13.551 | 1.00 | 18.91 | O   |
| ATOM | 436 | OE2 | GLU | A | 57 | -4.756 | -16.620 | -14.200 | 1.00 | 23.50 | O1- |
| ATOM | 437 | N   | SER | A | 58 | -0.138 | -19.944 | -16.752 | 1.00 | 20.54 | N   |
| ATOM | 438 | CA  | SER | A | 58 | 0.233  | -21.343 | -17.074 | 1.00 | 18.77 | C   |
| ATOM | 439 | C   | SER | A | 58 | 1.734  | -21.685 | -17.200 | 1.00 | 16.17 | C   |
| ATOM | 440 | O   | SER | A | 58 | 2.107  | -22.848 | -17.305 | 1.00 | 12.41 | O   |
| ATOM | 441 | CB  | SER | A | 58 | -0.468 | -21.771 | -18.367 | 1.00 | 19.91 | C   |
| ATOM | 442 | OG  | SER | A | 58 | -1.586 | -20.943 | -18.670 | 1.00 | 22.34 | O   |
| ATOM | 443 | N   | ALA | A | 59 | 2.580  | -20.666 | -17.191 | 1.00 | 16.30 | N   |
| ATOM | 444 | CA  | ALA | A | 59 | 4.000  | -20.840 | -17.363 | 1.00 | 19.02 | C   |
| ATOM | 445 | C   | ALA | A | 59 | 4.585  | -21.590 | -16.177 | 1.00 | 21.95 | C   |
| ATOM | 446 | O   | ALA | A | 59 | 4.252  | -21.262 | -15.033 | 1.00 | 23.97 | O   |
| ATOM | 447 | CB  | ALA | A | 59 | 4.640  | -19.489 | -17.474 | 1.00 | 22.09 | C   |
| ATOM | 448 | N   | GLU | A | 60 | 5.602  | -22.419 | -16.441 | 1.00 | 22.59 | N   |
| ATOM | 449 | CA  | GLU | A | 60 | 6.267  | -23.242 | -15.417 | 1.00 | 22.93 | C   |
| ATOM | 450 | C   | GLU | A | 60 | 6.511  | -22.498 | -14.113 | 1.00 | 24.76 | C   |
| ATOM | 451 | O   | GLU | A | 60 | 6.901  | -21.338 | -14.122 | 1.00 | 28.75 | O   |
| ATOM | 452 | CB  | GLU | A | 60 | 7.611  | -23.778 | -15.934 | 1.00 | 19.81 | C   |
| ATOM | 453 | CG  | GLU | A | 60 | 8.417  | -24.596 | -14.918 | 1.00 | 16.82 | C   |
| ATOM | 454 | CD  | GLU | A | 60 | 9.732  | -25.160 | -15.474 | 1.00 | 17.21 | C   |
| ATOM | 455 | OE1 | GLU | A | 60 | 10.733 | -24.414 | -15.489 | 1.00 | 14.77 | O   |
| ATOM | 456 | OE2 | GLU | A | 60 | 9.794  | -26.376 | -15.792 | 1.00 | 16.15 | O1- |
| ATOM | 457 | N   | ASN | A | 61 | 6.248  | -23.175 | -13.002 | 1.00 | 25.15 | N   |
| ATOM | 458 | CA  | ASN | A | 61 | 6.546  | -22.712 | -11.638 | 1.00 | 26.26 | C   |
| ATOM | 459 | C   | ASN | A | 61 | 5.873  | -21.448 | -11.121 | 1.00 | 26.29 | C   |
| ATOM | 460 | O   | ASN | A | 61 | 6.007  | -21.124 | -9.945  | 1.00 | 26.16 | O   |
| ATOM | 461 | CB  | ASN | A | 61 | 8.054  | -22.619 | -11.376 | 1.00 | 25.05 | C   |
| ATOM | 462 | CG  | ASN | A | 61 | 8.730  | -21.612 | -12.252 | 1.00 | 25.32 | C   |
| ATOM | 463 | ND2 | ASN | A | 61 | 8.313  | -20.363 | -12.155 | 1.00 | 21.35 | N   |
| ATOM | 464 | OD1 | ASN | A | 61 | 9.503  | -21.985 | -13.129 | 1.00 | 26.74 | O   |
| ATOM | 465 | N   | CYS | A | 62 | 5.005  | -20.840 | -11.915 | 1.00 | 27.22 | N   |
| ATOM | 466 | CA  | CYS | A | 62 | 4.054  | -19.901 | -11.338 | 1.00 | 27.20 | C   |
| ATOM | 467 | C   | CYS | A | 62 | 3.419  | -20.547 | -10.106 | 1.00 | 27.53 | C   |
| ATOM | 468 | O   | CYS | A | 62 | 3.560  | -20.010 | -9.012  | 1.00 | 27.96 | O   |
| ATOM | 469 | CB  | CYS | A | 62 | 3.001  | -19.538 | -12.379 | 1.00 | 27.41 | C   |
| ATOM | 470 | SG  | CYS | A | 62 | 3.731  | -18.673 | -13.817 | 1.00 | 27.27 | S   |
| ATOM | 471 | N   | ASP | A | 63 | 3.166  | -21.853 | -10.247 | 1.00 | 29.32 | N   |
| ATOM | 472 | CA  | ASP | A | 63 | 2.519  | -22.729 | -9.259  | 1.00 | 29.88 | C   |
| ATOM | 473 | C   | ASP | A | 63 | 3.127  | -22.814 | -7.853  | 1.00 | 31.82 | C   |
| ATOM | 474 | O   | ASP | A | 63 | 2.702  | -23.660 | -7.046  | 1.00 | 30.96 | O   |
| ATOM | 475 | CB  | ASP | A | 63 | 2.437  | -24.142 | -9.824  | 1.00 | 29.57 | C   |
| ATOM | 476 | CG  | ASP | A | 63 | 1.214  | -24.355 | -10.687 | 1.00 | 31.17 | C   |
| ATOM | 477 | OD1 | ASP | A | 63 | 1.082  | -23.702 | -11.758 | 1.00 | 32.77 | O   |
| ATOM | 478 | OD2 | ASP | A | 63 | 0.381  | -25.200 | -10.295 | 1.00 | 32.47 | O1- |
| ATOM | 479 | N   | LYS | A | 64 | 4.183  | -22.033 | -7.600  | 1.00 | 33.23 | N   |
| ATOM | 480 | CA  | LYS | A | 64 | 4.695  | -21.785 | -6.244  | 1.00 | 30.18 | C   |
| ATOM | 481 | C   | LYS | A | 64 | 3.561  | -21.200 | -5.372  | 1.00 | 29.80 | C   |
| ATOM | 482 | O   | LYS | A | 64 | 2.803  | -20.316 | -5.817  | 1.00 | 28.83 | O   |
| ATOM | 483 | CB  | LYS | A | 64 | 5.864  | -20.782 | -6.308  | 1.00 | 27.37 | C   |
| ATOM | 484 | CG  | LYS | A | 64 | 7.257  | -21.397 | -6.361  | 1.00 | 25.95 | C   |
| ATOM | 485 | CD  | LYS | A | 64 | 7.352  | -22.527 | -7.386  | 1.00 | 27.90 | C   |
| ATOM | 486 | CE  | LYS | A | 64 | 8.191  | -23.714 | -6.889  | 1.00 | 28.98 | C   |
| ATOM | 487 | NZ  | LYS | A | 64 | 9.640  | -23.392 | -6.604  | 1.00 | 27.67 | N1+ |
| ATOM | 488 | N   | SER | A | 65 | 3.474  | -21.647 | -4.120  | 1.00 | 28.75 | N   |
| ATOM | 489 | CA  | SER | A | 65 | 2.650  | -20.934 | -3.136  | 1.00 | 27.25 | C   |
| ATOM | 490 | C   | SER | A | 65 | 3.419  | -19.725 | -2.546  | 1.00 | 25.40 | C   |
| ATOM | 491 | O   | SER | A | 65 | 4.196  | -19.869 | -1.583  | 1.00 | 21.94 | O   |
| ATOM | 492 | CB  | SER | A | 65 | 2.188  | -21.897 | -2.019  | 1.00 | 28.94 | C   |
| ATOM | 493 | OG  | SER | A | 65 | 0.824  | -22.307 | -2.198  | 1.00 | 26.21 | O   |
| ATOM | 494 | N   | LEU | A | 66 | 3.329  | -18.597 | -3.256  | 1.00 | 21.69 | N   |

|      |     |     |     |   |    |        |         |        |      |       |     |
|------|-----|-----|-----|---|----|--------|---------|--------|------|-------|-----|
| ATOM | 495 | CA  | LEU | A | 66 | 3.971  | -17.330 | -2.891 | 1.00 | 18.29 | C   |
| ATOM | 496 | C   | LEU | A | 66 | 5.229  | -17.507 | -2.069 | 1.00 | 20.23 | C   |
| ATOM | 497 | O   | LEU | A | 66 | 6.283  | -17.683 | -2.652 | 1.00 | 23.75 | O   |
| ATOM | 498 | CB  | LEU | A | 66 | 2.982  | -16.401 | -2.180 | 1.00 | 12.64 | C   |
| ATOM | 499 | CG  | LEU | A | 66 | 3.160  | -14.880 | -2.253 | 1.00 | 5.07  | C   |
| ATOM | 500 | CD1 | LEU | A | 66 | 4.592  | -14.537 | -2.380 | 1.00 | 2.40  | C   |
| ATOM | 501 | CD2 | LEU | A | 66 | 2.384  | -14.296 | -3.399 | 1.00 | 2.17  | C   |
| ATOM | 502 | N   | HIS | A | 67 | 5.083  | -17.646 | -0.749 | 1.00 | 23.72 | N   |
| ATOM | 503 | CA  | HIS | A | 67 | 6.208  | -17.826 | 0.192  | 1.00 | 25.77 | C   |
| ATOM | 504 | C   | HIS | A | 67 | 7.266  | -18.712 | -0.428 | 1.00 | 27.03 | C   |
| ATOM | 505 | O   | HIS | A | 67 | 8.407  | -18.292 | -0.612 | 1.00 | 28.17 | O   |
| ATOM | 506 | CB  | HIS | A | 67 | 5.757  | -18.505 | 1.505  | 1.00 | 27.30 | C   |
| ATOM | 507 | CG  | HIS | A | 67 | 5.053  | -17.596 | 2.474  | 1.00 | 28.03 | C   |
| ATOM | 508 | CD2 | HIS | A | 67 | 5.372  | -16.363 | 2.940  | 1.00 | 25.15 | C   |
| ATOM | 509 | ND1 | HIS | A | 67 | 3.955  | -18.009 | 3.206  | 1.00 | 25.30 | N   |
| ATOM | 510 | CE1 | HIS | A | 67 | 3.645  | -17.076 | 4.091  | 1.00 | 24.34 | C   |
| ATOM | 511 | NE2 | HIS | A | 67 | 4.488  | -16.070 | 3.947  | 1.00 | 23.45 | N   |
| ATOM | 512 | N   | THR | A | 68 | 6.833  | -19.877 | -0.895 | 1.00 | 28.20 | N   |
| ATOM | 513 | CA  | THR | A | 68 | 7.749  | -20.853 | -1.467 | 1.00 | 31.25 | C   |
| ATOM | 514 | C   | THR | A | 68 | 8.754  | -20.271 | -2.461 | 1.00 | 32.00 | C   |
| ATOM | 515 | O   | THR | A | 68 | 9.905  | -20.750 | -2.549 | 1.00 | 31.36 | O   |
| ATOM | 516 | CB  | THR | A | 68 | 6.986  | -21.972 | -2.142 | 1.00 | 32.39 | C   |
| ATOM | 517 | CG2 | THR | A | 68 | 7.624  | -23.327 | -1.793 | 1.00 | 31.68 | C   |
| ATOM | 518 | OG1 | THR | A | 68 | 5.617  | -21.933 | -1.697 | 1.00 | 35.75 | O   |
| ATOM | 519 | N   | LEU | A | 69 | 8.353  | -19.227 | -3.185 | 1.00 | 31.87 | N   |
| ATOM | 520 | CA  | LEU | A | 69 | 9.340  | -18.500 | -3.974 | 1.00 | 33.65 | C   |
| ATOM | 521 | C   | LEU | A | 69 | 10.314 | -17.880 | -2.982 | 1.00 | 32.74 | C   |
| ATOM | 522 | O   | LEU | A | 69 | 11.288 | -18.548 | -2.631 | 1.00 | 32.06 | O   |
| ATOM | 523 | CB  | LEU | A | 69 | 8.705  | -17.444 | -4.905 | 1.00 | 34.67 | C   |
| ATOM | 524 | CG  | LEU | A | 69 | 9.426  | -17.171 | -6.259 | 1.00 | 34.79 | C   |
| ATOM | 525 | CD1 | LEU | A | 69 | 10.395 | -15.967 | -6.148 | 1.00 | 32.65 | C   |
| ATOM | 526 | CD2 | LEU | A | 69 | 10.174 | -18.427 | -6.738 | 1.00 | 31.64 | C   |
| ATOM | 527 | N   | PHE | A | 70 | 9.943  | -16.747 | -2.374 | 1.00 | 30.96 | N   |
| ATOM | 528 | CA  | PHE | A | 70 | 10.788 | -16.080 | -1.365 | 1.00 | 30.54 | C   |
| ATOM | 529 | C   | PHE | A | 70 | 11.691 | -17.099 | -0.646 | 1.00 | 29.74 | C   |
| ATOM | 530 | O   | PHE | A | 70 | 12.906 | -17.097 | -0.807 | 1.00 | 26.41 | O   |
| ATOM | 531 | CB  | PHE | A | 70 | 9.932  | -15.387 | -0.288 | 1.00 | 30.25 | C   |
| ATOM | 532 | CG  | PHE | A | 70 | 9.227  | -14.125 | -0.737 | 1.00 | 28.46 | C   |
| ATOM | 533 | CD1 | PHE | A | 70 | 8.468  | -14.109 | -1.899 | 1.00 | 26.39 | C   |
| ATOM | 534 | CD2 | PHE | A | 70 | 9.075  | -13.072 | 0.168  | 1.00 | 24.40 | C   |
| ATOM | 535 | CE1 | PHE | A | 70 | 7.554  | -13.084 | -2.130 | 1.00 | 27.08 | C   |
| ATOM | 536 | CE2 | PHE | A | 70 | 8.165  | -12.058 | -0.054 | 1.00 | 21.72 | C   |
| ATOM | 537 | CZ  | PHE | A | 70 | 7.399  | -12.062 | -1.196 | 1.00 | 25.72 | C   |
| ATOM | 538 | N   | GLY | A | 71 | 11.043 | -18.122 | -0.104 | 1.00 | 31.24 | N   |
| ATOM | 539 | CA  | GLY | A | 71 | 11.712 | -19.075 | 0.764  | 1.00 | 31.89 | C   |
| ATOM | 540 | C   | GLY | A | 71 | 12.873 | -19.697 | 0.044  | 1.00 | 31.60 | C   |
| ATOM | 541 | O   | GLY | A | 71 | 14.004 | -19.640 | 0.536  | 1.00 | 31.27 | O   |
| ATOM | 542 | N   | ASP | A | 72 | 12.614 | -19.987 | -1.227 | 1.00 | 33.37 | N   |
| ATOM | 543 | CA  | ASP | A | 72 | 13.555 | -20.627 | -2.154 | 1.00 | 33.34 | C   |
| ATOM | 544 | C   | ASP | A | 72 | 14.353 | -19.663 | -3.083 | 1.00 | 32.34 | C   |
| ATOM | 545 | O   | ASP | A | 72 | 15.121 | -20.113 | -3.946 | 1.00 | 30.19 | O   |
| ATOM | 546 | CB  | ASP | A | 72 | 12.767 | -21.662 | -2.979 | 1.00 | 33.35 | C   |
| ATOM | 547 | CG  | ASP | A | 72 | 12.165 | -22.762 | -2.099 | 1.00 | 31.88 | C   |
| ATOM | 548 | OD1 | ASP | A | 72 | 12.805 | -23.100 | -1.077 | 1.00 | 30.99 | O   |
| ATOM | 549 | OD2 | ASP | A | 72 | 11.059 | -23.269 | -2.406 | 1.00 | 29.43 | O1- |
| ATOM | 550 | N   | LYS | A | 73 | 14.183 | -18.352 | -2.870 | 1.00 | 31.11 | N   |
| ATOM | 551 | CA  | LYS | A | 73 | 14.958 | -17.288 | -3.538 | 1.00 | 27.64 | C   |
| ATOM | 552 | C   | LYS | A | 73 | 15.199 | -16.145 | -2.533 | 1.00 | 26.15 | C   |
| ATOM | 553 | O   | LYS | A | 73 | 14.585 | -15.081 | -2.619 | 1.00 | 23.20 | O   |
| ATOM | 554 | CB  | LYS | A | 73 | 14.187 | -16.738 | -4.757 | 1.00 | 28.01 | C   |
| ATOM | 555 | CG  | LYS | A | 73 | 14.083 | -17.691 | -5.962 | 1.00 | 25.72 | C   |
| ATOM | 556 | CD  | LYS | A | 73 | 14.918 | -17.203 | -7.143 | 1.00 | 24.18 | C   |
| ATOM | 557 | CE  | LYS | A | 73 | 14.754 | -15.712 | -7.383 | 1.00 | 23.68 | C   |
| ATOM | 558 | NZ  | LYS | A | 73 | 16.079 | -15.048 | -7.529 | 1.00 | 22.67 | N1+ |
| ATOM | 559 | N   | LEU | A | 74 | 16.031 | -16.423 | -1.533 | 1.00 | 27.33 | N   |
| ATOM | 560 | CA  | LEU | A | 74 | 16.166 | -15.602 | -0.312 | 1.00 | 26.12 | C   |
| ATOM | 561 | C   | LEU | A | 74 | 17.355 | -16.178 | 0.438  | 1.00 | 23.46 | C   |
| ATOM | 562 | O   | LEU | A | 74 | 18.398 | -15.545 | 0.518  | 1.00 | 21.59 | O   |
| ATOM | 563 | CB  | LEU | A | 74 | 14.922 | -15.728 | 0.593  | 1.00 | 26.77 | C   |
| ATOM | 564 | CG  | LEU | A | 74 | 14.153 | -14.538 | 1.199  | 1.00 | 25.70 | C   |
| ATOM | 565 | CD1 | LEU | A | 74 | 12.799 | -15.077 | 1.659  | 1.00 | 26.20 | C   |

|      |     |     |     |   |    |        |         |        |      |       |     |
|------|-----|-----|-----|---|----|--------|---------|--------|------|-------|-----|
| ATOM | 566 | CD2 | LEU | A | 74 | 14.879 | -13.871 | 2.381  | 1.00 | 22.43 | C   |
| ATOM | 567 | N   | CYS | A | 75 | 17.225 | -17.448 | 0.826  | 1.00 | 24.52 | N   |
| ATOM | 568 | CA  | CYS | A | 75 | 18.313 | -18.240 | 1.395  | 1.00 | 26.88 | C   |
| ATOM | 569 | C   | CYS | A | 75 | 19.554 | -18.212 | 0.475  | 1.00 | 28.33 | C   |
| ATOM | 570 | O   | CYS | A | 75 | 20.714 | -18.148 | 0.939  | 1.00 | 26.66 | O   |
| ATOM | 571 | CB  | CYS | A | 75 | 17.830 | -19.698 | 1.633  | 1.00 | 26.77 | C   |
| ATOM | 572 | SG  | CYS | A | 75 | 17.685 | -20.118 | 3.425  | 1.00 | 27.16 | S   |
| ATOM | 573 | N   | THR | A | 76 | 19.283 | -18.088 | -0.822 | 1.00 | 30.35 | N   |
| ATOM | 574 | CA  | THR | A | 76 | 20.287 | -18.225 | -1.866 | 1.00 | 30.59 | C   |
| ATOM | 575 | C   | THR | A | 76 | 21.471 | -17.261 | -1.658 | 1.00 | 30.26 | C   |
| ATOM | 576 | O   | THR | A | 76 | 22.293 | -17.437 | -0.739 | 1.00 | 29.82 | O   |
| ATOM | 577 | CB  | THR | A | 76 | 19.623 | -18.024 | -3.284 | 1.00 | 32.29 | C   |
| ATOM | 578 | CG2 | THR | A | 76 | 20.023 | -19.164 | -4.228 | 1.00 | 32.43 | C   |
| ATOM | 579 | OG1 | THR | A | 76 | 18.179 | -17.994 | -3.171 | 1.00 | 31.05 | O   |
| ATOM | 580 | N   | VAL | A | 77 | 21.493 | -16.179 | -2.427 | 1.00 | 31.21 | N   |
| ATOM | 581 | CA  | VAL | A | 77 | 22.661 | -15.299 | -2.455 | 1.00 | 30.79 | C   |
| ATOM | 582 | C   | VAL | A | 77 | 22.468 | -14.103 | -1.514 | 1.00 | 32.91 | C   |
| ATOM | 583 | O   | VAL | A | 77 | 23.392 | -13.312 | -1.272 | 1.00 | 33.22 | O   |
| ATOM | 584 | CB  | VAL | A | 77 | 22.944 | -14.813 | -3.893 | 1.00 | 28.48 | C   |
| ATOM | 585 | CG1 | VAL | A | 77 | 22.227 | -13.486 | -4.176 | 1.00 | 25.60 | C   |
| ATOM | 586 | CG2 | VAL | A | 77 | 24.439 | -14.718 | -4.118 | 1.00 | 24.59 | C   |
| ATOM | 587 | N   | ALA | A | 78 | 21.257 | -13.954 | -0.987 | 1.00 | 33.04 | N   |
| ATOM | 588 | CA  | ALA | A | 78 | 21.110 | -13.066 | 0.134  | 1.00 | 33.55 | C   |
| ATOM | 589 | C   | ALA | A | 78 | 22.005 | -13.706 | 1.199  | 1.00 | 35.33 | C   |
| ATOM | 590 | O   | ALA | A | 78 | 23.151 | -13.260 | 1.362  | 1.00 | 36.95 | O   |
| ATOM | 591 | CB  | ALA | A | 78 | 19.660 | -13.008 | 0.576  | 1.00 | 32.27 | C   |
| ATOM | 592 | N   | THR | A | 79 | 21.683 | -14.963 | 1.521  | 1.00 | 34.35 | N   |
| ATOM | 593 | CA  | THR | A | 79 | 22.100 | -15.570 | 2.779  | 1.00 | 33.26 | C   |
| ATOM | 594 | C   | THR | A | 79 | 23.555 | -16.077 | 2.835  | 1.00 | 32.95 | C   |
| ATOM | 595 | O   | THR | A | 79 | 24.250 | -15.840 | 3.828  | 1.00 | 29.56 | O   |
| ATOM | 596 | CB  | THR | A | 79 | 21.140 | -16.723 | 3.185  | 1.00 | 34.83 | C   |
| ATOM | 597 | CG2 | THR | A | 79 | 21.198 | -16.977 | 4.704  | 1.00 | 35.95 | C   |
| ATOM | 598 | OG1 | THR | A | 79 | 19.791 | -16.383 | 2.832  | 1.00 | 32.22 | O   |
| ATOM | 599 | N   | LEU | A | 80 | 24.027 | -16.777 | 1.798  | 1.00 | 32.03 | N   |
| ATOM | 600 | CA  | LEU | A | 80 | 25.417 | -17.297 | 1.808  | 1.00 | 28.26 | C   |
| ATOM | 601 | C   | LEU | A | 80 | 26.496 | -16.225 | 1.630  | 1.00 | 27.39 | C   |
| ATOM | 602 | O   | LEU | A | 80 | 27.663 | -16.471 | 1.914  | 1.00 | 27.30 | O   |
| ATOM | 603 | CB  | LEU | A | 80 | 25.609 | -18.388 | 0.750  | 1.00 | 27.14 | C   |
| ATOM | 604 | CG  | LEU | A | 80 | 26.202 | -18.027 | -0.613 | 1.00 | 23.17 | C   |
| ATOM | 605 | CD1 | LEU | A | 80 | 27.191 | -19.114 | -1.025 | 1.00 | 23.29 | C   |
| ATOM | 606 | CD2 | LEU | A | 80 | 25.084 | -17.888 | -1.649 | 1.00 | 22.37 | C   |
| ATOM | 607 | N   | ARG | A | 81 | 26.117 | -15.063 | 1.102  | 1.00 | 28.16 | N   |
| ATOM | 608 | CA  | ARG | A | 81 | 26.911 | -13.843 | 1.282  | 1.00 | 28.08 | C   |
| ATOM | 609 | C   | ARG | A | 81 | 26.719 | -13.293 | 2.706  | 1.00 | 29.33 | C   |
| ATOM | 610 | O   | ARG | A | 81 | 27.463 | -12.415 | 3.169  | 1.00 | 28.86 | O   |
| ATOM | 611 | CB  | ARG | A | 81 | 26.477 | -12.780 | 0.281  | 1.00 | 25.69 | C   |
| ATOM | 612 | CG  | ARG | A | 81 | 27.446 | -11.627 | 0.186  | 1.00 | 24.75 | C   |
| ATOM | 613 | CD  | ARG | A | 81 | 27.337 | -10.950 | -1.152 | 1.00 | 25.26 | C   |
| ATOM | 614 | NE  | ARG | A | 81 | 27.236 | -11.935 | -2.211 | 1.00 | 28.70 | N   |
| ATOM | 615 | CZ  | ARG | A | 81 | 28.043 | -12.988 | -2.337 | 1.00 | 32.72 | C   |
| ATOM | 616 | NH1 | ARG | A | 81 | 29.145 | -13.080 | -1.599 | 1.00 | 31.48 | N1+ |
| ATOM | 617 | NH2 | ARG | A | 81 | 27.766 | -13.933 | -3.239 | 1.00 | 35.72 | N   |
| ATOM | 618 | N   | GLU | A | 82 | 25.660 | -13.760 | 3.361  | 1.00 | 29.80 | N   |
| ATOM | 619 | CA  | GLU | A | 82 | 25.385 | -13.405 | 4.745  | 1.00 | 30.13 | C   |
| ATOM | 620 | C   | GLU | A | 82 | 25.702 | -14.591 | 5.709  | 1.00 | 28.95 | C   |
| ATOM | 621 | O   | GLU | A | 82 | 24.836 | -15.378 | 6.068  | 1.00 | 25.40 | O   |
| ATOM | 622 | CB  | GLU | A | 82 | 23.930 | -12.881 | 4.802  | 1.00 | 29.79 | C   |
| ATOM | 623 | CG  | GLU | A | 82 | 22.913 | -13.604 | 5.673  | 1.00 | 28.95 | C   |
| ATOM | 624 | CD  | GLU | A | 82 | 22.631 | -12.867 | 6.965  | 1.00 | 28.32 | C   |
| ATOM | 625 | OE1 | GLU | A | 82 | 23.152 | -11.733 | 7.119  | 1.00 | 27.70 | O   |
| ATOM | 626 | OE2 | GLU | A | 82 | 21.883 | -13.416 | 7.814  | 1.00 | 23.91 | O1- |
| ATOM | 627 | N   | THR | A | 83 | 26.989 | -14.795 | 5.996  | 1.00 | 29.92 | N   |
| ATOM | 628 | CA  | THR | A | 83 | 27.418 | -16.000 | 6.718  | 1.00 | 32.38 | C   |
| ATOM | 629 | C   | THR | A | 83 | 28.141 | -15.685 | 8.052  | 1.00 | 35.54 | C   |
| ATOM | 630 | O   | THR | A | 83 | 29.381 | -15.602 | 8.095  | 1.00 | 37.17 | O   |
| ATOM | 631 | CB  | THR | A | 83 | 28.363 | -16.937 | 5.826  | 1.00 | 29.73 | C   |
| ATOM | 632 | CG2 | THR | A | 83 | 27.562 | -17.986 | 5.086  | 1.00 | 28.72 | C   |
| ATOM | 633 | OG1 | THR | A | 83 | 29.107 | -16.168 | 4.865  | 1.00 | 28.72 | O   |
| ATOM | 634 | N   | TYR | A | 84 | 27.418 | -15.611 | 9.171  | 1.00 | 36.72 | N   |
| ATOM | 635 | CA  | TYR | A | 84 | 28.134 | -15.232 | 10.392 | 1.00 | 36.41 | C   |
| ATOM | 636 | C   | TYR | A | 84 | 27.787 | -15.855 | 11.752 | 1.00 | 37.17 | C   |

|      |     |     |     |   |    |        |         |        |      |       |     |
|------|-----|-----|-----|---|----|--------|---------|--------|------|-------|-----|
| ATOM | 637 | O   | TYR | A | 84 | 28.696 | -16.145 | 12.553 | 1.00 | 37.81 | O   |
| ATOM | 638 | CB  | TYR | A | 84 | 28.155 | -13.719 | 10.504 | 1.00 | 32.67 | C   |
| ATOM | 639 | CG  | TYR | A | 84 | 29.547 | -13.173 | 10.612 | 1.00 | 27.81 | C   |
| ATOM | 640 | CD1 | TYR | A | 84 | 30.321 | -13.442 | 11.728 | 1.00 | 26.38 | C   |
| ATOM | 641 | CD2 | TYR | A | 84 | 30.000 | -12.224 | 9.714  | 1.00 | 27.01 | C   |
| ATOM | 642 | CE1 | TYR | A | 84 | 31.467 | -12.758 | 11.964 | 1.00 | 24.78 | C   |
| ATOM | 643 | CE2 | TYR | A | 84 | 31.147 | -11.539 | 9.938  | 1.00 | 24.86 | C   |
| ATOM | 644 | CZ  | TYR | A | 84 | 31.865 | -11.794 | 11.072 | 1.00 | 25.15 | C   |
| ATOM | 645 | OH  | TYR | A | 84 | 32.909 | -10.976 | 11.395 | 1.00 | 27.73 | O   |
| ATOM | 646 | N   | GLY | A | 85 | 26.498 | -15.954 | 12.073 | 1.00 | 37.02 | N   |
| ATOM | 647 | CA  | GLY | A | 85 | 26.123 | -16.752 | 13.222 | 1.00 | 36.20 | C   |
| ATOM | 648 | C   | GLY | A | 85 | 25.033 | -16.151 | 14.070 | 1.00 | 35.50 | C   |
| ATOM | 649 | O   | GLY | A | 85 | 25.291 | -15.646 | 15.165 | 1.00 | 36.73 | O   |
| ATOM | 650 | N   | GLU | A | 86 | 23.816 | -16.174 | 13.539 | 1.00 | 34.43 | N   |
| ATOM | 651 | CA  | GLU | A | 86 | 22.602 | -16.106 | 14.366 | 1.00 | 31.00 | C   |
| ATOM | 652 | C   | GLU | A | 86 | 21.465 | -16.802 | 13.613 | 1.00 | 28.33 | C   |
| ATOM | 653 | O   | GLU | A | 86 | 20.837 | -17.735 | 14.124 | 1.00 | 28.62 | O   |
| ATOM | 654 | CB  | GLU | A | 86 | 22.220 | -14.655 | 14.676 | 1.00 | 29.50 | C   |
| ATOM | 655 | CG  | GLU | A | 86 | 21.084 | -14.522 | 15.646 | 1.00 | 25.84 | C   |
| ATOM | 656 | CD  | GLU | A | 86 | 21.097 | -15.620 | 16.687 | 1.00 | 26.43 | C   |
| ATOM | 657 | OE1 | GLU | A | 86 | 21.992 | -15.623 | 17.568 | 1.00 | 22.42 | O   |
| ATOM | 658 | OE2 | GLU | A | 86 | 20.223 | -16.512 | 16.584 | 1.00 | 27.71 | O1- |
| ATOM | 659 | N   | MET | A | 87 | 21.326 | -16.474 | 12.340 | 1.00 | 24.32 | N   |
| ATOM | 660 | CA  | MET | A | 87 | 20.476 | -17.275 | 11.494 | 1.00 | 24.03 | C   |
| ATOM | 661 | C   | MET | A | 87 | 21.175 | -18.576 | 11.102 | 1.00 | 23.82 | C   |
| ATOM | 662 | O   | MET | A | 87 | 21.884 | -18.629 | 10.092 | 1.00 | 22.28 | O   |
| ATOM | 663 | CB  | MET | A | 87 | 20.062 | -16.483 | 10.266 | 1.00 | 22.69 | C   |
| ATOM | 664 | CG  | MET | A | 87 | 19.281 | -15.254 | 10.625 | 1.00 | 21.49 | C   |
| ATOM | 665 | SD  | MET | A | 87 | 17.968 | -15.060 | 9.479  | 1.00 | 25.30 | S   |
| ATOM | 666 | CE  | MET | A | 87 | 17.164 | -13.558 | 10.089 | 1.00 | 25.45 | C   |
| ATOM | 667 | N   | ALA | A | 88 | 21.100 | -19.558 | 12.007 | 1.00 | 24.16 | N   |
| ATOM | 668 | CA  | ALA | A | 88 | 21.551 | -20.939 | 11.769 | 1.00 | 23.40 | C   |
| ATOM | 669 | C   | ALA | A | 88 | 20.674 | -21.671 | 10.750 | 1.00 | 22.19 | C   |
| ATOM | 670 | O   | ALA | A | 88 | 20.034 | -22.659 | 11.074 | 1.00 | 19.67 | O   |
| ATOM | 671 | CB  | ALA | A | 88 | 21.562 | -21.707 | 13.092 | 1.00 | 23.53 | C   |
| ATOM | 672 | N   | ASP | A | 89 | 20.914 | -21.344 | 9.489  | 1.00 | 24.31 | N   |
| ATOM | 673 | CA  | ASP | A | 89 | 19.989 | -21.540 | 8.373  | 1.00 | 26.76 | C   |
| ATOM | 674 | C   | ASP | A | 89 | 18.712 | -22.355 | 8.559  | 1.00 | 27.24 | C   |
| ATOM | 675 | O   | ASP | A | 89 | 18.747 | -23.479 | 9.048  | 1.00 | 28.36 | O   |
| ATOM | 676 | CB  | ASP | A | 89 | 20.745 | -22.081 | 7.155  | 1.00 | 29.44 | C   |
| ATOM | 677 | CG  | ASP | A | 89 | 20.619 | -21.162 | 5.954  | 1.00 | 33.40 | C   |
| ATOM | 678 | OD1 | ASP | A | 89 | 21.358 | -20.136 | 5.934  | 1.00 | 34.86 | O   |
| ATOM | 679 | OD2 | ASP | A | 89 | 19.716 | -21.401 | 5.103  | 1.00 | 29.72 | O1- |
| ATOM | 680 | N   | CYS | A | 90 | 17.732 | -21.971 | 7.752  | 1.00 | 27.38 | N   |
| ATOM | 681 | CA  | CYS | A | 90 | 16.343 | -22.307 | 8.008  | 1.00 | 26.95 | C   |
| ATOM | 682 | C   | CYS | A | 90 | 15.605 | -22.522 | 6.664  | 1.00 | 26.81 | C   |
| ATOM | 683 | O   | CYS | A | 90 | 14.461 | -22.077 | 6.485  | 1.00 | 28.42 | O   |
| ATOM | 684 | CB  | CYS | A | 90 | 15.719 | -21.154 | 8.799  | 1.00 | 27.53 | C   |
| ATOM | 685 | SG  | CYS | A | 90 | 14.094 | -21.429 | 9.556  | 1.00 | 25.39 | S   |
| ATOM | 686 | N   | CYS | A | 91 | 16.248 | -23.192 | 5.708  | 1.00 | 24.62 | N   |
| ATOM | 687 | CA  | CYS | A | 91 | 15.559 | -23.491 | 4.457  | 1.00 | 22.81 | C   |
| ATOM | 688 | C   | CYS | A | 91 | 15.315 | -24.990 | 4.337  | 1.00 | 21.96 | C   |
| ATOM | 689 | O   | CYS | A | 91 | 14.563 | -25.413 | 3.449  | 1.00 | 19.33 | O   |
| ATOM | 690 | CB  | CYS | A | 91 | 16.330 | -22.934 | 3.255  | 1.00 | 24.46 | C   |
| ATOM | 691 | SG  | CYS | A | 91 | 17.922 | -22.131 | 3.674  | 1.00 | 26.72 | S   |
| ATOM | 692 | N   | ALA | A | 92 | 15.547 | -25.641 | 5.480  | 1.00 | 20.50 | N   |
| ATOM | 693 | CA  | ALA | A | 92 | 15.453 | -27.100 | 5.702  | 1.00 | 21.22 | C   |
| ATOM | 694 | C   | ALA | A | 92 | 14.711 | -27.984 | 4.682  | 1.00 | 24.74 | C   |
| ATOM | 695 | O   | ALA | A | 92 | 15.053 | -27.983 | 3.494  | 1.00 | 24.03 | O   |
| ATOM | 696 | CB  | ALA | A | 92 | 14.900 | -27.358 | 7.109  | 1.00 | 19.84 | C   |
| ATOM | 697 | N   | LYS | A | 93 | 13.819 | -28.862 | 5.165  | 1.00 | 29.36 | N   |
| ATOM | 698 | CA  | LYS | A | 93 | 13.030 | -29.749 | 4.272  | 1.00 | 32.05 | C   |
| ATOM | 699 | C   | LYS | A | 93 | 11.829 | -28.986 | 3.713  | 1.00 | 32.90 | C   |
| ATOM | 700 | O   | LYS | A | 93 | 10.689 | -29.355 | 4.021  | 1.00 | 32.86 | O   |
| ATOM | 701 | CB  | LYS | A | 93 | 12.505 | -30.991 | 5.016  | 1.00 | 31.93 | C   |
| ATOM | 702 | CG  | LYS | A | 93 | 13.547 | -31.775 | 5.787  | 1.00 | 33.86 | C   |
| ATOM | 703 | CD  | LYS | A | 93 | 13.897 | -33.068 | 5.060  | 1.00 | 41.47 | C   |
| ATOM | 704 | CE  | LYS | A | 93 | 13.058 | -34.327 | 5.515  | 1.00 | 43.89 | C   |
| ATOM | 705 | NZ  | LYS | A | 93 | 13.324 | -35.551 | 4.649  | 1.00 | 41.62 | N1+ |
| ATOM | 706 | N   | GLN | A | 94 | 12.106 | -27.847 | 3.058  | 1.00 | 34.28 | N   |
| ATOM | 707 | CA  | GLN | A | 94 | 11.143 | -27.119 | 2.211  | 1.00 | 33.24 | C   |

|      |     |     |     |   |     |        |         |        |      |       |     |
|------|-----|-----|-----|---|-----|--------|---------|--------|------|-------|-----|
| ATOM | 708 | C   | GLN | A | 94  | 9.733  | -27.305 | 2.726  | 1.00 | 34.19 | C   |
| ATOM | 709 | O   | GLN | A | 94  | 9.042  | -28.292 | 2.385  | 1.00 | 33.84 | O   |
| ATOM | 710 | CB  | GLN | A | 94  | 11.233 | -27.588 | 0.762  | 1.00 | 31.80 | C   |
| ATOM | 711 | CG  | GLN | A | 94  | 10.790 | -26.549 | -0.236 | 1.00 | 34.94 | C   |
| ATOM | 712 | CD  | GLN | A | 94  | 11.426 | -26.732 | -1.637 | 1.00 | 38.30 | C   |
| ATOM | 713 | NE2 | GLN | A | 94  | 12.641 | -26.177 | -1.815 | 1.00 | 40.46 | N   |
| ATOM | 714 | OE1 | GLN | A | 94  | 10.825 | -27.321 | -2.563 | 1.00 | 32.88 | O   |
| ATOM | 715 | N   | GLU | A | 95  | 9.332  | -26.345 | 3.554  | 1.00 | 32.90 | N   |
| ATOM | 716 | CA  | GLU | A | 95  | 8.335  | -26.553 | 4.596  | 1.00 | 29.83 | C   |
| ATOM | 717 | C   | GLU | A | 95  | 7.742  | -25.193 | 4.953  | 1.00 | 27.35 | C   |
| ATOM | 718 | O   | GLU | A | 95  | 8.463  | -24.205 | 5.067  | 1.00 | 27.18 | O   |
| ATOM | 719 | CB  | GLU | A | 95  | 8.999  | -27.179 | 5.835  | 1.00 | 29.20 | C   |
| ATOM | 720 | CG  | GLU | A | 95  | 10.428 | -26.672 | 6.091  | 1.00 | 31.06 | C   |
| ATOM | 721 | CD  | GLU | A | 95  | 11.023 | -27.126 | 7.434  | 1.00 | 31.73 | C   |
| ATOM | 722 | OE1 | GLU | A | 95  | 10.421 | -28.009 | 8.097  | 1.00 | 33.07 | O   |
| ATOM | 723 | OE2 | GLU | A | 95  | 12.075 | -26.563 | 7.821  | 1.00 | 28.41 | O1- |
| ATOM | 724 | N   | PRO | A | 96  | 6.413  | -25.117 | 5.082  | 1.00 | 26.21 | N   |
| ATOM | 725 | CA  | PRO | A | 96  | 5.812  | -24.684 | 6.341  | 1.00 | 24.52 | C   |
| ATOM | 726 | C   | PRO | A | 96  | 6.808  | -24.184 | 7.407  | 1.00 | 25.14 | C   |
| ATOM | 727 | O   | PRO | A | 96  | 7.050  | -22.970 | 7.514  | 1.00 | 25.18 | O   |
| ATOM | 728 | CB  | PRO | A | 96  | 5.052  | -25.927 | 6.769  | 1.00 | 25.77 | C   |
| ATOM | 729 | CG  | PRO | A | 96  | 4.695  | -26.630 | 5.390  | 1.00 | 25.29 | C   |
| ATOM | 730 | CD  | PRO | A | 96  | 5.461  | -25.931 | 4.308  | 1.00 | 22.87 | C   |
| ATOM | 731 | N   | GLU | A | 97  | 7.471  | -25.114 | 8.099  | 1.00 | 25.87 | N   |
| ATOM | 732 | CA  | GLU | A | 97  | 8.490  | -24.774 | 9.105  | 1.00 | 24.65 | C   |
| ATOM | 733 | C   | GLU | A | 97  | 9.746  | -24.064 | 8.538  | 1.00 | 24.75 | C   |
| ATOM | 734 | O   | GLU | A | 97  | 10.841 | -24.176 | 9.090  | 1.00 | 25.54 | O   |
| ATOM | 735 | CB  | GLU | A | 97  | 8.900  | -26.035 | 9.903  | 1.00 | 22.10 | C   |
| ATOM | 736 | CG  | GLU | A | 97  | 9.205  | -25.768 | 11.382 | 1.00 | 20.67 | C   |
| ATOM | 737 | CD  | GLU | A | 97  | 9.771  | -26.971 | 12.146 | 1.00 | 21.89 | C   |
| ATOM | 738 | OE1 | GLU | A | 97  | 9.336  | -28.118 | 11.890 | 1.00 | 20.02 | O   |
| ATOM | 739 | OE2 | GLU | A | 97  | 10.584 | -26.752 | 13.080 | 1.00 | 21.31 | O1- |
| ATOM | 740 | N   | ARG | A | 98  | 9.603  | -23.344 | 7.433  | 1.00 | 25.09 | N   |
| ATOM | 741 | CA  | ARG | A | 98  | 10.673 | -22.458 | 7.010  | 1.00 | 25.81 | C   |
| ATOM | 742 | C   | ARG | A | 98  | 10.317 | -21.131 | 7.623  | 1.00 | 25.39 | C   |
| ATOM | 743 | O   | ARG | A | 98  | 10.978 | -20.710 | 8.581  | 1.00 | 24.60 | O   |
| ATOM | 744 | CB  | ARG | A | 98  | 10.787 | -22.358 | 5.466  | 1.00 | 28.52 | C   |
| ATOM | 745 | CG  | ARG | A | 98  | 10.015 | -21.212 | 4.761  | 1.00 | 29.53 | C   |
| ATOM | 746 | CD  | ARG | A | 98  | 9.578  | -21.625 | 3.364  | 1.00 | 32.14 | C   |
| ATOM | 747 | NE  | ARG | A | 98  | 8.122  | -21.618 | 3.201  | 1.00 | 35.46 | N   |
| ATOM | 748 | CZ  | ARG | A | 98  | 7.473  | -22.269 | 2.232  | 1.00 | 36.58 | C   |
| ATOM | 749 | NH1 | ARG | A | 98  | 8.153  | -23.041 | 1.390  | 1.00 | 34.88 | N1+ |
| ATOM | 750 | NH2 | ARG | A | 98  | 6.140  | -22.181 | 2.122  | 1.00 | 35.51 | N   |
| ATOM | 751 | N   | ASN | A | 99  | 9.118  | -20.641 | 7.289  | 1.00 | 24.15 | N   |
| ATOM | 752 | CA  | ASN | A | 99  | 8.828  | -19.225 | 7.492  | 1.00 | 23.31 | C   |
| ATOM | 753 | C   | ASN | A | 99  | 9.235  | -18.901 | 8.910  | 1.00 | 22.87 | C   |
| ATOM | 754 | O   | ASN | A | 99  | 10.205 | -18.165 | 9.103  | 1.00 | 20.69 | O   |
| ATOM | 755 | CB  | ASN | A | 99  | 7.347  | -18.902 | 7.287  | 1.00 | 22.49 | C   |
| ATOM | 756 | CG  | ASN | A | 99  | 7.134  | -17.493 | 6.738  | 1.00 | 24.38 | C   |
| ATOM | 757 | ND2 | ASN | A | 99  | 7.943  | -16.540 | 7.206  | 1.00 | 21.20 | N   |
| ATOM | 758 | OD1 | ASN | A | 99  | 6.321  | -17.287 | 5.821  | 1.00 | 28.44 | O   |
| ATOM | 759 | N   | GLU | A | 100 | 8.818  | -19.821 | 9.785  | 1.00 | 21.65 | N   |
| ATOM | 760 | CA  | GLU | A | 100 | 8.975  | -19.687 | 11.215 | 1.00 | 20.63 | C   |
| ATOM | 761 | C   | GLU | A | 100 | 10.448 | -19.660 | 11.578 | 1.00 | 22.84 | C   |
| ATOM | 762 | O   | GLU | A | 100 | 11.049 | -18.584 | 11.656 | 1.00 | 23.88 | O   |
| ATOM | 763 | CB  | GLU | A | 100 | 8.255  | -20.822 | 11.950 | 1.00 | 16.75 | C   |
| ATOM | 764 | CG  | GLU | A | 100 | 6.754  | -20.854 | 11.705 | 1.00 | 18.79 | C   |
| ATOM | 765 | CD  | GLU | A | 100 | 6.355  | -21.788 | 10.556 | 1.00 | 24.05 | C   |
| ATOM | 766 | OE1 | GLU | A | 100 | 6.735  | -22.979 | 10.603 | 1.00 | 23.63 | O   |
| ATOM | 767 | OE2 | GLU | A | 100 | 5.629  | -21.357 | 9.622  | 1.00 | 26.06 | O1- |
| ATOM | 768 | N   | CYS | A | 101 | 11.073 | -20.826 | 11.570 | 1.00 | 26.26 | N   |
| ATOM | 769 | CA  | CYS | A | 101 | 12.183 | -21.078 | 12.477 | 1.00 | 29.17 | C   |
| ATOM | 770 | C   | CYS | A | 101 | 13.170 | -19.962 | 12.458 | 1.00 | 28.71 | C   |
| ATOM | 771 | O   | CYS | A | 101 | 13.708 | -19.631 | 13.507 | 1.00 | 29.61 | O   |
| ATOM | 772 | CB  | CYS | A | 101 | 12.927 | -22.363 | 12.140 | 1.00 | 31.73 | C   |
| ATOM | 773 | SG  | CYS | A | 101 | 14.563 | -21.967 | 11.457 | 1.00 | 33.00 | S   |
| ATOM | 774 | N   | PHE | A | 102 | 13.459 | -19.419 | 11.274 | 1.00 | 29.99 | N   |
| ATOM | 775 | CA  | PHE | A | 102 | 14.339 | -18.251 | 11.208 | 1.00 | 30.99 | C   |
| ATOM | 776 | C   | PHE | A | 102 | 13.937 | -17.084 | 10.309 | 1.00 | 30.01 | C   |
| ATOM | 777 | O   | PHE | A | 102 | 14.198 | -15.929 | 10.646 | 1.00 | 31.09 | O   |
| ATOM | 778 | CB  | PHE | A | 102 | 15.794 | -18.669 | 10.927 | 1.00 | 29.15 | C   |

|      |     |     |     |   |     |        |         |        |      |       |     |
|------|-----|-----|-----|---|-----|--------|---------|--------|------|-------|-----|
| ATOM | 779 | CG  | PHE | A | 102 | 16.643 | -18.701 | 12.165 | 1.00 | 31.69 | C   |
| ATOM | 780 | CD1 | PHE | A | 102 | 16.206 | -18.063 | 13.325 | 1.00 | 31.15 | C   |
| ATOM | 781 | CD2 | PHE | A | 102 | 17.771 | -19.508 | 12.236 | 1.00 | 33.88 | C   |
| ATOM | 782 | CE1 | PHE | A | 102 | 16.858 | -18.244 | 14.537 | 1.00 | 33.52 | C   |
| ATOM | 783 | CE2 | PHE | A | 102 | 18.441 | -19.698 | 13.451 | 1.00 | 34.28 | C   |
| ATOM | 784 | CZ  | PHE | A | 102 | 17.979 | -19.066 | 14.605 | 1.00 | 35.49 | C   |
| ATOM | 785 | N   | LEU | A | 103 | 13.308 | -17.360 | 9.174  | 1.00 | 29.36 | N   |
| ATOM | 786 | CA  | LEU | A | 103 | 13.003 | -16.279 | 8.237  | 1.00 | 26.14 | C   |
| ATOM | 787 | C   | LEU | A | 103 | 11.972 | -15.389 | 8.900  | 1.00 | 25.93 | C   |
| ATOM | 788 | O   | LEU | A | 103 | 12.147 | -14.171 | 8.921  | 1.00 | 25.78 | O   |
| ATOM | 789 | CB  | LEU | A | 103 | 12.461 | -16.815 | 6.906  | 1.00 | 19.74 | C   |
| ATOM | 790 | CG  | LEU | A | 103 | 13.228 | -17.942 | 6.214  | 1.00 | 12.38 | C   |
| ATOM | 791 | CD1 | LEU | A | 103 | 12.638 | -18.120 | 4.854  | 1.00 | 9.21  | C   |
| ATOM | 792 | CD2 | LEU | A | 103 | 14.710 | -17.659 | 6.156  | 1.00 | 6.56  | C   |
| ATOM | 793 | N   | GLN | A | 104 | 11.085 | -16.014 | 9.683  | 1.00 | 25.30 | N   |
| ATOM | 794 | CA  | GLN | A | 104 | 10.052 | -15.283 | 10.414 | 1.00 | 25.11 | C   |
| ATOM | 795 | C   | GLN | A | 104 | 10.454 | -14.979 | 11.849 | 1.00 | 25.04 | C   |
| ATOM | 796 | O   | GLN | A | 104 | 9.587  | -14.855 | 12.719 | 1.00 | 24.08 | O   |
| ATOM | 797 | CB  | GLN | A | 104 | 8.742  | -16.057 | 10.419 | 1.00 | 24.18 | C   |
| ATOM | 798 | CG  | GLN | A | 104 | 7.502  | -15.185 | 10.263 | 1.00 | 26.71 | C   |
| ATOM | 799 | CD  | GLN | A | 104 | 6.727  | -14.995 | 11.555 | 1.00 | 27.66 | C   |
| ATOM | 800 | NE2 | GLN | A | 104 | 5.873  | -13.976 | 11.579 | 1.00 | 27.08 | N   |
| ATOM | 801 | OE1 | GLN | A | 104 | 6.884  | -15.758 | 12.520 | 1.00 | 26.58 | O   |
| ATOM | 802 | N   | HIS | A | 105 | 11.771 | -14.903 | 12.102 | 1.00 | 27.00 | N   |
| ATOM | 803 | CA  | HIS | A | 105 | 12.310 | -14.502 | 13.416 | 1.00 | 24.47 | C   |
| ATOM | 804 | C   | HIS | A | 105 | 13.366 | -13.402 | 13.432 | 1.00 | 21.96 | C   |
| ATOM | 805 | O   | HIS | A | 105 | 14.561 | -13.626 | 13.636 | 1.00 | 18.43 | O   |
| ATOM | 806 | CB  | HIS | A | 105 | 12.745 | -15.726 | 14.239 | 1.00 | 22.38 | C   |
| ATOM | 807 | CG  | HIS | A | 105 | 11.579 | -16.471 | 14.785 | 1.00 | 21.89 | C   |
| ATOM | 808 | CD2 | HIS | A | 105 | 10.375 | -16.007 | 15.196 | 1.00 | 21.60 | C   |
| ATOM | 809 | ND1 | HIS | A | 105 | 11.379 | -17.806 | 14.479 | 1.00 | 20.64 | N   |
| ATOM | 810 | CE1 | HIS | A | 105 | 10.095 | -18.100 | 14.625 | 1.00 | 22.23 | C   |
| ATOM | 811 | NE2 | HIS | A | 105 | 9.467  | -17.022 | 15.048 | 1.00 | 23.35 | N   |
| ATOM | 812 | N   | LYS | A | 106 | 12.917 | -12.304 | 12.860 | 1.00 | 19.95 | N   |
| ATOM | 813 | CA  | LYS | A | 106 | 12.919 | -11.020 | 13.530 | 1.00 | 19.97 | C   |
| ATOM | 814 | C   | LYS | A | 106 | 13.352 | -11.055 | 14.998 | 1.00 | 20.41 | C   |
| ATOM | 815 | O   | LYS | A | 106 | 12.569 | -11.484 | 15.844 | 1.00 | 19.74 | O   |
| ATOM | 816 | CB  | LYS | A | 106 | 11.509 | -10.434 | 13.441 | 1.00 | 18.97 | C   |
| ATOM | 817 | CG  | LYS | A | 106 | 10.855 | -10.624 | 12.077 | 1.00 | 14.34 | C   |
| ATOM | 818 | CD  | LYS | A | 106 | 9.593  | -9.822  | 11.956 | 1.00 | 12.34 | C   |
| ATOM | 819 | CE  | LYS | A | 106 | 8.917  | -10.071 | 10.618 | 1.00 | 15.93 | C   |
| ATOM | 820 | NZ  | LYS | A | 106 | 7.629  | -9.296  | 10.461 | 1.00 | 19.28 | N1+ |
| ATOM | 821 | N   | ASP | A | 107 | 14.647 | -10.804 | 15.235 | 1.00 | 20.45 | N   |
| ATOM | 822 | CA  | ASP | A | 107 | 15.129 | -10.023 | 16.386 | 1.00 | 19.31 | C   |
| ATOM | 823 | C   | ASP | A | 107 | 14.254 | -8.775  | 16.470 | 1.00 | 20.32 | C   |
| ATOM | 824 | O   | ASP | A | 107 | 13.725 | -8.318  | 15.464 | 1.00 | 18.89 | O   |
| ATOM | 825 | CB  | ASP | A | 107 | 16.582 | -9.589  | 16.168 | 1.00 | 18.38 | C   |
| ATOM | 826 | CG  | ASP | A | 107 | 17.324 | -9.293  | 17.468 | 1.00 | 20.19 | C   |
| ATOM | 827 | OD1 | ASP | A | 107 | 16.972 | -8.328  | 18.186 | 1.00 | 20.89 | O   |
| ATOM | 828 | OD2 | ASP | A | 107 | 18.343 | -9.964  | 17.709 | 1.00 | 20.24 | O1- |
| ATOM | 829 | N   | ASP | A | 108 | 14.062 | -8.248  | 17.673 | 1.00 | 22.88 | N   |
| ATOM | 830 | CA  | ASP | A | 108 | 12.971 | -7.310  | 17.867 | 1.00 | 24.38 | C   |
| ATOM | 831 | C   | ASP | A | 108 | 13.419 | -5.855  | 17.972 | 1.00 | 28.19 | C   |
| ATOM | 832 | O   | ASP | A | 108 | 13.842 | -5.278  | 16.979 | 1.00 | 34.68 | O   |
| ATOM | 833 | CB  | ASP | A | 108 | 12.119 | -7.724  | 19.066 | 1.00 | 21.46 | C   |
| ATOM | 834 | CG  | ASP | A | 108 | 10.665 | -7.323  | 18.893 | 1.00 | 21.67 | C   |
| ATOM | 835 | OD1 | ASP | A | 108 | 10.407 | -6.411  | 18.098 | 1.00 | 20.61 | O   |
| ATOM | 836 | OD2 | ASP | A | 108 | 9.792  | -7.901  | 19.583 | 1.00 | 24.35 | O1- |
| ATOM | 837 | N   | ASN | A | 109 | 13.182 | -5.218  | 19.110 | 1.00 | 28.47 | N   |
| ATOM | 838 | CA  | ASN | A | 109 | 13.326 | -3.763  | 19.264 | 1.00 | 28.03 | C   |
| ATOM | 839 | C   | ASN | A | 109 | 14.728 | -3.298  | 18.833 | 1.00 | 28.47 | C   |
| ATOM | 840 | O   | ASN | A | 109 | 15.003 | -3.159  | 17.631 | 1.00 | 29.63 | O   |
| ATOM | 841 | CB  | ASN | A | 109 | 13.100 | -3.463  | 20.742 | 1.00 | 30.55 | C   |
| ATOM | 842 | CG  | ASN | A | 109 | 12.170 | -2.307  | 20.987 | 1.00 | 30.28 | C   |
| ATOM | 843 | ND2 | ASN | A | 109 | 11.029 | -2.303  | 20.315 | 1.00 | 34.20 | N   |
| ATOM | 844 | OD1 | ASN | A | 109 | 12.411 | -1.514  | 21.893 | 1.00 | 28.96 | O   |
| ATOM | 845 | N   | PRO | A | 110 | 15.632 | -3.006  | 19.797 | 1.00 | 27.35 | N   |
| ATOM | 846 | CA  | PRO | A | 110 | 16.964 | -3.597  | 19.834 | 1.00 | 27.24 | C   |
| ATOM | 847 | C   | PRO | A | 110 | 17.241 | -4.929  | 19.113 | 1.00 | 29.36 | C   |
| ATOM | 848 | O   | PRO | A | 110 | 17.484 | -6.001  | 19.740 | 1.00 | 29.54 | O   |
| ATOM | 849 | CB  | PRO | A | 110 | 17.284 | -3.559  | 21.317 | 1.00 | 25.13 | C   |

|      |     |     |     |   |     |        |        |        |      |       |     |
|------|-----|-----|-----|---|-----|--------|--------|--------|------|-------|-----|
| ATOM | 850 | CG  | PRO | A | 110 | 16.640 | -2.142 | 21.702 | 1.00 | 25.75 | C   |
| ATOM | 851 | CD  | PRO | A | 110 | 15.683 | -1.751 | 20.558 | 1.00 | 24.19 | C   |
| ATOM | 852 | N   | ASN | A | 111 | 17.144 | -4.835 | 17.781 | 1.00 | 27.97 | N   |
| ATOM | 853 | CA  | ASN | A | 111 | 18.078 | -5.469 | 16.846 | 1.00 | 24.32 | C   |
| ATOM | 854 | C   | ASN | A | 111 | 19.394 | -4.725 | 16.826 | 1.00 | 22.19 | C   |
| ATOM | 855 | O   | ASN | A | 111 | 19.509 | -3.710 | 17.495 | 1.00 | 19.34 | O   |
| ATOM | 856 | CB  | ASN | A | 111 | 17.515 | -5.455 | 15.440 | 1.00 | 21.73 | C   |
| ATOM | 857 | CG  | ASN | A | 111 | 16.979 | -4.106 | 15.050 | 1.00 | 19.05 | C   |
| ATOM | 858 | ND2 | ASN | A | 111 | 17.263 | -3.075 | 15.851 | 1.00 | 14.84 | N   |
| ATOM | 859 | OD1 | ASN | A | 111 | 16.299 | -3.992 | 14.035 | 1.00 | 22.36 | O   |
| ATOM | 860 | N   | LEU | A | 112 | 20.147 | -4.978 | 15.759 | 1.00 | 24.65 | N   |
| ATOM | 861 | CA  | LEU | A | 112 | 21.611 | -4.907 | 15.800 | 1.00 | 26.73 | C   |
| ATOM | 862 | C   | LEU | A | 112 | 22.172 | -3.568 | 15.277 | 1.00 | 26.67 | C   |
| ATOM | 863 | O   | LEU | A | 112 | 21.839 | -2.531 | 15.854 | 1.00 | 23.61 | O   |
| ATOM | 864 | CB  | LEU | A | 112 | 22.185 | -6.148 | 15.089 | 1.00 | 27.52 | C   |
| ATOM | 865 | CG  | LEU | A | 112 | 23.017 | -7.089 | 15.972 | 1.00 | 31.09 | C   |
| ATOM | 866 | CD1 | LEU | A | 112 | 22.946 | -8.557 | 15.481 | 1.00 | 26.90 | C   |
| ATOM | 867 | CD2 | LEU | A | 112 | 24.458 | -6.546 | 16.003 | 1.00 | 29.65 | C   |
| ATOM | 868 | N   | PRO | A | 113 | 23.112 | -3.565 | 14.288 | 1.00 | 29.08 | N   |
| ATOM | 869 | CA  | PRO | A | 113 | 23.734 | -2.245 | 14.101 | 1.00 | 31.20 | C   |
| ATOM | 870 | C   | PRO | A | 113 | 22.679 | -1.238 | 13.619 | 1.00 | 33.56 | C   |
| ATOM | 871 | O   | PRO | A | 113 | 21.661 | -1.636 | 12.981 | 1.00 | 31.23 | O   |
| ATOM | 872 | CB  | PRO | A | 113 | 24.818 | -2.486 | 13.030 | 1.00 | 29.19 | C   |
| ATOM | 873 | CG  | PRO | A | 113 | 24.576 | -3.877 | 12.496 | 1.00 | 28.17 | C   |
| ATOM | 874 | CD  | PRO | A | 113 | 23.241 | -4.343 | 13.047 | 1.00 | 29.64 | C   |
| ATOM | 875 | N   | ARG | A | 114 | 22.928 | 0.050  | 13.928 | 1.00 | 33.99 | N   |
| ATOM | 876 | CA  | ARG | A | 114 | 21.881 | 1.077  | 13.890 | 1.00 | 32.55 | C   |
| ATOM | 877 | C   | ARG | A | 114 | 22.292 | 2.540  | 13.957 | 1.00 | 32.21 | C   |
| ATOM | 878 | O   | ARG | A | 114 | 21.575 | 3.391  | 13.430 | 1.00 | 31.11 | O   |
| ATOM | 879 | CB  | ARG | A | 114 | 20.905 | 0.809  | 15.017 | 1.00 | 33.18 | C   |
| ATOM | 880 | CG  | ARG | A | 114 | 19.953 | -0.281 | 14.661 | 1.00 | 36.64 | C   |
| ATOM | 881 | CD  | ARG | A | 114 | 19.020 | -0.467 | 15.750 | 1.00 | 39.87 | C   |
| ATOM | 882 | NE  | ARG | A | 114 | 18.517 | 0.826  | 16.159 | 1.00 | 43.15 | N   |
| ATOM | 883 | CZ  | ARG | A | 114 | 17.756 | 0.977  | 17.222 | 1.00 | 47.64 | C   |
| ATOM | 884 | NH1 | ARG | A | 114 | 17.324 | -0.119 | 17.852 | 1.00 | 51.30 | N1+ |
| ATOM | 885 | NH2 | ARG | A | 114 | 17.373 | 2.192  | 17.608 | 1.00 | 50.22 | N   |
| ATOM | 886 | N   | LEU | A | 115 | 23.284 | 2.864  | 14.788 | 1.00 | 33.02 | N   |
| ATOM | 887 | CA  | LEU | A | 115 | 23.491 | 4.243  | 15.202 | 1.00 | 33.18 | C   |
| ATOM | 888 | C   | LEU | A | 115 | 23.305 | 5.255  | 14.059 | 1.00 | 34.71 | C   |
| ATOM | 889 | O   | LEU | A | 115 | 22.386 | 6.065  | 14.145 | 1.00 | 35.24 | O   |
| ATOM | 890 | CB  | LEU | A | 115 | 24.860 | 4.423  | 15.860 | 1.00 | 32.34 | C   |
| ATOM | 891 | CG  | LEU | A | 115 | 25.037 | 5.442  | 17.017 | 1.00 | 31.68 | C   |
| ATOM | 892 | CD1 | LEU | A | 115 | 26.534 | 5.671  | 17.168 | 1.00 | 29.02 | C   |
| ATOM | 893 | CD2 | LEU | A | 115 | 24.324 | 6.786  | 16.764 | 1.00 | 26.36 | C   |
| ATOM | 894 | N   | VAL | A | 116 | 24.007 | 5.019  | 12.919 | 1.00 | 35.67 | N   |
| ATOM | 895 | CA  | VAL | A | 116 | 24.061 | 5.935  | 11.756 | 1.00 | 36.09 | C   |
| ATOM | 896 | C   | VAL | A | 116 | 22.692 | 6.478  | 11.298 | 1.00 | 37.34 | C   |
| ATOM | 897 | O   | VAL | A | 116 | 21.657 | 6.293  | 11.959 | 1.00 | 39.54 | O   |
| ATOM | 898 | CB  | VAL | A | 116 | 24.705 | 5.248  | 10.482 | 1.00 | 34.24 | C   |
| ATOM | 899 | CG1 | VAL | A | 116 | 26.241 | 4.937  | 10.734 | 1.00 | 33.93 | C   |
| ATOM | 900 | CG2 | VAL | A | 116 | 23.974 | 3.954  | 10.123 | 1.00 | 30.72 | C   |
| ATOM | 901 | N   | ARG | A | 117 | 22.732 | 7.203  | 10.185 | 1.00 | 37.72 | N   |
| ATOM | 902 | CA  | ARG | A | 117 | 21.486 | 7.644  | 9.511  | 1.00 | 40.29 | C   |
| ATOM | 903 | C   | ARG | A | 117 | 21.917 | 8.611  | 8.413  | 1.00 | 39.62 | C   |
| ATOM | 904 | O   | ARG | A | 117 | 23.104 | 8.596  | 8.037  | 1.00 | 41.35 | O   |
| ATOM | 905 | CB  | ARG | A | 117 | 20.547 | 8.386  | 10.490 | 1.00 | 42.16 | C   |
| ATOM | 906 | CG  | ARG | A | 117 | 19.116 | 7.763  | 10.656 | 1.00 | 46.39 | C   |
| ATOM | 907 | CD  | ARG | A | 117 | 18.704 | 7.899  | 12.134 | 1.00 | 51.79 | C   |
| ATOM | 908 | NE  | ARG | A | 117 | 19.092 | 9.229  | 12.637 | 1.00 | 56.27 | N   |
| ATOM | 909 | CZ  | ARG | A | 117 | 18.282 | 10.024 | 13.353 | 1.00 | 57.56 | C   |
| ATOM | 910 | NH1 | ARG | A | 117 | 18.086 | 11.271 | 12.915 | 1.00 | 57.16 | N1+ |
| ATOM | 911 | NH2 | ARG | A | 117 | 18.065 | 9.782  | 14.657 | 1.00 | 55.96 | N   |
| ATOM | 912 | N   | PRO | A | 118 | 20.982 | 9.415  | 7.863  | 1.00 | 37.83 | N   |
| ATOM | 913 | CA  | PRO | A | 118 | 21.179 | 10.738 | 7.262  | 1.00 | 38.11 | C   |
| ATOM | 914 | C   | PRO | A | 118 | 21.640 | 11.818 | 8.236  | 1.00 | 36.72 | C   |
| ATOM | 915 | O   | PRO | A | 118 | 21.590 | 11.611 | 9.463  | 1.00 | 38.18 | O   |
| ATOM | 916 | CB  | PRO | A | 118 | 19.774 | 11.075 | 6.712  | 1.00 | 38.53 | C   |
| ATOM | 917 | CG  | PRO | A | 118 | 18.892 | 10.088 | 7.386  | 1.00 | 38.63 | C   |
| ATOM | 918 | CD  | PRO | A | 118 | 19.697 | 8.870  | 7.443  | 1.00 | 37.42 | C   |
| ATOM | 919 | N   | GLU | A | 119 | 21.806 | 13.037 | 7.693  | 1.00 | 34.77 | N   |
| ATOM | 920 | CA  | GLU | A | 119 | 22.310 | 14.182 | 8.455  | 1.00 | 33.84 | C   |

|      |     |     |     |   |     |        |        |         |      |       |     |
|------|-----|-----|-----|---|-----|--------|--------|---------|------|-------|-----|
| ATOM | 921 | C   | GLU | A | 119 | 22.333 | 15.588 | 7.791   | 1.00 | 31.31 | C   |
| ATOM | 922 | O   | GLU | A | 119 | 21.800 | 15.762 | 6.680   | 1.00 | 27.96 | O   |
| ATOM | 923 | CB  | GLU | A | 119 | 23.684 | 13.859 | 9.039   | 1.00 | 34.16 | C   |
| ATOM | 924 | CG  | GLU | A | 119 | 23.650 | 13.731 | 10.573  | 1.00 | 29.57 | C   |
| ATOM | 925 | CD  | GLU | A | 119 | 23.678 | 15.084 | 11.263  | 1.00 | 27.59 | C   |
| ATOM | 926 | OE1 | GLU | A | 119 | 24.804 | 15.594 | 11.417  | 1.00 | 25.30 | O   |
| ATOM | 927 | OE2 | GLU | A | 119 | 22.602 | 15.581 | 11.689  | 1.00 | 21.70 | O1- |
| ATOM | 928 | N   | VAL | A | 120 | 23.119 | 16.516 | 8.368   | 1.00 | 29.09 | N   |
| ATOM | 929 | CA  | VAL | A | 120 | 22.754 | 17.938 | 8.468   | 1.00 | 27.70 | C   |
| ATOM | 930 | C   | VAL | A | 120 | 21.995 | 18.387 | 7.264   | 1.00 | 27.84 | C   |
| ATOM | 931 | O   | VAL | A | 120 | 20.779 | 18.514 | 7.318   | 1.00 | 29.90 | O   |
| ATOM | 932 | CB  | VAL | A | 120 | 23.973 | 18.925 | 8.622   | 1.00 | 27.28 | C   |
| ATOM | 933 | CG1 | VAL | A | 120 | 23.965 | 19.580 | 10.005  | 1.00 | 25.95 | C   |
| ATOM | 934 | CG2 | VAL | A | 120 | 25.309 | 18.221 | 8.353   | 1.00 | 27.55 | C   |
| ATOM | 935 | N   | ASP | A | 121 | 22.688 | 18.398 | 6.131   | 1.00 | 28.02 | N   |
| ATOM | 936 | CA  | ASP | A | 121 | 22.234 | 19.108 | 4.946   | 1.00 | 26.82 | C   |
| ATOM | 937 | C   | ASP | A | 121 | 21.939 | 18.197 | 3.749   | 1.00 | 25.21 | C   |
| ATOM | 938 | O   | ASP | A | 121 | 21.035 | 18.483 | 2.953   | 1.00 | 23.24 | O   |
| ATOM | 939 | CB  | ASP | A | 121 | 23.247 | 20.212 | 4.560   | 1.00 | 25.99 | C   |
| ATOM | 940 | CG  | ASP | A | 121 | 24.676 | 19.899 | 5.019   | 1.00 | 26.35 | C   |
| ATOM | 941 | OD1 | ASP | A | 121 | 25.271 | 18.950 | 4.459   | 1.00 | 27.73 | O   |
| ATOM | 942 | OD2 | ASP | A | 121 | 25.210 | 20.583 | 5.923   | 1.00 | 21.53 | O1- |
| ATOM | 943 | N   | VAL | A | 122 | 22.591 | 17.041 | 3.682   | 1.00 | 23.49 | N   |
| ATOM | 944 | CA  | VAL | A | 122 | 22.769 | 16.383 | 2.386   | 1.00 | 25.51 | C   |
| ATOM | 945 | C   | VAL | A | 122 | 21.644 | 15.468 | 1.927   | 1.00 | 26.41 | C   |
| ATOM | 946 | O   | VAL | A | 122 | 21.527 | 15.180 | 0.732   | 1.00 | 25.53 | O   |
| ATOM | 947 | CB  | VAL | A | 122 | 24.124 | 15.616 | 2.299   | 1.00 | 25.87 | C   |
| ATOM | 948 | CG1 | VAL | A | 122 | 24.962 | 15.857 | 3.561   | 1.00 | 27.67 | C   |
| ATOM | 949 | CG2 | VAL | A | 122 | 23.896 | 14.114 | 2.031   | 1.00 | 25.34 | C   |
| ATOM | 950 | N   | MET | A | 123 | 20.814 | 15.019 | 2.867   | 1.00 | 29.60 | N   |
| ATOM | 951 | CA  | MET | A | 123 | 19.863 | 13.932 | 2.601   | 1.00 | 30.15 | C   |
| ATOM | 952 | C   | MET | A | 123 | 18.835 | 14.384 | 1.578   | 1.00 | 32.67 | C   |
| ATOM | 953 | O   | MET | A | 123 | 18.100 | 13.549 | 1.034   | 1.00 | 33.77 | O   |
| ATOM | 954 | CB  | MET | A | 123 | 19.148 | 13.469 | 3.889   | 1.00 | 27.54 | C   |
| ATOM | 955 | CG  | MET | A | 123 | 17.910 | 14.282 | 4.295   | 1.00 | 25.66 | C   |
| ATOM | 956 | SD  | MET | A | 123 | 18.202 | 15.511 | 5.615   | 1.00 | 22.74 | S   |
| ATOM | 957 | CE  | MET | A | 123 | 16.615 | 16.318 | 5.641   | 1.00 | 22.28 | C   |
| ATOM | 958 | N   | CYS | A | 124 | 18.756 | 15.707 | 1.361   | 1.00 | 32.18 | N   |
| ATOM | 959 | CA  | CYS | A | 124 | 17.895 | 16.302 | 0.328   | 1.00 | 29.82 | C   |
| ATOM | 960 | C   | CYS | A | 124 | 18.423 | 15.917 | -1.060  | 1.00 | 27.70 | C   |
| ATOM | 961 | O   | CYS | A | 124 | 19.457 | 16.417 | -1.503  | 1.00 | 27.67 | O   |
| ATOM | 962 | CB  | CYS | A | 124 | 17.879 | 17.819 | 0.455   | 1.00 | 27.21 | C   |
| ATOM | 963 | SG  | CYS | A | 124 | 17.768 | 18.608 | -1.174  | 1.00 | 27.90 | S   |
| ATOM | 964 | N   | ALA | A | 126 | 16.357 | 14.257 | -3.975  | 1.00 | 22.43 | N   |
| ATOM | 965 | CA  | ALA | A | 126 | 15.531 | 13.862 | -5.118  | 1.00 | 26.10 | C   |
| ATOM | 966 | C   | ALA | A | 126 | 16.012 | 14.663 | -6.335  | 1.00 | 27.83 | C   |
| ATOM | 967 | O   | ALA | A | 126 | 15.423 | 15.699 | -6.716  | 1.00 | 28.31 | O   |
| ATOM | 968 | CB  | ALA | A | 126 | 14.054 | 14.116 | -4.848  | 1.00 | 27.88 | C   |
| ATOM | 969 | N   | PHE | A | 127 | 17.206 | 14.284 | -6.793  | 1.00 | 27.19 | N   |
| ATOM | 970 | CA  | PHE | A | 127 | 17.877 | 14.923 | -7.916  | 1.00 | 25.57 | C   |
| ATOM | 971 | C   | PHE | A | 127 | 18.309 | 13.827 | -8.896  | 1.00 | 25.18 | C   |
| ATOM | 972 | O   | PHE | A | 127 | 17.915 | 13.833 | -10.062 | 1.00 | 24.40 | O   |
| ATOM | 973 | CB  | PHE | A | 127 | 19.107 | 15.705 | -7.422  | 1.00 | 25.50 | C   |
| ATOM | 974 | CG  | PHE | A | 127 | 18.819 | 16.683 | -6.298  | 1.00 | 24.31 | C   |
| ATOM | 975 | CD1 | PHE | A | 127 | 17.616 | 17.361 | -6.224  | 1.00 | 23.10 | C   |
| ATOM | 976 | CD2 | PHE | A | 127 | 19.761 | 16.911 | -5.307  | 1.00 | 24.98 | C   |
| ATOM | 977 | CE1 | PHE | A | 127 | 17.356 | 18.229 | -5.169  | 1.00 | 24.24 | C   |
| ATOM | 978 | CE2 | PHE | A | 127 | 19.507 | 17.792 | -4.260  | 1.00 | 23.55 | C   |
| ATOM | 979 | CZ  | PHE | A | 127 | 18.304 | 18.442 | -4.188  | 1.00 | 22.96 | C   |
| ATOM | 980 | N   | HIS | A | 128 | 19.093 | 12.872 | -8.395  | 1.00 | 23.97 | N   |
| ATOM | 981 | CA  | HIS | A | 128 | 19.603 | 11.748 | -9.190  | 1.00 | 25.06 | C   |
| ATOM | 982 | C   | HIS | A | 128 | 19.666 | 10.507 | -8.299  | 1.00 | 25.79 | C   |
| ATOM | 983 | O   | HIS | A | 128 | 20.736 | 9.885  | -8.155  | 1.00 | 24.46 | O   |
| ATOM | 984 | CB  | HIS | A | 128 | 21.006 | 12.060 | -9.762  | 1.00 | 26.48 | C   |
| ATOM | 985 | CG  | HIS | A | 128 | 21.630 | 10.926 | -10.528 | 1.00 | 26.14 | C   |
| ATOM | 986 | CD2 | HIS | A | 128 | 21.599 | 10.603 | -11.842 | 1.00 | 26.98 | C   |
| ATOM | 987 | ND1 | HIS | A | 128 | 22.404 | 9.955  | -9.919  | 1.00 | 25.60 | N   |
| ATOM | 988 | CE1 | HIS | A | 128 | 22.814 | 9.086  | -10.824 | 1.00 | 25.56 | C   |
| ATOM | 989 | NE2 | HIS | A | 128 | 22.341 | 9.456  | -11.999 | 1.00 | 26.11 | N   |
| ATOM | 990 | N   | ASP | A | 129 | 18.631 | 10.376 | -7.473  | 1.00 | 25.20 | N   |
| ATOM | 991 | CA  | ASP | A | 129 | 18.171 | 9.095  | -6.944  | 1.00 | 23.48 | C   |



|      |      |     |     |   |     |        |        |        |      |       |     |
|------|------|-----|-----|---|-----|--------|--------|--------|------|-------|-----|
| ATOM | 992  | C   | ASP | A | 129 | 17.157 | 9.345  | -5.843 | 1.00 | 24.69 | C   |
| ATOM | 993  | O   | ASP | A | 129 | 17.123 | 10.429 | -5.245 | 1.00 | 22.84 | O   |
| ATOM | 994  | CB  | ASP | A | 129 | 19.312 | 8.207  | -6.401 | 1.00 | 22.35 | C   |
| ATOM | 995  | CG  | ASP | A | 129 | 20.159 | 8.879  | -5.310 | 1.00 | 19.90 | C   |
| ATOM | 996  | OD1 | ASP | A | 129 | 19.796 | 9.960  | -4.801 | 1.00 | 16.62 | O   |
| ATOM | 997  | OD2 | ASP | A | 129 | 21.216 | 8.304  | -4.963 | 1.00 | 18.41 | O1- |
| ATOM | 998  | N   | GLU | A | 131 | 16.294 | 6.107  | -4.845 | 1.00 | 26.76 | N   |
| ATOM | 999  | CA  | GLU | A | 131 | 16.936 | 4.947  | -4.238 | 1.00 | 26.85 | C   |
| ATOM | 1000 | C   | GLU | A | 131 | 17.501 | 5.427  | -2.883 | 1.00 | 26.10 | C   |
| ATOM | 1001 | O   | GLU | A | 131 | 17.117 | 4.893  | -1.861 | 1.00 | 25.45 | O   |
| ATOM | 1002 | CB  | GLU | A | 131 | 18.035 | 4.384  | -5.180 | 1.00 | 25.89 | C   |
| ATOM | 1003 | CG  | GLU | A | 131 | 17.551 | 3.445  | -6.329 | 1.00 | 21.04 | C   |
| ATOM | 1004 | CD  | GLU | A | 131 | 16.340 | 3.971  | -7.147 | 1.00 | 22.14 | C   |
| ATOM | 1005 | OE1 | GLU | A | 131 | 16.533 | 4.847  | -8.019 | 1.00 | 19.96 | O   |
| ATOM | 1006 | OE2 | GLU | A | 131 | 15.222 | 3.409  | -7.018 | 1.00 | 19.19 | O1- |
| ATOM | 1007 | N   | GLU | A | 132 | 18.176 | 6.583  | -2.862 | 1.00 | 27.14 | N   |
| ATOM | 1008 | CA  | GLU | A | 132 | 18.411 | 7.302  | -1.593 | 1.00 | 27.48 | C   |
| ATOM | 1009 | C   | GLU | A | 132 | 17.082 | 7.842  | -1.037 | 1.00 | 28.11 | C   |
| ATOM | 1010 | O   | GLU | A | 132 | 16.106 | 7.962  | -1.754 | 1.00 | 24.38 | O   |
| ATOM | 1011 | CB  | GLU | A | 132 | 19.392 | 8.487  | -1.758 | 1.00 | 26.09 | C   |
| ATOM | 1012 | CG  | GLU | A | 132 | 20.903 | 8.155  | -1.682 | 1.00 | 25.28 | C   |
| ATOM | 1013 | CD  | GLU | A | 132 | 21.435 | 7.896  | -0.264 | 1.00 | 21.57 | C   |
| ATOM | 1014 | OE1 | GLU | A | 132 | 21.255 | 6.778  | 0.262  | 1.00 | 19.27 | O   |
| ATOM | 1015 | OE2 | GLU | A | 132 | 22.139 | 8.767  | 0.272  | 1.00 | 15.77 | O1- |
| ATOM | 1016 | N   | THR | A | 133 | 17.137 | 8.383  | 0.170  | 1.00 | 30.85 | N   |
| ATOM | 1017 | CA  | THR | A | 133 | 15.943 | 8.621  | 0.974  | 1.00 | 33.25 | C   |
| ATOM | 1018 | C   | THR | A | 133 | 14.702 | 7.774  | 0.628  | 1.00 | 34.75 | C   |
| ATOM | 1019 | O   | THR | A | 133 | 14.606 | 6.619  | 1.090  | 1.00 | 36.23 | O   |
| ATOM | 1020 | CB  | THR | A | 133 | 15.615 | 10.107 | 0.979  | 1.00 | 34.23 | C   |
| ATOM | 1021 | CG2 | THR | A | 133 | 16.767 | 10.868 | 1.680  | 1.00 | 36.08 | C   |
| ATOM | 1022 | OG1 | THR | A | 133 | 15.497 | 10.586 | -0.370 | 1.00 | 35.21 | O   |
| ATOM | 1023 | N   | PHE | A | 134 | 13.798 | 8.301  | -0.209 | 1.00 | 34.14 | N   |
| ATOM | 1024 | CA  | PHE | A | 134 | 12.474 | 7.689  | -0.444 | 1.00 | 32.44 | C   |
| ATOM | 1025 | C   | PHE | A | 134 | 12.485 | 6.162  | -0.360 | 1.00 | 32.71 | C   |
| ATOM | 1026 | O   | PHE | A | 134 | 11.952 | 5.604  | 0.584  | 1.00 | 35.71 | O   |
| ATOM | 1027 | CB  | PHE | A | 134 | 11.886 | 8.175  | -1.787 | 1.00 | 30.94 | C   |
| ATOM | 1028 | CG  | PHE | A | 134 | 11.252 | 7.086  | -2.630 | 1.00 | 29.00 | C   |
| ATOM | 1029 | CD1 | PHE | A | 134 | 10.070 | 6.474  | -2.245 | 1.00 | 30.88 | C   |
| ATOM | 1030 | CD2 | PHE | A | 134 | 11.853 | 6.672  | -3.805 | 1.00 | 28.45 | C   |
| ATOM | 1031 | CE1 | PHE | A | 134 | 9.508  | 5.473  | -3.015 | 1.00 | 29.95 | C   |
| ATOM | 1032 | CE2 | PHE | A | 134 | 11.302 | 5.674  | -4.585 | 1.00 | 28.90 | C   |
| ATOM | 1033 | CZ  | PHE | A | 134 | 10.132 | 5.074  | -4.191 | 1.00 | 31.63 | C   |
| ATOM | 1034 | N   | LEU | A | 135 | 13.227 | 5.508  | -1.242 | 1.00 | 32.49 | N   |
| ATOM | 1035 | CA  | LEU | A | 135 | 13.400 | 4.061  | -1.193 | 1.00 | 32.55 | C   |
| ATOM | 1036 | C   | LEU | A | 135 | 14.020 | 3.666  | 0.150  | 1.00 | 32.40 | C   |
| ATOM | 1037 | O   | LEU | A | 135 | 13.384 | 2.984  | 0.946  | 1.00 | 33.86 | O   |
| ATOM | 1038 | CB  | LEU | A | 135 | 14.295 | 3.623  | -2.362 | 1.00 | 34.15 | C   |
| ATOM | 1039 | CG  | LEU | A | 135 | 14.898 | 2.211  | -2.532 | 1.00 | 37.12 | C   |
| ATOM | 1040 | CD1 | LEU | A | 135 | 14.673 | 1.676  | -3.994 | 1.00 | 35.21 | C   |
| ATOM | 1041 | CD2 | LEU | A | 135 | 16.396 | 2.278  | -2.232 | 1.00 | 33.42 | C   |
| ATOM | 1042 | N   | LYS | A | 136 | 15.169 | 4.258  | 0.477  | 1.00 | 32.96 | N   |
| ATOM | 1043 | CA  | LYS | A | 136 | 15.967 | 3.890  | 1.662  | 1.00 | 31.27 | C   |
| ATOM | 1044 | C   | LYS | A | 136 | 15.382 | 4.437  | 2.974  | 1.00 | 30.10 | C   |
| ATOM | 1045 | O   | LYS | A | 136 | 16.095 | 4.623  | 3.975  | 1.00 | 27.30 | O   |
| ATOM | 1046 | CB  | LYS | A | 136 | 17.429 | 4.370  | 1.501  | 1.00 | 30.80 | C   |
| ATOM | 1047 | CG  | LYS | A | 136 | 18.317 | 3.488  | 0.613  | 1.00 | 25.87 | C   |
| ATOM | 1048 | CD  | LYS | A | 136 | 19.724 | 4.099  | 0.430  | 1.00 | 25.64 | C   |
| ATOM | 1049 | CE  | LYS | A | 136 | 20.846 | 3.309  | 1.182  | 1.00 | 21.64 | C   |
| ATOM | 1050 | NZ  | LYS | A | 136 | 22.219 | 3.921  | 1.063  | 1.00 | 11.74 | N1+ |
| ATOM | 1051 | N   | LYS | A | 137 | 14.073 | 4.642  | 2.986  | 1.00 | 28.98 | N   |
| ATOM | 1052 | CA  | LYS | A | 137 | 13.340 | 4.610  | 4.251  | 1.00 | 27.29 | C   |
| ATOM | 1053 | C   | LYS | A | 137 | 12.719 | 3.231  | 4.562  | 1.00 | 25.01 | C   |
| ATOM | 1054 | O   | LYS | A | 137 | 11.769 | 3.148  | 5.343  | 1.00 | 19.88 | O   |
| ATOM | 1055 | CB  | LYS | A | 137 | 12.267 | 5.703  | 4.278  | 1.00 | 27.89 | C   |
| ATOM | 1056 | CG  | LYS | A | 137 | 11.043 | 5.458  | 3.424  | 1.00 | 25.43 | C   |
| ATOM | 1057 | CD  | LYS | A | 137 | 10.013 | 6.549  | 3.657  | 1.00 | 24.61 | C   |
| ATOM | 1058 | CE  | LYS | A | 137 | 9.532  | 6.581  | 5.121  | 1.00 | 25.80 | C   |
| ATOM | 1059 | NZ  | LYS | A | 137 | 10.478 | 7.205  | 6.080  | 1.00 | 22.10 | N1+ |
| ATOM | 1060 | N   | TYR | A | 138 | 13.261 | 2.170  | 3.944  | 1.00 | 23.60 | N   |
| ATOM | 1061 | CA  | TYR | A | 138 | 12.987 | 0.797  | 4.367  | 1.00 | 23.57 | C   |
| ATOM | 1062 | C   | TYR | A | 138 | 14.201 | -0.014 | 4.898  | 1.00 | 25.14 | C   |

|      |      |     |     |   |     |        |        |        |      |       |     |
|------|------|-----|-----|---|-----|--------|--------|--------|------|-------|-----|
| ATOM | 1063 | O   | TYR | A | 138 | 14.157 | -0.518 | 6.019  | 1.00 | 26.51 | O   |
| ATOM | 1064 | CB  | TYR | A | 138 | 12.287 | 0.013  | 3.262  | 1.00 | 23.90 | C   |
| ATOM | 1065 | CG  | TYR | A | 138 | 11.095 | 0.708  | 2.626  | 1.00 | 23.12 | C   |
| ATOM | 1066 | CD1 | TYR | A | 138 | 10.272 | 1.532  | 3.375  | 1.00 | 21.31 | C   |
| ATOM | 1067 | CD2 | TYR | A | 138 | 10.950 | 0.725  | 1.238  | 1.00 | 20.04 | C   |
| ATOM | 1068 | CE1 | TYR | A | 138 | 9.396  | 2.388  | 2.764  | 1.00 | 21.87 | C   |
| ATOM | 1069 | CE2 | TYR | A | 138 | 10.096 | 1.584  | 0.627  | 1.00 | 18.89 | C   |
| ATOM | 1070 | CZ  | TYR | A | 138 | 9.347  | 2.451  | 1.385  | 1.00 | 19.37 | C   |
| ATOM | 1071 | OH  | TYR | A | 138 | 8.863  | 3.599  | 0.796  | 1.00 | 16.36 | O   |
| ATOM | 1072 | N   | LEU | A | 139 | 15.348 | -0.004 | 4.229  | 1.00 | 26.31 | N   |
| ATOM | 1073 | CA  | LEU | A | 139 | 16.544 | -0.492 | 4.932  | 1.00 | 28.30 | C   |
| ATOM | 1074 | C   | LEU | A | 139 | 16.903 | 0.423  | 6.137  | 1.00 | 30.40 | C   |
| ATOM | 1075 | O   | LEU | A | 139 | 18.050 | 0.459  | 6.603  | 1.00 | 33.77 | O   |
| ATOM | 1076 | CB  | LEU | A | 139 | 17.764 | -0.643 | 3.987  | 1.00 | 23.98 | C   |
| ATOM | 1077 | CG  | LEU | A | 139 | 18.987 | -1.356 | 4.621  | 1.00 | 21.06 | C   |
| ATOM | 1078 | CD1 | LEU | A | 139 | 19.161 | -2.769 | 4.075  | 1.00 | 15.84 | C   |
| ATOM | 1079 | CD2 | LEU | A | 139 | 20.249 | -0.513 | 4.429  | 1.00 | 18.03 | C   |
| ATOM | 1080 | N   | TYR | A | 140 | 15.914 | 1.125  | 6.676  | 1.00 | 28.28 | N   |
| ATOM | 1081 | CA  | TYR | A | 140 | 16.160 | 2.032  | 7.782  | 1.00 | 27.48 | C   |
| ATOM | 1082 | C   | TYR | A | 140 | 14.903 | 2.160  | 8.640  | 1.00 | 26.31 | C   |
| ATOM | 1083 | O   | TYR | A | 140 | 14.644 | 1.316  | 9.484  | 1.00 | 25.70 | O   |
| ATOM | 1084 | CB  | TYR | A | 140 | 16.555 | 3.370  | 7.196  | 1.00 | 29.37 | C   |
| ATOM | 1085 | CG  | TYR | A | 140 | 18.029 | 3.568  | 7.070  | 1.00 | 32.07 | C   |
| ATOM | 1086 | CD1 | TYR | A | 140 | 18.907 | 2.754  | 7.774  | 1.00 | 32.26 | C   |
| ATOM | 1087 | CD2 | TYR | A | 140 | 18.511 | 4.785  | 6.615  | 1.00 | 35.07 | C   |
| ATOM | 1088 | CE1 | TYR | A | 140 | 20.189 | 3.177  | 8.085  | 1.00 | 31.31 | C   |
| ATOM | 1089 | CE2 | TYR | A | 140 | 19.788 | 5.220  | 6.938  | 1.00 | 34.45 | C   |
| ATOM | 1090 | CZ  | TYR | A | 140 | 20.604 | 4.429  | 7.691  | 1.00 | 30.17 | C   |
| ATOM | 1091 | OH  | TYR | A | 140 | 21.706 | 5.009  | 8.252  | 1.00 | 30.52 | O   |
| ATOM | 1092 | N   | GLU | A | 141 | 13.993 | 3.007  | 8.184  | 1.00 | 27.43 | N   |
| ATOM | 1093 | CA  | GLU | A | 141 | 12.635 | 3.080  | 8.702  | 1.00 | 26.66 | C   |
| ATOM | 1094 | C   | GLU | A | 141 | 11.830 | 1.793  | 8.474  | 1.00 | 25.94 | C   |
| ATOM | 1095 | O   | GLU | A | 141 | 10.589 | 1.841  | 8.394  | 1.00 | 24.42 | O   |
| ATOM | 1096 | CB  | GLU | A | 141 | 11.920 | 4.269  | 8.058  | 1.00 | 27.66 | C   |
| ATOM | 1097 | CG  | GLU | A | 141 | 12.753 | 5.571  | 8.070  | 1.00 | 28.85 | C   |
| ATOM | 1098 | CD  | GLU | A | 141 | 12.126 | 6.665  | 8.930  | 1.00 | 30.04 | C   |
| ATOM | 1099 | OE1 | GLU | A | 141 | 12.059 | 6.463  | 10.169 | 1.00 | 28.05 | O   |
| ATOM | 1100 | OE2 | GLU | A | 141 | 11.684 | 7.706  | 8.368  | 1.00 | 27.92 | O1- |
| ATOM | 1101 | N   | ILE | A | 142 | 12.543 | 0.668  | 8.301  | 1.00 | 25.02 | N   |
| ATOM | 1102 | CA  | ILE | A | 142 | 11.959 | -0.670 | 8.411  | 1.00 | 23.92 | C   |
| ATOM | 1103 | C   | ILE | A | 142 | 12.891 | -1.879 | 8.483  | 1.00 | 22.66 | C   |
| ATOM | 1104 | O   | ILE | A | 142 | 12.422 | -3.019 | 8.460  | 1.00 | 21.14 | O   |
| ATOM | 1105 | CB  | ILE | A | 142 | 10.920 | -0.960 | 7.307  | 1.00 | 25.56 | C   |
| ATOM | 1106 | CG1 | ILE | A | 142 | 9.839  | -1.855 | 7.893  | 1.00 | 31.26 | C   |
| ATOM | 1107 | CG2 | ILE | A | 142 | 11.533 | -1.747 | 6.136  | 1.00 | 26.16 | C   |
| ATOM | 1108 | CD1 | ILE | A | 142 | 9.808  | -1.835 | 9.391  | 1.00 | 32.34 | C   |
| ATOM | 1109 | N   | ALA | A | 143 | 14.192 | -1.655 | 8.574  | 1.00 | 21.53 | N   |
| ATOM | 1110 | CA  | ALA | A | 143 | 15.080 | -2.739 | 8.995  | 1.00 | 21.28 | C   |
| ATOM | 1111 | C   | ALA | A | 143 | 15.259 | -2.555 | 10.491 | 1.00 | 21.40 | C   |
| ATOM | 1112 | O   | ALA | A | 143 | 15.077 | -3.478 | 11.295 | 1.00 | 20.55 | O   |
| ATOM | 1113 | CB  | ALA | A | 143 | 16.437 | -2.637 | 8.279  | 1.00 | 20.32 | C   |
| ATOM | 1114 | N   | ARG | A | 144 | 15.496 | -1.300 | 10.850 | 1.00 | 21.00 | N   |
| ATOM | 1115 | CA  | ARG | A | 144 | 15.726 | -0.906 | 12.216 | 1.00 | 21.33 | C   |
| ATOM | 1116 | C   | ARG | A | 144 | 14.498 | -1.163 | 13.053 | 1.00 | 21.04 | C   |
| ATOM | 1117 | O   | ARG | A | 144 | 13.397 | -0.738 | 12.694 | 1.00 | 20.32 | O   |
| ATOM | 1118 | CB  | ARG | A | 144 | 16.052 | 0.577  | 12.271 | 1.00 | 21.01 | C   |
| ATOM | 1119 | CG  | ARG | A | 144 | 17.510 | 0.863  | 12.247 | 1.00 | 17.71 | C   |
| ATOM | 1120 | CD  | ARG | A | 144 | 18.023 | 1.041  | 10.857 | 1.00 | 17.22 | C   |
| ATOM | 1121 | NE  | ARG | A | 144 | 18.645 | 2.342  | 10.630 | 1.00 | 18.81 | N   |
| ATOM | 1122 | CZ  | ARG | A | 144 | 19.496 | 2.950  | 11.447 | 1.00 | 17.78 | C   |
| ATOM | 1123 | NH1 | ARG | A | 144 | 19.398 | 2.791  | 12.749 | 1.00 | 22.32 | N1+ |
| ATOM | 1124 | NH2 | ARG | A | 144 | 20.194 | 3.978  | 11.001 | 1.00 | 19.08 | N   |
| ATOM | 1125 | N   | ARG | A | 145 | 14.686 | -1.933 | 14.117 | 1.00 | 22.67 | N   |
| ATOM | 1126 | CA  | ARG | A | 145 | 13.838 | -1.888 | 15.297 | 1.00 | 22.80 | C   |
| ATOM | 1127 | C   | ARG | A | 145 | 12.341 | -1.995 | 14.978 | 1.00 | 23.74 | C   |
| ATOM | 1128 | O   | ARG | A | 145 | 11.492 | -1.697 | 15.827 | 1.00 | 24.29 | O   |
| ATOM | 1129 | CB  | ARG | A | 145 | 14.150 | -0.595 | 16.060 | 1.00 | 23.74 | C   |
| ATOM | 1130 | CG  | ARG | A | 145 | 13.284 | 0.605  | 15.663 | 1.00 | 24.56 | C   |
| ATOM | 1131 | CD  | ARG | A | 145 | 14.041 | 1.882  | 15.206 | 1.00 | 23.54 | C   |
| ATOM | 1132 | NE  | ARG | A | 145 | 13.036 | 2.868  | 14.811 | 1.00 | 23.80 | N   |
| ATOM | 1133 | CZ  | ARG | A | 145 | 13.214 | 3.859  | 13.954 | 1.00 | 24.48 | C   |

|      |      |     |     |   |     |        |         |        |      |       |     |
|------|------|-----|-----|---|-----|--------|---------|--------|------|-------|-----|
| ATOM | 1134 | NH1 | ARG | A | 145 | 14.272 | 4.656   | 14.069 | 1.00 | 24.11 | N1+ |
| ATOM | 1135 | NH2 | ARG | A | 145 | 12.154 | 4.288   | 13.278 | 1.00 | 24.06 | N   |
| ATOM | 1136 | N   | HIS | A | 146 | 12.021 | -2.380  | 13.739 | 1.00 | 23.24 | N   |
| ATOM | 1137 | CA  | HIS | A | 146 | 10.633 | -2.505  | 13.276 | 1.00 | 21.90 | C   |
| ATOM | 1138 | C   | HIS | A | 146 | 10.413 | -3.719  | 12.380 | 1.00 | 19.01 | C   |
| ATOM | 1139 | O   | HIS | A | 146 | 9.649  | -3.649  | 11.433 | 1.00 | 15.22 | O   |
| ATOM | 1140 | CB  | HIS | A | 146 | 10.196 | -1.244  | 12.519 | 1.00 | 21.14 | C   |
| ATOM | 1141 | CG  | HIS | A | 146 | 10.226 | -0.013  | 13.357 | 1.00 | 23.07 | C   |
| ATOM | 1142 | CD2 | HIS | A | 146 | 10.883 | 1.158   | 13.170 | 1.00 | 24.02 | C   |
| ATOM | 1143 | ND1 | HIS | A | 146 | 9.778  | 0.000   | 14.658 | 1.00 | 21.23 | N   |
| ATOM | 1144 | CE1 | HIS | A | 146 | 10.178 | 1.100   | 15.251 | 1.00 | 24.29 | C   |
| ATOM | 1145 | NE2 | HIS | A | 146 | 10.844 | 1.831   | 14.373 | 1.00 | 24.47 | N   |
| ATOM | 1146 | N   | PRO | A | 147 | 10.896 | -4.885  | 12.783 | 1.00 | 18.32 | N   |
| ATOM | 1147 | CA  | PRO | A | 147 | 10.624 | -5.945  | 11.843 | 1.00 | 19.37 | C   |
| ATOM | 1148 | C   | PRO | A | 147 | 9.128  | -6.280  | 11.753 | 1.00 | 24.48 | C   |
| ATOM | 1149 | O   | PRO | A | 147 | 8.718  | -6.993  | 10.833 | 1.00 | 27.95 | O   |
| ATOM | 1150 | CB  | PRO | A | 147 | 11.461 | -7.097  | 12.365 | 1.00 | 17.35 | C   |
| ATOM | 1151 | CG  | PRO | A | 147 | 12.544 | -6.430  | 13.108 | 1.00 | 17.68 | C   |
| ATOM | 1152 | CD  | PRO | A | 147 | 11.866 | -5.332  | 13.806 | 1.00 | 18.03 | C   |
| ATOM | 1153 | N   | TYR | A | 148 | 8.294  | -5.713  | 12.629 | 1.00 | 24.82 | N   |
| ATOM | 1154 | CA  | TYR | A | 148 | 6.868  | -6.045  | 12.564 | 1.00 | 25.01 | C   |
| ATOM | 1155 | C   | TYR | A | 148 | 6.009  | -4.990  | 11.846 | 1.00 | 26.88 | C   |
| ATOM | 1156 | O   | TYR | A | 148 | 5.048  | -5.353  | 11.167 | 1.00 | 29.08 | O   |
| ATOM | 1157 | CB  | TYR | A | 148 | 6.326  | -6.357  | 13.960 | 1.00 | 21.84 | C   |
| ATOM | 1158 | CG  | TYR | A | 148 | 6.986  | -7.573  | 14.586 | 1.00 | 20.84 | C   |
| ATOM | 1159 | CD1 | TYR | A | 148 | 8.272  | -7.502  | 15.093 | 1.00 | 21.27 | C   |
| ATOM | 1160 | CD2 | TYR | A | 148 | 6.368  | -8.812  | 14.576 | 1.00 | 21.92 | C   |
| ATOM | 1161 | CE1 | TYR | A | 148 | 8.926  | -8.629  | 15.558 | 1.00 | 18.20 | C   |
| ATOM | 1162 | CE2 | TYR | A | 148 | 7.019  | -9.947  | 15.036 | 1.00 | 19.43 | C   |
| ATOM | 1163 | CZ  | TYR | A | 148 | 8.298  | -9.843  | 15.521 | 1.00 | 17.54 | C   |
| ATOM | 1164 | OH  | TYR | A | 148 | 8.966  | -10.954 | 15.973 | 1.00 | 19.26 | O   |
| ATOM | 1165 | N   | PHE | A | 149 | 6.519  | -3.755  | 11.776 | 1.00 | 26.54 | N   |
| ATOM | 1166 | CA  | PHE | A | 149 | 5.862  | -2.630  | 11.080 | 1.00 | 23.95 | C   |
| ATOM | 1167 | C   | PHE | A | 149 | 4.992  | -3.027  | 9.893  | 1.00 | 23.50 | C   |
| ATOM | 1168 | O   | PHE | A | 149 | 5.444  | -3.643  | 8.915  | 1.00 | 20.73 | O   |
| ATOM | 1169 | CB  | PHE | A | 149 | 6.892  | -1.578  | 10.614 | 1.00 | 19.95 | C   |
| ATOM | 1170 | CG  | PHE | A | 149 | 6.368  | -0.157  | 10.584 | 1.00 | 18.95 | C   |
| ATOM | 1171 | CD1 | PHE | A | 149 | 5.244  | 0.189   | 9.840  | 1.00 | 21.19 | C   |
| ATOM | 1172 | CD2 | PHE | A | 149 | 7.044  | 0.853   | 11.240 | 1.00 | 17.97 | C   |
| ATOM | 1173 | CE1 | PHE | A | 149 | 4.814  | 1.514   | 9.748  | 1.00 | 17.03 | C   |
| ATOM | 1174 | CE2 | PHE | A | 149 | 6.613  | 2.177   | 11.152 | 1.00 | 17.64 | C   |
| ATOM | 1175 | CZ  | PHE | A | 149 | 5.501  | 2.501   | 10.402 | 1.00 | 13.77 | C   |
| ATOM | 1176 | N   | ALA | A | 151 | 3.646  | -2.885  | 6.915  | 1.00 | 16.85 | N   |
| ATOM | 1177 | CA  | ALA | A | 151 | 3.539  | -2.791  | 5.463  | 1.00 | 14.78 | C   |
| ATOM | 1178 | C   | ALA | A | 151 | 2.681  | -1.614  | 4.972  | 1.00 | 15.60 | C   |
| ATOM | 1179 | O   | ALA | A | 151 | 3.223  | -0.518  | 4.831  | 1.00 | 17.98 | O   |
| ATOM | 1180 | CB  | ALA | A | 151 | 3.038  | -4.104  | 4.884  | 1.00 | 13.97 | C   |
| ATOM | 1181 | N   | PRO | A | 152 | 1.346  | -1.776  | 4.762  | 1.00 | 13.15 | N   |
| ATOM | 1182 | CA  | PRO | A | 152 | 0.722  | -0.739  | 3.932  | 1.00 | 9.23  | C   |
| ATOM | 1183 | C   | PRO | A | 152 | 0.901  | 0.647   | 4.494  | 1.00 | 9.42  | C   |
| ATOM | 1184 | O   | PRO | A | 152 | 1.203  | 1.559   | 3.742  | 1.00 | 12.31 | O   |
| ATOM | 1185 | CB  | PRO | A | 152 | -0.746 | -1.137  | 3.863  | 1.00 | 3.96  | C   |
| ATOM | 1186 | CG  | PRO | A | 152 | -0.950 | -1.981  | 4.978  | 1.00 | 9.07  | C   |
| ATOM | 1187 | CD  | PRO | A | 152 | 0.329  | -2.722  | 5.244  | 1.00 | 12.15 | C   |
| ATOM | 1188 | N   | GLU | A | 153 | 1.031  | 0.730   | 5.816  | 1.00 | 11.50 | N   |
| ATOM | 1189 | CA  | GLU | A | 153 | 1.234  | 2.006   | 6.514  | 1.00 | 9.86  | C   |
| ATOM | 1190 | C   | GLU | A | 153 | 2.605  | 2.638   | 6.305  | 1.00 | 10.68 | C   |
| ATOM | 1191 | O   | GLU | A | 153 | 2.752  | 3.857   | 6.337  | 1.00 | 9.78  | O   |
| ATOM | 1192 | CB  | GLU | A | 153 | 0.971  | 1.828   | 7.995  | 1.00 | 5.51  | C   |
| ATOM | 1193 | CG  | GLU | A | 153 | -0.476 | 2.003   | 8.348  | 1.00 | 7.11  | C   |
| ATOM | 1194 | CD  | GLU | A | 153 | -0.969 | 3.409   | 8.114  | 1.00 | 7.65  | C   |
| ATOM | 1195 | OE1 | GLU | A | 153 | -0.136 | 4.313   | 8.022  | 1.00 | 5.80  | O   |
| ATOM | 1196 | OE2 | GLU | A | 153 | -2.194 | 3.611   | 8.020  | 1.00 | 11.12 | O1- |
| ATOM | 1197 | N   | LEU | A | 154 | 3.597  | 1.806   | 6.027  | 1.00 | 13.56 | N   |
| ATOM | 1198 | CA  | LEU | A | 154 | 4.861  | 2.287   | 5.484  | 1.00 | 17.58 | C   |
| ATOM | 1199 | C   | LEU | A | 154 | 4.729  | 2.816   | 4.045  | 1.00 | 19.77 | C   |
| ATOM | 1200 | O   | LEU | A | 154 | 5.245  | 3.881   | 3.731  | 1.00 | 19.71 | O   |
| ATOM | 1201 | CB  | LEU | A | 154 | 5.914  | 1.189   | 5.541  | 1.00 | 14.47 | C   |
| ATOM | 1202 | CG  | LEU | A | 154 | 7.016  | 1.644   | 6.467  | 1.00 | 16.08 | C   |
| ATOM | 1203 | CD1 | LEU | A | 154 | 8.162  | 0.670   | 6.454  | 1.00 | 16.69 | C   |
| ATOM | 1204 | CD2 | LEU | A | 154 | 7.461  | 3.019   | 6.022  | 1.00 | 19.40 | C   |

|      |      |     |     |   |     |        |        |        |      |       |     |
|------|------|-----|-----|---|-----|--------|--------|--------|------|-------|-----|
| ATOM | 1205 | N   | LEU | A | 155 | 3.982  | 2.112  | 3.201  | 1.00 | 20.63 | N   |
| ATOM | 1206 | CA  | LEU | A | 155 | 3.669  | 2.622  | 1.872  | 1.00 | 22.58 | C   |
| ATOM | 1207 | C   | LEU | A | 155 | 2.916  | 3.949  | 2.012  | 1.00 | 25.56 | C   |
| ATOM | 1208 | O   | LEU | A | 155 | 3.099  | 4.850  | 1.190  | 1.00 | 27.00 | O   |
| ATOM | 1209 | CB  | LEU | A | 155 | 2.801  | 1.636  | 1.075  | 1.00 | 19.65 | C   |
| ATOM | 1210 | CG  | LEU | A | 155 | 3.080  | 0.133  | 1.019  | 1.00 | 17.19 | C   |
| ATOM | 1211 | CD1 | LEU | A | 155 | 3.069  | -0.273 | -0.422 | 1.00 | 18.14 | C   |
| ATOM | 1212 | CD2 | LEU | A | 155 | 4.396  | -0.259 | 1.647  | 1.00 | 17.17 | C   |
| ATOM | 1213 | N   | PHE | A | 156 | 2.120  | 4.101  | 3.079  | 1.00 | 26.64 | N   |
| ATOM | 1214 | CA  | PHE | A | 156 | 1.490  | 5.403  | 3.375  | 1.00 | 26.26 | C   |
| ATOM | 1215 | C   | PHE | A | 156 | 2.460  | 6.391  | 4.033  | 1.00 | 24.10 | C   |
| ATOM | 1216 | O   | PHE | A | 156 | 2.373  | 7.601  | 3.814  | 1.00 | 23.49 | O   |
| ATOM | 1217 | CB  | PHE | A | 156 | 0.240  | 5.268  | 4.260  | 1.00 | 23.92 | C   |
| ATOM | 1218 | CG  | PHE | A | 156 | -0.286 | 6.590  | 4.749  | 1.00 | 21.57 | C   |
| ATOM | 1219 | CD1 | PHE | A | 156 | -0.843 | 7.500  | 3.865  | 1.00 | 20.83 | C   |
| ATOM | 1220 | CD2 | PHE | A | 156 | -0.113 | 6.977  | 6.066  | 1.00 | 20.34 | C   |
| ATOM | 1221 | CE1 | PHE | A | 156 | -1.209 | 8.766  | 4.286  | 1.00 | 16.36 | C   |
| ATOM | 1222 | CE2 | PHE | A | 156 | -0.481 | 8.251  | 6.492  | 1.00 | 17.60 | C   |
| ATOM | 1223 | CZ  | PHE | A | 156 | -1.029 | 9.140  | 5.594  | 1.00 | 16.53 | C   |
| ATOM | 1224 | N   | PHE | A | 157 | 3.415  | 5.874  | 4.791  | 1.00 | 21.35 | N   |
| ATOM | 1225 | CA  | PHE | A | 157 | 4.441  | 6.724  | 5.339  | 1.00 | 21.42 | C   |
| ATOM | 1226 | C   | PHE | A | 157 | 5.657  | 6.859  | 4.427  | 1.00 | 22.33 | C   |
| ATOM | 1227 | O   | PHE | A | 157 | 6.712  | 7.303  | 4.879  | 1.00 | 23.73 | O   |
| ATOM | 1228 | CB  | PHE | A | 157 | 4.863  | 6.195  | 6.700  | 1.00 | 21.49 | C   |
| ATOM | 1229 | CG  | PHE | A | 157 | 4.238  | 6.920  | 7.846  | 1.00 | 17.83 | C   |
| ATOM | 1230 | CD1 | PHE | A | 157 | 3.628  | 8.139  | 7.652  | 1.00 | 17.24 | C   |
| ATOM | 1231 | CD2 | PHE | A | 157 | 4.376  | 6.444  | 9.120  | 1.00 | 19.41 | C   |
| ATOM | 1232 | CE1 | PHE | A | 157 | 3.197  | 8.872  | 8.688  | 1.00 | 14.49 | C   |
| ATOM | 1233 | CE2 | PHE | A | 157 | 3.948  | 7.170  | 10.159 | 1.00 | 18.81 | C   |
| ATOM | 1234 | CZ  | PHE | A | 157 | 3.362  | 8.398  | 9.940  | 1.00 | 20.97 | C   |
| ATOM | 1235 | N   | ALA | A | 158 | 5.524  | 6.405  | 3.175  | 1.00 | 23.41 | N   |
| ATOM | 1236 | CA  | ALA | A | 158 | 6.590  | 6.492  | 2.160  | 1.00 | 21.51 | C   |
| ATOM | 1237 | C   | ALA | A | 158 | 6.383  | 7.773  | 1.393  | 1.00 | 22.27 | C   |
| ATOM | 1238 | O   | ALA | A | 158 | 7.251  | 8.647  | 1.377  | 1.00 | 22.61 | O   |
| ATOM | 1239 | CB  | ALA | A | 158 | 6.526  | 5.321  | 1.199  | 1.00 | 16.28 | C   |
| ATOM | 1240 | N   | LYS | A | 159 | 5.185  | 7.930  | 0.840  | 1.00 | 22.44 | N   |
| ATOM | 1241 | CA  | LYS | A | 159 | 4.829  | 9.184  | 0.200  | 1.00 | 21.86 | C   |
| ATOM | 1242 | C   | LYS | A | 159 | 5.146  | 10.345 | 1.144  | 1.00 | 23.62 | C   |
| ATOM | 1243 | O   | LYS | A | 159 | 5.899  | 11.218 | 0.761  | 1.00 | 25.81 | O   |
| ATOM | 1244 | CB  | LYS | A | 159 | 3.358  | 9.187  | -0.202 | 1.00 | 19.48 | C   |
| ATOM | 1245 | CG  | LYS | A | 159 | 3.096  | 8.664  | -1.584 | 1.00 | 18.68 | C   |
| ATOM | 1246 | CD  | LYS | A | 159 | 4.087  | 7.579  | -1.993 | 1.00 | 19.63 | C   |
| ATOM | 1247 | CE  | LYS | A | 159 | 3.781  | 7.040  | -3.387 | 1.00 | 20.86 | C   |
| ATOM | 1248 | NZ  | LYS | A | 159 | 4.795  | 6.042  | -3.824 | 1.00 | 23.26 | N1+ |
| ATOM | 1249 | N   | ARG | A | 160 | 4.850  | 10.195 | 2.436  | 1.00 | 23.94 | N   |
| ATOM | 1250 | CA  | ARG | A | 160 | 5.123  | 11.255 | 3.413  | 1.00 | 25.27 | C   |
| ATOM | 1251 | C   | ARG | A | 160 | 6.546  | 11.157 | 3.957  | 1.00 | 26.63 | C   |
| ATOM | 1252 | O   | ARG | A | 160 | 6.750  | 11.043 | 5.183  | 1.00 | 23.87 | O   |
| ATOM | 1253 | CB  | ARG | A | 160 | 4.135  | 11.184 | 4.583  | 1.00 | 28.93 | C   |
| ATOM | 1254 | CG  | ARG | A | 160 | 2.655  | 11.179 | 4.194  | 1.00 | 27.51 | C   |
| ATOM | 1255 | CD  | ARG | A | 160 | 2.030  | 12.549 | 4.347  | 1.00 | 25.69 | C   |
| ATOM | 1256 | NE  | ARG | A | 160 | 0.589  | 12.455 | 4.562  | 1.00 | 24.09 | N   |
| ATOM | 1257 | CZ  | ARG | A | 160 | 0.025  | 12.102 | 5.714  | 1.00 | 22.36 | C   |
| ATOM | 1258 | NH1 | ARG | A | 160 | 0.772  | 11.875 | 6.797  | 1.00 | 20.48 | N1+ |
| ATOM | 1259 | NH2 | ARG | A | 160 | -1.292 | 11.998 | 5.786  | 1.00 | 19.93 | N   |
| ATOM | 1260 | N   | TYR | A | 161 | 7.468  | 10.909 | 3.020  | 1.00 | 26.96 | N   |
| ATOM | 1261 | CA  | TYR | A | 161 | 8.917  | 11.151 | 3.154  | 1.00 | 25.36 | C   |
| ATOM | 1262 | C   | TYR | A | 161 | 9.285  | 11.672 | 1.781  | 1.00 | 25.00 | C   |
| ATOM | 1263 | O   | TYR | A | 161 | 9.938  | 12.717 | 1.649  | 1.00 | 26.93 | O   |
| ATOM | 1264 | CB  | TYR | A | 161 | 9.666  | 9.839  | 3.404  | 1.00 | 22.15 | C   |
| ATOM | 1265 | CG  | TYR | A | 161 | 11.146 | 9.948  | 3.736  | 1.00 | 19.16 | C   |
| ATOM | 1266 | CD1 | TYR | A | 161 | 11.649 | 10.985 | 4.526  | 1.00 | 21.34 | C   |
| ATOM | 1267 | CD2 | TYR | A | 161 | 12.035 | 8.967  | 3.311  | 1.00 | 17.23 | C   |
| ATOM | 1268 | CE1 | TYR | A | 161 | 13.021 | 11.033 | 4.875  | 1.00 | 18.50 | C   |
| ATOM | 1269 | CE2 | TYR | A | 161 | 13.376 | 9.007  | 3.641  | 1.00 | 15.97 | C   |
| ATOM | 1270 | CZ  | TYR | A | 161 | 13.870 | 10.035 | 4.411  | 1.00 | 16.75 | C   |
| ATOM | 1271 | OH  | TYR | A | 161 | 15.220 | 10.080 | 4.642  | 1.00 | 14.91 | O   |
| ATOM | 1272 | N   | LYS | A | 162 | 8.684  | 11.030 | 0.776  | 1.00 | 24.44 | N   |
| ATOM | 1273 | CA  | LYS | A | 162 | 8.762  | 11.445 | -0.629 | 1.00 | 20.54 | C   |
| ATOM | 1274 | C   | LYS | A | 162 | 8.217  | 12.847 | -0.779 | 1.00 | 18.06 | C   |
| ATOM | 1275 | O   | LYS | A | 162 | 8.972  | 13.809 | -0.711 | 1.00 | 18.82 | O   |

|      |      |     |     |   |     |        |        |        |      |       |     |
|------|------|-----|-----|---|-----|--------|--------|--------|------|-------|-----|
| ATOM | 1276 | CB  | LYS | A | 162 | 7.963  | 10.477 | -1.508 | 1.00 | 19.05 | C   |
| ATOM | 1277 | CG  | LYS | A | 162 | 8.158  | 10.649 | -3.005 | 1.00 | 18.72 | C   |
| ATOM | 1278 | CD  | LYS | A | 162 | 7.086  | 11.530 | -3.600 | 1.00 | 15.41 | C   |
| ATOM | 1279 | CE  | LYS | A | 162 | 6.906  | 11.243 | -5.053 | 1.00 | 13.03 | C   |
| ATOM | 1280 | NZ  | LYS | A | 162 | 6.676  | 9.809  | -5.269 | 1.00 | 14.01 | N1+ |
| ATOM | 1281 | N   | ALA | A | 163 | 6.893  | 12.947 | -0.846 | 1.00 | 17.36 | N   |
| ATOM | 1282 | CA  | ALA | A | 163 | 6.153  | 14.205 | -0.954 | 1.00 | 17.24 | C   |
| ATOM | 1283 | C   | ALA | A | 163 | 6.795  | 15.380 | -0.258 | 1.00 | 17.12 | C   |
| ATOM | 1284 | O   | ALA | A | 163 | 6.690  | 16.493 | -0.748 | 1.00 | 19.51 | O   |
| ATOM | 1285 | CB  | ALA | A | 163 | 4.736  | 14.030 | -0.439 | 1.00 | 14.73 | C   |
| ATOM | 1286 | N   | ALA | A | 164 | 7.419  | 15.144 | 0.894  | 1.00 | 16.39 | N   |
| ATOM | 1287 | CA  | ALA | A | 164 | 8.122  | 16.201 | 1.603  | 1.00 | 17.36 | C   |
| ATOM | 1288 | C   | ALA | A | 164 | 9.253  | 16.693 | 0.709  | 1.00 | 19.77 | C   |
| ATOM | 1289 | O   | ALA | A | 164 | 9.142  | 17.759 | 0.114  | 1.00 | 20.30 | O   |
| ATOM | 1290 | CB  | ALA | A | 164 | 8.670  | 15.686 | 2.930  | 1.00 | 15.34 | C   |
| ATOM | 1291 | N   | PHE | A | 165 | 10.238 | 15.827 | 0.466  | 1.00 | 21.94 | N   |
| ATOM | 1292 | CA  | PHE | A | 165 | 11.379 | 16.135 | -0.393 | 1.00 | 20.00 | C   |
| ATOM | 1293 | C   | PHE | A | 165 | 10.864 | 16.794 | -1.664 | 1.00 | 19.97 | C   |
| ATOM | 1294 | O   | PHE | A | 165 | 11.217 | 17.951 | -1.933 | 1.00 | 19.72 | O   |
| ATOM | 1295 | CB  | PHE | A | 165 | 12.108 | 14.842 | -0.765 | 1.00 | 24.10 | C   |
| ATOM | 1296 | CG  | PHE | A | 165 | 13.261 | 14.491 | 0.139  | 1.00 | 26.13 | C   |
| ATOM | 1297 | CD1 | PHE | A | 165 | 13.084 | 14.331 | 1.495  | 1.00 | 26.42 | C   |
| ATOM | 1298 | CD2 | PHE | A | 165 | 14.505 | 14.200 | -0.396 | 1.00 | 27.17 | C   |
| ATOM | 1299 | CE1 | PHE | A | 165 | 14.128 | 13.891 | 2.287  | 1.00 | 24.89 | C   |
| ATOM | 1300 | CE2 | PHE | A | 165 | 15.536 | 13.758 | 0.397  | 1.00 | 22.89 | C   |
| ATOM | 1301 | CZ  | PHE | A | 165 | 15.350 | 13.609 | 1.730  | 1.00 | 22.00 | C   |
| ATOM | 1302 | N   | THR | A | 166 | 9.807  | 16.176 | -2.209 | 1.00 | 18.51 | N   |
| ATOM | 1303 | CA  | THR | A | 166 | 9.151  | 16.502 | -3.488 | 1.00 | 17.70 | C   |
| ATOM | 1304 | C   | THR | A | 166 | 8.432  | 17.857 | -3.457 | 1.00 | 20.02 | C   |
| ATOM | 1305 | O   | THR | A | 166 | 7.358  | 18.038 | -4.048 | 1.00 | 21.09 | O   |
| ATOM | 1306 | CB  | THR | A | 166 | 8.105  | 15.409 | -3.838 | 1.00 | 18.48 | C   |
| ATOM | 1307 | CG2 | THR | A | 166 | 7.511  | 15.601 | -5.242 | 1.00 | 15.89 | C   |
| ATOM | 1308 | OG1 | THR | A | 166 | 8.715  | 14.114 | -3.735 | 1.00 | 18.39 | O   |
| ATOM | 1309 | N   | GLU | A | 167 | 8.978  | 18.778 | -2.677 | 1.00 | 20.35 | N   |
| ATOM | 1310 | CA  | GLU | A | 167 | 8.511  | 20.145 | -2.670 | 1.00 | 20.28 | C   |
| ATOM | 1311 | C   | GLU | A | 167 | 9.603  | 21.010 | -2.066 | 1.00 | 18.79 | C   |
| ATOM | 1312 | O   | GLU | A | 167 | 10.110 | 21.924 | -2.699 | 1.00 | 19.11 | O   |
| ATOM | 1313 | CB  | GLU | A | 167 | 7.243  | 20.228 | -1.846 | 1.00 | 20.88 | C   |
| ATOM | 1314 | CG  | GLU | A | 167 | 6.759  | 21.612 | -1.587 | 1.00 | 26.70 | C   |
| ATOM | 1315 | CD  | GLU | A | 167 | 5.856  | 21.656 | -0.377 | 1.00 | 29.94 | C   |
| ATOM | 1316 | OE1 | GLU | A | 167 | 4.740  | 21.074 | -0.432 | 1.00 | 32.74 | O   |
| ATOM | 1317 | OE2 | GLU | A | 167 | 6.300  | 22.200 | 0.658  | 1.00 | 32.31 | O1- |
| ATOM | 1318 | N   | CYS | A | 168 | 10.066 | 20.636 | -0.895 | 1.00 | 19.65 | N   |
| ATOM | 1319 | CA  | CYS | A | 168 | 10.978 | 21.490 | -0.205 | 1.00 | 22.23 | C   |
| ATOM | 1320 | C   | CYS | A | 168 | 12.291 | 20.781 | -0.033 | 1.00 | 25.31 | C   |
| ATOM | 1321 | O   | CYS | A | 168 | 12.626 | 20.370 | 1.077  | 1.00 | 29.59 | O   |
| ATOM | 1322 | CB  | CYS | A | 168 | 10.395 | 21.919 | 1.147  | 1.00 | 22.76 | C   |
| ATOM | 1323 | SG  | CYS | A | 168 | 11.603 | 22.432 | 2.429  | 1.00 | 26.02 | S   |
| ATOM | 1324 | N   | CYS | A | 169 | 13.009 | 20.566 | -1.136 | 1.00 | 24.80 | N   |
| ATOM | 1325 | CA  | CYS | A | 169 | 14.459 | 20.798 | -1.101 | 1.00 | 27.27 | C   |
| ATOM | 1326 | C   | CYS | A | 169 | 14.569 | 22.293 | -1.412 | 1.00 | 26.49 | C   |
| ATOM | 1327 | O   | CYS | A | 169 | 15.379 | 23.015 | -0.802 | 1.00 | 26.20 | O   |
| ATOM | 1328 | CB  | CYS | A | 169 | 15.190 | 19.988 | -2.194 | 1.00 | 30.98 | C   |
| ATOM | 1329 | SG  | CYS | A | 169 | 15.841 | 18.333 | -1.718 | 1.00 | 33.25 | S   |
| ATOM | 1330 | N   | GLN | A | 170 | 13.492 | 22.748 | -2.059 | 1.00 | 26.22 | N   |
| ATOM | 1331 | CA  | GLN | A | 170 | 13.353 | 23.983 | -2.844 | 1.00 | 25.86 | C   |
| ATOM | 1332 | C   | GLN | A | 170 | 13.998 | 25.203 | -2.207 | 1.00 | 26.18 | C   |
| ATOM | 1333 | O   | GLN | A | 170 | 15.202 | 25.251 | -2.033 | 1.00 | 30.02 | O   |
| ATOM | 1334 | CB  | GLN | A | 170 | 11.842 | 24.269 | -3.085 | 1.00 | 25.67 | C   |
| ATOM | 1335 | CG  | GLN | A | 170 | 11.397 | 24.518 | -4.531 | 1.00 | 21.68 | C   |
| ATOM | 1336 | CD  | GLN | A | 170 | 11.373 | 23.257 | -5.393 | 1.00 | 20.70 | C   |
| ATOM | 1337 | NE2 | GLN | A | 170 | 12.540 | 22.814 | -5.816 | 1.00 | 20.61 | N   |
| ATOM | 1338 | OE1 | GLN | A | 170 | 10.321 | 22.737 | -5.727 | 1.00 | 16.98 | O   |
| ATOM | 1339 | N   | ALA | A | 171 | 13.192 | 26.161 | -1.785 | 1.00 | 25.17 | N   |
| ATOM | 1340 | CA  | ALA | A | 171 | 13.718 | 27.493 | -1.587 | 1.00 | 22.37 | C   |
| ATOM | 1341 | C   | ALA | A | 171 | 14.440 | 27.547 | -0.279 | 1.00 | 23.13 | C   |
| ATOM | 1342 | O   | ALA | A | 171 | 15.176 | 28.489 | -0.017 | 1.00 | 25.63 | O   |
| ATOM | 1343 | CB  | ALA | A | 171 | 12.619 | 28.501 | -1.608 | 1.00 | 24.39 | C   |
| ATOM | 1344 | N   | ALA | A | 172 | 14.170 | 26.578 | 0.583  | 1.00 | 22.80 | N   |
| ATOM | 1345 | CA  | ALA | A | 172 | 14.686 | 26.649 | 1.935  | 1.00 | 23.27 | C   |
| ATOM | 1346 | C   | ALA | A | 172 | 15.967 | 25.845 | 2.129  | 1.00 | 23.80 | C   |

|      |      |     |     |   |     |        |        |        |      |       |     |
|------|------|-----|-----|---|-----|--------|--------|--------|------|-------|-----|
| ATOM | 1347 | O   | ALA | A | 172 | 16.315 | 25.519 | 3.270  | 1.00 | 21.53 | O   |
| ATOM | 1348 | CB  | ALA | A | 172 | 13.634 | 26.207 | 2.915  | 1.00 | 21.51 | C   |
| ATOM | 1349 | N   | ASP | A | 173 | 16.684 | 25.569 | 1.031  | 1.00 | 25.42 | N   |
| ATOM | 1350 | CA  | ASP | A | 173 | 17.901 | 24.751 | 1.088  | 1.00 | 28.45 | C   |
| ATOM | 1351 | C   | ASP | A | 173 | 17.612 | 23.425 | 1.779  | 1.00 | 30.18 | C   |
| ATOM | 1352 | O   | ASP | A | 173 | 18.403 | 22.987 | 2.608  | 1.00 | 31.67 | O   |
| ATOM | 1353 | CB  | ASP | A | 173 | 18.973 | 25.462 | 1.906  | 1.00 | 29.65 | C   |
| ATOM | 1354 | CG  | ASP | A | 173 | 19.953 | 26.208 | 1.057  | 1.00 | 30.99 | C   |
| ATOM | 1355 | OD1 | ASP | A | 173 | 19.492 | 27.029 | 0.227  | 1.00 | 32.55 | O   |
| ATOM | 1356 | OD2 | ASP | A | 173 | 21.176 | 25.999 | 1.265  | 1.00 | 32.46 | O1- |
| ATOM | 1357 | N   | LYS | A | 174 | 16.377 | 22.957 | 1.652  | 1.00 | 30.45 | N   |
| ATOM | 1358 | CA  | LYS | A | 174 | 15.795 | 21.965 | 2.549  | 1.00 | 29.08 | C   |
| ATOM | 1359 | C   | LYS | A | 174 | 15.766 | 22.368 | 4.036  | 1.00 | 28.75 | C   |
| ATOM | 1360 | O   | LYS | A | 174 | 15.050 | 21.761 | 4.840  | 1.00 | 29.82 | O   |
| ATOM | 1361 | CB  | LYS | A | 174 | 16.501 | 20.618 | 2.369  | 1.00 | 29.28 | C   |
| ATOM | 1362 | CG  | LYS | A | 174 | 17.744 | 20.415 | 3.213  | 1.00 | 28.90 | C   |
| ATOM | 1363 | CD  | LYS | A | 174 | 17.508 | 19.425 | 4.326  | 1.00 | 28.34 | C   |
| ATOM | 1364 | CE  | LYS | A | 174 | 18.696 | 19.385 | 5.263  | 1.00 | 28.62 | C   |
| ATOM | 1365 | NZ  | LYS | A | 174 | 19.405 | 18.085 | 5.065  | 1.00 | 31.78 | N1+ |
| ATOM | 1366 | N   | ALA | A | 175 | 16.507 | 23.402 | 4.401  | 1.00 | 26.56 | N   |
| ATOM | 1367 | CA  | ALA | A | 175 | 16.781 | 23.678 | 5.795  | 1.00 | 27.02 | C   |
| ATOM | 1368 | C   | ALA | A | 175 | 15.532 | 23.529 | 6.661  | 1.00 | 27.16 | C   |
| ATOM | 1369 | O   | ALA | A | 175 | 15.266 | 22.457 | 7.181  | 1.00 | 27.67 | O   |
| ATOM | 1370 | CB  | ALA | A | 175 | 17.359 | 25.092 | 5.929  | 1.00 | 29.25 | C   |
| ATOM | 1371 | N   | ALA | A | 176 | 14.672 | 24.542 | 6.602  | 1.00 | 26.48 | N   |
| ATOM | 1372 | CA  | ALA | A | 176 | 13.614 | 24.748 | 7.567  | 1.00 | 20.96 | C   |
| ATOM | 1373 | C   | ALA | A | 176 | 12.325 | 24.254 | 6.976  | 1.00 | 21.35 | C   |
| ATOM | 1374 | O   | ALA | A | 176 | 11.676 | 23.432 | 7.557  | 1.00 | 22.19 | O   |
| ATOM | 1375 | CB  | ALA | A | 176 | 13.506 | 26.217 | 7.899  | 1.00 | 20.23 | C   |
| ATOM | 1376 | N   | CYS | A | 177 | 11.973 | 24.711 | 5.784  | 1.00 | 22.81 | N   |
| ATOM | 1377 | CA  | CYS | A | 177 | 10.706 | 24.305 | 5.168  | 1.00 | 25.45 | C   |
| ATOM | 1378 | C   | CYS | A | 177 | 10.548 | 22.808 | 4.974  | 1.00 | 25.72 | C   |
| ATOM | 1379 | O   | CYS | A | 177 | 9.532  | 22.387 | 4.413  | 1.00 | 25.67 | O   |
| ATOM | 1380 | CB  | CYS | A | 177 | 10.498 | 24.980 | 3.800  | 1.00 | 28.47 | C   |
| ATOM | 1381 | SG  | CYS | A | 177 | 11.590 | 24.464 | 2.414  | 1.00 | 27.41 | S   |
| ATOM | 1382 | N   | LEU | A | 178 | 11.645 | 22.068 | 5.169  | 1.00 | 25.62 | N   |
| ATOM | 1383 | CA  | LEU | A | 178 | 11.655 | 20.608 | 5.049  | 1.00 | 25.90 | C   |
| ATOM | 1384 | C   | LEU | A | 178 | 11.677 | 19.970 | 6.433  | 1.00 | 27.85 | C   |
| ATOM | 1385 | O   | LEU | A | 178 | 10.620 | 19.599 | 6.972  | 1.00 | 31.37 | O   |
| ATOM | 1386 | CB  | LEU | A | 178 | 12.880 | 20.117 | 4.255  | 1.00 | 23.18 | C   |
| ATOM | 1387 | CG  | LEU | A | 178 | 12.918 | 18.765 | 3.515  | 1.00 | 22.71 | C   |
| ATOM | 1388 | CD1 | LEU | A | 178 | 14.366 | 18.315 | 3.373  | 1.00 | 15.42 | C   |
| ATOM | 1389 | CD2 | LEU | A | 178 | 12.073 | 17.684 | 4.217  | 1.00 | 19.52 | C   |
| ATOM | 1390 | N   | LEU | A | 179 | 12.858 | 19.897 | 7.046  | 1.00 | 24.44 | N   |
| ATOM | 1391 | CA  | LEU | A | 179 | 13.079 | 18.960 | 8.143  | 1.00 | 23.00 | C   |
| ATOM | 1392 | C   | LEU | A | 179 | 12.215 | 19.038 | 9.449  | 1.00 | 23.84 | C   |
| ATOM | 1393 | O   | LEU | A | 179 | 12.326 | 18.165 | 10.315 | 1.00 | 22.67 | O   |
| ATOM | 1394 | CB  | LEU | A | 179 | 14.588 | 18.940 | 8.460  | 1.00 | 21.35 | C   |
| ATOM | 1395 | CG  | LEU | A | 179 | 15.248 | 19.579 | 9.697  | 1.00 | 23.42 | C   |
| ATOM | 1396 | CD1 | LEU | A | 179 | 16.763 | 19.387 | 9.589  | 1.00 | 22.06 | C   |
| ATOM | 1397 | CD2 | LEU | A | 179 | 14.898 | 21.062 | 9.845  | 1.00 | 18.81 | C   |
| ATOM | 1398 | N   | PRO | A | 180 | 11.301 | 20.026 | 9.578  | 1.00 | 24.90 | N   |
| ATOM | 1399 | CA  | PRO | A | 180 | 10.275 | 19.957 | 10.637 | 1.00 | 25.32 | C   |
| ATOM | 1400 | C   | PRO | A | 180 | 9.020  | 19.164 | 10.271 | 1.00 | 25.47 | C   |
| ATOM | 1401 | O   | PRO | A | 180 | 8.078  | 19.034 | 11.074 | 1.00 | 24.17 | O   |
| ATOM | 1402 | CB  | PRO | A | 180 | 9.956  | 21.425 | 10.914 | 1.00 | 25.04 | C   |
| ATOM | 1403 | CG  | PRO | A | 180 | 10.217 | 22.072 | 9.597  | 1.00 | 22.93 | C   |
| ATOM | 1404 | CD  | PRO | A | 180 | 11.523 | 21.427 | 9.210  | 1.00 | 24.99 | C   |
| ATOM | 1405 | N   | LYS | A | 181 | 9.018  | 18.641 | 9.054  | 1.00 | 24.23 | N   |
| ATOM | 1406 | CA  | LYS | A | 181 | 8.168  | 17.507 | 8.701  | 1.00 | 23.92 | C   |
| ATOM | 1407 | C   | LYS | A | 181 | 9.027  | 16.222 | 8.798  | 1.00 | 22.82 | C   |
| ATOM | 1408 | O   | LYS | A | 181 | 8.584  | 15.135 | 8.454  | 1.00 | 20.58 | O   |
| ATOM | 1409 | CB  | LYS | A | 181 | 7.615  | 17.711 | 7.286  | 1.00 | 25.23 | C   |
| ATOM | 1410 | CG  | LYS | A | 181 | 7.840  | 19.139 | 6.771  | 1.00 | 23.39 | C   |
| ATOM | 1411 | CD  | LYS | A | 181 | 7.528  | 19.289 | 5.312  | 1.00 | 21.94 | C   |
| ATOM | 1412 | CE  | LYS | A | 181 | 6.048  | 19.541 | 5.120  | 1.00 | 22.34 | C   |
| ATOM | 1413 | NZ  | LYS | A | 181 | 5.471  | 20.266 | 6.296  | 1.00 | 24.22 | N1+ |
| ATOM | 1414 | N   | LEU | A | 182 | 10.231 | 16.372 | 9.354  | 1.00 | 21.40 | N   |
| ATOM | 1415 | CA  | LEU | A | 182 | 11.159 | 15.277 | 9.612  | 1.00 | 18.92 | C   |
| ATOM | 1416 | C   | LEU | A | 182 | 11.513 | 15.303 | 11.107 | 1.00 | 18.56 | C   |
| ATOM | 1417 | O   | LEU | A | 182 | 12.482 | 14.685 | 11.539 | 1.00 | 16.25 | O   |

|      |      |     |     |   |     |        |        |        |      |       |     |
|------|------|-----|-----|---|-----|--------|--------|--------|------|-------|-----|
| ATOM | 1418 | CB  | LEU | A | 182 | 12.431 | 15.475 | 8.777  | 1.00 | 19.22 | C   |
| ATOM | 1419 | CG  | LEU | A | 182 | 12.869 | 14.556 | 7.621  | 1.00 | 20.67 | C   |
| ATOM | 1420 | CD1 | LEU | A | 182 | 12.740 | 13.115 | 8.064  | 1.00 | 22.41 | C   |
| ATOM | 1421 | CD2 | LEU | A | 182 | 12.070 | 14.796 | 6.342  | 1.00 | 16.92 | C   |
| ATOM | 1422 | N   | ASP | A | 183 | 10.857 | 16.186 | 11.849 | 1.00 | 19.20 | N   |
| ATOM | 1423 | CA  | ASP | A | 183 | 10.839 | 16.085 | 13.305 | 1.00 | 21.07 | C   |
| ATOM | 1424 | C   | ASP | A | 183 | 9.608  | 15.238 | 13.640 | 1.00 | 21.27 | C   |
| ATOM | 1425 | O   | ASP | A | 183 | 9.693  | 14.015 | 13.759 | 1.00 | 20.65 | O   |
| ATOM | 1426 | CB  | ASP | A | 183 | 10.731 | 17.485 | 13.960 | 1.00 | 22.49 | C   |
| ATOM | 1427 | CG  | ASP | A | 183 | 12.064 | 18.279 | 13.924 | 1.00 | 24.78 | C   |
| ATOM | 1428 | OD1 | ASP | A | 183 | 12.922 | 18.040 | 14.805 | 1.00 | 22.96 | O   |
| ATOM | 1429 | OD2 | ASP | A | 183 | 12.261 | 19.129 | 13.018 | 1.00 | 24.01 | O1- |
| ATOM | 1430 | N   | GLU | A | 184 | 8.443  | 15.856 | 13.510 | 1.00 | 20.83 | N   |
| ATOM | 1431 | CA  | GLU | A | 184 | 7.190  | 15.210 | 13.853 | 1.00 | 20.58 | C   |
| ATOM | 1432 | C   | GLU | A | 184 | 7.081  | 13.767 | 13.329 | 1.00 | 19.58 | C   |
| ATOM | 1433 | O   | GLU | A | 184 | 7.119  | 12.822 | 14.118 | 1.00 | 18.60 | O   |
| ATOM | 1434 | CB  | GLU | A | 184 | 6.021  | 16.067 | 13.356 | 1.00 | 21.76 | C   |
| ATOM | 1435 | CG  | GLU | A | 184 | 4.698  | 15.723 | 13.997 | 1.00 | 25.58 | C   |
| ATOM | 1436 | CD  | GLU | A | 184 | 3.531  | 15.959 | 13.071 | 1.00 | 27.71 | C   |
| ATOM | 1437 | OE1 | GLU | A | 184 | 3.257  | 17.145 | 12.760 | 1.00 | 26.41 | O   |
| ATOM | 1438 | OE2 | GLU | A | 184 | 2.892  | 14.954 | 12.659 | 1.00 | 29.24 | O1- |
| ATOM | 1439 | N   | LEU | A | 185 | 7.114  | 13.580 | 12.015 | 1.00 | 19.28 | N   |
| ATOM | 1440 | CA  | LEU | A | 185 | 6.872  | 12.254 | 11.438 | 1.00 | 21.28 | C   |
| ATOM | 1441 | C   | LEU | A | 185 | 8.027  | 11.229 | 11.664 | 1.00 | 21.48 | C   |
| ATOM | 1442 | O   | LEU | A | 185 | 8.321  | 10.422 | 10.797 | 1.00 | 20.44 | O   |
| ATOM | 1443 | CB  | LEU | A | 185 | 6.549  | 12.387 | 9.930  | 1.00 | 21.87 | C   |
| ATOM | 1444 | CG  | LEU | A | 185 | 5.217  | 13.009 | 9.440  | 1.00 | 24.75 | C   |
| ATOM | 1445 | CD1 | LEU | A | 185 | 5.400  | 14.429 | 8.858  | 1.00 | 21.49 | C   |
| ATOM | 1446 | CD2 | LEU | A | 185 | 4.605  | 12.100 | 8.376  | 1.00 | 22.23 | C   |
| ATOM | 1447 | N   | ARG | A | 186 | 8.728  | 11.323 | 12.789 | 1.00 | 21.60 | N   |
| ATOM | 1448 | CA  | ARG | A | 186 | 9.692  | 10.304 | 13.191 | 1.00 | 20.65 | C   |
| ATOM | 1449 | C   | ARG | A | 186 | 9.175  | 9.608  | 14.448 | 1.00 | 23.63 | C   |
| ATOM | 1450 | O   | ARG | A | 186 | 9.353  | 8.393  | 14.626 | 1.00 | 24.05 | O   |
| ATOM | 1451 | CB  | ARG | A | 186 | 11.036 | 10.941 | 13.514 | 1.00 | 21.81 | C   |
| ATOM | 1452 | CG  | ARG | A | 186 | 11.149 | 11.524 | 14.926 | 1.00 | 20.40 | C   |
| ATOM | 1453 | CD  | ARG | A | 186 | 12.527 | 11.273 | 15.525 | 1.00 | 22.73 | C   |
| ATOM | 1454 | NE  | ARG | A | 186 | 12.739 | 9.855  | 15.758 | 1.00 | 24.25 | N   |
| ATOM | 1455 | CZ  | ARG | A | 186 | 13.468 | 9.358  | 16.750 | 1.00 | 26.77 | C   |
| ATOM | 1456 | NH1 | ARG | A | 186 | 14.043 | 10.164 | 17.638 | 1.00 | 26.94 | N1+ |
| ATOM | 1457 | NH2 | ARG | A | 186 | 13.561 | 8.042  | 16.896 | 1.00 | 28.22 | N   |
| ATOM | 1458 | N   | ASP | A | 187 | 8.589  | 10.399 | 15.349 | 1.00 | 23.17 | N   |
| ATOM | 1459 | CA  | ASP | A | 187 | 7.844  | 9.858  | 16.463 | 1.00 | 20.77 | C   |
| ATOM | 1460 | C   | ASP | A | 187 | 6.644  | 9.094  | 15.937 | 1.00 | 18.87 | C   |
| ATOM | 1461 | O   | ASP | A | 187 | 6.412  | 7.993  | 16.382 | 1.00 | 18.84 | O   |
| ATOM | 1462 | CB  | ASP | A | 187 | 7.385  | 10.972 | 17.388 | 1.00 | 23.77 | C   |
| ATOM | 1463 | CG  | ASP | A | 187 | 8.523  | 11.556 | 18.208 | 1.00 | 26.43 | C   |
| ATOM | 1464 | OD1 | ASP | A | 187 | 8.918  | 10.937 | 19.241 | 1.00 | 27.86 | O   |
| ATOM | 1465 | OD2 | ASP | A | 187 | 8.981  | 12.669 | 17.847 | 1.00 | 26.15 | O1- |
| ATOM | 1466 | N   | GLU | A | 188 | 6.000  | 9.594  | 14.880 | 1.00 | 18.08 | N   |
| ATOM | 1467 | CA  | GLU | A | 188 | 4.861  | 8.894  | 14.247 | 1.00 | 18.47 | C   |
| ATOM | 1468 | C   | GLU | A | 188 | 5.280  | 7.641  | 13.475 | 1.00 | 18.83 | C   |
| ATOM | 1469 | O   | GLU | A | 188 | 4.440  | 6.970  | 12.890 | 1.00 | 18.98 | O   |
| ATOM | 1470 | CB  | GLU | A | 188 | 4.074  | 9.840  | 13.299 | 1.00 | 16.29 | C   |
| ATOM | 1471 | CG  | GLU | A | 188 | 2.648  | 9.362  | 12.934 | 1.00 | 12.67 | C   |
| ATOM | 1472 | CD  | GLU | A | 188 | 1.770  | 10.425 | 12.231 | 1.00 | 16.08 | C   |
| ATOM | 1473 | OE1 | GLU | A | 188 | 2.195  | 11.591 | 12.086 | 1.00 | 16.21 | O   |
| ATOM | 1474 | OE2 | GLU | A | 188 | 0.607  | 10.109 | 11.882 | 1.00 | 14.17 | O1- |
| ATOM | 1475 | N   | GLY | A | 189 | 6.587  | 7.418  | 13.355 | 1.00 | 20.49 | N   |
| ATOM | 1476 | CA  | GLY | A | 189 | 7.098  | 6.195  | 12.753 | 1.00 | 19.35 | C   |
| ATOM | 1477 | C   | GLY | A | 189 | 7.221  | 5.173  | 13.857 | 1.00 | 18.26 | C   |
| ATOM | 1478 | O   | GLY | A | 189 | 6.532  | 4.161  | 13.867 | 1.00 | 18.56 | O   |
| ATOM | 1479 | N   | LYS | A | 190 | 7.964  | 5.536  | 14.886 | 1.00 | 20.08 | N   |
| ATOM | 1480 | CA  | LYS | A | 190 | 7.903  | 4.816  | 16.152 | 1.00 | 22.77 | C   |
| ATOM | 1481 | C   | LYS | A | 190 | 6.463  | 4.574  | 16.647 | 1.00 | 22.46 | C   |
| ATOM | 1482 | O   | LYS | A | 190 | 6.120  | 3.434  | 16.940 | 1.00 | 24.59 | O   |
| ATOM | 1483 | CB  | LYS | A | 190 | 8.710  | 5.555  | 17.232 | 1.00 | 24.21 | C   |
| ATOM | 1484 | CG  | LYS | A | 190 | 10.186 | 5.699  | 16.889 | 1.00 | 27.27 | C   |
| ATOM | 1485 | CD  | LYS | A | 190 | 11.034 | 5.974  | 18.115 | 1.00 | 31.27 | C   |
| ATOM | 1486 | CE  | LYS | A | 190 | 10.959 | 7.431  | 18.550 | 1.00 | 32.12 | C   |
| ATOM | 1487 | NZ  | LYS | A | 190 | 12.010 | 7.723  | 19.570 | 1.00 | 31.95 | N1+ |
| ATOM | 1488 | N   | ALA | A | 191 | 5.594  | 5.589  | 16.605 | 1.00 | 20.34 | N   |

|      |      |     |     |   |     |        |         |        |      |       |     |
|------|------|-----|-----|---|-----|--------|---------|--------|------|-------|-----|
| ATOM | 1489 | CA  | ALA | A | 191 | 4.280  | 5.495   | 17.239 | 1.00 | 17.99 | C   |
| ATOM | 1490 | C   | ALA | A | 191 | 3.575  | 4.269   | 16.726 | 1.00 | 17.52 | C   |
| ATOM | 1491 | O   | ALA | A | 191 | 3.591  | 3.250   | 17.391 | 1.00 | 21.21 | O   |
| ATOM | 1492 | CB  | ALA | A | 191 | 3.442  | 6.712   | 16.971 | 1.00 | 17.43 | C   |
| ATOM | 1493 | N   | SER | A | 192 | 3.200  | 4.269   | 15.458 | 1.00 | 16.48 | N   |
| ATOM | 1494 | CA  | SER | A | 192 | 2.445  | 3.151   | 14.932 | 1.00 | 15.33 | C   |
| ATOM | 1495 | C   | SER | A | 192 | 3.246  | 1.855   | 14.918 | 1.00 | 17.13 | C   |
| ATOM | 1496 | O   | SER | A | 192 | 2.673  | 0.771   | 15.078 | 1.00 | 18.89 | O   |
| ATOM | 1497 | CB  | SER | A | 192 | 1.943  | 3.446   | 13.538 | 1.00 | 14.90 | C   |
| ATOM | 1498 | OG  | SER | A | 192 | 1.128  | 2.380   | 13.116 | 1.00 | 19.59 | O   |
| ATOM | 1499 | N   | SER | A | 193 | 4.567  | 1.946   | 14.777 | 1.00 | 13.75 | N   |
| ATOM | 1500 | CA  | SER | A | 193 | 5.377  | 0.738   | 14.665 | 1.00 | 11.93 | C   |
| ATOM | 1501 | C   | SER | A | 193 | 5.408  | 0.064   | 15.996 | 1.00 | 10.26 | C   |
| ATOM | 1502 | O   | SER | A | 193 | 6.136  | -0.909  | 16.173 | 1.00 | 8.48  | O   |
| ATOM | 1503 | CB  | SER | A | 193 | 6.802  | 1.089   | 14.258 | 1.00 | 15.39 | C   |
| ATOM | 1504 | OG  | SER | A | 193 | 7.526  | 1.680   | 15.322 | 1.00 | 15.80 | O   |
| ATOM | 1505 | N   | ALA | A | 194 | 4.916  | 0.833   | 16.965 | 1.00 | 13.13 | N   |
| ATOM | 1506 | CA  | ALA | A | 194 | 4.875  | 0.494   | 18.384 | 1.00 | 14.96 | C   |
| ATOM | 1507 | C   | ALA | A | 194 | 3.436  | 0.431   | 18.859 | 1.00 | 12.28 | C   |
| ATOM | 1508 | O   | ALA | A | 194 | 3.117  | -0.360  | 19.733 | 1.00 | 16.44 | O   |
| ATOM | 1509 | CB  | ALA | A | 194 | 5.647  | 1.543   | 19.205 | 1.00 | 14.37 | C   |
| ATOM | 1510 | N   | LYS | A | 195 | 2.560  | 1.162   | 18.186 | 1.00 | 8.87  | N   |
| ATOM | 1511 | CA  | LYS | A | 195 | 1.129  | 1.081   | 18.415 | 1.00 | 10.05 | C   |
| ATOM | 1512 | C   | LYS | A | 195 | 0.656  | -0.181  | 17.755 | 1.00 | 9.99  | C   |
| ATOM | 1513 | O   | LYS | A | 195 | -0.535 | -0.421  | 17.682 | 1.00 | 12.22 | O   |
| ATOM | 1514 | CB  | LYS | A | 195 | 0.390  | 2.267   | 17.767 | 1.00 | 12.99 | C   |
| ATOM | 1515 | CG  | LYS | A | 195 | 0.478  | 3.588   | 18.531 | 1.00 | 15.37 | C   |
| ATOM | 1516 | CD  | LYS | A | 195 | 0.179  | 4.787   | 17.664 | 1.00 | 16.04 | C   |
| ATOM | 1517 | CE  | LYS | A | 195 | -1.184 | 5.396   | 17.995 | 1.00 | 19.24 | C   |
| ATOM | 1518 | NZ  | LYS | A | 195 | -1.397 | 6.691   | 17.246 | 1.00 | 20.94 | N1+ |
| ATOM | 1519 | N   | GLN | A | 196 | 1.586  | -0.882  | 17.112 | 1.00 | 13.42 | N   |
| ATOM | 1520 | CA  | GLN | A | 196 | 1.302  | -2.120  | 16.370 | 1.00 | 13.91 | C   |
| ATOM | 1521 | C   | GLN | A | 196 | 1.790  | -3.377  | 17.084 | 1.00 | 13.37 | C   |
| ATOM | 1522 | O   | GLN | A | 196 | 0.998  | -4.282  | 17.270 | 1.00 | 15.65 | O   |
| ATOM | 1523 | CB  | GLN | A | 196 | 1.923  | -2.071  | 14.971 | 1.00 | 13.77 | C   |
| ATOM | 1524 | CG  | GLN | A | 196 | 1.763  | -3.343  | 14.183 | 1.00 | 15.75 | C   |
| ATOM | 1525 | CD  | GLN | A | 196 | 0.630  | -3.266  | 13.192 | 1.00 | 20.39 | C   |
| ATOM | 1526 | NE2 | GLN | A | 196 | -0.021 | -2.104  | 13.132 | 1.00 | 21.97 | N   |
| ATOM | 1527 | OE1 | GLN | A | 196 | 0.344  | -4.228  | 12.470 | 1.00 | 19.31 | O   |
| ATOM | 1528 | N   | ARG | A | 197 | 3.063  | -3.437  | 17.495 | 1.00 | 10.81 | N   |
| ATOM | 1529 | CA  | ARG | A | 197 | 3.666  | -4.683  | 17.989 | 1.00 | 10.56 | C   |
| ATOM | 1530 | C   | ARG | A | 197 | 2.685  | -5.310  | 18.950 | 1.00 | 12.83 | C   |
| ATOM | 1531 | O   | ARG | A | 197 | 2.476  | -6.508  | 18.910 | 1.00 | 14.23 | O   |
| ATOM | 1532 | CB  | ARG | A | 197 | 5.014  | -4.404  | 18.679 | 1.00 | 11.17 | C   |
| ATOM | 1533 | CG  | ARG | A | 197 | 5.808  | -5.620  | 19.258 | 1.00 | 11.07 | C   |
| ATOM | 1534 | CD  | ARG | A | 197 | 5.853  | -6.866  | 18.353 | 1.00 | 8.47  | C   |
| ATOM | 1535 | NE  | ARG | A | 197 | 6.520  | -8.013  | 18.986 | 1.00 | 6.63  | N   |
| ATOM | 1536 | CZ  | ARG | A | 197 | 5.931  | -9.185  | 19.260 | 1.00 | 8.70  | C   |
| ATOM | 1537 | NH1 | ARG | A | 197 | 4.618  | -9.319  | 19.201 | 1.00 | 7.16  | N1+ |
| ATOM | 1538 | NH2 | ARG | A | 197 | 6.645  | -10.211 | 19.706 | 1.00 | 7.19  | N   |
| ATOM | 1539 | N   | LEU | A | 198 | 1.906  | -4.441  | 19.595 | 1.00 | 14.31 | N   |
| ATOM | 1540 | CA  | LEU | A | 198 | 0.664  | -4.783  | 20.286 | 1.00 | 15.62 | C   |
| ATOM | 1541 | C   | LEU | A | 198 | -0.305 | -5.651  | 19.460 | 1.00 | 18.97 | C   |
| ATOM | 1542 | O   | LEU | A | 198 | -0.561 | -6.800  | 19.835 | 1.00 | 22.05 | O   |
| ATOM | 1543 | CB  | LEU | A | 198 | -0.047 | -3.501  | 20.714 | 1.00 | 12.42 | C   |
| ATOM | 1544 | CG  | LEU | A | 198 | -0.455 | -3.324  | 22.174 | 1.00 | 13.86 | C   |
| ATOM | 1545 | CD1 | LEU | A | 198 | -1.936 | -2.970  | 22.232 | 1.00 | 13.35 | C   |
| ATOM | 1546 | CD2 | LEU | A | 198 | -0.162 | -4.573  | 22.987 | 1.00 | 10.76 | C   |
| ATOM | 1547 | N   | LYS | A | 199 | -0.925 | -5.076  | 18.423 | 1.00 | 18.33 | N   |
| ATOM | 1548 | CA  | LYS | A | 199 | -1.898 | -5.785  | 17.578 | 1.00 | 18.04 | C   |
| ATOM | 1549 | C   | LYS | A | 199 | -1.443 | -7.160  | 17.098 | 1.00 | 19.50 | O   |
| ATOM | 1550 | O   | LYS | A | 199 | -2.262 | -7.986  | 16.724 | 1.00 | 20.23 | C   |
| ATOM | 1551 | CB  | LYS | A | 199 | -2.249 | -4.949  | 16.355 | 1.00 | 18.92 | C   |
| ATOM | 1552 | CG  | LYS | A | 199 | -3.608 | -4.261  | 16.389 | 1.00 | 18.14 | C   |
| ATOM | 1553 | CD  | LYS | A | 199 | -3.598 | -2.944  | 15.594 | 1.00 | 13.47 | C   |
| ATOM | 1554 | CE  | LYS | A | 199 | -2.700 | -1.907  | 16.227 | 1.00 | 8.90  | C   |
| ATOM | 1555 | NZ  | LYS | A | 199 | -2.448 | -2.218  | 17.659 | 1.00 | 9.83  | N1+ |
| ATOM | 1556 | N   | CYS | A | 200 | -0.140 | -7.375  | 17.001 | 1.00 | 21.92 | N   |
| ATOM | 1557 | CA  | CYS | A | 200 | 0.372  | -8.717  | 16.755 | 1.00 | 23.15 | C   |
| ATOM | 1558 | C   | CYS | A | 200 | 0.459  | -9.453  | 18.071 | 1.00 | 25.39 | C   |
| ATOM | 1559 | O   | CYS | A | 200 | 0.080  | -10.614 | 18.142 | 1.00 | 29.62 | O   |



|      |      |     |     |   |     |         |         |        |      |       |     |
|------|------|-----|-----|---|-----|---------|---------|--------|------|-------|-----|
| ATOM | 1560 | CB  | CYS | A | 200 | 1.762   | -8.682  | 16.118 | 1.00 | 22.40 | C   |
| ATOM | 1561 | SG  | CYS | A | 200 | 1.793   | -7.924  | 14.469 | 1.00 | 21.69 | S   |
| ATOM | 1562 | N   | ALA | A | 201 | 0.949   | -8.778  | 19.114 | 1.00 | 26.47 | N   |
| ATOM | 1563 | CA  | ALA | A | 201 | 1.139   | -9.381  | 20.440 | 1.00 | 23.93 | C   |
| ATOM | 1564 | C   | ALA | A | 201 | -0.165  | -9.943  | 20.993 | 1.00 | 21.85 | C   |
| ATOM | 1565 | O   | ALA | A | 201 | -0.208  | -11.107 | 21.360 | 1.00 | 20.07 | O   |
| ATOM | 1566 | CB  | ALA | A | 201 | 1.740   | -8.371  | 21.408 | 1.00 | 24.67 | C   |
| ATOM | 1567 | N   | SER | A | 202 | -1.245  | -9.173  | 20.919 | 1.00 | 20.21 | N   |
| ATOM | 1568 | CA  | SER | A | 202 | -2.584  | -9.760  | 20.944 | 1.00 | 22.62 | C   |
| ATOM | 1569 | C   | SER | A | 202 | -2.608  | -11.018 | 20.056 | 1.00 | 23.67 | C   |
| ATOM | 1570 | O   | SER | A | 202 | -2.798  | -12.128 | 20.544 | 1.00 | 24.94 | O   |
| ATOM | 1571 | CB  | SER | A | 202 | -3.644  | -8.779  | 20.400 | 1.00 | 23.40 | C   |
| ATOM | 1572 | OG  | SER | A | 202 | -3.857  | -7.642  | 21.221 | 1.00 | 23.09 | O   |
| ATOM | 1573 | N   | LEU | A | 203 | -2.326  | -10.847 | 18.765 | 1.00 | 24.01 | N   |
| ATOM | 1574 | CA  | LEU | A | 203 | -2.674  | -11.850 | 17.762 | 1.00 | 22.30 | C   |
| ATOM | 1575 | C   | LEU | A | 203 | -2.159  | -13.281 | 17.940 | 1.00 | 20.69 | C   |
| ATOM | 1576 | O   | LEU | A | 203 | -2.961  | -14.201 | 17.903 | 1.00 | 20.01 | O   |
| ATOM | 1577 | CB  | LEU | A | 203 | -2.320  | -11.341 | 16.368 | 1.00 | 21.07 | C   |
| ATOM | 1578 | CG  | LEU | A | 203 | -3.523  | -11.255 | 15.429 | 1.00 | 20.68 | C   |
| ATOM | 1579 | CD1 | LEU | A | 203 | -4.289  | -12.558 | 15.445 | 1.00 | 22.29 | C   |
| ATOM | 1580 | CD2 | LEU | A | 203 | -4.410  | -10.140 | 15.868 | 1.00 | 20.27 | C   |
| ATOM | 1581 | N   | GLN | A | 204 | -0.843  | -13.487 | 17.919 | 1.00 | 20.66 | N   |
| ATOM | 1582 | CA  | GLN | A | 204 | -0.277  | -14.834 | 18.099 | 1.00 | 23.10 | C   |
| ATOM | 1583 | C   | GLN | A | 204 | 1.062   | -14.932 | 18.874 | 1.00 | 24.84 | C   |
| ATOM | 1584 | O   | GLN | A | 204 | 1.816   | -15.917 | 18.736 | 1.00 | 25.14 | O   |
| ATOM | 1585 | CB  | GLN | A | 204 | -0.135  | -15.567 | 16.762 | 1.00 | 22.96 | C   |
| ATOM | 1586 | CG  | GLN | A | 204 | -0.633  | -14.814 | 15.556 | 1.00 | 24.32 | C   |
| ATOM | 1587 | CD  | GLN | A | 204 | 0.297   | -14.952 | 14.367 | 1.00 | 23.07 | C   |
| ATOM | 1588 | NE2 | GLN | A | 204 | 0.408   | -13.888 | 13.570 | 1.00 | 22.46 | N   |
| ATOM | 1589 | OE1 | GLN | A | 204 | 0.920   | -15.990 | 14.175 | 1.00 | 21.96 | O   |
| ATOM | 1590 | N   | LYS | A | 205 | 1.345   | -13.922 | 19.695 | 1.00 | 21.97 | N   |
| ATOM | 1591 | CA  | LYS | A | 205 | 2.050   | -14.152 | 20.952 | 1.00 | 18.40 | C   |
| ATOM | 1592 | C   | LYS | A | 205 | 0.998   | -14.276 | 22.063 | 1.00 | 14.76 | C   |
| ATOM | 1593 | O   | LYS | A | 205 | 1.311   | -14.599 | 23.192 | 1.00 | 13.45 | O   |
| ATOM | 1594 | CB  | LYS | A | 205 | 3.020   | -13.007 | 21.232 | 1.00 | 19.14 | C   |
| ATOM | 1595 | CG  | LYS | A | 205 | 2.841   | -12.327 | 22.558 | 1.00 | 18.87 | C   |
| ATOM | 1596 | CD  | LYS | A | 205 | 3.969   | -12.710 | 23.485 | 1.00 | 21.97 | C   |
| ATOM | 1597 | CE  | LYS | A | 205 | 5.126   | -11.720 | 23.351 | 1.00 | 23.57 | C   |
| ATOM | 1598 | NZ  | LYS | A | 205 | 6.410   | -12.330 | 23.789 | 1.00 | 23.75 | N1+ |
| ATOM | 1599 | N   | PHE | A | 206 | -0.253  | -14.040 | 21.707 | 1.00 | 12.24 | N   |
| ATOM | 1600 | CA  | PHE | A | 206 | -1.395  | -14.291 | 22.578 | 1.00 | 13.28 | C   |
| ATOM | 1601 | C   | PHE | A | 206 | -2.440  | -14.872 | 21.656 | 1.00 | 13.87 | C   |
| ATOM | 1602 | O   | PHE | A | 206 | -2.389  | -14.638 | 20.459 | 1.00 | 15.15 | O   |
| ATOM | 1603 | CB  | PHE | A | 206 | -1.945  | -12.972 | 23.110 | 1.00 | 14.11 | C   |
| ATOM | 1604 | CG  | PHE | A | 206 | -1.995  | -12.870 | 24.594 | 1.00 | 8.89  | C   |
| ATOM | 1605 | CD1 | PHE | A | 206 | -0.961  | -12.280 | 25.264 | 1.00 | 7.13  | C   |
| ATOM | 1606 | CD2 | PHE | A | 206 | -3.173  | -13.071 | 25.251 | 1.00 | 6.33  | C   |
| ATOM | 1607 | CE1 | PHE | A | 206 | -1.102  | -11.880 | 26.508 | 1.00 | 7.41  | C   |
| ATOM | 1608 | CE2 | PHE | A | 206 | -3.317  | -12.670 | 26.507 | 1.00 | 8.37  | C   |
| ATOM | 1609 | CZ  | PHE | A | 206 | -2.278  | -12.066 | 27.139 | 1.00 | 9.60  | C   |
| ATOM | 1610 | N   | GLY | A | 207 | -3.502  | -15.416 | 22.230 | 1.00 | 14.43 | N   |
| ATOM | 1611 | CA  | GLY | A | 207 | -4.553  | -16.003 | 21.425 | 1.00 | 14.40 | C   |
| ATOM | 1612 | C   | GLY | A | 207 | -5.095  | -15.066 | 20.366 | 1.00 | 15.46 | C   |
| ATOM | 1613 | O   | GLY | A | 207 | -5.411  | -13.904 | 20.628 | 1.00 | 16.20 | O   |
| ATOM | 1614 | N   | GLU | A | 208 | -5.330  | -15.625 | 19.192 | 1.00 | 15.63 | N   |
| ATOM | 1615 | CA  | GLU | A | 208 | -5.998  | -14.904 | 18.125 | 1.00 | 18.59 | C   |
| ATOM | 1616 | C   | GLU | A | 208 | -7.446  | -14.492 | 18.494 | 1.00 | 19.71 | C   |
| ATOM | 1617 | O   | GLU | A | 208 | -7.997  | -13.540 | 17.917 | 1.00 | 21.56 | O   |
| ATOM | 1618 | CB  | GLU | A | 208 | -5.971  | -15.761 | 16.845 | 1.00 | 18.16 | C   |
| ATOM | 1619 | CG  | GLU | A | 208 | -7.133  | -16.747 | 16.691 | 1.00 | 18.76 | C   |
| ATOM | 1620 | CD  | GLU | A | 208 | -8.245  | -16.193 | 15.814 | 1.00 | 19.03 | C   |
| ATOM | 1621 | OE1 | GLU | A | 208 | -8.448  | -14.963 | 15.793 | 1.00 | 18.38 | O   |
| ATOM | 1622 | OE2 | GLU | A | 208 | -8.860  | -16.979 | 15.069 | 1.00 | 22.62 | O1- |
| ATOM | 1623 | N   | ARG | A | 209 | -8.083  | -15.253 | 19.389 | 1.00 | 18.66 | N   |
| ATOM | 1624 | CA  | ARG | A | 209 | -9.477  | -15.021 | 19.769 | 1.00 | 17.70 | C   |
| ATOM | 1625 | C   | ARG | A | 209 | -9.626  | -13.656 | 20.423 | 1.00 | 18.80 | C   |
| ATOM | 1626 | O   | ARG | A | 209 | -10.580 | -12.930 | 20.170 | 1.00 | 17.41 | O   |
| ATOM | 1627 | CB  | ARG | A | 209 | -9.939  | -16.095 | 20.751 | 1.00 | 17.78 | C   |
| ATOM | 1628 | CG  | ARG | A | 209 | -11.325 | -16.650 | 20.479 | 1.00 | 22.53 | C   |
| ATOM | 1629 | CD  | ARG | A | 209 | -12.149 | -15.748 | 19.536 | 1.00 | 23.84 | C   |
| ATOM | 1630 | NE  | ARG | A | 209 | -12.523 | -14.506 | 20.204 | 1.00 | 25.57 | N   |

|      |      |     |     |   |     |         |         |        |      |       |     |
|------|------|-----|-----|---|-----|---------|---------|--------|------|-------|-----|
| ATOM | 1631 | CZ  | ARG | A | 209 | -13.644 | -13.825 | 19.989 | 1.00 | 25.17 | C   |
| ATOM | 1632 | NH1 | ARG | A | 209 | -14.470 | -14.180 | 19.011 | 1.00 | 27.58 | N1+ |
| ATOM | 1633 | NH2 | ARG | A | 209 | -13.900 | -12.739 | 20.714 | 1.00 | 24.46 | N   |
| ATOM | 1634 | N   | ALA | A | 210 | -8.623  | -13.292 | 21.210 | 1.00 | 22.42 | N   |
| ATOM | 1635 | CA  | ALA | A | 210 | -8.644  | -12.078 | 21.995 | 1.00 | 25.29 | C   |
| ATOM | 1636 | C   | ALA | A | 210 | -8.974  | -10.918 | 21.071 | 1.00 | 27.14 | C   |
| ATOM | 1637 | O   | ALA | A | 210 | -10.042 | -10.313 | 21.208 | 1.00 | 29.89 | O   |
| ATOM | 1638 | CB  | ALA | A | 210 | -7.289  | -11.867 | 22.666 | 1.00 | 24.38 | C   |
| ATOM | 1639 | N   | PHE | A | 211 | -8.173  | -10.760 | 20.012 | 1.00 | 26.77 | N   |
| ATOM | 1640 | CA  | PHE | A | 211 | -8.289  | -9.629  | 19.081 | 1.00 | 23.38 | C   |
| ATOM | 1641 | C   | PHE | A | 211 | -9.721  | -9.257  | 18.741 | 1.00 | 21.80 | C   |
| ATOM | 1642 | O   | PHE | A | 211 | -10.079 | -8.090  | 18.838 | 1.00 | 18.92 | O   |
| ATOM | 1643 | CB  | PHE | A | 211 | -7.543  | -9.926  | 17.788 | 1.00 | 25.16 | C   |
| ATOM | 1644 | CG  | PHE | A | 211 | -7.077  | -8.695  | 17.057 | 1.00 | 26.16 | C   |
| ATOM | 1645 | CD1 | PHE | A | 211 | -6.020  | -7.951  | 17.542 | 1.00 | 25.15 | C   |
| ATOM | 1646 | CD2 | PHE | A | 211 | -7.562  | -8.404  | 15.786 | 1.00 | 25.67 | C   |
| ATOM | 1647 | CE1 | PHE | A | 211 | -5.440  | -6.965  | 16.771 | 1.00 | 23.64 | C   |
| ATOM | 1648 | CE2 | PHE | A | 211 | -6.994  | -7.414  | 15.017 | 1.00 | 23.27 | C   |
| ATOM | 1649 | CZ  | PHE | A | 211 | -5.925  | -6.698  | 15.511 | 1.00 | 25.63 | C   |
| ATOM | 1650 | N   | LYS | A | 212 | -10.536 | -10.244 | 18.363 | 1.00 | 20.64 | N   |
| ATOM | 1651 | CA  | LYS | A | 212 | -11.955 | -10.003 | 18.096 | 1.00 | 20.36 | C   |
| ATOM | 1652 | C   | LYS | A | 212 | -12.497 | -9.141  | 19.218 | 1.00 | 22.63 | C   |
| ATOM | 1653 | O   | LYS | A | 212 | -12.772 | -7.964  | 19.004 | 1.00 | 24.04 | O   |
| ATOM | 1654 | CB  | LYS | A | 212 | -12.748 | -11.308 | 18.044 | 1.00 | 19.99 | C   |
| ATOM | 1655 | CG  | LYS | A | 212 | -13.261 | -11.723 | 16.651 | 1.00 | 22.19 | C   |
| ATOM | 1656 | CD  | LYS | A | 212 | -12.319 | -12.755 | 15.969 | 1.00 | 17.63 | C   |
| ATOM | 1657 | CE  | LYS | A | 212 | -13.061 | -13.725 | 15.077 | 1.00 | 14.45 | C   |
| ATOM | 1658 | NZ  | LYS | A | 212 | -14.268 | -13.106 | 14.457 | 1.00 | 14.02 | N1+ |
| ATOM | 1659 | N   | ALA | A | 213 | -12.384 | -9.642  | 20.446 | 1.00 | 22.31 | N   |
| ATOM | 1660 | CA  | ALA | A | 213 | -12.827 | -8.900  | 21.614 | 1.00 | 21.34 | C   |
| ATOM | 1661 | C   | ALA | A | 213 | -12.149 | -7.537  | 21.705 | 1.00 | 21.10 | C   |
| ATOM | 1662 | O   | ALA | A | 213 | -12.763 | -6.552  | 22.098 | 1.00 | 23.45 | O   |
| ATOM | 1663 | CB  | ALA | A | 213 | -12.569 | -9.696  | 22.871 | 1.00 | 20.73 | C   |
| ATOM | 1664 | N   | TRP | A | 214 | -10.922 | -7.437  | 21.240 | 1.00 | 19.46 | N   |
| ATOM | 1665 | CA  | TRP | A | 214 | -10.271 | -6.142  | 21.224 | 1.00 | 19.15 | C   |
| ATOM | 1666 | C   | TRP | A | 214 | -11.048 | -5.224  | 20.314 | 1.00 | 18.85 | C   |
| ATOM | 1667 | O   | TRP | A | 214 | -11.516 | -4.175  | 20.734 | 1.00 | 20.49 | O   |
| ATOM | 1668 | CB  | TRP | A | 214 | -8.870  | -6.296  | 20.686 | 1.00 | 22.36 | C   |
| ATOM | 1669 | CG  | TRP | A | 214 | -7.861  | -5.482  | 21.350 | 1.00 | 24.56 | C   |
| ATOM | 1670 | CD1 | TRP | A | 214 | -6.926  | -5.942  | 22.246 | 1.00 | 26.33 | C   |
| ATOM | 1671 | CD2 | TRP | A | 214 | -7.377  | -4.211  | 20.888 | 1.00 | 25.12 | C   |
| ATOM | 1672 | CE2 | TRP | A | 214 | -6.120  | -4.005  | 21.484 | 1.00 | 28.85 | C   |
| ATOM | 1673 | CE3 | TRP | A | 214 | -7.863  | -3.267  | 19.975 | 1.00 | 21.79 | C   |
| ATOM | 1674 | NE1 | TRP | A | 214 | -5.867  | -5.073  | 22.305 | 1.00 | 31.06 | N   |
| ATOM | 1675 | CZ2 | TRP | A | 214 | -5.341  | -2.887  | 21.189 | 1.00 | 28.30 | C   |
| ATOM | 1676 | CZ3 | TRP | A | 214 | -7.100  | -2.178  | 19.689 | 1.00 | 18.16 | C   |
| ATOM | 1677 | CH2 | TRP | A | 214 | -5.852  | -1.991  | 20.287 | 1.00 | 25.36 | C   |
| ATOM | 1678 | N   | ALA | A | 215 | -11.279 | -5.677  | 19.092 | 1.00 | 18.46 | N   |
| ATOM | 1679 | CA  | ALA | A | 215 | -11.815 | -4.819  | 18.056 | 1.00 | 18.34 | C   |
| ATOM | 1680 | C   | ALA | A | 215 | -13.346 | -4.685  | 18.072 | 1.00 | 19.69 | C   |
| ATOM | 1681 | O   | ALA | A | 215 | -13.853 | -3.636  | 17.695 | 1.00 | 19.89 | O   |
| ATOM | 1682 | CB  | ALA | A | 215 | -11.337 | -5.295  | 16.705 | 1.00 | 17.27 | C   |
| ATOM | 1683 | N   | VAL | A | 216 | -14.074 | -5.711  | 18.532 | 1.00 | 19.07 | N   |
| ATOM | 1684 | CA  | VAL | A | 216 | -15.533 | -5.613  | 18.768 | 1.00 | 18.57 | C   |
| ATOM | 1685 | C   | VAL | A | 216 | -15.801 | -4.635  | 19.911 | 1.00 | 16.42 | C   |
| ATOM | 1686 | O   | VAL | A | 216 | -16.854 | -4.013  | 19.985 | 1.00 | 16.02 | O   |
| ATOM | 1687 | CB  | VAL | A | 216 | -16.199 | -6.979  | 19.159 | 1.00 | 18.60 | C   |
| ATOM | 1688 | CG1 | VAL | A | 216 | -17.658 | -6.980  | 18.765 | 1.00 | 18.91 | C   |
| ATOM | 1689 | CG2 | VAL | A | 216 | -15.530 | -8.129  | 18.488 | 1.00 | 18.58 | C   |
| ATOM | 1690 | N   | ALA | A | 217 | -14.860 | -4.555  | 20.837 | 1.00 | 15.89 | N   |
| ATOM | 1691 | CA  | ALA | A | 217 | -14.811 | -3.444  | 21.767 | 1.00 | 17.11 | C   |
| ATOM | 1692 | C   | ALA | A | 217 | -14.553 | -2.125  | 21.050 | 1.00 | 17.79 | C   |
| ATOM | 1693 | O   | ALA | A | 217 | -15.155 | -1.114  | 21.413 | 1.00 | 20.39 | O   |
| ATOM | 1694 | CB  | ALA | A | 217 | -13.734 | -3.679  | 22.827 | 1.00 | 17.06 | C   |
| ATOM | 1695 | N   | ARG | A | 218 | -13.664 | -2.114  | 20.050 | 1.00 | 16.98 | N   |
| ATOM | 1696 | CA  | ARG | A | 218 | -13.190 | -0.845  | 19.494 | 1.00 | 14.92 | C   |
| ATOM | 1697 | C   | ARG | A | 218 | -13.902 | -0.275  | 18.310 | 1.00 | 13.69 | C   |
| ATOM | 1698 | O   | ARG | A | 218 | -14.093 | 0.920   | 18.241 | 1.00 | 17.63 | O   |
| ATOM | 1699 | CB  | ARG | A | 218 | -11.717 | -0.886  | 19.162 | 1.00 | 16.75 | C   |
| ATOM | 1700 | CG  | ARG | A | 218 | -11.031 | 0.429   | 19.482 | 1.00 | 20.34 | C   |
| ATOM | 1701 | CD  | ARG | A | 218 | -9.529  | 0.272   | 19.350 | 1.00 | 28.41 | C   |

|      |      |     |     |   |     |         |        |        |      |       |     |
|------|------|-----|-----|---|-----|---------|--------|--------|------|-------|-----|
| ATOM | 1702 | NE  | ARG | A | 218 | -8.742  | 0.955  | 20.381 | 1.00 | 31.43 | N   |
| ATOM | 1703 | CZ  | ARG | A | 218 | -7.410  | 0.999  | 20.357 | 1.00 | 31.18 | C   |
| ATOM | 1704 | NH1 | ARG | A | 218 | -6.781  | 0.627  | 19.249 | 1.00 | 33.54 | N1+ |
| ATOM | 1705 | NH2 | ARG | A | 218 | -6.709  | 1.463  | 21.392 | 1.00 | 28.29 | N   |
| ATOM | 1706 | N   | LEU | A | 219 | -14.188 | -1.074 | 17.304 | 1.00 | 13.67 | N   |
| ATOM | 1707 | CA  | LEU | A | 219 | -14.863 | -0.525 | 16.134 | 1.00 | 13.57 | C   |
| ATOM | 1708 | C   | LEU | A | 219 | -16.279 | -0.119 | 16.523 | 1.00 | 13.16 | C   |
| ATOM | 1709 | O   | LEU | A | 219 | -16.875 | 0.721  | 15.861 | 1.00 | 11.91 | O   |
| ATOM | 1710 | CB  | LEU | A | 219 | -14.861 | -1.538 | 14.977 | 1.00 | 12.34 | C   |
| ATOM | 1711 | CG  | LEU | A | 219 | -13.507 | -2.219 | 14.718 | 1.00 | 11.08 | C   |
| ATOM | 1712 | CD1 | LEU | A | 219 | -13.701 | -3.486 | 13.935 | 1.00 | 12.13 | C   |
| ATOM | 1713 | CD2 | LEU | A | 219 | -12.585 | -1.277 | 13.980 | 1.00 | 10.31 | C   |
| ATOM | 1714 | N   | SER | A | 220 | -16.711 | -0.572 | 17.704 | 1.00 | 13.60 | N   |
| ATOM | 1715 | CA  | SER | A | 220 | -18.039 | -0.287 | 18.266 | 1.00 | 13.96 | C   |
| ATOM | 1716 | C   | SER | A | 220 | -18.006 | 0.971  | 19.116 | 1.00 | 13.33 | C   |
| ATOM | 1717 | O   | SER | A | 220 | -19.027 | 1.613  | 19.324 | 1.00 | 12.54 | O   |
| ATOM | 1718 | CB  | SER | A | 220 | -18.527 | -1.462 | 19.127 | 1.00 | 15.85 | C   |
| ATOM | 1719 | OG  | SER | A | 220 | -19.168 | -2.479 | 18.357 | 1.00 | 16.62 | O   |
| ATOM | 1720 | N   | GLN | A | 221 | -16.798 | 1.360  | 19.507 | 1.00 | 15.03 | N   |
| ATOM | 1721 | CA  | GLN | A | 221 | -16.498 | 2.618  | 20.203 | 1.00 | 14.21 | C   |
| ATOM | 1722 | C   | GLN | A | 221 | -16.470 | 3.821  | 19.238 | 1.00 | 15.97 | C   |
| ATOM | 1723 | O   | GLN | A | 221 | -16.314 | 4.959  | 19.669 | 1.00 | 17.34 | O   |
| ATOM | 1724 | CB  | GLN | A | 221 | -15.127 | 2.473  | 20.843 | 1.00 | 13.10 | C   |
| ATOM | 1725 | CG  | GLN | A | 221 | -14.878 | 3.266  | 22.062 | 1.00 | 20.06 | C   |
| ATOM | 1726 | CD  | GLN | A | 221 | -14.119 | 2.455  | 23.085 | 1.00 | 24.79 | C   |
| ATOM | 1727 | NE2 | GLN | A | 221 | -14.716 | 2.285  | 24.265 | 1.00 | 27.31 | N   |
| ATOM | 1728 | OE1 | GLN | A | 221 | -13.066 | 1.884  | 22.784 | 1.00 | 24.46 | O   |
| ATOM | 1729 | N   | ARG | A | 222 | -16.391 | 3.530  | 17.937 | 1.00 | 16.06 | N   |
| ATOM | 1730 | CA  | ARG | A | 222 | -16.293 | 4.545  | 16.884 | 1.00 | 14.67 | C   |
| ATOM | 1731 | C   | ARG | A | 222 | -17.453 | 4.450  | 15.874 | 1.00 | 14.79 | C   |
| ATOM | 1732 | O   | ARG | A | 222 | -17.942 | 5.455  | 15.360 | 1.00 | 16.58 | O   |
| ATOM | 1733 | CB  | ARG | A | 222 | -14.951 | 4.423  | 16.141 | 1.00 | 13.32 | C   |
| ATOM | 1734 | CG  | ARG | A | 222 | -13.933 | 3.526  | 16.803 | 1.00 | 10.78 | C   |
| ATOM | 1735 | CD  | ARG | A | 222 | -12.562 | 4.147  | 16.820 | 1.00 | 14.99 | C   |
| ATOM | 1736 | NE  | ARG | A | 222 | -11.738 | 3.584  | 17.887 | 1.00 | 16.71 | N   |
| ATOM | 1737 | CZ  | ARG | A | 222 | -10.937 | 4.294  | 18.683 | 1.00 | 17.32 | C   |
| ATOM | 1738 | NH1 | ARG | A | 222 | -10.806 | 5.607  | 18.507 | 1.00 | 16.06 | N1+ |
| ATOM | 1739 | NH2 | ARG | A | 222 | -10.252 | 3.687  | 19.654 | 1.00 | 12.90 | N   |
| ATOM | 1740 | N   | PHE | A | 223 | -17.957 | 3.250  | 15.647 | 1.00 | 14.56 | N   |
| ATOM | 1741 | CA  | PHE | A | 223 | -19.111 | 3.084  | 14.792 | 1.00 | 12.35 | C   |
| ATOM | 1742 | C   | PHE | A | 223 | -20.298 | 2.602  | 15.626 | 1.00 | 13.17 | C   |
| ATOM | 1743 | O   | PHE | A | 223 | -20.916 | 1.601  | 15.272 | 1.00 | 12.50 | O   |
| ATOM | 1744 | CB  | PHE | A | 223 | -18.820 | 2.042  | 13.706 | 1.00 | 15.57 | C   |
| ATOM | 1745 | CG  | PHE | A | 223 | -17.648 | 2.373  | 12.788 | 1.00 | 18.20 | C   |
| ATOM | 1746 | CD1 | PHE | A | 223 | -16.762 | 3.398  | 13.060 | 1.00 | 18.12 | C   |
| ATOM | 1747 | CD2 | PHE | A | 223 | -17.389 | 1.571  | 11.689 | 1.00 | 19.72 | C   |
| ATOM | 1748 | CE1 | PHE | A | 223 | -15.642 | 3.594  | 12.261 | 1.00 | 20.71 | C   |
| ATOM | 1749 | CE2 | PHE | A | 223 | -16.274 | 1.765  | 10.896 | 1.00 | 18.61 | C   |
| ATOM | 1750 | CZ  | PHE | A | 223 | -15.401 | 2.767  | 11.182 | 1.00 | 18.31 | C   |
| ATOM | 1751 | N   | PRO | A | 224 | -20.667 | 3.323  | 16.717 | 1.00 | 14.94 | N   |
| ATOM | 1752 | CA  | PRO | A | 224 | -21.635 | 2.860  | 17.714 | 1.00 | 14.17 | C   |
| ATOM | 1753 | C   | PRO | A | 224 | -23.096 | 2.979  | 17.275 | 1.00 | 15.44 | C   |
| ATOM | 1754 | O   | PRO | A | 224 | -23.942 | 3.488  | 18.004 | 1.00 | 16.00 | O   |
| ATOM | 1755 | CB  | PRO | A | 224 | -21.344 | 3.757  | 18.900 | 1.00 | 13.07 | C   |
| ATOM | 1756 | CG  | PRO | A | 224 | -21.074 | 5.010  | 18.284 | 1.00 | 14.26 | C   |
| ATOM | 1757 | CD  | PRO | A | 224 | -20.226 | 4.679  | 17.073 | 1.00 | 17.21 | C   |
| ATOM | 1758 | N   | LYS | A | 225 | -23.347 | 2.630  | 16.026 | 1.00 | 15.99 | N   |
| ATOM | 1759 | CA  | LYS | A | 225 | -24.668 | 2.300  | 15.555 | 1.00 | 15.34 | C   |
| ATOM | 1760 | C   | LYS | A | 225 | -24.515 | 1.109  | 14.603 | 1.00 | 20.08 | C   |
| ATOM | 1761 | O   | LYS | A | 225 | -25.481 | 0.396  | 14.332 | 1.00 | 23.63 | O   |
| ATOM | 1762 | CB  | LYS | A | 225 | -25.285 | 3.490  | 14.839 | 1.00 | 10.48 | C   |
| ATOM | 1763 | CG  | LYS | A | 225 | -24.358 | 4.174  | 13.887 | 1.00 | 10.33 | C   |
| ATOM | 1764 | CD  | LYS | A | 225 | -24.354 | 5.652  | 14.130 | 1.00 | 9.50  | C   |
| ATOM | 1765 | CE  | LYS | A | 225 | -25.685 | 6.266  | 13.772 | 1.00 | 11.24 | C   |
| ATOM | 1766 | NZ  | LYS | A | 225 | -25.779 | 7.709  | 14.196 | 1.00 | 13.92 | N1+ |
| ATOM | 1767 | N   | ALA | A | 226 | -23.282 | 0.839  | 14.171 | 1.00 | 21.60 | N   |
| ATOM | 1768 | CA  | ALA | A | 226 | -22.963 | -0.387 | 13.446 | 1.00 | 22.74 | C   |
| ATOM | 1769 | C   | ALA | A | 226 | -23.686 | -1.533 | 14.133 | 1.00 | 23.96 | C   |
| ATOM | 1770 | O   | ALA | A | 226 | -23.520 | -1.710 | 15.331 | 1.00 | 28.06 | O   |
| ATOM | 1771 | CB  | ALA | A | 226 | -21.474 | -0.630 | 13.497 | 1.00 | 21.05 | C   |
| ATOM | 1772 | N   | GLU | A | 227 | -24.595 | -2.212 | 13.446 | 1.00 | 23.06 | N   |

|      |      |     |     |   |     |         |         |        |      |       |     |
|------|------|-----|-----|---|-----|---------|---------|--------|------|-------|-----|
| ATOM | 1773 | CA  | GLU | A | 227 | -25.267 | -3.340  | 14.079 | 1.00 | 20.89 | C   |
| ATOM | 1774 | C   | GLU | A | 227 | -24.243 | -4.476  | 14.307 | 1.00 | 18.38 | C   |
| ATOM | 1775 | O   | GLU | A | 227 | -23.142 | -4.455  | 13.748 | 1.00 | 11.59 | O   |
| ATOM | 1776 | CB  | GLU | A | 227 | -26.507 | -3.810  | 13.258 | 1.00 | 22.63 | C   |
| ATOM | 1777 | CG  | GLU | A | 227 | -27.720 | -2.794  | 13.205 | 1.00 | 26.40 | C   |
| ATOM | 1778 | CD  | GLU | A | 227 | -28.944 | -3.104  | 14.146 | 1.00 | 29.49 | C   |
| ATOM | 1779 | OE1 | GLU | A | 227 | -28.945 | -4.106  | 14.913 | 1.00 | 29.48 | O   |
| ATOM | 1780 | OE2 | GLU | A | 227 | -29.925 | -2.315  | 14.120 | 1.00 | 26.69 | O1- |
| ATOM | 1781 | N   | PHE | A | 228 | -24.524 | -5.295  | 15.321 | 1.00 | 19.59 | N   |
| ATOM | 1782 | CA  | PHE | A | 228 | -23.714 | -6.468  | 15.669 | 1.00 | 21.16 | C   |
| ATOM | 1783 | C   | PHE | A | 228 | -23.418 | -7.380  | 14.467 | 1.00 | 22.82 | C   |
| ATOM | 1784 | O   | PHE | A | 228 | -22.343 | -8.002  | 14.393 | 1.00 | 22.75 | O   |
| ATOM | 1785 | CB  | PHE | A | 228 | -24.392 | -7.285  | 16.798 | 1.00 | 19.31 | C   |
| ATOM | 1786 | CG  | PHE | A | 228 | -23.470 | -8.270  | 17.481 | 1.00 | 15.55 | C   |
| ATOM | 1787 | CD1 | PHE | A | 228 | -22.401 | -7.826  | 18.231 | 1.00 | 11.82 | C   |
| ATOM | 1788 | CD2 | PHE | A | 228 | -23.598 | -9.636  | 17.254 | 1.00 | 13.74 | C   |
| ATOM | 1789 | CE1 | PHE | A | 228 | -21.482 | -8.709  | 18.727 | 1.00 | 11.35 | C   |
| ATOM | 1790 | CE2 | PHE | A | 228 | -22.675 | -10.526 | 17.751 | 1.00 | 10.57 | C   |
| ATOM | 1791 | CZ  | PHE | A | 228 | -21.620 | -10.067 | 18.485 | 1.00 | 10.53 | C   |
| ATOM | 1792 | N   | ALA | A | 229 | -24.362 | -7.472  | 13.532 | 1.00 | 22.31 | N   |
| ATOM | 1793 | CA  | ALA | A | 229 | -24.033 | -7.999  | 12.215 | 1.00 | 21.94 | C   |
| ATOM | 1794 | C   | ALA | A | 229 | -22.699 | -7.383  | 11.737 | 1.00 | 22.28 | C   |
| ATOM | 1795 | O   | ALA | A | 229 | -21.645 | -7.988  | 11.955 | 1.00 | 22.58 | O   |
| ATOM | 1796 | CB  | ALA | A | 229 | -25.157 | -7.698  | 11.238 | 1.00 | 18.80 | C   |
| ATOM | 1797 | N   | GLU | A | 230 | -22.718 | -6.071  | 11.494 | 1.00 | 23.17 | N   |
| ATOM | 1798 | CA  | GLU | A | 230 | -21.634 | -5.373  | 10.779 | 1.00 | 22.57 | C   |
| ATOM | 1799 | C   | GLU | A | 230 | -20.289 | -5.093  | 11.487 | 1.00 | 21.60 | C   |
| ATOM | 1800 | O   | GLU | A | 230 | -19.291 | -4.855  | 10.813 | 1.00 | 20.95 | O   |
| ATOM | 1801 | CB  | GLU | A | 230 | -22.147 | -4.061  | 10.165 | 1.00 | 19.48 | C   |
| ATOM | 1802 | CG  | GLU | A | 230 | -21.896 | -3.975  | 8.671  | 1.00 | 17.15 | C   |
| ATOM | 1803 | CD  | GLU | A | 230 | -22.865 | -4.813  | 7.850  | 1.00 | 17.55 | C   |
| ATOM | 1804 | OE1 | GLU | A | 230 | -23.995 | -4.329  | 7.598  | 1.00 | 17.87 | O   |
| ATOM | 1805 | OE2 | GLU | A | 230 | -22.488 | -5.926  | 7.409  | 1.00 | 15.08 | O1- |
| ATOM | 1806 | N   | VAL | A | 231 | -20.231 | -5.073  | 12.814 | 1.00 | 20.69 | N   |
| ATOM | 1807 | CA  | VAL | A | 231 | -18.917 | -5.007  | 13.435 | 1.00 | 16.38 | C   |
| ATOM | 1808 | C   | VAL | A | 231 | -18.287 | -6.364  | 13.136 | 1.00 | 20.32 | C   |
| ATOM | 1809 | O   | VAL | A | 231 | -17.101 | -6.442  | 12.828 | 1.00 | 21.55 | O   |
| ATOM | 1810 | CB  | VAL | A | 231 | -18.978 | -4.758  | 14.964 | 1.00 | 12.08 | C   |
| ATOM | 1811 | CG1 | VAL | A | 231 | -17.812 | -5.401  | 15.645 | 1.00 | 11.97 | C   |
| ATOM | 1812 | CG2 | VAL | A | 231 | -18.937 | -3.285  | 15.262 | 1.00 | 11.69 | C   |
| ATOM | 1813 | N   | SER | A | 232 | -19.108 | -7.408  | 13.049 | 1.00 | 22.30 | N   |
| ATOM | 1814 | CA  | SER | A | 232 | -18.566 | -8.749  | 12.844 | 1.00 | 25.21 | C   |
| ATOM | 1815 | C   | SER | A | 232 | -18.383 | -9.125  | 11.373 | 1.00 | 26.83 | C   |
| ATOM | 1816 | O   | SER | A | 232 | -18.337 | -10.306 | 11.009 | 1.00 | 28.08 | O   |
| ATOM | 1817 | CB  | SER | A | 232 | -19.408 | -9.788  | 13.586 | 1.00 | 25.39 | C   |
| ATOM | 1818 | OG  | SER | A | 232 | -18.793 | -10.070 | 14.841 | 1.00 | 28.11 | O   |
| ATOM | 1819 | N   | LYS | A | 233 | -18.260 | -8.096  | 10.536 | 1.00 | 26.97 | N   |
| ATOM | 1820 | CA  | LYS | A | 233 | -17.661 | -8.228  | 9.225  | 1.00 | 23.19 | C   |
| ATOM | 1821 | C   | LYS | A | 233 | -16.769 | -7.018  | 9.066  | 1.00 | 20.48 | C   |
| ATOM | 1822 | O   | LYS | A | 233 | -16.735 | -6.421  | 8.012  | 1.00 | 21.98 | O   |
| ATOM | 1823 | CB  | LYS | A | 233 | -18.733 | -8.254  | 8.133  | 1.00 | 25.56 | C   |
| ATOM | 1824 | CG  | LYS | A | 233 | -18.198 | -8.687  | 6.754  | 1.00 | 29.24 | C   |
| ATOM | 1825 | CD  | LYS | A | 233 | -19.299 | -9.170  | 5.786  | 1.00 | 28.84 | C   |
| ATOM | 1826 | CE  | LYS | A | 233 | -18.745 | -10.207 | 4.785  | 1.00 | 29.50 | C   |
| ATOM | 1827 | NZ  | LYS | A | 233 | -19.637 | -10.474 | 3.618  | 1.00 | 28.23 | N1+ |
| ATOM | 1828 | N   | LEU | A | 234 | -16.191 | -6.564  | 10.174 | 1.00 | 19.32 | N   |
| ATOM | 1829 | CA  | LEU | A | 234 | -15.119 | -5.570  | 10.155 | 1.00 | 19.26 | C   |
| ATOM | 1830 | C   | LEU | A | 234 | -13.971 | -6.022  | 11.075 | 1.00 | 20.45 | C   |
| ATOM | 1831 | O   | LEU | A | 234 | -12.798 | -5.927  | 10.710 | 1.00 | 20.91 | O   |
| ATOM | 1832 | CB  | LEU | A | 234 | -15.623 | -4.191  | 10.598 | 1.00 | 18.55 | C   |
| ATOM | 1833 | CG  | LEU | A | 234 | -16.945 | -3.619  | 10.054 | 1.00 | 20.65 | C   |
| ATOM | 1834 | CD1 | LEU | A | 234 | -17.229 | -2.274  | 10.718 | 1.00 | 20.73 | C   |
| ATOM | 1835 | CD2 | LEU | A | 234 | -16.900 | -3.452  | 8.536  | 1.00 | 18.64 | C   |
| ATOM | 1836 | N   | VAL | A | 235 | -14.308 | -6.626  | 12.214 | 1.00 | 19.59 | N   |
| ATOM | 1837 | CA  | VAL | A | 235 | -13.301 | -7.227  | 13.089 | 1.00 | 16.45 | C   |
| ATOM | 1838 | C   | VAL | A | 235 | -12.927 | -8.677  | 12.704 | 1.00 | 16.23 | C   |
| ATOM | 1839 | O   | VAL | A | 235 | -11.848 | -9.153  | 13.054 | 1.00 | 17.61 | O   |
| ATOM | 1840 | CB  | VAL | A | 235 | -13.756 | -7.164  | 14.556 | 1.00 | 14.01 | C   |
| ATOM | 1841 | CG1 | VAL | A | 235 | -15.208 | -7.513  | 14.660 | 1.00 | 14.30 | C   |
| ATOM | 1842 | CG2 | VAL | A | 235 | -12.943 | -8.102  | 15.421 | 1.00 | 14.29 | C   |
| ATOM | 1843 | N   | THR | A | 236 | -13.808 | -9.361  | 11.976 | 1.00 | 13.39 | N   |

|      |      |     |     |   |     |         |         |        |      |       |     |
|------|------|-----|-----|---|-----|---------|---------|--------|------|-------|-----|
| ATOM | 1844 | CA  | THR | A | 236 | -13.512 | -10.659 | 11.367 | 1.00 | 10.14 | C   |
| ATOM | 1845 | C   | THR | A | 236 | -12.673 | -10.444 | 10.102 | 1.00 | 12.00 | C   |
| ATOM | 1846 | O   | THR | A | 236 | -11.962 | -11.342 | 9.665  | 1.00 | 10.48 | O   |
| ATOM | 1847 | CB  | THR | A | 236 | -14.803 | -11.359 | 10.949 | 1.00 | 9.09  | C   |
| ATOM | 1848 | CG2 | THR | A | 236 | -14.960 | -12.671 | 11.657 | 1.00 | 10.99 | C   |
| ATOM | 1849 | OG1 | THR | A | 236 | -15.914 | -10.525 | 11.281 | 1.00 | 5.10  | O   |
| ATOM | 1850 | N   | ASP | A | 237 | -12.708 | -9.207  | 9.592  | 1.00 | 13.66 | N   |
| ATOM | 1851 | CA  | ASP | A | 237 | -12.113 | -8.807  | 8.320  | 1.00 | 12.69 | C   |
| ATOM | 1852 | C   | ASP | A | 237 | -10.804 | -8.086  | 8.567  | 1.00 | 16.23 | C   |
| ATOM | 1853 | O   | ASP | A | 237 | -10.160 | -7.609  | 7.622  | 1.00 | 17.55 | O   |
| ATOM | 1854 | CB  | ASP | A | 237 | -13.052 | -7.857  | 7.581  | 1.00 | 9.81  | C   |
| ATOM | 1855 | CG  | ASP | A | 237 | -14.195 | -8.580  | 6.879  | 1.00 | 15.79 | C   |
| ATOM | 1856 | OD1 | ASP | A | 237 | -14.151 | -9.824  | 6.788  | 1.00 | 20.11 | O   |
| ATOM | 1857 | OD2 | ASP | A | 237 | -15.114 | -7.914  | 6.350  | 1.00 | 14.61 | O1- |
| ATOM | 1858 | N   | LEU | A | 238 | -10.504 | -7.875  | 9.849  | 1.00 | 17.84 | N   |
| ATOM | 1859 | CA  | LEU | A | 238 | -9.376  | -7.046  | 10.284 | 1.00 | 17.70 | C   |
| ATOM | 1860 | C   | LEU | A | 238 | -8.366  | -7.946  | 10.952 | 1.00 | 17.11 | C   |
| ATOM | 1861 | O   | LEU | A | 238 | -7.171  | -7.656  | 10.954 | 1.00 | 18.24 | O   |
| ATOM | 1862 | CB  | LEU | A | 238 | -9.830  | -6.016  | 11.310 | 1.00 | 18.48 | C   |
| ATOM | 1863 | CG  | LEU | A | 238 | -9.252  | -4.614  | 11.261 | 1.00 | 15.02 | C   |
| ATOM | 1864 | CD1 | LEU | A | 238 | -10.258 | -3.748  | 10.568 | 1.00 | 13.60 | C   |
| ATOM | 1865 | CD2 | LEU | A | 238 | -8.989  | -4.102  | 12.650 | 1.00 | 11.12 | C   |
| ATOM | 1866 | N   | THR | A | 239 | -8.868  | -8.928  | 11.684 | 1.00 | 15.12 | N   |
| ATOM | 1867 | CA  | THR | A | 239 | -8.031  | -10.025 | 12.104 | 1.00 | 15.74 | C   |
| ATOM | 1868 | C   | THR | A | 239 | -7.229  | -10.453 | 10.851 | 1.00 | 16.69 | C   |
| ATOM | 1869 | O   | THR | A | 239 | -6.120  | -9.942  | 10.661 | 1.00 | 18.36 | O   |
| ATOM | 1870 | CB  | THR | A | 239 | -8.899  | -11.180 | 12.745 | 1.00 | 15.86 | C   |
| ATOM | 1871 | CG2 | THR | A | 239 | -8.061  | -12.423 | 13.008 | 1.00 | 12.44 | C   |
| ATOM | 1872 | OG1 | THR | A | 239 | -9.476  | -10.724 | 13.988 | 1.00 | 7.33  | O   |
| ATOM | 1873 | N   | LYS | A | 240 | -7.899  | -11.064 | 9.873  | 1.00 | 15.75 | N   |
| ATOM | 1874 | CA  | LYS | A | 240 | -7.262  | -11.521 | 8.617  | 1.00 | 14.50 | C   |
| ATOM | 1875 | C   | LYS | A | 240 | -6.100  | -10.649 | 8.114  | 1.00 | 12.60 | C   |
| ATOM | 1876 | O   | LYS | A | 240 | -5.042  | -11.164 | 7.764  | 1.00 | 12.12 | O   |
| ATOM | 1877 | CB  | LYS | A | 240 | -8.314  | -11.608 | 7.513  | 1.00 | 13.34 | C   |
| ATOM | 1878 | CG  | LYS | A | 240 | -8.390  | -12.935 | 6.845  | 1.00 | 16.59 | C   |
| ATOM | 1879 | CD  | LYS | A | 240 | -9.351  | -12.874 | 5.664  | 1.00 | 23.14 | C   |
| ATOM | 1880 | CE  | LYS | A | 240 | -8.943  | -13.846 | 4.544  | 1.00 | 26.65 | C   |
| ATOM | 1881 | NZ  | LYS | A | 240 | -7.629  | -13.487 | 3.874  | 1.00 | 31.21 | N1+ |
| ATOM | 1882 | N   | VAL | A | 241 | -6.361  | -9.349  | 7.966  | 1.00 | 12.72 | N   |
| ATOM | 1883 | CA  | VAL | A | 241 | -5.359  | -8.348  | 7.614  | 1.00 | 9.66  | C   |
| ATOM | 1884 | C   | VAL | A | 241 | -4.266  | -8.481  | 8.636  | 1.00 | 11.94 | C   |
| ATOM | 1885 | O   | VAL | A | 241 | -3.289  | -9.155  | 8.386  | 1.00 | 14.55 | O   |
| ATOM | 1886 | CB  | VAL | A | 241 | -5.909  | -6.900  | 7.705  | 1.00 | 8.96  | C   |
| ATOM | 1887 | CG1 | VAL | A | 241 | -4.808  | -5.903  | 7.469  | 1.00 | 6.95  | C   |
| ATOM | 1888 | CG2 | VAL | A | 241 | -7.030  | -6.681  | 6.719  | 1.00 | 7.52  | C   |
| ATOM | 1889 | N   | HIS | A | 242 | -4.541  | -8.050  | 9.858  | 1.00 | 11.85 | N   |
| ATOM | 1890 | CA  | HIS | A | 242 | -3.490  | -7.939  | 10.863 | 1.00 | 17.50 | C   |
| ATOM | 1891 | C   | HIS | A | 242 | -2.715  | -9.236  | 11.110 | 1.00 | 19.56 | C   |
| ATOM | 1892 | O   | HIS | A | 242 | -1.490  | -9.212  | 11.321 | 1.00 | 19.10 | O   |
| ATOM | 1893 | CB  | HIS | A | 242 | -4.071  | -7.433  | 12.179 | 1.00 | 19.40 | C   |
| ATOM | 1894 | CG  | HIS | A | 242 | -4.033  | -5.949  | 12.311 | 1.00 | 17.51 | C   |
| ATOM | 1895 | CD2 | HIS | A | 242 | -3.023  | -5.113  | 12.638 | 1.00 | 17.18 | C   |
| ATOM | 1896 | ND1 | HIS | A | 242 | -5.063  | -5.146  | 11.870 | 1.00 | 14.59 | N   |
| ATOM | 1897 | CE1 | HIS | A | 242 | -4.680  | -3.885  | 11.896 | 1.00 | 14.07 | C   |
| ATOM | 1898 | NE2 | HIS | A | 242 | -3.445  | -3.842  | 12.360 | 1.00 | 20.83 | N   |
| ATOM | 1899 | N   | THR | A | 243 | -3.419  | -10.364 | 11.043 | 1.00 | 20.29 | N   |
| ATOM | 1900 | CA  | THR | A | 243 | -2.791  | -11.653 | 11.247 | 1.00 | 21.66 | C   |
| ATOM | 1901 | C   | THR | A | 243 | -1.638  | -11.802 | 10.259 | 1.00 | 22.36 | C   |
| ATOM | 1902 | O   | THR | A | 243 | -0.494  | -11.979 | 10.667 | 1.00 | 20.98 | O   |
| ATOM | 1903 | CB  | THR | A | 243 | -3.803  | -12.808 | 11.058 | 1.00 | 22.04 | C   |
| ATOM | 1904 | CG2 | THR | A | 243 | -4.560  | -13.061 | 12.338 | 1.00 | 19.78 | C   |
| ATOM | 1905 | OG1 | THR | A | 243 | -4.743  | -12.465 | 10.030 | 1.00 | 22.04 | O   |
| ATOM | 1906 | N   | GLU | A | 244 | -1.923  | -11.503 | 8.994  | 1.00 | 24.92 | N   |
| ATOM | 1907 | CA  | GLU | A | 244 | -0.963  | -11.634 | 7.884  | 1.00 | 24.81 | C   |
| ATOM | 1908 | C   | GLU | A | 244 | 0.269   | -10.751 | 8.073  | 1.00 | 24.55 | C   |
| ATOM | 1909 | O   | GLU | A | 244 | 1.365   | -11.289 | 8.316  | 1.00 | 25.76 | O   |
| ATOM | 1910 | CB  | GLU | A | 244 | -1.654  | -11.320 | 6.540  | 1.00 | 21.04 | C   |
| ATOM | 1911 | CG  | GLU | A | 244 | -2.417  | -12.526 | 5.981  | 1.00 | 20.42 | C   |
| ATOM | 1912 | CD  | GLU | A | 244 | -3.749  | -12.186 | 5.369  | 1.00 | 16.71 | C   |
| ATOM | 1913 | OE1 | GLU | A | 244 | -3.861  | -11.097 | 4.794  | 1.00 | 19.88 | O   |
| ATOM | 1914 | OE2 | GLU | A | 244 | -4.670  | -13.029 | 5.410  | 1.00 | 15.80 | O1- |

|      |      |     |     |   |     |        |         |        |      |       |     |
|------|------|-----|-----|---|-----|--------|---------|--------|------|-------|-----|
| ATOM | 1915 | N   | CYS | A | 245 | 0.061  | -9.426  | 8.150  | 1.00 | 23.02 | N   |
| ATOM | 1916 | CA  | CYS | A | 245 | 1.148  | -8.466  | 8.429  | 1.00 | 21.48 | C   |
| ATOM | 1917 | C   | CYS | A | 245 | 1.936  | -8.829  | 9.702  | 1.00 | 21.49 | C   |
| ATOM | 1918 | O   | CYS | A | 245 | 2.965  | -8.215  | 10.000 | 1.00 | 20.53 | O   |
| ATOM | 1919 | CB  | CYS | A | 245 | 0.604  | -7.039  | 8.577  | 1.00 | 20.81 | C   |
| ATOM | 1920 | SG  | CYS | A | 245 | 0.340  | -6.068  | 7.058  | 1.00 | 19.72 | S   |
| ATOM | 1921 | N   | CYS | A | 246 | 1.434  | -9.803  | 10.458 | 1.00 | 20.66 | N   |
| ATOM | 1922 | CA  | CYS | A | 246 | 2.133  | -10.288 | 11.635 | 1.00 | 22.93 | C   |
| ATOM | 1923 | C   | CYS | A | 246 | 2.810  | -11.634 | 11.342 | 1.00 | 23.54 | C   |
| ATOM | 1924 | O   | CYS | A | 246 | 4.001  | -11.829 | 11.613 | 1.00 | 23.49 | O   |
| ATOM | 1925 | CB  | CYS | A | 246 | 1.150  | -10.431 | 12.828 | 1.00 | 23.38 | C   |
| ATOM | 1926 | SG  | CYS | A | 246 | 0.340  | -8.909  | 13.476 | 1.00 | 21.26 | S   |
| ATOM | 1927 | N   | HIS | A | 247 | 2.054  | -12.531 | 10.717 | 1.00 | 26.98 | N   |
| ATOM | 1928 | CA  | HIS | A | 247 | 2.461  | -13.924 | 10.463 | 1.00 | 28.41 | C   |
| ATOM | 1929 | C   | HIS | A | 247 | 3.551  | -14.018 | 9.371  | 1.00 | 27.16 | C   |
| ATOM | 1930 | O   | HIS | A | 247 | 3.999  | -15.107 | 8.996  | 1.00 | 24.90 | O   |
| ATOM | 1931 | CB  | HIS | A | 247 | 1.221  | -14.734 | 10.034 | 1.00 | 30.64 | C   |
| ATOM | 1932 | CG  | HIS | A | 247 | 0.887  | -15.871 | 10.953 | 1.00 | 33.09 | C   |
| ATOM | 1933 | CD2 | HIS | A | 247 | 1.675  | -16.666 | 11.718 | 1.00 | 31.19 | C   |
| ATOM | 1934 | ND1 | HIS | A | 247 | -0.397 | -16.372 | 11.077 | 1.00 | 32.64 | N   |
| ATOM | 1935 | CE1 | HIS | A | 247 | -0.383 | -17.423 | 11.881 | 1.00 | 32.18 | C   |
| ATOM | 1936 | NE2 | HIS | A | 247 | 0.859  | -17.616 | 12.285 | 1.00 | 34.75 | N   |
| ATOM | 1937 | N   | GLY | A | 248 | 3.882  | -12.875 | 8.788  | 1.00 | 26.19 | N   |
| ATOM | 1938 | CA  | GLY | A | 248 | 5.010  | -12.822 | 7.893  | 1.00 | 24.62 | C   |
| ATOM | 1939 | C   | GLY | A | 248 | 4.560  | -12.235 | 6.584  | 1.00 | 24.54 | C   |
| ATOM | 1940 | O   | GLY | A | 248 | 5.066  | -11.200 | 6.176  | 1.00 | 25.55 | O   |
| ATOM | 1941 | N   | ASP | A | 249 | 3.553  | -12.847 | 5.966  | 1.00 | 23.88 | N   |
| ATOM | 1942 | CA  | ASP | A | 249 | 3.154  | -12.470 | 4.619  | 1.00 | 20.47 | C   |
| ATOM | 1943 | C   | ASP | A | 249 | 2.317  | -11.215 | 4.621  | 1.00 | 20.76 | C   |
| ATOM | 1944 | O   | ASP | A | 249 | 1.132  | -11.257 | 4.957  | 1.00 | 21.26 | O   |
| ATOM | 1945 | CB  | ASP | A | 249 | 2.408  | -13.612 | 3.903  | 1.00 | 20.40 | C   |
| ATOM | 1946 | CG  | ASP | A | 249 | 1.351  | -14.282 | 4.764  | 1.00 | 18.24 | C   |
| ATOM | 1947 | OD1 | ASP | A | 249 | 1.703  | -15.199 | 5.537  | 1.00 | 19.57 | O   |
| ATOM | 1948 | OD2 | ASP | A | 249 | 0.152  | -14.040 | 4.523  | 1.00 | 17.76 | O1- |
| ATOM | 1949 | N   | LEU | A | 250 | 3.003  | -10.087 | 4.423  | 1.00 | 20.08 | N   |
| ATOM | 1950 | CA  | LEU | A | 250 | 2.373  | -8.789  | 4.180  | 1.00 | 20.75 | C   |
| ATOM | 1951 | C   | LEU | A | 250 | 1.422  | -8.841  | 2.956  | 1.00 | 23.97 | C   |
| ATOM | 1952 | O   | LEU | A | 250 | 0.246  | -9.180  | 3.084  | 1.00 | 24.23 | O   |
| ATOM | 1953 | CB  | LEU | A | 250 | 3.427  | -7.715  | 3.892  | 1.00 | 18.42 | C   |
| ATOM | 1954 | CG  | LEU | A | 250 | 4.765  | -7.394  | 4.537  | 1.00 | 17.52 | C   |
| ATOM | 1955 | CD1 | LEU | A | 250 | 5.333  | -8.472  | 5.381  | 1.00 | 20.69 | C   |
| ATOM | 1956 | CD2 | LEU | A | 250 | 5.689  | -7.106  | 3.393  | 1.00 | 20.41 | C   |
| ATOM | 1957 | N   | LEU | A | 251 | 1.964  | -8.473  | 1.788  | 1.00 | 24.70 | N   |
| ATOM | 1958 | CA  | LEU | A | 251 | 1.273  | -8.329  | 0.499  | 1.00 | 21.99 | C   |
| ATOM | 1959 | C   | LEU | A | 251 | -0.227 | -8.608  | 0.403  | 1.00 | 22.01 | C   |
| ATOM | 1960 | O   | LEU | A | 251 | -0.983 | -7.834  | -0.179 | 1.00 | 19.96 | O   |
| ATOM | 1961 | CB  | LEU | A | 251 | 2.016  | -9.161  | -0.540 | 1.00 | 22.73 | C   |
| ATOM | 1962 | CG  | LEU | A | 251 | 3.503  | -8.825  | -0.674 | 1.00 | 21.62 | C   |
| ATOM | 1963 | CD1 | LEU | A | 251 | 4.302  | -9.609  | 0.354  | 1.00 | 22.59 | C   |
| ATOM | 1964 | CD2 | LEU | A | 251 | 3.972  | -9.145  | -2.085 | 1.00 | 20.79 | C   |
| ATOM | 1965 | N   | GLU | A | 252 | -0.633 | -9.779  | 0.856  | 1.00 | 23.52 | N   |
| ATOM | 1966 | CA  | GLU | A | 252 | -2.053 | -10.078 | 0.994  | 1.00 | 24.95 | C   |
| ATOM | 1967 | C   | GLU | A | 252 | -2.699 | -8.956  | 1.840  | 1.00 | 25.20 | C   |
| ATOM | 1968 | O   | GLU | A | 252 | -3.583 | -8.247  | 1.364  | 1.00 | 26.85 | O   |
| ATOM | 1969 | CB  | GLU | A | 252 | -2.225 | -11.463 | 1.648  | 1.00 | 23.50 | C   |
| ATOM | 1970 | CG  | GLU | A | 252 | -1.702 | -12.659 | 0.793  | 1.00 | 23.59 | C   |
| ATOM | 1971 | CD  | GLU | A | 252 | -0.211 | -12.968 | 0.966  | 1.00 | 22.46 | C   |
| ATOM | 1972 | OE1 | GLU | A | 252 | 0.548  | -12.064 | 1.372  | 1.00 | 21.42 | O   |
| ATOM | 1973 | OE2 | GLU | A | 252 | 0.212  | -14.112 | 0.667  | 1.00 | 20.54 | O1- |
| ATOM | 1974 | N   | CYS | A | 253 | -2.113 | -8.683  | 3.002  | 1.00 | 23.06 | N   |
| ATOM | 1975 | CA  | CYS | A | 253 | -2.418 | -7.509  | 3.825  | 1.00 | 21.89 | C   |
| ATOM | 1976 | C   | CYS | A | 253 | -2.879 | -6.277  | 3.017  | 1.00 | 22.51 | C   |
| ATOM | 1977 | O   | CYS | A | 253 | -4.077 | -5.982  | 2.928  | 1.00 | 18.60 | O   |
| ATOM | 1978 | CB  | CYS | A | 253 | -1.171 | -7.153  | 4.662  | 1.00 | 20.32 | C   |
| ATOM | 1979 | SG  | CYS | A | 253 | -1.466 | -6.653  | 6.385  | 1.00 | 15.33 | S   |
| ATOM | 1980 | N   | ALA | A | 254 | -1.921 | -5.638  | 2.345  | 1.00 | 22.49 | N   |
| ATOM | 1981 | CA  | ALA | A | 254 | -2.105 | -4.310  | 1.755  | 1.00 | 22.36 | C   |
| ATOM | 1982 | C   | ALA | A | 254 | -3.233 | -4.310  | 0.727  | 1.00 | 22.41 | C   |
| ATOM | 1983 | O   | ALA | A | 254 | -3.812 | -3.264  | 0.430  | 1.00 | 20.73 | O   |
| ATOM | 1984 | CB  | ALA | A | 254 | -0.785 | -3.836  | 1.104  | 1.00 | 20.82 | C   |
| ATOM | 1985 | N   | ASP | A | 255 | -3.433 | -5.475  | 0.108  | 1.00 | 23.61 | N   |

|      |      |     |     |   |     |         |        |        |      |       |     |
|------|------|-----|-----|---|-----|---------|--------|--------|------|-------|-----|
| ATOM | 1986 | CA  | ASP | A | 255 | -4.448  | -5.684 | -0.918 | 1.00 | 23.62 | C   |
| ATOM | 1987 | C   | ASP | A | 255 | -5.725  | -5.744 | -0.112 | 1.00 | 24.73 | C   |
| ATOM | 1988 | O   | ASP | A | 255 | -6.638  | -4.941 | -0.353 | 1.00 | 25.80 | O   |
| ATOM | 1989 | CB  | ASP | A | 255 | -4.205  | -7.026 | -1.648 | 1.00 | 24.09 | C   |
| ATOM | 1990 | CG  | ASP | A | 255 | -5.128  | -7.234 | -2.858 | 1.00 | 26.69 | C   |
| ATOM | 1991 | OD1 | ASP | A | 255 | -5.894  | -6.309 | -3.200 | 1.00 | 28.50 | O   |
| ATOM | 1992 | OD2 | ASP | A | 255 | -5.063  | -8.310 | -3.507 | 1.00 | 25.31 | O1- |
| ATOM | 1993 | N   | ASP | A | 256 | -5.645  | -6.478 | 1.009  | 1.00 | 24.05 | N   |
| ATOM | 1994 | CA  | ASP | A | 256 | -6.778  | -6.758 | 1.893  | 1.00 | 21.53 | C   |
| ATOM | 1995 | C   | ASP | A | 256 | -7.408  | -5.507 | 2.499  | 1.00 | 22.11 | C   |
| ATOM | 1996 | O   | ASP | A | 256 | -8.603  | -5.319 | 2.331  | 1.00 | 21.08 | O   |
| ATOM | 1997 | CB  | ASP | A | 256 | -6.375  | -7.720 | 3.009  | 1.00 | 19.32 | C   |
| ATOM | 1998 | CG  | ASP | A | 256 | -6.474  | -9.182 | 2.594  | 1.00 | 21.17 | C   |
| ATOM | 1999 | OD1 | ASP | A | 256 | -7.390  | -9.548 | 1.814  | 1.00 | 17.48 | O   |
| ATOM | 2000 | OD2 | ASP | A | 256 | -5.650  | -9.984 | 3.094  | 1.00 | 19.56 | O1- |
| ATOM | 2001 | N   | ARG | A | 257 | -6.624  | -4.584 | 3.069  | 1.00 | 22.19 | N   |
| ATOM | 2002 | CA  | ARG | A | 257 | -7.214  | -3.327 | 3.566  | 1.00 | 22.80 | C   |
| ATOM | 2003 | C   | ARG | A | 257 | -7.861  | -2.446 | 2.497  | 1.00 | 23.33 | C   |
| ATOM | 2004 | O   | ARG | A | 257 | -8.179  | -1.277 | 2.756  | 1.00 | 24.22 | O   |
| ATOM | 2005 | CB  | ARG | A | 257 | -6.212  | -2.474 | 4.344  | 1.00 | 23.48 | C   |
| ATOM | 2006 | CG  | ARG | A | 257 | -6.912  | -1.398 | 5.220  | 1.00 | 26.53 | C   |
| ATOM | 2007 | CD  | ARG | A | 257 | -6.367  | -1.389 | 6.660  | 1.00 | 32.02 | C   |
| ATOM | 2008 | NE  | ARG | A | 257 | -7.343  | -1.126 | 7.730  | 1.00 | 29.83 | N   |
| ATOM | 2009 | CZ  | ARG | A | 257 | -6.970  | -0.900 | 8.990  | 1.00 | 29.33 | C   |
| ATOM | 2010 | NH1 | ARG | A | 257 | -5.677  | -0.815 | 9.258  | 1.00 | 31.19 | N1+ |
| ATOM | 2011 | NH2 | ARG | A | 257 | -7.857  | -0.700 | 9.970  | 1.00 | 27.88 | N   |
| ATOM | 2012 | N   | ALA | A | 258 | -8.016  | -2.989 | 1.288  | 1.00 | 23.60 | N   |
| ATOM | 2013 | CA  | ALA | A | 258 | -8.843  | -2.381 | 0.247  | 1.00 | 19.06 | C   |
| ATOM | 2014 | C   | ALA | A | 258 | -9.853  | -3.397 | -0.273 | 1.00 | 17.21 | C   |
| ATOM | 2015 | O   | ALA | A | 258 | -11.020 | -3.095 | -0.345 | 1.00 | 16.88 | O   |
| ATOM | 2016 | CB  | ALA | A | 258 | -7.989  | -1.870 | -0.849 | 1.00 | 17.23 | C   |
| ATOM | 2017 | N   | ASP | A | 259 | -9.464  | -4.662 | -0.292 | 1.00 | 18.75 | N   |
| ATOM | 2018 | CA  | ASP | A | 259 | -10.430 | -5.768 | -0.205 | 1.00 | 21.08 | C   |
| ATOM | 2019 | C   | ASP | A | 259 | -11.253 | -5.577 | 1.090  | 1.00 | 19.96 | C   |
| ATOM | 2020 | O   | ASP | A | 259 | -12.159 | -6.365 | 1.380  | 1.00 | 20.42 | O   |
| ATOM | 2021 | CB  | ASP | A | 259 | -9.690  | -7.150 | -0.180 | 1.00 | 24.22 | C   |
| ATOM | 2022 | CG  | ASP | A | 259 | -10.169 | -8.150 | -1.288 | 1.00 | 21.26 | C   |
| ATOM | 2023 | OD1 | ASP | A | 259 | -11.075 | -7.821 | -2.076 | 1.00 | 21.43 | O   |
| ATOM | 2024 | OD2 | ASP | A | 259 | -9.634  | -9.279 | -1.364 | 1.00 | 17.32 | O1- |
| ATOM | 2025 | N   | LEU | A | 260 | -10.848 | -4.617 | 1.924  | 1.00 | 18.38 | N   |
| ATOM | 2026 | CA  | LEU | A | 260 | -11.732 | -4.087 | 2.948  | 1.00 | 19.05 | C   |
| ATOM | 2027 | C   | LEU | A | 260 | -12.198 | -2.692 | 2.561  | 1.00 | 20.78 | C   |
| ATOM | 2028 | O   | LEU | A | 260 | -13.257 | -2.581 | 1.950  | 1.00 | 22.27 | O   |
| ATOM | 2029 | CB  | LEU | A | 260 | -11.087 | -4.076 | 4.334  | 1.00 | 18.98 | C   |
| ATOM | 2030 | CG  | LEU | A | 260 | -11.986 | -4.337 | 5.564  | 1.00 | 15.64 | C   |
| ATOM | 2031 | CD1 | LEU | A | 260 | -11.913 | -3.163 | 6.525  | 1.00 | 14.71 | C   |
| ATOM | 2032 | CD2 | LEU | A | 260 | -13.418 | -4.561 | 5.153  | 1.00 | 12.68 | C   |
| ATOM | 2033 | N   | ALA | A | 261 | -11.398 | -1.651 | 2.801  | 1.00 | 19.14 | N   |
| ATOM | 2034 | CA  | ALA | A | 261 | -11.884 | -0.274 | 2.617  | 1.00 | 20.29 | C   |
| ATOM | 2035 | C   | ALA | A | 261 | -12.836 | -0.069 | 1.445  | 1.00 | 20.76 | C   |
| ATOM | 2036 | O   | ALA | A | 261 | -13.748 | 0.727  | 1.551  | 1.00 | 23.76 | O   |
| ATOM | 2037 | CB  | ALA | A | 261 | -10.738 | 0.703  | 2.506  | 1.00 | 20.41 | C   |
| ATOM | 2038 | N   | LYS | A | 262 | -12.715 | -0.870 | 0.390  | 1.00 | 21.67 | N   |
| ATOM | 2039 | CA  | LYS | A | 262 | -13.724 | -0.914 | -0.678 | 1.00 | 22.13 | C   |
| ATOM | 2040 | C   | LYS | A | 262 | -14.858 | -1.897 | -0.338 | 1.00 | 22.91 | C   |
| ATOM | 2041 | O   | LYS | A | 262 | -15.231 | -2.735 | -1.178 | 1.00 | 24.14 | O   |
| ATOM | 2042 | CB  | LYS | A | 262 | -13.079 | -1.319 | -2.018 | 1.00 | 21.14 | C   |
| ATOM | 2043 | CG  | LYS | A | 262 | -12.745 | -0.182 | -2.958 | 1.00 | 20.45 | C   |
| ATOM | 2044 | CD  | LYS | A | 262 | -13.871 | 0.032  | -3.965 | 1.00 | 22.63 | C   |
| ATOM | 2045 | CE  | LYS | A | 262 | -13.416 | 0.915  | -5.138 | 1.00 | 22.50 | C   |
| ATOM | 2046 | NZ  | LYS | A | 262 | -13.721 | 0.318  | -6.475 | 1.00 | 18.96 | N1+ |
| ATOM | 2047 | N   | TYR | A | 263 | -15.279 | -1.881 | 0.933  | 1.00 | 20.93 | N   |
| ATOM | 2048 | CA  | TYR | A | 263 | -16.547 | -2.447 | 1.416  | 1.00 | 15.95 | C   |
| ATOM | 2049 | C   | TYR | A | 263 | -17.010 | -1.449 | 2.439  | 1.00 | 14.10 | C   |
| ATOM | 2050 | O   | TYR | A | 263 | -17.949 | -0.720 | 2.178  | 1.00 | 16.17 | O   |
| ATOM | 2051 | CB  | TYR | A | 263 | -16.349 | -3.803 | 2.096  | 1.00 | 16.93 | C   |
| ATOM | 2052 | CG  | TYR | A | 263 | -17.327 | -4.107 | 3.212  | 1.00 | 14.41 | C   |
| ATOM | 2053 | CD1 | TYR | A | 263 | -18.595 | -4.556 | 2.931  | 1.00 | 17.78 | C   |
| ATOM | 2054 | CD2 | TYR | A | 263 | -17.055 | -3.743 | 4.505  | 1.00 | 15.15 | C   |
| ATOM | 2055 | CE1 | TYR | A | 263 | -19.577 | -4.581 | 3.889  | 1.00 | 17.72 | C   |
| ATOM | 2056 | CE2 | TYR | A | 263 | -18.025 | -3.763 | 5.472  | 1.00 | 16.35 | C   |

|      |      |     |     |   |     |         |        |        |      |       |     |
|------|------|-----|-----|---|-----|---------|--------|--------|------|-------|-----|
| ATOM | 2057 | CZ  | TYR | A | 263 | -19.294 | -4.157 | 5.153  | 1.00 | 17.14 | C   |
| ATOM | 2058 | OH  | TYR | A | 263 | -20.326 | -3.914 | 6.025  | 1.00 | 18.82 | O   |
| ATOM | 2059 | N   | ILE | A | 264 | -16.205 | -1.275 | 3.488  | 1.00 | 13.60 | N   |
| ATOM | 2060 | CA  | ILE | A | 264 | -16.396 | -0.224 | 4.502  | 1.00 | 13.72 | C   |
| ATOM | 2061 | C   | ILE | A | 264 | -16.916 | 0.992  | 3.801  | 1.00 | 14.67 | C   |
| ATOM | 2062 | O   | ILE | A | 264 | -18.082 | 1.333  | 3.943  | 1.00 | 16.24 | O   |
| ATOM | 2063 | CB  | ILE | A | 264 | -15.058 | 0.192  | 5.230  | 1.00 | 11.33 | C   |
| ATOM | 2064 | CG1 | ILE | A | 264 | -14.910 | -0.527 | 6.568  | 1.00 | 9.86  | C   |
| ATOM | 2065 | CG2 | ILE | A | 264 | -15.057 | 1.676  | 5.551  | 1.00 | 12.03 | C   |
| ATOM | 2066 | CD1 | ILE | A | 264 | -13.924 | 0.134  | 7.518  | 1.00 | 8.24  | C   |
| ATOM | 2067 | N   | CYS | A | 265 | -16.146 | 1.431  | 2.817  | 1.00 | 18.20 | N   |
| ATOM | 2068 | CA  | CYS | A | 265 | -16.409 | 2.706  | 2.184  | 1.00 | 21.00 | C   |
| ATOM | 2069 | C   | CYS | A | 265 | -17.183 | 2.683  | 0.863  | 1.00 | 20.34 | C   |
| ATOM | 2070 | O   | CYS | A | 265 | -17.164 | 3.648  | 0.104  | 1.00 | 18.15 | O   |
| ATOM | 2071 | CB  | CYS | A | 265 | -15.131 | 3.508  | 2.016  | 1.00 | 18.44 | C   |
| ATOM | 2072 | SG  | CYS | A | 265 | -15.717 | 5.147  | 1.584  | 1.00 | 24.42 | S   |
| ATOM | 2073 | N   | GLU | A | 266 | -17.927 | 1.612  | 0.630  | 1.00 | 22.55 | N   |
| ATOM | 2074 | CA  | GLU | A | 266 | -19.044 | 1.668  | -0.305 | 1.00 | 25.71 | C   |
| ATOM | 2075 | C   | GLU | A | 266 | -20.359 | 1.649  | 0.507  | 1.00 | 25.99 | C   |
| ATOM | 2076 | O   | GLU | A | 266 | -21.401 | 2.132  | 0.031  | 1.00 | 24.57 | O   |
| ATOM | 2077 | CB  | GLU | A | 266 | -18.982 | 0.486  | -1.306 | 1.00 | 30.26 | C   |
| ATOM | 2078 | CG  | GLU | A | 266 | -18.126 | 0.746  | -2.589 | 1.00 | 33.40 | C   |
| ATOM | 2079 | CD  | GLU | A | 266 | -18.430 | -0.224 | -3.755 | 1.00 | 33.38 | C   |
| ATOM | 2080 | OE1 | GLU | A | 266 | -19.340 | 0.064  | -4.569 | 1.00 | 34.65 | O   |
| ATOM | 2081 | OE2 | GLU | A | 266 | -17.702 | -1.226 | -3.918 | 1.00 | 31.65 | O1- |
| ATOM | 2082 | N   | ASN | A | 267 | -20.231 | 1.304  | 1.792  | 1.00 | 24.11 | N   |
| ATOM | 2083 | CA  | ASN | A | 267 | -21.367 | 1.133  | 2.693  | 1.00 | 24.75 | C   |
| ATOM | 2084 | C   | ASN | A | 267 | -21.562 | 2.304  | 3.675  | 1.00 | 25.96 | C   |
| ATOM | 2085 | O   | ASN | A | 267 | -22.551 | 2.367  | 4.425  | 1.00 | 24.17 | O   |
| ATOM | 2086 | CB  | ASN | A | 267 | -21.201 | -0.171 | 3.465  | 1.00 | 25.26 | C   |
| ATOM | 2087 | CG  | ASN | A | 267 | -21.552 | -1.388 | 2.630  | 1.00 | 26.30 | C   |
| ATOM | 2088 | ND2 | ASN | A | 267 | -21.767 | -2.527 | 3.293  | 1.00 | 23.38 | N   |
| ATOM | 2089 | OD1 | ASN | A | 267 | -21.602 | -1.314 | 1.394  | 1.00 | 28.38 | O   |
| ATOM | 2090 | N   | GLN | A | 268 | -20.543 | 3.150  | 3.756  | 1.00 | 27.51 | N   |
| ATOM | 2091 | CA  | GLN | A | 268 | -20.619 | 4.455  | 4.422  | 1.00 | 26.43 | C   |
| ATOM | 2092 | C   | GLN | A | 268 | -21.731 | 4.680  | 5.469  | 1.00 | 25.52 | C   |
| ATOM | 2093 | O   | GLN | A | 268 | -21.432 | 5.026  | 6.604  | 1.00 | 23.74 | O   |
| ATOM | 2094 | CB  | GLN | A | 268 | -20.693 | 5.552  | 3.354  | 1.00 | 24.02 | C   |
| ATOM | 2095 | CG  | GLN | A | 268 | -19.418 | 6.340  | 3.149  | 1.00 | 20.44 | C   |
| ATOM | 2096 | CD  | GLN | A | 268 | -19.711 | 7.673  | 2.493  | 1.00 | 23.29 | C   |
| ATOM | 2097 | NE2 | GLN | A | 268 | -18.762 | 8.607  | 2.568  | 1.00 | 22.63 | N   |
| ATOM | 2098 | OE1 | GLN | A | 268 | -20.807 | 7.873  | 1.949  | 1.00 | 24.24 | O   |
| ATOM | 2099 | N   | ASP | A | 269 | -22.993 | 4.648  | 5.054  | 1.00 | 25.35 | N   |
| ATOM | 2100 | CA  | ASP | A | 269 | -24.064 | 5.203  | 5.882  | 1.00 | 26.24 | C   |
| ATOM | 2101 | C   | ASP | A | 269 | -24.667 | 4.170  | 6.833  | 1.00 | 28.27 | C   |
| ATOM | 2102 | O   | ASP | A | 269 | -25.243 | 4.533  | 7.873  | 1.00 | 29.26 | O   |
| ATOM | 2103 | CB  | ASP | A | 269 | -25.180 | 5.803  | 5.009  | 1.00 | 27.91 | C   |
| ATOM | 2104 | CG  | ASP | A | 269 | -25.889 | 4.753  | 4.153  | 1.00 | 29.64 | C   |
| ATOM | 2105 | OD1 | ASP | A | 269 | -25.178 | 3.900  | 3.565  | 1.00 | 30.12 | O   |
| ATOM | 2106 | OD2 | ASP | A | 269 | -27.151 | 4.754  | 4.103  | 1.00 | 29.00 | O1- |
| ATOM | 2107 | N   | SER | A | 270 | -24.536 | 2.886  | 6.501  | 1.00 | 27.48 | N   |
| ATOM | 2108 | CA  | SER | A | 270 | -24.993 | 1.847  | 7.413  | 1.00 | 26.75 | C   |
| ATOM | 2109 | C   | SER | A | 270 | -23.949 | 1.519  | 8.504  | 1.00 | 26.55 | C   |
| ATOM | 2110 | O   | SER | A | 270 | -24.139 | 0.582  | 9.286  | 1.00 | 26.34 | O   |
| ATOM | 2111 | CB  | SER | A | 270 | -25.359 | 0.589  | 6.623  | 1.00 | 28.19 | C   |
| ATOM | 2112 | OG  | SER | A | 270 | -24.224 | 0.037  | 5.957  | 1.00 | 30.87 | O   |
| ATOM | 2113 | N   | ILE | A | 271 | -22.895 | 2.329  | 8.614  | 1.00 | 25.27 | N   |
| ATOM | 2114 | CA  | ILE | A | 271 | -21.741 | 1.967  | 9.420  | 1.00 | 24.11 | C   |
| ATOM | 2115 | C   | ILE | A | 271 | -21.253 | 3.034  | 10.393 | 1.00 | 25.93 | C   |
| ATOM | 2116 | O   | ILE | A | 271 | -21.228 | 2.784  | 11.593 | 1.00 | 27.16 | O   |
| ATOM | 2117 | CB  | ILE | A | 271 | -20.578 | 1.539  | 8.535  | 1.00 | 25.05 | C   |
| ATOM | 2118 | CG1 | ILE | A | 271 | -20.832 | 0.113  | 8.013  | 1.00 | 27.97 | C   |
| ATOM | 2119 | CG2 | ILE | A | 271 | -19.278 | 1.600  | 9.305  | 1.00 | 24.66 | C   |
| ATOM | 2120 | CD1 | ILE | A | 271 | -19.661 | -0.523 | 7.232  | 1.00 | 23.58 | C   |
| ATOM | 2121 | N   | SER | A | 272 | -20.749 | 4.167  | 9.908  | 1.00 | 27.76 | N   |
| ATOM | 2122 | CA  | SER | A | 272 | -20.329 | 5.238  | 10.836 | 1.00 | 28.74 | C   |
| ATOM | 2123 | C   | SER | A | 272 | -20.165 | 6.631  | 10.227 | 1.00 | 27.74 | C   |
| ATOM | 2124 | O   | SER | A | 272 | -19.123 | 7.259  | 10.418 | 1.00 | 26.72 | O   |
| ATOM | 2125 | CB  | SER | A | 272 | -19.018 | 4.837  | 11.530 | 1.00 | 30.16 | C   |
| ATOM | 2126 | OG  | SER | A | 272 | -18.380 | 5.901  | 12.239 | 1.00 | 27.56 | O   |
| ATOM | 2127 | N   | SER | A | 273 | -21.257 | 7.182  | 9.701  | 1.00 | 27.40 | N   |



|      |      |     |     |   |     |         |        |        |      |       |     |
|------|------|-----|-----|---|-----|---------|--------|--------|------|-------|-----|
| ATOM | 2128 | CA  | SER | A | 273 | -21.236 | 8.458  | 8.970  | 1.00 | 26.73 | C   |
| ATOM | 2129 | C   | SER | A | 273 | -19.842 | 9.066  | 8.643  | 1.00 | 25.15 | C   |
| ATOM | 2130 | O   | SER | A | 273 | -19.475 | 9.204  | 7.468  | 1.00 | 20.82 | O   |
| ATOM | 2131 | CB  | SER | A | 273 | -22.110 | 9.495  | 9.714  | 1.00 | 25.04 | C   |
| ATOM | 2132 | OG  | SER | A | 273 | -21.417 | 10.725 | 9.872  | 1.00 | 24.31 | O   |
| ATOM | 2133 | N   | LYS | A | 274 | -19.104 | 9.433  | 9.697  | 1.00 | 24.05 | N   |
| ATOM | 2134 | CA  | LYS | A | 274 | -17.875 | 10.230 | 9.625  | 1.00 | 24.74 | C   |
| ATOM | 2135 | C   | LYS | A | 274 | -16.764 | 9.750  | 8.705  | 1.00 | 22.58 | C   |
| ATOM | 2136 | O   | LYS | A | 274 | -15.721 | 10.376 | 8.669  | 1.00 | 21.30 | O   |
| ATOM | 2137 | CB  | LYS | A | 274 | -17.260 | 10.431 | 11.024 | 1.00 | 25.80 | C   |
| ATOM | 2138 | CG  | LYS | A | 274 | -18.220 | 10.937 | 12.072 | 1.00 | 29.40 | C   |
| ATOM | 2139 | CD  | LYS | A | 274 | -18.241 | 12.437 | 12.131 | 1.00 | 33.71 | C   |
| ATOM | 2140 | CE  | LYS | A | 274 | -18.315 | 12.928 | 13.589 | 1.00 | 34.96 | C   |
| ATOM | 2141 | NZ  | LYS | A | 274 | -17.356 | 14.082 | 13.815 | 1.00 | 34.17 | N1+ |
| ATOM | 2142 | N   | LEU | A | 275 | -16.941 | 8.657  | 7.970  | 1.00 | 23.57 | N   |
| ATOM | 2143 | CA  | LEU | A | 275 | -15.937 | 8.325  | 6.959  | 1.00 | 23.18 | C   |
| ATOM | 2144 | C   | LEU | A | 275 | -16.330 | 8.834  | 5.585  | 1.00 | 22.54 | C   |
| ATOM | 2145 | O   | LEU | A | 275 | -16.224 | 8.104  | 4.610  | 1.00 | 21.30 | O   |
| ATOM | 2146 | CB  | LEU | A | 275 | -15.652 | 6.828  | 6.872  | 1.00 | 21.39 | C   |
| ATOM | 2147 | CG  | LEU | A | 275 | -16.319 | 5.772  | 7.741  | 1.00 | 23.35 | C   |
| ATOM | 2148 | CD1 | LEU | A | 275 | -17.580 | 5.221  | 7.072  | 1.00 | 23.95 | C   |
| ATOM | 2149 | CD2 | LEU | A | 275 | -15.319 | 4.663  | 7.986  | 1.00 | 22.41 | C   |
| ATOM | 2150 | N   | LYS | A | 276 | -16.828 | 10.073 | 5.514  | 1.00 | 25.95 | N   |
| ATOM | 2151 | CA  | LYS | A | 276 | -16.886 | 10.830 | 4.247  | 1.00 | 26.73 | C   |
| ATOM | 2152 | C   | LYS | A | 276 | -15.478 | 11.187 | 3.799  | 1.00 | 25.18 | C   |
| ATOM | 2153 | O   | LYS | A | 276 | -14.865 | 10.434 | 3.052  | 1.00 | 25.22 | O   |
| ATOM | 2154 | CB  | LYS | A | 276 | -17.710 | 12.129 | 4.402  | 1.00 | 29.83 | C   |
| ATOM | 2155 | CG  | LYS | A | 276 | -17.702 | 12.805 | 5.801  | 1.00 | 30.45 | C   |
| ATOM | 2156 | CD  | LYS | A | 276 | -16.755 | 14.005 | 5.874  | 1.00 | 30.09 | C   |
| ATOM | 2157 | CE  | LYS | A | 276 | -16.974 | 14.966 | 4.712  | 1.00 | 31.30 | C   |
| ATOM | 2158 | NZ  | LYS | A | 276 | -18.160 | 15.877 | 4.882  | 1.00 | 29.48 | N1+ |
| ATOM | 2159 | N   | GLU | A | 277 | -14.899 | 12.172 | 4.482  | 1.00 | 25.27 | N   |
| ATOM | 2160 | CA  | GLU | A | 277 | -13.552 | 12.674 | 4.211  | 1.00 | 26.60 | C   |
| ATOM | 2161 | C   | GLU | A | 277 | -12.640 | 11.674 | 3.545  | 1.00 | 25.74 | C   |
| ATOM | 2162 | O   | GLU | A | 277 | -12.369 | 11.752 | 2.348  | 1.00 | 25.45 | O   |
| ATOM | 2163 | CB  | GLU | A | 277 | -12.899 | 13.131 | 5.511  | 1.00 | 26.87 | C   |
| ATOM | 2164 | CG  | GLU | A | 277 | -13.175 | 14.597 | 5.841  | 1.00 | 31.72 | C   |
| ATOM | 2165 | CD  | GLU | A | 277 | -12.559 | 15.583 | 4.830  | 1.00 | 30.45 | C   |
| ATOM | 2166 | OE1 | GLU | A | 277 | -13.198 | 15.870 | 3.787  | 1.00 | 27.15 | O   |
| ATOM | 2167 | OE2 | GLU | A | 277 | -11.473 | 16.133 | 5.136  | 1.00 | 30.36 | O1- |
| ATOM | 2168 | N   | CYS | A | 278 | -12.396 | 10.601 | 4.270  | 1.00 | 26.80 | N   |
| ATOM | 2169 | CA  | CYS | A | 278 | -11.438 | 9.582  | 3.859  | 1.00 | 27.12 | C   |
| ATOM | 2170 | C   | CYS | A | 278 | -12.143 | 8.579  | 2.975  | 1.00 | 23.38 | C   |
| ATOM | 2171 | O   | CYS | A | 278 | -12.167 | 7.391  | 3.233  | 1.00 | 24.65 | O   |
| ATOM | 2172 | CB  | CYS | A | 278 | -10.871 | 8.920  | 5.104  | 1.00 | 31.72 | C   |
| ATOM | 2173 | SG  | CYS | A | 278 | -11.643 | 9.660  | 6.586  | 1.00 | 33.14 | S   |
| ATOM | 2174 | N   | CYS | A | 279 | -12.574 | 9.086  | 1.842  | 1.00 | 21.92 | N   |
| ATOM | 2175 | CA  | CYS | A | 279 | -13.315 | 8.339  | 0.856  | 1.00 | 20.79 | C   |
| ATOM | 2176 | C   | CYS | A | 279 | -13.460 | 9.359  | -0.255 | 1.00 | 21.27 | C   |
| ATOM | 2177 | O   | CYS | A | 279 | -13.962 | 9.073  | -1.350 | 1.00 | 22.78 | O   |
| ATOM | 2178 | CB  | CYS | A | 279 | -14.661 | 7.929  | 1.439  | 1.00 | 19.99 | C   |
| ATOM | 2179 | SG  | CYS | A | 279 | -14.510 | 6.478  | 2.522  | 1.00 | 21.12 | S   |
| ATOM | 2180 | N   | GLU | A | 280 | -13.143 | 10.594 | 0.107  | 1.00 | 18.93 | N   |
| ATOM | 2181 | CA  | GLU | A | 280 | -12.521 | 11.517 | -0.799 | 1.00 | 19.87 | C   |
| ATOM | 2182 | C   | GLU | A | 280 | -11.046 | 11.586 | -0.419 | 1.00 | 21.37 | C   |
| ATOM | 2183 | O   | GLU | A | 280 | -10.570 | 12.645 | -0.028 | 1.00 | 22.62 | O   |
| ATOM | 2184 | CB  | GLU | A | 280 | -13.152 | 12.896 | -0.661 | 1.00 | 19.56 | C   |
| ATOM | 2185 | CG  | GLU | A | 280 | -14.562 | 12.867 | -0.153 | 1.00 | 22.77 | C   |
| ATOM | 2186 | CD  | GLU | A | 280 | -15.551 | 12.438 | -1.207 | 1.00 | 24.09 | C   |
| ATOM | 2187 | OE1 | GLU | A | 280 | -15.638 | 11.225 | -1.511 | 1.00 | 22.38 | O   |
| ATOM | 2188 | OE2 | GLU | A | 280 | -16.260 | 13.325 | -1.723 | 1.00 | 26.29 | O1- |
| ATOM | 2189 | N   | LYS | A | 281 | -10.362 | 10.437 | -0.413 | 1.00 | 21.75 | N   |
| ATOM | 2190 | CA  | LYS | A | 281 | -8.896  | 10.399 | -0.281 | 1.00 | 22.31 | C   |
| ATOM | 2191 | C   | LYS | A | 281 | -8.246  | 9.170  | -0.941 | 1.00 | 23.66 | C   |
| ATOM | 2192 | O   | LYS | A | 281 | -8.367  | 8.041  | -0.431 | 1.00 | 25.63 | O   |
| ATOM | 2193 | CB  | LYS | A | 281 | -8.474  | 10.459 | 1.188  | 1.00 | 19.47 | C   |
| ATOM | 2194 | CG  | LYS | A | 281 | -8.113  | 11.852 | 1.682  | 1.00 | 21.76 | C   |
| ATOM | 2195 | CD  | LYS | A | 281 | -8.906  | 12.198 | 2.952  | 1.00 | 25.79 | C   |
| ATOM | 2196 | CE  | LYS | A | 281 | -8.282  | 13.351 | 3.761  | 1.00 | 27.84 | C   |
| ATOM | 2197 | NZ  | LYS | A | 281 | -7.158  | 12.950 | 4.670  | 1.00 | 23.24 | N1+ |
| ATOM | 2198 | N   | PRO | A | 282 | -7.451  | 9.396  | -2.015 | 1.00 | 20.78 | N   |

|      |      |     |     |   |     |         |        |        |      |       |     |
|------|------|-----|-----|---|-----|---------|--------|--------|------|-------|-----|
| ATOM | 2199 | CA  | PRO | A | 282 | -6.604  | 8.401  | -2.683 | 1.00 | 19.52 | C   |
| ATOM | 2200 | C   | PRO | A | 282 | -6.214  | 7.216  | -1.818 | 1.00 | 19.87 | C   |
| ATOM | 2201 | O   | PRO | A | 282 | -5.362  | 7.365  | -0.939 | 1.00 | 19.82 | O   |
| ATOM | 2202 | CB  | PRO | A | 282 | -5.376  | 9.210  | -3.100 | 1.00 | 16.20 | C   |
| ATOM | 2203 | CG  | PRO | A | 282 | -5.586  | 10.592 | -2.507 | 1.00 | 15.71 | C   |
| ATOM | 2204 | CD  | PRO | A | 282 | -7.052  | 10.740 | -2.438 | 1.00 | 17.15 | C   |
| ATOM | 2205 | N   | LEU | A | 283 | -6.642  | 6.027  | -2.254 | 1.00 | 20.57 | N   |
| ATOM | 2206 | CA  | LEU | A | 283 | -6.610  | 4.787  | -1.461 | 1.00 | 20.98 | C   |
| ATOM | 2207 | C   | LEU | A | 283 | -5.739  | 4.913  | -0.252 | 1.00 | 20.62 | C   |
| ATOM | 2208 | O   | LEU | A | 283 | -6.176  | 5.479  | 0.723  | 1.00 | 18.64 | O   |
| ATOM | 2209 | CB  | LEU | A | 283 | -6.147  | 3.585  | -2.288 | 1.00 | 22.23 | C   |
| ATOM | 2210 | CG  | LEU | A | 283 | -6.130  | 2.292  | -1.452 | 1.00 | 23.90 | C   |
| ATOM | 2211 | CD1 | LEU | A | 283 | -7.217  | 1.299  | -1.964 | 1.00 | 22.21 | C   |
| ATOM | 2212 | CD2 | LEU | A | 283 | -4.730  | 1.673  | -1.500 | 1.00 | 20.45 | C   |
| ATOM | 2213 | N   | LEU | A | 284 | -4.471  | 4.536  | -0.395 | 1.00 | 22.99 | N   |
| ATOM | 2214 | CA  | LEU | A | 284 | -3.396  | 4.918  | 0.519  | 1.00 | 26.73 | C   |
| ATOM | 2215 | C   | LEU | A | 284 | -3.912  | 5.607  | 1.803  | 1.00 | 28.33 | C   |
| ATOM | 2216 | O   | LEU | A | 284 | -4.326  | 4.906  | 2.739  | 1.00 | 28.88 | O   |
| ATOM | 2217 | CB  | LEU | A | 284 | -2.385  | 5.825  | -0.225 | 1.00 | 28.31 | C   |
| ATOM | 2218 | CG  | LEU | A | 284 | -1.765  | 5.434  | -1.595 | 1.00 | 26.94 | C   |
| ATOM | 2219 | CD1 | LEU | A | 284 | -1.303  | 6.690  | -2.364 | 1.00 | 20.85 | C   |
| ATOM | 2220 | CD2 | LEU | A | 284 | -0.594  | 4.469  | -1.384 | 1.00 | 26.30 | C   |
| ATOM | 2221 | N   | GLU | A | 285 | -4.223  | 6.906  | 1.683  | 1.00 | 28.79 | N   |
| ATOM | 2222 | CA  | GLU | A | 285 | -4.614  | 7.759  | 2.825  | 1.00 | 28.34 | C   |
| ATOM | 2223 | C   | GLU | A | 285 | -6.001  | 7.475  | 3.396  | 1.00 | 26.33 | C   |
| ATOM | 2224 | O   | GLU | A | 285 | -6.293  | 7.857  | 4.516  | 1.00 | 28.65 | O   |
| ATOM | 2225 | CB  | GLU | A | 285 | -4.542  | 9.247  | 2.462  | 1.00 | 28.57 | C   |
| ATOM | 2226 | CG  | GLU | A | 285 | -3.144  | 9.754  | 2.142  | 1.00 | 29.88 | C   |
| ATOM | 2227 | CD  | GLU | A | 285 | -3.105  | 10.581 | 0.870  | 1.00 | 30.17 | C   |
| ATOM | 2228 | OE1 | GLU | A | 285 | -3.483  | 11.778 | 0.920  | 1.00 | 29.25 | O   |
| ATOM | 2229 | OE2 | GLU | A | 285 | -2.744  | 10.009 | -0.185 | 1.00 | 28.46 | O1- |
| ATOM | 2230 | N   | LYS | A | 286 | -6.880  | 6.870  | 2.617  | 1.00 | 26.40 | N   |
| ATOM | 2231 | CA  | LYS | A | 286 | -8.030  | 6.193  | 3.204  | 1.00 | 26.58 | C   |
| ATOM | 2232 | C   | LYS | A | 286 | -7.525  | 5.430  | 4.440  | 1.00 | 24.48 | C   |
| ATOM | 2233 | O   | LYS | A | 286 | -7.732  | 5.868  | 5.567  | 1.00 | 25.77 | O   |
| ATOM | 2234 | CB  | LYS | A | 286 | -8.650  | 5.179  | 2.218  | 1.00 | 27.97 | C   |
| ATOM | 2235 | CG  | LYS | A | 286 | -9.914  | 5.578  | 1.425  | 1.00 | 19.93 | C   |
| ATOM | 2236 | CD  | LYS | A | 286 | -10.135 | 4.498  | 0.364  | 1.00 | 19.31 | C   |
| ATOM | 2237 | CE  | LYS | A | 286 | -11.548 | 4.386  | -0.099 | 1.00 | 16.08 | C   |
| ATOM | 2238 | NZ  | LYS | A | 286 | -12.013 | 5.632  | -0.734 | 1.00 | 16.67 | N1+ |
| ATOM | 2239 | N   | SER | A | 287 | -6.716  | 4.406  | 4.244  | 1.00 | 19.71 | N   |
| ATOM | 2240 | CA  | SER | A | 287 | -6.403  | 3.545  | 5.359  | 1.00 | 19.25 | C   |
| ATOM | 2241 | C   | SER | A | 287 | -5.478  | 4.164  | 6.423  | 1.00 | 19.83 | C   |
| ATOM | 2242 | O   | SER | A | 287 | -4.917  | 3.451  | 7.252  | 1.00 | 19.56 | O   |
| ATOM | 2243 | CB  | SER | A | 287 | -5.832  | 2.230  | 4.832  | 1.00 | 22.16 | C   |
| ATOM | 2244 | OG  | SER | A | 287 | -6.709  | 1.646  | 3.874  | 1.00 | 24.16 | O   |
| ATOM | 2245 | N   | HIS | A | 288 | -5.335  | 5.486  | 6.427  | 1.00 | 20.41 | N   |
| ATOM | 2246 | CA  | HIS | A | 288 | -4.825  | 6.194  | 7.611  | 1.00 | 23.21 | C   |
| ATOM | 2247 | C   | HIS | A | 288 | -5.564  | 7.515  | 7.785  | 1.00 | 24.49 | C   |
| ATOM | 2248 | O   | HIS | A | 288 | -4.955  | 8.582  | 7.929  | 1.00 | 24.42 | O   |
| ATOM | 2249 | CB  | HIS | A | 288 | -3.315  | 6.446  | 7.531  | 1.00 | 23.44 | C   |
| ATOM | 2250 | CG  | HIS | A | 288 | -2.712  | 6.985  | 8.800  | 1.00 | 24.13 | C   |
| ATOM | 2251 | CD2 | HIS | A | 288 | -2.834  | 8.190  | 9.411  | 1.00 | 22.19 | C   |
| ATOM | 2252 | ND1 | HIS | A | 288 | -1.809  | 6.267  | 9.556  | 1.00 | 25.67 | N   |
| ATOM | 2253 | CE1 | HIS | A | 288 | -1.401  | 7.001  | 10.576 | 1.00 | 23.98 | C   |
| ATOM | 2254 | NE2 | HIS | A | 288 | -2.009  | 8.172  | 10.512 | 1.00 | 26.26 | N   |
| ATOM | 2255 | N   | CYS | A | 289 | -6.865  | 7.447  | 7.540  | 1.00 | 25.16 | N   |
| ATOM | 2256 | CA  | CYS | A | 289 | -7.819  | 8.301  | 8.209  | 1.00 | 26.57 | C   |
| ATOM | 2257 | C   | CYS | A | 289 | -8.701  | 7.377  | 9.055  | 1.00 | 25.76 | C   |
| ATOM | 2258 | O   | CYS | A | 289 | -9.060  | 7.710  | 10.192 | 1.00 | 26.10 | O   |
| ATOM | 2259 | CB  | CYS | A | 289 | -8.716  | 9.020  | 7.218  | 1.00 | 26.87 | C   |
| ATOM | 2260 | SG  | CYS | A | 289 | -10.336 | 9.115  | 8.027  | 1.00 | 35.83 | S   |
| ATOM | 2261 | N   | ILE | A | 290 | -9.231  | 6.354  | 8.381  | 1.00 | 23.01 | N   |
| ATOM | 2262 | CA  | ILE | A | 290 | -9.982  | 5.262  | 8.996  | 1.00 | 20.80 | C   |
| ATOM | 2263 | C   | ILE | A | 290 | -9.125  | 4.551  | 10.043 | 1.00 | 21.11 | C   |
| ATOM | 2264 | O   | ILE | A | 290 | -9.551  | 4.335  | 11.168 | 1.00 | 22.48 | O   |
| ATOM | 2265 | CB  | ILE | A | 290 | -10.432 | 4.241  | 7.920  | 1.00 | 17.33 | C   |
| ATOM | 2266 | CG1 | ILE | A | 290 | -11.770 | 4.670  | 7.312  | 1.00 | 16.61 | C   |
| ATOM | 2267 | CG2 | ILE | A | 290 | -10.558 | 2.866  | 8.514  | 1.00 | 19.50 | C   |
| ATOM | 2268 | CD1 | ILE | A | 290 | -11.867 | 4.462  | 5.808  | 1.00 | 11.81 | C   |
| ATOM | 2269 | N   | ALA | A | 291 | -7.920  | 4.156  | 9.665  | 1.00 | 20.66 | N   |

|      |      |     |     |   |     |         |        |        |      |       |     |
|------|------|-----|-----|---|-----|---------|--------|--------|------|-------|-----|
| ATOM | 2270 | CA  | ALA | A | 291 | -6.948  | 3.747  | 10.664 | 1.00 | 20.97 | C   |
| ATOM | 2271 | C   | ALA | A | 291 | -6.893  | 4.911  | 11.619 | 1.00 | 19.91 | C   |
| ATOM | 2272 | O   | ALA | A | 291 | -7.270  | 6.008  | 11.249 | 1.00 | 18.39 | O   |
| ATOM | 2273 | CB  | ALA | A | 291 | -5.583  | 3.518  | 10.024 | 1.00 | 21.17 | C   |
| ATOM | 2274 | N   | GLU | A | 292 | -6.302  | 4.720  | 12.784 | 1.00 | 21.16 | N   |
| ATOM | 2275 | CA  | GLU | A | 292 | -6.572  | 5.631  | 13.881 | 1.00 | 24.55 | C   |
| ATOM | 2276 | C   | GLU | A | 292 | -6.249  | 7.130  | 13.695 | 1.00 | 26.59 | C   |
| ATOM | 2277 | O   | GLU | A | 292 | -5.185  | 7.622  | 14.100 | 1.00 | 27.80 | O   |
| ATOM | 2278 | CB  | GLU | A | 292 | -5.962  | 5.076  | 15.170 | 1.00 | 24.02 | C   |
| ATOM | 2279 | CG  | GLU | A | 292 | -6.808  | 3.952  | 15.736 | 1.00 | 23.17 | C   |
| ATOM | 2280 | CD  | GLU | A | 292 | -6.260  | 3.354  | 17.010 | 1.00 | 25.80 | C   |
| ATOM | 2281 | OE1 | GLU | A | 292 | -6.050  | 4.132  | 17.989 | 1.00 | 23.17 | O   |
| ATOM | 2282 | OE2 | GLU | A | 292 | -6.112  | 2.098  | 17.040 | 1.00 | 20.76 | O1- |
| ATOM | 2283 | N   | VAL | A | 293 | -7.121  | 7.800  | 12.940 | 1.00 | 26.75 | N   |
| ATOM | 2284 | CA  | VAL | A | 293 | -7.593  | 9.139  | 13.260 | 1.00 | 26.08 | C   |
| ATOM | 2285 | C   | VAL | A | 293 | -9.082  | 9.127  | 12.906 | 1.00 | 26.05 | C   |
| ATOM | 2286 | O   | VAL | A | 293 | -9.506  | 9.564  | 11.824 | 1.00 | 23.87 | O   |
| ATOM | 2287 | CB  | VAL | A | 293 | -6.824  | 10.236 | 12.489 | 1.00 | 26.52 | C   |
| ATOM | 2288 | CG1 | VAL | A | 293 | -7.586  | 11.572 | 12.540 | 1.00 | 23.04 | C   |
| ATOM | 2289 | CG2 | VAL | A | 293 | -5.434  | 10.417 | 13.116 | 1.00 | 25.28 | C   |
| ATOM | 2290 | N   | GLU | A | 294 | -9.845  | 8.465  | 13.774 | 1.00 | 26.28 | N   |
| ATOM | 2291 | CA  | GLU | A | 294 | -11.252 | 8.203  | 13.506 | 1.00 | 27.28 | C   |
| ATOM | 2292 | C   | GLU | A | 294 | -12.157 | 8.786  | 14.564 | 1.00 | 25.18 | C   |
| ATOM | 2293 | O   | GLU | A | 294 | -12.655 | 8.059  | 15.407 | 1.00 | 25.83 | O   |
| ATOM | 2294 | CB  | GLU | A | 294 | -11.509 | 6.688  | 13.403 | 1.00 | 29.38 | C   |
| ATOM | 2295 | CG  | GLU | A | 294 | -11.930 | 6.202  | 12.013 | 1.00 | 27.11 | C   |
| ATOM | 2296 | CD  | GLU | A | 294 | -12.826 | 7.200  | 11.307 | 1.00 | 28.00 | C   |
| ATOM | 2297 | OE1 | GLU | A | 294 | -12.301 | 8.229  | 10.798 | 1.00 | 24.31 | O   |
| ATOM | 2298 | OE2 | GLU | A | 294 | -14.056 | 6.961  | 11.289 | 1.00 | 26.88 | O1- |
| ATOM | 2299 | N   | ASN | A | 295 | -12.381 | 10.093 | 14.525 | 1.00 | 23.72 | N   |
| ATOM | 2300 | CA  | ASN | A | 295 | -13.248 | 10.720 | 15.510 | 1.00 | 21.83 | C   |
| ATOM | 2301 | C   | ASN | A | 295 | -14.523 | 9.893  | 15.424 | 1.00 | 18.95 | C   |
| ATOM | 2302 | O   | ASN | A | 295 | -14.920 | 9.519  | 14.325 | 1.00 | 16.49 | O   |
| ATOM | 2303 | CB  | ASN | A | 295 | -13.476 | 12.217 | 15.175 | 1.00 | 23.98 | C   |
| ATOM | 2304 | CG  | ASN | A | 295 | -13.935 | 13.068 | 16.404 | 1.00 | 27.75 | C   |
| ATOM | 2305 | ND2 | ASN | A | 295 | -13.404 | 12.768 | 17.605 | 1.00 | 26.54 | N   |
| ATOM | 2306 | OD1 | ASN | A | 295 | -14.706 | 14.027 | 16.242 | 1.00 | 27.01 | O   |
| ATOM | 2307 | N   | ASP | A | 296 | -14.757 | 9.198  | 16.536 | 1.00 | 19.63 | N   |
| ATOM | 2308 | CA  | ASP | A | 296 | -15.900 | 8.306  | 16.708 | 1.00 | 18.42 | C   |
| ATOM | 2309 | C   | ASP | A | 296 | -17.117 | 9.146  | 16.474 | 1.00 | 18.35 | C   |
| ATOM | 2310 | O   | ASP | A | 296 | -17.158 | 10.280 | 16.940 | 1.00 | 19.40 | O   |
| ATOM | 2311 | CB  | ASP | A | 296 | -16.006 | 7.790  | 18.155 | 1.00 | 17.52 | C   |
| ATOM | 2312 | CG  | ASP | A | 296 | -14.676 | 7.708  | 18.867 | 1.00 | 16.66 | C   |
| ATOM | 2313 | OD1 | ASP | A | 296 | -14.270 | 8.699  | 19.506 | 1.00 | 16.57 | O   |
| ATOM | 2314 | OD2 | ASP | A | 296 | -14.096 | 6.609  | 18.887 | 1.00 | 17.73 | O1- |
| ATOM | 2315 | N   | GLU | A | 297 | -18.180 | 8.541  | 15.963 | 1.00 | 20.63 | N   |
| ATOM | 2316 | CA  | GLU | A | 297 | -19.492 | 9.152  | 16.137 | 1.00 | 22.06 | C   |
| ATOM | 2317 | C   | GLU | A | 297 | -20.176 | 8.612  | 17.385 | 1.00 | 20.95 | C   |
| ATOM | 2318 | O   | GLU | A | 297 | -21.015 | 7.728  | 17.316 | 1.00 | 17.62 | O   |
| ATOM | 2319 | CB  | GLU | A | 297 | -20.393 | 8.974  | 14.910 | 1.00 | 22.28 | C   |
| ATOM | 2320 | CG  | GLU | A | 297 | -21.083 | 10.290 | 14.487 | 1.00 | 19.78 | C   |
| ATOM | 2321 | CD  | GLU | A | 297 | -22.552 | 10.114 | 14.097 | 1.00 | 17.46 | C   |
| ATOM | 2322 | OE1 | GLU | A | 297 | -23.107 | 9.029  | 14.331 | 1.00 | 18.89 | O   |
| ATOM | 2323 | OE2 | GLU | A | 297 | -23.177 | 11.082 | 13.618 | 1.00 | 17.10 | O1- |
| ATOM | 2324 | N   | MET | A | 298 | -19.640 | 9.016  | 18.530 | 1.00 | 21.96 | N   |
| ATOM | 2325 | CA  | MET | A | 298 | -20.458 | 9.312  | 19.694 | 1.00 | 23.40 | C   |
| ATOM | 2326 | C   | MET | A | 298 | -21.712 | 10.057 | 19.184 | 1.00 | 25.29 | C   |
| ATOM | 2327 | O   | MET | A | 298 | -21.650 | 10.760 | 18.154 | 1.00 | 23.28 | O   |
| ATOM | 2328 | CB  | MET | A | 298 | -19.659 | 10.192 | 20.679 | 1.00 | 23.66 | C   |
| ATOM | 2329 | CG  | MET | A | 298 | -19.890 | 11.713 | 20.580 | 1.00 | 23.57 | C   |
| ATOM | 2330 | SD  | MET | A | 298 | -21.327 | 12.337 | 21.577 | 1.00 | 29.35 | S   |
| ATOM | 2331 | CE  | MET | A | 298 | -20.736 | 14.067 | 22.065 | 1.00 | 21.21 | C   |
| ATOM | 2332 | N   | PRO | A | 299 | -22.855 | 9.926  | 19.902 | 1.00 | 25.70 | N   |
| ATOM | 2333 | CA  | PRO | A | 299 | -22.933 | 9.341  | 21.242 | 1.00 | 23.52 | C   |
| ATOM | 2334 | C   | PRO | A | 299 | -23.444 | 7.894  | 21.195 | 1.00 | 22.57 | C   |
| ATOM | 2335 | O   | PRO | A | 299 | -22.991 | 7.044  | 21.985 | 1.00 | 18.81 | O   |
| ATOM | 2336 | CB  | PRO | A | 299 | -23.889 | 10.297 | 21.982 | 1.00 | 24.67 | C   |
| ATOM | 2337 | CG  | PRO | A | 299 | -24.523 | 11.190 | 20.892 | 1.00 | 23.48 | C   |
| ATOM | 2338 | CD  | PRO | A | 299 | -24.126 | 10.590 | 19.566 | 1.00 | 26.37 | C   |
| ATOM | 2339 | N   | ALA | A | 300 | -24.449 | 7.663  | 20.336 | 1.00 | 23.45 | N   |
| ATOM | 2340 | CA  | ALA | A | 300 | -24.730 | 6.330  | 19.769 | 1.00 | 24.55 | C   |

|      |      |     |     |   |     |         |        |        |      |       |     |
|------|------|-----|-----|---|-----|---------|--------|--------|------|-------|-----|
| ATOM | 2341 | C   | ALA | A | 300 | -26.034 | 6.174  | 18.960 | 1.00 | 23.16 | C   |
| ATOM | 2342 | O   | ALA | A | 300 | -26.739 | 7.152  | 18.691 | 1.00 | 21.49 | O   |
| ATOM | 2343 | CB  | ALA | A | 300 | -24.655 | 5.248  | 20.867 | 1.00 | 26.49 | C   |
| ATOM | 2344 | N   | ASP | A | 301 | -26.398 | 4.908  | 18.733 | 1.00 | 24.12 | N   |
| ATOM | 2345 | CA  | ASP | A | 301 | -27.360 | 4.437  | 17.718 | 1.00 | 25.32 | C   |
| ATOM | 2346 | C   | ASP | A | 301 | -28.711 | 5.075  | 17.818 | 1.00 | 26.66 | C   |
| ATOM | 2347 | O   | ASP | A | 301 | -29.504 | 4.991  | 16.890 | 1.00 | 27.53 | O   |
| ATOM | 2348 | CB  | ASP | A | 301 | -27.548 | 2.919  | 17.890 | 1.00 | 26.16 | C   |
| ATOM | 2349 | CG  | ASP | A | 301 | -28.362 | 2.254  | 16.767 | 1.00 | 27.64 | C   |
| ATOM | 2350 | OD1 | ASP | A | 301 | -28.582 | 2.850  | 15.681 | 1.00 | 27.63 | O   |
| ATOM | 2351 | OD2 | ASP | A | 301 | -28.674 | 1.051  | 16.947 | 1.00 | 26.67 | O1- |
| ATOM | 2352 | N   | LEU | A | 302 | -28.958 | 5.727  | 18.946 | 1.00 | 30.35 | N   |
| ATOM | 2353 | CA  | LEU | A | 302 | -30.086 | 5.351  | 19.792 | 1.00 | 31.56 | C   |
| ATOM | 2354 | C   | LEU | A | 302 | -30.537 | 6.488  | 20.686 | 1.00 | 33.72 | C   |
| ATOM | 2355 | O   | LEU | A | 302 | -29.798 | 7.474  | 20.867 | 1.00 | 34.95 | O   |
| ATOM | 2356 | CB  | LEU | A | 302 | -29.647 | 4.182  | 20.653 | 1.00 | 28.92 | C   |
| ATOM | 2357 | CG  | LEU | A | 302 | -28.155 | 4.371  | 20.967 | 1.00 | 31.25 | C   |
| ATOM | 2358 | CD1 | LEU | A | 302 | -27.961 | 5.472  | 22.020 | 1.00 | 31.44 | C   |
| ATOM | 2359 | CD2 | LEU | A | 302 | -27.489 | 3.041  | 21.378 | 1.00 | 32.08 | C   |
| ATOM | 2360 | N   | PRO | A | 303 | -31.584 | 6.224  | 21.488 | 1.00 | 35.90 | N   |
| ATOM | 2361 | CA  | PRO | A | 303 | -31.430 | 6.284  | 22.954 | 1.00 | 38.93 | C   |
| ATOM | 2362 | C   | PRO | A | 303 | -30.874 | 4.971  | 23.513 | 1.00 | 38.86 | C   |
| ATOM | 2363 | O   | PRO | A | 303 | -29.892 | 4.975  | 24.269 | 1.00 | 38.96 | O   |
| ATOM | 2364 | CB  | PRO | A | 303 | -32.853 | 6.564  | 23.459 | 1.00 | 38.70 | C   |
| ATOM | 2365 | CG  | PRO | A | 303 | -33.766 | 6.592  | 22.142 | 1.00 | 38.82 | C   |
| ATOM | 2366 | CD  | PRO | A | 303 | -32.961 | 5.875  | 21.101 | 1.00 | 36.51 | C   |
| ATOM | 2367 | N   | SER | A | 304 | -31.360 | 3.855  | 22.964 | 1.00 | 37.24 | N   |
| ATOM | 2368 | CA  | SER | A | 304 | -31.097 | 2.522  | 23.528 | 1.00 | 35.92 | C   |
| ATOM | 2369 | C   | SER | A | 304 | -31.120 | 2.445  | 25.034 | 1.00 | 32.14 | C   |
| ATOM | 2370 | O   | SER | A | 304 | -30.681 | 1.441  | 25.597 | 1.00 | 30.33 | O   |
| ATOM | 2371 | CB  | SER | A | 304 | -29.774 | 1.948  | 23.042 | 1.00 | 36.77 | C   |
| ATOM | 2372 | OG  | SER | A | 304 | -30.029 | 0.971  | 22.042 | 1.00 | 42.09 | O   |
| ATOM | 2373 | N   | LEU | A | 305 | -31.942 | 3.312  | 25.607 | 1.00 | 30.13 | N   |
| ATOM | 2374 | CA  | LEU | A | 305 | -32.018 | 3.481  | 27.031 | 1.00 | 30.37 | C   |
| ATOM | 2375 | C   | LEU | A | 305 | -30.913 | 2.663  | 27.730 | 1.00 | 31.82 | C   |
| ATOM | 2376 | O   | LEU | A | 305 | -29.749 | 3.000  | 27.555 | 1.00 | 35.56 | O   |
| ATOM | 2377 | CB  | LEU | A | 305 | -33.405 | 3.084  | 27.532 | 1.00 | 29.63 | C   |
| ATOM | 2378 | CG  | LEU | A | 305 | -34.657 | 3.305  | 26.681 | 1.00 | 28.08 | C   |
| ATOM | 2379 | CD1 | LEU | A | 305 | -35.835 | 3.366  | 27.647 | 1.00 | 28.23 | C   |
| ATOM | 2380 | CD2 | LEU | A | 305 | -34.583 | 4.576  | 25.848 | 1.00 | 26.17 | C   |
| ATOM | 2381 | N   | ALA | A | 306 | -31.218 | 1.418  | 28.097 | 1.00 | 28.81 | N   |
| ATOM | 2382 | CA  | ALA | A | 306 | -30.480 | 0.759  | 29.160 | 1.00 | 25.85 | C   |
| ATOM | 2383 | C   | ALA | A | 306 | -30.048 | -0.635 | 28.744 | 1.00 | 24.00 | C   |
| ATOM | 2384 | O   | ALA | A | 306 | -30.699 | -1.241 | 27.912 | 1.00 | 23.85 | O   |
| ATOM | 2385 | CB  | ALA | A | 306 | -31.353 | 0.688  | 30.406 | 1.00 | 28.20 | C   |
| ATOM | 2386 | N   | ALA | A | 307 | -29.050 | -1.198 | 29.422 | 1.00 | 22.64 | N   |
| ATOM | 2387 | CA  | ALA | A | 307 | -28.519 | -2.505 | 29.043 | 1.00 | 24.62 | C   |
| ATOM | 2388 | C   | ALA | A | 307 | -28.896 | -3.578 | 30.063 | 1.00 | 25.94 | C   |
| ATOM | 2389 | O   | ALA | A | 307 | -28.053 | -4.112 | 30.807 | 1.00 | 22.41 | O   |
| ATOM | 2390 | CB  | ALA | A | 307 | -26.990 | -2.432 | 28.860 | 1.00 | 26.11 | C   |
| ATOM | 2391 | N   | ASP | A | 308 | -30.187 | -3.895 | 30.092 | 1.00 | 28.91 | N   |
| ATOM | 2392 | CA  | ASP | A | 308 | -30.732 | -4.831 | 31.078 | 1.00 | 27.05 | C   |
| ATOM | 2393 | C   | ASP | A | 308 | -31.350 | -6.031 | 30.350 | 1.00 | 26.11 | C   |
| ATOM | 2394 | O   | ASP | A | 308 | -32.535 | -6.372 | 30.516 | 1.00 | 24.92 | O   |
| ATOM | 2395 | CB  | ASP | A | 308 | -31.721 | -4.099 | 32.001 | 1.00 | 25.32 | C   |
| ATOM | 2396 | CG  | ASP | A | 308 | -31.006 | -3.359 | 33.154 | 1.00 | 25.24 | C   |
| ATOM | 2397 | OD1 | ASP | A | 308 | -29.958 | -3.840 | 33.629 | 1.00 | 19.08 | O   |
| ATOM | 2398 | OD2 | ASP | A | 308 | -31.452 | -2.267 | 33.552 | 1.00 | 27.30 | O1- |
| ATOM | 2399 | N   | PHE | A | 309 | -30.575 | -6.493 | 29.370 | 1.00 | 21.83 | N   |
| ATOM | 2400 | CA  | PHE | A | 309 | -30.779 | -7.762 | 28.711 | 1.00 | 18.30 | C   |
| ATOM | 2401 | C   | PHE | A | 309 | -29.716 | -8.657 | 29.238 | 1.00 | 15.33 | C   |
| ATOM | 2402 | O   | PHE | A | 309 | -29.757 | -9.841 | 29.018 | 1.00 | 18.02 | O   |
| ATOM | 2403 | CB  | PHE | A | 309 | -30.554 | -7.614 | 27.217 | 1.00 | 21.96 | C   |
| ATOM | 2404 | CG  | PHE | A | 309 | -31.727 | -8.017 | 26.378 | 1.00 | 22.43 | C   |
| ATOM | 2405 | CD1 | PHE | A | 309 | -33.007 | -8.013 | 26.902 | 1.00 | 21.17 | C   |
| ATOM | 2406 | CD2 | PHE | A | 309 | -31.532 | -8.450 | 25.084 | 1.00 | 21.60 | C   |
| ATOM | 2407 | CE1 | PHE | A | 309 | -34.060 | -8.440 | 26.163 | 1.00 | 22.58 | C   |
| ATOM | 2408 | CE2 | PHE | A | 309 | -32.577 | -8.876 | 24.337 | 1.00 | 24.09 | C   |
| ATOM | 2409 | CZ  | PHE | A | 309 | -33.851 | -8.876 | 24.874 | 1.00 | 26.92 | C   |
| ATOM | 2410 | N   | VAL | A | 310 | -28.619 | -8.040 | 29.631 | 1.00 | 17.52 | N   |
| ATOM | 2411 | CA  | VAL | A | 310 | -27.491 | -8.754 | 30.234 | 1.00 | 21.16 | C   |

|      |      |     |     |   |     |         |         |        |      |       |     |
|------|------|-----|-----|---|-----|---------|---------|--------|------|-------|-----|
| ATOM | 2412 | C   | VAL | A | 310 | -27.676 | -8.866  | 31.760 | 1.00 | 22.19 | C   |
| ATOM | 2413 | O   | VAL | A | 310 | -26.735 | -9.228  | 32.476 | 1.00 | 19.99 | O   |
| ATOM | 2414 | CB  | VAL | A | 310 | -26.093 | -8.031  | 29.910 | 1.00 | 22.76 | C   |
| ATOM | 2415 | CG1 | VAL | A | 310 | -26.078 | -7.481  | 28.455 | 1.00 | 16.58 | C   |
| ATOM | 2416 | CG2 | VAL | A | 310 | -25.796 | -6.903  | 30.929 | 1.00 | 19.12 | C   |
| ATOM | 2417 | N   | GLU | A | 311 | -28.904 | -8.615  | 32.231 | 1.00 | 24.86 | N   |
| ATOM | 2418 | CA  | GLU | A | 311 | -29.132 | -8.190  | 33.620 | 1.00 | 25.85 | C   |
| ATOM | 2419 | C   | GLU | A | 311 | -30.462 | -8.620  | 34.250 | 1.00 | 26.80 | C   |
| ATOM | 2420 | O   | GLU | A | 311 | -30.617 | -9.786  | 34.614 | 1.00 | 26.88 | O   |
| ATOM | 2421 | CB  | GLU | A | 311 | -28.997 | -6.672  | 33.724 | 1.00 | 24.55 | C   |
| ATOM | 2422 | CG  | GLU | A | 311 | -28.150 | -6.231  | 34.893 | 1.00 | 24.81 | C   |
| ATOM | 2423 | CD  | GLU | A | 311 | -28.390 | -7.071  | 36.097 | 1.00 | 22.49 | C   |
| ATOM | 2424 | OE1 | GLU | A | 311 | -29.486 | -6.952  | 36.659 | 1.00 | 27.72 | O   |
| ATOM | 2425 | OE2 | GLU | A | 311 | -27.551 | -7.932  | 36.415 | 1.00 | 21.47 | O1- |
| ATOM | 2426 | N   | SER | A | 312 | -31.340 | -7.646  | 34.518 | 1.00 | 27.11 | N   |
| ATOM | 2427 | CA  | SER | A | 312 | -32.668 | -7.899  | 35.086 | 1.00 | 28.09 | C   |
| ATOM | 2428 | C   | SER | A | 312 | -33.508 | -8.811  | 34.212 | 1.00 | 29.00 | C   |
| ATOM | 2429 | O   | SER | A | 312 | -34.603 | -8.413  | 33.813 | 1.00 | 32.24 | O   |
| ATOM | 2430 | CB  | SER | A | 312 | -33.463 | -6.594  | 35.244 | 1.00 | 25.60 | C   |
| ATOM | 2431 | OG  | SER | A | 312 | -32.912 | -5.751  | 36.227 | 1.00 | 29.41 | O   |
| ATOM | 2432 | N   | LYS | A | 313 | -33.071 | -10.047 | 34.005 | 1.00 | 27.40 | N   |
| ATOM | 2433 | CA  | LYS | A | 313 | -33.782 | -10.965 | 33.129 | 1.00 | 27.14 | C   |
| ATOM | 2434 | C   | LYS | A | 313 | -33.672 | -12.368 | 33.711 | 1.00 | 30.75 | C   |
| ATOM | 2435 | O   | LYS | A | 313 | -33.007 | -12.566 | 34.740 | 1.00 | 31.32 | O   |
| ATOM | 2436 | CB  | LYS | A | 313 | -33.153 | -10.936 | 31.738 | 1.00 | 21.94 | C   |
| ATOM | 2437 | CG  | LYS | A | 313 | -33.859 | -11.786 | 30.716 | 1.00 | 17.30 | C   |
| ATOM | 2438 | CD  | LYS | A | 313 | -34.578 | -10.916 | 29.723 | 1.00 | 15.90 | C   |
| ATOM | 2439 | CE  | LYS | A | 313 | -34.503 | -11.512 | 28.346 | 1.00 | 12.19 | C   |
| ATOM | 2440 | NZ  | LYS | A | 313 | -33.124 | -11.478 | 27.875 | 1.00 | 14.13 | N1+ |
| ATOM | 2441 | N   | ASP | A | 314 | -34.367 | -13.332 | 33.102 | 1.00 | 33.04 | N   |
| ATOM | 2442 | CA  | ASP | A | 314 | -33.947 | -14.726 | 33.210 | 1.00 | 34.53 | C   |
| ATOM | 2443 | C   | ASP | A | 314 | -33.696 | -15.303 | 31.820 | 1.00 | 34.78 | C   |
| ATOM | 2444 | O   | ASP | A | 314 | -34.638 | -15.649 | 31.091 | 1.00 | 34.31 | O   |
| ATOM | 2445 | CB  | ASP | A | 314 | -34.962 | -15.587 | 33.974 | 1.00 | 34.53 | C   |
| ATOM | 2446 | CG  | ASP | A | 314 | -34.538 | -17.065 | 34.066 | 1.00 | 36.92 | C   |
| ATOM | 2447 | OD1 | ASP | A | 314 | -33.379 | -17.438 | 33.692 | 1.00 | 33.31 | O   |
| ATOM | 2448 | OD2 | ASP | A | 314 | -35.415 | -17.878 | 34.458 | 1.00 | 41.34 | O1- |
| ATOM | 2449 | N   | VAL | A | 315 | -32.463 | -15.055 | 31.384 | 1.00 | 33.55 | N   |
| ATOM | 2450 | CA  | VAL | A | 315 | -31.752 | -15.855 | 30.402 | 1.00 | 30.37 | C   |
| ATOM | 2451 | C   | VAL | A | 315 | -30.272 | -15.815 | 30.829 | 1.00 | 28.87 | C   |
| ATOM | 2452 | O   | VAL | A | 315 | -29.493 | -14.952 | 30.414 | 1.00 | 25.57 | O   |
| ATOM | 2453 | CB  | VAL | A | 315 | -31.929 | -15.287 | 28.979 | 1.00 | 32.83 | C   |
| ATOM | 2454 | CG1 | VAL | A | 315 | -33.417 | -15.436 | 28.512 | 1.00 | 29.71 | C   |
| ATOM | 2455 | CG2 | VAL | A | 315 | -31.453 | -13.820 | 28.934 | 1.00 | 33.25 | C   |
| ATOM | 2456 | N   | CYS | A | 316 | -30.032 | -16.517 | 31.931 | 1.00 | 29.88 | N   |
| ATOM | 2457 | CA  | CYS | A | 316 | -28.683 | -16.794 | 32.423 | 1.00 | 27.73 | C   |
| ATOM | 2458 | C   | CYS | A | 316 | -27.953 | -17.584 | 31.361 | 1.00 | 26.33 | C   |
| ATOM | 2459 | O   | CYS | A | 316 | -27.153 | -17.013 | 30.620 | 1.00 | 26.76 | O   |
| ATOM | 2460 | CB  | CYS | A | 316 | -28.734 | -17.628 | 33.688 | 1.00 | 27.85 | C   |
| ATOM | 2461 | SG  | CYS | A | 316 | -27.077 | -18.069 | 34.276 | 1.00 | 31.37 | S   |
| ATOM | 2462 | N   | LYS | A | 317 | -28.313 | -18.863 | 31.217 | 1.00 | 22.54 | N   |
| ATOM | 2463 | CA  | LYS | A | 317 | -27.900 | -19.631 | 30.046 | 1.00 | 21.29 | C   |
| ATOM | 2464 | C   | LYS | A | 317 | -28.905 | -19.504 | 28.912 | 1.00 | 22.46 | C   |
| ATOM | 2465 | O   | LYS | A | 317 | -28.510 | -19.220 | 27.790 | 1.00 | 22.63 | O   |
| ATOM | 2466 | CB  | LYS | A | 317 | -27.693 | -21.120 | 30.369 | 1.00 | 18.85 | C   |
| ATOM | 2467 | CG  | LYS | A | 317 | -26.247 | -21.541 | 30.640 | 1.00 | 18.02 | C   |
| ATOM | 2468 | CD  | LYS | A | 317 | -26.179 | -22.731 | 31.604 | 1.00 | 20.06 | C   |
| ATOM | 2469 | CE  | LYS | A | 317 | -24.770 | -22.943 | 32.219 | 1.00 | 22.33 | C   |
| ATOM | 2470 | NZ  | LYS | A | 317 | -24.375 | -24.401 | 32.437 | 1.00 | 22.00 | N1+ |
| ATOM | 2471 | N   | ASN | A | 318 | -30.201 | -19.646 | 29.199 | 1.00 | 22.97 | N   |
| ATOM | 2472 | CA  | ASN | A | 318 | -31.215 | -19.864 | 28.143 | 1.00 | 22.32 | C   |
| ATOM | 2473 | C   | ASN | A | 318 | -30.963 | -19.181 | 26.798 | 1.00 | 24.26 | C   |
| ATOM | 2474 | O   | ASN | A | 318 | -31.447 | -19.657 | 25.759 | 1.00 | 26.24 | O   |
| ATOM | 2475 | CB  | ASN | A | 318 | -32.607 | -19.439 | 28.601 | 1.00 | 19.64 | C   |
| ATOM | 2476 | CG  | ASN | A | 318 | -33.659 | -19.693 | 27.542 | 1.00 | 17.20 | C   |
| ATOM | 2477 | ND2 | ASN | A | 318 | -33.852 | -18.753 | 26.630 | 1.00 | 17.37 | N   |
| ATOM | 2478 | OD1 | ASN | A | 318 | -34.234 | -20.753 | 27.507 | 1.00 | 19.89 | O   |
| ATOM | 2479 | N   | TYR | A | 319 | -30.390 | -17.978 | 26.856 | 1.00 | 23.97 | N   |
| ATOM | 2480 | CA  | TYR | A | 319 | -30.222 | -17.095 | 25.694 | 1.00 | 24.24 | C   |
| ATOM | 2481 | C   | TYR | A | 319 | -28.722 | -16.854 | 25.621 | 1.00 | 23.49 | C   |
| ATOM | 2482 | O   | TYR | A | 319 | -28.250 | -15.857 | 25.088 | 1.00 | 22.66 | O   |

|      |      |     |     |   |     |         |         |        |      |       |     |
|------|------|-----|-----|---|-----|---------|---------|--------|------|-------|-----|
| ATOM | 2483 | CB  | TYR | A | 319 | -31.022 | -15.804 | 25.948 | 1.00 | 23.01 | C   |
| ATOM | 2484 | CG  | TYR | A | 319 | -30.749 | -14.587 | 25.094 | 1.00 | 22.30 | C   |
| ATOM | 2485 | CD1 | TYR | A | 319 | -31.440 | -14.393 | 23.908 | 1.00 | 24.18 | C   |
| ATOM | 2486 | CD2 | TYR | A | 319 | -30.040 | -13.502 | 25.616 | 1.00 | 20.42 | C   |
| ATOM | 2487 | CE1 | TYR | A | 319 | -31.453 | -13.148 | 23.278 | 1.00 | 23.68 | C   |
| ATOM | 2488 | CE2 | TYR | A | 319 | -30.044 | -12.265 | 24.993 | 1.00 | 17.71 | C   |
| ATOM | 2489 | CZ  | TYR | A | 319 | -30.751 | -12.097 | 23.826 | 1.00 | 20.42 | C   |
| ATOM | 2490 | OH  | TYR | A | 319 | -30.732 | -10.898 | 23.159 | 1.00 | 22.03 | O   |
| ATOM | 2491 | N   | ALA | A | 320 | -27.993 | -17.889 | 25.995 | 1.00 | 21.15 | N   |
| ATOM | 2492 | CA  | ALA | A | 320 | -26.572 | -17.798 | 26.227 | 1.00 | 23.56 | C   |
| ATOM | 2493 | C   | ALA | A | 320 | -26.032 | -19.198 | 26.089 | 1.00 | 25.78 | C   |
| ATOM | 2494 | O   | ALA | A | 320 | -25.428 | -19.751 | 27.004 | 1.00 | 25.36 | O   |
| ATOM | 2495 | CB  | ALA | A | 320 | -26.290 | -17.267 | 27.618 | 1.00 | 24.04 | C   |
| ATOM | 2496 | N   | GLU | A | 321 | -26.398 | -19.828 | 24.985 | 1.00 | 28.84 | N   |
| ATOM | 2497 | CA  | GLU | A | 321 | -25.690 | -21.008 | 24.536 | 1.00 | 27.99 | C   |
| ATOM | 2498 | C   | GLU | A | 321 | -24.907 | -20.746 | 23.257 | 1.00 | 25.24 | C   |
| ATOM | 2499 | O   | GLU | A | 321 | -24.235 | -21.634 | 22.715 | 1.00 | 27.19 | O   |
| ATOM | 2500 | CB  | GLU | A | 321 | -26.658 | -22.167 | 24.388 | 1.00 | 30.20 | C   |
| ATOM | 2501 | CG  | GLU | A | 321 | -26.266 | -23.326 | 25.298 | 1.00 | 37.63 | C   |
| ATOM | 2502 | CD  | GLU | A | 321 | -25.831 | -22.921 | 26.736 | 1.00 | 38.24 | C   |
| ATOM | 2503 | OE1 | GLU | A | 321 | -24.725 | -22.329 | 26.915 | 1.00 | 36.30 | O   |
| ATOM | 2504 | OE2 | GLU | A | 321 | -26.509 | -23.388 | 27.699 | 1.00 | 40.13 | O1- |
| ATOM | 2505 | N   | ALA | A | 322 | -24.889 | -19.483 | 22.857 | 1.00 | 20.08 | N   |
| ATOM | 2506 | CA  | ALA | A | 322 | -23.864 | -19.005 | 21.965 | 1.00 | 17.91 | C   |
| ATOM | 2507 | C   | ALA | A | 322 | -22.817 | -18.388 | 22.879 | 1.00 | 16.32 | C   |
| ATOM | 2508 | O   | ALA | A | 322 | -23.051 | -17.332 | 23.441 | 1.00 | 17.37 | O   |
| ATOM | 2509 | CB  | ALA | A | 322 | -24.437 | -17.962 | 21.032 | 1.00 | 16.29 | C   |
| ATOM | 2510 | N   | LYS | A | 323 | -21.746 | -19.116 | 23.166 | 1.00 | 13.15 | N   |
| ATOM | 2511 | CA  | LYS | A | 323 | -20.707 | -18.569 | 24.019 | 1.00 | 13.43 | C   |
| ATOM | 2512 | C   | LYS | A | 323 | -20.251 | -17.244 | 23.408 | 1.00 | 15.07 | C   |
| ATOM | 2513 | O   | LYS | A | 323 | -20.751 | -16.180 | 23.773 | 1.00 | 14.91 | O   |
| ATOM | 2514 | CB  | LYS | A | 323 | -19.537 | -19.560 | 24.124 | 1.00 | 14.15 | C   |
| ATOM | 2515 | CG  | LYS | A | 323 | -18.201 | -18.956 | 24.571 | 1.00 | 15.59 | C   |
| ATOM | 2516 | CD  | LYS | A | 323 | -17.235 | -20.027 | 25.079 | 1.00 | 14.64 | C   |
| ATOM | 2517 | CE  | LYS | A | 323 | -15.850 | -19.935 | 24.450 | 1.00 | 14.18 | C   |
| ATOM | 2518 | NZ  | LYS | A | 323 | -15.145 | -18.696 | 24.813 | 1.00 | 15.36 | N1+ |
| ATOM | 2519 | N   | ASP | A | 324 | -19.608 | -17.372 | 22.252 | 1.00 | 17.96 | N   |
| ATOM | 2520 | CA  | ASP | A | 324 | -18.847 | -16.299 | 21.623 | 1.00 | 15.80 | C   |
| ATOM | 2521 | C   | ASP | A | 324 | -19.718 | -15.035 | 21.411 | 1.00 | 17.56 | C   |
| ATOM | 2522 | O   | ASP | A | 324 | -19.304 | -13.924 | 21.781 | 1.00 | 17.35 | O   |
| ATOM | 2523 | CB  | ASP | A | 324 | -18.233 | -16.790 | 20.275 | 1.00 | 15.91 | C   |
| ATOM | 2524 | CG  | ASP | A | 324 | -17.787 | -18.293 | 20.293 | 1.00 | 16.85 | C   |
| ATOM | 2525 | OD1 | ASP | A | 324 | -16.749 | -18.623 | 20.903 | 1.00 | 15.85 | O   |
| ATOM | 2526 | OD2 | ASP | A | 324 | -18.420 | -19.140 | 19.617 | 1.00 | 17.67 | O1- |
| ATOM | 2527 | N   | VAL | A | 325 | -20.930 | -15.180 | 20.870 | 1.00 | 15.39 | N   |
| ATOM | 2528 | CA  | VAL | A | 325 | -21.660 | -13.979 | 20.467 | 1.00 | 18.29 | C   |
| ATOM | 2529 | C   | VAL | A | 325 | -22.388 | -13.305 | 21.613 | 1.00 | 20.30 | C   |
| ATOM | 2530 | O   | VAL | A | 325 | -22.751 | -12.137 | 21.509 | 1.00 | 20.95 | O   |
| ATOM | 2531 | CB  | VAL | A | 325 | -22.693 | -14.215 | 19.333 | 1.00 | 18.19 | C   |
| ATOM | 2532 | CG1 | VAL | A | 325 | -22.039 | -14.874 | 18.125 | 1.00 | 17.25 | C   |
| ATOM | 2533 | CG2 | VAL | A | 325 | -23.875 | -15.003 | 19.849 | 1.00 | 19.92 | C   |
| ATOM | 2534 | N   | PHE | A | 326 | -22.608 | -14.039 | 22.701 | 1.00 | 23.24 | N   |
| ATOM | 2535 | CA  | PHE | A | 326 | -23.259 | -13.497 | 23.893 | 1.00 | 22.88 | C   |
| ATOM | 2536 | C   | PHE | A | 326 | -22.336 | -12.431 | 24.476 | 1.00 | 23.49 | C   |
| ATOM | 2537 | O   | PHE | A | 326 | -22.675 | -11.242 | 24.548 | 1.00 | 20.07 | O   |
| ATOM | 2538 | CB  | PHE | A | 326 | -23.474 | -14.624 | 24.911 | 1.00 | 23.89 | C   |
| ATOM | 2539 | CG  | PHE | A | 326 | -24.307 | -14.229 | 26.092 | 1.00 | 25.04 | C   |
| ATOM | 2540 | CD1 | PHE | A | 326 | -25.603 | -13.781 | 25.923 | 1.00 | 25.47 | C   |
| ATOM | 2541 | CD2 | PHE | A | 326 | -23.776 | -14.256 | 27.367 | 1.00 | 24.57 | C   |
| ATOM | 2542 | CE1 | PHE | A | 326 | -26.356 | -13.354 | 27.016 | 1.00 | 26.31 | C   |
| ATOM | 2543 | CE2 | PHE | A | 326 | -24.522 | -13.830 | 28.453 | 1.00 | 25.69 | C   |
| ATOM | 2544 | CZ  | PHE | A | 326 | -25.814 | -13.375 | 28.277 | 1.00 | 24.50 | C   |
| ATOM | 2545 | N   | LEU | A | 327 | -21.109 | -12.854 | 24.753 | 1.00 | 24.46 | N   |
| ATOM | 2546 | CA  | LEU | A | 327 | -20.056 | -11.948 | 25.200 | 1.00 | 25.44 | C   |
| ATOM | 2547 | C   | LEU | A | 327 | -19.866 | -10.805 | 24.193 | 1.00 | 23.62 | C   |
| ATOM | 2548 | O   | LEU | A | 327 | -19.782 | -9.623  | 24.568 | 1.00 | 18.87 | O   |
| ATOM | 2549 | CB  | LEU | A | 327 | -18.744 | -12.727 | 25.357 | 1.00 | 25.68 | C   |
| ATOM | 2550 | CG  | LEU | A | 327 | -18.569 | -13.566 | 26.624 | 1.00 | 22.99 | C   |
| ATOM | 2551 | CD1 | LEU | A | 327 | -18.534 | -12.630 | 27.851 | 1.00 | 21.08 | C   |
| ATOM | 2552 | CD2 | LEU | A | 327 | -19.688 | -14.578 | 26.719 | 1.00 | 21.68 | C   |
| ATOM | 2553 | N   | GLY | A | 328 | -19.861 | -11.175 | 22.911 | 1.00 | 22.86 | N   |

|      |      |     |     |   |     |         |         |        |      |       |     |
|------|------|-----|-----|---|-----|---------|---------|--------|------|-------|-----|
| ATOM | 2554 | CA  | GLY | A | 328 | -19.715 | -10.197 | 21.850 | 1.00 | 19.96 | C   |
| ATOM | 2555 | C   | GLY | A | 328 | -20.775 | -9.121  | 21.937 | 1.00 | 18.31 | C   |
| ATOM | 2556 | O   | GLY | A | 328 | -20.496 | -7.961  | 21.651 | 1.00 | 14.99 | O   |
| ATOM | 2557 | N   | MET | A | 329 | -21.988 | -9.503  | 22.332 | 1.00 | 18.03 | N   |
| ATOM | 2558 | CA  | MET | A | 329 | -23.095 | -8.563  | 22.406 | 1.00 | 16.11 | C   |
| ATOM | 2559 | C   | MET | A | 329 | -23.171 | -7.903  | 23.772 | 1.00 | 16.92 | C   |
| ATOM | 2560 | O   | MET | A | 329 | -23.768 | -6.838  | 23.930 | 1.00 | 12.56 | O   |
| ATOM | 2561 | CB  | MET | A | 329 | -24.412 | -9.253  | 22.090 | 1.00 | 15.19 | C   |
| ATOM | 2562 | CG  | MET | A | 329 | -25.567 | -8.288  | 22.048 | 1.00 | 16.53 | C   |
| ATOM | 2563 | SD  | MET | A | 329 | -26.910 | -8.847  | 21.026 | 1.00 | 19.89 | S   |
| ATOM | 2564 | CE  | MET | A | 329 | -27.585 | -7.279  | 20.531 | 1.00 | 17.00 | C   |
| ATOM | 2565 | N   | PHE | A | 330 | -22.516 | -8.495  | 24.761 | 1.00 | 18.68 | N   |
| ATOM | 2566 | CA  | PHE | A | 330 | -22.249 | -7.713  | 25.953 | 1.00 | 20.67 | C   |
| ATOM | 2567 | C   | PHE | A | 330 | -21.302 | -6.630  | 25.467 | 1.00 | 20.74 | C   |
| ATOM | 2568 | O   | PHE | A | 330 | -21.793 | -5.643  | 24.911 | 1.00 | 18.89 | O   |
| ATOM | 2569 | CB  | PHE | A | 330 | -21.628 | -8.544  | 27.091 | 1.00 | 19.97 | C   |
| ATOM | 2570 | CG  | PHE | A | 330 | -21.607 | -7.824  | 28.417 | 1.00 | 17.23 | C   |
| ATOM | 2571 | CD1 | PHE | A | 330 | -22.552 | -6.854  | 28.710 | 1.00 | 16.05 | C   |
| ATOM | 2572 | CD2 | PHE | A | 330 | -20.594 | -8.041  | 29.323 | 1.00 | 16.93 | C   |
| ATOM | 2573 | CE1 | PHE | A | 330 | -22.478 | -6.118  | 29.854 | 1.00 | 13.30 | C   |
| ATOM | 2574 | CE2 | PHE | A | 330 | -20.523 | -7.294  | 30.483 | 1.00 | 15.90 | C   |
| ATOM | 2575 | CZ  | PHE | A | 330 | -21.464 | -6.336  | 30.738 | 1.00 | 14.36 | C   |
| ATOM | 2576 | N   | LEU | A | 331 | -20.019 | -7.003  | 25.336 | 1.00 | 21.76 | N   |
| ATOM | 2577 | CA  | LEU | A | 331 | -18.930 | -6.124  | 24.885 | 1.00 | 22.65 | C   |
| ATOM | 2578 | C   | LEU | A | 331 | -19.431 | -4.988  | 24.012 | 1.00 | 26.84 | C   |
| ATOM | 2579 | O   | LEU | A | 331 | -19.549 | -3.859  | 24.503 | 1.00 | 30.55 | O   |
| ATOM | 2580 | CB  | LEU | A | 331 | -17.900 | -6.919  | 24.093 | 1.00 | 21.01 | C   |
| ATOM | 2581 | CG  | LEU | A | 331 | -16.415 | -6.566  | 24.178 | 1.00 | 21.98 | C   |
| ATOM | 2582 | CD1 | LEU | A | 331 | -16.125 | -5.467  | 25.205 | 1.00 | 18.67 | C   |
| ATOM | 2583 | CD2 | LEU | A | 331 | -15.674 | -7.848  | 24.537 | 1.00 | 19.61 | C   |
| ATOM | 2584 | N   | TYR | A | 332 | -19.930 | -5.338  | 22.816 | 1.00 | 27.17 | N   |
| ATOM | 2585 | CA  | TYR | A | 332 | -20.406 | -4.377  | 21.794 | 1.00 | 24.12 | C   |
| ATOM | 2586 | C   | TYR | A | 332 | -21.396 | -3.374  | 22.322 | 1.00 | 22.23 | C   |
| ATOM | 2587 | O   | TYR | A | 332 | -21.229 | -2.187  | 22.105 | 1.00 | 22.76 | O   |
| ATOM | 2588 | CB  | TYR | A | 332 | -21.021 | -5.134  | 20.599 | 1.00 | 22.53 | C   |
| ATOM | 2589 | CG  | TYR | A | 332 | -22.199 | -4.494  | 19.884 | 1.00 | 16.65 | C   |
| ATOM | 2590 | CD1 | TYR | A | 332 | -22.123 | -3.225  | 19.365 | 1.00 | 17.03 | C   |
| ATOM | 2591 | CD2 | TYR | A | 332 | -23.319 | -5.242  | 19.579 | 1.00 | 15.91 | C   |
| ATOM | 2592 | CE1 | TYR | A | 332 | -23.132 | -2.727  | 18.564 | 1.00 | 15.87 | C   |
| ATOM | 2593 | CE2 | TYR | A | 332 | -24.309 | -4.760  | 18.779 | 1.00 | 12.78 | C   |
| ATOM | 2594 | CZ  | TYR | A | 332 | -24.219 | -3.503  | 18.270 | 1.00 | 12.74 | C   |
| ATOM | 2595 | OH  | TYR | A | 332 | -25.211 | -3.032  | 17.443 | 1.00 | 11.75 | O   |
| ATOM | 2596 | N   | GLU | A | 333 | -22.462 | -3.858  | 22.947 | 1.00 | 21.11 | N   |
| ATOM | 2597 | CA  | GLU | A | 333 | -23.480 | -2.982  | 23.516 | 1.00 | 19.69 | C   |
| ATOM | 2598 | C   | GLU | A | 333 | -22.973 | -2.225  | 24.753 | 1.00 | 19.94 | C   |
| ATOM | 2599 | O   | GLU | A | 333 | -23.239 | -1.039  | 24.920 | 1.00 | 21.44 | O   |
| ATOM | 2600 | CB  | GLU | A | 333 | -24.722 | -3.791  | 23.854 | 1.00 | 17.19 | C   |
| ATOM | 2601 | CG  | GLU | A | 333 | -25.676 | -3.903  | 22.700 | 1.00 | 13.27 | C   |
| ATOM | 2602 | CD  | GLU | A | 333 | -26.462 | -2.640  | 22.499 | 1.00 | 16.80 | C   |
| ATOM | 2603 | OE1 | GLU | A | 333 | -26.673 | -1.903  | 23.474 | 1.00 | 17.89 | O   |
| ATOM | 2604 | OE2 | GLU | A | 333 | -26.870 | -2.358  | 21.358 | 1.00 | 21.21 | O1- |
| ATOM | 2605 | N   | TYR | A | 334 | -22.108 | -2.846  | 25.535 | 1.00 | 17.50 | N   |
| ATOM | 2606 | CA  | TYR | A | 334 | -21.473 | -2.102  | 26.591 | 1.00 | 16.87 | C   |
| ATOM | 2607 | C   | TYR | A | 334 | -20.552 | -1.074  | 25.929 | 1.00 | 17.20 | C   |
| ATOM | 2608 | O   | TYR | A | 334 | -20.643 | 0.126   | 26.220 | 1.00 | 15.06 | O   |
| ATOM | 2609 | CB  | TYR | A | 334 | -20.694 | -3.049  | 27.511 | 1.00 | 19.62 | C   |
| ATOM | 2610 | CG  | TYR | A | 334 | -20.693 | -2.600  | 28.969 | 1.00 | 21.56 | C   |
| ATOM | 2611 | CD1 | TYR | A | 334 | -20.828 | -1.258  | 29.304 | 1.00 | 23.27 | C   |
| ATOM | 2612 | CD2 | TYR | A | 334 | -20.546 | -3.503  | 29.994 | 1.00 | 19.88 | C   |
| ATOM | 2613 | CE1 | TYR | A | 334 | -20.808 | -0.840  | 30.609 | 1.00 | 21.45 | C   |
| ATOM | 2614 | CE2 | TYR | A | 334 | -20.523 | -3.084  | 31.297 | 1.00 | 21.56 | C   |
| ATOM | 2615 | CZ  | TYR | A | 334 | -20.643 | -1.750  | 31.594 | 1.00 | 21.82 | C   |
| ATOM | 2616 | OH  | TYR | A | 334 | -20.475 | -1.288  | 32.873 | 1.00 | 24.16 | O   |
| ATOM | 2617 | N   | ALA | A | 335 | -19.934 | -1.510  | 24.833 | 1.00 | 16.03 | N   |
| ATOM | 2618 | CA  | ALA | A | 335 | -18.944 | -0.733  | 24.108 | 1.00 | 15.10 | C   |
| ATOM | 2619 | C   | ALA | A | 335 | -19.581 | 0.539   | 23.577 | 1.00 | 16.13 | C   |
| ATOM | 2620 | O   | ALA | A | 335 | -19.116 | 1.638   | 23.861 | 1.00 | 17.41 | O   |
| ATOM | 2621 | CB  | ALA | A | 335 | -18.392 | -1.555  | 22.966 | 1.00 | 13.10 | C   |
| ATOM | 2622 | N   | ARG | A | 336 | -20.753 | 0.374   | 22.974 | 1.00 | 16.93 | N   |
| ATOM | 2623 | CA  | ARG | A | 336 | -21.547 | 1.458   | 22.418 | 1.00 | 16.89 | C   |
| ATOM | 2624 | C   | ARG | A | 336 | -21.658 | 2.712   | 23.290 | 1.00 | 18.08 | C   |

|      |      |     |     |   |     |         |        |        |      |       |     |
|------|------|-----|-----|---|-----|---------|--------|--------|------|-------|-----|
| ATOM | 2625 | O   | ARG | A | 336 | -21.482 | 3.820  | 22.803 | 1.00 | 16.00 | O   |
| ATOM | 2626 | CB  | ARG | A | 336 | -22.946 | 0.940  | 22.127 | 1.00 | 17.05 | C   |
| ATOM | 2627 | CG  | ARG | A | 336 | -23.108 | 0.324  | 20.776 | 1.00 | 16.01 | C   |
| ATOM | 2628 | CD  | ARG | A | 336 | -24.129 | 1.117  | 19.996 | 1.00 | 18.77 | C   |
| ATOM | 2629 | NE  | ARG | A | 336 | -25.334 | 0.350  | 19.735 | 1.00 | 23.35 | N   |
| ATOM | 2630 | CZ  | ARG | A | 336 | -25.554 | -0.337 | 18.613 | 1.00 | 26.57 | C   |
| ATOM | 2631 | NH1 | ARG | A | 336 | -24.595 | -0.458 | 17.700 | 1.00 | 24.51 | N1+ |
| ATOM | 2632 | NH2 | ARG | A | 336 | -26.743 | -0.891 | 18.390 | 1.00 | 27.93 | N   |
| ATOM | 2633 | N   | ARG | A | 337 | -22.052 | 2.543  | 24.548 | 1.00 | 21.47 | N   |
| ATOM | 2634 | CA  | ARG | A | 337 | -22.449 | 3.689  | 25.383 | 1.00 | 24.30 | C   |
| ATOM | 2635 | C   | ARG | A | 337 | -21.309 | 4.239  | 26.248 | 1.00 | 23.58 | C   |
| ATOM | 2636 | O   | ARG | A | 337 | -21.539 | 4.923  | 27.280 | 1.00 | 21.32 | O   |
| ATOM | 2637 | CB  | ARG | A | 337 | -23.657 | 3.342  | 26.285 | 1.00 | 27.68 | C   |
| ATOM | 2638 | CG  | ARG | A | 337 | -24.089 | 1.856  | 26.376 | 1.00 | 29.06 | C   |
| ATOM | 2639 | CD  | ARG | A | 337 | -25.460 | 1.731  | 27.076 | 1.00 | 29.77 | C   |
| ATOM | 2640 | NE  | ARG | A | 337 | -26.418 | 0.886  | 26.353 | 1.00 | 28.59 | N   |
| ATOM | 2641 | CZ  | ARG | A | 337 | -26.845 | 1.102  | 25.108 | 1.00 | 28.23 | C   |
| ATOM | 2642 | NH1 | ARG | A | 337 | -26.324 | 2.083  | 24.382 | 1.00 | 27.06 | N1+ |
| ATOM | 2643 | NH2 | ARG | A | 337 | -27.795 | 0.324  | 24.582 | 1.00 | 24.49 | N   |
| ATOM | 2644 | N   | HIS | A | 338 | -20.082 | 3.889  | 25.864 | 1.00 | 21.05 | N   |
| ATOM | 2645 | CA  | HIS | A | 338 | -18.922 | 4.164  | 26.703 | 1.00 | 18.37 | C   |
| ATOM | 2646 | C   | HIS | A | 338 | -17.702 | 4.574  | 25.901 | 1.00 | 13.99 | C   |
| ATOM | 2647 | O   | HIS | A | 338 | -16.611 | 4.073  | 26.118 | 1.00 | 11.40 | O   |
| ATOM | 2648 | CB  | HIS | A | 338 | -18.610 | 2.954  | 27.576 | 1.00 | 19.06 | C   |
| ATOM | 2649 | CG  | HIS | A | 338 | -19.551 | 2.791  | 28.728 | 1.00 | 21.75 | C   |
| ATOM | 2650 | CD2 | HIS | A | 338 | -19.937 | 1.685  | 29.406 | 1.00 | 21.31 | C   |
| ATOM | 2651 | ND1 | HIS | A | 338 | -20.238 | 3.847  | 29.288 | 1.00 | 22.04 | N   |
| ATOM | 2652 | CE1 | HIS | A | 338 | -21.007 | 3.394  | 30.267 | 1.00 | 25.17 | C   |
| ATOM | 2653 | NE2 | HIS | A | 338 | -20.844 | 2.087  | 30.358 | 1.00 | 21.03 | N   |
| ATOM | 2654 | N   | PRO | A | 339 | -17.826 | 5.673  | 25.169 | 1.00 | 10.97 | N   |
| ATOM | 2655 | CA  | PRO | A | 339 | -16.623 | 6.285  | 24.652 | 1.00 | 12.13 | C   |
| ATOM | 2656 | C   | PRO | A | 339 | -15.808 | 6.864  | 25.780 | 1.00 | 14.82 | C   |
| ATOM | 2657 | O   | PRO | A | 339 | -14.743 | 7.430  | 25.543 | 1.00 | 16.89 | O   |
| ATOM | 2658 | CB  | PRO | A | 339 | -17.148 | 7.379  | 23.719 | 1.00 | 12.95 | C   |
| ATOM | 2659 | CG  | PRO | A | 339 | -18.636 | 7.237  | 23.705 | 1.00 | 11.47 | C   |
| ATOM | 2660 | CD  | PRO | A | 339 | -18.985 | 6.546  | 24.970 | 1.00 | 12.68 | C   |
| ATOM | 2661 | N   | ASP | A | 340 | -16.335 | 6.799  | 26.998 | 1.00 | 16.39 | N   |
| ATOM | 2662 | CA  | ASP | A | 340 | -15.676 | 7.456  | 28.120 | 1.00 | 17.93 | C   |
| ATOM | 2663 | C   | ASP | A | 340 | -14.888 | 6.494  | 29.012 | 1.00 | 16.22 | C   |
| ATOM | 2664 | O   | ASP | A | 340 | -14.163 | 6.926  | 29.905 | 1.00 | 13.33 | O   |
| ATOM | 2665 | CB  | ASP | A | 340 | -16.689 | 8.324  | 28.916 | 1.00 | 23.67 | C   |
| ATOM | 2666 | CG  | ASP | A | 340 | -17.750 | 7.512  | 29.671 | 1.00 | 28.01 | C   |
| ATOM | 2667 | OD1 | ASP | A | 340 | -18.805 | 7.174  | 29.077 | 1.00 | 27.93 | O   |
| ATOM | 2668 | OD2 | ASP | A | 340 | -17.630 | 7.403  | 30.917 | 1.00 | 31.19 | O1- |
| ATOM | 2669 | N   | TYR | A | 341 | -14.848 | 5.230  | 28.586 | 1.00 | 16.78 | N   |
| ATOM | 2670 | CA  | TYR | A | 341 | -14.063 | 4.179  | 29.225 | 1.00 | 16.62 | C   |
| ATOM | 2671 | C   | TYR | A | 341 | -13.182 | 3.548  | 28.151 | 1.00 | 18.04 | C   |
| ATOM | 2672 | O   | TYR | A | 341 | -13.662 | 3.157  | 27.095 | 1.00 | 19.19 | O   |
| ATOM | 2673 | CB  | TYR | A | 341 | -14.956 | 3.059  | 29.782 | 1.00 | 17.89 | C   |
| ATOM | 2674 | CG  | TYR | A | 341 | -15.863 | 3.378  | 30.973 | 1.00 | 17.57 | C   |
| ATOM | 2675 | CD1 | TYR | A | 341 | -15.606 | 4.437  | 31.821 | 1.00 | 16.92 | C   |
| ATOM | 2676 | CD2 | TYR | A | 341 | -16.915 | 2.536  | 31.290 | 1.00 | 15.97 | C   |
| ATOM | 2677 | CE1 | TYR | A | 341 | -16.361 | 4.638  | 32.959 | 1.00 | 20.41 | C   |
| ATOM | 2678 | CE2 | TYR | A | 341 | -17.666 | 2.723  | 32.406 | 1.00 | 18.32 | C   |
| ATOM | 2679 | CZ  | TYR | A | 341 | -17.393 | 3.772  | 33.260 | 1.00 | 20.96 | C   |
| ATOM | 2680 | OH  | TYR | A | 341 | -18.120 | 3.905  | 34.452 | 1.00 | 18.90 | O   |
| ATOM | 2681 | N   | SER | A | 342 | -11.972 | 3.194  | 28.546 | 1.00 | 19.93 | N   |
| ATOM | 2682 | CA  | SER | A | 342 | -10.979 | 2.592  | 27.668 | 1.00 | 17.81 | C   |
| ATOM | 2683 | C   | SER | A | 342 | -11.334 | 1.153  | 27.386 | 1.00 | 17.13 | C   |
| ATOM | 2684 | O   | SER | A | 342 | -11.554 | 0.401  | 28.331 | 1.00 | 17.80 | O   |
| ATOM | 2685 | CB  | SER | A | 342 | -9.643  | 2.595  | 28.389 | 1.00 | 19.87 | C   |
| ATOM | 2686 | OG  | SER | A | 342 | -9.820  | 2.057  | 29.693 | 1.00 | 17.44 | O   |
| ATOM | 2687 | N   | VAL | A | 343 | -11.037 | 0.712  | 26.168 | 1.00 | 16.67 | N   |
| ATOM | 2688 | CA  | VAL | A | 343 | -11.195 | -0.679 | 25.788 | 1.00 | 15.06 | C   |
| ATOM | 2689 | C   | VAL | A | 343 | -10.570 | -1.594 | 26.815 | 1.00 | 15.29 | C   |
| ATOM | 2690 | O   | VAL | A | 343 | -11.284 | -2.267 | 27.538 | 1.00 | 17.32 | O   |
| ATOM | 2691 | CB  | VAL | A | 343 | -10.601 | -0.964 | 24.386 | 1.00 | 17.69 | C   |
| ATOM | 2692 | CG1 | VAL | A | 343 | -9.194  | -0.425 | 24.270 | 1.00 | 17.11 | C   |
| ATOM | 2693 | CG2 | VAL | A | 343 | -10.638 | -2.460 | 24.091 | 1.00 | 19.44 | C   |
| ATOM | 2694 | N   | VAL | A | 344 | -9.273  | -1.446 | 27.044 | 1.00 | 14.96 | N   |
| ATOM | 2695 | CA  | VAL | A | 344 | -8.571  | -2.281 | 28.013 | 1.00 | 12.81 | C   |



|      |      |     |     |   |     |         |         |        |      |       |     |
|------|------|-----|-----|---|-----|---------|---------|--------|------|-------|-----|
| ATOM | 2696 | C   | VAL | A | 344 | -9.315  | -2.430  | 29.334 | 1.00 | 14.93 | C   |
| ATOM | 2697 | O   | VAL | A | 344 | -9.358  | -3.522  | 29.872 | 1.00 | 16.62 | O   |
| ATOM | 2698 | CB  | VAL | A | 344 | -7.169  | -1.751  | 28.262 | 1.00 | 9.56  | C   |
| ATOM | 2699 | CG1 | VAL | A | 344 | -6.537  | -2.427  | 29.439 | 1.00 | 11.59 | C   |
| ATOM | 2700 | CG2 | VAL | A | 344 | -6.344  | -1.992  | 27.048 | 1.00 | 15.07 | C   |
| ATOM | 2701 | N   | LEU | A | 345 | -10.048 | -1.400  | 29.763 | 1.00 | 16.26 | N   |
| ATOM | 2702 | CA  | LEU | A | 345 | -10.925 | -1.526  | 30.942 | 1.00 | 17.05 | C   |
| ATOM | 2703 | C   | LEU | A | 345 | -12.105 | -2.415  | 30.592 | 1.00 | 15.69 | C   |
| ATOM | 2704 | O   | LEU | A | 345 | -12.294 | -3.481  | 31.172 | 1.00 | 14.48 | O   |
| ATOM | 2705 | CB  | LEU | A | 345 | -11.459 | -0.159  | 31.392 | 1.00 | 18.45 | C   |
| ATOM | 2706 | CG  | LEU | A | 345 | -11.962 | 0.060   | 32.830 | 1.00 | 18.68 | C   |
| ATOM | 2707 | CD1 | LEU | A | 345 | -13.262 | -0.629  | 33.058 | 1.00 | 17.13 | C   |
| ATOM | 2708 | CD2 | LEU | A | 345 | -10.926 | -0.419  | 33.841 | 1.00 | 21.35 | C   |
| ATOM | 2709 | N   | LEU | A | 346 | -12.855 | -1.992  | 29.588 | 1.00 | 14.21 | N   |
| ATOM | 2710 | CA  | LEU | A | 346 | -14.109 | -2.633  | 29.226 | 1.00 | 14.41 | C   |
| ATOM | 2711 | C   | LEU | A | 346 | -13.900 | -4.106  | 28.967 | 1.00 | 15.55 | C   |
| ATOM | 2712 | O   | LEU | A | 346 | -14.832 | -4.889  | 29.076 | 1.00 | 16.56 | O   |
| ATOM | 2713 | CB  | LEU | A | 346 | -14.688 | -1.981  | 27.970 | 1.00 | 14.22 | C   |
| ATOM | 2714 | CG  | LEU | A | 346 | -16.004 | -1.213  | 27.991 | 1.00 | 11.29 | C   |
| ATOM | 2715 | CD1 | LEU | A | 346 | -16.066 | -0.240  | 29.135 | 1.00 | 13.74 | C   |
| ATOM | 2716 | CD2 | LEU | A | 346 | -16.105 | -0.487  | 26.692 | 1.00 | 11.30 | C   |
| ATOM | 2717 | N   | LEU | A | 347 | -12.680 | -4.472  | 28.591 | 1.00 | 17.67 | N   |
| ATOM | 2718 | CA  | LEU | A | 347 | -12.325 | -5.868  | 28.316 | 1.00 | 18.46 | C   |
| ATOM | 2719 | C   | LEU | A | 347 | -12.252 | -6.655  | 29.618 | 1.00 | 18.38 | C   |
| ATOM | 2720 | O   | LEU | A | 347 | -12.542 | -7.844  | 29.626 | 1.00 | 18.38 | O   |
| ATOM | 2721 | CB  | LEU | A | 347 | -10.977 | -5.941  | 27.598 | 1.00 | 18.93 | C   |
| ATOM | 2722 | CG  | LEU | A | 347 | -10.687 | -7.030  | 26.566 | 1.00 | 18.83 | C   |
| ATOM | 2723 | CD1 | LEU | A | 347 | -11.567 | -8.246  | 26.778 | 1.00 | 17.43 | C   |
| ATOM | 2724 | CD2 | LEU | A | 347 | -10.883 | -6.449  | 25.188 | 1.00 | 17.31 | C   |
| ATOM | 2725 | N   | ARG | A | 348 | -11.908 | -5.966  | 30.710 | 1.00 | 18.37 | N   |
| ATOM | 2726 | CA  | ARG | A | 348 | -12.082 | -6.454  | 32.088 | 1.00 | 19.23 | C   |
| ATOM | 2727 | C   | ARG | A | 348 | -13.543 | -6.617  | 32.563 | 1.00 | 19.03 | C   |
| ATOM | 2728 | O   | ARG | A | 348 | -13.821 | -7.463  | 33.423 | 1.00 | 21.17 | O   |
| ATOM | 2729 | CB  | ARG | A | 348 | -11.365 | -5.526  | 33.060 | 1.00 | 17.92 | C   |
| ATOM | 2730 | CG  | ARG | A | 348 | -9.954  | -5.943  | 33.395 | 1.00 | 21.29 | C   |
| ATOM | 2731 | CD  | ARG | A | 348 | -9.199  | -4.790  | 34.054 | 1.00 | 22.78 | C   |
| ATOM | 2732 | NE  | ARG | A | 348 | -7.997  | -5.281  | 34.717 | 1.00 | 25.21 | N   |
| ATOM | 2733 | CZ  | ARG | A | 348 | -7.661  | -5.008  | 35.977 | 1.00 | 26.74 | C   |
| ATOM | 2734 | NH1 | ARG | A | 348 | -8.245  | -4.007  | 36.636 | 1.00 | 24.24 | N1+ |
| ATOM | 2735 | NH2 | ARG | A | 348 | -6.631  | -5.644  | 36.530 | 1.00 | 25.87 | N   |
| ATOM | 2736 | N   | LEU | A | 349 | -14.437 | -5.728  | 32.119 | 1.00 | 15.77 | N   |
| ATOM | 2737 | CA  | LEU | A | 349 | -15.868 | -5.894  | 32.346 | 1.00 | 11.96 | C   |
| ATOM | 2738 | C   | LEU | A | 349 | -16.417 | -7.004  | 31.453 | 1.00 | 14.75 | C   |
| ATOM | 2739 | O   | LEU | A | 349 | -17.446 | -7.619  | 31.748 | 1.00 | 16.02 | O   |
| ATOM | 2740 | CB  | LEU | A | 349 | -16.599 | -4.603  | 32.054 | 1.00 | 6.86  | C   |
| ATOM | 2741 | CG  | LEU | A | 349 | -16.030 | -3.328  | 32.671 | 1.00 | 12.17 | C   |
| ATOM | 2742 | CD1 | LEU | A | 349 | -17.117 | -2.246  | 32.667 | 1.00 | 14.15 | C   |
| ATOM | 2743 | CD2 | LEU | A | 349 | -15.553 | -3.568  | 34.090 | 1.00 | 10.52 | C   |
| ATOM | 2744 | N   | ALA | A | 350 | -15.667 | -7.344  | 30.416 | 1.00 | 15.21 | N   |
| ATOM | 2745 | CA  | ALA | A | 350 | -16.061 | -8.424  | 29.539 | 1.00 | 16.39 | C   |
| ATOM | 2746 | C   | ALA | A | 350 | -15.410 | -9.730  | 29.963 | 1.00 | 17.56 | C   |
| ATOM | 2747 | O   | ALA | A | 350 | -15.616 | -10.767 | 29.332 | 1.00 | 17.63 | O   |
| ATOM | 2748 | CB  | ALA | A | 350 | -15.695 | -8.084  | 28.116 | 1.00 | 17.35 | C   |
| ATOM | 2749 | N   | LYS | A | 351 | -14.654 | -9.688  | 31.057 | 1.00 | 19.16 | N   |
| ATOM | 2750 | CA  | LYS | A | 351 | -14.267 | -10.913 | 31.747 | 1.00 | 20.56 | C   |
| ATOM | 2751 | C   | LYS | A | 351 | -14.763 | -11.048 | 33.166 | 1.00 | 20.35 | C   |
| ATOM | 2752 | O   | LYS | A | 351 | -14.523 | -12.083 | 33.770 | 1.00 | 20.19 | O   |
| ATOM | 2753 | CB  | LYS | A | 351 | -12.756 | -11.122 | 31.726 | 1.00 | 23.48 | C   |
| ATOM | 2754 | CG  | LYS | A | 351 | -12.300 | -12.152 | 30.682 | 1.00 | 29.67 | C   |
| ATOM | 2755 | CD  | LYS | A | 351 | -12.868 | -11.815 | 29.274 | 1.00 | 33.17 | C   |
| ATOM | 2756 | CE  | LYS | A | 351 | -11.936 | -12.235 | 28.116 | 1.00 | 33.44 | C   |
| ATOM | 2757 | NZ  | LYS | A | 351 | -12.007 | -11.236 | 26.983 | 1.00 | 31.75 | N1+ |
| ATOM | 2758 | N   | THR | A | 352 | -15.548 | -10.079 | 33.651 | 1.00 | 22.45 | N   |
| ATOM | 2759 | CA  | THR | A | 352 | -16.326 | -10.254 | 34.892 | 1.00 | 25.02 | C   |
| ATOM | 2760 | C   | THR | A | 352 | -17.850 | -10.434 | 34.671 | 1.00 | 27.15 | C   |
| ATOM | 2761 | O   | THR | A | 352 | -18.596 | -10.768 | 35.590 | 1.00 | 28.15 | O   |
| ATOM | 2762 | CB  | THR | A | 352 | -16.105 | -9.093  | 35.854 | 1.00 | 25.24 | C   |
| ATOM | 2763 | CG2 | THR | A | 352 | -16.302 | -9.557  | 37.305 | 1.00 | 25.36 | C   |
| ATOM | 2764 | OG1 | THR | A | 352 | -14.772 | -8.583  | 35.690 | 1.00 | 27.53 | O   |
| ATOM | 2765 | N   | TYR | A | 353 | -18.314 | -10.227 | 33.443 | 1.00 | 28.56 | N   |
| ATOM | 2766 | CA  | TYR | A | 353 | -19.436 | -11.009 | 32.951 | 1.00 | 27.35 | C   |

|      |      |     |     |   |     |         |         |        |      |       |     |
|------|------|-----|-----|---|-----|---------|---------|--------|------|-------|-----|
| ATOM | 2767 | C   | TYR | A | 353 | -18.988 | -12.487 | 32.781 | 1.00 | 28.05 | C   |
| ATOM | 2768 | O   | TYR | A | 353 | -19.141 | -13.277 | 33.718 | 1.00 | 29.94 | O   |
| ATOM | 2769 | CB  | TYR | A | 353 | -19.942 | -10.427 | 31.629 | 1.00 | 25.44 | C   |
| ATOM | 2770 | CG  | TYR | A | 353 | -21.447 | -10.511 | 31.448 | 1.00 | 24.45 | C   |
| ATOM | 2771 | CD1 | TYR | A | 353 | -22.327 | -10.076 | 32.455 | 1.00 | 21.15 | C   |
| ATOM | 2772 | CD2 | TYR | A | 353 | -21.991 | -11.122 | 30.316 | 1.00 | 22.41 | C   |
| ATOM | 2773 | CE1 | TYR | A | 353 | -23.705 | -10.270 | 32.338 | 1.00 | 18.94 | C   |
| ATOM | 2774 | CE2 | TYR | A | 353 | -23.364 | -11.318 | 30.195 | 1.00 | 19.82 | C   |
| ATOM | 2775 | CZ  | TYR | A | 353 | -24.208 | -10.906 | 31.206 | 1.00 | 19.86 | C   |
| ATOM | 2776 | OH  | TYR | A | 353 | -25.525 | -11.262 | 31.124 | 1.00 | 18.86 | O   |
| ATOM | 2777 | N   | GLU | A | 354 | -18.244 | -12.794 | 31.714 | 1.00 | 25.58 | N   |
| ATOM | 2778 | CA  | GLU | A | 354 | -17.941 | -14.192 | 31.332 | 1.00 | 24.34 | C   |
| ATOM | 2779 | C   | GLU | A | 354 | -17.618 | -15.178 | 32.445 | 1.00 | 23.15 | C   |
| ATOM | 2780 | O   | GLU | A | 354 | -17.902 | -16.361 | 32.315 | 1.00 | 21.79 | O   |
| ATOM | 2781 | CB  | GLU | A | 354 | -16.774 | -14.261 | 30.346 | 1.00 | 25.14 | C   |
| ATOM | 2782 | CG  | GLU | A | 354 | -16.485 | -15.694 | 29.867 | 1.00 | 24.30 | C   |
| ATOM | 2783 | CD  | GLU | A | 354 | -15.011 | -16.006 | 29.672 | 1.00 | 23.93 | C   |
| ATOM | 2784 | OE1 | GLU | A | 354 | -14.145 | -15.338 | 30.288 | 1.00 | 22.57 | O   |
| ATOM | 2785 | OE2 | GLU | A | 354 | -14.727 | -16.952 | 28.905 | 1.00 | 22.72 | O1- |
| ATOM | 2786 | N   | THR | A | 355 | -16.746 | -14.776 | 33.353 | 1.00 | 22.89 | N   |
| ATOM | 2787 | CA  | THR | A | 355 | -16.424 | -15.652 | 34.455 | 1.00 | 21.39 | C   |
| ATOM | 2788 | C   | THR | A | 355 | -17.689 | -15.821 | 35.259 | 1.00 | 23.76 | C   |
| ATOM | 2789 | O   | THR | A | 355 | -18.292 | -16.908 | 35.252 | 1.00 | 24.10 | O   |
| ATOM | 2790 | CB  | THR | A | 355 | -15.414 | -15.041 | 35.375 | 1.00 | 22.64 | C   |
| ATOM | 2791 | CG2 | THR | A | 355 | -14.930 | -16.101 | 36.358 | 1.00 | 23.56 | C   |
| ATOM | 2792 | OG1 | THR | A | 355 | -14.333 | -14.484 | 34.609 | 1.00 | 23.91 | O   |
| ATOM | 2793 | N   | THR | A | 356 | -18.140 | -14.704 | 35.852 | 1.00 | 23.40 | N   |
| ATOM | 2794 | CA  | THR | A | 356 | -19.244 | -14.695 | 36.812 | 1.00 | 23.16 | C   |
| ATOM | 2795 | C   | THR | A | 356 | -20.470 | -15.421 | 36.293 | 1.00 | 22.64 | C   |
| ATOM | 2796 | O   | THR | A | 356 | -20.910 | -16.389 | 36.901 | 1.00 | 24.94 | O   |
| ATOM | 2797 | CB  | THR | A | 356 | -19.636 | -13.257 | 37.216 | 1.00 | 24.04 | C   |
| ATOM | 2798 | CG2 | THR | A | 356 | -21.004 | -13.225 | 37.905 | 1.00 | 21.12 | C   |
| ATOM | 2799 | OG1 | THR | A | 356 | -18.647 | -12.740 | 38.121 | 1.00 | 28.79 | O   |
| ATOM | 2800 | N   | LEU | A | 357 | -20.936 | -15.060 | 35.105 | 1.00 | 19.87 | N   |
| ATOM | 2801 | CA  | LEU | A | 357 | -22.092 | -15.724 | 34.542 | 1.00 | 16.07 | C   |
| ATOM | 2802 | C   | LEU | A | 357 | -21.893 | -17.215 | 34.408 | 1.00 | 16.68 | C   |
| ATOM | 2803 | O   | LEU | A | 357 | -22.844 | -17.937 | 34.102 | 1.00 | 16.65 | O   |
| ATOM | 2804 | CB  | LEU | A | 357 | -22.428 | -15.140 | 33.189 | 1.00 | 13.80 | C   |
| ATOM | 2805 | CG  | LEU | A | 357 | -23.662 | -14.274 | 33.305 | 1.00 | 14.12 | C   |
| ATOM | 2806 | CD1 | LEU | A | 357 | -23.278 | -12.964 | 33.979 | 1.00 | 11.35 | C   |
| ATOM | 2807 | CD2 | LEU | A | 357 | -24.275 | -14.076 | 31.936 | 1.00 | 9.43  | C   |
| ATOM | 2808 | N   | GLU | A | 358 | -20.639 | -17.653 | 34.510 | 1.00 | 18.54 | N   |
| ATOM | 2809 | CA  | GLU | A | 358 | -20.306 | -19.077 | 34.509 | 1.00 | 22.18 | C   |
| ATOM | 2810 | C   | GLU | A | 358 | -20.175 | -19.565 | 35.932 | 1.00 | 23.29 | C   |
| ATOM | 2811 | O   | GLU | A | 358 | -20.495 | -20.722 | 36.210 | 1.00 | 25.03 | O   |
| ATOM | 2812 | CB  | GLU | A | 358 | -19.004 | -19.353 | 33.731 | 1.00 | 25.37 | C   |
| ATOM | 2813 | CG  | GLU | A | 358 | -19.208 | -20.016 | 32.329 | 1.00 | 29.81 | C   |
| ATOM | 2814 | CD  | GLU | A | 358 | -19.717 | -19.054 | 31.220 | 1.00 | 30.46 | C   |
| ATOM | 2815 | OE1 | GLU | A | 358 | -18.859 | -18.380 | 30.586 | 1.00 | 30.40 | O   |
| ATOM | 2816 | OE2 | GLU | A | 358 | -20.946 | -19.046 | 30.925 | 1.00 | 25.21 | O1- |
| ATOM | 2817 | N   | LYS | A | 359 | -19.818 | -18.642 | 36.833 | 1.00 | 22.28 | N   |
| ATOM | 2818 | CA  | LYS | A | 359 | -19.902 | -18.823 | 38.294 | 1.00 | 21.07 | C   |
| ATOM | 2819 | C   | LYS | A | 359 | -21.329 | -19.097 | 38.762 | 1.00 | 21.42 | C   |
| ATOM | 2820 | O   | LYS | A | 359 | -21.543 | -19.518 | 39.903 | 1.00 | 21.98 | O   |
| ATOM | 2821 | CB  | LYS | A | 359 | -19.409 | -17.562 | 39.021 | 1.00 | 20.11 | C   |
| ATOM | 2822 | CG  | LYS | A | 359 | -18.134 | -17.700 | 39.848 | 1.00 | 22.37 | C   |
| ATOM | 2823 | CD  | LYS | A | 359 | -17.703 | -19.159 | 40.055 | 1.00 | 24.00 | C   |
| ATOM | 2824 | CE  | LYS | A | 359 | -16.830 | -19.349 | 41.307 | 1.00 | 24.54 | C   |
| ATOM | 2825 | NZ  | LYS | A | 359 | -17.624 | -19.380 | 42.606 | 1.00 | 21.49 | N1+ |
| ATOM | 2826 | N   | CYS | A | 360 | -22.304 | -18.705 | 37.946 | 1.00 | 22.87 | N   |
| ATOM | 2827 | CA  | CYS | A | 360 | -23.709 | -18.847 | 38.318 | 1.00 | 24.14 | C   |
| ATOM | 2828 | C   | CYS | A | 360 | -24.710 | -18.775 | 37.158 | 1.00 | 23.71 | C   |
| ATOM | 2829 | O   | CYS | A | 360 | -25.613 | -17.929 | 37.133 | 1.00 | 24.52 | O   |
| ATOM | 2830 | CB  | CYS | A | 360 | -24.057 | -17.808 | 39.374 | 1.00 | 24.78 | C   |
| ATOM | 2831 | SG  | CYS | A | 360 | -22.748 | -16.563 | 39.608 | 1.00 | 26.85 | S   |
| ATOM | 2832 | N   | CYS | A | 361 | -24.405 | -19.527 | 36.113 | 1.00 | 22.64 | N   |
| ATOM | 2833 | CA  | CYS | A | 361 | -25.419 | -20.138 | 35.292 | 1.00 | 22.37 | C   |
| ATOM | 2834 | C   | CYS | A | 361 | -25.485 | -21.605 | 35.702 | 1.00 | 23.29 | C   |
| ATOM | 2835 | O   | CYS | A | 361 | -26.339 | -22.359 | 35.231 | 1.00 | 23.57 | O   |
| ATOM | 2836 | CB  | CYS | A | 361 | -25.025 | -20.055 | 33.828 | 1.00 | 23.14 | C   |
| ATOM | 2837 | SG  | CYS | A | 361 | -26.368 | -19.332 | 32.880 | 1.00 | 26.83 | S   |

|      |      |     |     |   |     |         |         |        |      |       |     |
|------|------|-----|-----|---|-----|---------|---------|--------|------|-------|-----|
| ATOM | 2838 | N   | ALA | A | 362 | -24.508 | -22.030 | 36.497 | 1.00 | 23.59 | N   |
| ATOM | 2839 | CA  | ALA | A | 362 | -24.434 | -23.405 | 36.944 | 1.00 | 25.12 | C   |
| ATOM | 2840 | C   | ALA | A | 362 | -25.368 | -23.670 | 38.107 | 1.00 | 25.80 | C   |
| ATOM | 2841 | O   | ALA | A | 362 | -26.545 | -23.951 | 37.901 | 1.00 | 26.67 | O   |
| ATOM | 2842 | CB  | ALA | A | 362 | -22.999 | -23.748 | 37.342 | 1.00 | 27.30 | C   |
| ATOM | 2843 | N   | ALA | A | 363 | -24.858 | -23.502 | 39.326 | 1.00 | 23.91 | N   |
| ATOM | 2844 | CA  | ALA | A | 363 | -25.445 | -24.155 | 40.488 | 1.00 | 26.21 | C   |
| ATOM | 2845 | C   | ALA | A | 363 | -26.359 | -23.304 | 41.386 | 1.00 | 26.42 | C   |
| ATOM | 2846 | O   | ALA | A | 363 | -26.234 | -22.069 | 41.407 | 1.00 | 24.96 | O   |
| ATOM | 2847 | CB  | ALA | A | 363 | -24.331 | -24.804 | 41.343 | 1.00 | 25.36 | C   |
| ATOM | 2848 | N   | ALA | A | 364 | -27.415 | -23.948 | 41.912 | 1.00 | 28.14 | N   |
| ATOM | 2849 | CA  | ALA | A | 364 | -28.010 | -23.673 | 43.236 | 1.00 | 31.01 | C   |
| ATOM | 2850 | C   | ALA | A | 364 | -28.676 | -22.323 | 43.366 | 1.00 | 32.95 | C   |
| ATOM | 2851 | O   | ALA | A | 364 | -28.424 | -21.582 | 44.343 | 1.00 | 33.01 | O   |
| ATOM | 2852 | CB  | ALA | A | 364 | -26.941 | -23.792 | 44.302 | 1.00 | 32.09 | C   |
| ATOM | 2853 | N   | ASP | A | 365 | -29.630 | -22.080 | 42.470 | 1.00 | 33.49 | N   |
| ATOM | 2854 | CA  | ASP | A | 365 | -30.065 | -20.719 | 42.092 | 1.00 | 32.31 | C   |
| ATOM | 2855 | C   | ASP | A | 365 | -30.308 | -19.789 | 43.290 | 1.00 | 34.06 | C   |
| ATOM | 2856 | O   | ASP | A | 365 | -30.266 | -20.216 | 44.442 | 1.00 | 35.19 | O   |
| ATOM | 2857 | CB  | ASP | A | 365 | -31.305 | -20.839 | 41.165 | 1.00 | 30.17 | C   |
| ATOM | 2858 | CG  | ASP | A | 365 | -32.215 | -21.973 | 41.556 | 1.00 | 27.56 | C   |
| ATOM | 2859 | OD1 | ASP | A | 365 | -32.811 | -21.879 | 42.644 | 1.00 | 25.00 | O   |
| ATOM | 2860 | OD2 | ASP | A | 365 | -32.379 | -22.899 | 40.741 | 1.00 | 24.35 | O1- |
| ATOM | 2861 | N   | PRO | A | 366 | -30.401 | -18.469 | 43.078 | 1.00 | 34.76 | N   |
| ATOM | 2862 | CA  | PRO | A | 366 | -31.123 | -17.957 | 41.922 | 1.00 | 34.85 | C   |
| ATOM | 2863 | C   | PRO | A | 366 | -30.281 | -16.923 | 41.199 | 1.00 | 35.81 | C   |
| ATOM | 2864 | O   | PRO | A | 366 | -29.071 | -17.095 | 41.054 | 1.00 | 36.75 | O   |
| ATOM | 2865 | CB  | PRO | A | 366 | -32.402 | -17.379 | 42.539 | 1.00 | 33.58 | C   |
| ATOM | 2866 | CG  | PRO | A | 366 | -31.998 | -16.969 | 43.986 | 1.00 | 34.17 | C   |
| ATOM | 2867 | CD  | PRO | A | 366 | -30.585 | -17.580 | 44.243 | 1.00 | 35.22 | C   |
| ATOM | 2868 | N   | HIS | A | 367 | -30.879 | -15.760 | 40.952 | 1.00 | 35.99 | N   |
| ATOM | 2869 | CA  | HIS | A | 367 | -30.318 | -14.767 | 40.058 | 1.00 | 32.68 | C   |
| ATOM | 2870 | C   | HIS | A | 367 | -29.370 | -13.770 | 40.677 | 1.00 | 32.19 | C   |
| ATOM | 2871 | O   | HIS | A | 367 | -28.438 | -13.300 | 40.019 | 1.00 | 32.60 | O   |
| ATOM | 2872 | CB  | HIS | A | 367 | -31.447 | -14.017 | 39.383 | 1.00 | 30.02 | C   |
| ATOM | 2873 | CG  | HIS | A | 367 | -31.860 | -14.638 | 38.108 | 1.00 | 25.99 | C   |
| ATOM | 2874 | CD2 | HIS | A | 367 | -32.718 | -14.223 | 37.152 | 1.00 | 26.12 | C   |
| ATOM | 2875 | ND1 | HIS | A | 367 | -31.248 | -15.773 | 37.620 | 1.00 | 25.25 | N   |
| ATOM | 2876 | CE1 | HIS | A | 367 | -31.706 | -16.026 | 36.408 | 1.00 | 27.08 | C   |
| ATOM | 2877 | NE2 | HIS | A | 367 | -32.598 | -15.099 | 36.097 | 1.00 | 29.00 | N   |
| ATOM | 2878 | N   | GLU | A | 368 | -29.538 | -13.526 | 41.962 | 1.00 | 30.39 | N   |
| ATOM | 2879 | CA  | GLU | A | 368 | -28.843 | -12.426 | 42.577 | 1.00 | 29.24 | C   |
| ATOM | 2880 | C   | GLU | A | 368 | -27.331 | -12.453 | 42.287 | 1.00 | 28.13 | C   |
| ATOM | 2881 | O   | GLU | A | 368 | -26.729 | -11.384 | 42.163 | 1.00 | 26.88 | O   |
| ATOM | 2882 | CB  | GLU | A | 368 | -29.136 | -12.413 | 44.090 | 1.00 | 29.55 | C   |
| ATOM | 2883 | CG  | GLU | A | 368 | -30.634 | -12.566 | 44.422 | 1.00 | 25.73 | C   |
| ATOM | 2884 | CD  | GLU | A | 368 | -31.265 | -11.300 | 44.974 | 1.00 | 24.58 | C   |
| ATOM | 2885 | OE1 | GLU | A | 368 | -30.521 | -10.338 | 45.266 | 1.00 | 25.16 | O   |
| ATOM | 2886 | OE2 | GLU | A | 368 | -32.498 | -11.296 | 45.176 | 1.00 | 21.06 | O1- |
| ATOM | 2887 | N   | CYS | A | 369 | -26.758 | -13.638 | 42.021 | 1.00 | 26.26 | N   |
| ATOM | 2888 | CA  | CYS | A | 369 | -25.313 | -13.757 | 41.759 | 1.00 | 24.90 | C   |
| ATOM | 2889 | C   | CYS | A | 369 | -24.874 | -12.701 | 40.778 | 1.00 | 25.23 | C   |
| ATOM | 2890 | O   | CYS | A | 369 | -23.911 | -12.003 | 41.032 | 1.00 | 25.76 | O   |
| ATOM | 2891 | CB  | CYS | A | 369 | -24.941 | -15.093 | 41.136 | 1.00 | 25.85 | C   |
| ATOM | 2892 | SG  | CYS | A | 369 | -23.840 | -14.850 | 39.683 | 1.00 | 28.33 | S   |
| ATOM | 2893 | N   | TYR | A | 370 | -25.488 | -12.721 | 39.593 | 1.00 | 24.71 | N   |
| ATOM | 2894 | CA  | TYR | A | 370 | -25.245 | -11.722 | 38.563 | 1.00 | 23.51 | C   |
| ATOM | 2895 | C   | TYR | A | 370 | -26.029 | -10.420 | 38.757 | 1.00 | 24.62 | C   |
| ATOM | 2896 | O   | TYR | A | 370 | -25.953 | -9.523  | 37.906 | 1.00 | 23.98 | O   |
| ATOM | 2897 | CB  | TYR | A | 370 | -25.537 | -12.308 | 37.178 | 1.00 | 24.52 | C   |
| ATOM | 2898 | CG  | TYR | A | 370 | -26.989 | -12.560 | 36.798 | 1.00 | 22.90 | C   |
| ATOM | 2899 | CD1 | TYR | A | 370 | -27.771 | -11.529 | 36.277 | 1.00 | 24.94 | C   |
| ATOM | 2900 | CD2 | TYR | A | 370 | -27.445 | -13.861 | 36.605 | 1.00 | 22.80 | C   |
| ATOM | 2901 | CE1 | TYR | A | 370 | -28.942 | -11.789 | 35.548 | 1.00 | 23.26 | C   |
| ATOM | 2902 | CE2 | TYR | A | 370 | -28.605 | -14.126 | 35.880 | 1.00 | 21.68 | C   |
| ATOM | 2903 | CZ  | TYR | A | 370 | -29.347 | -13.085 | 35.357 | 1.00 | 22.31 | C   |
| ATOM | 2904 | OH  | TYR | A | 370 | -30.530 | -13.345 | 34.705 | 1.00 | 19.63 | O   |
| ATOM | 2905 | N   | ALA | A | 371 | -26.806 | -10.341 | 39.843 | 1.00 | 22.53 | N   |
| ATOM | 2906 | CA  | ALA | A | 371 | -27.517 | -9.121  | 40.212 | 1.00 | 20.95 | C   |
| ATOM | 2907 | C   | ALA | A | 371 | -26.534 | -8.002  | 40.483 | 1.00 | 21.22 | C   |
| ATOM | 2908 | O   | ALA | A | 371 | -25.767 | -8.032  | 41.452 | 1.00 | 18.20 | O   |

|      |      |     |     |   |     |         |        |        |      |       |     |
|------|------|-----|-----|---|-----|---------|--------|--------|------|-------|-----|
| ATOM | 2909 | CB  | ALA | A | 371 | -28.392 | -9.347 | 41.437 | 1.00 | 20.29 | C   |
| ATOM | 2910 | N   | LYS | A | 372 | -26.618 | -6.979 | 39.644 | 1.00 | 23.07 | N   |
| ATOM | 2911 | CA  | LYS | A | 372 | -25.638 | -5.897 | 39.648 | 1.00 | 26.70 | C   |
| ATOM | 2912 | C   | LYS | A | 372 | -24.221 | -6.384 | 39.978 | 1.00 | 28.46 | C   |
| ATOM | 2913 | O   | LYS | A | 372 | -23.624 | -5.993 | 41.000 | 1.00 | 26.84 | O   |
| ATOM | 2914 | CB  | LYS | A | 372 | -26.041 | -4.787 | 40.619 | 1.00 | 25.91 | C   |
| ATOM | 2915 | CG  | LYS | A | 372 | -27.377 | -4.140 | 40.291 | 1.00 | 25.48 | C   |
| ATOM | 2916 | CD  | LYS | A | 372 | -27.886 | -3.362 | 41.489 | 1.00 | 21.87 | C   |
| ATOM | 2917 | CE  | LYS | A | 372 | -26.866 | -2.361 | 41.922 | 1.00 | 18.47 | C   |
| ATOM | 2918 | NZ  | LYS | A | 372 | -26.407 | -1.618 | 40.728 | 1.00 | 20.65 | N1+ |
| ATOM | 2919 | N   | VAL | A | 373 | -23.710 | -7.262 | 39.109 | 1.00 | 27.77 | N   |
| ATOM | 2920 | CA  | VAL | A | 373 | -22.311 | -7.224 | 38.739 | 1.00 | 24.92 | C   |
| ATOM | 2921 | C   | VAL | A | 373 | -21.958 | -5.773 | 38.482 | 1.00 | 24.34 | C   |
| ATOM | 2922 | O   | VAL | A | 373 | -20.982 | -5.276 | 39.007 | 1.00 | 23.37 | O   |
| ATOM | 2923 | CB  | VAL | A | 373 | -22.036 | -8.008 | 37.459 | 1.00 | 25.87 | C   |
| ATOM | 2924 | CG1 | VAL | A | 373 | -21.594 | -9.423 | 37.811 | 1.00 | 27.81 | C   |
| ATOM | 2925 | CG2 | VAL | A | 373 | -23.271 | -8.017 | 36.564 | 1.00 | 25.54 | C   |
| ATOM | 2926 | N   | PHE | A | 374 | -22.878 | -5.047 | 37.856 | 1.00 | 25.35 | N   |
| ATOM | 2927 | CA  | PHE | A | 374 | -22.738 | -3.597 | 37.666 | 1.00 | 25.95 | C   |
| ATOM | 2928 | C   | PHE | A | 374 | -22.261 | -2.928 | 38.950 | 1.00 | 26.20 | C   |
| ATOM | 2929 | O   | PHE | A | 374 | -21.593 | -1.880 | 38.921 | 1.00 | 21.77 | O   |
| ATOM | 2930 | CB  | PHE | A | 374 | -24.083 | -2.995 | 37.222 | 1.00 | 25.29 | C   |
| ATOM | 2931 | CG  | PHE | A | 374 | -24.338 | -3.095 | 35.744 | 1.00 | 24.61 | C   |
| ATOM | 2932 | CD1 | PHE | A | 374 | -23.850 | -4.157 | 35.010 | 1.00 | 25.83 | C   |
| ATOM | 2933 | CD2 | PHE | A | 374 | -25.029 | -2.096 | 35.083 | 1.00 | 27.32 | C   |
| ATOM | 2934 | CE1 | PHE | A | 374 | -24.043 | -4.218 | 33.648 | 1.00 | 27.69 | C   |
| ATOM | 2935 | CE2 | PHE | A | 374 | -25.224 | -2.145 | 33.714 | 1.00 | 26.77 | C   |
| ATOM | 2936 | CZ  | PHE | A | 374 | -24.731 | -3.208 | 32.999 | 1.00 | 27.96 | C   |
| ATOM | 2937 | N   | ASP | A | 375 | -22.562 | -3.601 | 40.064 | 1.00 | 29.26 | N   |
| ATOM | 2938 | CA  | ASP | A | 375 | -22.212 | -3.148 | 41.409 | 1.00 | 31.59 | C   |
| ATOM | 2939 | C   | ASP | A | 375 | -21.374 | -4.155 | 42.225 | 1.00 | 29.82 | C   |
| ATOM | 2940 | O   | ASP | A | 375 | -21.614 | -4.358 | 43.415 | 1.00 | 29.59 | O   |
| ATOM | 2941 | CB  | ASP | A | 375 | -23.477 | -2.747 | 42.176 | 1.00 | 31.39 | C   |
| ATOM | 2942 | CG  | ASP | A | 375 | -23.954 | -1.340 | 41.817 | 1.00 | 32.35 | C   |
| ATOM | 2943 | OD1 | ASP | A | 375 | -23.865 | -0.935 | 40.627 | 1.00 | 30.78 | O   |
| ATOM | 2944 | OD2 | ASP | A | 375 | -24.511 | -0.658 | 42.715 | 1.00 | 36.30 | O1- |
| ATOM | 2945 | N   | GLU | A | 376 | -20.457 | -4.836 | 41.539 | 1.00 | 28.50 | N   |
| ATOM | 2946 | CA  | GLU | A | 376 | -19.115 | -5.035 | 42.053 | 1.00 | 26.94 | C   |
| ATOM | 2947 | C   | GLU | A | 376 | -18.043 | -5.009 | 40.962 | 1.00 | 26.28 | C   |
| ATOM | 2948 | O   | GLU | A | 376 | -16.887 | -5.333 | 41.245 | 1.00 | 28.07 | O   |
| ATOM | 2949 | CB  | GLU | A | 376 | -19.002 | -6.334 | 42.848 | 1.00 | 29.11 | C   |
| ATOM | 2950 | CG  | GLU | A | 376 | -19.509 | -7.591 | 42.165 | 1.00 | 29.86 | C   |
| ATOM | 2951 | CD  | GLU | A | 376 | -18.961 | -7.787 | 40.769 | 1.00 | 28.06 | C   |
| ATOM | 2952 | OE1 | GLU | A | 376 | -17.736 | -7.935 | 40.608 | 1.00 | 29.85 | O   |
| ATOM | 2953 | OE2 | GLU | A | 376 | -19.768 | -7.812 | 39.828 | 1.00 | 27.54 | O1- |
| ATOM | 2954 | N   | PHE | A | 377 | -18.435 | -4.748 | 39.709 | 1.00 | 21.99 | N   |
| ATOM | 2955 | CA  | PHE | A | 377 | -17.479 | -4.330 | 38.674 | 1.00 | 17.15 | C   |
| ATOM | 2956 | C   | PHE | A | 377 | -16.712 | -3.219 | 39.354 | 1.00 | 17.60 | C   |
| ATOM | 2957 | O   | PHE | A | 377 | -15.582 | -3.419 | 39.769 | 1.00 | 18.80 | O   |
| ATOM | 2958 | CB  | PHE | A | 377 | -18.158 | -3.679 | 37.448 | 1.00 | 14.09 | C   |
| ATOM | 2959 | CG  | PHE | A | 377 | -18.727 | -4.640 | 36.433 | 1.00 | 5.40  | C   |
| ATOM | 2960 | CD1 | PHE | A | 377 | -18.294 | -5.932 | 36.335 | 1.00 | 3.20  | C   |
| ATOM | 2961 | CD2 | PHE | A | 377 | -19.749 | -4.233 | 35.616 | 1.00 | 2.00  | C   |
| ATOM | 2962 | CE1 | PHE | A | 377 | -18.883 | -6.791 | 35.456 | 1.00 | 2.00  | C   |
| ATOM | 2963 | CE2 | PHE | A | 377 | -20.325 | -5.088 | 34.742 | 1.00 | 2.00  | C   |
| ATOM | 2964 | CZ  | PHE | A | 377 | -19.896 | -6.362 | 34.666 | 1.00 | 2.00  | C   |
| ATOM | 2965 | N   | LYS | A | 378 | -17.484 | -2.219 | 39.775 | 1.00 | 17.81 | N   |
| ATOM | 2966 | CA  | LYS | A | 378 | -17.005 | -0.869 | 40.084 | 1.00 | 17.26 | C   |
| ATOM | 2967 | C   | LYS | A | 378 | -15.683 | -0.699 | 40.831 | 1.00 | 15.51 | C   |
| ATOM | 2968 | O   | LYS | A | 378 | -15.089 | 0.362  | 40.777 | 1.00 | 14.50 | O   |
| ATOM | 2969 | CB  | LYS | A | 378 | -18.106 | -0.082 | 40.813 | 1.00 | 17.88 | C   |
| ATOM | 2970 | CG  | LYS | A | 378 | -17.952 | 1.453  | 40.765 | 1.00 | 18.67 | C   |
| ATOM | 2971 | CD  | LYS | A | 378 | -19.143 | 2.216  | 41.408 | 1.00 | 16.76 | C   |
| ATOM | 2972 | CE  | LYS | A | 378 | -19.247 | 2.011  | 42.921 | 1.00 | 15.54 | C   |
| ATOM | 2973 | NZ  | LYS | A | 378 | -19.884 | 0.728  | 43.329 | 1.00 | 9.93  | N1+ |
| ATOM | 2974 | N   | PRO | A | 379 | -15.161 | -1.749 | 41.468 | 1.00 | 15.24 | N   |
| ATOM | 2975 | CA  | PRO | A | 379 | -13.732 | -1.558 | 41.696 | 1.00 | 17.61 | C   |
| ATOM | 2976 | C   | PRO | A | 379 | -12.965 | -1.316 | 40.391 | 1.00 | 19.67 | C   |
| ATOM | 2977 | O   | PRO | A | 379 | -12.378 | -0.234 | 40.207 | 1.00 | 20.74 | O   |
| ATOM | 2978 | CB  | PRO | A | 379 | -13.302 | -2.852 | 42.408 | 1.00 | 17.69 | C   |
| ATOM | 2979 | CG  | PRO | A | 379 | -14.565 | -3.698 | 42.537 | 1.00 | 15.99 | C   |

|      |      |     |     |   |     |         |        |        |      |       |     |
|------|------|-----|-----|---|-----|---------|--------|--------|------|-------|-----|
| ATOM | 2980 | CD  | PRO | A | 379 | -15.707 | -2.740 | 42.404 | 1.00 | 15.75 | C   |
| ATOM | 2981 | N   | LEU | A | 380 | -13.078 | -2.261 | 39.450 | 1.00 | 18.64 | N   |
| ATOM | 2982 | CA  | LEU | A | 380 | -12.334 | -2.227 | 38.183 | 1.00 | 16.78 | C   |
| ATOM | 2983 | C   | LEU | A | 380 | -12.899 | -1.233 | 37.170 | 1.00 | 16.37 | C   |
| ATOM | 2984 | O   | LEU | A | 380 | -13.224 | -1.618 | 36.052 | 1.00 | 15.89 | O   |
| ATOM | 2985 | CB  | LEU | A | 380 | -12.274 | -3.625 | 37.545 | 1.00 | 12.95 | C   |
| ATOM | 2986 | CG  | LEU | A | 380 | -13.247 | -4.733 | 37.928 | 1.00 | 11.61 | C   |
| ATOM | 2987 | CD1 | LEU | A | 380 | -13.959 | -5.227 | 36.703 | 1.00 | 10.69 | C   |
| ATOM | 2988 | CD2 | LEU | A | 380 | -12.504 | -5.870 | 38.586 | 1.00 | 10.18 | C   |
| ATOM | 2989 | N   | VAL | A | 381 | -13.112 | 0.004  | 37.626 | 1.00 | 16.46 | N   |
| ATOM | 2990 | CA  | VAL | A | 381 | -13.610 | 1.151  | 36.844 | 1.00 | 16.90 | C   |
| ATOM | 2991 | C   | VAL | A | 381 | -13.242 | 2.411  | 37.648 | 1.00 | 17.54 | C   |
| ATOM | 2992 | O   | VAL | A | 381 | -13.279 | 3.526  | 37.143 | 1.00 | 18.24 | O   |
| ATOM | 2993 | CB  | VAL | A | 381 | -15.167 | 1.160  | 36.674 | 1.00 | 16.00 | C   |
| ATOM | 2994 | CG1 | VAL | A | 381 | -15.587 | 2.360  | 35.866 | 1.00 | 15.15 | C   |
| ATOM | 2995 | CG2 | VAL | A | 381 | -15.668 | -0.096 | 35.995 | 1.00 | 15.14 | C   |
| ATOM | 2996 | N   | GLU | A | 382 | -12.936 | 2.228  | 38.926 | 1.00 | 19.02 | N   |
| ATOM | 2997 | CA  | GLU | A | 382 | -12.424 | 3.318  | 39.744 | 1.00 | 20.65 | C   |
| ATOM | 2998 | C   | GLU | A | 382 | -10.913 | 3.520  | 39.525 | 1.00 | 19.24 | C   |
| ATOM | 2999 | O   | GLU | A | 382 | -10.503 | 4.596  | 39.114 | 1.00 | 18.63 | O   |
| ATOM | 3000 | CB  | GLU | A | 382 | -12.740 | 3.080  | 41.245 | 1.00 | 24.33 | C   |
| ATOM | 3001 | CG  | GLU | A | 382 | -14.261 | 3.175  | 41.666 | 1.00 | 22.93 | C   |
| ATOM | 3002 | CD  | GLU | A | 382 | -14.712 | 4.589  | 42.012 | 1.00 | 23.13 | C   |
| ATOM | 3003 | OE1 | GLU | A | 382 | -13.975 | 5.273  | 42.751 | 1.00 | 26.43 | O   |
| ATOM | 3004 | OE2 | GLU | A | 382 | -15.776 | 5.038  | 41.527 | 1.00 | 21.00 | O1- |
| ATOM | 3005 | N   | GLU | A | 383 | -10.115 | 2.456  | 39.602 | 1.00 | 20.27 | N   |
| ATOM | 3006 | CA  | GLU | A | 383 | -8.643  | 2.609  | 39.553 | 1.00 | 20.93 | C   |
| ATOM | 3007 | C   | GLU | A | 383 | -8.048  | 3.427  | 38.400 | 1.00 | 17.88 | C   |
| ATOM | 3008 | O   | GLU | A | 383 | -7.189  | 4.253  | 38.640 | 1.00 | 18.41 | O   |
| ATOM | 3009 | CB  | GLU | A | 383 | -7.916  | 1.246  | 39.643 | 1.00 | 24.93 | C   |
| ATOM | 3010 | CG  | GLU | A | 383 | -6.405  | 1.261  | 39.272 | 1.00 | 22.82 | C   |
| ATOM | 3011 | CD  | GLU | A | 383 | -5.485  | 1.591  | 40.440 | 1.00 | 22.48 | C   |
| ATOM | 3012 | OE1 | GLU | A | 383 | -5.574  | 2.732  | 40.956 | 1.00 | 21.74 | O   |
| ATOM | 3013 | OE2 | GLU | A | 383 | -4.621  | 0.737  | 40.781 | 1.00 | 19.05 | O1- |
| ATOM | 3014 | N   | PRO | A | 384 | -8.487  | 3.215  | 37.153 | 1.00 | 14.01 | N   |
| ATOM | 3015 | CA  | PRO | A | 384 | -8.206  | 4.228  | 36.135 | 1.00 | 15.62 | C   |
| ATOM | 3016 | C   | PRO | A | 384 | -8.687  | 5.643  | 36.491 | 1.00 | 18.77 | C   |
| ATOM | 3017 | O   | PRO | A | 384 | -7.860  | 6.487  | 36.866 | 1.00 | 20.60 | O   |
| ATOM | 3018 | CB  | PRO | A | 384 | -8.890  | 3.683  | 34.890 | 1.00 | 14.10 | C   |
| ATOM | 3019 | CG  | PRO | A | 384 | -9.622  | 2.425  | 35.353 | 1.00 | 14.48 | C   |
| ATOM | 3020 | CD  | PRO | A | 384 | -8.870  | 1.952  | 36.529 | 1.00 | 13.10 | C   |
| ATOM | 3021 | N   | GLN | A | 385 | -10.005 | 5.890  | 36.426 | 1.00 | 19.75 | N   |
| ATOM | 3022 | CA  | GLN | A | 385 | -10.623 | 7.176  | 36.806 | 1.00 | 19.44 | C   |
| ATOM | 3023 | C   | GLN | A | 385 | -9.841  | 7.869  | 37.909 | 1.00 | 19.08 | C   |
| ATOM | 3024 | O   | GLN | A | 385 | -9.943  | 9.075  | 38.105 | 1.00 | 19.58 | O   |
| ATOM | 3025 | CB  | GLN | A | 385 | -12.068 | 6.967  | 37.300 | 1.00 | 18.93 | C   |
| ATOM | 3026 | CG  | GLN | A | 385 | -13.135 | 7.054  | 36.222 | 1.00 | 22.91 | C   |
| ATOM | 3027 | CD  | GLN | A | 385 | -14.452 | 7.633  | 36.729 | 1.00 | 27.37 | C   |
| ATOM | 3028 | NE2 | GLN | A | 385 | -14.359 | 8.627  | 37.618 | 1.00 | 29.27 | N   |
| ATOM | 3029 | OE1 | GLN | A | 385 | -15.538 | 7.269  | 36.248 | 1.00 | 23.96 | O   |
| ATOM | 3030 | N   | ASN | A | 386 | -9.198  | 7.062  | 38.735 | 1.00 | 19.76 | N   |
| ATOM | 3031 | CA  | ASN | A | 386 | -8.384  | 7.586  | 39.800 | 1.00 | 22.19 | C   |
| ATOM | 3032 | C   | ASN | A | 386 | -6.935  | 7.815  | 39.379 | 1.00 | 20.96 | C   |
| ATOM | 3033 | O   | ASN | A | 386 | -6.552  | 8.967  | 39.235 | 1.00 | 20.97 | O   |
| ATOM | 3034 | CB  | ASN | A | 386 | -8.524  | 6.695  | 41.050 | 1.00 | 23.37 | C   |
| ATOM | 3035 | CG  | ASN | A | 386 | -9.864  | 6.933  | 41.789 | 1.00 | 24.44 | C   |
| ATOM | 3036 | ND2 | ASN | A | 386 | -10.081 | 8.176  | 42.227 | 1.00 | 19.73 | N   |
| ATOM | 3037 | OD1 | ASN | A | 386 | -10.734 | 6.045  | 41.845 | 1.00 | 22.44 | O   |
| ATOM | 3038 | N   | LEU | A | 387 | -6.223  | 6.749  | 38.991 | 1.00 | 20.99 | N   |
| ATOM | 3039 | CA  | LEU | A | 387 | -4.777  | 6.761  | 38.639 | 1.00 | 19.03 | C   |
| ATOM | 3040 | C   | LEU | A | 387 | -4.344  | 7.967  | 37.800 | 1.00 | 19.94 | C   |
| ATOM | 3041 | O   | LEU | A | 387 | -3.326  | 8.605  | 38.088 | 1.00 | 15.85 | O   |
| ATOM | 3042 | CB  | LEU | A | 387 | -4.387  | 5.459  | 37.888 | 1.00 | 16.60 | C   |
| ATOM | 3043 | CG  | LEU | A | 387 | -2.952  | 5.202  | 37.368 | 1.00 | 14.35 | C   |
| ATOM | 3044 | CD1 | LEU | A | 387 | -2.328  | 3.996  | 38.035 | 1.00 | 8.49  | C   |
| ATOM | 3045 | CD2 | LEU | A | 387 | -2.974  | 4.987  | 35.868 | 1.00 | 12.25 | C   |
| ATOM | 3046 | N   | ILE | A | 388 | -5.183  | 8.336  | 36.838 | 1.00 | 21.75 | N   |
| ATOM | 3047 | CA  | ILE | A | 388 | -4.984  | 9.544  | 36.034 | 1.00 | 24.55 | C   |
| ATOM | 3048 | C   | ILE | A | 388 | -5.094  | 10.847 | 36.880 | 1.00 | 26.81 | C   |
| ATOM | 3049 | O   | ILE | A | 388 | -5.268  | 11.943 | 36.341 | 1.00 | 26.63 | O   |
| ATOM | 3050 | CB  | ILE | A | 388 | -6.000  | 9.592  | 34.822 | 1.00 | 22.71 | C   |

|      |      |     |     |   |     |        |        |        |      |       |     |
|------|------|-----|-----|---|-----|--------|--------|--------|------|-------|-----|
| ATOM | 3051 | CG1 | ILE | A | 388 | -6.237 | 8.196  | 34.243 | 1.00 | 18.19 | C   |
| ATOM | 3052 | CG2 | ILE | A | 388 | -5.417 | 10.407 | 33.692 | 1.00 | 22.80 | C   |
| ATOM | 3053 | CD1 | ILE | A | 388 | -4.998 | 7.574  | 33.621 | 1.00 | 16.41 | C   |
| ATOM | 3054 | N   | LYS | A | 389 | -5.028 | 10.699 | 38.205 | 1.00 | 29.41 | N   |
| ATOM | 3055 | CA  | LYS | A | 389 | -4.770 | 11.788 | 39.136 | 1.00 | 30.13 | C   |
| ATOM | 3056 | C   | LYS | A | 389 | -3.251 | 11.818 | 39.376 | 1.00 | 30.26 | C   |
| ATOM | 3057 | O   | LYS | A | 389 | -2.558 | 12.722 | 38.899 | 1.00 | 30.98 | O   |
| ATOM | 3058 | CB  | LYS | A | 389 | -5.517 | 11.556 | 40.468 | 1.00 | 33.95 | C   |
| ATOM | 3059 | CG  | LYS | A | 389 | -5.040 | 12.458 | 41.657 | 1.00 | 35.82 | C   |
| ATOM | 3060 | CD  | LYS | A | 389 | -5.674 | 12.085 | 43.010 | 1.00 | 34.70 | C   |
| ATOM | 3061 | CE  | LYS | A | 389 | -6.883 | 12.973 | 43.356 | 1.00 | 35.61 | C   |
| ATOM | 3062 | NZ  | LYS | A | 389 | -8.212 | 12.441 | 42.868 | 1.00 | 33.54 | N1+ |
| ATOM | 3063 | N   | GLN | A | 390 | -2.709 | 10.787 | 40.017 | 1.00 | 29.25 | N   |
| ATOM | 3064 | CA  | GLN | A | 390 | -1.259 | 10.707 | 40.162 | 1.00 | 28.68 | C   |
| ATOM | 3065 | C   | GLN | A | 390 | -0.642 | 10.117 | 38.874 | 1.00 | 27.03 | C   |
| ATOM | 3066 | O   | GLN | A | 390 | 0.333  | 9.360  | 38.911 | 1.00 | 26.91 | O   |
| ATOM | 3067 | CB  | GLN | A | 390 | -0.882 | 9.887  | 41.406 | 1.00 | 29.73 | C   |
| ATOM | 3068 | CG  | GLN | A | 390 | 0.416  | 10.334 | 42.107 | 1.00 | 28.58 | C   |
| ATOM | 3069 | CD  | GLN | A | 390 | 0.193  | 11.454 | 43.108 | 1.00 | 29.76 | C   |
| ATOM | 3070 | NE2 | GLN | A | 390 | -0.114 | 11.089 | 44.353 | 1.00 | 30.78 | N   |
| ATOM | 3071 | OE1 | GLN | A | 390 | 0.315  | 12.635 | 42.775 | 1.00 | 30.93 | O   |
| ATOM | 3072 | N   | ASN | A | 391 | -1.358 | 10.288 | 37.772 | 1.00 | 24.04 | N   |
| ATOM | 3073 | CA  | ASN | A | 391 | -0.718 | 10.582 | 36.515 | 1.00 | 22.15 | C   |
| ATOM | 3074 | C   | ASN | A | 391 | -0.857 | 12.091 | 36.495 | 1.00 | 18.92 | C   |
| ATOM | 3075 | O   | ASN | A | 391 | -0.065 | 12.773 | 37.132 | 1.00 | 18.87 | O   |
| ATOM | 3076 | CB  | ASN | A | 391 | -1.487 | 9.959  | 35.334 | 1.00 | 28.55 | C   |
| ATOM | 3077 | CG  | ASN | A | 391 | -0.680 | 8.877  | 34.571 | 1.00 | 33.87 | C   |
| ATOM | 3078 | ND2 | ASN | A | 391 | 0.535  | 8.555  | 35.050 | 1.00 | 36.03 | N   |
| ATOM | 3079 | OD1 | ASN | A | 391 | -1.189 | 8.289  | 33.605 | 1.00 | 33.57 | O   |
| ATOM | 3080 | N   | CYS | A | 392 | -2.048 | 12.556 | 36.135 | 1.00 | 16.20 | N   |
| ATOM | 3081 | CA  | CYS | A | 392 | -2.222 | 13.923 | 35.670 | 1.00 | 13.67 | C   |
| ATOM | 3082 | C   | CYS | A | 392 | -2.326 | 14.985 | 36.745 | 1.00 | 13.13 | C   |
| ATOM | 3083 | O   | CYS | A | 392 | -2.971 | 16.008 | 36.549 | 1.00 | 15.19 | O   |
| ATOM | 3084 | CB  | CYS | A | 392 | -3.420 | 14.004 | 34.730 | 1.00 | 11.64 | C   |
| ATOM | 3085 | SG  | CYS | A | 392 | -3.165 | 13.048 | 33.210 | 1.00 | 12.44 | S   |
| ATOM | 3086 | N   | GLU | A | 393 | -1.503 | 14.864 | 37.768 | 1.00 | 14.75 | N   |
| ATOM | 3087 | CA  | GLU | A | 393 | -1.268 | 16.000 | 38.653 | 1.00 | 19.49 | C   |
| ATOM | 3088 | C   | GLU | A | 393 | 0.227  | 16.228 | 38.975 | 1.00 | 20.11 | C   |
| ATOM | 3089 | O   | GLU | A | 393 | 0.754  | 17.335 | 38.787 | 1.00 | 18.94 | O   |
| ATOM | 3090 | CB  | GLU | A | 393 | -2.081 | 15.840 | 39.940 | 1.00 | 20.40 | C   |
| ATOM | 3091 | CG  | GLU | A | 393 | -2.403 | 17.152 | 40.613 | 1.00 | 20.82 | C   |
| ATOM | 3092 | CD  | GLU | A | 393 | -3.414 | 16.997 | 41.713 | 1.00 | 22.54 | C   |
| ATOM | 3093 | OE1 | GLU | A | 393 | -3.048 | 16.456 | 42.785 | 1.00 | 24.39 | O   |
| ATOM | 3094 | OE2 | GLU | A | 393 | -4.574 | 17.418 | 41.505 | 1.00 | 24.30 | O1- |
| ATOM | 3095 | N   | LEU | A | 394 | 0.908  | 15.165 | 39.396 | 1.00 | 19.67 | N   |
| ATOM | 3096 | CA  | LEU | A | 394 | 2.353  | 15.160 | 39.518 | 1.00 | 21.83 | C   |
| ATOM | 3097 | C   | LEU | A | 394 | 2.947  | 15.795 | 38.259 | 1.00 | 24.26 | C   |
| ATOM | 3098 | O   | LEU | A | 394 | 3.959  | 16.503 | 38.286 | 1.00 | 26.00 | O   |
| ATOM | 3099 | CB  | LEU | A | 394 | 2.839  | 13.722 | 39.646 | 1.00 | 21.88 | C   |
| ATOM | 3100 | CG  | LEU | A | 394 | 4.062  | 13.487 | 40.531 | 1.00 | 23.92 | C   |
| ATOM | 3101 | CD1 | LEU | A | 394 | 5.242  | 14.340 | 40.026 | 1.00 | 25.67 | C   |
| ATOM | 3102 | CD2 | LEU | A | 394 | 3.724  | 13.789 | 41.997 | 1.00 | 21.11 | C   |
| ATOM | 3103 | N   | PHE | A | 395 | 2.277  | 15.598 | 37.142 | 1.00 | 25.37 | N   |
| ATOM | 3104 | CA  | PHE | A | 395 | 2.708  | 16.304 | 35.965 | 1.00 | 25.77 | C   |
| ATOM | 3105 | C   | PHE | A | 395 | 2.196  | 17.746 | 35.907 | 1.00 | 26.16 | C   |
| ATOM | 3106 | O   | PHE | A | 395 | 2.988  | 18.663 | 36.144 | 1.00 | 26.53 | O   |
| ATOM | 3107 | CB  | PHE | A | 395 | 2.361  | 15.469 | 34.744 | 1.00 | 25.66 | C   |
| ATOM | 3108 | CG  | PHE | A | 395 | 3.224  | 14.254 | 34.625 | 1.00 | 26.69 | C   |
| ATOM | 3109 | CD1 | PHE | A | 395 | 4.603  | 14.367 | 34.780 | 1.00 | 26.93 | C   |
| ATOM | 3110 | CD2 | PHE | A | 395 | 2.676  | 13.000 | 34.460 | 1.00 | 26.92 | C   |
| ATOM | 3111 | CE1 | PHE | A | 395 | 5.417  | 13.264 | 34.773 | 1.00 | 25.90 | C   |
| ATOM | 3112 | CE2 | PHE | A | 395 | 3.487  | 11.886 | 34.451 | 1.00 | 29.35 | C   |
| ATOM | 3113 | CZ  | PHE | A | 395 | 4.867  | 12.022 | 34.609 | 1.00 | 28.67 | C   |
| ATOM | 3114 | N   | GLU | A | 396 | 0.868  | 17.902 | 35.930 | 1.00 | 24.62 | N   |
| ATOM | 3115 | CA  | GLU | A | 396 | 0.191  | 19.186 | 35.745 | 1.00 | 22.66 | C   |
| ATOM | 3116 | C   | GLU | A | 396 | 0.982  | 20.346 | 36.329 | 1.00 | 24.98 | C   |
| ATOM | 3117 | O   | GLU | A | 396 | 1.905  | 20.842 | 35.684 | 1.00 | 25.79 | O   |
| ATOM | 3118 | CB  | GLU | A | 396 | -1.209 | 19.129 | 36.363 | 1.00 | 21.41 | C   |
| ATOM | 3119 | CG  | GLU | A | 396 | -2.062 | 20.342 | 36.075 | 1.00 | 18.86 | C   |
| ATOM | 3120 | CD  | GLU | A | 396 | -3.511 | 20.135 | 36.448 | 1.00 | 19.66 | C   |
| ATOM | 3121 | OE1 | GLU | A | 396 | -4.119 | 19.159 | 35.965 | 1.00 | 21.53 | O   |

|      |      |     |     |   |     |        |        |        |      |       |     |
|------|------|-----|-----|---|-----|--------|--------|--------|------|-------|-----|
| ATOM | 3122 | OE2 | GLU | A | 396 | -4.056 | 20.951 | 37.210 | 1.00 | 16.14 | O1- |
| ATOM | 3123 | N   | GLN | A | 397 | 0.686  | 20.717 | 37.577 | 1.00 | 28.23 | N   |
| ATOM | 3124 | CA  | GLN | A | 397 | 1.460  | 21.738 | 38.288 | 1.00 | 27.32 | C   |
| ATOM | 3125 | C   | GLN | A | 397 | 2.530  | 20.945 | 38.997 | 1.00 | 25.36 | C   |
| ATOM | 3126 | O   | GLN | A | 397 | 2.351  | 20.612 | 40.158 | 1.00 | 22.92 | O   |
| ATOM | 3127 | CB  | GLN | A | 397 | 0.595  | 22.527 | 39.326 | 1.00 | 28.36 | C   |
| ATOM | 3128 | CG  | GLN | A | 397 | 1.354  | 23.682 | 40.097 | 1.00 | 26.26 | C   |
| ATOM | 3129 | CD  | GLN | A | 397 | 0.487  | 24.528 | 41.064 | 1.00 | 25.26 | C   |
| ATOM | 3130 | NE2 | GLN | A | 397 | -0.812 | 24.290 | 41.070 | 1.00 | 27.07 | N   |
| ATOM | 3131 | OE1 | GLN | A | 397 | 1.011  | 25.332 | 41.847 | 1.00 | 24.51 | O   |
| ATOM | 3132 | N   | LEU | A | 398 | 3.461  | 20.405 | 38.210 | 1.00 | 25.94 | N   |
| ATOM | 3133 | CA  | LEU | A | 398 | 4.677  | 19.792 | 38.751 | 1.00 | 26.57 | C   |
| ATOM | 3134 | C   | LEU | A | 398 | 5.577  | 19.106 | 37.699 | 1.00 | 24.32 | C   |
| ATOM | 3135 | O   | LEU | A | 398 | 6.460  | 18.340 | 38.071 | 1.00 | 22.18 | O   |
| ATOM | 3136 | CB  | LEU | A | 398 | 4.328  | 18.793 | 39.899 | 1.00 | 29.28 | C   |
| ATOM | 3137 | CG  | LEU | A | 398 | 4.839  | 18.900 | 41.365 | 1.00 | 29.60 | C   |
| ATOM | 3138 | CD1 | LEU | A | 398 | 4.218  | 20.072 | 42.135 | 1.00 | 29.70 | C   |
| ATOM | 3139 | CD2 | LEU | A | 398 | 4.513  | 17.604 | 42.113 | 1.00 | 27.39 | C   |
| ATOM | 3140 | N   | GLY | A | 399 | 5.407  | 19.409 | 36.409 | 1.00 | 24.36 | N   |
| ATOM | 3141 | CA  | GLY | A | 399 | 6.447  | 19.039 | 35.442 | 1.00 | 26.34 | C   |
| ATOM | 3142 | C   | GLY | A | 399 | 6.243  | 18.217 | 34.146 | 1.00 | 25.35 | C   |
| ATOM | 3143 | O   | GLY | A | 399 | 6.431  | 16.983 | 34.105 | 1.00 | 24.71 | O   |
| ATOM | 3144 | N   | GLU | A | 400 | 6.272  | 18.954 | 33.041 | 1.00 | 23.31 | N   |
| ATOM | 3145 | CA  | GLU | A | 400 | 6.309  | 18.381 | 31.700 | 1.00 | 21.85 | C   |
| ATOM | 3146 | C   | GLU | A | 400 | 7.499  | 17.394 | 31.494 | 1.00 | 21.88 | C   |
| ATOM | 3147 | O   | GLU | A | 400 | 7.351  | 16.186 | 31.628 | 1.00 | 20.25 | O   |
| ATOM | 3148 | CB  | GLU | A | 400 | 6.389  | 19.544 | 30.704 | 1.00 | 18.99 | C   |
| ATOM | 3149 | CG  | GLU | A | 400 | 5.051  | 20.164 | 30.301 | 1.00 | 18.80 | C   |
| ATOM | 3150 | CD  | GLU | A | 400 | 4.368  | 21.016 | 31.372 | 1.00 | 15.88 | C   |
| ATOM | 3151 | OE1 | GLU | A | 400 | 4.576  | 20.786 | 32.574 | 1.00 | 13.73 | O   |
| ATOM | 3152 | OE2 | GLU | A | 400 | 3.524  | 21.862 | 30.999 | 1.00 | 14.44 | O1- |
| ATOM | 3153 | N   | TYR | A | 401 | 8.701  | 17.951 | 31.356 | 1.00 | 22.47 | N   |
| ATOM | 3154 | CA  | TYR | A | 401 | 9.926  | 17.216 | 31.020 | 1.00 | 20.38 | C   |
| ATOM | 3155 | C   | TYR | A | 401 | 10.935 | 17.239 | 32.181 | 1.00 | 19.52 | C   |
| ATOM | 3156 | O   | TYR | A | 401 | 12.064 | 16.790 | 32.033 | 1.00 | 18.53 | O   |
| ATOM | 3157 | CB  | TYR | A | 401 | 10.554 | 17.881 | 29.797 | 1.00 | 23.78 | C   |
| ATOM | 3158 | CG  | TYR | A | 401 | 11.448 | 16.997 | 28.969 | 1.00 | 25.15 | C   |
| ATOM | 3159 | CD1 | TYR | A | 401 | 12.748 | 16.752 | 29.363 | 1.00 | 25.90 | C   |
| ATOM | 3160 | CD2 | TYR | A | 401 | 11.060 | 16.579 | 27.706 | 1.00 | 25.00 | C   |
| ATOM | 3161 | CE1 | TYR | A | 401 | 13.641 | 16.158 | 28.525 | 1.00 | 27.01 | C   |
| ATOM | 3162 | CE2 | TYR | A | 401 | 11.948 | 15.979 | 26.863 | 1.00 | 26.20 | C   |
| ATOM | 3163 | CZ  | TYR | A | 401 | 13.250 | 15.790 | 27.270 | 1.00 | 26.58 | C   |
| ATOM | 3164 | OH  | TYR | A | 401 | 14.209 | 15.388 | 26.375 | 1.00 | 22.64 | O   |
| ATOM | 3165 | N   | LYS | A | 402 | 10.621 | 18.021 | 33.211 | 1.00 | 22.60 | N   |
| ATOM | 3166 | CA  | LYS | A | 402 | 11.307 | 17.936 | 34.503 | 1.00 | 22.71 | C   |
| ATOM | 3167 | C   | LYS | A | 402 | 10.981 | 16.574 | 35.103 | 1.00 | 24.22 | C   |
| ATOM | 3168 | O   | LYS | A | 402 | 11.543 | 15.565 | 34.676 | 1.00 | 25.37 | O   |
| ATOM | 3169 | CB  | LYS | A | 402 | 10.845 | 19.067 | 35.435 | 1.00 | 20.39 | C   |
| ATOM | 3170 | CG  | LYS | A | 402 | 11.323 | 18.957 | 36.876 | 1.00 | 17.50 | C   |
| ATOM | 3171 | CD  | LYS | A | 402 | 12.633 | 19.686 | 37.105 | 1.00 | 17.85 | C   |
| ATOM | 3172 | CE  | LYS | A | 402 | 13.838 | 18.750 | 37.135 | 1.00 | 17.83 | C   |
| ATOM | 3173 | NZ  | LYS | A | 402 | 15.068 | 19.486 | 37.556 | 1.00 | 19.64 | N1+ |
| ATOM | 3174 | N   | PHE | A | 403 | 9.954  | 16.495 | 35.941 | 1.00 | 25.18 | N   |
| ATOM | 3175 | CA  | PHE | A | 403 | 9.679  | 15.217 | 36.562 | 1.00 | 28.48 | C   |
| ATOM | 3176 | C   | PHE | A | 403 | 8.640  | 14.362 | 35.850 | 1.00 | 30.15 | C   |
| ATOM | 3177 | O   | PHE | A | 403 | 7.621  | 13.986 | 36.423 | 1.00 | 30.31 | O   |
| ATOM | 3178 | CB  | PHE | A | 403 | 9.370  | 15.398 | 38.045 | 1.00 | 28.85 | C   |
| ATOM | 3179 | CG  | PHE | A | 403 | 10.610 | 15.601 | 38.886 | 1.00 | 30.05 | C   |
| ATOM | 3180 | CD1 | PHE | A | 403 | 11.155 | 16.860 | 39.037 | 1.00 | 28.78 | C   |
| ATOM | 3181 | CD2 | PHE | A | 403 | 11.326 | 14.511 | 39.371 | 1.00 | 29.76 | C   |
| ATOM | 3182 | CE1 | PHE | A | 403 | 12.393 | 17.026 | 39.632 | 1.00 | 28.52 | C   |
| ATOM | 3183 | CE2 | PHE | A | 403 | 12.561 | 14.677 | 39.967 | 1.00 | 26.34 | C   |
| ATOM | 3184 | CZ  | PHE | A | 403 | 13.097 | 15.928 | 40.092 | 1.00 | 26.88 | C   |
| ATOM | 3185 | N   | GLN | A | 404 | 8.911  | 14.106 | 34.565 | 1.00 | 32.37 | N   |
| ATOM | 3186 | CA  | GLN | A | 404 | 8.532  | 12.852 | 33.887 | 1.00 | 30.49 | C   |
| ATOM | 3187 | C   | GLN | A | 404 | 9.506  | 11.781 | 34.350 | 1.00 | 29.27 | C   |
| ATOM | 3188 | O   | GLN | A | 404 | 9.194  | 10.601 | 34.304 | 1.00 | 29.71 | O   |
| ATOM | 3189 | CB  | GLN | A | 404 | 8.648  | 12.975 | 32.361 | 1.00 | 31.75 | C   |
| ATOM | 3190 | CG  | GLN | A | 404 | 10.038 | 12.639 | 31.796 | 1.00 | 30.57 | C   |
| ATOM | 3191 | CD  | GLN | A | 404 | 10.134 | 12.873 | 30.298 | 1.00 | 31.42 | C   |
| ATOM | 3192 | NE2 | GLN | A | 404 | 9.715  | 11.891 | 29.507 | 1.00 | 30.06 | N   |

|      |      |     |     |   |     |        |        |        |      |       |     |
|------|------|-----|-----|---|-----|--------|--------|--------|------|-------|-----|
| ATOM | 3193 | OE1 | GLN | A | 404 | 10.548 | 13.942 | 29.858 | 1.00 | 31.82 | O   |
| ATOM | 3194 | N   | ASN | A | 405 | 10.695 | 12.196 | 34.786 | 1.00 | 27.19 | N   |
| ATOM | 3195 | CA  | ASN | A | 405 | 11.561 | 11.290 | 35.527 | 1.00 | 24.01 | C   |
| ATOM | 3196 | C   | ASN | A | 405 | 11.159 | 11.181 | 37.030 | 1.00 | 21.70 | C   |
| ATOM | 3197 | O   | ASN | A | 405 | 11.983 | 11.211 | 37.946 | 1.00 | 15.16 | O   |
| ATOM | 3198 | CB  | ASN | A | 405 | 13.033 | 11.663 | 35.278 | 1.00 | 22.91 | C   |
| ATOM | 3199 | CG  | ASN | A | 405 | 13.611 | 12.577 | 36.314 | 1.00 | 19.47 | C   |
| ATOM | 3200 | ND2 | ASN | A | 405 | 13.058 | 13.770 | 36.427 | 1.00 | 19.73 | N   |
| ATOM | 3201 | OD1 | ASN | A | 405 | 14.666 | 12.283 | 36.866 | 1.00 | 17.07 | O   |
| ATOM | 3202 | N   | ALA | A | 406 | 9.852  | 10.999 | 37.231 | 1.00 | 19.67 | N   |
| ATOM | 3203 | CA  | ALA | A | 406 | 9.294  | 10.467 | 38.458 | 1.00 | 18.79 | C   |
| ATOM | 3204 | C   | ALA | A | 406 | 8.941  | 9.011  | 38.194 | 1.00 | 20.96 | C   |
| ATOM | 3205 | O   | ALA | A | 406 | 9.168  | 8.141  | 39.044 | 1.00 | 23.15 | O   |
| ATOM | 3206 | CB  | ALA | A | 406 | 8.048  | 11.228 | 38.841 | 1.00 | 15.73 | C   |
| ATOM | 3207 | N   | LEU | A | 407 | 8.393  | 8.731  | 37.013 | 1.00 | 19.76 | N   |
| ATOM | 3208 | CA  | LEU | A | 407 | 7.955  | 7.379  | 36.692 | 1.00 | 16.89 | C   |
| ATOM | 3209 | C   | LEU | A | 407 | 9.136  | 6.433  | 36.519 | 1.00 | 17.14 | C   |
| ATOM | 3210 | O   | LEU | A | 407 | 8.978  | 5.221  | 36.655 | 1.00 | 15.99 | O   |
| ATOM | 3211 | CB  | LEU | A | 407 | 7.086  | 7.393  | 35.444 | 1.00 | 16.01 | C   |
| ATOM | 3212 | CG  | LEU | A | 407 | 5.659  | 7.835  | 35.763 | 1.00 | 18.48 | C   |
| ATOM | 3213 | CD1 | LEU | A | 407 | 4.978  | 8.430  | 34.540 | 1.00 | 20.67 | C   |
| ATOM | 3214 | CD2 | LEU | A | 407 | 4.871  | 6.641  | 36.285 | 1.00 | 20.49 | C   |
| ATOM | 3215 | N   | LEU | A | 408 | 10.317 | 6.998  | 36.250 | 1.00 | 18.02 | N   |
| ATOM | 3216 | CA  | LEU | A | 408 | 11.617 | 6.307  | 36.411 | 1.00 | 18.24 | C   |
| ATOM | 3217 | C   | LEU | A | 408 | 11.824 | 5.869  | 37.872 | 1.00 | 18.70 | C   |
| ATOM | 3218 | O   | LEU | A | 408 | 11.811 | 4.687  | 38.190 | 1.00 | 17.33 | O   |
| ATOM | 3219 | CB  | LEU | A | 408 | 12.767 | 7.250  | 36.018 | 1.00 | 18.19 | C   |
| ATOM | 3220 | CG  | LEU | A | 408 | 13.659 | 7.027  | 34.797 | 1.00 | 16.19 | C   |
| ATOM | 3221 | CD1 | LEU | A | 408 | 14.511 | 8.259  | 34.575 | 1.00 | 11.96 | C   |
| ATOM | 3222 | CD2 | LEU | A | 408 | 14.539 | 5.807  | 34.995 | 1.00 | 16.05 | C   |
| ATOM | 3223 | N   | VAL | A | 409 | 11.989 | 6.846  | 38.759 | 1.00 | 20.54 | N   |
| ATOM | 3224 | CA  | VAL | A | 409 | 12.091 | 6.603  | 40.193 | 1.00 | 20.69 | C   |
| ATOM | 3225 | C   | VAL | A | 409 | 11.118 | 5.538  | 40.642 | 1.00 | 21.47 | C   |
| ATOM | 3226 | O   | VAL | A | 409 | 11.487 | 4.672  | 41.418 | 1.00 | 23.58 | O   |
| ATOM | 3227 | CB  | VAL | A | 409 | 11.797 | 7.867  | 41.012 | 1.00 | 19.59 | C   |
| ATOM | 3228 | CG1 | VAL | A | 409 | 11.897 | 7.549  | 42.518 | 1.00 | 19.23 | C   |
| ATOM | 3229 | CG2 | VAL | A | 409 | 12.753 | 8.975  | 40.613 | 1.00 | 17.46 | C   |
| ATOM | 3230 | N   | ARG | A | 410 | 9.879  | 5.610  | 40.163 | 1.00 | 21.93 | N   |
| ATOM | 3231 | CA  | ARG | A | 410 | 8.889  | 4.593  | 40.488 | 1.00 | 21.95 | C   |
| ATOM | 3232 | C   | ARG | A | 410 | 9.369  | 3.263  | 39.930 | 1.00 | 21.48 | C   |
| ATOM | 3233 | O   | ARG | A | 410 | 9.723  | 2.363  | 40.692 | 1.00 | 24.94 | O   |
| ATOM | 3234 | CB  | ARG | A | 410 | 7.506  | 4.939  | 39.904 | 1.00 | 22.67 | C   |
| ATOM | 3235 | CG  | ARG | A | 410 | 6.846  | 6.205  | 40.445 | 1.00 | 20.28 | C   |
| ATOM | 3236 | CD  | ARG | A | 410 | 5.357  | 6.220  | 40.114 | 1.00 | 20.80 | C   |
| ATOM | 3237 | NE  | ARG | A | 410 | 4.733  | 7.522  | 40.365 | 1.00 | 20.80 | N   |
| ATOM | 3238 | CZ  | ARG | A | 410 | 3.487  | 7.841  | 40.011 | 1.00 | 20.59 | C   |
| ATOM | 3239 | NH1 | ARG | A | 410 | 2.705  | 6.941  | 39.426 | 1.00 | 21.04 | N1+ |
| ATOM | 3240 | NH2 | ARG | A | 410 | 3.025  | 9.067  | 40.234 | 1.00 | 20.07 | N   |
| ATOM | 3241 | N   | TYR | A | 411 | 9.529  | 3.186  | 38.615 | 1.00 | 18.76 | N   |
| ATOM | 3242 | CA  | TYR | A | 411 | 9.792  | 1.907  | 37.974 | 1.00 | 17.50 | C   |
| ATOM | 3243 | C   | TYR | A | 411 | 11.169 | 1.356  | 38.330 | 1.00 | 17.38 | C   |
| ATOM | 3244 | O   | TYR | A | 411 | 11.289 | 0.240  | 38.823 | 1.00 | 15.90 | O   |
| ATOM | 3245 | CB  | TYR | A | 411 | 9.606  | 2.024  | 36.453 | 1.00 | 18.41 | C   |
| ATOM | 3246 | CG  | TYR | A | 411 | 8.151  | 1.974  | 36.064 | 1.00 | 17.19 | C   |
| ATOM | 3247 | CD1 | TYR | A | 411 | 7.215  | 2.657  | 36.815 | 1.00 | 15.09 | C   |
| ATOM | 3248 | CD2 | TYR | A | 411 | 7.684  | 1.060  | 35.137 | 1.00 | 18.38 | C   |
| ATOM | 3249 | CE1 | TYR | A | 411 | 5.885  | 2.431  | 36.681 | 1.00 | 11.66 | C   |
| ATOM | 3250 | CE2 | TYR | A | 411 | 6.325  | 0.829  | 34.998 | 1.00 | 15.51 | C   |
| ATOM | 3251 | CZ  | TYR | A | 411 | 5.436  | 1.536  | 35.776 | 1.00 | 12.43 | C   |
| ATOM | 3252 | OH  | TYR | A | 411 | 4.079  | 1.476  | 35.573 | 1.00 | 16.59 | O   |
| ATOM | 3253 | N   | THR | A | 412 | 12.186 | 2.195  | 38.234 | 1.00 | 19.91 | N   |
| ATOM | 3254 | CA  | THR | A | 412 | 13.541 | 1.791  | 38.601 | 1.00 | 24.09 | C   |
| ATOM | 3255 | C   | THR | A | 412 | 13.591 | 1.176  | 39.988 | 1.00 | 23.32 | C   |
| ATOM | 3256 | O   | THR | A | 412 | 14.583 | 0.526  | 40.342 | 1.00 | 22.82 | O   |
| ATOM | 3257 | CB  | THR | A | 412 | 14.510 | 2.978  | 38.590 | 1.00 | 26.90 | C   |
| ATOM | 3258 | CG2 | THR | A | 412 | 15.900 | 2.514  | 38.214 | 1.00 | 29.28 | C   |
| ATOM | 3259 | OG1 | THR | A | 412 | 14.063 | 3.952  | 37.634 | 1.00 | 31.00 | O   |
| ATOM | 3260 | N   | LYS | A | 413 | 12.580 | 1.492  | 40.802 | 1.00 | 21.28 | N   |
| ATOM | 3261 | CA  | LYS | A | 413 | 12.512 | 1.006  | 42.170 | 1.00 | 19.27 | C   |
| ATOM | 3262 | C   | LYS | A | 413 | 11.796 | -0.322 | 42.158 | 1.00 | 19.80 | C   |
| ATOM | 3263 | O   | LYS | A | 413 | 12.418 | -1.382 | 42.340 | 1.00 | 20.91 | O   |



|      |      |     |     |   |     |        |        |        |      |       |     |
|------|------|-----|-----|---|-----|--------|--------|--------|------|-------|-----|
| ATOM | 3264 | CB  | LYS | A | 413 | 11.768 | 1.999  | 43.068 | 1.00 | 16.46 | C   |
| ATOM | 3265 | CG  | LYS | A | 413 | 12.670 | 2.713  | 44.084 | 1.00 | 17.32 | C   |
| ATOM | 3266 | CD  | LYS | A | 413 | 11.899 | 3.127  | 45.323 | 1.00 | 18.80 | C   |
| ATOM | 3267 | CE  | LYS | A | 413 | 11.409 | 4.570  | 45.242 | 1.00 | 21.30 | C   |
| ATOM | 3268 | NZ  | LYS | A | 413 | 12.515 | 5.551  | 45.015 | 1.00 | 20.06 | N1+ |
| ATOM | 3269 | N   | LYS | A | 414 | 10.531 | -0.282 | 41.752 | 1.00 | 18.33 | N   |
| ATOM | 3270 | CA  | LYS | A | 414 | 9.678  | -1.445 | 41.909 | 1.00 | 16.94 | C   |
| ATOM | 3271 | C   | LYS | A | 414 | 10.083 | -2.597 | 41.015 | 1.00 | 17.20 | C   |
| ATOM | 3272 | O   | LYS | A | 414 | 9.744  | -3.742 | 41.285 | 1.00 | 17.03 | O   |
| ATOM | 3273 | CB  | LYS | A | 414 | 8.192  | -1.098 | 41.704 | 1.00 | 17.27 | C   |
| ATOM | 3274 | CG  | LYS | A | 414 | 7.823  | -0.088 | 40.645 | 1.00 | 12.68 | C   |
| ATOM | 3275 | CD  | LYS | A | 414 | 6.341  | -0.276 | 40.311 | 1.00 | 14.55 | C   |
| ATOM | 3276 | CE  | LYS | A | 414 | 5.798  | 0.739  | 39.303 | 1.00 | 14.56 | C   |
| ATOM | 3277 | NZ  | LYS | A | 414 | 5.337  | 2.037  | 39.917 | 1.00 | 14.02 | N1+ |
| ATOM | 3278 | N   | VAL | A | 415 | 10.934 | -2.302 | 40.043 | 1.00 | 17.01 | N   |
| ATOM | 3279 | CA  | VAL | A | 415 | 11.369 | -3.287 | 39.070 | 1.00 | 16.75 | C   |
| ATOM | 3280 | C   | VAL | A | 415 | 12.780 | -2.914 | 38.581 | 1.00 | 21.86 | C   |
| ATOM | 3281 | O   | VAL | A | 415 | 12.949 | -2.362 | 37.490 | 1.00 | 23.99 | O   |
| ATOM | 3282 | CB  | VAL | A | 415 | 10.373 | -3.353 | 37.897 | 1.00 | 12.19 | C   |
| ATOM | 3283 | CG1 | VAL | A | 415 | 10.301 | -2.032 | 37.199 | 1.00 | 10.88 | C   |
| ATOM | 3284 | CG2 | VAL | A | 415 | 10.754 | -4.432 | 36.947 | 1.00 | 9.96  | C   |
| ATOM | 3285 | N   | PRO | A | 416 | 13.817 | -3.194 | 39.401 | 1.00 | 23.73 | N   |
| ATOM | 3286 | CA  | PRO | A | 416 | 15.121 | -2.556 | 39.239 | 1.00 | 23.14 | C   |
| ATOM | 3287 | C   | PRO | A | 416 | 16.129 | -3.485 | 38.583 | 1.00 | 22.45 | C   |
| ATOM | 3288 | O   | PRO | A | 416 | 17.310 | -3.467 | 38.920 | 1.00 | 20.59 | O   |
| ATOM | 3289 | CB  | PRO | A | 416 | 15.513 | -2.221 | 40.679 | 1.00 | 26.64 | C   |
| ATOM | 3290 | CG  | PRO | A | 416 | 14.755 | -3.262 | 41.552 | 1.00 | 24.34 | C   |
| ATOM | 3291 | CD  | PRO | A | 416 | 13.777 | -3.984 | 40.645 | 1.00 | 25.02 | C   |
| ATOM | 3292 | N   | GLN | A | 417 | 15.653 | -4.338 | 37.686 | 1.00 | 24.78 | N   |
| ATOM | 3293 | CA  | GLN | A | 417 | 16.554 | -5.178 | 36.894 | 1.00 | 25.39 | C   |
| ATOM | 3294 | C   | GLN | A | 417 | 16.386 | -5.115 | 35.367 | 1.00 | 25.68 | C   |
| ATOM | 3295 | O   | GLN | A | 417 | 17.256 | -5.608 | 34.646 | 1.00 | 28.59 | O   |
| ATOM | 3296 | CB  | GLN | A | 417 | 16.476 | -6.640 | 37.343 | 1.00 | 22.92 | C   |
| ATOM | 3297 | CG  | GLN | A | 417 | 17.445 | -6.998 | 38.437 | 1.00 | 16.76 | C   |
| ATOM | 3298 | CD  | GLN | A | 417 | 16.729 | -7.293 | 39.727 | 1.00 | 19.80 | C   |
| ATOM | 3299 | NE2 | GLN | A | 417 | 17.337 | -8.118 | 40.561 | 1.00 | 17.72 | N   |
| ATOM | 3300 | OE1 | GLN | A | 417 | 15.618 | -6.796 | 39.965 | 1.00 | 20.09 | O   |
| ATOM | 3301 | N   | VAL | A | 418 | 15.284 | -4.562 | 34.862 | 1.00 | 23.83 | N   |
| ATOM | 3302 | CA  | VAL | A | 418 | 15.206 | -4.262 | 33.420 | 1.00 | 25.79 | C   |
| ATOM | 3303 | C   | VAL | A | 418 | 16.443 | -3.398 | 33.023 | 1.00 | 25.27 | C   |
| ATOM | 3304 | O   | VAL | A | 418 | 17.075 | -2.784 | 33.886 | 1.00 | 26.72 | O   |
| ATOM | 3305 | CB  | VAL | A | 418 | 13.872 | -3.506 | 33.057 | 1.00 | 24.98 | C   |
| ATOM | 3306 | CG1 | VAL | A | 418 | 13.516 | -3.697 | 31.597 | 1.00 | 21.82 | C   |
| ATOM | 3307 | CG2 | VAL | A | 418 | 12.720 | -4.010 | 33.907 | 1.00 | 25.57 | C   |
| ATOM | 3308 | N   | SER | A | 419 | 16.865 | -3.451 | 31.761 | 1.00 | 23.89 | N   |
| ATOM | 3309 | CA  | SER | A | 419 | 18.115 | -2.791 | 31.338 | 1.00 | 24.81 | C   |
| ATOM | 3310 | C   | SER | A | 419 | 18.045 | -1.274 | 31.448 | 1.00 | 23.00 | C   |
| ATOM | 3311 | O   | SER | A | 419 | 17.072 | -0.685 | 31.022 | 1.00 | 23.69 | O   |
| ATOM | 3312 | CB  | SER | A | 419 | 18.449 | -3.159 | 29.888 | 1.00 | 25.20 | C   |
| ATOM | 3313 | OG  | SER | A | 419 | 18.798 | -4.528 | 29.762 | 1.00 | 28.67 | O   |
| ATOM | 3314 | N   | THR | A | 420 | 19.130 | -0.623 | 31.854 | 1.00 | 24.58 | N   |
| ATOM | 3315 | CA  | THR | A | 420 | 19.075 | 0.829  | 32.039 | 1.00 | 24.29 | C   |
| ATOM | 3316 | C   | THR | A | 420 | 18.501 | 1.555  | 30.855 | 1.00 | 24.81 | C   |
| ATOM | 3317 | O   | THR | A | 420 | 17.600 | 2.367  | 31.013 | 1.00 | 26.08 | O   |
| ATOM | 3318 | CB  | THR | A | 420 | 20.425 | 1.453  | 32.348 | 1.00 | 21.78 | C   |
| ATOM | 3319 | CG2 | THR | A | 420 | 20.375 | 2.953  | 32.130 | 1.00 | 21.26 | C   |
| ATOM | 3320 | OG1 | THR | A | 420 | 20.763 | 1.193  | 33.715 | 1.00 | 24.19 | O   |
| ATOM | 3321 | N   | PRO | A | 421 | 18.946 | 1.222  | 29.642 | 1.00 | 25.02 | N   |
| ATOM | 3322 | CA  | PRO | A | 421 | 18.193 | 1.830  | 28.545 | 1.00 | 26.98 | C   |
| ATOM | 3323 | C   | PRO | A | 421 | 16.704 | 1.458  | 28.629 | 1.00 | 27.18 | C   |
| ATOM | 3324 | O   | PRO | A | 421 | 15.850 | 2.349  | 28.768 | 1.00 | 25.10 | O   |
| ATOM | 3325 | CB  | PRO | A | 421 | 18.867 | 1.272  | 27.282 | 1.00 | 27.79 | C   |
| ATOM | 3326 | CG  | PRO | A | 421 | 19.758 | 0.135  | 27.777 | 1.00 | 29.44 | C   |
| ATOM | 3327 | CD  | PRO | A | 421 | 20.152 | 0.531  | 29.167 | 1.00 | 25.03 | C   |
| ATOM | 3328 | N   | THR | A | 422 | 16.427 | 0.149  | 28.728 | 1.00 | 26.36 | N   |
| ATOM | 3329 | CA  | THR | A | 422 | 15.064 | -0.393 | 28.605 | 1.00 | 24.58 | C   |
| ATOM | 3330 | C   | THR | A | 422 | 14.162 | 0.069  | 29.744 | 1.00 | 24.87 | C   |
| ATOM | 3331 | O   | THR | A | 422 | 13.011 | -0.349 | 29.839 | 1.00 | 27.96 | O   |
| ATOM | 3332 | CB  | THR | A | 422 | 15.058 | -1.947 | 28.560 | 1.00 | 21.16 | C   |
| ATOM | 3333 | CG2 | THR | A | 422 | 13.682 | -2.465 | 28.189 | 1.00 | 21.32 | C   |
| ATOM | 3334 | OG1 | THR | A | 422 | 15.985 | -2.411 | 27.570 | 1.00 | 20.86 | O   |

|      |      |     |     |   |     |        |        |        |      |       |     |
|------|------|-----|-----|---|-----|--------|--------|--------|------|-------|-----|
| ATOM | 3335 | N   | LEU | A | 423 | 14.745 | 0.778  | 30.703 | 1.00 | 25.19 | N   |
| ATOM | 3336 | CA  | LEU | A | 423 | 13.976 | 1.651  | 31.558 | 1.00 | 22.20 | C   |
| ATOM | 3337 | C   | LEU | A | 423 | 13.860 | 2.946  | 30.755 | 1.00 | 22.66 | C   |
| ATOM | 3338 | O   | LEU | A | 423 | 12.860 | 3.113  | 30.062 | 1.00 | 22.77 | O   |
| ATOM | 3339 | CB  | LEU | A | 423 | 14.689 | 1.889  | 32.891 | 1.00 | 23.24 | C   |
| ATOM | 3340 | CG  | LEU | A | 423 | 14.626 | 0.885  | 34.065 | 1.00 | 22.20 | C   |
| ATOM | 3341 | CD1 | LEU | A | 423 | 13.289 | 0.159  | 34.098 | 1.00 | 19.45 | C   |
| ATOM | 3342 | CD2 | LEU | A | 423 | 15.788 | -0.093 | 33.971 | 1.00 | 18.12 | C   |
| ATOM | 3343 | N   | VAL | A | 424 | 14.969 | 3.678  | 30.592 | 1.00 | 22.40 | N   |
| ATOM | 3344 | CA  | VAL | A | 424 | 14.941 | 5.007  | 29.944 | 1.00 | 19.48 | C   |
| ATOM | 3345 | C   | VAL | A | 424 | 14.315 | 5.097  | 28.554 | 1.00 | 21.48 | C   |
| ATOM | 3346 | O   | VAL | A | 424 | 14.119 | 6.211  | 28.067 | 1.00 | 23.47 | O   |
| ATOM | 3347 | CB  | VAL | A | 424 | 16.337 | 5.707  | 29.809 | 1.00 | 17.06 | C   |
| ATOM | 3348 | CG1 | VAL | A | 424 | 16.141 | 7.204  | 29.867 | 1.00 | 9.48  | C   |
| ATOM | 3349 | CG2 | VAL | A | 424 | 17.336 | 5.264  | 30.890 | 1.00 | 14.26 | C   |
| ATOM | 3350 | N   | GLU | A | 425 | 13.977 | 3.977  | 27.908 | 1.00 | 20.71 | N   |
| ATOM | 3351 | CA  | GLU | A | 425 | 13.114 | 4.076  | 26.724 | 1.00 | 20.21 | C   |
| ATOM | 3352 | C   | GLU | A | 425 | 11.679 | 4.209  | 27.187 | 1.00 | 21.09 | C   |
| ATOM | 3353 | O   | GLU | A | 425 | 10.983 | 5.151  | 26.790 | 1.00 | 22.27 | O   |
| ATOM | 3354 | CB  | GLU | A | 425 | 13.231 | 2.868  | 25.790 | 1.00 | 19.48 | C   |
| ATOM | 3355 | CG  | GLU | A | 425 | 13.577 | 3.210  | 24.334 | 1.00 | 17.47 | C   |
| ATOM | 3356 | CD  | GLU | A | 425 | 12.582 | 4.152  | 23.653 | 1.00 | 17.36 | C   |
| ATOM | 3357 | OE1 | GLU | A | 425 | 12.703 | 5.386  | 23.801 | 1.00 | 16.77 | O   |
| ATOM | 3358 | OE2 | GLU | A | 425 | 11.746 | 3.674  | 22.860 | 1.00 | 20.99 | O1- |
| ATOM | 3359 | N   | VAL | A | 426 | 11.277 | 3.332  | 28.108 | 1.00 | 20.45 | N   |
| ATOM | 3360 | CA  | VAL | A | 426 | 9.940  | 3.379  | 28.710 | 1.00 | 18.52 | C   |
| ATOM | 3361 | C   | VAL | A | 426 | 9.831  | 4.594  | 29.631 | 1.00 | 17.11 | C   |
| ATOM | 3362 | O   | VAL | A | 426 | 9.014  | 5.466  | 29.407 | 1.00 | 19.30 | O   |
| ATOM | 3363 | CB  | VAL | A | 426 | 9.662  | 2.131  | 29.556 | 1.00 | 17.57 | C   |
| ATOM | 3364 | CG1 | VAL | A | 426 | 8.194  | 1.980  | 29.795 | 1.00 | 17.28 | C   |
| ATOM | 3365 | CG2 | VAL | A | 426 | 10.227 | 0.911  | 28.878 | 1.00 | 20.59 | C   |
| ATOM | 3366 | N   | SER | A | 427 | 10.693 | 4.664  | 30.635 | 1.00 | 14.13 | N   |
| ATOM | 3367 | CA  | SER | A | 427 | 10.598 | 5.670  | 31.676 | 1.00 | 14.17 | C   |
| ATOM | 3368 | C   | SER | A | 427 | 10.109 | 7.012  | 31.164 | 1.00 | 13.54 | C   |
| ATOM | 3369 | O   | SER | A | 427 | 9.024  | 7.432  | 31.522 | 1.00 | 11.17 | O   |
| ATOM | 3370 | CB  | SER | A | 427 | 11.950 | 5.834  | 32.356 | 1.00 | 17.92 | C   |
| ATOM | 3371 | OG  | SER | A | 427 | 12.541 | 4.586  | 32.668 | 1.00 | 14.61 | O   |
| ATOM | 3372 | N   | ARG | A | 428 | 10.786 | 7.547  | 30.152 | 1.00 | 15.97 | N   |
| ATOM | 3373 | CA  | ARG | A | 428 | 10.307 | 8.758  | 29.451 | 1.00 | 19.71 | C   |
| ATOM | 3374 | C   | ARG | A | 428 | 9.104  | 8.551  | 28.504 | 1.00 | 19.67 | C   |
| ATOM | 3375 | O   | ARG | A | 428 | 8.208  | 9.395  | 28.438 | 1.00 | 20.46 | O   |
| ATOM | 3376 | CB  | ARG | A | 428 | 11.447 | 9.463  | 28.679 | 1.00 | 17.27 | C   |
| ATOM | 3377 | CG  | ARG | A | 428 | 12.600 | 8.580  | 28.234 | 1.00 | 13.84 | C   |
| ATOM | 3378 | CD  | ARG | A | 428 | 13.345 | 9.187  | 27.075 | 1.00 | 12.03 | C   |
| ATOM | 3379 | NE  | ARG | A | 428 | 13.832 | 10.531 | 27.369 | 1.00 | 13.38 | N   |
| ATOM | 3380 | CZ  | ARG | A | 428 | 13.437 | 11.648 | 26.750 | 1.00 | 12.65 | C   |
| ATOM | 3381 | NH1 | ARG | A | 428 | 12.447 | 11.635 | 25.863 | 1.00 | 7.48  | N1+ |
| ATOM | 3382 | NH2 | ARG | A | 428 | 14.028 | 12.800 | 27.040 | 1.00 | 10.10 | N   |
| ATOM | 3383 | N   | ASN | A | 429 | 9.094  | 7.458  | 27.750 | 1.00 | 20.12 | N   |
| ATOM | 3384 | CA  | ASN | A | 429 | 7.972  | 7.177  | 26.876 | 1.00 | 20.34 | C   |
| ATOM | 3385 | C   | ASN | A | 429 | 6.612  | 7.140  | 27.579 | 1.00 | 20.43 | C   |
| ATOM | 3386 | O   | ASN | A | 429 | 5.772  | 7.993  | 27.303 | 1.00 | 23.09 | O   |
| ATOM | 3387 | CB  | ASN | A | 429 | 8.215  | 5.903  | 26.081 | 1.00 | 19.92 | C   |
| ATOM | 3388 | CG  | ASN | A | 429 | 8.527  | 6.196  | 24.626 | 1.00 | 23.69 | C   |
| ATOM | 3389 | ND2 | ASN | A | 429 | 9.313  | 7.253  | 24.394 | 1.00 | 24.44 | N   |
| ATOM | 3390 | OD1 | ASN | A | 429 | 7.988  | 5.552  | 23.716 | 1.00 | 23.46 | O   |
| ATOM | 3391 | N   | LEU | A | 430 | 6.418  | 6.233  | 28.542 | 1.00 | 18.98 | N   |
| ATOM | 3392 | CA  | LEU | A | 430 | 5.201  | 6.222  | 29.366 | 1.00 | 13.10 | C   |
| ATOM | 3393 | C   | LEU | A | 430 | 5.217  | 7.456  | 30.222 | 1.00 | 13.42 | C   |
| ATOM | 3394 | O   | LEU | A | 430 | 4.270  | 7.738  | 30.921 | 1.00 | 14.99 | O   |
| ATOM | 3395 | CB  | LEU | A | 430 | 5.120  | 4.968  | 30.239 | 1.00 | 7.34  | C   |
| ATOM | 3396 | CG  | LEU | A | 430 | 5.092  | 4.992  | 31.769 | 1.00 | 2.61  | C   |
| ATOM | 3397 | CD1 | LEU | A | 430 | 4.894  | 3.578  | 32.284 | 1.00 | 3.10  | C   |
| ATOM | 3398 | CD2 | LEU | A | 430 | 6.381  | 5.518  | 32.313 | 1.00 | 2.00  | C   |
| ATOM | 3399 | N   | GLY | A | 431 | 6.352  | 8.135  | 30.244 | 1.00 | 16.38 | N   |
| ATOM | 3400 | CA  | GLY | A | 431 | 6.351  | 9.513  | 30.682 | 1.00 | 17.97 | C   |
| ATOM | 3401 | C   | GLY | A | 431 | 5.371  | 10.263 | 29.810 | 1.00 | 17.99 | C   |
| ATOM | 3402 | O   | GLY | A | 431 | 4.290  | 10.586 | 30.285 | 1.00 | 20.37 | O   |
| ATOM | 3403 | N   | LYS | A | 432 | 5.621  | 10.252 | 28.499 | 1.00 | 16.66 | N   |
| ATOM | 3404 | CA  | LYS | A | 432 | 4.947  | 11.127 | 27.524 | 1.00 | 15.91 | C   |
| ATOM | 3405 | C   | LYS | A | 432 | 3.429  | 11.034 | 27.418 | 1.00 | 15.02 | C   |

|      |      |     |     |   |     |         |        |        |      |       |     |
|------|------|-----|-----|---|-----|---------|--------|--------|------|-------|-----|
| ATOM | 3406 | O   | LYS | A | 432 | 2.850   | 11.519 | 26.453 | 1.00 | 11.29 | O   |
| ATOM | 3407 | CB  | LYS | A | 432 | 5.525   | 10.900 | 26.135 | 1.00 | 16.80 | C   |
| ATOM | 3408 | CG  | LYS | A | 432 | 7.003   | 11.220 | 25.997 | 1.00 | 18.19 | C   |
| ATOM | 3409 | CD  | LYS | A | 432 | 7.359   | 11.418 | 24.526 | 1.00 | 19.26 | C   |
| ATOM | 3410 | CE  | LYS | A | 432 | 8.406   | 10.405 | 24.082 | 1.00 | 22.95 | C   |
| ATOM | 3411 | NZ  | LYS | A | 432 | 8.438   | 10.312 | 22.595 | 1.00 | 27.31 | N1+ |
| ATOM | 3412 | N   | VAL | A | 433 | 2.802   | 10.333 | 28.356 | 1.00 | 16.94 | N   |
| ATOM | 3413 | CA  | VAL | A | 433 | 1.353   | 10.328 | 28.507 | 1.00 | 15.68 | C   |
| ATOM | 3414 | C   | VAL | A | 433 | 0.985   | 11.622 | 29.194 | 1.00 | 14.62 | C   |
| ATOM | 3415 | O   | VAL | A | 433 | 0.140   | 12.354 | 28.707 | 1.00 | 18.83 | O   |
| ATOM | 3416 | CB  | VAL | A | 433 | 0.878   | 9.124  | 29.363 | 1.00 | 16.06 | C   |
| ATOM | 3417 | CG1 | VAL | A | 433 | -0.188  | 9.552  | 30.376 | 1.00 | 15.00 | C   |
| ATOM | 3418 | CG2 | VAL | A | 433 | 0.367   | 8.019  | 28.463 | 1.00 | 10.29 | C   |
| ATOM | 3419 | N   | GLY | A | 434 | 1.701   | 11.967 | 30.251 | 1.00 | 13.40 | N   |
| ATOM | 3420 | CA  | GLY | A | 434 | 1.392   | 13.190 | 30.969 | 1.00 | 17.13 | C   |
| ATOM | 3421 | C   | GLY | A | 434 | 1.177   | 14.348 | 30.013 | 1.00 | 18.55 | C   |
| ATOM | 3422 | O   | GLY | A | 434 | 0.108   | 14.946 | 29.981 | 1.00 | 17.84 | O   |
| ATOM | 3423 | N   | SER | A | 435 | 2.091   | 14.472 | 29.063 | 1.00 | 20.65 | N   |
| ATOM | 3424 | CA  | SER | A | 435 | 2.031   | 15.533 | 28.073 | 1.00 | 21.99 | C   |
| ATOM | 3425 | C   | SER | A | 435 | 0.790   | 15.331 | 27.200 | 1.00 | 22.53 | C   |
| ATOM | 3426 | O   | SER | A | 435 | -0.251  | 15.929 | 27.471 | 1.00 | 22.40 | O   |
| ATOM | 3427 | CB  | SER | A | 435 | 3.329   | 15.553 | 27.221 | 1.00 | 25.26 | C   |
| ATOM | 3428 | OG  | SER | A | 435 | 4.523   | 15.746 | 28.007 | 1.00 | 22.37 | O   |
| ATOM | 3429 | N   | LYS | A | 436 | 0.832   | 14.330 | 26.322 | 1.00 | 23.94 | N   |
| ATOM | 3430 | CA  | LYS | A | 436 | -0.157  | 14.181 | 25.250 | 1.00 | 25.08 | C   |
| ATOM | 3431 | C   | LYS | A | 436 | -1.528  | 13.626 | 25.661 | 1.00 | 24.18 | C   |
| ATOM | 3432 | O   | LYS | A | 436 | -2.216  | 13.046 | 24.827 | 1.00 | 26.29 | O   |
| ATOM | 3433 | CB  | LYS | A | 436 | 0.410   | 13.295 | 24.120 | 1.00 | 27.26 | C   |
| ATOM | 3434 | CG  | LYS | A | 436 | -0.211  | 13.540 | 22.713 | 1.00 | 29.66 | C   |
| ATOM | 3435 | CD  | LYS | A | 436 | -0.836  | 12.276 | 22.091 | 1.00 | 28.08 | C   |
| ATOM | 3436 | CE  | LYS | A | 436 | -2.362  | 12.442 | 21.910 | 1.00 | 28.14 | C   |
| ATOM | 3437 | NZ  | LYS | A | 436 | -3.079  | 11.155 | 21.561 | 1.00 | 26.79 | N1+ |
| ATOM | 3438 | N   | CYS | A | 437 | -1.959  | 13.825 | 26.903 | 1.00 | 22.66 | N   |
| ATOM | 3439 | CA  | CYS | A | 437 | -3.299  | 13.371 | 27.287 | 1.00 | 22.80 | C   |
| ATOM | 3440 | C   | CYS | A | 437 | -3.940  | 14.098 | 28.461 | 1.00 | 22.95 | C   |
| ATOM | 3441 | O   | CYS | A | 437 | -5.118  | 14.394 | 28.420 | 1.00 | 23.92 | O   |
| ATOM | 3442 | CB  | CYS | A | 437 | -3.317  | 11.854 | 27.520 | 1.00 | 19.38 | C   |
| ATOM | 3443 | SG  | CYS | A | 437 | -3.502  | 10.914 | 25.959 | 1.00 | 24.98 | S   |
| ATOM | 3444 | N   | CYS | A | 438 | -3.170  | 14.449 | 29.484 | 1.00 | 23.70 | N   |
| ATOM | 3445 | CA  | CYS | A | 438 | -3.717  | 15.267 | 30.546 | 1.00 | 22.08 | C   |
| ATOM | 3446 | C   | CYS | A | 438 | -4.216  | 16.551 | 29.900 | 1.00 | 23.11 | C   |
| ATOM | 3447 | O   | CYS | A | 438 | -5.390  | 16.891 | 30.012 | 1.00 | 23.14 | O   |
| ATOM | 3448 | CB  | CYS | A | 438 | -2.650  | 15.582 | 31.595 | 1.00 | 19.90 | C   |
| ATOM | 3449 | SG  | CYS | A | 438 | -1.760  | 14.132 | 32.242 | 1.00 | 17.60 | S   |
| ATOM | 3450 | N   | LYS | A | 439 | -3.378  | 17.119 | 29.037 | 1.00 | 25.03 | N   |
| ATOM | 3451 | CA  | LYS | A | 439 | -3.676  | 18.377 | 28.346 | 1.00 | 25.75 | C   |
| ATOM | 3452 | C   | LYS | A | 439 | -4.672  | 18.082 | 27.239 | 1.00 | 25.01 | C   |
| ATOM | 3453 | O   | LYS | A | 439 | -4.405  | 18.336 | 26.059 | 1.00 | 22.62 | O   |
| ATOM | 3454 | CB  | LYS | A | 439 | -2.385  | 18.981 | 27.761 | 1.00 | 27.02 | C   |
| ATOM | 3455 | CG  | LYS | A | 439 | -2.044  | 20.364 | 28.297 | 1.00 | 26.58 | C   |
| ATOM | 3456 | CD  | LYS | A | 439 | -0.569  | 20.490 | 28.681 | 1.00 | 25.12 | C   |
| ATOM | 3457 | CE  | LYS | A | 439 | -0.261  | 21.909 | 29.205 | 1.00 | 26.40 | C   |
| ATOM | 3458 | NZ  | LYS | A | 439 | 1.186   | 22.172 | 29.539 | 1.00 | 24.08 | N1+ |
| ATOM | 3459 | N   | HIS | A | 440 | -5.835  | 17.575 | 27.646 | 1.00 | 25.71 | N   |
| ATOM | 3460 | CA  | HIS | A | 440 | -6.781  | 16.952 | 26.733 | 1.00 | 25.96 | C   |
| ATOM | 3461 | C   | HIS | A | 440 | -8.119  | 16.494 | 27.332 | 1.00 | 26.52 | C   |
| ATOM | 3462 | O   | HIS | A | 440 | -8.967  | 16.005 | 26.602 | 1.00 | 27.11 | O   |
| ATOM | 3463 | CB  | HIS | A | 440 | -6.108  | 15.762 | 26.054 | 1.00 | 24.62 | C   |
| ATOM | 3464 | CG  | HIS | A | 440 | -7.055  | 14.877 | 25.323 | 1.00 | 20.53 | C   |
| ATOM | 3465 | CD2 | HIS | A | 440 | -7.449  | 13.606 | 25.559 | 1.00 | 20.18 | C   |
| ATOM | 3466 | ND1 | HIS | A | 440 | -7.787  | 15.313 | 24.247 | 1.00 | 21.98 | N   |
| ATOM | 3467 | CE1 | HIS | A | 440 | -8.575  | 14.341 | 23.830 | 1.00 | 22.57 | C   |
| ATOM | 3468 | NE2 | HIS | A | 440 | -8.386  | 13.291 | 24.607 | 1.00 | 20.14 | N   |
| ATOM | 3469 | N   | PRO | A | 441 | -8.400  | 16.840 | 28.595 | 1.00 | 28.45 | N   |
| ATOM | 3470 | CA  | PRO | A | 441 | -9.107  | 15.970 | 29.553 | 1.00 | 30.20 | C   |
| ATOM | 3471 | C   | PRO | A | 441 | -10.490 | 15.409 | 29.137 | 1.00 | 30.12 | C   |
| ATOM | 3472 | O   | PRO | A | 441 | -10.683 | 15.001 | 27.984 | 1.00 | 28.70 | O   |
| ATOM | 3473 | CB  | PRO | A | 441 | -9.202  | 16.838 | 30.811 | 1.00 | 32.36 | C   |
| ATOM | 3474 | CG  | PRO | A | 441 | -9.186  | 18.258 | 30.292 | 1.00 | 32.89 | C   |
| ATOM | 3475 | CD  | PRO | A | 441 | -8.282  | 18.229 | 29.090 | 1.00 | 30.04 | C   |
| ATOM | 3476 | N   | GLU | A | 442 | -11.410 | 15.285 | 30.101 | 1.00 | 29.30 | N   |

|      |      |     |     |   |     |         |        |        |      |       |     |
|------|------|-----|-----|---|-----|---------|--------|--------|------|-------|-----|
| ATOM | 3477 | CA  | GLU | A | 442 | -12.751 | 14.720 | 29.866 | 1.00 | 29.85 | C   |
| ATOM | 3478 | C   | GLU | A | 442 | -12.863 | 13.169 | 29.936 | 1.00 | 28.51 | C   |
| ATOM | 3479 | O   | GLU | A | 442 | -12.375 | 12.533 | 30.885 | 1.00 | 22.26 | O   |
| ATOM | 3480 | CB  | GLU | A | 442 | -13.324 | 15.201 | 28.507 | 1.00 | 29.58 | C   |
| ATOM | 3481 | CG  | GLU | A | 442 | -13.697 | 16.673 | 28.422 | 1.00 | 26.93 | C   |
| ATOM | 3482 | CD  | GLU | A | 442 | -12.757 | 17.475 | 27.541 | 1.00 | 25.31 | C   |
| ATOM | 3483 | OE1 | GLU | A | 442 | -11.572 | 17.123 | 27.442 | 1.00 | 20.53 | O   |
| ATOM | 3484 | OE2 | GLU | A | 442 | -13.192 | 18.505 | 26.974 | 1.00 | 28.11 | O1- |
| ATOM | 3485 | N   | ALA | A | 443 | -13.822 | 12.669 | 29.147 | 1.00 | 27.70 | N   |
| ATOM | 3486 | CA  | ALA | A | 443 | -13.825 | 11.304 | 28.638 | 1.00 | 26.01 | C   |
| ATOM | 3487 | C   | ALA | A | 443 | -12.551 | 11.111 | 27.852 | 1.00 | 24.19 | C   |
| ATOM | 3488 | O   | ALA | A | 443 | -11.639 | 10.447 | 28.316 | 1.00 | 26.28 | O   |
| ATOM | 3489 | CB  | ALA | A | 443 | -15.016 | 11.089 | 27.708 | 1.00 | 26.77 | C   |
| ATOM | 3490 | N   | LYS | A | 444 | -12.411 | 11.892 | 26.788 | 1.00 | 22.05 | N   |
| ATOM | 3491 | CA  | LYS | A | 444 | -11.370 | 11.674 | 25.785 | 1.00 | 21.39 | C   |
| ATOM | 3492 | C   | LYS | A | 444 | -10.000 | 11.321 | 26.357 | 1.00 | 20.82 | C   |
| ATOM | 3493 | O   | LYS | A | 444 | -9.137  | 10.831 | 25.620 | 1.00 | 18.13 | O   |
| ATOM | 3494 | CB  | LYS | A | 444 | -11.248 | 12.911 | 24.894 | 1.00 | 22.35 | C   |
| ATOM | 3495 | CG  | LYS | A | 444 | -11.775 | 12.721 | 23.484 | 1.00 | 22.26 | C   |
| ATOM | 3496 | CD  | LYS | A | 444 | -13.306 | 12.807 | 23.457 | 1.00 | 20.62 | C   |
| ATOM | 3497 | CE  | LYS | A | 444 | -13.783 | 14.030 | 22.666 | 1.00 | 18.58 | C   |
| ATOM | 3498 | NZ  | LYS | A | 444 | -13.011 | 15.272 | 22.977 | 1.00 | 15.81 | N1+ |
| ATOM | 3499 | N   | ARG | A | 445 | -9.762  | 11.777 | 27.594 | 1.00 | 20.03 | N   |
| ATOM | 3500 | CA  | ARG | A | 445 | -8.614  | 11.392 | 28.429 | 1.00 | 18.49 | C   |
| ATOM | 3501 | C   | ARG | A | 445 | -8.397  | 9.892  | 28.555 | 1.00 | 19.53 | C   |
| ATOM | 3502 | O   | ARG | A | 445 | -7.514  | 9.343  | 27.914 | 1.00 | 21.22 | O   |
| ATOM | 3503 | CB  | ARG | A | 445 | -8.758  | 11.970 | 29.830 | 1.00 | 14.76 | C   |
| ATOM | 3504 | CG  | ARG | A | 445 | -7.643  | 11.580 | 30.764 | 1.00 | 10.97 | C   |
| ATOM | 3505 | CD  | ARG | A | 445 | -7.994  | 11.871 | 32.222 | 1.00 | 11.73 | C   |
| ATOM | 3506 | NE  | ARG | A | 445 | -8.114  | 13.288 | 32.629 | 1.00 | 13.19 | N   |
| ATOM | 3507 | CZ  | ARG | A | 445 | -7.458  | 14.336 | 32.122 | 1.00 | 9.58  | C   |
| ATOM | 3508 | NH1 | ARG | A | 445 | -6.945  | 14.323 | 30.899 | 1.00 | 7.80  | N1+ |
| ATOM | 3509 | NH2 | ARG | A | 445 | -7.497  | 15.482 | 32.775 | 1.00 | 6.22  | N   |
| ATOM | 3510 | N   | MET | A | 446 | -9.204  | 9.204  | 29.348 | 1.00 | 20.28 | N   |
| ATOM | 3511 | CA  | MET | A | 446 | -8.894  | 7.805  | 29.608 | 1.00 | 22.11 | C   |
| ATOM | 3512 | C   | MET | A | 446 | -8.796  | 6.892  | 28.368 | 1.00 | 21.20 | C   |
| ATOM | 3513 | O   | MET | A | 446 | -7.843  | 6.105  | 28.273 | 1.00 | 21.62 | O   |
| ATOM | 3514 | CB  | MET | A | 446 | -9.830  | 7.188  | 30.659 | 1.00 | 22.74 | C   |
| ATOM | 3515 | CG  | MET | A | 446 | -9.620  | 5.693  | 30.794 | 1.00 | 24.58 | C   |
| ATOM | 3516 | SD  | MET | A | 446 | -9.860  | 4.949  | 32.408 | 1.00 | 28.20 | S   |
| ATOM | 3517 | CE  | MET | A | 446 | -11.076 | 3.660  | 31.945 | 1.00 | 22.67 | C   |
| ATOM | 3518 | N   | PRO | A | 447 | -9.733  | 6.979  | 27.405 | 1.00 | 20.32 | N   |
| ATOM | 3519 | CA  | PRO | A | 447 | -9.574  | 6.042  | 26.294 | 1.00 | 22.10 | C   |
| ATOM | 3520 | C   | PRO | A | 447 | -8.133  | 6.079  | 25.772 | 1.00 | 23.45 | C   |
| ATOM | 3521 | O   | PRO | A | 447 | -7.541  | 5.014  | 25.563 | 1.00 | 25.75 | O   |
| ATOM | 3522 | CB  | PRO | A | 447 | -10.578 | 6.532  | 25.234 | 1.00 | 21.91 | C   |
| ATOM | 3523 | CG  | PRO | A | 447 | -11.561 | 7.311  | 25.970 | 1.00 | 20.33 | C   |
| ATOM | 3524 | CD  | PRO | A | 447 | -10.792 | 7.962  | 27.113 | 1.00 | 22.51 | C   |
| ATOM | 3525 | N   | CYS | A | 448 | -7.509  | 7.266  | 25.813 | 1.00 | 21.39 | N   |
| ATOM | 3526 | CA  | CYS | A | 448 | -6.156  | 7.436  | 25.279 | 1.00 | 19.05 | C   |
| ATOM | 3527 | C   | CYS | A | 448 | -5.183  | 6.767  | 26.222 | 1.00 | 18.85 | C   |
| ATOM | 3528 | O   | CYS | A | 448 | -4.317  | 6.025  | 25.775 | 1.00 | 21.92 | O   |
| ATOM | 3529 | CB  | CYS | A | 448 | -5.756  | 8.916  | 25.173 | 1.00 | 19.04 | C   |
| ATOM | 3530 | SG  | CYS | A | 448 | -4.591  | 9.295  | 26.505 | 1.00 | 20.87 | S   |
| ATOM | 3531 | N   | ALA | A | 449 | -5.386  | 6.971  | 27.527 | 1.00 | 17.31 | N   |
| ATOM | 3532 | CA  | ALA | A | 449 | -4.314  | 6.924  | 28.522 | 1.00 | 13.97 | C   |
| ATOM | 3533 | C   | ALA | A | 449 | -4.209  | 5.679  | 29.390 | 1.00 | 16.06 | C   |
| ATOM | 3534 | O   | ALA | A | 449 | -3.241  | 5.544  | 30.100 | 1.00 | 20.40 | O   |
| ATOM | 3535 | CB  | ALA | A | 449 | -4.376  | 8.142  | 29.409 | 1.00 | 10.09 | C   |
| ATOM | 3536 | N   | GLU | A | 450 | -5.188  | 4.780  | 29.374 | 1.00 | 17.26 | N   |
| ATOM | 3537 | CA  | GLU | A | 450 | -4.941  | 3.417  | 29.855 | 1.00 | 16.55 | C   |
| ATOM | 3538 | C   | GLU | A | 450 | -4.304  | 2.693  | 28.672 | 1.00 | 18.65 | C   |
| ATOM | 3539 | O   | GLU | A | 450 | -3.139  | 2.330  | 28.712 | 1.00 | 18.04 | O   |
| ATOM | 3540 | CB  | GLU | A | 450 | -6.245  | 2.725  | 30.241 | 1.00 | 17.28 | C   |
| ATOM | 3541 | CG  | GLU | A | 450 | -6.151  | 1.924  | 31.533 | 1.00 | 15.50 | C   |
| ATOM | 3542 | CD  | GLU | A | 450 | -7.098  | 0.716  | 31.585 | 1.00 | 18.82 | C   |
| ATOM | 3543 | OE1 | GLU | A | 450 | -8.213  | 0.768  | 31.027 | 1.00 | 17.57 | O   |
| ATOM | 3544 | OE2 | GLU | A | 450 | -6.726  | -0.310 | 32.195 | 1.00 | 21.24 | O1- |
| ATOM | 3545 | N   | ASP | A | 451 | -4.985  | 2.799  | 27.531 | 1.00 | 19.88 | N   |
| ATOM | 3546 | CA  | ASP | A | 451 | -4.495  | 2.392  | 26.213 | 1.00 | 18.66 | C   |
| ATOM | 3547 | C   | ASP | A | 451 | -3.055  | 2.711  | 25.815 | 1.00 | 18.58 | C   |

|      |      |     |     |   |     |        |        |        |      |       |     |
|------|------|-----|-----|---|-----|--------|--------|--------|------|-------|-----|
| ATOM | 3548 | O   | ASP | A | 451 | -2.341 | 1.810  | 25.397 | 1.00 | 20.61 | O   |
| ATOM | 3549 | CB  | ASP | A | 451 | -5.435 | 2.927  | 25.140 | 1.00 | 17.00 | C   |
| ATOM | 3550 | CG  | ASP | A | 451 | -6.675 | 2.088  | 25.009 | 1.00 | 19.38 | C   |
| ATOM | 3551 | OD1 | ASP | A | 451 | -6.556 | 0.869  | 25.262 | 1.00 | 16.86 | O   |
| ATOM | 3552 | OD2 | ASP | A | 451 | -7.762 | 2.634  | 24.690 | 1.00 | 19.70 | O1- |
| ATOM | 3553 | N   | TYR | A | 452 | -2.658 | 3.981  | 25.827 | 1.00 | 16.13 | N   |
| ATOM | 3554 | CA  | TYR | A | 452 | -1.281 | 4.344  | 25.489 | 1.00 | 15.08 | C   |
| ATOM | 3555 | C   | TYR | A | 452 | -0.335 | 3.655  | 26.464 | 1.00 | 16.14 | C   |
| ATOM | 3556 | O   | TYR | A | 452 | 0.481  | 2.837  | 26.070 | 1.00 | 17.95 | O   |
| ATOM | 3557 | CB  | TYR | A | 452 | -1.093 | 5.854  | 25.560 | 1.00 | 13.93 | C   |
| ATOM | 3558 | CG  | TYR | A | 452 | 0.277  | 6.331  | 25.144 | 1.00 | 15.16 | C   |
| ATOM | 3559 | CD1 | TYR | A | 452 | 1.381  | 6.207  | 25.995 | 1.00 | 13.94 | C   |
| ATOM | 3560 | CD2 | TYR | A | 452 | 0.463  | 6.960  | 23.919 | 1.00 | 15.41 | C   |
| ATOM | 3561 | CE1 | TYR | A | 452 | 2.634  | 6.698  | 25.624 | 1.00 | 13.09 | C   |
| ATOM | 3562 | CE2 | TYR | A | 452 | 1.706  | 7.450  | 23.550 | 1.00 | 15.00 | C   |
| ATOM | 3563 | CZ  | TYR | A | 452 | 2.779  | 7.318  | 24.401 | 1.00 | 12.67 | C   |
| ATOM | 3564 | OH  | TYR | A | 452 | 3.973  | 7.861  | 24.029 | 1.00 | 11.49 | O   |
| ATOM | 3565 | N   | LEU | A | 453 | -0.498 | 3.931  | 27.751 | 1.00 | 16.23 | N   |
| ATOM | 3566 | CA  | LEU | A | 453 | 0.196  | 3.200  | 28.794 | 1.00 | 13.79 | C   |
| ATOM | 3567 | C   | LEU | A | 453 | 0.231  | 1.710  | 28.457 | 1.00 | 13.05 | C   |
| ATOM | 3568 | O   | LEU | A | 453 | 1.301  | 1.125  | 28.413 | 1.00 | 15.56 | O   |
| ATOM | 3569 | CB  | LEU | A | 453 | -0.502 | 3.427  | 30.135 | 1.00 | 11.83 | C   |
| ATOM | 3570 | CG  | LEU | A | 453 | 0.131  | 4.454  | 31.073 | 1.00 | 13.55 | C   |
| ATOM | 3571 | CD1 | LEU | A | 453 | -0.933 | 5.105  | 31.932 | 1.00 | 11.05 | C   |
| ATOM | 3572 | CD2 | LEU | A | 453 | 1.178  | 3.782  | 31.944 | 1.00 | 10.99 | C   |
| ATOM | 3573 | N   | SER | A | 454 | -0.879 | 1.181  | 27.955 | 1.00 | 11.72 | N   |
| ATOM | 3574 | CA  | SER | A | 454 | -0.980 | -0.244 | 27.649 | 1.00 | 11.87 | C   |
| ATOM | 3575 | C   | SER | A | 454 | -0.003 | -0.699 | 26.557 | 1.00 | 12.13 | C   |
| ATOM | 3576 | O   | SER | A | 454 | 0.518  | -1.825 | 26.598 | 1.00 | 8.69  | O   |
| ATOM | 3577 | CB  | SER | A | 454 | -2.408 | -0.605 | 27.220 | 1.00 | 14.00 | C   |
| ATOM | 3578 | OG  | SER | A | 454 | -3.390 | 0.232  | 27.809 | 1.00 | 11.75 | O   |
| ATOM | 3579 | N   | VAL | A | 455 | 0.155  | 0.154  | 25.543 | 1.00 | 11.63 | N   |
| ATOM | 3580 | CA  | VAL | A | 455 | 1.107  | -0.046 | 24.450 | 1.00 | 10.07 | C   |
| ATOM | 3581 | C   | VAL | A | 455 | 2.516  | -0.105 | 25.015 | 1.00 | 11.00 | C   |
| ATOM | 3582 | O   | VAL | A | 455 | 3.288  | -0.996 | 24.675 | 1.00 | 10.74 | O   |
| ATOM | 3583 | CB  | VAL | A | 455 | 1.075  | 1.128  | 23.425 | 1.00 | 11.18 | C   |
| ATOM | 3584 | CG1 | VAL | A | 455 | 2.127  | 0.913  | 22.352 | 1.00 | 10.50 | C   |
| ATOM | 3585 | CG2 | VAL | A | 455 | -0.299 | 1.283  | 22.809 | 1.00 | 6.79  | C   |
| ATOM | 3586 | N   | VAL | A | 456 | 2.858  | 0.864  | 25.861 | 1.00 | 12.33 | N   |
| ATOM | 3587 | CA  | VAL | A | 456 | 4.227  | 1.008  | 26.324 | 1.00 | 15.30 | C   |
| ATOM | 3588 | C   | VAL | A | 456 | 4.669  | -0.208 | 27.125 | 1.00 | 18.48 | C   |
| ATOM | 3589 | O   | VAL | A | 456 | 5.671  | -0.858 | 26.797 | 1.00 | 21.87 | O   |
| ATOM | 3590 | CB  | VAL | A | 456 | 4.399  | 2.248  | 27.164 | 1.00 | 13.68 | C   |
| ATOM | 3591 | CG1 | VAL | A | 456 | 5.777  | 2.285  | 27.727 | 1.00 | 14.03 | C   |
| ATOM | 3592 | CG2 | VAL | A | 456 | 4.167  | 3.460  | 26.316 | 1.00 | 17.71 | C   |
| ATOM | 3593 | N   | LEU | A | 457 | 3.867  | -0.585 | 28.110 | 1.00 | 18.16 | N   |
| ATOM | 3594 | CA  | LEU | A | 457 | 4.124  | -1.806 | 28.837 | 1.00 | 17.51 | C   |
| ATOM | 3595 | C   | LEU | A | 457 | 4.406  | -2.967 | 27.856 | 1.00 | 19.56 | C   |
| ATOM | 3596 | O   | LEU | A | 457 | 5.322  | -3.758 | 28.077 | 1.00 | 23.05 | O   |
| ATOM | 3597 | CB  | LEU | A | 457 | 2.943  | -2.096 | 29.782 | 1.00 | 14.10 | C   |
| ATOM | 3598 | CG  | LEU | A | 457 | 3.038  | -1.457 | 31.183 | 1.00 | 10.11 | C   |
| ATOM | 3599 | CD1 | LEU | A | 457 | 3.844  | -0.180 | 31.147 | 1.00 | 6.96  | C   |
| ATOM | 3600 | CD2 | LEU | A | 457 | 1.668  | -1.183 | 31.723 | 1.00 | 6.91  | C   |
| ATOM | 3601 | N   | ASN | A | 458 | 3.820  | -2.914 | 26.666 | 1.00 | 19.26 | N   |
| ATOM | 3602 | CA  | ASN | A | 458 | 4.044  | -3.982 | 25.696 | 1.00 | 20.09 | C   |
| ATOM | 3603 | C   | ASN | A | 458 | 5.403  | -3.848 | 25.054 | 1.00 | 20.20 | C   |
| ATOM | 3604 | O   | ASN | A | 458 | 6.144  | -4.823 | 25.000 | 1.00 | 22.87 | O   |
| ATOM | 3605 | CB  | ASN | A | 458 | 2.967  | -3.985 | 24.622 | 1.00 | 22.45 | C   |
| ATOM | 3606 | CG  | ASN | A | 458 | 3.165  | -5.070 | 23.594 | 1.00 | 23.30 | C   |
| ATOM | 3607 | ND2 | ASN | A | 458 | 3.201  | -4.665 | 22.348 | 1.00 | 27.57 | N   |
| ATOM | 3608 | OD1 | ASN | A | 458 | 3.122  | -6.263 | 23.895 | 1.00 | 25.73 | O   |
| ATOM | 3609 | N   | GLN | A | 459 | 5.782  | -2.627 | 24.683 | 1.00 | 18.71 | N   |
| ATOM | 3610 | CA  | GLN | A | 459 | 7.156  | -2.341 | 24.284 | 1.00 | 16.79 | C   |
| ATOM | 3611 | C   | GLN | A | 459 | 8.104  | -2.947 | 25.318 | 1.00 | 19.53 | C   |
| ATOM | 3612 | O   | GLN | A | 459 | 8.829  | -3.897 | 25.000 | 1.00 | 20.10 | O   |
| ATOM | 3613 | CB  | GLN | A | 459 | 7.375  | -0.850 | 24.212 | 1.00 | 16.06 | C   |
| ATOM | 3614 | CG  | GLN | A | 459 | 8.559  | -0.451 | 23.411 | 1.00 | 19.00 | C   |
| ATOM | 3615 | CD  | GLN | A | 459 | 8.212  | -0.265 | 21.970 | 1.00 | 18.86 | C   |
| ATOM | 3616 | NE2 | GLN | A | 459 | 7.618  | 0.865  | 21.647 | 1.00 | 18.61 | N   |
| ATOM | 3617 | OE1 | GLN | A | 459 | 8.431  | -1.150 | 21.156 | 1.00 | 20.77 | O   |
| ATOM | 3618 | N   | LEU | A | 460 | 7.894  | -2.591 | 26.591 | 1.00 | 19.18 | N   |

|      |      |     |     |   |     |        |         |        |      |       |     |
|------|------|-----|-----|---|-----|--------|---------|--------|------|-------|-----|
| ATOM | 3619 | CA  | LEU | A | 460 | 8.570  | -3.248  | 27.725 | 1.00 | 17.82 | C   |
| ATOM | 3620 | C   | LEU | A | 460 | 8.632  | -4.768  | 27.635 | 1.00 | 18.45 | C   |
| ATOM | 3621 | O   | LEU | A | 460 | 9.692  | -5.338  | 27.877 | 1.00 | 21.46 | O   |
| ATOM | 3622 | CB  | LEU | A | 460 | 7.919  | -2.860  | 29.063 | 1.00 | 15.63 | C   |
| ATOM | 3623 | CG  | LEU | A | 460 | 8.279  | -3.617  | 30.355 | 1.00 | 14.04 | C   |
| ATOM | 3624 | CD1 | LEU | A | 460 | 9.785  | -3.769  | 30.501 | 1.00 | 15.77 | C   |
| ATOM | 3625 | CD2 | LEU | A | 460 | 7.747  | -2.867  | 31.555 | 1.00 | 12.12 | C   |
| ATOM | 3626 | N   | CYS | A | 461 | 7.513  | -5.430  | 27.330 | 1.00 | 20.02 | N   |
| ATOM | 3627 | CA  | CYS | A | 461 | 7.470  | -6.904  | 27.322 | 1.00 | 20.16 | C   |
| ATOM | 3628 | C   | CYS | A | 461 | 8.172  | -7.527  | 26.121 | 1.00 | 21.18 | C   |
| ATOM | 3629 | O   | CYS | A | 461 | 8.929  | -8.505  | 26.272 | 1.00 | 19.43 | O   |
| ATOM | 3630 | CB  | CYS | A | 461 | 6.028  | -7.408  | 27.348 | 1.00 | 17.64 | C   |
| ATOM | 3631 | SG  | CYS | A | 461 | 5.081  | -6.878  | 28.795 | 1.00 | 17.61 | S   |
| ATOM | 3632 | N   | VAL | A | 462 | 7.942  | -6.920  | 24.950 | 1.00 | 21.46 | N   |
| ATOM | 3633 | CA  | VAL | A | 462 | 8.437  | -7.401  | 23.660 | 1.00 | 22.27 | C   |
| ATOM | 3634 | C   | VAL | A | 462 | 9.942  | -7.136  | 23.468 | 1.00 | 23.83 | C   |
| ATOM | 3635 | O   | VAL | A | 462 | 10.679 | -7.973  | 22.924 | 1.00 | 22.80 | O   |
| ATOM | 3636 | CB  | VAL | A | 462 | 7.672  | -6.738  | 22.517 | 1.00 | 20.37 | C   |
| ATOM | 3637 | CG1 | VAL | A | 462 | 6.179  | -6.891  | 22.734 | 1.00 | 20.18 | C   |
| ATOM | 3638 | CG2 | VAL | A | 462 | 8.039  | -5.304  | 22.420 | 1.00 | 17.82 | C   |
| ATOM | 3639 | N   | LEU | A | 463 | 10.358 | -5.933  | 23.863 | 1.00 | 24.45 | N   |
| ATOM | 3640 | CA  | LEU | A | 463 | 11.749 | -5.617  | 24.183 | 1.00 | 23.28 | C   |
| ATOM | 3641 | C   | LEU | A | 463 | 12.444 | -6.794  | 24.843 | 1.00 | 23.88 | C   |
| ATOM | 3642 | O   | LEU | A | 463 | 13.285 | -7.448  | 24.233 | 1.00 | 25.91 | O   |
| ATOM | 3643 | CB  | LEU | A | 463 | 11.800 | -4.420  | 25.144 | 1.00 | 20.02 | C   |
| ATOM | 3644 | CG  | LEU | A | 463 | 12.855 | -3.340  | 24.952 | 1.00 | 16.71 | C   |
| ATOM | 3645 | CD1 | LEU | A | 463 | 13.665 | -3.676  | 23.734 | 1.00 | 14.34 | C   |
| ATOM | 3646 | CD2 | LEU | A | 463 | 12.196 | -1.970  | 24.804 | 1.00 | 15.27 | C   |
| ATOM | 3647 | N   | HIS | A | 464 | 12.115 | -7.035  | 26.106 | 1.00 | 25.21 | N   |
| ATOM | 3648 | CA  | HIS | A | 464 | 12.941 | -7.887  | 26.951 | 1.00 | 27.10 | C   |
| ATOM | 3649 | C   | HIS | A | 464 | 12.269 | -9.220  | 27.310 | 1.00 | 25.73 | C   |
| ATOM | 3650 | O   | HIS | A | 464 | 11.668 | -9.364  | 28.380 | 1.00 | 26.56 | O   |
| ATOM | 3651 | CB  | HIS | A | 464 | 13.392 | -7.121  | 28.224 | 1.00 | 27.53 | C   |
| ATOM | 3652 | CG  | HIS | A | 464 | 14.883 | -7.158  | 28.474 | 1.00 | 26.94 | C   |
| ATOM | 3653 | CD2 | HIS | A | 464 | 15.904 | -7.678  | 27.738 | 1.00 | 21.05 | C   |
| ATOM | 3654 | ND1 | HIS | A | 464 | 15.464 | -6.665  | 29.625 | 1.00 | 24.27 | N   |
| ATOM | 3655 | CE1 | HIS | A | 464 | 16.764 | -6.892  | 29.600 | 1.00 | 20.67 | C   |
| ATOM | 3656 | NE2 | HIS | A | 464 | 17.053 | -7.502  | 28.464 | 1.00 | 17.48 | N   |
| ATOM | 3657 | N   | GLU | A | 465 | 12.180 | -10.082 | 26.305 | 1.00 | 23.46 | N   |
| ATOM | 3658 | CA  | GLU | A | 465 | 12.280 | -11.518 | 26.492 | 1.00 | 21.43 | C   |
| ATOM | 3659 | C   | GLU | A | 465 | 13.764 | -11.787 | 26.213 | 1.00 | 21.62 | C   |
| ATOM | 3660 | O   | GLU | A | 465 | 14.509 | -12.216 | 27.092 | 1.00 | 20.90 | O   |
| ATOM | 3661 | CB  | GLU | A | 465 | 11.406 | -12.258 | 25.458 | 1.00 | 23.62 | C   |
| ATOM | 3662 | CG  | GLU | A | 465 | 9.867  | -12.214 | 25.681 | 1.00 | 20.17 | C   |
| ATOM | 3663 | CD  | GLU | A | 465 | 9.063  | -12.794 | 24.503 | 1.00 | 18.19 | C   |
| ATOM | 3664 | OE1 | GLU | A | 465 | 8.978  | -12.111 | 23.465 | 1.00 | 15.65 | O   |
| ATOM | 3665 | OE2 | GLU | A | 465 | 8.455  | -13.888 | 24.626 | 1.00 | 15.39 | O1- |
| ATOM | 3666 | N   | LYS | A | 466 | 14.199 | -11.367 | 25.024 | 1.00 | 22.56 | N   |
| ATOM | 3667 | CA  | LYS | A | 466 | 15.611 | -11.327 | 24.604 | 1.00 | 24.39 | C   |
| ATOM | 3668 | C   | LYS | A | 466 | 16.664 | -11.640 | 25.685 | 1.00 | 21.61 | C   |
| ATOM | 3669 | O   | LYS | A | 466 | 17.404 | -12.606 | 25.542 | 1.00 | 22.78 | O   |
| ATOM | 3670 | CB  | LYS | A | 466 | 15.899 | -9.967  | 23.918 | 1.00 | 26.20 | C   |
| ATOM | 3671 | CG  | LYS | A | 466 | 17.381 | -9.571  | 23.804 | 1.00 | 27.48 | C   |
| ATOM | 3672 | CD  | LYS | A | 466 | 17.668 | -8.239  | 24.520 | 1.00 | 26.14 | C   |
| ATOM | 3673 | CE  | LYS | A | 466 | 19.123 | -7.796  | 24.343 | 1.00 | 23.78 | C   |
| ATOM | 3674 | NZ  | LYS | A | 466 | 20.084 | -8.644  | 25.115 | 1.00 | 20.55 | N1+ |
| ATOM | 3675 | N   | THR | A | 467 | 16.826 | -10.776 | 26.681 | 1.00 | 19.96 | N   |
| ATOM | 3676 | CA  | THR | A | 467 | 17.514 | -11.183 | 27.914 | 1.00 | 22.51 | C   |
| ATOM | 3677 | C   | THR | A | 467 | 16.397 | -11.294 | 28.923 | 1.00 | 25.70 | C   |
| ATOM | 3678 | O   | THR | A | 467 | 15.585 | -10.359 | 29.041 | 1.00 | 29.10 | O   |
| ATOM | 3679 | CB  | THR | A | 467 | 18.489 | -10.112 | 28.487 | 1.00 | 16.74 | C   |
| ATOM | 3680 | CG2 | THR | A | 467 | 19.829 | -10.712 | 28.809 | 1.00 | 14.95 | C   |
| ATOM | 3681 | OG1 | THR | A | 467 | 18.653 | -9.056  | 27.550 | 1.00 | 14.94 | O   |
| ATOM | 3682 | N   | PRO | A | 468 | 16.405 | -12.344 | 29.752 | 1.00 | 25.15 | N   |
| ATOM | 3683 | CA  | PRO | A | 468 | 15.248 | -12.352 | 30.645 | 1.00 | 26.23 | C   |
| ATOM | 3684 | C   | PRO | A | 468 | 15.654 | -11.886 | 32.035 | 1.00 | 25.34 | C   |
| ATOM | 3685 | O   | PRO | A | 468 | 16.667 | -12.324 | 32.567 | 1.00 | 24.12 | O   |
| ATOM | 3686 | CB  | PRO | A | 468 | 14.786 | -13.809 | 30.609 | 1.00 | 27.92 | C   |
| ATOM | 3687 | CG  | PRO | A | 468 | 15.621 | -14.461 | 29.496 | 1.00 | 26.78 | C   |
| ATOM | 3688 | CD  | PRO | A | 468 | 16.904 | -13.702 | 29.528 | 1.00 | 23.56 | C   |
| ATOM | 3689 | N   | VAL | A | 469 | 14.900 | -10.945 | 32.589 | 1.00 | 26.09 | N   |

|      |      |     |     |   |     |        |         |        |      |       |     |
|------|------|-----|-----|---|-----|--------|---------|--------|------|-------|-----|
| ATOM | 3690 | CA  | VAL | A | 469 | 15.269 | -10.322 | 33.863 | 1.00 | 26.57 | C   |
| ATOM | 3691 | C   | VAL | A | 469 | 14.259 | -10.507 | 35.043 | 1.00 | 26.29 | C   |
| ATOM | 3692 | O   | VAL | A | 469 | 14.272 | -11.537 | 35.720 | 1.00 | 25.05 | O   |
| ATOM | 3693 | CB  | VAL | A | 469 | 15.609 | -8.808  | 33.643 | 1.00 | 25.96 | C   |
| ATOM | 3694 | CG1 | VAL | A | 469 | 17.067 | -8.663  | 33.262 | 1.00 | 23.63 | C   |
| ATOM | 3695 | CG2 | VAL | A | 469 | 14.723 | -8.211  | 32.541 | 1.00 | 22.41 | C   |
| ATOM | 3696 | N   | SER | A | 470 | 13.398 | -9.520  | 35.283 | 1.00 | 24.94 | N   |
| ATOM | 3697 | CA  | SER | A | 470 | 12.584 | -9.486  | 36.492 | 1.00 | 25.10 | C   |
| ATOM | 3698 | C   | SER | A | 470 | 11.436 | -10.470 | 36.378 | 1.00 | 26.22 | C   |
| ATOM | 3699 | O   | SER | A | 470 | 10.438 | -10.196 | 35.697 | 1.00 | 27.50 | O   |
| ATOM | 3700 | CB  | SER | A | 470 | 12.021 | -8.070  | 36.744 | 1.00 | 24.74 | C   |
| ATOM | 3701 | OG  | SER | A | 470 | 11.640 | -7.884  | 38.110 | 1.00 | 22.77 | O   |
| ATOM | 3702 | N   | ASP | A | 471 | 11.516 | -11.553 | 37.145 | 1.00 | 25.67 | N   |
| ATOM | 3703 | CA  | ASP | A | 471 | 10.504 | -12.596 | 37.091 | 1.00 | 25.01 | C   |
| ATOM | 3704 | C   | ASP | A | 471 | 9.126  | -11.976 | 37.245 | 1.00 | 26.17 | C   |
| ATOM | 3705 | O   | ASP | A | 471 | 8.146  | -12.438 | 36.640 | 1.00 | 27.11 | O   |
| ATOM | 3706 | CB  | ASP | A | 471 | 10.765 | -13.620 | 38.175 | 1.00 | 23.33 | C   |
| ATOM | 3707 | CG  | ASP | A | 471 | 12.078 | -14.320 | 37.978 | 1.00 | 25.27 | C   |
| ATOM | 3708 | OD1 | ASP | A | 471 | 13.125 | -13.757 | 38.359 | 1.00 | 29.79 | O   |
| ATOM | 3709 | OD2 | ASP | A | 471 | 12.086 | -15.384 | 37.335 | 1.00 | 29.40 | O1- |
| ATOM | 3710 | N   | ARG | A | 472 | 9.108  | -10.793 | 37.853 | 1.00 | 25.75 | N   |
| ATOM | 3711 | CA  | ARG | A | 472 | 7.884  | -10.014 | 37.949 | 1.00 | 26.02 | C   |
| ATOM | 3712 | C   | ARG | A | 472 | 7.420  | -9.534  | 36.583 | 1.00 | 26.00 | C   |
| ATOM | 3713 | O   | ARG | A | 472 | 6.279  | -9.785  | 36.182 | 1.00 | 26.81 | O   |
| ATOM | 3714 | CB  | ARG | A | 472 | 8.098  | -8.836  | 38.897 | 1.00 | 25.19 | C   |
| ATOM | 3715 | CG  | ARG | A | 472 | 8.527  | -9.296  | 40.283 | 1.00 | 24.67 | C   |
| ATOM | 3716 | CD  | ARG | A | 472 | 7.413  | -9.145  | 41.277 | 1.00 | 20.81 | C   |
| ATOM | 3717 | NE  | ARG | A | 472 | 7.918  | -8.558  | 42.510 | 1.00 | 15.73 | N   |
| ATOM | 3718 | CZ  | ARG | A | 472 | 7.177  | -7.901  | 43.390 | 1.00 | 15.03 | C   |
| ATOM | 3719 | NH1 | ARG | A | 472 | 5.946  | -7.542  | 43.087 | 1.00 | 15.14 | N1+ |
| ATOM | 3720 | NH2 | ARG | A | 472 | 7.720  | -7.494  | 44.523 | 1.00 | 16.85 | N   |
| ATOM | 3721 | N   | VAL | A | 473 | 8.323  | -8.888  | 35.853 | 1.00 | 24.83 | N   |
| ATOM | 3722 | CA  | VAL | A | 473 | 8.029  | -8.415  | 34.512 | 1.00 | 23.45 | C   |
| ATOM | 3723 | C   | VAL | A | 473 | 7.641  | -9.624  | 33.669 | 1.00 | 22.85 | C   |
| ATOM | 3724 | O   | VAL | A | 473 | 6.743  | -9.554  | 32.840 | 1.00 | 22.94 | O   |
| ATOM | 3725 | CB  | VAL | A | 473 | 9.259  | -7.717  | 33.873 | 1.00 | 25.33 | C   |
| ATOM | 3726 | CG1 | VAL | A | 473 | 8.869  | -7.093  | 32.530 | 1.00 | 23.20 | C   |
| ATOM | 3727 | CG2 | VAL | A | 473 | 9.845  | -6.670  | 34.828 | 1.00 | 19.55 | C   |
| ATOM | 3728 | N   | THR | A | 474 | 8.260  | -10.755 | 33.947 | 1.00 | 21.09 | N   |
| ATOM | 3729 | CA  | THR | A | 474 | 7.847  | -11.976 | 33.298 | 1.00 | 24.95 | C   |
| ATOM | 3730 | C   | THR | A | 474 | 6.372  | -12.199 | 33.594 | 1.00 | 25.61 | C   |
| ATOM | 3731 | O   | THR | A | 474 | 5.565  | -12.398 | 32.675 | 1.00 | 27.28 | O   |
| ATOM | 3732 | CB  | THR | A | 474 | 8.647  | -13.169 | 33.829 | 1.00 | 27.15 | C   |
| ATOM | 3733 | CG2 | THR | A | 474 | 8.638  | -14.329 | 32.811 | 1.00 | 28.51 | C   |
| ATOM | 3734 | OG1 | THR | A | 474 | 9.997  | -12.748 | 34.084 | 1.00 | 29.10 | O   |
| ATOM | 3735 | N   | LYS | A | 475 | 6.000  | -12.011 | 34.856 | 1.00 | 26.00 | N   |
| ATOM | 3736 | CA  | LYS | A | 475 | 4.657  | -12.344 | 35.320 | 1.00 | 24.30 | C   |
| ATOM | 3737 | C   | LYS | A | 475 | 3.533  | -11.428 | 34.798 | 1.00 | 21.93 | C   |
| ATOM | 3738 | O   | LYS | A | 475 | 2.528  | -11.951 | 34.305 | 1.00 | 20.33 | O   |
| ATOM | 3739 | CB  | LYS | A | 475 | 4.636  | -12.427 | 36.858 | 1.00 | 25.66 | C   |
| ATOM | 3740 | CG  | LYS | A | 475 | 4.745  | -13.872 | 37.436 | 1.00 | 27.40 | C   |
| ATOM | 3741 | CD  | LYS | A | 475 | 6.131  | -14.541 | 37.206 | 1.00 | 29.53 | C   |
| ATOM | 3742 | CE  | LYS | A | 475 | 6.706  | -15.275 | 38.468 | 1.00 | 27.50 | C   |
| ATOM | 3743 | NZ  | LYS | A | 475 | 7.235  | -14.367 | 39.560 | 1.00 | 20.78 | N1+ |
| ATOM | 3744 | N   | CYS | A | 476 | 3.730  | -10.098 | 34.805 | 1.00 | 18.81 | N   |
| ATOM | 3745 | CA  | CYS | A | 476 | 2.672  | -9.129  | 34.411 | 1.00 | 14.74 | C   |
| ATOM | 3746 | C   | CYS | A | 476 | 2.446  | -9.020  | 32.891 | 1.00 | 14.14 | C   |
| ATOM | 3747 | O   | CYS | A | 476 | 1.340  | -8.728  | 32.413 | 1.00 | 10.01 | O   |
| ATOM | 3748 | CB  | CYS | A | 476 | 2.973  | -7.735  | 34.969 | 1.00 | 14.71 | C   |
| ATOM | 3749 | SG  | CYS | A | 476 | 2.665  | -7.476  | 36.756 | 1.00 | 17.94 | S   |
| ATOM | 3750 | N   | CYS | A | 477 | 3.502  | -9.291  | 32.135 | 1.00 | 14.05 | N   |
| ATOM | 3751 | CA  | CYS | A | 477 | 3.383  | -9.530  | 30.702 | 1.00 | 12.13 | C   |
| ATOM | 3752 | C   | CYS | A | 477 | 2.553  | -10.798 | 30.380 | 1.00 | 11.06 | C   |
| ATOM | 3753 | O   | CYS | A | 477 | 1.395  | -10.686 | 29.966 | 1.00 | 6.49  | O   |
| ATOM | 3754 | CB  | CYS | A | 477 | 4.794  | -9.588  | 30.090 | 1.00 | 13.42 | C   |
| ATOM | 3755 | SG  | CYS | A | 477 | 5.744  | -8.034  | 30.324 | 1.00 | 14.64 | S   |
| ATOM | 3756 | N   | THR | A | 478 | 3.070  | -11.969 | 30.755 | 1.00 | 11.58 | N   |
| ATOM | 3757 | CA  | THR | A | 478 | 2.425  | -13.263 | 30.481 | 1.00 | 14.89 | C   |
| ATOM | 3758 | C   | THR | A | 478 | 1.027  | -13.474 | 31.033 | 1.00 | 15.80 | C   |
| ATOM | 3759 | O   | THR | A | 478 | 0.194  | -14.100 | 30.369 | 1.00 | 16.44 | O   |
| ATOM | 3760 | CB  | THR | A | 478 | 3.241  | -14.447 | 31.035 | 1.00 | 18.24 | C   |

|      |      |     |     |   |     |        |         |        |      |       |     |
|------|------|-----|-----|---|-----|--------|---------|--------|------|-------|-----|
| ATOM | 3761 | CG2 | THR | A | 478 | 3.479  | -14.300 | 32.546 | 1.00 | 16.23 | C   |
| ATOM | 3762 | OG1 | THR | A | 478 | 2.514  | -15.661 | 30.807 | 1.00 | 19.21 | O   |
| ATOM | 3763 | N   | GLU | A | 479 | 0.903  | -13.261 | 32.343 | 1.00 | 15.82 | N   |
| ATOM | 3764 | CA  | GLU | A | 479 | -0.286 | -13.641 | 33.070 | 1.00 | 18.03 | C   |
| ATOM | 3765 | C   | GLU | A | 479 | -1.524 | -12.993 | 32.455 | 1.00 | 19.17 | C   |
| ATOM | 3766 | O   | GLU | A | 479 | -2.474 | -13.703 | 32.167 | 1.00 | 20.64 | O   |
| ATOM | 3767 | CB  | GLU | A | 479 | -0.144 | -13.319 | 34.572 | 1.00 | 20.48 | C   |
| ATOM | 3768 | CG  | GLU | A | 479 | 0.926  | -14.185 | 35.346 | 1.00 | 25.02 | C   |
| ATOM | 3769 | CD  | GLU | A | 479 | 0.428  | -15.556 | 35.910 | 1.00 | 26.36 | C   |
| ATOM | 3770 | OE1 | GLU | A | 479 | -0.438 | -15.569 | 36.819 | 1.00 | 27.61 | O   |
| ATOM | 3771 | OE2 | GLU | A | 479 | 1.014  | -16.614 | 35.558 | 1.00 | 23.89 | O1- |
| ATOM | 3772 | N   | SER | A | 480 | -1.476 | -11.697 | 32.129 | 1.00 | 21.19 | N   |
| ATOM | 3773 | CA  | SER | A | 480 | -2.479 | -11.102 | 31.229 | 1.00 | 23.00 | C   |
| ATOM | 3774 | C   | SER | A | 480 | -2.032 | -9.944  | 30.320 | 1.00 | 22.37 | C   |
| ATOM | 3775 | O   | SER | A | 480 | -1.343 | -9.022  | 30.768 | 1.00 | 23.67 | O   |
| ATOM | 3776 | CB  | SER | A | 480 | -3.703 | -10.633 | 32.019 | 1.00 | 25.73 | C   |
| ATOM | 3777 | OG  | SER | A | 480 | -4.717 | -10.096 | 31.159 | 1.00 | 24.90 | O   |
| ATOM | 3778 | N   | LEU | A | 481 | -2.642 | -9.900  | 29.133 | 1.00 | 18.32 | N   |
| ATOM | 3779 | CA  | LEU | A | 481 | -2.721 | -8.692  | 28.306 | 1.00 | 17.04 | C   |
| ATOM | 3780 | C   | LEU | A | 481 | -3.581 | -7.681  | 29.029 | 1.00 | 16.84 | C   |
| ATOM | 3781 | O   | LEU | A | 481 | -3.162 | -6.563  | 29.292 | 1.00 | 16.88 | O   |
| ATOM | 3782 | CB  | LEU | A | 481 | -3.392 | -8.992  | 26.950 | 1.00 | 12.89 | C   |
| ATOM | 3783 | CG  | LEU | A | 481 | -3.438 | -7.943  | 25.831 | 1.00 | 8.60  | C   |
| ATOM | 3784 | CD1 | LEU | A | 481 | -2.107 | -7.944  | 25.173 | 1.00 | 11.20 | C   |
| ATOM | 3785 | CD2 | LEU | A | 481 | -4.510 | -8.235  | 24.771 | 1.00 | 2.00  | C   |
| ATOM | 3786 | N   | VAL | A | 482 | -4.791 | -8.109  | 29.364 | 1.00 | 18.70 | N   |
| ATOM | 3787 | CA  | VAL | A | 482 | -5.873 | -7.205  | 29.741 | 1.00 | 17.38 | C   |
| ATOM | 3788 | C   | VAL | A | 482 | -5.656 | -6.631  | 31.146 | 1.00 | 15.41 | C   |
| ATOM | 3789 | O   | VAL | A | 482 | -6.034 | -5.490  | 31.420 | 1.00 | 12.39 | O   |
| ATOM | 3790 | CB  | VAL | A | 482 | -7.235 | -7.944  | 29.665 | 1.00 | 19.15 | C   |
| ATOM | 3791 | CG1 | VAL | A | 482 | -8.371 | -6.944  | 29.602 | 1.00 | 16.59 | C   |
| ATOM | 3792 | CG2 | VAL | A | 482 | -7.262 | -8.910  | 28.452 | 1.00 | 14.21 | C   |
| ATOM | 3793 | N   | ASN | A | 483 | -4.887 | -7.349  | 31.962 | 1.00 | 15.51 | N   |
| ATOM | 3794 | CA  | ASN | A | 483 | -4.543 | -6.871  | 33.313 | 1.00 | 19.45 | C   |
| ATOM | 3795 | C   | ASN | A | 483 | -3.117 | -6.282  | 33.448 | 1.00 | 18.86 | C   |
| ATOM | 3796 | O   | ASN | A | 483 | -2.541 | -6.286  | 34.527 | 1.00 | 18.09 | O   |
| ATOM | 3797 | CB  | ASN | A | 483 | -4.744 | -7.999  | 34.349 | 1.00 | 20.35 | C   |
| ATOM | 3798 | CG  | ASN | A | 483 | -6.101 | -8.689  | 34.212 | 1.00 | 23.29 | C   |
| ATOM | 3799 | ND2 | ASN | A | 483 | -7.134 | -8.065  | 34.770 | 1.00 | 23.14 | N   |
| ATOM | 3800 | OD1 | ASN | A | 483 | -6.232 | -9.728  | 33.544 | 1.00 | 20.79 | O   |
| ATOM | 3801 | N   | ARG | A | 484 | -2.627 | -5.632  | 32.400 | 1.00 | 19.94 | N   |
| ATOM | 3802 | CA  | ARG | A | 484 | -1.235 | -5.195  | 32.348 | 1.00 | 18.62 | C   |
| ATOM | 3803 | C   | ARG | A | 484 | -1.091 | -4.010  | 33.255 | 1.00 | 16.95 | C   |
| ATOM | 3804 | O   | ARG | A | 484 | -0.397 | -4.077  | 34.247 | 1.00 | 15.09 | O   |
| ATOM | 3805 | CB  | ARG | A | 484 | -0.844 | -4.773  | 30.920 | 1.00 | 22.74 | C   |
| ATOM | 3806 | CG  | ARG | A | 484 | 0.231  | -5.615  | 30.212 | 1.00 | 18.99 | C   |
| ATOM | 3807 | CD  | ARG | A | 484 | 0.209  | -5.384  | 28.687 | 1.00 | 16.43 | C   |
| ATOM | 3808 | NE  | ARG | A | 484 | 1.293  | -6.102  | 28.008 | 1.00 | 17.41 | N   |
| ATOM | 3809 | CZ  | ARG | A | 484 | 1.157  | -7.231  | 27.313 | 1.00 | 16.27 | C   |
| ATOM | 3810 | NH1 | ARG | A | 484 | -0.025 | -7.784  | 27.149 | 1.00 | 17.18 | N1+ |
| ATOM | 3811 | NH2 | ARG | A | 484 | 2.216  | -7.812  | 26.767 | 1.00 | 20.22 | N   |
| ATOM | 3812 | N   | ARG | A | 485 | -1.868 | -2.973  | 32.992 | 1.00 | 17.31 | N   |
| ATOM | 3813 | CA  | ARG | A | 485 | -1.641 | -1.679  | 33.626 | 1.00 | 19.94 | C   |
| ATOM | 3814 | C   | ARG | A | 485 | -2.259 | -1.408  | 35.051 | 1.00 | 22.79 | C   |
| ATOM | 3815 | O   | ARG | A | 485 | -1.991 | -0.351  | 35.670 | 1.00 | 22.25 | O   |
| ATOM | 3816 | CB  | ARG | A | 485 | -2.043 | -0.583  | 32.637 | 1.00 | 16.29 | C   |
| ATOM | 3817 | CG  | ARG | A | 485 | -1.603 | 0.799   | 33.039 | 1.00 | 16.70 | C   |
| ATOM | 3818 | CD  | ARG | A | 485 | -2.801 | 1.708   | 33.276 | 1.00 | 15.57 | C   |
| ATOM | 3819 | NE  | ARG | A | 485 | -3.930 | 1.020   | 33.887 | 1.00 | 12.17 | N   |
| ATOM | 3820 | CZ  | ARG | A | 485 | -4.215 | 1.091   | 35.173 | 1.00 | 11.81 | C   |
| ATOM | 3821 | NH1 | ARG | A | 485 | -3.411 | 1.751   | 35.978 | 1.00 | 15.13 | N1+ |
| ATOM | 3822 | NH2 | ARG | A | 485 | -5.192 | 0.371   | 35.680 | 1.00 | 12.58 | N   |
| ATOM | 3823 | N   | PRO | A | 486 | -3.067 | -2.350  | 35.598 | 1.00 | 22.59 | N   |
| ATOM | 3824 | CA  | PRO | A | 486 | -3.024 | -2.488  | 37.067 | 1.00 | 23.53 | C   |
| ATOM | 3825 | C   | PRO | A | 486 | -2.092 | -3.558  | 37.639 | 1.00 | 21.48 | C   |
| ATOM | 3826 | O   | PRO | A | 486 | -2.263 | -3.997  | 38.779 | 1.00 | 18.78 | O   |
| ATOM | 3827 | CB  | PRO | A | 486 | -4.489 | -2.756  | 37.448 | 1.00 | 23.69 | C   |
| ATOM | 3828 | CG  | PRO | A | 486 | -5.101 | -3.264  | 36.224 | 1.00 | 19.85 | C   |
| ATOM | 3829 | CD  | PRO | A | 486 | -4.446 | -2.530  | 35.110 | 1.00 | 22.51 | C   |
| ATOM | 3830 | N   | CYS | A | 487 | -1.118 | -3.982  | 36.846 | 1.00 | 19.53 | N   |
| ATOM | 3831 | CA  | CYS | A | 487 | -0.170 | -4.986  | 37.304 | 1.00 | 19.20 | C   |



|      |      |     |     |   |     |        |        |        |      |       |     |
|------|------|-----|-----|---|-----|--------|--------|--------|------|-------|-----|
| ATOM | 3832 | C   | CYS | A | 487 | 1.135  | -4.343 | 37.720 | 1.00 | 20.85 | C   |
| ATOM | 3833 | O   | CYS | A | 487 | 1.389  | -4.179 | 38.908 | 1.00 | 24.17 | O   |
| ATOM | 3834 | CB  | CYS | A | 487 | 0.102  | -6.004 | 36.223 | 1.00 | 15.12 | C   |
| ATOM | 3835 | SG  | CYS | A | 487 | 0.659  | -7.543 | 36.947 | 1.00 | 12.46 | S   |
| ATOM | 3836 | N   | PHE | A | 488 | 1.882  | -3.834 | 36.745 | 1.00 | 21.06 | N   |
| ATOM | 3837 | CA  | PHE | A | 488 | 3.057  | -3.030 | 37.018 | 1.00 | 16.19 | C   |
| ATOM | 3838 | C   | PHE | A | 488 | 2.761  | -2.078 | 38.133 | 1.00 | 16.14 | C   |
| ATOM | 3839 | O   | PHE | A | 488 | 3.334  | -2.231 | 39.193 | 1.00 | 16.21 | O   |
| ATOM | 3840 | CB  | PHE | A | 488 | 3.487  | -2.282 | 35.767 | 1.00 | 15.68 | C   |
| ATOM | 3841 | CG  | PHE | A | 488 | 4.434  | -3.072 | 34.917 | 1.00 | 18.17 | C   |
| ATOM | 3842 | CD1 | PHE | A | 488 | 3.953  | -4.049 | 34.066 | 1.00 | 14.32 | C   |
| ATOM | 3843 | CD2 | PHE | A | 488 | 5.800  | -3.027 | 35.173 | 1.00 | 15.88 | C   |
| ATOM | 3844 | CE1 | PHE | A | 488 | 4.799  | -4.961 | 33.530 | 1.00 | 13.05 | C   |
| ATOM | 3845 | CE2 | PHE | A | 488 | 6.638  | -3.937 | 34.632 | 1.00 | 7.89  | C   |
| ATOM | 3846 | CZ  | PHE | A | 488 | 6.142  | -4.907 | 33.821 | 1.00 | 11.30 | C   |
| ATOM | 3847 | N   | SER | A | 489 | 1.648  | -1.356 | 37.989 | 1.00 | 16.65 | N   |
| ATOM | 3848 | CA  | SER | A | 489 | 1.124  | -0.449 | 39.020 | 1.00 | 14.57 | C   |
| ATOM | 3849 | C   | SER | A | 489 | 1.020  | -1.124 | 40.400 | 1.00 | 14.49 | C   |
| ATOM | 3850 | O   | SER | A | 489 | 1.604  | -0.644 | 41.368 | 1.00 | 14.95 | O   |
| ATOM | 3851 | CB  | SER | A | 489 | -0.261 | 0.084  | 38.606 | 1.00 | 13.40 | C   |
| ATOM | 3852 | OG  | SER | A | 489 | -0.220 | 0.832  | 37.402 | 1.00 | 9.27  | O   |
| ATOM | 3853 | N   | ALA | A | 490 | 0.329  | -2.264 | 40.471 | 1.00 | 14.36 | N   |
| ATOM | 3854 | CA  | ALA | A | 490 | 0.018  | -2.922 | 41.746 | 1.00 | 14.42 | C   |
| ATOM | 3855 | C   | ALA | A | 490 | 1.174  | -3.786 | 42.177 | 1.00 | 15.92 | C   |
| ATOM | 3856 | O   | ALA | A | 490 | 1.016  | -4.996 | 42.395 | 1.00 | 16.03 | O   |
| ATOM | 3857 | CB  | ALA | A | 490 | -1.233 | -3.764 | 41.628 | 1.00 | 14.31 | C   |
| ATOM | 3858 | N   | LEU | A | 491 | 2.275  | -3.111 | 42.483 | 1.00 | 16.50 | N   |
| ATOM | 3859 | CA  | LEU | A | 491 | 3.582  | -3.730 | 42.630 | 1.00 | 17.68 | C   |
| ATOM | 3860 | C   | LEU | A | 491 | 4.264  | -2.722 | 43.515 | 1.00 | 18.16 | C   |
| ATOM | 3861 | O   | LEU | A | 491 | 4.181  | -1.532 | 43.235 | 1.00 | 19.45 | O   |
| ATOM | 3862 | CB  | LEU | A | 491 | 4.274  | -3.755 | 41.260 | 1.00 | 18.42 | C   |
| ATOM | 3863 | CG  | LEU | A | 491 | 5.176  | -4.844 | 40.673 | 1.00 | 19.23 | C   |
| ATOM | 3864 | CD1 | LEU | A | 491 | 4.410  | -6.103 | 40.303 | 1.00 | 19.20 | C   |
| ATOM | 3865 | CD2 | LEU | A | 491 | 5.816  | -4.257 | 39.436 | 1.00 | 21.21 | C   |
| ATOM | 3866 | N   | GLU | A | 492 | 4.742  | -3.138 | 44.677 | 1.00 | 17.64 | N   |
| ATOM | 3867 | CA  | GLU | A | 492 | 5.441  | -2.176 | 45.526 | 1.00 | 20.34 | C   |
| ATOM | 3868 | C   | GLU | A | 492 | 6.920  | -2.316 | 45.191 | 1.00 | 20.14 | C   |
| ATOM | 3869 | O   | GLU | A | 492 | 7.255  | -2.927 | 44.186 | 1.00 | 18.77 | O   |
| ATOM | 3870 | CB  | GLU | A | 492 | 5.143  | -2.414 | 47.033 | 1.00 | 20.09 | C   |
| ATOM | 3871 | CG  | GLU | A | 492 | 3.620  | -2.630 | 47.374 | 1.00 | 24.17 | C   |
| ATOM | 3872 | CD  | GLU | A | 492 | 2.836  | -1.411 | 47.983 | 1.00 | 25.80 | C   |
| ATOM | 3873 | OE1 | GLU | A | 492 | 3.305  | -0.784 | 48.959 | 1.00 | 27.22 | O   |
| ATOM | 3874 | OE2 | GLU | A | 492 | 1.648  | -1.216 | 47.614 | 1.00 | 24.48 | O1- |
| ATOM | 3875 | N   | VAL | A | 493 | 7.786  | -1.623 | 45.924 | 1.00 | 21.53 | N   |
| ATOM | 3876 | CA  | VAL | A | 493 | 9.231  | -1.795 | 45.779 | 1.00 | 20.93 | C   |
| ATOM | 3877 | C   | VAL | A | 493 | 9.635  | -3.247 | 46.044 | 1.00 | 22.35 | C   |
| ATOM | 3878 | O   | VAL | A | 493 | 9.525  | -3.722 | 47.170 | 1.00 | 24.31 | O   |
| ATOM | 3879 | CB  | VAL | A | 493 | 9.982  | -0.910 | 46.767 | 1.00 | 18.51 | C   |
| ATOM | 3880 | CG1 | VAL | A | 493 | 11.487 | -1.196 | 46.692 | 1.00 | 19.04 | C   |
| ATOM | 3881 | CG2 | VAL | A | 493 | 9.666  | 0.552  | 46.492 | 1.00 | 17.43 | C   |
| ATOM | 3882 | N   | ASP | A | 494 | 10.093 | -3.951 | 45.016 | 1.00 | 24.29 | N   |
| ATOM | 3883 | CA  | ASP | A | 494 | 10.404 | -5.382 | 45.148 | 1.00 | 25.27 | C   |
| ATOM | 3884 | C   | ASP | A | 494 | 11.691 | -5.486 | 45.946 | 1.00 | 23.84 | C   |
| ATOM | 3885 | O   | ASP | A | 494 | 12.763 | -5.666 | 45.375 | 1.00 | 22.03 | O   |
| ATOM | 3886 | CB  | ASP | A | 494 | 10.603 | -6.067 | 43.764 | 1.00 | 25.69 | C   |
| ATOM | 3887 | CG  | ASP | A | 494 | 9.375  | -5.952 | 42.826 | 1.00 | 21.60 | C   |
| ATOM | 3888 | OD1 | ASP | A | 494 | 8.405  | -5.219 | 43.111 | 1.00 | 20.70 | O   |
| ATOM | 3889 | OD2 | ASP | A | 494 | 9.391  | -6.593 | 41.768 | 1.00 | 16.55 | O1- |
| ATOM | 3890 | N   | GLU | A | 495 | 11.558 | -5.460 | 47.270 | 1.00 | 24.75 | N   |
| ATOM | 3891 | CA  | GLU | A | 495 | 12.703 | -5.461 | 48.188 | 1.00 | 25.22 | C   |
| ATOM | 3892 | C   | GLU | A | 495 | 13.578 | -6.701 | 48.020 | 1.00 | 25.09 | C   |
| ATOM | 3893 | O   | GLU | A | 495 | 14.671 | -6.793 | 48.586 | 1.00 | 23.87 | O   |
| ATOM | 3894 | CB  | GLU | A | 495 | 12.229 | -5.334 | 49.644 | 1.00 | 25.31 | C   |
| ATOM | 3895 | CG  | GLU | A | 495 | 11.358 | -4.089 | 49.951 | 1.00 | 22.81 | C   |
| ATOM | 3896 | CD  | GLU | A | 495 | 9.976  | -4.443 | 50.509 | 1.00 | 23.79 | C   |
| ATOM | 3897 | OE1 | GLU | A | 495 | 9.639  | -5.650 | 50.564 | 1.00 | 20.96 | O   |
| ATOM | 3898 | OE2 | GLU | A | 495 | 9.223  | -3.511 | 50.885 | 1.00 | 22.17 | O1- |
| ATOM | 3899 | N   | THR | A | 496 | 13.107 | -7.595 | 47.149 | 1.00 | 26.34 | N   |
| ATOM | 3900 | CA  | THR | A | 496 | 13.866 | -8.694 | 46.535 | 1.00 | 23.22 | C   |
| ATOM | 3901 | C   | THR | A | 496 | 15.335 | -8.416 | 46.231 | 1.00 | 22.62 | C   |
| ATOM | 3902 | O   | THR | A | 496 | 16.150 | -9.331 | 46.277 | 1.00 | 22.94 | O   |

|      |      |     |     |   |     |        |         |        |      |       |     |
|------|------|-----|-----|---|-----|--------|---------|--------|------|-------|-----|
| ATOM | 3903 | CB  | THR | A | 496 | 13.187 | -9.146  | 45.199 | 1.00 | 21.63 | C   |
| ATOM | 3904 | CG2 | THR | A | 496 | 12.732 | -10.581 | 45.296 | 1.00 | 21.18 | C   |
| ATOM | 3905 | OG1 | THR | A | 496 | 12.060 | -8.302  | 44.898 | 1.00 | 16.30 | O   |
| ATOM | 3906 | N   | TYR | A | 497 | 15.661 | -7.150  | 45.975 | 1.00 | 22.20 | N   |
| ATOM | 3907 | CA  | TYR | A | 497 | 16.844 | -6.768  | 45.215 | 1.00 | 23.14 | C   |
| ATOM | 3908 | C   | TYR | A | 497 | 18.148 | -7.505  | 45.559 | 1.00 | 25.54 | C   |
| ATOM | 3909 | O   | TYR | A | 497 | 18.420 | -8.588  | 45.015 | 1.00 | 24.48 | O   |
| ATOM | 3910 | CB  | TYR | A | 497 | 17.055 | -5.256  | 45.330 | 1.00 | 23.83 | C   |
| ATOM | 3911 | CG  | TYR | A | 497 | 17.784 | -4.607  | 44.155 | 1.00 | 25.67 | C   |
| ATOM | 3912 | CD1 | TYR | A | 497 | 17.903 | -5.248  | 42.939 | 1.00 | 26.17 | C   |
| ATOM | 3913 | CD2 | TYR | A | 497 | 18.419 | -3.381  | 44.302 | 1.00 | 24.70 | C   |
| ATOM | 3914 | CE1 | TYR | A | 497 | 18.656 | -4.699  | 41.917 | 1.00 | 27.56 | C   |
| ATOM | 3915 | CE2 | TYR | A | 497 | 19.163 | -2.831  | 43.293 | 1.00 | 24.84 | C   |
| ATOM | 3916 | CZ  | TYR | A | 497 | 19.298 | -3.496  | 42.103 | 1.00 | 27.12 | C   |
| ATOM | 3917 | OH  | TYR | A | 497 | 20.187 | -3.028  | 41.144 | 1.00 | 25.38 | O   |
| ATOM | 3918 | N   | VAL | A | 498 | 18.915 | -6.947  | 46.504 | 1.00 | 26.48 | N   |
| ATOM | 3919 | CA  | VAL | A | 498 | 20.386 | -7.050  | 46.515 | 1.00 | 25.76 | C   |
| ATOM | 3920 | C   | VAL | A | 498 | 20.815 | -6.909  | 45.059 | 1.00 | 27.52 | C   |
| ATOM | 3921 | O   | VAL | A | 498 | 20.314 | -6.011  | 44.377 | 1.00 | 26.89 | O   |
| ATOM | 3922 | CB  | VAL | A | 498 | 20.934 | -8.371  | 47.162 | 1.00 | 25.41 | C   |
| ATOM | 3923 | CG1 | VAL | A | 498 | 22.373 | -8.146  | 47.637 | 1.00 | 23.31 | C   |
| ATOM | 3924 | CG2 | VAL | A | 498 | 20.075 | -8.802  | 48.361 | 1.00 | 25.94 | C   |
| ATOM | 3925 | N   | PRO | A | 499 | 21.622 | -7.846  | 44.516 | 1.00 | 30.00 | N   |
| ATOM | 3926 | CA  | PRO | A | 499 | 22.892 | -7.469  | 43.868 | 1.00 | 29.18 | C   |
| ATOM | 3927 | C   | PRO | A | 499 | 23.366 | -6.065  | 44.192 | 1.00 | 29.84 | C   |
| ATOM | 3928 | O   | PRO | A | 499 | 24.553 | -5.856  | 44.419 | 1.00 | 32.19 | O   |
| ATOM | 3929 | CB  | PRO | A | 499 | 22.589 | -7.640  | 42.383 | 1.00 | 29.25 | C   |
| ATOM | 3930 | CG  | PRO | A | 499 | 21.521 | -8.787  | 42.353 | 1.00 | 31.67 | C   |
| ATOM | 3931 | CD  | PRO | A | 499 | 21.046 | -9.013  | 43.821 | 1.00 | 29.92 | C   |
| ATOM | 3932 | N   | LYS | A | 500 | 22.480 | -5.092  | 44.014 | 1.00 | 29.43 | N   |
| ATOM | 3933 | CA  | LYS | A | 500 | 22.604 | -3.779  | 44.641 | 1.00 | 28.77 | C   |
| ATOM | 3934 | C   | LYS | A | 500 | 23.964 | -3.178  | 44.341 | 1.00 | 29.16 | C   |
| ATOM | 3935 | O   | LYS | A | 500 | 24.597 | -2.585  | 45.213 | 1.00 | 31.34 | O   |
| ATOM | 3936 | CB  | LYS | A | 500 | 22.376 | -3.880  | 46.153 | 1.00 | 25.37 | C   |
| ATOM | 3937 | CG  | LYS | A | 500 | 21.848 | -2.597  | 46.770 | 1.00 | 23.83 | C   |
| ATOM | 3938 | CD  | LYS | A | 500 | 21.013 | -2.876  | 48.001 | 1.00 | 24.99 | C   |
| ATOM | 3939 | CE  | LYS | A | 500 | 19.991 | -3.991  | 47.712 | 1.00 | 29.69 | C   |
| ATOM | 3940 | NZ  | LYS | A | 500 | 18.606 | -3.820  | 48.316 | 1.00 | 30.96 | N1+ |
| ATOM | 3941 | N   | GLU | A | 501 | 24.456 | -3.494  | 43.144 | 1.00 | 28.36 | N   |
| ATOM | 3942 | CA  | GLU | A | 501 | 25.733 | -3.020  | 42.626 | 1.00 | 27.10 | C   |
| ATOM | 3943 | C   | GLU | A | 501 | 26.219 | -1.775  | 43.365 | 1.00 | 23.87 | C   |
| ATOM | 3944 | O   | GLU | A | 501 | 25.440 | -0.854  | 43.611 | 1.00 | 24.20 | O   |
| ATOM | 3945 | CB  | GLU | A | 501 | 25.583 | -2.722  | 41.120 | 1.00 | 28.81 | C   |
| ATOM | 3946 | CG  | GLU | A | 501 | 26.853 | -2.919  | 40.279 | 1.00 | 27.95 | C   |
| ATOM | 3947 | CD  | GLU | A | 501 | 26.979 | -4.325  | 39.717 | 1.00 | 26.77 | C   |
| ATOM | 3948 | OE1 | GLU | A | 501 | 25.944 | -4.926  | 39.354 | 1.00 | 26.88 | O   |
| ATOM | 3949 | OE2 | GLU | A | 501 | 28.114 | -4.842  | 39.661 | 1.00 | 27.69 | O1- |
| ATOM | 3950 | N   | PHE | A | 502 | 27.466 | -1.790  | 43.799 | 1.00 | 19.52 | N   |
| ATOM | 3951 | CA  | PHE | A | 502 | 28.068 | -0.583  | 44.320 | 1.00 | 21.84 | C   |
| ATOM | 3952 | C   | PHE | A | 502 | 29.008 | 0.086   | 43.277 | 1.00 | 22.82 | C   |
| ATOM | 3953 | O   | PHE | A | 502 | 29.712 | -0.598  | 42.551 | 1.00 | 24.52 | O   |
| ATOM | 3954 | CB  | PHE | A | 502 | 28.827 | -0.921  | 45.617 | 1.00 | 22.57 | C   |
| ATOM | 3955 | CG  | PHE | A | 502 | 28.007 | -0.747  | 46.897 | 1.00 | 24.13 | C   |
| ATOM | 3956 | CD1 | PHE | A | 502 | 26.662 | -0.372  | 46.856 | 1.00 | 20.81 | C   |
| ATOM | 3957 | CD2 | PHE | A | 502 | 28.627 | -0.839  | 48.149 | 1.00 | 22.46 | C   |
| ATOM | 3958 | CE1 | PHE | A | 502 | 25.976 | -0.085  | 48.030 | 1.00 | 19.06 | C   |
| ATOM | 3959 | CE2 | PHE | A | 502 | 27.937 | -0.544  | 49.329 | 1.00 | 18.64 | C   |
| ATOM | 3960 | CZ  | PHE | A | 502 | 26.621 | -0.165  | 49.266 | 1.00 | 19.92 | C   |
| ATOM | 3961 | N   | ASN | A | 503 | 28.876 | 1.392   | 43.069 | 1.00 | 22.88 | N   |
| ATOM | 3962 | CA  | ASN | A | 503 | 30.017 | 2.214   | 42.668 | 1.00 | 24.10 | C   |
| ATOM | 3963 | C   | ASN | A | 503 | 30.509 | 2.157   | 41.188 | 1.00 | 25.87 | C   |
| ATOM | 3964 | O   | ASN | A | 503 | 31.690 | 2.401   | 40.905 | 1.00 | 24.39 | O   |
| ATOM | 3965 | CB  | ASN | A | 503 | 31.167 | 1.906   | 43.630 | 1.00 | 24.77 | C   |
| ATOM | 3966 | CG  | ASN | A | 503 | 30.765 | 2.064   | 45.094 | 1.00 | 25.30 | C   |
| ATOM | 3967 | ND2 | ASN | A | 503 | 31.270 | 1.181   | 45.961 | 1.00 | 25.44 | N   |
| ATOM | 3968 | OD1 | ASN | A | 503 | 30.024 | 2.978   | 45.442 | 1.00 | 26.75 | O   |
| ATOM | 3969 | N   | ALA | A | 504 | 29.564 | 2.196   | 40.254 | 1.00 | 28.88 | N   |
| ATOM | 3970 | CA  | ALA | A | 504 | 29.804 | 1.734   | 38.874 | 1.00 | 31.13 | C   |
| ATOM | 3971 | C   | ALA | A | 504 | 30.300 | 2.776   | 37.823 | 1.00 | 31.37 | C   |
| ATOM | 3972 | O   | ALA | A | 504 | 29.549 | 3.108   | 36.885 | 1.00 | 29.77 | O   |
| ATOM | 3973 | CB  | ALA | A | 504 | 28.522 | 1.003   | 38.351 | 1.00 | 29.20 | C   |

|      |      |     |     |   |     |        |        |        |      |       |     |
|------|------|-----|-----|---|-----|--------|--------|--------|------|-------|-----|
| ATOM | 3974 | N   | GLU | A | 505 | 31.615 | 3.064  | 37.847 | 1.00 | 31.12 | N   |
| ATOM | 3975 | CA  | GLU | A | 505 | 32.305 | 4.005  | 36.923 | 1.00 | 30.29 | C   |
| ATOM | 3976 | C   | GLU | A | 505 | 32.672 | 3.490  | 35.500 | 1.00 | 30.54 | C   |
| ATOM | 3977 | O   | GLU | A | 505 | 33.795 | 3.603  | 35.040 | 1.00 | 30.90 | O   |
| ATOM | 3978 | CB  | GLU | A | 505 | 33.555 | 4.579  | 37.623 | 1.00 | 29.84 | C   |
| ATOM | 3979 | CG  | GLU | A | 505 | 34.522 | 5.484  | 36.794 | 1.00 | 30.64 | C   |
| ATOM | 3980 | CD  | GLU | A | 505 | 33.845 | 6.636  | 36.067 | 1.00 | 30.76 | C   |
| ATOM | 3981 | OE1 | GLU | A | 505 | 32.604 | 6.713  | 36.126 | 1.00 | 33.58 | O   |
| ATOM | 3982 | OE2 | GLU | A | 505 | 34.546 | 7.445  | 35.405 | 1.00 | 27.70 | O1- |
| ATOM | 3983 | N   | THR | A | 506 | 31.770 | 2.737  | 34.900 | 1.00 | 32.72 | N   |
| ATOM | 3984 | CA  | THR | A | 506 | 31.498 | 2.842  | 33.477 | 1.00 | 30.71 | C   |
| ATOM | 3985 | C   | THR | A | 506 | 30.144 | 3.518  | 33.584 | 1.00 | 30.02 | C   |
| ATOM | 3986 | O   | THR | A | 506 | 29.098 | 2.881  | 33.485 | 1.00 | 30.52 | O   |
| ATOM | 3987 | CB  | THR | A | 506 | 31.347 | 1.480  | 32.857 | 1.00 | 31.87 | C   |
| ATOM | 3988 | CG2 | THR | A | 506 | 30.724 | 1.603  | 31.495 | 1.00 | 32.08 | C   |
| ATOM | 3989 | OG1 | THR | A | 506 | 32.644 | 0.859  | 32.776 | 1.00 | 33.97 | O   |
| ATOM | 3990 | N   | PHE | A | 507 | 30.249 | 4.657  | 34.251 | 1.00 | 28.98 | N   |
| ATOM | 3991 | CA  | PHE | A | 507 | 29.169 | 5.342  | 34.917 | 1.00 | 26.92 | C   |
| ATOM | 3992 | C   | PHE | A | 507 | 29.075 | 6.625  | 34.106 | 1.00 | 25.90 | C   |
| ATOM | 3993 | O   | PHE | A | 507 | 28.730 | 6.586  | 32.917 | 1.00 | 22.64 | O   |
| ATOM | 3994 | CB  | PHE | A | 507 | 29.648 | 5.661  | 36.330 | 1.00 | 27.01 | C   |
| ATOM | 3995 | CG  | PHE | A | 507 | 28.600 | 6.192  | 37.248 | 1.00 | 28.40 | C   |
| ATOM | 3996 | CD1 | PHE | A | 507 | 27.527 | 6.923  | 36.778 | 1.00 | 26.26 | C   |
| ATOM | 3997 | CD2 | PHE | A | 507 | 28.789 | 6.093  | 38.622 | 1.00 | 28.34 | C   |
| ATOM | 3998 | CE1 | PHE | A | 507 | 26.673 | 7.551  | 37.666 | 1.00 | 28.02 | C   |
| ATOM | 3999 | CE2 | PHE | A | 507 | 27.934 | 6.718  | 39.511 | 1.00 | 26.64 | C   |
| ATOM | 4000 | CZ  | PHE | A | 507 | 26.882 | 7.446  | 39.035 | 1.00 | 26.34 | C   |
| ATOM | 4001 | N   | THR | A | 508 | 29.795 | 7.615  | 34.624 | 1.00 | 23.79 | N   |
| ATOM | 4002 | CA  | THR | A | 508 | 29.605 | 9.007  | 34.270 | 1.00 | 25.58 | C   |
| ATOM | 4003 | C   | THR | A | 508 | 30.579 | 9.372  | 33.153 | 1.00 | 24.27 | C   |
| ATOM | 4004 | O   | THR | A | 508 | 31.651 | 9.945  | 33.379 | 1.00 | 19.34 | O   |
| ATOM | 4005 | CB  | THR | A | 508 | 29.824 | 9.898  | 35.522 | 1.00 | 27.81 | C   |
| ATOM | 4006 | CG2 | THR | A | 508 | 29.006 | 11.184 | 35.427 | 1.00 | 27.64 | C   |
| ATOM | 4007 | OG1 | THR | A | 508 | 29.411 | 9.172  | 36.692 | 1.00 | 27.38 | O   |
| ATOM | 4008 | N   | PHE | A | 509 | 30.175 | 9.076  | 31.927 | 1.00 | 26.09 | N   |
| ATOM | 4009 | CA  | PHE | A | 509 | 31.089 | 9.209  | 30.800 | 1.00 | 29.27 | C   |
| ATOM | 4010 | C   | PHE | A | 509 | 31.562 | 10.649 | 30.558 | 1.00 | 29.37 | C   |
| ATOM | 4011 | O   | PHE | A | 509 | 32.470 | 10.857 | 29.742 | 1.00 | 29.22 | O   |
| ATOM | 4012 | CB  | PHE | A | 509 | 30.475 | 8.578  | 29.519 | 1.00 | 28.61 | C   |
| ATOM | 4013 | CG  | PHE | A | 509 | 29.409 | 9.410  | 28.848 | 1.00 | 30.39 | C   |
| ATOM | 4014 | CD1 | PHE | A | 509 | 29.751 | 10.520 | 28.076 | 1.00 | 31.31 | C   |
| ATOM | 4015 | CD2 | PHE | A | 509 | 28.107 | 8.935  | 28.764 | 1.00 | 31.82 | C   |
| ATOM | 4016 | CE1 | PHE | A | 509 | 28.831 | 11.131 | 27.223 | 1.00 | 29.90 | C   |
| ATOM | 4017 | CE2 | PHE | A | 509 | 27.170 | 9.543  | 27.906 | 1.00 | 31.41 | C   |
| ATOM | 4018 | CZ  | PHE | A | 509 | 27.541 | 10.639 | 27.136 | 1.00 | 31.04 | C   |
| ATOM | 4019 | N   | HIS | A | 510 | 31.160 | 11.554 | 31.466 | 1.00 | 28.52 | N   |
| ATOM | 4020 | CA  | HIS | A | 510 | 31.106 | 13.001 | 31.228 | 1.00 | 26.73 | C   |
| ATOM | 4021 | C   | HIS | A | 510 | 31.430 | 13.363 | 29.766 | 1.00 | 27.36 | C   |
| ATOM | 4022 | O   | HIS | A | 510 | 30.619 | 13.094 | 28.892 | 1.00 | 27.39 | O   |
| ATOM | 4023 | CB  | HIS | A | 510 | 32.021 | 13.738 | 32.212 | 1.00 | 24.61 | C   |
| ATOM | 4024 | CG  | HIS | A | 510 | 32.016 | 15.224 | 32.042 | 1.00 | 23.20 | C   |
| ATOM | 4025 | CD2 | HIS | A | 510 | 31.108 | 16.156 | 32.409 | 1.00 | 19.13 | C   |
| ATOM | 4026 | ND1 | HIS | A | 510 | 32.998 | 15.900 | 31.348 | 1.00 | 23.83 | N   |
| ATOM | 4027 | CE1 | HIS | A | 510 | 32.685 | 17.177 | 31.279 | 1.00 | 20.37 | C   |
| ATOM | 4028 | NE2 | HIS | A | 510 | 31.546 | 17.360 | 31.923 | 1.00 | 18.67 | N   |
| ATOM | 4029 | N   | ALA | A | 511 | 32.650 | 13.831 | 29.490 | 1.00 | 26.47 | N   |
| ATOM | 4030 | CA  | ALA | A | 511 | 33.110 | 14.040 | 28.119 | 1.00 | 26.06 | C   |
| ATOM | 4031 | C   | ALA | A | 511 | 32.517 | 15.279 | 27.427 | 1.00 | 28.02 | C   |
| ATOM | 4032 | O   | ALA | A | 511 | 32.011 | 15.182 | 26.314 | 1.00 | 30.20 | O   |
| ATOM | 4033 | CB  | ALA | A | 511 | 32.831 | 12.774 | 27.276 | 1.00 | 22.01 | C   |
| ATOM | 4034 | N   | ASP | A | 512 | 32.665 | 16.458 | 28.031 | 1.00 | 27.66 | N   |
| ATOM | 4035 | CA  | ASP | A | 512 | 31.940 | 17.650 | 27.558 | 1.00 | 26.35 | C   |
| ATOM | 4036 | C   | ASP | A | 512 | 30.605 | 17.315 | 26.859 | 1.00 | 25.46 | C   |
| ATOM | 4037 | O   | ASP | A | 512 | 30.404 | 17.662 | 25.687 | 1.00 | 22.46 | O   |
| ATOM | 4038 | CB  | ASP | A | 512 | 32.822 | 18.475 | 26.622 | 1.00 | 28.10 | C   |
| ATOM | 4039 | CG  | ASP | A | 512 | 32.789 | 19.984 | 26.933 | 1.00 | 30.49 | C   |
| ATOM | 4040 | OD1 | ASP | A | 512 | 32.547 | 20.373 | 28.103 | 1.00 | 27.50 | O   |
| ATOM | 4041 | OD2 | ASP | A | 512 | 33.113 | 20.783 | 26.011 | 1.00 | 31.67 | O1- |
| ATOM | 4042 | N   | ILE | A | 513 | 29.781 | 16.505 | 27.545 | 1.00 | 24.03 | N   |
| ATOM | 4043 | CA  | ILE | A | 513 | 28.389 | 16.258 | 27.174 | 1.00 | 18.35 | C   |
| ATOM | 4044 | C   | ILE | A | 513 | 27.730 | 17.571 | 26.913 | 1.00 | 19.35 | C   |

|      |      |     |     |   |     |        |        |        |      |       |     |
|------|------|-----|-----|---|-----|--------|--------|--------|------|-------|-----|
| ATOM | 4045 | O   | ILE | A | 513 | 26.907 | 17.671 | 26.015 | 1.00 | 19.34 | O   |
| ATOM | 4046 | CB  | ILE | A | 513 | 27.557 | 15.616 | 28.278 | 1.00 | 16.43 | C   |
| ATOM | 4047 | CG1 | ILE | A | 513 | 28.316 | 14.488 | 28.959 | 1.00 | 16.18 | C   |
| ATOM | 4048 | CG2 | ILE | A | 513 | 26.270 | 15.102 | 27.670 | 1.00 | 18.39 | C   |
| ATOM | 4049 | CD1 | ILE | A | 513 | 27.473 | 13.550 | 29.809 | 1.00 | 14.73 | C   |
| ATOM | 4050 | N   | CYS | A | 514 | 27.917 | 18.494 | 27.857 | 1.00 | 19.00 | N   |
| ATOM | 4051 | CA  | CYS | A | 514 | 27.567 | 19.896 | 27.650 | 1.00 | 20.07 | C   |
| ATOM | 4052 | C   | CYS | A | 514 | 28.126 | 20.289 | 26.300 | 1.00 | 22.50 | C   |
| ATOM | 4053 | O   | CYS | A | 514 | 29.334 | 20.276 | 26.095 | 1.00 | 23.48 | O   |
| ATOM | 4054 | CB  | CYS | A | 514 | 28.217 | 20.768 | 28.708 | 1.00 | 17.67 | C   |
| ATOM | 4055 | SG  | CYS | A | 514 | 30.001 | 20.505 | 28.723 | 1.00 | 18.01 | S   |
| ATOM | 4056 | N   | THR | A | 515 | 27.228 | 20.406 | 25.335 | 1.00 | 25.46 | N   |
| ATOM | 4057 | CA  | THR | A | 515 | 27.580 | 20.748 | 23.970 | 1.00 | 26.86 | C   |
| ATOM | 4058 | C   | THR | A | 515 | 28.699 | 19.896 | 23.361 | 1.00 | 26.41 | C   |
| ATOM | 4059 | O   | THR | A | 515 | 29.493 | 20.391 | 22.563 | 1.00 | 28.04 | O   |
| ATOM | 4060 | CB  | THR | A | 515 | 27.885 | 22.263 | 23.827 | 1.00 | 28.89 | C   |
| ATOM | 4061 | CG2 | THR | A | 515 | 26.576 | 23.040 | 23.525 | 1.00 | 29.83 | C   |
| ATOM | 4062 | OG1 | THR | A | 515 | 28.464 | 22.767 | 25.042 | 1.00 | 32.17 | O   |
| ATOM | 4063 | N   | LEU | A | 516 | 28.791 | 18.639 | 23.804 | 1.00 | 22.97 | N   |
| ATOM | 4064 | CA  | LEU | A | 516 | 28.855 | 17.500 | 22.881 | 1.00 | 20.76 | C   |
| ATOM | 4065 | C   | LEU | A | 516 | 27.510 | 17.536 | 22.152 | 1.00 | 20.35 | C   |
| ATOM | 4066 | O   | LEU | A | 516 | 27.427 | 17.980 | 21.001 | 1.00 | 19.65 | O   |
| ATOM | 4067 | CB  | LEU | A | 516 | 28.905 | 16.167 | 23.656 | 1.00 | 18.70 | C   |
| ATOM | 4068 | CG  | LEU | A | 516 | 30.129 | 15.387 | 24.146 | 1.00 | 11.26 | C   |
| ATOM | 4069 | CD1 | LEU | A | 516 | 29.858 | 13.895 | 24.061 | 1.00 | 11.26 | C   |
| ATOM | 4070 | CD2 | LEU | A | 516 | 31.309 | 15.729 | 23.330 | 1.00 | 14.12 | C   |
| ATOM | 4071 | N   | SER | A | 517 | 26.489 | 17.504 | 23.015 | 1.00 | 21.27 | N   |
| ATOM | 4072 | CA  | SER | A | 517 | 25.113 | 17.099 | 22.728 | 1.00 | 18.57 | C   |
| ATOM | 4073 | C   | SER | A | 517 | 24.157 | 18.259 | 22.953 | 1.00 | 17.16 | C   |
| ATOM | 4074 | O   | SER | A | 517 | 24.307 | 18.999 | 23.915 | 1.00 | 14.00 | O   |
| ATOM | 4075 | CB  | SER | A | 517 | 24.713 | 15.963 | 23.680 | 1.00 | 20.93 | C   |
| ATOM | 4076 | OG  | SER | A | 517 | 24.982 | 16.296 | 25.045 | 1.00 | 16.97 | O   |
| ATOM | 4077 | N   | GLU | A | 518 | 23.085 | 18.293 | 22.169 | 1.00 | 18.23 | N   |
| ATOM | 4078 | CA  | GLU | A | 518 | 22.162 | 19.418 | 22.155 | 1.00 | 19.60 | C   |
| ATOM | 4079 | C   | GLU | A | 518 | 20.713 | 18.940 | 22.104 | 1.00 | 19.98 | C   |
| ATOM | 4080 | O   | GLU | A | 518 | 20.437 | 17.817 | 21.692 | 1.00 | 18.87 | O   |
| ATOM | 4081 | CB  | GLU | A | 518 | 22.443 | 20.318 | 20.947 | 1.00 | 22.90 | C   |
| ATOM | 4082 | CG  | GLU | A | 518 | 23.891 | 20.813 | 20.811 | 1.00 | 25.02 | C   |
| ATOM | 4083 | CD  | GLU | A | 518 | 23.986 | 22.237 | 20.281 | 1.00 | 22.60 | C   |
| ATOM | 4084 | OE1 | GLU | A | 518 | 23.615 | 22.475 | 19.110 | 1.00 | 20.70 | O   |
| ATOM | 4085 | OE2 | GLU | A | 518 | 24.388 | 23.126 | 21.061 | 1.00 | 23.36 | O1- |
| ATOM | 4086 | N   | LYS | A | 519 | 19.797 | 19.884 | 22.314 | 1.00 | 23.54 | N   |
| ATOM | 4087 | CA  | LYS | A | 519 | 18.371 | 19.614 | 22.551 | 1.00 | 24.75 | C   |
| ATOM | 4088 | C   | LYS | A | 519 | 18.200 | 18.755 | 23.804 | 1.00 | 27.97 | C   |
| ATOM | 4089 | O   | LYS | A | 519 | 18.733 | 17.638 | 23.900 | 1.00 | 28.69 | O   |
| ATOM | 4090 | CB  | LYS | A | 519 | 17.732 | 18.927 | 21.346 | 1.00 | 21.56 | C   |
| ATOM | 4091 | CG  | LYS | A | 519 | 16.276 | 18.526 | 21.524 | 1.00 | 16.97 | C   |
| ATOM | 4092 | CD  | LYS | A | 519 | 15.692 | 18.116 | 20.174 | 1.00 | 17.59 | C   |
| ATOM | 4093 | CE  | LYS | A | 519 | 14.341 | 17.430 | 20.287 | 1.00 | 18.48 | C   |
| ATOM | 4094 | NZ  | LYS | A | 519 | 13.728 | 17.036 | 18.962 | 1.00 | 18.54 | N1+ |
| ATOM | 4095 | N   | GLU | A | 520 | 17.552 | 19.324 | 24.817 | 1.00 | 28.25 | N   |
| ATOM | 4096 | CA  | GLU | A | 520 | 17.420 | 18.641 | 26.099 | 1.00 | 27.40 | C   |
| ATOM | 4097 | C   | GLU | A | 520 | 16.947 | 17.204 | 25.945 | 1.00 | 29.51 | C   |
| ATOM | 4098 | O   | GLU | A | 520 | 17.010 | 16.423 | 26.886 | 1.00 | 31.44 | O   |
| ATOM | 4099 | CB  | GLU | A | 520 | 16.459 | 19.417 | 26.980 | 1.00 | 22.39 | C   |
| ATOM | 4100 | CG  | GLU | A | 520 | 16.902 | 20.824 | 27.137 | 1.00 | 17.69 | C   |
| ATOM | 4101 | CD  | GLU | A | 520 | 18.391 | 20.924 | 27.333 | 1.00 | 16.28 | C   |
| ATOM | 4102 | OE1 | GLU | A | 520 | 18.877 | 20.613 | 28.429 | 1.00 | 17.87 | O   |
| ATOM | 4103 | OE2 | GLU | A | 520 | 19.084 | 21.272 | 26.372 | 1.00 | 17.14 | O1- |
| ATOM | 4104 | N   | ARG | A | 521 | 16.406 | 16.883 | 24.775 | 1.00 | 32.04 | N   |
| ATOM | 4105 | CA  | ARG | A | 521 | 16.024 | 15.522 | 24.475 | 1.00 | 33.58 | C   |
| ATOM | 4106 | C   | ARG | A | 521 | 17.287 | 14.687 | 24.495 | 1.00 | 33.32 | C   |
| ATOM | 4107 | O   | ARG | A | 521 | 17.341 | 13.664 | 25.185 | 1.00 | 35.16 | O   |
| ATOM | 4108 | CB  | ARG | A | 521 | 15.298 | 15.456 | 23.131 | 1.00 | 34.23 | C   |
| ATOM | 4109 | CG  | ARG | A | 521 | 13.950 | 16.232 | 23.131 | 1.00 | 35.49 | C   |
| ATOM | 4110 | CD  | ARG | A | 521 | 12.801 | 15.429 | 23.747 | 1.00 | 38.31 | C   |
| ATOM | 4111 | NE  | ARG | A | 521 | 12.787 | 14.036 | 23.296 | 1.00 | 39.41 | N   |
| ATOM | 4112 | CZ  | ARG | A | 521 | 12.362 | 13.650 | 22.094 | 1.00 | 40.68 | C   |
| ATOM | 4113 | NH1 | ARG | A | 521 | 11.733 | 14.513 | 21.308 | 1.00 | 43.68 | N1+ |
| ATOM | 4114 | NH2 | ARG | A | 521 | 12.479 | 12.384 | 21.712 | 1.00 | 40.15 | N   |
| ATOM | 4115 | N   | GLN | A | 522 | 18.369 | 15.302 | 24.032 | 1.00 | 30.52 | N   |

|      |      |     |     |   |     |        |        |        |      |       |     |
|------|------|-----|-----|---|-----|--------|--------|--------|------|-------|-----|
| ATOM | 4116 | CA  | GLN | A | 522 | 19.687 | 14.689 | 24.103 | 1.00 | 25.95 | C   |
| ATOM | 4117 | C   | GLN | A | 522 | 20.450 | 15.095 | 25.345 | 1.00 | 20.74 | C   |
| ATOM | 4118 | O   | GLN | A | 522 | 21.400 | 14.411 | 25.727 | 1.00 | 15.80 | O   |
| ATOM | 4119 | CB  | GLN | A | 522 | 20.515 | 15.047 | 22.867 | 1.00 | 26.11 | C   |
| ATOM | 4120 | CG  | GLN | A | 522 | 19.902 | 14.640 | 21.555 | 1.00 | 26.14 | C   |
| ATOM | 4121 | CD  | GLN | A | 522 | 20.623 | 15.273 | 20.397 | 1.00 | 28.67 | C   |
| ATOM | 4122 | NE2 | GLN | A | 522 | 19.963 | 15.346 | 19.241 | 1.00 | 26.87 | N   |
| ATOM | 4123 | OE1 | GLN | A | 522 | 21.777 | 15.681 | 20.533 | 1.00 | 27.66 | O   |
| ATOM | 4124 | N   | ILE | A | 523 | 20.145 | 16.264 | 25.897 | 1.00 | 18.75 | N   |
| ATOM | 4125 | CA  | ILE | A | 523 | 20.906 | 16.687 | 27.069 | 1.00 | 19.51 | C   |
| ATOM | 4126 | C   | ILE | A | 523 | 20.389 | 15.978 | 28.312 | 1.00 | 19.06 | C   |
| ATOM | 4127 | O   | ILE | A | 523 | 21.156 | 15.338 | 29.050 | 1.00 | 19.63 | O   |
| ATOM | 4128 | CB  | ILE | A | 523 | 20.862 | 18.206 | 27.321 | 1.00 | 17.88 | C   |
| ATOM | 4129 | CG1 | ILE | A | 523 | 20.994 | 18.975 | 26.004 | 1.00 | 21.59 | C   |
| ATOM | 4130 | CG2 | ILE | A | 523 | 21.993 | 18.578 | 28.263 | 1.00 | 18.05 | C   |
| ATOM | 4131 | CD1 | ILE | A | 523 | 21.840 | 20.265 | 26.080 | 1.00 | 21.79 | C   |
| ATOM | 4132 | N   | LYS | A | 524 | 19.076 | 16.059 | 28.512 | 1.00 | 16.03 | N   |
| ATOM | 4133 | CA  | LYS | A | 524 | 18.464 | 15.493 | 29.680 | 1.00 | 12.94 | C   |
| ATOM | 4134 | C   | LYS | A | 524 | 18.691 | 13.989 | 29.649 | 1.00 | 13.61 | C   |
| ATOM | 4135 | O   | LYS | A | 524 | 19.531 | 13.510 | 30.385 | 1.00 | 13.89 | O   |
| ATOM | 4136 | CB  | LYS | A | 524 | 16.986 | 15.858 | 29.752 | 1.00 | 10.56 | C   |
| ATOM | 4137 | CG  | LYS | A | 524 | 16.375 | 15.511 | 31.100 | 1.00 | 15.61 | C   |
| ATOM | 4138 | CD  | LYS | A | 524 | 15.266 | 16.457 | 31.565 | 1.00 | 13.48 | C   |
| ATOM | 4139 | CE  | LYS | A | 524 | 14.946 | 16.213 | 33.033 | 1.00 | 11.44 | C   |
| ATOM | 4140 | NZ  | LYS | A | 524 | 16.147 | 16.413 | 33.888 | 1.00 | 5.17  | N1+ |
| ATOM | 4141 | N   | LYS | A | 525 | 18.184 | 13.312 | 28.625 | 1.00 | 14.90 | N   |
| ATOM | 4142 | CA  | LYS | A | 525 | 18.299 | 11.851 | 28.506 | 1.00 | 16.22 | C   |
| ATOM | 4143 | C   | LYS | A | 525 | 19.550 | 11.230 | 29.180 | 1.00 | 17.48 | C   |
| ATOM | 4144 | O   | LYS | A | 525 | 19.457 | 10.186 | 29.837 | 1.00 | 16.17 | O   |
| ATOM | 4145 | CB  | LYS | A | 525 | 18.212 | 11.450 | 27.014 | 1.00 | 13.21 | C   |
| ATOM | 4146 | CG  | LYS | A | 525 | 18.854 | 10.133 | 26.631 | 1.00 | 10.66 | C   |
| ATOM | 4147 | CD  | LYS | A | 525 | 20.084 | 10.378 | 25.775 | 1.00 | 15.61 | C   |
| ATOM | 4148 | CE  | LYS | A | 525 | 20.840 | 9.078  | 25.401 | 1.00 | 17.64 | C   |
| ATOM | 4149 | NZ  | LYS | A | 525 | 21.001 | 8.890  | 23.909 | 1.00 | 14.96 | N1+ |
| ATOM | 4150 | N   | GLN | A | 526 | 20.707 | 11.881 | 29.040 | 1.00 | 18.82 | N   |
| ATOM | 4151 | CA  | GLN | A | 526 | 21.912 | 11.429 | 29.719 | 1.00 | 18.67 | C   |
| ATOM | 4152 | C   | GLN | A | 526 | 21.750 | 11.834 | 31.156 | 1.00 | 20.95 | C   |
| ATOM | 4153 | O   | GLN | A | 526 | 21.540 | 10.964 | 32.010 | 1.00 | 21.14 | O   |
| ATOM | 4154 | CB  | GLN | A | 526 | 23.178 | 12.073 | 29.151 | 1.00 | 18.08 | C   |
| ATOM | 4155 | CG  | GLN | A | 526 | 23.862 | 11.294 | 28.030 | 1.00 | 17.91 | C   |
| ATOM | 4156 | CD  | GLN | A | 526 | 23.946 | 9.804  | 28.298 | 1.00 | 20.28 | C   |
| ATOM | 4157 | NE2 | GLN | A | 526 | 23.552 | 9.007  | 27.320 | 1.00 | 22.11 | N   |
| ATOM | 4158 | OE1 | GLN | A | 526 | 24.427 | 9.376  | 29.339 | 1.00 | 22.06 | O   |
| ATOM | 4159 | N   | THR | A | 527 | 21.660 | 13.145 | 31.398 | 1.00 | 21.86 | N   |
| ATOM | 4160 | CA  | THR | A | 527 | 21.391 | 13.654 | 32.749 | 1.00 | 24.95 | C   |
| ATOM | 4161 | C   | THR | A | 527 | 20.378 | 12.766 | 33.490 | 1.00 | 25.85 | C   |
| ATOM | 4162 | O   | THR | A | 527 | 20.595 | 12.424 | 34.646 | 1.00 | 27.72 | O   |
| ATOM | 4163 | CB  | THR | A | 527 | 20.843 | 15.103 | 32.733 | 1.00 | 25.26 | C   |
| ATOM | 4164 | CG2 | THR | A | 527 | 21.009 | 15.752 | 34.105 | 1.00 | 23.79 | C   |
| ATOM | 4165 | OG1 | THR | A | 527 | 21.544 | 15.880 | 31.752 | 1.00 | 24.22 | O   |
| ATOM | 4166 | N   | ALA | A | 528 | 19.375 | 12.254 | 32.771 | 1.00 | 27.33 | N   |
| ATOM | 4167 | CA  | ALA | A | 528 | 18.426 | 11.281 | 33.333 | 1.00 | 26.81 | C   |
| ATOM | 4168 | C   | ALA | A | 528 | 18.996 | 9.857  | 33.369 | 1.00 | 25.61 | C   |
| ATOM | 4169 | O   | ALA | A | 528 | 18.965 | 9.204  | 34.412 | 1.00 | 25.23 | O   |
| ATOM | 4170 | CB  | ALA | A | 528 | 17.100 | 11.306 | 32.562 | 1.00 | 25.49 | C   |
| ATOM | 4171 | N   | LEU | A | 529 | 19.654 | 9.438  | 32.296 | 1.00 | 24.25 | N   |
| ATOM | 4172 | CA  | LEU | A | 529 | 20.315 | 8.139  | 32.279 | 1.00 | 25.05 | C   |
| ATOM | 4173 | C   | LEU | A | 529 | 21.267 | 7.996  | 33.493 | 1.00 | 25.41 | C   |
| ATOM | 4174 | O   | LEU | A | 529 | 21.762 | 6.891  | 33.797 | 1.00 | 25.16 | O   |
| ATOM | 4175 | CB  | LEU | A | 529 | 21.086 | 7.959  | 30.955 | 1.00 | 25.66 | C   |
| ATOM | 4176 | CG  | LEU | A | 529 | 20.727 | 6.802  | 30.000 | 1.00 | 24.04 | C   |
| ATOM | 4177 | CD1 | LEU | A | 529 | 20.160 | 7.352  | 28.710 | 1.00 | 19.96 | C   |
| ATOM | 4178 | CD2 | LEU | A | 529 | 21.952 | 5.961  | 29.702 | 1.00 | 21.68 | C   |
| ATOM | 4179 | N   | VAL | A | 530 | 21.523 | 9.116  | 34.175 | 1.00 | 24.26 | N   |
| ATOM | 4180 | CA  | VAL | A | 530 | 22.246 | 9.102  | 35.440 | 1.00 | 22.74 | C   |
| ATOM | 4181 | C   | VAL | A | 530 | 21.369 | 8.479  | 36.518 | 1.00 | 23.56 | C   |
| ATOM | 4182 | O   | VAL | A | 530 | 21.867 | 7.708  | 37.360 | 1.00 | 22.76 | O   |
| ATOM | 4183 | CB  | VAL | A | 530 | 22.618 | 10.525 | 35.896 | 1.00 | 23.03 | C   |
| ATOM | 4184 | CG1 | VAL | A | 530 | 23.610 | 10.471 | 37.036 | 1.00 | 24.30 | C   |
| ATOM | 4185 | CG2 | VAL | A | 530 | 23.200 | 11.305 | 34.754 | 1.00 | 22.73 | C   |
| ATOM | 4186 | N   | GLU | A | 531 | 20.076 | 8.831  | 36.502 | 1.00 | 22.46 | N   |

|      |      |     |     |   |     |        |        |        |      |       |     |
|------|------|-----|-----|---|-----|--------|--------|--------|------|-------|-----|
| ATOM | 4187 | CA  | GLU | A | 531 | 19.139 | 8.472  | 37.575 | 1.00 | 23.18 | C   |
| ATOM | 4188 | C   | GLU | A | 531 | 19.096 | 7.000  | 37.982 | 1.00 | 24.30 | C   |
| ATOM | 4189 | O   | GLU | A | 531 | 19.552 | 6.668  | 39.074 | 1.00 | 28.02 | O   |
| ATOM | 4190 | CB  | GLU | A | 531 | 17.728 | 8.959  | 37.262 | 1.00 | 22.28 | C   |
| ATOM | 4191 | CG  | GLU | A | 531 | 16.791 | 8.825  | 38.456 | 1.00 | 21.12 | C   |
| ATOM | 4192 | CD  | GLU | A | 531 | 16.177 | 10.137 | 38.917 | 1.00 | 19.64 | C   |
| ATOM | 4193 | OE1 | GLU | A | 531 | 16.850 | 10.917 | 39.623 | 1.00 | 18.65 | O   |
| ATOM | 4194 | OE2 | GLU | A | 531 | 14.977 | 10.337 | 38.671 | 1.00 | 18.88 | O1- |
| ATOM | 4195 | N   | LEU | A | 532 | 18.603 | 6.115  | 37.114 | 1.00 | 23.63 | N   |
| ATOM | 4196 | CA  | LEU | A | 532 | 18.693 | 4.662  | 37.362 | 1.00 | 24.00 | C   |
| ATOM | 4197 | C   | LEU | A | 532 | 19.972 | 4.240  | 38.078 | 1.00 | 24.04 | C   |
| ATOM | 4198 | O   | LEU | A | 532 | 19.907 | 3.770  | 39.211 | 1.00 | 26.15 | O   |
| ATOM | 4199 | CB  | LEU | A | 532 | 18.604 | 3.854  | 36.071 | 1.00 | 22.16 | C   |
| ATOM | 4200 | CG  | LEU | A | 532 | 17.991 | 4.619  | 34.926 | 1.00 | 23.10 | C   |
| ATOM | 4201 | CD1 | LEU | A | 532 | 19.075 | 5.386  | 34.246 | 1.00 | 28.26 | C   |
| ATOM | 4202 | CD2 | LEU | A | 532 | 17.348 | 3.681  | 33.973 | 1.00 | 27.82 | C   |
| ATOM | 4203 | N   | VAL | A | 533 | 21.131 | 4.440  | 37.442 | 1.00 | 22.79 | N   |
| ATOM | 4204 | CA  | VAL | A | 533 | 22.397 | 3.925  | 37.974 | 1.00 | 19.76 | C   |
| ATOM | 4205 | C   | VAL | A | 533 | 22.905 | 4.700  | 39.179 | 1.00 | 18.89 | C   |
| ATOM | 4206 | O   | VAL | A | 533 | 23.874 | 4.302  | 39.806 | 1.00 | 19.08 | O   |
| ATOM | 4207 | CB  | VAL | A | 533 | 23.521 | 3.852  | 36.889 | 1.00 | 18.59 | C   |
| ATOM | 4208 | CG1 | VAL | A | 533 | 23.308 | 2.624  | 35.996 | 1.00 | 15.07 | C   |
| ATOM | 4209 | CG2 | VAL | A | 533 | 23.560 | 5.142  | 36.045 | 1.00 | 20.41 | C   |
| ATOM | 4210 | N   | LYS | A | 534 | 22.243 | 5.792  | 39.530 | 1.00 | 19.45 | N   |
| ATOM | 4211 | CA  | LYS | A | 534 | 22.478 | 6.365  | 40.845 | 1.00 | 21.27 | C   |
| ATOM | 4212 | C   | LYS | A | 534 | 21.526 | 5.757  | 41.868 | 1.00 | 21.02 | C   |
| ATOM | 4213 | O   | LYS | A | 534 | 21.531 | 6.167  | 43.023 | 1.00 | 20.41 | O   |
| ATOM | 4214 | CB  | LYS | A | 534 | 22.357 | 7.898  | 40.818 | 1.00 | 22.77 | C   |
| ATOM | 4215 | CG  | LYS | A | 534 | 20.941 | 8.444  | 40.696 | 1.00 | 23.98 | C   |
| ATOM | 4216 | CD  | LYS | A | 534 | 20.290 | 8.641  | 42.054 | 1.00 | 28.34 | C   |
| ATOM | 4217 | CE  | LYS | A | 534 | 18.928 | 7.988  | 42.095 | 1.00 | 26.73 | C   |
| ATOM | 4218 | NZ  | LYS | A | 534 | 18.037 | 8.601  | 41.075 | 1.00 | 25.87 | N1+ |
| ATOM | 4219 | N   | HIS | A | 535 | 20.627 | 4.879  | 41.418 | 1.00 | 21.35 | N   |
| ATOM | 4220 | CA  | HIS | A | 535 | 19.932 | 3.950  | 42.323 | 1.00 | 20.99 | C   |
| ATOM | 4221 | C   | HIS | A | 535 | 19.602 | 2.550  | 41.769 | 1.00 | 22.37 | C   |
| ATOM | 4222 | O   | HIS | A | 535 | 18.524 | 2.290  | 41.214 | 1.00 | 22.53 | O   |
| ATOM | 4223 | CB  | HIS | A | 535 | 18.722 | 4.628  | 42.999 | 1.00 | 20.28 | C   |
| ATOM | 4224 | CG  | HIS | A | 535 | 17.424 | 4.489  | 42.272 | 1.00 | 16.66 | C   |
| ATOM | 4225 | CD2 | HIS | A | 535 | 17.111 | 4.603  | 40.961 | 1.00 | 19.33 | C   |
| ATOM | 4226 | ND1 | HIS | A | 535 | 16.227 | 4.401  | 42.941 | 1.00 | 14.54 | N   |
| ATOM | 4227 | CE1 | HIS | A | 535 | 15.235 | 4.488  | 42.081 | 1.00 | 19.05 | C   |
| ATOM | 4228 | NE2 | HIS | A | 535 | 15.743 | 4.611  | 40.868 | 1.00 | 19.23 | N   |
| ATOM | 4229 | N   | LYS | A | 536 | 20.476 | 1.632  | 42.174 | 1.00 | 22.18 | N   |
| ATOM | 4230 | CA  | LYS | A | 536 | 20.778 | 0.332  | 41.553 | 1.00 | 23.44 | C   |
| ATOM | 4231 | C   | LYS | A | 536 | 22.184 | 0.035  | 42.107 | 1.00 | 26.46 | C   |
| ATOM | 4232 | O   | LYS | A | 536 | 22.757 | -1.031 | 41.833 | 1.00 | 24.60 | O   |
| ATOM | 4233 | CB  | LYS | A | 536 | 20.884 | 0.419  | 40.023 | 1.00 | 18.83 | C   |
| ATOM | 4234 | CG  | LYS | A | 536 | 19.572 | 0.375  | 39.276 | 1.00 | 14.87 | C   |
| ATOM | 4235 | CD  | LYS | A | 536 | 19.778 | 0.539  | 37.773 | 1.00 | 12.15 | C   |
| ATOM | 4236 | CE  | LYS | A | 536 | 20.178 | -0.774 | 37.107 | 1.00 | 12.18 | C   |
| ATOM | 4237 | NZ  | LYS | A | 536 | 19.620 | -0.875 | 35.727 | 1.00 | 11.32 | N1+ |
| ATOM | 4238 | N   | PRO | A | 537 | 22.840 | 1.084  | 42.670 | 1.00 | 28.07 | N   |
| ATOM | 4239 | CA  | PRO | A | 537 | 23.264 | 1.257  | 44.063 | 1.00 | 27.56 | C   |
| ATOM | 4240 | C   | PRO | A | 537 | 22.139 | 1.885  | 44.911 | 1.00 | 26.87 | C   |
| ATOM | 4241 | O   | PRO | A | 537 | 21.305 | 2.611  | 44.393 | 1.00 | 26.05 | O   |
| ATOM | 4242 | CB  | PRO | A | 537 | 24.475 | 2.181  | 43.918 | 1.00 | 26.82 | C   |
| ATOM | 4243 | CG  | PRO | A | 537 | 24.086 | 3.095  | 42.877 | 1.00 | 29.18 | C   |
| ATOM | 4244 | CD  | PRO | A | 537 | 23.285 | 2.244  | 41.868 | 1.00 | 30.49 | C   |
| ATOM | 4245 | N   | LYS | A | 538 | 22.119 | 1.587  | 46.205 | 1.00 | 28.13 | N   |
| ATOM | 4246 | CA  | LYS | A | 538 | 21.009 | 1.933  | 47.109 | 1.00 | 27.98 | C   |
| ATOM | 4247 | C   | LYS | A | 538 | 19.630 | 2.015  | 46.460 | 1.00 | 26.40 | C   |
| ATOM | 4248 | O   | LYS | A | 538 | 19.218 | 3.072  | 45.974 | 1.00 | 24.43 | O   |
| ATOM | 4249 | CB  | LYS | A | 538 | 21.297 | 3.229  | 47.883 | 1.00 | 29.62 | C   |
| ATOM | 4250 | CG  | LYS | A | 538 | 21.027 | 3.139  | 49.423 | 1.00 | 25.31 | C   |
| ATOM | 4251 | CD  | LYS | A | 538 | 22.012 | 2.197  | 50.131 | 1.00 | 24.14 | C   |
| ATOM | 4252 | CE  | LYS | A | 538 | 21.945 | 2.359  | 51.647 | 1.00 | 23.68 | C   |
| ATOM | 4253 | NZ  | LYS | A | 538 | 23.277 | 2.474  | 52.317 | 1.00 | 18.75 | N1+ |
| ATOM | 4254 | N   | ALA | A | 539 | 18.869 | 0.938  | 46.625 | 1.00 | 24.41 | N   |
| ATOM | 4255 | CA  | ALA | A | 539 | 17.672 | 0.728  | 45.840 | 1.00 | 24.62 | C   |
| ATOM | 4256 | C   | ALA | A | 539 | 16.793 | 1.958  | 45.958 | 1.00 | 23.58 | C   |
| ATOM | 4257 | O   | ALA | A | 539 | 16.534 | 2.635  | 44.963 | 1.00 | 22.67 | O   |

|      |      |     |     |   |     |        |        |        |      |       |     |
|------|------|-----|-----|---|-----|--------|--------|--------|------|-------|-----|
| ATOM | 4258 | CB  | ALA | A | 539 | 16.943 | -0.511 | 46.325 | 1.00 | 25.28 | C   |
| ATOM | 4259 | N   | THR | A | 540 | 16.559 | 2.380  | 47.195 | 1.00 | 23.77 | N   |
| ATOM | 4260 | CA  | THR | A | 540 | 15.772 | 3.585  | 47.440 | 1.00 | 23.68 | C   |
| ATOM | 4261 | C   | THR | A | 540 | 16.133 | 4.351  | 48.713 | 1.00 | 25.34 | C   |
| ATOM | 4262 | O   | THR | A | 540 | 16.602 | 3.772  | 49.709 | 1.00 | 23.64 | O   |
| ATOM | 4263 | CB  | THR | A | 540 | 14.275 | 3.272  | 47.461 | 1.00 | 21.40 | C   |
| ATOM | 4264 | CG2 | THR | A | 540 | 13.857 | 2.656  | 48.804 | 1.00 | 20.40 | C   |
| ATOM | 4265 | OG1 | THR | A | 540 | 13.546 | 4.479  | 47.220 | 1.00 | 20.73 | O   |
| ATOM | 4266 | N   | LYS | A | 541 | 15.942 | 5.666  | 48.654 | 1.00 | 26.45 | N   |
| ATOM | 4267 | CA  | LYS | A | 541 | 16.156 | 6.528  | 49.810 | 1.00 | 28.39 | C   |
| ATOM | 4268 | C   | LYS | A | 541 | 15.191 | 7.698  | 49.794 | 1.00 | 27.80 | C   |
| ATOM | 4269 | O   | LYS | A | 541 | 14.459 | 7.884  | 48.830 | 1.00 | 29.39 | O   |
| ATOM | 4270 | CB  | LYS | A | 541 | 17.608 | 7.027  | 49.847 | 1.00 | 29.26 | C   |
| ATOM | 4271 | CG  | LYS | A | 541 | 18.614 | 5.982  | 50.350 | 1.00 | 25.06 | C   |
| ATOM | 4272 | CD  | LYS | A | 541 | 18.582 | 5.886  | 51.869 | 1.00 | 20.48 | C   |
| ATOM | 4273 | CE  | LYS | A | 541 | 19.335 | 7.030  | 52.505 | 1.00 | 17.85 | C   |
| ATOM | 4274 | NZ  | LYS | A | 541 | 20.734 | 7.139  | 52.022 | 1.00 | 16.81 | N1+ |
| ATOM | 4275 | N   | GLU | A | 542 | 15.016 | 8.318  | 50.952 | 1.00 | 29.97 | N   |
| ATOM | 4276 | CA  | GLU | A | 542 | 14.101 | 9.453  | 51.086 | 1.00 | 31.00 | C   |
| ATOM | 4277 | C   | GLU | A | 542 | 14.840 | 10.660 | 50.478 | 1.00 | 30.24 | C   |
| ATOM | 4278 | O   | GLU | A | 542 | 15.814 | 10.456 | 49.756 | 1.00 | 29.44 | O   |
| ATOM | 4279 | CB  | GLU | A | 542 | 13.755 | 9.669  | 52.582 | 1.00 | 29.69 | C   |
| ATOM | 4280 | CG  | GLU | A | 542 | 12.602 | 10.630 | 52.878 | 1.00 | 26.76 | C   |
| ATOM | 4281 | CD  | GLU | A | 542 | 11.289 | 10.221 | 52.240 | 1.00 | 26.79 | C   |
| ATOM | 4282 | OE1 | GLU | A | 542 | 11.093 | 9.010  | 51.995 | 1.00 | 25.61 | O   |
| ATOM | 4283 | OE2 | GLU | A | 542 | 10.425 | 11.112 | 52.035 | 1.00 | 25.89 | O1- |
| ATOM | 4284 | N   | GLN | A | 543 | 14.538 | 11.862 | 50.981 | 1.00 | 30.95 | N   |
| ATOM | 4285 | CA  | GLN | A | 543 | 15.020 | 13.157 | 50.451 | 1.00 | 29.95 | C   |
| ATOM | 4286 | C   | GLN | A | 543 | 16.307 | 13.073 | 49.606 | 1.00 | 29.03 | C   |
| ATOM | 4287 | O   | GLN | A | 543 | 16.294 | 13.347 | 48.389 | 1.00 | 25.49 | O   |
| ATOM | 4288 | CB  | GLN | A | 543 | 15.208 | 14.161 | 51.624 | 1.00 | 26.87 | C   |
| ATOM | 4289 | CG  | GLN | A | 543 | 16.249 | 13.747 | 52.684 | 1.00 | 21.98 | C   |
| ATOM | 4290 | CD  | GLN | A | 543 | 15.650 | 13.140 | 53.962 | 1.00 | 21.18 | C   |
| ATOM | 4291 | NE2 | GLN | A | 543 | 16.336 | 13.335 | 55.077 | 1.00 | 20.31 | N   |
| ATOM | 4292 | OE1 | GLN | A | 543 | 14.613 | 12.479 | 53.939 | 1.00 | 20.60 | O   |
| ATOM | 4293 | N   | LEU | A | 544 | 17.307 | 12.444 | 50.225 | 1.00 | 26.45 | N   |
| ATOM | 4294 | CA  | LEU | A | 544 | 18.653 | 12.279 | 49.694 | 1.00 | 24.19 | C   |
| ATOM | 4295 | C   | LEU | A | 544 | 18.793 | 12.637 | 48.228 | 1.00 | 22.92 | C   |
| ATOM | 4296 | O   | LEU | A | 544 | 19.185 | 13.758 | 47.923 | 1.00 | 23.86 | O   |
| ATOM | 4297 | CB  | LEU | A | 544 | 19.140 | 10.841 | 49.914 | 1.00 | 21.09 | C   |
| ATOM | 4298 | CG  | LEU | A | 544 | 19.186 | 10.233 | 51.311 | 1.00 | 16.44 | C   |
| ATOM | 4299 | CD1 | LEU | A | 544 | 19.940 | 11.158 | 52.243 | 1.00 | 16.15 | C   |
| ATOM | 4300 | CD2 | LEU | A | 544 | 17.789 | 9.967  | 51.819 | 1.00 | 16.66 | C   |
| ATOM | 4301 | N   | LYS | A | 545 | 18.194 | 11.817 | 47.362 | 1.00 | 20.06 | N   |
| ATOM | 4302 | CA  | LYS | A | 545 | 18.749 | 11.587 | 46.040 | 1.00 | 20.52 | C   |
| ATOM | 4303 | C   | LYS | A | 545 | 18.614 | 12.701 | 45.002 | 1.00 | 22.77 | C   |
| ATOM | 4304 | O   | LYS | A | 545 | 18.889 | 12.471 | 43.832 | 1.00 | 25.57 | O   |
| ATOM | 4305 | CB  | LYS | A | 545 | 18.248 | 10.254 | 45.461 | 1.00 | 18.18 | C   |
| ATOM | 4306 | CG  | LYS | A | 545 | 16.821 | 10.244 | 44.916 | 1.00 | 17.26 | C   |
| ATOM | 4307 | CD  | LYS | A | 545 | 15.906 | 9.289  | 45.696 | 1.00 | 12.74 | C   |
| ATOM | 4308 | CE  | LYS | A | 545 | 16.474 | 7.882  | 45.800 | 1.00 | 8.79  | C   |
| ATOM | 4309 | NZ  | LYS | A | 545 | 17.238 | 7.691  | 47.056 | 1.00 | 6.18  | N1+ |
| ATOM | 4310 | N   | ALA | A | 546 | 18.410 | 13.938 | 45.439 | 1.00 | 23.50 | N   |
| ATOM | 4311 | CA  | ALA | A | 546 | 18.556 | 15.071 | 44.535 | 1.00 | 22.32 | C   |
| ATOM | 4312 | C   | ALA | A | 546 | 19.741 | 15.954 | 44.903 | 1.00 | 22.35 | C   |
| ATOM | 4313 | O   | ALA | A | 546 | 20.086 | 16.854 | 44.156 | 1.00 | 23.42 | O   |
| ATOM | 4314 | CB  | ALA | A | 546 | 17.277 | 15.899 | 44.490 | 1.00 | 23.51 | C   |
| ATOM | 4315 | N   | VAL | A | 547 | 20.379 | 15.694 | 46.036 | 1.00 | 22.24 | N   |
| ATOM | 4316 | CA  | VAL | A | 547 | 21.717 | 16.229 | 46.279 | 1.00 | 23.87 | C   |
| ATOM | 4317 | C   | VAL | A | 547 | 22.677 | 15.472 | 45.360 | 1.00 | 23.89 | C   |
| ATOM | 4318 | O   | VAL | A | 547 | 23.877 | 15.782 | 45.287 | 1.00 | 23.60 | O   |
| ATOM | 4319 | CB  | VAL | A | 547 | 22.170 | 16.040 | 47.768 | 1.00 | 25.64 | C   |
| ATOM | 4320 | CG1 | VAL | A | 547 | 22.400 | 14.566 | 48.059 | 1.00 | 25.82 | C   |
| ATOM | 4321 | CG2 | VAL | A | 547 | 23.449 | 16.861 | 48.073 | 1.00 | 24.16 | C   |
| ATOM | 4322 | N   | MET | A | 548 | 22.132 | 14.475 | 44.661 | 1.00 | 22.84 | N   |
| ATOM | 4323 | CA  | MET | A | 548 | 22.841 | 13.763 | 43.593 | 1.00 | 20.52 | C   |
| ATOM | 4324 | C   | MET | A | 548 | 22.779 | 14.480 | 42.239 | 1.00 | 17.26 | C   |
| ATOM | 4325 | O   | MET | A | 548 | 23.748 | 15.082 | 41.805 | 1.00 | 17.45 | O   |
| ATOM | 4326 | CB  | MET | A | 548 | 22.268 | 12.353 | 43.445 | 1.00 | 21.64 | C   |
| ATOM | 4327 | CG  | MET | A | 548 | 22.122 | 11.605 | 44.756 | 1.00 | 18.22 | C   |
| ATOM | 4328 | SD  | MET | A | 548 | 23.630 | 10.850 | 45.228 | 1.00 | 14.88 | S   |

|      |      |     |     |   |     |        |        |        |      |       |     |
|------|------|-----|-----|---|-----|--------|--------|--------|------|-------|-----|
| ATOM | 4329 | CE  | MET | A | 548 | 24.207 | 12.056 | 46.438 | 1.00 | 16.13 | C   |
| ATOM | 4330 | N   | ASP | A | 549 | 21.618 | 14.485 | 41.609 | 1.00 | 13.78 | N   |
| ATOM | 4331 | CA  | ASP | A | 549 | 21.502 | 15.018 | 40.264 | 1.00 | 16.01 | C   |
| ATOM | 4332 | C   | ASP | A | 549 | 21.636 | 16.528 | 40.156 | 1.00 | 18.51 | C   |
| ATOM | 4333 | O   | ASP | A | 549 | 21.000 | 17.147 | 39.300 | 1.00 | 20.40 | O   |
| ATOM | 4334 | CB  | ASP | A | 549 | 20.174 | 14.604 | 39.649 | 1.00 | 14.29 | C   |
| ATOM | 4335 | CG  | ASP | A | 549 | 20.323 | 13.496 | 38.677 | 1.00 | 14.70 | C   |
| ATOM | 4336 | OD1 | ASP | A | 549 | 21.204 | 12.641 | 38.891 | 1.00 | 11.87 | O   |
| ATOM | 4337 | OD2 | ASP | A | 549 | 19.566 | 13.495 | 37.687 | 1.00 | 17.11 | O1- |
| ATOM | 4338 | N   | ASP | A | 550 | 22.330 | 17.136 | 41.102 | 1.00 | 19.81 | N   |
| ATOM | 4339 | CA  | ASP | A | 550 | 22.847 | 18.486 | 40.917 | 1.00 | 25.24 | C   |
| ATOM | 4340 | C   | ASP | A | 550 | 24.372 | 18.383 | 41.093 | 1.00 | 27.84 | C   |
| ATOM | 4341 | O   | ASP | A | 550 | 25.143 | 18.785 | 40.213 | 1.00 | 29.39 | O   |
| ATOM | 4342 | CB  | ASP | A | 550 | 22.214 | 19.460 | 41.935 | 1.00 | 24.68 | C   |
| ATOM | 4343 | CG  | ASP | A | 550 | 20.805 | 19.913 | 41.527 | 1.00 | 25.32 | C   |
| ATOM | 4344 | OD1 | ASP | A | 550 | 20.168 | 19.239 | 40.694 | 1.00 | 26.62 | O   |
| ATOM | 4345 | OD2 | ASP | A | 550 | 20.334 | 20.971 | 42.003 | 1.00 | 23.45 | O1- |
| ATOM | 4346 | N   | PHE | A | 551 | 24.778 | 17.554 | 42.046 | 1.00 | 29.10 | N   |
| ATOM | 4347 | CA  | PHE | A | 551 | 26.143 | 17.056 | 42.061 | 1.00 | 29.37 | C   |
| ATOM | 4348 | C   | PHE | A | 551 | 26.481 | 16.269 | 40.798 | 1.00 | 28.36 | C   |
| ATOM | 4349 | O   | PHE | A | 551 | 27.633 | 15.963 | 40.538 | 1.00 | 29.93 | O   |
| ATOM | 4350 | CB  | PHE | A | 551 | 26.361 | 16.227 | 43.324 | 1.00 | 30.56 | C   |
| ATOM | 4351 | CG  | PHE | A | 551 | 26.670 | 17.064 | 44.509 | 1.00 | 31.41 | C   |
| ATOM | 4352 | CD1 | PHE | A | 551 | 26.260 | 18.398 | 44.526 | 1.00 | 31.60 | C   |
| ATOM | 4353 | CD2 | PHE | A | 551 | 27.588 | 16.637 | 45.447 | 1.00 | 32.87 | C   |
| ATOM | 4354 | CE1 | PHE | A | 551 | 26.774 | 19.299 | 45.427 | 1.00 | 31.67 | C   |
| ATOM | 4355 | CE2 | PHE | A | 551 | 28.120 | 17.542 | 46.375 | 1.00 | 34.18 | C   |
| ATOM | 4356 | CZ  | PHE | A | 551 | 27.712 | 18.878 | 46.357 | 1.00 | 33.28 | C   |
| ATOM | 4357 | N   | ALA | A | 552 | 25.470 | 16.021 | 39.976 | 1.00 | 27.01 | N   |
| ATOM | 4358 | CA  | ALA | A | 552 | 25.676 | 15.608 | 38.605 | 1.00 | 25.37 | C   |
| ATOM | 4359 | C   | ALA | A | 552 | 24.735 | 16.431 | 37.719 | 1.00 | 25.73 | C   |
| ATOM | 4360 | O   | ALA | A | 552 | 23.980 | 15.910 | 36.886 | 1.00 | 24.39 | O   |
| ATOM | 4361 | CB  | ALA | A | 552 | 25.417 | 14.134 | 38.461 | 1.00 | 26.18 | C   |
| ATOM | 4362 | N   | ALA | A | 553 | 24.769 | 17.732 | 37.975 | 1.00 | 24.63 | N   |
| ATOM | 4363 | CA  | ALA | A | 553 | 24.274 | 18.746 | 37.068 | 1.00 | 22.98 | C   |
| ATOM | 4364 | C   | ALA | A | 553 | 25.328 | 19.824 | 37.002 | 1.00 | 25.17 | C   |
| ATOM | 4365 | O   | ALA | A | 553 | 25.138 | 20.792 | 36.306 | 1.00 | 26.82 | O   |
| ATOM | 4366 | CB  | ALA | A | 553 | 23.003 | 19.333 | 37.572 | 1.00 | 23.98 | C   |
| ATOM | 4367 | N   | PHE | A | 554 | 26.340 | 19.752 | 37.866 | 1.00 | 27.85 | N   |
| ATOM | 4368 | CA  | PHE | A | 554 | 27.586 | 20.505 | 37.668 | 1.00 | 28.64 | C   |
| ATOM | 4369 | C   | PHE | A | 554 | 28.412 | 19.808 | 36.596 | 1.00 | 25.54 | C   |
| ATOM | 4370 | O   | PHE | A | 554 | 29.324 | 20.398 | 36.026 | 1.00 | 24.77 | O   |
| ATOM | 4371 | CB  | PHE | A | 554 | 28.405 | 20.583 | 38.968 | 1.00 | 32.92 | C   |
| ATOM | 4372 | CG  | PHE | A | 554 | 28.806 | 21.997 | 39.366 | 1.00 | 37.67 | C   |
| ATOM | 4373 | CD1 | PHE | A | 554 | 28.374 | 23.110 | 38.618 | 1.00 | 39.00 | C   |
| ATOM | 4374 | CD2 | PHE | A | 554 | 29.534 | 22.220 | 40.544 | 1.00 | 37.65 | C   |
| ATOM | 4375 | CE1 | PHE | A | 554 | 28.648 | 24.436 | 39.051 | 1.00 | 39.21 | C   |
| ATOM | 4376 | CE2 | PHE | A | 554 | 29.818 | 23.532 | 40.984 | 1.00 | 40.34 | C   |
| ATOM | 4377 | CZ  | PHE | A | 554 | 29.369 | 24.647 | 40.233 | 1.00 | 39.54 | C   |
| ATOM | 4378 | N   | VAL | A | 555 | 28.081 | 18.543 | 36.352 | 1.00 | 23.93 | N   |
| ATOM | 4379 | CA  | VAL | A | 555 | 28.467 | 17.800 | 35.147 | 1.00 | 22.21 | C   |
| ATOM | 4380 | C   | VAL | A | 555 | 28.557 | 18.670 | 33.893 | 1.00 | 20.12 | C   |
| ATOM | 4381 | O   | VAL | A | 555 | 29.305 | 18.360 | 32.975 | 1.00 | 18.10 | O   |
| ATOM | 4382 | CB  | VAL | A | 555 | 27.484 | 16.602 | 34.897 | 1.00 | 21.30 | C   |
| ATOM | 4383 | CG1 | VAL | A | 555 | 26.074 | 17.094 | 34.820 | 1.00 | 22.10 | C   |
| ATOM | 4384 | CG2 | VAL | A | 555 | 27.815 | 15.870 | 33.632 | 1.00 | 22.52 | C   |
| ATOM | 4385 | N   | GLU | A | 556 | 27.829 | 19.772 | 33.855 | 1.00 | 20.36 | N   |
| ATOM | 4386 | CA  | GLU | A | 556 | 28.107 | 20.753 | 32.822 | 1.00 | 22.51 | C   |
| ATOM | 4387 | C   | GLU | A | 556 | 29.129 | 21.755 | 33.324 | 1.00 | 22.13 | C   |
| ATOM | 4388 | O   | GLU | A | 556 | 30.316 | 21.503 | 33.183 | 1.00 | 21.46 | O   |
| ATOM | 4389 | CB  | GLU | A | 556 | 26.827 | 21.440 | 32.333 | 1.00 | 24.42 | C   |
| ATOM | 4390 | CG  | GLU | A | 556 | 26.014 | 20.591 | 31.348 | 1.00 | 25.09 | C   |
| ATOM | 4391 | CD  | GLU | A | 556 | 25.397 | 19.340 | 32.002 | 1.00 | 29.89 | C   |
| ATOM | 4392 | OE1 | GLU | A | 556 | 26.157 | 18.391 | 32.313 | 1.00 | 28.92 | O   |
| ATOM | 4393 | OE2 | GLU | A | 556 | 24.150 | 19.300 | 32.192 | 1.00 | 30.78 | O1- |
| ATOM | 4394 | N   | LYS | A | 557 | 28.693 | 22.721 | 34.130 | 1.00 | 23.25 | N   |
| ATOM | 4395 | CA  | LYS | A | 557 | 29.514 | 23.885 | 34.484 | 1.00 | 26.16 | C   |
| ATOM | 4396 | C   | LYS | A | 557 | 30.893 | 23.667 | 35.189 | 1.00 | 28.55 | C   |
| ATOM | 4397 | O   | LYS | A | 557 | 31.455 | 24.625 | 35.736 | 1.00 | 32.54 | O   |
| ATOM | 4398 | CB  | LYS | A | 557 | 28.688 | 24.876 | 35.319 | 1.00 | 25.61 | C   |
| ATOM | 4399 | CG  | LYS | A | 557 | 27.221 | 24.986 | 34.979 | 1.00 | 25.26 | C   |



|      |      |     |     |   |     |        |        |        |      |       |     |
|------|------|-----|-----|---|-----|--------|--------|--------|------|-------|-----|
| ATOM | 4400 | CD  | LYS | A | 557 | 26.383 | 25.468 | 36.212 | 1.00 | 26.93 | C   |
| ATOM | 4401 | CE  | LYS | A | 557 | 24.868 | 25.275 | 35.938 | 1.00 | 29.30 | C   |
| ATOM | 4402 | NZ  | LYS | A | 557 | 23.869 | 26.075 | 36.726 | 1.00 | 26.93 | N1+ |
| ATOM | 4403 | N   | CYS | A | 558 | 31.439 | 22.448 | 35.204 | 1.00 | 28.73 | N   |
| ATOM | 4404 | CA  | CYS | A | 558 | 32.899 | 22.266 | 35.342 | 1.00 | 26.69 | C   |
| ATOM | 4405 | C   | CYS | A | 558 | 33.460 | 21.735 | 34.016 | 1.00 | 26.16 | C   |
| ATOM | 4406 | O   | CYS | A | 558 | 34.575 | 21.193 | 33.962 | 1.00 | 25.82 | O   |
| ATOM | 4407 | CB  | CYS | A | 558 | 33.247 | 21.290 | 36.484 | 1.00 | 27.88 | C   |
| ATOM | 4408 | SG  | CYS | A | 558 | 34.126 | 19.745 | 35.984 | 1.00 | 25.90 | S   |
| ATOM | 4409 | N   | CYS | A | 559 | 32.702 | 21.924 | 32.939 | 1.00 | 24.28 | N   |
| ATOM | 4410 | CA  | CYS | A | 559 | 33.067 | 21.378 | 31.638 | 1.00 | 24.57 | C   |
| ATOM | 4411 | C   | CYS | A | 559 | 33.527 | 22.453 | 30.635 | 1.00 | 25.31 | C   |
| ATOM | 4412 | O   | CYS | A | 559 | 32.955 | 22.594 | 29.534 | 1.00 | 22.80 | O   |
| ATOM | 4413 | CB  | CYS | A | 559 | 31.882 | 20.610 | 31.057 | 1.00 | 24.33 | C   |
| ATOM | 4414 | SG  | CYS | A | 559 | 30.664 | 21.671 | 30.225 | 1.00 | 18.67 | S   |
| ATOM | 4415 | N   | LYS | A | 560 | 34.588 | 23.170 | 30.993 | 1.00 | 24.30 | N   |
| ATOM | 4416 | CA  | LYS | A | 560 | 35.196 | 24.124 | 30.082 | 1.00 | 24.61 | C   |
| ATOM | 4417 | C   | LYS | A | 560 | 36.487 | 24.703 | 30.634 | 1.00 | 24.70 | C   |
| ATOM | 4418 | O   | LYS | A | 560 | 36.873 | 24.417 | 31.765 | 1.00 | 22.58 | O   |
| ATOM | 4419 | CB  | LYS | A | 560 | 34.215 | 25.242 | 29.754 | 1.00 | 25.54 | C   |
| ATOM | 4420 | CG  | LYS | A | 560 | 33.656 | 25.152 | 28.339 | 1.00 | 26.31 | C   |
| ATOM | 4421 | CD  | LYS | A | 560 | 32.511 | 26.109 | 28.108 | 1.00 | 24.00 | C   |
| ATOM | 4422 | CE  | LYS | A | 560 | 31.495 | 25.480 | 27.188 | 1.00 | 25.24 | C   |
| ATOM | 4423 | NZ  | LYS | A | 560 | 31.446 | 24.014 | 27.391 | 1.00 | 26.72 | N1+ |
| ATOM | 4424 | N   | ALA | A | 561 | 37.126 | 25.555 | 29.841 | 1.00 | 24.25 | N   |
| ATOM | 4425 | CA  | ALA | A | 561 | 38.507 | 25.915 | 30.078 | 1.00 | 24.71 | C   |
| ATOM | 4426 | C   | ALA | A | 561 | 39.300 | 24.620 | 30.175 | 1.00 | 26.65 | C   |
| ATOM | 4427 | O   | ALA | A | 561 | 39.333 | 23.999 | 31.218 | 1.00 | 27.41 | O   |
| ATOM | 4428 | CB  | ALA | A | 561 | 38.622 | 26.707 | 31.359 | 1.00 | 25.16 | C   |
| ATOM | 4429 | N   | ASP | A | 562 | 39.642 | 24.065 | 29.016 | 1.00 | 30.60 | N   |
| ATOM | 4430 | CA  | ASP | A | 562 | 40.525 | 22.892 | 28.929 | 1.00 | 30.34 | C   |
| ATOM | 4431 | C   | ASP | A | 562 | 39.961 | 21.653 | 29.616 | 1.00 | 31.09 | C   |
| ATOM | 4432 | O   | ASP | A | 562 | 40.593 | 21.132 | 30.562 | 1.00 | 31.08 | O   |
| ATOM | 4433 | CB  | ASP | A | 562 | 41.905 | 23.198 | 29.516 | 1.00 | 28.16 | C   |
| ATOM | 4434 | CG  | ASP | A | 562 | 42.952 | 22.216 | 29.054 | 1.00 | 25.04 | C   |
| ATOM | 4435 | OD1 | ASP | A | 562 | 42.717 | 21.514 | 28.053 | 1.00 | 24.20 | O   |
| ATOM | 4436 | OD2 | ASP | A | 562 | 44.000 | 22.117 | 29.707 | 1.00 | 28.51 | O1- |
| ATOM | 4437 | N   | ASP | A | 563 | 38.979 | 21.040 | 28.935 | 1.00 | 30.71 | N   |
| ATOM | 4438 | CA  | ASP | A | 563 | 38.059 | 20.068 | 29.538 | 1.00 | 28.76 | C   |
| ATOM | 4439 | C   | ASP | A | 563 | 38.485 | 18.610 | 29.373 | 1.00 | 28.00 | C   |
| ATOM | 4440 | O   | ASP | A | 563 | 39.612 | 18.256 | 29.693 | 1.00 | 28.65 | O   |
| ATOM | 4441 | CB  | ASP | A | 563 | 36.615 | 20.261 | 29.028 | 1.00 | 30.30 | C   |
| ATOM | 4442 | CG  | ASP | A | 563 | 36.508 | 21.125 | 27.746 | 1.00 | 33.01 | C   |
| ATOM | 4443 | OD1 | ASP | A | 563 | 37.154 | 22.206 | 27.640 | 1.00 | 32.70 | O   |
| ATOM | 4444 | OD2 | ASP | A | 563 | 35.634 | 20.803 | 26.908 | 1.00 | 31.15 | O1- |
| ATOM | 4445 | N   | LYS | A | 564 | 37.563 | 17.749 | 28.966 | 1.00 | 29.53 | N   |
| ATOM | 4446 | CA  | LYS | A | 564 | 37.756 | 16.283 | 28.945 | 1.00 | 31.53 | C   |
| ATOM | 4447 | C   | LYS | A | 564 | 38.549 | 15.598 | 30.061 | 1.00 | 32.06 | C   |
| ATOM | 4448 | O   | LYS | A | 564 | 38.498 | 14.370 | 30.188 | 1.00 | 32.29 | O   |
| ATOM | 4449 | CB  | LYS | A | 564 | 38.296 | 15.821 | 27.591 | 1.00 | 30.45 | C   |
| ATOM | 4450 | CG  | LYS | A | 564 | 37.233 | 15.744 | 26.497 | 1.00 | 31.07 | C   |
| ATOM | 4451 | CD  | LYS | A | 564 | 36.111 | 14.775 | 26.849 | 1.00 | 30.53 | C   |
| ATOM | 4452 | CE  | LYS | A | 564 | 35.347 | 14.318 | 25.598 | 1.00 | 32.26 | C   |
| ATOM | 4453 | NZ  | LYS | A | 564 | 35.355 | 12.798 | 25.474 | 1.00 | 34.40 | N1+ |
| ATOM | 4454 | N   | GLU | A | 565 | 39.050 | 16.383 | 31.006 | 1.00 | 34.20 | N   |
| ATOM | 4455 | CA  | GLU | A | 565 | 39.522 | 15.830 | 32.269 | 1.00 | 33.71 | C   |
| ATOM | 4456 | C   | GLU | A | 565 | 39.123 | 16.707 | 33.477 | 1.00 | 33.57 | C   |
| ATOM | 4457 | O   | GLU | A | 565 | 39.325 | 16.298 | 34.620 | 1.00 | 36.71 | O   |
| ATOM | 4458 | CB  | GLU | A | 565 | 41.038 | 15.547 | 32.203 | 1.00 | 31.00 | C   |
| ATOM | 4459 | CG  | GLU | A | 565 | 41.948 | 16.433 | 33.029 | 1.00 | 28.71 | C   |
| ATOM | 4460 | CD  | GLU | A | 565 | 41.705 | 17.906 | 32.810 | 1.00 | 28.14 | C   |
| ATOM | 4461 | OE1 | GLU | A | 565 | 41.476 | 18.343 | 31.664 | 1.00 | 27.94 | O   |
| ATOM | 4462 | OE2 | GLU | A | 565 | 41.605 | 18.611 | 33.826 | 1.00 | 31.46 | O1- |
| ATOM | 4463 | N   | THR | A | 566 | 38.550 | 17.891 | 33.230 | 1.00 | 31.43 | N   |
| ATOM | 4464 | CA  | THR | A | 566 | 37.891 | 18.648 | 34.290 | 1.00 | 30.06 | C   |
| ATOM | 4465 | C   | THR | A | 566 | 36.888 | 17.740 | 34.978 | 1.00 | 31.89 | C   |
| ATOM | 4466 | O   | THR | A | 566 | 37.183 | 17.117 | 36.017 | 1.00 | 33.59 | O   |
| ATOM | 4467 | CB  | THR | A | 566 | 37.091 | 19.837 | 33.754 | 1.00 | 27.34 | C   |
| ATOM | 4468 | CG2 | THR | A | 566 | 37.562 | 21.118 | 34.385 | 1.00 | 29.75 | C   |
| ATOM | 4469 | OG1 | THR | A | 566 | 37.226 | 19.915 | 32.329 | 1.00 | 28.29 | O   |
| ATOM | 4470 | N   | CYS | A | 567 | 35.700 | 17.644 | 34.390 | 1.00 | 32.18 | N   |

|      |      |     |     |   |     |        |        |        |      |       |     |
|------|------|-----|-----|---|-----|--------|--------|--------|------|-------|-----|
| ATOM | 4471 | CA  | CYS | A | 567 | 34.654 | 16.825 | 34.979 | 1.00 | 31.39 | C   |
| ATOM | 4472 | C   | CYS | A | 567 | 34.889 | 15.378 | 34.594 | 1.00 | 29.93 | C   |
| ATOM | 4473 | O   | CYS | A | 567 | 34.352 | 14.909 | 33.590 | 1.00 | 29.42 | O   |
| ATOM | 4474 | CB  | CYS | A | 567 | 33.262 | 17.276 | 34.513 | 1.00 | 29.68 | C   |
| ATOM | 4475 | SG  | CYS | A | 567 | 33.055 | 19.080 | 34.407 | 1.00 | 25.19 | S   |
| ATOM | 4476 | N   | PHE | A | 568 | 35.686 | 14.688 | 35.405 | 1.00 | 28.61 | N   |
| ATOM | 4477 | CA  | PHE | A | 568 | 35.928 | 13.255 | 35.250 | 1.00 | 28.31 | C   |
| ATOM | 4478 | C   | PHE | A | 568 | 36.751 | 12.792 | 36.449 | 1.00 | 29.41 | C   |
| ATOM | 4479 | O   | PHE | A | 568 | 36.664 | 11.642 | 36.860 | 1.00 | 31.51 | O   |
| ATOM | 4480 | CB  | PHE | A | 568 | 36.729 | 12.998 | 33.976 | 1.00 | 25.95 | C   |
| ATOM | 4481 | CG  | PHE | A | 568 | 36.206 | 11.876 | 33.139 | 1.00 | 21.28 | C   |
| ATOM | 4482 | CD1 | PHE | A | 568 | 35.062 | 12.035 | 32.394 | 1.00 | 20.57 | C   |
| ATOM | 4483 | CD2 | PHE | A | 568 | 36.903 | 10.698 | 33.038 | 1.00 | 20.14 | C   |
| ATOM | 4484 | CE1 | PHE | A | 568 | 34.622 | 11.051 | 31.574 | 1.00 | 17.15 | C   |
| ATOM | 4485 | CE2 | PHE | A | 568 | 36.471 | 9.710  | 32.217 | 1.00 | 17.57 | C   |
| ATOM | 4486 | CZ  | PHE | A | 568 | 35.321 | 9.888  | 31.481 | 1.00 | 19.73 | C   |
| ATOM | 4487 | N   | ALA | A | 569 | 37.683 | 13.636 | 36.877 | 1.00 | 28.87 | N   |
| ATOM | 4488 | CA  | ALA | A | 569 | 38.383 | 13.420 | 38.134 | 1.00 | 28.65 | C   |
| ATOM | 4489 | C   | ALA | A | 569 | 37.468 | 13.939 | 39.220 | 1.00 | 28.03 | C   |
| ATOM | 4490 | O   | ALA | A | 569 | 37.356 | 13.378 | 40.309 | 1.00 | 26.78 | O   |
| ATOM | 4491 | CB  | ALA | A | 569 | 39.710 | 14.213 | 38.138 | 1.00 | 30.00 | C   |
| ATOM | 4492 | N   | GLU | A | 570 | 36.832 | 15.057 | 38.898 | 1.00 | 30.62 | N   |
| ATOM | 4493 | CA  | GLU | A | 570 | 36.151 | 15.878 | 39.882 | 1.00 | 30.63 | C   |
| ATOM | 4494 | C   | GLU | A | 570 | 34.945 | 15.123 | 40.390 | 1.00 | 30.05 | C   |
| ATOM | 4495 | O   | GLU | A | 570 | 35.001 | 14.560 | 41.483 | 1.00 | 29.90 | O   |
| ATOM | 4496 | CB  | GLU | A | 570 | 35.749 | 17.210 | 39.258 | 1.00 | 28.89 | C   |
| ATOM | 4497 | CG  | GLU | A | 570 | 36.936 | 18.084 | 38.893 | 1.00 | 27.66 | C   |
| ATOM | 4498 | CD  | GLU | A | 570 | 36.512 | 19.417 | 38.301 | 1.00 | 29.60 | C   |
| ATOM | 4499 | OE1 | GLU | A | 570 | 35.295 | 19.714 | 38.265 | 1.00 | 27.40 | O   |
| ATOM | 4500 | OE2 | GLU | A | 570 | 37.407 | 20.200 | 37.922 | 1.00 | 31.42 | O1- |
| ATOM | 4501 | N   | GLU | A | 571 | 33.921 | 15.009 | 39.544 | 1.00 | 28.64 | N   |
| ATOM | 4502 | CA  | GLU | A | 571 | 32.793 | 14.109 | 39.781 | 1.00 | 29.73 | C   |
| ATOM | 4503 | C   | GLU | A | 571 | 33.172 | 12.828 | 40.555 | 1.00 | 29.42 | C   |
| ATOM | 4504 | O   | GLU | A | 571 | 32.703 | 12.600 | 41.666 | 1.00 | 26.88 | O   |
| ATOM | 4505 | CB  | GLU | A | 571 | 32.153 | 13.698 | 38.444 | 1.00 | 31.90 | C   |
| ATOM | 4506 | CG  | GLU | A | 571 | 31.887 | 14.842 | 37.444 | 1.00 | 33.12 | C   |
| ATOM | 4507 | CD  | GLU | A | 571 | 30.475 | 15.396 | 37.551 | 1.00 | 31.21 | C   |
| ATOM | 4508 | OE1 | GLU | A | 571 | 30.276 | 16.300 | 38.392 | 1.00 | 29.20 | O   |
| ATOM | 4509 | OE2 | GLU | A | 571 | 29.584 | 14.930 | 36.791 | 1.00 | 28.63 | O1- |
| ATOM | 4510 | N   | GLY | A | 572 | 34.072 | 12.032 | 39.986 | 1.00 | 29.49 | N   |
| ATOM | 4511 | CA  | GLY | A | 572 | 34.301 | 10.677 | 40.478 | 1.00 | 28.71 | C   |
| ATOM | 4512 | C   | GLY | A | 572 | 34.559 | 10.612 | 41.965 | 1.00 | 25.97 | C   |
| ATOM | 4513 | O   | GLY | A | 572 | 34.133 | 9.670  | 42.649 | 1.00 | 25.03 | O   |
| ATOM | 4514 | N   | LYS | A | 573 | 35.292 | 11.596 | 42.463 | 1.00 | 25.00 | N   |
| ATOM | 4515 | CA  | LYS | A | 573 | 35.292 | 11.839 | 43.886 | 1.00 | 26.40 | C   |
| ATOM | 4516 | C   | LYS | A | 573 | 33.907 | 12.403 | 44.227 | 1.00 | 27.40 | C   |
| ATOM | 4517 | O   | LYS | A | 573 | 33.053 | 11.637 | 44.652 | 1.00 | 28.80 | O   |
| ATOM | 4518 | CB  | LYS | A | 573 | 36.422 | 12.802 | 44.278 | 1.00 | 25.67 | C   |
| ATOM | 4519 | CG  | LYS | A | 573 | 37.835 | 12.284 | 43.924 | 1.00 | 24.04 | C   |
| ATOM | 4520 | CD  | LYS | A | 573 | 38.725 | 12.132 | 45.169 | 1.00 | 21.49 | C   |
| ATOM | 4521 | CE  | LYS | A | 573 | 39.633 | 13.331 | 45.408 | 1.00 | 17.20 | C   |
| ATOM | 4522 | NZ  | LYS | A | 573 | 40.867 | 12.848 | 46.062 | 1.00 | 15.20 | N1+ |
| ATOM | 4523 | N   | LYS | A | 574 | 33.581 | 13.580 | 43.695 | 1.00 | 26.75 | N   |
| ATOM | 4524 | CA  | LYS | A | 574 | 32.400 | 14.324 | 44.131 | 1.00 | 25.51 | C   |
| ATOM | 4525 | C   | LYS | A | 574 | 30.989 | 13.898 | 43.651 | 1.00 | 25.42 | C   |
| ATOM | 4526 | O   | LYS | A | 574 | 30.011 | 14.569 | 44.005 | 1.00 | 25.17 | O   |
| ATOM | 4527 | CB  | LYS | A | 574 | 32.612 | 15.817 | 43.872 | 1.00 | 27.14 | C   |
| ATOM | 4528 | CG  | LYS | A | 574 | 32.851 | 16.209 | 42.416 | 1.00 | 28.72 | C   |
| ATOM | 4529 | CD  | LYS | A | 574 | 32.816 | 17.739 | 42.193 | 1.00 | 28.75 | C   |
| ATOM | 4530 | CE  | LYS | A | 574 | 31.382 | 18.254 | 41.916 | 1.00 | 28.20 | C   |
| ATOM | 4531 | NZ  | LYS | A | 574 | 31.384 | 19.599 | 41.254 | 1.00 | 28.78 | N1+ |
| ATOM | 4532 | N   | LEU | A | 575 | 30.860 | 12.683 | 43.105 | 1.00 | 23.44 | N   |
| ATOM | 4533 | CA  | LEU | A | 575 | 29.559 | 12.086 | 42.759 | 1.00 | 25.31 | C   |
| ATOM | 4534 | C   | LEU | A | 575 | 29.409 | 10.605 | 43.176 | 1.00 | 27.47 | C   |
| ATOM | 4535 | O   | LEU | A | 575 | 28.300 | 10.045 | 43.137 | 1.00 | 26.81 | O   |
| ATOM | 4536 | CB  | LEU | A | 575 | 29.301 | 12.205 | 41.264 | 1.00 | 24.20 | C   |
| ATOM | 4537 | CG  | LEU | A | 575 | 28.778 | 10.958 | 40.541 | 1.00 | 24.99 | C   |
| ATOM | 4538 | CD1 | LEU | A | 575 | 27.265 | 11.091 | 40.260 | 1.00 | 22.96 | C   |
| ATOM | 4539 | CD2 | LEU | A | 575 | 29.587 | 10.746 | 39.253 | 1.00 | 23.54 | C   |
| ATOM | 4540 | N   | VAL | A | 576 | 30.545 | 9.953  | 43.443 | 1.00 | 30.48 | N   |
| ATOM | 4541 | CA  | VAL | A | 576 | 30.594 | 8.583  | 43.980 | 1.00 | 28.40 | C   |

|      |      |     |     |   |     |        |        |        |      |       |  |   |
|------|------|-----|-----|---|-----|--------|--------|--------|------|-------|--|---|
| ATOM | 4542 | C   | VAL | A | 576 | 30.933 | 8.698  | 45.451 | 1.00 | 26.50 |  | C |
| ATOM | 4543 | O   | VAL | A | 576 | 30.389 | 7.969  | 46.264 | 1.00 | 26.24 |  | O |
| ATOM | 4544 | CB  | VAL | A | 576 | 31.703 | 7.709  | 43.313 | 1.00 | 29.72 |  | C |
| ATOM | 4545 | CG1 | VAL | A | 576 | 31.613 | 6.269  | 43.830 | 1.00 | 31.31 |  | C |
| ATOM | 4546 | CG2 | VAL | A | 576 | 31.568 | 7.728  | 41.788 | 1.00 | 28.27 |  | C |
| ATOM | 4547 | N   | ALA | A | 577 | 31.839 | 9.614  | 45.783 | 1.00 | 26.23 |  | N |
| ATOM | 4548 | CA  | ALA | A | 577 | 32.042 | 10.018 | 47.171 | 1.00 | 27.55 |  | C |
| ATOM | 4549 | C   | ALA | A | 577 | 30.723 | 10.465 | 47.754 | 1.00 | 27.60 |  | C |
| ATOM | 4550 | O   | ALA | A | 577 | 30.498 | 10.341 | 48.959 | 1.00 | 29.06 |  | O |
| ATOM | 4551 | CB  | ALA | A | 577 | 33.057 | 11.163 | 47.280 | 1.00 | 24.38 |  | C |
| ATOM | 4552 | N   | ALA | A | 578 | 29.896 | 11.084 | 46.921 | 1.00 | 26.48 |  | N |
| ATOM | 4553 | CA  | ALA | A | 578 | 28.663 | 11.639 | 47.421 | 1.00 | 28.56 |  | C |
| ATOM | 4554 | C   | ALA | A | 578 | 27.604 | 10.545 | 47.504 | 1.00 | 30.37 |  | C |
| ATOM | 4555 | O   | ALA | A | 578 | 26.515 | 10.788 | 48.040 | 1.00 | 32.62 |  | O |
| ATOM | 4556 | CB  | ALA | A | 578 | 28.198 | 12.775 | 46.522 | 1.00 | 27.95 |  | C |
| ATOM | 4557 | N   | SER | A | 579 | 27.969 | 9.336  | 47.045 | 1.00 | 30.43 |  | N |
| ATOM | 4558 | CA  | SER | A | 579 | 27.041 | 8.214  | 46.794 | 1.00 | 28.38 |  | C |
| ATOM | 4559 | C   | SER | A | 579 | 26.717 | 7.338  | 48.012 | 1.00 | 28.20 |  | C |
| ATOM | 4560 | O   | SER | A | 579 | 27.423 | 7.379  | 49.026 | 1.00 | 27.16 |  | O |
| ATOM | 4561 | CB  | SER | A | 579 | 27.600 | 7.308  | 45.678 | 1.00 | 26.10 |  | C |
| ATOM | 4562 | OG  | SER | A | 579 | 27.127 | 7.695  | 44.407 | 1.00 | 21.67 |  | O |
| ATOM | 4563 | N   | GLN | A | 580 | 25.858 | 6.349  | 47.756 | 1.00 | 28.20 |  | N |
| ATOM | 4564 | CA  | GLN | A | 580 | 25.294 | 5.456  | 48.775 | 1.00 | 30.20 |  | C |
| ATOM | 4565 | C   | GLN | A | 580 | 25.251 | 5.794  | 50.275 | 1.00 | 29.79 |  | C |
| ATOM | 4566 | O   | GLN | A | 580 | 24.240 | 6.301  | 50.763 | 1.00 | 29.46 |  | O |
| ATOM | 4567 | CB  | GLN | A | 580 | 25.887 | 4.059  | 48.652 | 1.00 | 31.82 |  | C |
| ATOM | 4568 | CG  | GLN | A | 580 | 24.809 | 3.035  | 48.450 | 1.00 | 35.01 |  | C |
| ATOM | 4569 | CD  | GLN | A | 580 | 24.605 | 2.755  | 46.984 | 1.00 | 39.20 |  | C |
| ATOM | 4570 | NE2 | GLN | A | 580 | 24.214 | 3.795  | 46.222 | 1.00 | 39.46 |  | N |
| ATOM | 4571 | OE1 | GLN | A | 580 | 24.873 | 1.642  | 46.513 | 1.00 | 37.19 |  | O |
| ATOM | 4572 | N   | ALA | A | 581 | 26.147 | 5.153  | 51.022 | 1.00 | 28.09 |  | N |
| ATOM | 4573 | CA  | ALA | A | 581 | 25.904 | 4.949  | 52.433 | 1.00 | 28.48 |  | C |
| ATOM | 4574 | C   | ALA | A | 581 | 26.749 | 5.880  | 53.305 | 1.00 | 31.33 |  | C |
| ATOM | 4575 | O   | ALA | A | 581 | 27.878 | 5.542  | 53.689 | 1.00 | 33.68 |  | O |
| ATOM | 4576 | CB  | ALA | A | 581 | 26.139 | 3.517  | 52.786 | 1.00 | 27.41 |  | C |
| ATOM | 4577 | N   | ALA | A | 582 | 26.292 | 7.133  | 53.354 | 1.00 | 32.13 |  | N |
| ATOM | 4578 | CA  | ALA | A | 582 | 26.690 | 8.140  | 54.330 | 1.00 | 30.12 |  | C |
| ATOM | 4579 | C   | ALA | A | 582 | 25.992 | 9.430  | 53.865 | 1.00 | 32.98 |  | C |
| ATOM | 4580 | O   | ALA | A | 582 | 25.336 | 10.117 | 54.686 | 1.00 | 34.50 |  | O |
| ATOM | 4581 | CB  | ALA | A |     |        |        |        |      |       |  |   |

```
CONNECT 4594 4591 4599 4597
CONNECT 4595 4592 4596
CONNECT 4596 4591 4595 4606
CONNECT 4597 4594 4605
CONNECT 4598 4603 4604 4605
CONNECT 4599 4594 4606
CONNECT 4600 4606
CONNECT 4601 4608
CONNECT 4602 4607 4608 4605
CONNECT 4603 4598
CONNECT 4604 4598
CONNECT 4605 4598 4597 4602
CONNECT 4606 4599 4596 4600
CONNECT 4607 4602
CONNECT 4608 4602 4601
END
```
